# Supplementary material for: Comprehensive phenotyping and transcriptome profiling to study nanotoxicity in C. elegans
Source: PeerJ. 2020 Feb 27;8:e8684. doi: 10.7717/peerj.8684 (PMC7049462; doi:10.7717/peerj.8684)
Supplement: Data S1 — A total of 2648 genes were differentially expressed in Group Ag and a total of 1087 genes were differentially expressed in Group SiO2, in comparison with Control (FDR < 0.05). [file peerj-08-8684-s003.xlsx]

## Sheet: AgvsControl
Supplementary data 1. Differentially expressed genes by edgeR in Group Ag and Group SiO2
EntrezID	Description	logFC	logCPM	LR	PValue	FDR
178797	hypothetical protein	-4.28325	3.26253	385.887	6.50677e-86	1.21e-81
177754	Uncharacterized protein	-2.84048	3.89889	153.774	2.59539e-35	2.4132e-31
353395	Mitogen-activated protein kinase	2.6843	3.3905	131.863	1.6032e-30	9.93771e-27
187940	Fasting Induced Lipase	-2.4268	7.42356	103.399	2.74068e-24	1.27414e-20
180079	CystaTHionine gamma lyase	1.429	4.87414	102.482	4.35397e-24	1.61933e-20
173880	Mitogen-activated protein kinase	1.28885	6.0684	87.1938	9.8394e-21	2.70488e-17
175753	LONg	1.40767	5.99452	87.1261	1.01819e-20	2.70488e-17
3565680	fatty Acid CoA Synthetase family	2.3359	8.04153	84.5343	3.77609e-20	8.77751e-17
182378	Uncharacterized protein	6.167	0.851168	82.0326	1.3386e-19	2.76584e-16
6418730	hypothetical protein	1.61321	3.24969	79.1493	5.75888e-19	1.07092e-15
185779	pseudo	-1.60167	6.11945	76.1684	2.60477e-18	4.40349e-15
175049	hypothetical protein	-1.51369	4.79733	73.7382	8.91967e-18	1.38225e-14
180080	ARGinine Kinase	2.89065	1.9916	71.4689	2.81664e-17	4.0291e-14
179043	fatty Acid CoA Synthetase family	1.01049	6.32347	65.8251	4.92754e-16	6.54519e-13
3565413	COLlagen	-1.03205	7.37656	63.5771	1.54208e-15	1.91177e-12
6418795	hypothetical protein	1.25432	5.20553	63.0284	2.03745e-15	2.2383e-12
259628	hypothetical protein	1.99027	2.0474	63.02	2.0462e-15	2.2383e-12
186667	hypothetical protein	1.35591	5.67525	62.6688	2.44563e-15	2.5266e-12
179907	hypothetical protein	1.89144	2.96587	60.9765	5.7759e-15	5.65309e-12
180992	Acetoacetyl-CoA synthetase	1.13269	6.95138	58.4161	2.12147e-14	1.97255e-11
177152	C-type LECtin	-1.4171	4.07755	56.9001	4.58531e-14	4.0604e-11
173029	hypothetical protein	1.49031	4.70388	55.5867	8.94261e-14	7.55895e-11
188329	Galactosylgalactosylxylosylprotein 3-beta-glucuronosyltransferase	-2.79672	1.87875	54.7027	1.40212e-13	1.13365e-10
179599	bZIP transcription factor family	1.46964	4.19272	52.455	4.40219e-13	3.41096e-10
174190	AQuaPorin or aquaglyceroporin related	1.7413	6.75744	51.8114	6.10961e-13	4.54458e-10
173940	Acyl CoA DeHydrogenase	2.77564	0.247508	50.0866	1.47109e-12	1.05217e-09
174339	dietary restriction down regulated	1.77901	3.07345	49.2075	2.3027e-12	1.58596e-09
186143	Protein kreg-1	1.61844	2.35749	48.9473	2.62939e-12	1.72952e-09
189943	C-type LECtin	-1.41391	5.23882	48.8974	2.69714e-12	1.72952e-09
181073	Histone H1.3	-0.863525	7.48199	46.9891	7.13835e-12	4.42483e-09
3565125	hypothetical protein	-2.22622	1.16264	46.718	8.19732e-12	4.91734e-09
179430	Lysozyme-like protein 3	1.14946	3.86785	45.7981	1.31091e-11	7.61802e-09
6418729	hypothetical protein	2.0985	0.764021	45.2236	1.75775e-11	9.90517e-09
186279	pseudo	1.12841	4.98321	45.1339	1.8401e-11	1.00642e-08
3565521	Uncharacterized protein	1.2243	3.02526	44.9684	2.00237e-11	1.06389e-08
186113	Heat Shock Protein	1.03398	5.77724	44.5348	2.49882e-11	1.29078e-08
3565430	C-type LECtin	-1.64069	1.57481	43.6888	3.84977e-11	1.93487e-08
175063	hypothetical protein	-0.866954	4.4461	43.4358	4.38098e-11	2.14391e-08
3565534	Nematode Specific Peptide family, group C	-1.48276	3.83529	43.1063	5.18463e-11	2.47214e-08
187316	Fasting Induced Lipase	-1.65993	4.13222	42.8994	5.76278e-11	2.67911e-08
172358	Acyl CoA DeHydrogenase	3.11427	4.44953	42.3842	7.49928e-11	3.40138e-08
178543	hypothetical protein	-0.828395	4.96209	41.7855	1.01856e-10	4.50979e-08
24105169	hypothetical protein	4.0506	-0.756006	41.6399	1.09733e-10	4.74558e-08
182072	pseudo	1.17027	6.64237	41.3567	1.26836e-10	5.36057e-08
188260	Serpentine receptor class gamma-31	1.57248	3.03073	40.8929	1.60806e-10	6.64523e-08
191152	hypothetical protein	-1.10552	5.62742	40.6065	1.86184e-10	7.52669e-08
178638	Hydroxy-Acyl-CoA Dehydrogenase	1.28635	8.47728	40.3993	2.07018e-10	8.19086e-08
259559	Uncharacterized protein	0.92156	6.68809	39.5539	3.19134e-10	1.23638e-07
180884	Nicotinamide Nucleotide Transhydrogenase	-0.737263	6.12266	38.916	4.42442e-10	1.67911e-07
177320	Elongation of very long chain fatty acids protein	1.30857	8.11549	38.8663	4.53855e-10	1.68798e-07
181851	CYtochrome P450 family	-1.21423	4.81057	38.5448	5.35101e-10	1.94033e-07
182010	Uncharacterized protein	0.757007	4.59813	38.5178	5.42576e-10	1.94033e-07
178564	Downstream Of DAF-16 (regulated by DAF-16)	0.895786	7.18729	38.4061	5.74538e-10	2.01587e-07
171783	hypothetical protein	-1.09827	3.51333	38.1817	6.44525e-10	2.21955e-07
177751	Uncharacterized protein	-1.10304	6.87835	37.9079	7.41638e-10	2.50754e-07
260288	Uncharacterized protein	-1.13286	5.51262	37.57	8.81919e-10	2.9286e-07
181226	O-ACyltransferase homolog	1.1476	3.43324	37.4783	9.24343e-10	2.99914e-07
176713	hypothetical protein	-0.779123	5.44908	37.4551	9.35417e-10	2.99914e-07
175478	pseudo	1.11251	5.15555	37.2107	1.06033e-09	3.342e-07
178586	SeRPin	-0.81949	5.38296	37.1163	1.11288e-09	3.41954e-07
187034	hypothetical protein	-1.29149	1.7388	37.1009	1.1217e-09	3.41954e-07
186612	hypothetical protein	-1.37589	1.57804	36.8282	1.29012e-09	3.81333e-07
180162	Delta(9)-fatty-acid desaturase fat-5	1.28043	4.15733	36.8255	1.29189e-09	3.81333e-07
6418818	hypothetical protein	1.08806	3.24296	36.7232	1.36148e-09	3.95594e-07
259734	Nematode Specific Peptide family, group C	-1.55161	4.67693	36.299	1.6925e-09	4.8218e-07
172464	Dihydropyrimidinase 1	-0.855534	5.64725	36.2774	1.71133e-09	4.8218e-07
183381	Nuclear hormone receptor family member nhr-164	-2.0316	0.277648	36.1689	1.80934e-09	5.02186e-07
3565206	hypothetical protein	1.07615	7.48986	36.0513	1.92187e-09	5.25575e-07
182422	Uncharacterized protein	2.04583	0.275838	35.8651	2.11467e-09	5.6992e-07
186510	F-box B protein	-1.2544	2.18979	35.7963	2.19062e-09	5.81954e-07
181545	Histone H1.1	-0.813669	9.13321	35.7273	2.26961e-09	5.94446e-07
175446	hypothetical protein	1.34651	1.73754	35.4353	2.63665e-09	6.80987e-07
173300	Enoyl-CoA Hydratase	1.15529	6.94432	34.9639	3.3588e-09	8.55619e-07
175498	Microtubule-Associated Protein Homolog	0.981064	4.95321	34.8576	3.54718e-09	8.91398e-07
173198	SKN-1 Dependent Zygotic transcript	-1.19247	3.46292	34.6319	3.98328e-09	9.8764e-07
189772	hypothetical protein	1.00152	4.31379	34.0941	5.25108e-09	1.28486e-06
174929	C-type LECtin	-0.837266	6.54821	33.7988	6.11174e-09	1.47603e-06
179884	Serine palmitoyltransferase 3	0.601403	6.49942	33.5191	7.05666e-09	1.68238e-06
178495	SKp1 Related (ubiquitin ligase complex component)	-0.895086	4.0953	33.0816	8.83722e-09	2.08021e-06
189409	Seven TM Receptor	-1.94929	0.448666	32.8934	9.73528e-09	2.26297e-06
189963	hypothetical protein	1.97887	2.05099	32.8305	1.00557e-08	2.30859e-06
181462	Putative cytochrome P450 cyp-13B1	1.2033	2.78291	32.8053	1.01868e-08	2.31016e-06
181754	hypothetical protein	-0.780751	4.56734	32.7736	1.03542e-08	2.31984e-06
176417	hypothetical protein	1.13888	3.17901	32.5021	1.19065e-08	2.63586e-06
177972	Sugar transporter SWEET	-0.770127	5.52402	32.4473	1.2247e-08	2.67936e-06
181623	hypothetical protein	-0.710669	6.56118	32.2723	1.34012e-08	2.89778e-06
171992	hypothetical protein	0.819339	3.56816	32.0626	1.49282e-08	3.19086e-06
172327	PaNtothenate Kinase	1.04493	8.01793	31.7695	1.736e-08	3.66849e-06
178873	Heat shock 70 kDa protein F, mitochondrial	0.773644	8.87088	31.4834	2.01148e-08	4.20287e-06
191043	hypothetical protein	0.748246	5.00883	31.3465	2.1585e-08	4.45994e-06
177423	Uncharacterized protein	-0.8473	3.76579	31.3223	2.18557e-08	4.46625e-06
179138	Ferritin	-0.898834	5.94533	31.078	2.47864e-08	5.01008e-06
180092	hypothetical protein	1.38209	4.07105	30.8594	2.7742e-08	5.52102e-06
182083	hypothetical protein	-2.25627	0.734531	30.8478	2.79079e-08	5.52102e-06
180430	Intermediate filament protein ifd-2	0.630766	6.04835	30.8176	2.8346e-08	5.54865e-06
178447	SKp1 Related (ubiquitin ligase complex component)	-0.949722	4.07092	30.6472	3.09479e-08	5.99486e-06
177655	MEiotic SPindle	0.857166	6.52467	30.6028	3.16643e-08	6.07041e-06
13190936	hypothetical protein	1.08547	3.61879	30.4378	3.44736e-08	6.54154e-06
182559	hypothetical protein	-1.02338	3.72633	30.2042	3.88875e-08	7.25573e-06
172308	Very Early Transcript	-1.02175	3.96639	30.1977	3.90177e-08	7.25573e-06
181395	Nematode Specific Peptide family, group C	-1.03717	6.10219	30.1383	4.02311e-08	7.40731e-06
184226	hypothetical protein	-0.758441	4.50593	30.0278	4.25906e-08	7.68844e-06
172152	Piwi-like protein	0.88302	6.04955	30.0192	4.27786e-08	7.68844e-06
187183	CYtochrome P450 family	1.57788	1.15254	30.0093	4.29984e-08	7.68844e-06
186518	F-box B protein	-1.70109	0.45066	29.5625	5.41433e-08	9.58903e-06
178493	SKp1 Related (ubiquitin ligase complex component)	-0.980235	3.53757	29.4866	5.63054e-08	9.87788e-06
178840	SKp1 Related (ubiquitin ligase complex component)	-0.89357	5.29925	29.4462	5.74892e-08	9.99131e-06
173569	SKN-1 Dependent Zygotic transcript	-1.01328	3.81155	29.4155	5.84087e-08	1.00571e-05
182351	hypothetical protein	-0.914459	3.64001	29.3669	5.98928e-08	1.0218e-05
187144	Uncharacterized protein	0.727763	5.50317	29.271	6.29291e-08	1.06385e-05
178785	hypothetical protein	-0.986241	2.90774	29.228	6.43421e-08	1.07793e-05
174444	hypothetical protein	-0.614009	8.54025	29.1712	6.62569e-08	1.1001e-05
186272	pseudo	1.50545	1.86676	29.1114	6.83347e-08	1.11826e-05
172875	hypothetical protein	-1.05934	3.14361	29.1052	6.85534e-08	1.11826e-05
191525	DNA topoisomerase 2	1.003	4.42994	29.0396	7.09126e-08	1.14669e-05
176457	ATP-dependent DNA helicase chl-1	0.726242	5.26864	28.6359	8.73462e-08	1.40025e-05
178778	60S ribosomal protein L11-1	0.877115	8.86645	28.6014	8.89196e-08	1.41329e-05
184133	hypothetical protein	-3.33552	-0.826175	28.4965	9.38674e-08	1.47284e-05
180729	Putative ammonium transporter 1	0.745062	4.45541	28.4886	9.42506e-08	1.47284e-05
182238	hypothetical protein	1.48186	1.1938	28.3472	1.01392e-07	1.55741e-05
181034	Vitellogenin-1	0.795664	7.76894	28.3389	1.01828e-07	1.55741e-05
191685	Probable insulin-like peptide beta-type 1	-1.52128	2.03678	28.3323	1.02175e-07	1.55741e-05
188139	hypothetical protein	1.43289	2.70122	28.1008	1.15157e-07	1.74103e-05
178839	SKp1 Related (ubiquitin ligase complex component)	-0.840097	4.06223	28.0453	1.18511e-07	1.77728e-05
175316	Chaperonin homolog Hsp-60, mitochondrial	0.697278	6.95973	27.9345	1.25494e-07	1.85395e-05
175199	hypothetical protein	-0.625389	6.19744	27.9223	1.26287e-07	1.85395e-05
173821	hypothetical protein	-1.21267	2.62293	27.9173	1.26614e-07	1.85395e-05
177620	Uncharacterized protein	0.950868	3.97328	27.874	1.29478e-07	1.88108e-05
173191	Very Early Transcript	-1.23644	4.20334	27.8388	1.31856e-07	1.90076e-05
186240	Amino Acid Transporter	1.32091	1.9804	27.7325	1.393e-07	1.98342e-05
177042	Uncharacterized protein	0.984081	3.35267	27.7171	1.40418e-07	1.98342e-05
3565369	hypothetical protein	0.710666	5.75935	27.712	1.40789e-07	1.98342e-05
180410	hypothetical protein	-0.659473	7.23933	27.6944	1.42073e-07	1.98645e-05
4362999	hypothetical protein	1.83783	0.243115	27.603	1.48949e-07	2.06706e-05
189004	C-type LECtin	-0.962934	3.92441	27.5337	1.54379e-07	2.12571e-05
180337	CaeNaCin (Caenorhabditis bacteriocin)	-1.39098	4.46042	27.5202	1.55462e-07	2.12571e-05
13182103	hypothetical protein	2.45502	-0.870975	27.4436	1.61747e-07	2.18633e-05
176310	Cytoplasmic polyadenylation element-binding protein 1	0.845465	5.12706	27.4376	1.62247e-07	2.18633e-05
178532	Elongation of very long chain fatty acids protein	0.688325	7.9426	27.4135	1.64278e-07	2.19778e-05
173922	Putative RNA-binding protein EEED8.12	-1.21183	1.64975	27.1647	1.86834e-07	2.48169e-05
184388	SKN-1 Dependent Zygotic transcript	-2.50392	-1.17074	27.1207	1.91141e-07	2.5103e-05
259477	Chondroitin proteoglycan 7	-0.780358	5.86497	27.1152	1.91687e-07	2.5103e-05
187540	hypothetical protein	-0.82211	3.94363	27.0064	2.02787e-07	2.63708e-05
174125	SLC (SoLute Carrier) homolog	-0.628762	5.09403	26.9295	2.11014e-07	2.72502e-05
172414	ATP-dependent RNA helicase glh-1	0.920538	7.18394	26.8577	2.18999e-07	2.80863e-05
181884	hypothetical protein	1.14681	1.91807	26.5876	2.51855e-07	3.20788e-05
172276	hypothetical protein	0.784097	4.23876	26.5219	2.60567e-07	3.29626e-05
6418627	hypothetical protein	1.4933	2.09259	26.3309	2.87655e-07	3.61435e-05
184058	hypothetical protein	-0.884507	5.46175	26.2334	3.02548e-07	3.77596e-05
171627	RNP (RRM RNA binding domain) containing	0.858458	6.43019	26.1462	3.16512e-07	3.9239e-05
186723	hypothetical protein	1.52859	0.611014	26.1278	3.19555e-07	3.93539e-05
178246	Uncharacterized protein	-1.52101	2.00441	26.0865	3.26458e-07	3.99395e-05
185308	hypothetical protein	0.933978	4.93802	26.027	3.36679e-07	4.09208e-05
186640	BTB and MATH domain containing	1.15449	1.67657	25.9913	3.42968e-07	4.14145e-05
187195	hypothetical protein	1.01739	2.37412	25.9014	3.59306e-07	4.31075e-05
181341	Sex determination and dosage compensation protein sdc-2	-0.618024	5.84469	25.7189	3.94946e-07	4.70796e-05
172213	Kinesin-like protein	0.764295	6.1206	25.6921	4.00456e-07	4.74323e-05
191143	hypothetical protein	1.18713	1.24342	25.6667	4.05761e-07	4.77566e-05
178747	Intermediate filament protein ifc-1	-1.01752	6.25504	25.5245	4.36811e-07	5.09772e-05
177795	Calcium-transporting ATPase	-0.565337	8.05391	25.5165	4.38608e-07	5.09772e-05
183904	Nematode Specific Peptide family, group C	-1.61076	4.83874	25.4813	4.46685e-07	5.15935e-05
178496	SKp1 Related (ubiquitin ligase complex component)	-0.967659	3.36732	25.4589	4.51901e-07	5.18738e-05
175231	Peptidyl-prolyl cis-trans isomerase 6	-0.582733	5.85718	25.4135	4.62668e-07	5.27839e-05
181434	hypothetical protein	-1.13907	2.92214	25.3136	4.87272e-07	5.52519e-05
172090	Kinesin Cargo Adaptor	0.819954	5.3899	25.1641	5.26527e-07	5.93411e-05
173488	pseudo	-0.791952	4.26205	25.0924	5.46469e-07	6.12177e-05
259696	hypothetical protein	-1.20146	2.54998	25.0581	5.56278e-07	6.19434e-05
178509	Histidine-rich membrane protein KE4 homolog 1	0.812959	4.96467	24.9292	5.94741e-07	6.58322e-05
176938	Delta-like protein	-0.985483	3.73233	24.9142	5.99379e-07	6.5953e-05
183319	hypothetical protein	-1.53906	0.324466	24.8174	6.30271e-07	6.87929e-05
174411	hypothetical protein	0.940312	4.5503	24.8103	6.32587e-07	6.87929e-05
181392	Nematode Specific Peptide family, group C	-0.946378	6.15489	24.7988	6.36372e-07	6.88022e-05
174163	hypothetical protein	-0.93807	2.38765	24.6862	6.74644e-07	7.25183e-05
190915	hypothetical protein	-0.988084	2.81466	24.6418	6.90368e-07	7.37821e-05
177628	Histone H3	-1.25857	1.23206	24.49	7.4698e-07	7.93763e-05
186158	F-box B protein	-1.2102	2.13806	24.4773	7.51889e-07	7.94439e-05
183865	Nuclear Hormone Receptor family	0.904697	2.77787	24.4612	7.58226e-07	7.96609e-05
174376	AP-2 Transcription Factor family	-0.932983	3.26301	24.4387	7.67106e-07	8.01411e-05
191609	ADP-ribosylation factor 1-like 1	2.92918	1.11697	24.423	7.73414e-07	8.03486e-05
259577	Uncharacterized protein	0.909993	2.67674	24.3089	8.20597e-07	8.47768e-05
187905	hypothetical protein	0.902273	3.89987	24.2854	8.30671e-07	8.53435e-05
175602	hypothetical protein	0.776874	4.60482	24.2223	8.58327e-07	8.77003e-05
24104675	Vitellogenin-3	0.923328	6.52991	24.19	8.72848e-07	8.86966e-05
175500	Acetyl-coenzyme A synthetase	1.30962	9.62215	24.1684	8.827e-07	8.92103e-05
181426	hypothetical protein	-0.584136	5.65854	24.1384	8.96557e-07	9.01209e-05
173881	hypothetical protein	1.55784	1.30322	24.0611	9.3326e-07	9.33059e-05
185047	AP-2 Transcription Factor family	0.834924	4.49039	23.8429	1.04527e-06	0.000103946
184982	hypothetical protein	-1.32334	1.65384	23.7959	1.07111e-06	0.000105949
190631	hypothetical protein	2.61566	-1.17896	23.7856	1.07686e-06	0.000105953
188456	hypothetical protein	1.03556	3.12027	23.731	1.10786e-06	0.00010843
189544	hypothetical protein	1.53715	0.505801	23.6605	1.14917e-06	0.000111885
189628	F-box A protein	0.83111	3.97144	23.6032	1.18391e-06	0.000114667
3565693	Uncharacterized protein	0.969768	2.46217	23.5335	1.22757e-06	0.000118279
180996	Ectopic P Granules	-0.531181	6.6749	23.5027	1.24738e-06	0.000119529
174204	HAlF transporter (PGP related)	0.536872	6.27475	23.4934	1.2534e-06	0.000119529
179536	Aminopeptidase	-1.0055	3.87956	23.4701	1.26872e-06	0.000120373
181548	Nematode Specific Peptide family, group C	-1.03627	4.46161	23.4443	1.28581e-06	0.000121375
173255	hypothetical protein	-0.884819	2.88786	23.2997	1.38619e-06	0.00013019
178692	Lipid DroPlet localized protein	0.95499	7.80324	23.1163	1.5249e-06	0.000142497
175315	hypothetical protein	0.574026	6.09059	23.0551	1.57428e-06	0.000146377
175647	Atypical kinase coq-8, mitochondrial	0.583634	6.00509	22.982	1.63529e-06	0.000151116
173668	hypothetical protein	1.04728	4.8848	22.9747	1.6415e-06	0.000151116
183119	SKN-1 Dependent Zygotic transcript	-0.984557	2.68544	22.9482	1.66428e-06	0.000152458
173041	Translocase, Inner Mitochondrial Membrane	0.490483	6.81083	22.8513	1.75027e-06	0.000159375
177536	Chromo domain-containing protein cec-4	-0.576521	5.6207	22.8394	1.76118e-06	0.000159375
185671	Nematode Specific Peptide family, group C	-1.16069	4.93695	22.8347	1.7655e-06	0.000159375
173540	BTB (Broad/complex/Tramtrack/Bric a brac) domain protein	-1.14617	2.48547	22.7575	1.83782e-06	0.000165102
184065	Enoyl-CoA Hydratase	-0.818447	4.21469	22.6697	1.92374e-06	0.000171685
171778	Uterine Lumin Expressed/locailized	-0.765081	7.21203	22.6639	1.92956e-06	0.000171685
191247	hypothetical protein	-0.860658	2.92206	22.5918	2.00341e-06	0.000177039
181112	hypothetical protein	-0.663656	5.12911	22.5866	2.00878e-06	0.000177039
172993	Very Early Transcript	-0.903506	4.75008	22.5034	2.09769e-06	0.000184003
174641	hypothetical protein	0.735674	6.0115	22.4449	2.16261e-06	0.000188807
172560	hypothetical protein	0.830116	3.00256	22.2916	2.34232e-06	0.000203541
173921	Putative RNA-binding protein EEED8.4	-1.14553	1.90895	22.1735	2.49084e-06	0.000215441
188566	F-box B protein	-1.3796	0.695154	22.1619	2.50599e-06	0.000215747
172374	Meiotic spindle formation protein 2	0.696098	6.23148	22.1518	2.5192e-06	0.000215885
177591	Chromosome-Segregation and RNAi deficient	0.656284	7.50843	22.1359	2.54015e-06	0.000216682
172515	Piwi-like protein	0.712901	7.12837	22.0245	2.69197e-06	0.000227782
173196	Protein sepa-1	-1.06263	4.32137	22.0189	2.69983e-06	0.000227782
176582	Serine/threonine-protein kinase spe-6	1.02425	1.72486	22.0138	2.70702e-06	0.000227782
13184240	hypothetical protein	1.20775	3.31271	22.0006	2.72571e-06	0.000228321
190383	hypothetical protein	1.2758	1.42781	21.9443	2.80685e-06	0.000233135
173040	hypothetical protein	0.583854	6.23075	21.9433	2.80825e-06	0.000233135
176939	Delta-like protein	-1.07454	1.73944	21.921	2.84109e-06	0.000234813
172845	Zinc finger putative Transcription Factor family	-0.656915	5.9901	21.8727	2.91348e-06	0.000239731
186051	Serine/threonine-protein phosphatase	1.78763	-0.221814	21.8063	3.01601e-06	0.000247074
3565652	hypothetical protein	-1.49994	1.71113	21.7687	3.07569e-06	0.0002499
180646	Vitellogenin-4	1.15576	5.34727	21.7677	3.07739e-06	0.0002499
191515	NITrilase	-0.918399	3.54952	21.7455	3.11321e-06	0.00025171
266646	Serine palmitoyltransferase 2	0.577229	4.77795	21.6068	3.34668e-06	0.000269415
179997	hypothetical protein	0.744962	5.96307	21.59	3.37613e-06	0.000270614
191032	F-box A protein	-1.34801	1.44338	21.5781	3.39706e-06	0.000271123
184345	hypothetical protein	0.901007	2.9537	21.5221	3.49778e-06	0.000277969
266900	Serine/threonine-protein kinase plk-3	0.703864	7.1896	21.5047	3.52968e-06	0.00027931
171855	hypothetical protein	0.811062	4.16087	21.4894	3.55788e-06	0.000280349
181391	Nematode Specific Peptide family, group C	-0.942044	6.02091	21.3891	3.74888e-06	0.000293377
176585	Zinc finger putative Transcription Factor family	-0.642241	4.69823	21.3861	3.75477e-06	0.000293377
3565462	Uncharacterized protein	1.94947	-0.679045	21.372	3.7825e-06	0.000293801
187486	C-type LECtin	1.34318	1.52981	21.3673	3.7918e-06	0.000293801
173805	HMG	-0.514725	6.91929	21.2822	3.96404e-06	0.000305873
190660	hypothetical protein	-1.07736	1.49637	21.2207	4.09321e-06	0.000314141
3565985	INSulin related	1.50824	2.97001	21.2152	4.10499e-06	0.000314141
186237	hypothetical protein	1.18351	1.07381	21.1809	4.17905e-06	0.000318499
177241	Homolog Of ELAC2 (cancer susceptibility locus)	0.66815	6.582	21.0786	4.40824e-06	0.000334595
173500	hypothetical protein	0.638951	10.2094	21.0136	4.56038e-06	0.000344735
189654	C-type LECtin	-0.943815	2.45453	20.9941	4.60707e-06	0.000346855
183126	Infection Response Gene	1.66032	0.934376	20.9284	4.76776e-06	0.000357505
177857	alpha-1,2-Mannosidase	0.542658	5.67787	20.8686	4.9189e-06	0.000367357
179657	Kynurenine 3-monooxygenase	-0.591151	5.12992	20.8056	5.08352e-06	0.000378133
176078	Bromodomain Adjacent to Zinc finger domain, 2A/2B, homolog	-0.529105	6.11821	20.7712	5.17552e-06	0.000382405
186998	Insulin/EGF-Receptor L Domain protein	-1.25161	1.1884	20.7688	5.18209e-06	0.000382405
24104971	BTB and MATH domain-containing protein 34	1.41425	1.20008	20.7489	5.23611e-06	0.000384825
191450	Uncharacterized protein	0.856973	4.52443	20.7416	5.25627e-06	0.000384825
179136	Seven TM Receptor	1.70317	-0.179403	20.6866	5.40946e-06	0.000394488
186648	BTB and MATH domain containing	0.866856	2.8122	20.6513	5.50998e-06	0.000400248
175924	bZIP transcription factor 8	-0.63218	5.31855	20.6288	5.57498e-06	0.000403395
180486	DeHydrogenases, Short chain	0.623413	5.26421	20.6081	5.63568e-06	0.000406206
172666	MoRTal germline	0.715028	4.75233	20.5881	5.6949e-06	0.00040889
182405	hypothetical protein	-1.03338	4.45861	20.5734	5.73886e-06	0.000410461
188568	F-box B protein	-0.858983	2.72891	20.4299	6.18544e-06	0.000440707
186770	hypothetical protein	1.7524	-0.0109603	20.311	6.58196e-06	0.000467168
181257	BET (two bromodomains) family protein	-0.547327	7.30117	20.2693	6.72709e-06	0.000475654
179332	hypothetical protein	-0.554571	6.987	20.223	6.89198e-06	0.000484037
186843	hypothetical protein	3.08881	0.317045	20.2214	6.89772e-06	0.000484037
182246	hypothetical protein	-0.80762	2.32633	20.21	6.93902e-06	0.000485106
181899	hypothetical protein	-0.748222	4.32055	20.0519	7.53695e-06	0.000524933
178242	Uncharacterized protein	0.906882	3.11442	20.0386	7.58962e-06	0.000526158
260226	ASpartyl Protease	-0.905383	2.76556	20.0331	7.61112e-06	0.000526158
173262	hypothetical protein	-0.885973	3.58494	19.9925	7.77456e-06	0.000535466
192096	Tetraspanin-1	0.670947	4.3748	19.9772	7.83721e-06	0.000537789
181517	Probable beta-mannosidase	-0.584995	5.48232	19.9536	7.9345e-06	0.000542463
187045	Zinc metalloproteinase nas-3	1.30409	0.601288	19.9351	8.01148e-06	0.00054572
178494	SKp1 Related (ubiquitin ligase complex component)	-0.848267	3.51016	19.9123	8.10787e-06	0.00055027
184178	F-box B protein	-1.09257	1.26973	19.8482	8.38427e-06	0.000566277
191332	Prion-like-(Q/N-rich)-domain-bearing protein	-1.83732	-0.629162	19.8435	8.40462e-06	0.000566277
173756	hypothetical protein	0.766082	3.1065	19.7866	8.65888e-06	0.000581302
171941	ATP-dependent RNA helicase glh-4	0.755181	5.56957	19.7342	8.89965e-06	0.000593273
172771	hypothetical protein	-0.590345	6.45535	19.7283	8.92674e-06	0.000593273
176298	Protein CLASP-3	-0.561704	5.49942	19.7245	8.94469e-06	0.000593273
180466	hypothetical protein	-0.772268	5.93727	19.7202	8.96482e-06	0.000593273
174171	hypothetical protein	0.73388	3.70212	19.6984	9.06763e-06	0.000597949
177404	Uncharacterized protein	0.667479	5.19539	19.6593	9.25507e-06	0.000608153
171628	hypothetical protein	0.58491	5.00519	19.6434	9.33239e-06	0.000609705
190283	F-box C protein	0.739945	3.36958	19.641	9.34427e-06	0.000609705
184239	GRounDhog (hedgehog-like family)	-0.907589	4.17034	19.5925	9.58456e-06	0.000623197
172854	hypothetical protein	0.713651	6.1178	19.5535	9.78214e-06	0.000633828
178064	MEiosis-to-MItosis transition associated	0.65861	5.77661	19.53	9.90305e-06	0.000638086
179865	DAF-16/FOXO Controlled, germline Tumor affecting	1.21811	7.35004	19.5236	9.93656e-06	0.000638086
178477	Uncharacterized protein	-1.36378	0.884264	19.5208	9.9508e-06	0.000638086
181008	hypothetical protein	-0.649554	4.18175	19.4964	1.00787e-05	0.000644069
176061	ATP-dependent RNA helicase cgh-1	0.816529	9.68785	19.4466	1.03451e-05	0.00065883
172784	Kinesin-like protein	0.563447	6.28219	19.4204	1.0488e-05	0.00066565
172577	hypothetical protein	0.725539	5.18968	19.4041	1.0578e-05	0.000669079
184678	Uncharacterized protein	0.849077	4.65938	19.3751	1.07399e-05	0.000677013
175551	SUPpressor	-0.632665	9.25344	19.3673	1.0784e-05	0.0006775
191209	hypothetical protein	0.840391	6.24404	19.3507	1.08779e-05	0.000679933
178463	Histone-lysine N-methyltransferase set-26	-0.480494	6.94935	19.3475	1.08959e-05	0.000679933
175535	Heritable RNAi Deficient	0.783407	8.04321	19.2681	1.13585e-05	0.000706433
6418727	hypothetical protein	0.545892	6.21345	19.2405	1.15243e-05	0.000714356
174548	Probable succinyl-CoA:3-ketoacid coenzyme A transferase, mitochondrial	0.692092	7.41849	19.2308	1.15832e-05	0.000715617
181198	Probable galaptin lec-8	0.526088	8.35482	19.221	1.16427e-05	0.000716912
179628	Alcohol dehydrogenase 2	-1.10341	1.95691	19.1745	1.19299e-05	0.000732171
189002	pseudo	-2.05114	-0.978238	19.1073	1.23568e-05	0.000755882
178917	hypothetical protein	0.657712	5.93662	19.0593	1.26721e-05	0.000772621
183934	hypothetical protein	-0.565488	5.62015	19.0476	1.275e-05	0.000774835
176069	Homeobox protein ceh-13	-0.557306	4.81399	18.9995	1.30749e-05	0.000791992
177340	ForKHead transcription factor family	-0.4715	6.40785	18.9515	1.34083e-05	0.000809548
178550	hypothetical protein	-1.15774	1.90009	18.943	1.34684e-05	0.000810547
176963	Uncharacterized protein	0.850586	3.4772	18.9288	1.3569e-05	0.000813965
178372	Uncharacterized protein	-1.11436	3.4807	18.8362	1.42438e-05	0.000848984
173481	BTB (Broad/complex/Tramtrack/Bric a brac) domain protein	-0.860113	2.89399	18.8325	1.42717e-05	0.000848984
178338	T lineage defect, LePtoderan tail	-0.528247	5.90302	18.8301	1.42897e-05	0.000848984
181689	hypothetical protein	-0.467956	7.06726	18.818	1.43801e-05	0.000849028
188331	hypothetical protein	-1.23753	1.5668	18.8178	1.43818e-05	0.000849028
174932	Piwi-like protein	0.686148	6.28807	18.7872	1.46147e-05	0.000858737
182243	hypothetical protein	-0.589841	5.16125	18.7841	1.46386e-05	0.000858737
175811	Homeobox protein ceh-10	-0.762364	2.50138	18.7764	1.46974e-05	0.000859472
176035	hypothetical protein	0.686787	5.98918	18.7466	1.49289e-05	0.000870276
172027	hypothetical protein	0.520977	5.63704	18.7344	1.5025e-05	0.000873138
176230	5'-AMP-activated protein kinase catalytic subunit alpha-1	0.563608	5.21878	18.6945	1.53421e-05	0.000888792
177390	Histone H1.2	-0.558622	7.83803	18.6879	1.53959e-05	0.000889136
186641	pseudo	2.22549	-1.12413	18.6457	1.57399e-05	0.000903987
181557	hypothetical protein	-0.449848	5.93259	18.6445	1.57503e-05	0.000903987
178054	Uncharacterized protein	0.723667	7.09374	18.6107	1.60319e-05	0.000917322
178737	Downstream Of DAF-16 (regulated by DAF-16)	-0.585515	6.95098	18.598	1.61386e-05	0.000920596
187668	F-box C protein	-0.961454	3.03894	18.5336	1.66939e-05	0.000949355
174345	LIPaSe related	-0.961473	3.67199	18.5187	1.68249e-05	0.000953889
173051	Furin-like protease kpc-1	-0.538796	7.01849	18.5115	1.68885e-05	0.000954584
189994	hypothetical protein	0.672247	4.42908	18.4739	1.72246e-05	0.000970632
175449	GrpE protein homolog, mitochondrial	0.538837	5.38587	18.4212	1.77074e-05	0.000994822
181619	hypothetical protein	-0.76306	4.44171	18.4019	1.78881e-05	0.000999238
181003	COHesin family	-0.528027	6.14797	18.4013	1.78934e-05	0.000999238
13197055	Seven TM Receptor	-0.611447	5.20334	18.3304	1.85716e-05	0.001034
172532	Female germline-specific tumor suppressor gld-1	0.712847	8.5098	18.3161	1.87116e-05	0.00103861
175202	C.Elegans Chromodomain protein	-0.661147	5.32324	18.3106	1.87661e-05	0.00103861
172907	Probable arginine kinase ZC434.8	0.746125	6.71916	18.2973	1.88977e-05	0.00104279
188388	hypothetical protein	-0.621545	4.54681	18.2872	1.89981e-05	0.00104523
174310	hypothetical protein	0.603358	5.83576	18.2639	1.92321e-05	0.00105498
3565227	hypothetical protein	-1.48795	0.828704	18.2539	1.93326e-05	0.00105738
178065	CYtochrome P450 family	0.709696	5.64903	18.2323	1.95533e-05	0.00106632
180189	C-type LECtin	-1.21946	2.29184	18.2209	1.96706e-05	0.00106957
181259	Probable syndecan	-0.541543	7.48651	18.2141	1.9741e-05	0.00107027
180450	ABHydrolase Domain containing homolog	0.584751	5.07071	18.1913	1.99784e-05	0.00108
171987	hypothetical protein	-0.519875	5.40659	18.1712	2.01905e-05	0.00108767
186647	BTB and MATH domain containing	1.30808	0.922774	18.1668	2.02373e-05	0.00108767
181099	DumPY: shorter than wild-type	-1.01715	1.64958	18.1602	2.03081e-05	0.00108833
178818	COHesin family	0.819648	3.96976	18.1471	2.0448e-05	0.00109267
173755	hypothetical protein	0.624075	5.56166	18.1376	2.055e-05	0.00109498
180304	Serine/threonine-protein kinase chk-2	0.784121	2.5393	18.1103	2.08471e-05	0.00110724
190889	Serpentine Receptor, class V	-1.29304	0.732844	18.1055	2.08992e-05	0.00110724
175755	hypothetical protein	0.735809	4.78599	18.0977	2.09851e-05	0.00110863
188071	TransThyretin-Related family domain	1.85648	-0.258717	18.08	2.11815e-05	0.00111584
182442	Uncharacterized protein	1.55006	0.725244	18.0694	2.13001e-05	0.00111892
190674	Bestrophin homolog	-0.822052	3.26833	18.0592	2.14143e-05	0.00112175
191613	hypothetical protein	1.27447	0.4711	18.0442	2.1584e-05	0.00112746
178691	hypothetical protein	2.24682	-0.256854	17.9919	2.21845e-05	0.00115494
173269	S-adenosylmethionine decarboxylase beta chain	0.648673	7.0183	17.9839	2.22783e-05	0.00115494
180949	AuTophaGy (yeast Atg homolog)	-0.473791	7.5697	17.9823	2.22964e-05	0.00115494
181693	hypothetical protein	-0.930967	2.0222	17.9724	2.24128e-05	0.00115775
24104154	hypothetical protein	-0.854345	2.55284	17.9498	2.26804e-05	0.00116832
171768	Mitochondrial prohibitin complex protein 1	0.481696	7.12998	17.8769	2.35659e-05	0.00121022
188821	hypothetical protein	1.24331	0.596625	17.8723	2.36238e-05	0.00121022
183220	Uncharacterized protein	0.566271	6.54653	17.853	2.38637e-05	0.00121915
179716	hypothetical protein	-0.691707	3.30144	17.8395	2.40336e-05	0.00122446
175841	CDK5RAP1-like protein	0.508428	5.22035	17.8277	2.41841e-05	0.00122876
182256	hypothetical protein	0.959574	3.82967	17.8186	2.42991e-05	0.00123124
178205	Uncharacterized protein	-0.623576	5.3806	17.7957	2.4594e-05	0.0012428
174787	Neprilysin-1	-0.471436	6.02553	17.7594	2.50676e-05	0.0012633
177323	Uncharacterized protein	0.68298	5.56036	17.7497	2.51954e-05	0.00126631
178826	Neuropeptide-Like Protein	-0.610923	5.40548	17.736	2.53779e-05	0.00127204
181980	hypothetical protein	0.74475	2.80762	17.7307	2.54484e-05	0.0012721
183539	REgulator of Fusion	-0.684577	3.69306	17.7257	2.55159e-05	0.0012721
179156	CYtochrome P450 family	-0.736592	3.39026	17.6726	2.6238e-05	0.0013046
173069	DNA-(apurinic or apyrimidinic site) lyase	0.675319	5.22189	17.6563	2.64643e-05	0.00131235
186973	hypothetical protein	1.06586	2.215	17.6368	2.67358e-05	0.00132228
172604	hypothetical protein	0.657587	5.96706	17.6208	2.69617e-05	0.00132992
3565904	Nuclear Hormone Receptor family	-0.506365	5.4681	17.6119	2.70887e-05	0.00133137
3565378	Uncharacterized protein	0.988627	2.03738	17.6082	2.71415e-05	0.00133137
181215	Cystathionine Beta-Synthase	-0.498504	6.42201	17.6037	2.72059e-05	0.00133137
180887	hypothetical protein	-0.580917	4.59912	17.589	2.74164e-05	0.00133815
175405	hypothetical protein	0.971556	1.77125	17.5655	2.77584e-05	0.0013513
175351	hypothetical protein	-0.532048	4.72262	17.5316	2.82569e-05	0.00136852
13186579	hypothetical protein	0.950665	2.20736	17.5314	2.82594e-05	0.00136852
176332	Beta-1,4-mannosyltransferase bre-3	0.433214	6.28213	17.5098	2.85833e-05	0.00138061
171679	HMBOX (mammalian HoMeoBOX gene) homolog	-0.567924	4.40407	17.4535	2.94428e-05	0.00141713
191455	Tubulin alpha-8 chain	-1.82774	-0.184134	17.4503	2.94918e-05	0.00141713
190257	hypothetical protein	0.609493	4.2351	17.4335	2.9753e-05	0.0014238
173528	F-box B protein	-0.947661	1.67405	17.4316	2.97837e-05	0.0014238
177535	Uncharacterized protein	0.565925	4.9997	17.4137	3.00652e-05	0.00143357
174682	hypothetical protein	1.13676	0.659825	17.3942	3.03757e-05	0.00144467
175809	DNA polymerase	0.64217	4.63227	17.3631	3.08759e-05	0.00146472
188567	F-box B protein	-1.03681	1.55512	17.3305	3.14097e-05	0.00148378
183243	hypothetical protein	-0.524583	5.57588	17.3289	3.14374e-05	0.00148378
179839	hypothetical protein	0.684543	3.73736	17.3132	3.16979e-05	0.00148966
187955	UDP-glucuronosyltransferase	1.00463	1.91603	17.3117	3.17222e-05	0.00148966
172244	Cytoplasmic polyadenylation element-binding protein 3	0.661271	6.51841	17.2807	3.22441e-05	0.00151036
179484	UDP-glucose 6-dehydrogenase	0.558505	7.00199	17.2469	3.28229e-05	0.0015336
175441	Conserved regulator of innate immunity protein 3	0.519937	6.62293	17.214	3.33958e-05	0.00155646
190829	hypothetical protein	0.868727	2.69619	17.1894	3.38314e-05	0.00157282
187038	F-box B protein	-1.06846	0.852424	17.1712	3.41579e-05	0.00158404
182758	Helix Loop Helix	-0.71235	3.27787	17.1644	3.42808e-05	0.00158579
175248	Ubiquinol-Cytochrome c oxidoReductase complex	0.699917	6.07227	17.1371	3.47762e-05	0.00160471
175454	hypothetical protein	0.631838	4.25611	17.1279	3.49444e-05	0.00160848
181507	hypothetical protein	-0.474946	5.98407	17.1167	3.51522e-05	0.00161405
177242	Probable mitochondrial import inner membrane translocase subunit Tim17	0.434969	6.80837	17.0439	3.65256e-05	0.00167298
178772	Lysozyme-like protein 7	-0.755464	8.94149	17.0389	3.66216e-05	0.00167326
176452	SaPosin-like Protein family	-0.667903	6.97855	17.0271	3.68492e-05	0.00167639
177355	Probable S-adenosylmethionine synthase 3	0.500404	5.27967	17.0261	3.68704e-05	0.00167639
177193	Uncharacterized protein	1.35408	1.03051	17.0145	3.70964e-05	0.00167853
180756	Zinc finger putative Transcription Factor family	-0.634536	5.1333	17.0144	3.7098e-05	0.00167853
175895	Very-long-chain 3-oxooacyl-coA reductase let-767	0.557092	7.86094	16.9535	3.83057e-05	0.00172896
177281	IsoValeryl-CoA Dehydrogenase	0.479199	6.71466	16.93	3.87829e-05	0.00174375
175039	Histone deacetylase	0.541552	5.03434	16.9282	3.88209e-05	0.00174375
174687	hypothetical protein	-0.737729	7.43472	16.9167	3.9056e-05	0.00175009
172861	Protein argonaute	0.553896	6.02498	16.9107	3.91803e-05	0.00175028
173014	Zinc finger putative Transcription Factor family	-0.570961	6.76892	16.9074	3.92485e-05	0.00175028
179407	hypothetical protein	-1.05942	5.30301	16.8707	4.00155e-05	0.00178021
172103	Glutamate-gated chloride channel subunit beta	-0.837033	3.47719	16.8597	4.0247e-05	0.00178624
186289	F-box B protein	-1.71382	-0.740017	16.8337	4.08032e-05	0.00180485
179586	Deubiquitylating with USP/UBP and OTU domains	0.692629	4.57747	16.8285	4.09142e-05	0.00180485
259768	Uncharacterized F-box protein C27F2.7	0.745509	3.32725	16.8214	4.10682e-05	0.00180485
172072	Aspartate aminotransferase	0.571119	5.72305	16.8135	4.12384e-05	0.00180485
180590	C-type LECtin	-0.605848	4.96198	16.8131	4.12481e-05	0.00180485
179899	Metallothionein-2	0.657205	7.42668	16.813	4.12488e-05	0.00180485
189077	DGAT (acyl-CoA:DiacylGlycerol AcylTransferase) Related	0.688063	4.47129	16.8052	4.142e-05	0.00180809
353482	pseudo	1.06445	0.927875	16.77	4.21943e-05	0.00183758
3565912	hypothetical protein	-1.39186	0.879035	16.7612	4.23912e-05	0.00184184
174130	Putative transporter B0252.3	0.550644	4.71502	16.7076	4.3605e-05	0.00188283
174161	Acetyl-CoA acetyltransferase homolog, mitochondrial	0.481354	6.76337	16.7062	4.36378e-05	0.00188283
176992	Uncharacterized protein	-0.561386	5.9895	16.7062	4.36384e-05	0.00188283
174764	hypothetical protein	0.561946	6.30068	16.701	4.37584e-05	0.00188364
180485	Probable ATP-citrate synthase	0.511768	7.02422	16.6949	4.38982e-05	0.00188392
178684	Catechol-O-MethylTransferase family	2.17034	2.74484	16.6919	4.39676e-05	0.00188392
174128	ACEtyl-CoA Regulator	0.661541	8.9948	16.6787	4.42757e-05	0.00188823
183416	Uncharacterized protein	-1.11698	0.997986	16.676	4.43387e-05	0.00188823
176888	Uncharacterized protein	-0.72541	3.95837	16.6745	4.43728e-05	0.00188823
176570	Neuropeptide-Like Protein	-0.63479	4.78717	16.658	4.47617e-05	0.00190043
171653	Piwi-like protein	0.954148	2.05717	16.6534	4.487e-05	0.00190069
177794	Erythroid-Like Transcription factor family	-0.566735	5.15432	16.6307	4.54088e-05	0.00191914
174581	Tyrosine-protein kinase	0.638908	3.29457	16.5988	4.618e-05	0.00194731
186649	BTB and MATH domain containing	0.85477	1.97396	16.5746	4.67745e-05	0.00196791
259714	SaPosin-like Protein family	-0.588104	8.6751	16.5673	4.69535e-05	0.00197099
176965	Uncharacterized protein	0.638617	7.00118	16.5512	4.73541e-05	0.00198333
191842	Serpentine Receptor, class H	-2.87997	-1.94656	16.5346	4.77704e-05	0.00199139
187640	hypothetical protein	0.868771	1.99322	16.5298	4.78911e-05	0.00199139
188912	NADH Ubiquinone oxidoreductase Fe-S protein	0.626464	5.78059	16.5274	4.79518e-05	0.00199139
3565646	hypothetical protein	-1.07003	0.788226	16.5265	4.79749e-05	0.00199139
178018	Uncharacterized protein	0.6273	5.15904	16.5023	4.85909e-05	0.00201246
3565853	hypothetical protein	-0.948507	2.58049	16.4793	4.91845e-05	0.00203252
187601	Putative zinc finger protein R05D3.3	0.709914	2.56874	16.4718	4.93798e-05	0.00203607
184366	COLlagen	2.07793	1.4039	16.459	4.97141e-05	0.00204532
172015	Small Nuclear RibonucleoProtein homolog	0.68963	4.54698	16.4534	4.98617e-05	0.00204686
184284	Protein AAR2 homolog	0.605358	4.96118	16.435	5.03461e-05	0.00205858
172212	RMi1 (RMI1) Homolog	0.659723	4.77384	16.4342	5.03685e-05	0.00205858
179489	WD repeat-containing protein wdr-5.3	0.649414	5.56511	16.4172	5.08212e-05	0.00207252
176621	SKN-1 Dependent Zygotic transcript	-0.892808	2.17694	16.4099	5.10176e-05	0.00207598
179056	Peroxisomal Membrane Protein related	0.585295	4.18736	16.4045	5.11624e-05	0.00207733
181432	Nuclear hormone receptor family member nhr-25	-0.650426	5.32394	16.3992	5.13057e-05	0.00207856
174172	hypothetical protein	-0.967145	1.16754	16.3952	5.14162e-05	0.00207856
177956	Laminin-like protein epi-1	-0.579105	8.04095	16.3719	5.20499e-05	0.00209961
175597	MaLonyl CoA Decarboxylase	0.457088	5.04953	16.3596	5.23896e-05	0.00210874
183946	hypothetical protein	0.613803	4.58293	16.345	5.27962e-05	0.00212052
172067	hypothetical protein	0.530236	5.411	16.3346	5.30871e-05	0.0021276
182669	MATH (meprin-associated Traf homology) domain containing	1.42515	0.583931	16.328	5.32701e-05	0.00213035
180663	ForKHead transcription factor family	-0.736557	3.12396	16.3225	5.34269e-05	0.00213203
181750	SKN-1 Dependent Zygotic transcript	-0.988274	1.69338	16.2874	5.44242e-05	0.00216718
180579	Vang-like protein	-0.568997	5.01746	16.2708	5.49043e-05	0.00218163
3565987	hypothetical protein	0.959218	2.1078	16.2388	5.58379e-05	0.00221399
176341	Clustered mitochondria protein homolog	0.525793	7.56414	16.2275	5.61737e-05	0.00222257
172952	LAMinin related. See also lmb-	-0.614379	7.96239	16.1883	5.73466e-05	0.00226416
175537	Uncharacterized mitochondrial carrier C16C10.1	0.579474	4.81006	16.1714	5.78598e-05	0.00227958
180727	hypothetical protein	-0.570777	4.83087	16.1311	5.91051e-05	0.00232372
179618	hypothetical protein	0.581899	5.88233	16.1257	5.92746e-05	0.00232546
188362	Putative cytochrome P450 CYP13A7	-2.20368	-1.61266	16.0747	6.08912e-05	0.00238386
183036	C.Elegans Chromodomain protein	0.725828	4.0458	16.0707	6.10195e-05	0.00238386
177032	Uncharacterized protein	-0.67461	3.09035	16.0602	6.13605e-05	0.00239216
3565418	hypothetical protein	-1.86538	-1.05301	16.0506	6.16708e-05	0.00239923
171680	MADF domain transcription factor	0.635162	3.75993	16.0387	6.20601e-05	0.00240933
185567	hypothetical protein	4.68185	-2.45857	16.0289	6.23835e-05	0.00241507
181127	hypothetical protein	-0.429652	5.88045	16.0263	6.24676e-05	0.00241507
175095	SKN-1 Dependent Zygotic transcript	-1.02112	1.8947	16.0124	6.29281e-05	0.00242782
188846	DNA primase	0.672902	4.29958	15.9792	6.40406e-05	0.00246563
174569	Dorsal Intercalation and Elongation defect	-0.578362	6.60694	15.9589	6.47332e-05	0.00248715
189280	bZIP transcription factor family	0.467032	4.95776	15.9473	6.51316e-05	0.00249729
182915	Uncharacterized protein	0.771335	3.29678	15.928	6.57979e-05	0.00251765
178455	Uncharacterized protein	-0.624844	4.64677	15.9172	6.61757e-05	0.0025243
3565184	hypothetical protein	0.647268	3.73375	15.9152	6.62433e-05	0.0025243
190499	hypothetical protein	0.727783	3.00268	15.8836	6.73598e-05	0.0025616
13182956	hypothetical protein	-1.14813	1.12653	15.8763	6.76214e-05	0.0025663
184798	B3GNT1, Beta-1,3-N-acetylGucosamiNylTransferase 1, homolog	2.58586	-1.4687	15.8714	6.77949e-05	0.00256644
176961	COLlagen	-0.737313	7.30018	15.8685	6.79011e-05	0.00256644
3565545	Homeobox protein ceh-20	-0.489825	6.53273	15.8545	6.84026e-05	0.00258015
180734	Prion-like-(Q/N-rich)-domain-bearing protein	-0.466853	7.4753	15.8393	6.89543e-05	0.0025957
191245	hypothetical protein	-0.964381	6.21431	15.8343	6.91373e-05	0.00259733
183208	Uncharacterized protein	0.78877	2.64983	15.8136	6.9898e-05	0.00262061
172614	hypothetical protein	0.594959	5.6106	15.8093	7.00576e-05	0.00262131
189362	hypothetical protein	-1.36223	0.500087	15.7809	7.11156e-05	0.00265123
187409	Nuclear Hormone Receptor family	0.774649	2.95374	15.7802	7.11425e-05	0.00265123
175043	hypothetical protein	-0.66257	5.32856	15.766	7.16798e-05	0.00266592
177260	Uncharacterized protein	-1.04862	0.96409	15.74	7.26725e-05	0.00269744
175064	hypothetical protein	0.52782	4.41141	15.7255	7.32308e-05	0.00271275
178753	hypothetical protein	-0.899537	2.57544	15.698	7.43015e-05	0.00274694
180009	Zinc finger protein sdc-3	-0.468275	5.46383	15.6638	7.56581e-05	0.00279154
172786	hypothetical protein	0.630181	5.03293	15.6435	7.64735e-05	0.00281604
173868	hypothetical protein	0.577846	4.76946	15.6386	7.66724e-05	0.00281779
175398	TU elongation Factor (EF-Tu), Mitochondrial	0.476364	7.51734	15.6309	7.6985e-05	0.00282369
173782	hypothetical protein	0.700347	3.90255	15.6118	7.7768e-05	0.0028468
180274	hypothetical protein	0.635681	4.36982	15.5924	7.85681e-05	0.00286734
171930	Innexin	0.632441	4.68255	15.5908	7.86376e-05	0.00286734
175140	Organic Solute Transporter Alpha-like protein	0.508789	5.18901	15.5731	7.93778e-05	0.00288867
177406	PUF (Pumilio/FBF) domain-containing	0.617496	7.20458	15.5495	8.03729e-05	0.00291917
175564	Matrix non-peptidase homolog 1	-0.592117	6.37234	15.5435	8.06273e-05	0.0029227
183006	C-type LECtin	1.11749	0.535042	15.5358	8.09568e-05	0.00292894
179290	hypothetical protein	0.504625	7.00218	15.5197	8.16498e-05	0.00293968
177698	Uncharacterized protein	-0.681705	4.31131	15.5187	8.16927e-05	0.00293968
176519	Protein unc-119	-0.513448	4.81898	15.5179	8.17279e-05	0.00293968
171861	hypothetical protein	0.685216	2.7425	15.5129	8.19426e-05	0.00294171
172638	hypothetical protein	0.670589	7.52628	15.4861	8.31122e-05	0.00297304
179683	Elongation factor Ts, mitochondrial	0.470046	5.43981	15.4856	8.31352e-05	0.00297304
173738	Signal Element on Autosome	-0.449979	6.79235	15.4796	8.34014e-05	0.00297684
176376	Probable enoyl-CoA hydratase, mitochondrial	0.486796	6.78031	15.4642	8.40814e-05	0.00299494
182231	TransThyretin-Related family domain	-0.790688	3.39586	15.4609	8.42307e-05	0.00299494
176566	hypothetical protein	-0.570468	5.10521	15.4495	8.47407e-05	0.00300514
178192	Double-Strand Break factor	0.597714	5.15556	15.4472	8.48407e-05	0.00300514
259576	Uncharacterized protein	0.645414	4.95419	15.4182	8.61535e-05	0.00304185
172708	FIP (Fungus-Induced Protein) Related	2.49145	-1.67885	15.4171	8.62044e-05	0.00304185
184167	Acyl-coenzyme A oxidase	0.727831	2.79789	15.4113	8.64693e-05	0.00304542
173983	Major sperm protein 19/31/40/45/50/51/53/59/61/65/81/113/142	1.34042	2.66832	15.3948	8.72278e-05	0.00306633
180866	Innexin-3	-0.587951	7.62478	15.3508	8.92844e-05	0.0031327
180636	hypothetical protein	-0.556791	8.85046	15.3458	8.95215e-05	0.00313511
180475	3-phosphoinositide-dependent protein kinase 1	-0.470937	4.80589	15.3367	8.99509e-05	0.00314422
259316	hypothetical protein	1.25619	3.02868	15.3297	9.02839e-05	0.00314772
190573	Solute carrier organic anion transporter family member	-0.468405	5.77291	15.3275	9.03895e-05	0.00314772
178906	hypothetical protein	-0.553884	5.2046	15.2739	9.29926e-05	0.00323232
175717	Protein arginine N-methyltransferase 5	0.477327	6.16933	15.2601	9.36743e-05	0.00324497
185531	hypothetical protein	1.28355	0.0259607	15.2595	9.37055e-05	0.00324497
171652	Essential Meiotic Endonuclease	0.519181	5.08104	15.2494	9.42065e-05	0.00325625
181011	hypothetical protein	-0.573926	3.97782	15.2083	9.62797e-05	0.00332174
173468	Protein argonaute	-0.514419	7.02066	15.1867	9.73877e-05	0.00335375
176039	hypothetical protein	0.598193	4.35068	15.183	9.75792e-05	0.00335413
176205	hypothetical protein	-0.554091	4.44941	15.162	9.8667e-05	0.00338227
180578	hypothetical protein	-0.635757	7.3865	15.1585	9.88536e-05	0.00338227
173065	DNaJ domain (prokaryotic heat shock protein)	-0.494878	6.24383	15.1568	9.89435e-05	0.00338227
177461	P granule abnormality protein 1	0.668705	7.48216	15.1458	9.95201e-05	0.00339573
191419	hypothetical protein	1.2045	3.25531	15.1313	0.000100288	0.00341568
174273	PERMeable eggshell	0.716936	5.57855	15.1098	0.000101437	0.00344848
176776	PhosphatidylSerine SYnthase	0.68603	4.86069	15.0983	0.000102056	0.00346321
353386	Nematode Specific Peptide family, group D	1.32484	1.40246	15.0683	0.000103688	0.00351075
172316	hypothetical protein	1.35065	0.457862	15.0657	0.000103835	0.00351075
178961	Rho GTPase Activating protein	0.642099	6.02905	15.0422	0.000105135	0.00354824
175497	Probable UDP-N-acetylglucosamine pyrophosphorylase	0.517431	6.31165	15.0296	0.000105838	0.00356552
172436	hypothetical protein	0.685437	2.67386	15.0238	0.000106166	0.00356954
178225	Uncharacterized protein	1.0308	1.95334	15.0176	0.000106513	0.00356954
172175	hypothetical protein	0.683025	4.46946	15.0159	0.000106608	0.00356954
177321	Elongation of very long chain fatty acids protein 6	0.788246	9.19336	15.0138	0.000106725	0.00356954
185575	Putative T-box protein 11	-0.876071	2.21668	15.0048	0.000107235	0.00358016
191329	Nuclear Hormone Receptor family	-1.6652	-0.784795	14.9904	0.000108061	0.00360125
182658	MATH (meprin-associated Traf homology) domain containing	0.834115	3.66388	14.9737	0.00010902	0.00361548
177707	Uncharacterized protein	0.649442	5.06314	14.9731	0.000109055	0.00361548
172193	hypothetical protein	-0.616506	3.20452	14.9728	0.000109071	0.00361548
187079	Putative serine/threonine-protein kinase K06H7.1	1.78085	-0.289312	14.9578	0.00010994	0.0036378
183209	Glycine Rich Secreted Protein	-0.887956	1.84832	14.9519	0.000110289	0.00363954
177815	Caveolin	-0.572896	8.62597	14.9502	0.000110384	0.00363954
183497	Uncharacterized protein	1.14874	0.797899	14.9392	0.000111033	0.00364884
177070	Nicotinate phosphoribosyltransferase	0.543912	5.91152	14.9387	0.000111058	0.00364884
178867	hypothetical protein	0.677978	6.51868	14.926	0.000111811	0.00366708
353390	SKN-1 Dependent Zygotic transcript	-0.742388	2.46945	14.9201	0.000112163	0.0036702
187081	hypothetical protein	1.53246	0.400755	14.9178	0.000112301	0.0036702
176511	Kinesin-like protein	0.47639	6.36962	14.9097	0.00011278	0.0036794
186298	F-box B protein	-1.01886	0.823601	14.902	0.000113242	0.00368801
183862	Nuclear Hormone Receptor family	-0.55399	4.55269	14.8603	0.000115773	0.00376384
182354	Putative sodium/calcium exchanger 6	0.564227	4.94901	14.8528	0.000116234	0.00377224
176960	Uncharacterized protein	0.61905	3.33693	14.8445	0.000116747	0.00378226
175719	Tryptophan--tRNA ligase, mitochondrial	0.515056	5.39652	14.8412	0.000116952	0.00378234
173174	Neuropeptide-Like Protein	-0.591919	5.4398	14.8146	0.000118611	0.00382931
180355	hypothetical protein	-0.883745	2.1741	14.8102	0.000118891	0.00383171
184685	hypothetical protein	-0.71557	2.93231	14.804	0.000119279	0.00383757
188341	Hexosyltransferase	-0.93241	2.32663	14.796	0.00011979	0.00384736
178900	Systemic RNA interference defective protein 1	0.509254	5.50273	14.7789	0.000120882	0.00387571
178643	O-ACyltransferase homolog	0.724733	2.829	14.758	0.000122227	0.00390557
181132	hypothetical protein	-0.808377	2.81685	14.7579	0.000122233	0.00390557
181143	Transporter	-0.615657	3.40199	14.7398	0.000123413	0.00393652
180724	Protein Disulfide Isomerase	-0.524986	10.0152	14.7313	0.00012397	0.00394564
176576	BED-type zinc finger putative transcription factor	-0.419646	6.12987	14.7278	0.000124204	0.00394564
174712	Cytochrome OXidase assembly protein	0.492435	5.38141	14.7241	0.000124444	0.00394564
179519	hypothetical protein	0.483767	5.99332	14.7225	0.000124548	0.00394564
180518	ImmunoGlobulin-like Cell adhesion Molecule family	-0.588677	5.46202	14.7088	0.000125461	0.00396782
188686	hypothetical protein	0.607302	5.23027	14.6819	0.000127265	0.00401171
179399	hypothetical protein	-0.449006	6.99586	14.6791	0.000127449	0.00401171
177874	Major sperm protein 10/36/56/76	1.20229	3.61291	14.6784	0.000127496	0.00401171
179587	PMS (Post Meiotic Segregation) family	0.553054	5.69385	14.6587	0.00012884	0.00404713
172324	hypothetical protein	1.15324	3.2821	14.651	0.000129364	0.00405066
179425	60 kDa SS-A/Ro ribonucleoprotein homolog	0.42967	6.74322	14.6507	0.000129388	0.00405066
181421	Chromodomain-helicase-DNA-binding protein 3 homolog	-0.499751	7.46743	14.647	0.000129639	0.0040517
171974	Peptidylprolyl isomerase	-0.590265	5.79975	14.6242	0.000131217	0.00408842
188126	hypothetical protein	-0.773782	3.93213	14.6237	0.000131253	0.00408842
171894	hypothetical protein	0.606375	4.91005	14.6183	0.000131632	0.00409336
176591	C. Elegans Homeobox	0.693756	4.60172	14.6112	0.000132129	0.00410012
180102	hypothetical protein	0.574177	5.02017	14.6089	0.00013229	0.00410012
180981	P-GlycoProtein related	-0.565092	4.4619	14.5942	0.000133321	0.00412031
185853	C. Elegans Homeobox	-0.581822	4.39908	14.5912	0.000133534	0.00412031
173942	hypothetical protein	0.609483	4.57405	14.5902	0.000133607	0.00412031
173454	ARRestin Domain protein	-0.818065	4.37451	14.5486	0.000136593	0.00420544
185510	BTB and MATH domain containing	1.13543	0.790574	14.5447	0.000136874	0.00420712
180569	ImmunoGlobulin-like Cell adhesion Molecule family	-0.557924	7.83674	14.5392	0.000137274	0.00421245
173931	DAZ protein 1	0.659851	7.33333	14.5069	0.000139646	0.00427819
183083	pseudo	-0.813773	1.69875	14.4997	0.000140181	0.0042875
178648	hypothetical protein	0.539816	6.43958	14.4879	0.000141063	0.00430741
175649	GIPC (RGS-GAIP Interacting Protein C) homolog	1.13153	3.67389	14.4809	0.00014159	0.00431641
180403	Putative zinc finger protein B0310.2	-0.641288	3.55214	14.4687	0.000142509	0.00433097
185426	hypothetical protein	-1.13012	0.517138	14.4684	0.000142534	0.00433097
172117	ENhancer of Uncoordination	0.840611	1.92887	14.457	0.000143395	0.00435004
174956	Elongation factor G, mitochondrial	0.437339	6.7531	14.4503	0.000143905	0.00435839
187182	hypothetical protein	-0.545952	3.82302	14.44	0.000144698	0.00436259
176067	LIGase	0.472027	4.92145	14.4395	0.000144733	0.00436259
186678	hypothetical protein	0.582583	4.18299	14.4393	0.000144747	0.00436259
13198891	CYtochrome P450 family	0.705469	4.72472	14.4237	0.000145954	0.00439186
177081	Vitellogenin Regulating Protein	0.552748	7.16208	14.4181	0.00014639	0.00439784
173158	Cytokinesis, Apoptosis, RNA-associated	0.619669	9.08416	14.4123	0.000146836	0.00440414
259571	Him-Three Paralog	0.591486	5.77554	14.4049	0.000147416	0.00441441
3565594	SET (trithorax/polycomb) domain containing	0.620031	4.34803	14.4	0.000147802	0.00441884
187224	O-ACyltransferase homolog	0.618611	3.8386	14.3816	0.000149255	0.00445222
174602	hypothetical protein	0.452224	6.84868	14.3798	0.000149397	0.00445222
177454	Uncharacterized protein	0.576254	6.6501	14.3648	0.000150588	0.00448054
191742	Patterned Expression Site	0.89297	2.69847	14.3601	0.00015097	0.00448472
189023	hypothetical protein	2.03718	-1.41931	14.3444	0.000152234	0.00451507
174278	Spermathecal Physiology Variant	-0.50521	6.0238	14.3293	0.000153456	0.00454125
173050	protein KINase	-1.93555	-1.32581	14.3275	0.000153605	0.00454125
177865	GIPC (RGS-GAIP Interacting Protein C) homolog	1.12569	4.21981	14.3211	0.00015413	0.00454953
176273	Probable 26S proteasome regulatory subunit rpn-6.2	0.567198	3.67995	14.3103	0.000155018	0.00455766
178454	CCCH-type zinc finger putative transcription factor	-1.0242	1.03341	14.3058	0.000155386	0.00455766
176137	Homeobox protein prospero homolog 1	-0.620924	5.38923	14.3022	0.000155683	0.00455766
181181	hypothetical protein	-0.581394	7.03527	14.2994	0.000155912	0.00455766
173685	Neprilysin-11	-0.517274	4.92535	14.2988	0.000155962	0.00455766
181824	BTB and MATH domain containing	1.13978	0.42074	14.2983	0.00015601	0.00455766
179861	hypothetical protein	-0.542434	5.88913	14.2969	0.000156121	0.00455766
175390	hypothetical protein	0.400598	5.98805	14.2861	0.000157021	0.00457675
183502	Uncharacterized protein	1.31658	-0.0373797	14.2745	0.000157989	0.00459598
4363062	Galactosylgalactosylxylosylprotein 3-beta-glucuronosyltransferase	0.570084	4.9256	14.2723	0.000158175	0.00459598
174325	hypothetical protein	0.581579	6.22512	14.254	0.00015972	0.00463362
173426	PaTched Related family	-0.745389	2.6179	14.2353	0.000161317	0.00467266
182814	UDP-glucuronosyltransferase	-1.64524	-0.206394	14.2263	0.000162088	0.00468364
185557	hypothetical protein	-1.59529	0.159698	14.2235	0.000162328	0.00468364
185350	hypothetical protein	2.0155	0.306099	14.2221	0.000162451	0.00468364
187241	hypothetical protein	-0.799086	4.25014	14.2179	0.000162811	0.00468674
13187981	hypothetical protein	-1.40118	-0.0588092	14.1916	0.00016511	0.00474556
188716	hypothetical protein	-0.943825	2.75162	14.1735	0.000166704	0.00478398
190478	Uncharacterized protein	0.67822	4.68818	14.1585	0.000168039	0.00480027
174343	ACid Phosphatase family	-0.667355	2.7694	14.157	0.000168168	0.00480027
189277	hypothetical protein	0.821677	2.11756	14.1558	0.00016828	0.00480027
180980	Laminin-like protein lam-2	-0.513515	7.79775	14.155	0.000168347	0.00480027
174081	Probable Werner syndrome ATP-dependent helicase homolog 1	0.554499	5.57121	14.1526	0.000168562	0.00480027
186511	Sodium/hydrogen exchanger	1.37636	0.285994	14.1485	0.000168932	0.00480072
173743	Prion-like-(Q/N-rich)-domain-bearing protein	-0.511508	4.89335	14.1467	0.000169094	0.00480072
181530	C. Elegans Homeobox	-0.450689	5.16957	14.1151	0.000171955	0.00487394
191387	hypothetical protein	-0.581504	3.76297	14.1125	0.000172197	0.00487394
179956	hypothetical protein	-0.48305	4.87812	14.094	0.000173901	0.00491469
176282	Protein lin-12	-0.556586	4.76536	14.0862	0.000174618	0.00492376
172867	ERCC (DNA excision repair protein) homolog	0.451578	5.11486	14.0848	0.000174752	0.00492376
174044	Serine/threonine-protein kinase sma-6	-0.495152	5.21383	14.0729	0.000175861	0.00494684
177405	Him-Three Paralog	0.61987	5.03725	14.0682	0.0001763	0.00494684
183081	hypothetical protein	1.68193	-0.265125	14.0667	0.000176444	0.00494684
183956	MS Related Protein	1.25798	0.505159	14.0646	0.000176635	0.00494684
172354	hypothetical protein	0.512695	5.60483	14.044	0.000178583	0.00499387
187650	Serpentine Receptor, class U	-0.823027	1.75633	14.029	0.000180014	0.00502634
3564869	Purple acid phosphatase	2.47511	-1.83113	14.017	0.000181168	0.00504411
172170	hypothetical protein	0.640348	6.65021	14.0167	0.000181193	0.00504411
3565619	GRounDhog (hedgehog-like family)	-0.834963	3.62646	14.0078	0.000182052	0.00506045
178092	TransThyretin-Related family domain	-0.598942	7.75702	13.9904	0.000183746	0.00509369
179337	hypothetical protein	0.45501	5.50263	13.9893	0.000183858	0.00509369
176537	hypothetical protein	0.599153	3.92882	13.9871	0.00018407	0.00509369
189218	hypothetical protein	-0.663063	3.46443	13.9823	0.00018454	0.00509911
173597	C. Elegans Homeobox	-0.568204	4.68058	13.9794	0.000184822	0.00509933
172219	C. Elegans Y-box	0.65321	9.27702	13.9572	0.000187024	0.00515193
171905	Carboxylic ester hydrolase	-0.470957	5.57529	13.9546	0.000187282	0.00515193
172300	hypothetical protein	-0.579892	8.18268	13.9517	0.000187563	0.00515204
179281	Serpentine Receptor, class SX	-0.695553	3.72395	13.9459	0.000188143	0.00516033
178354	Uncharacterized protein	-0.433428	7.41024	13.9368	0.000189058	0.00516781
173831	F-box B protein	-0.581312	4.17769	13.9344	0.000189297	0.00516781
174293	hypothetical protein	-0.531321	6.07975	13.9326	0.000189483	0.00516781
174016	Fem-3 mRNA-binding factor 1	0.756888	3.99881	13.9303	0.000189718	0.00516781
177971	6-phosphogluconate dehydrogenase, decarboxylating	0.529341	7.30331	13.9294	0.000189805	0.00516781
192053	TAF (TBP-associated transcription factor) family	-0.618526	3.20247	13.9254	0.000190211	0.0051705
176398	Putative tricarboxylate transport protein, mitochondrial	0.526669	7.36042	13.9229	0.00019046	0.0051705
175923	hypothetical protein	0.575945	5.24353	13.9066	0.000192122	0.00520132
191319	hypothetical protein	-0.739956	2.53679	13.9063	0.000192155	0.00520132
172007	EGG sterile (unfertilizable)	0.619997	5.10859	13.8811	0.000194748	0.00525799
184218	C-type LECtin	-0.556964	3.66359	13.8805	0.000194814	0.00525799
191112	F-box B protein	-1.44883	-0.759302	13.8754	0.000195334	0.0052644
173757	F-box C protein	0.557626	4.63359	13.8698	0.000195919	0.00527253
184165	intestinal acid PHOsphatase	0.80284	3.15306	13.8649	0.000196429	0.00527862
181318	Innexin-2	-0.563	6.65674	13.8583	0.000197124	0.00528965
183212	Neurogenic differentiation factor 1	-0.612775	3.02292	13.8551	0.000197457	0.00529095
179239	hypothetical protein	-0.602454	4.13223	13.8466	0.000198351	0.005304
182679	hypothetical protein	1.00433	1.44695	13.8451	0.000198515	0.005304
179614	hypothetical protein	0.525035	5.55196	13.8265	0.000200492	0.00534913
175648	Major Sperm protein Domain containing	1.18727	3.20147	13.8216	0.000201016	0.00535517
181662	Protein lin-15B	-0.476044	6.10203	13.819	0.000201294	0.00535517
182755	Uncharacterized protein	1.05752	4.69342	13.8144	0.000201788	0.00536065
179461	Hypoxia-inducible factor prolyl hydroxylase	-0.408704	7.03496	13.8045	0.000202852	0.00538122
178210	Protein let-99	0.577752	5.83155	13.7908	0.000204333	0.00540984
187147	hypothetical protein	-0.85282	1.94238	13.7892	0.000204513	0.00540984
180562	hypothetical protein	-0.480271	5.17606	13.7802	0.000205496	0.00542812
186340	Uncharacterized protein	-0.72086	5.24	13.7494	0.000208884	0.0055098
172466	Adenylosuccinate lyase	0.419285	5.94388	13.742	0.000209713	0.00551515
171980	EGG sterile (unfertilizable)	0.579529	5.36793	13.7404	0.000209894	0.00551515
173645	hypothetical protein	-0.441847	5.752	13.7396	0.000209977	0.00551515
189130	hypothetical protein	0.845927	1.74882	13.7199	0.000212196	0.00556557
188527	hypothetical protein	-0.453745	6.00753	13.6978	0.000214704	0.00561754
173835	#N/A	1.30103	2.13188	13.6954	0.000214983	0.00561754
177694	#N/A	-0.849132	4.11284	13.6945	0.000215083	0.00561754
174942	Hydroxyacid-oxoacid transhydrogenase, mitochondrial	0.600345	6.37864	13.6669	0.000218265	0.00569265
181490	PIX (PAK (p21-activated kinase) Interacting eXchange factor) homolog	-0.426641	5.46949	13.6594	0.000219139	0.00569999
171640	hypothetical protein	0.671438	3.18108	13.6567	0.000219451	0.00569999
178774	UDP-GlucuronosylTransferase	0.475729	5.1795	13.6566	0.000219466	0.00569999
6418857	hypothetical protein	-0.700647	3.2172	13.6508	0.000220148	0.00570972
180122	MICOS complex subunit MIC60-2	0.585842	5.9215	13.6382	0.000221631	0.00573668
183500	Uncharacterized protein	0.572256	4.97059	13.6367	0.000221804	0.00573668
184872	hypothetical protein	0.852468	2.45085	13.6203	0.000223755	0.00577909
178742	hypothetical protein	0.880998	5.84248	13.6166	0.000224196	0.00578245
174833	hypothetical protein	0.579686	5.06366	13.6137	0.000224545	0.00578343
173635	Beta-1,3-galactosyltransferase sqv-2	0.50795	4.70445	13.6066	0.000225387	0.00578935
174879	hypothetical protein	-0.874805	1.36802	13.6066	0.000225397	0.00578935
181417	Glutamate 5-kinase	-0.539625	5.45639	13.6019	0.000225952	0.00579559
183517	MADF domain transcription factor	0.566168	4.01675	13.5959	0.000226681	0.00580627
174377	hypothetical protein	0.564155	4.8239	13.5796	0.000228657	0.00584884
188330	Nuclear hormone receptor family member nhr-217	-1.90458	-1.34494	13.5642	0.000230543	0.00588897
179073	COLlagen	0.562523	6.50812	13.5555	0.000231607	0.00590587
181990	hypothetical protein	0.540674	3.96075	13.5537	0.000231839	0.00590587
175518	PleXin Domain containing	-0.435921	5.29008	13.5453	0.00023287	0.00592401
24104726	1,2-dihydroxy-3-keto-5-methylthiopentene dioxygenase homolog 2	-0.834369	4.99317	13.5415	0.00023334	0.00592785
172429	hypothetical protein	0.517077	5.18454	13.535	0.00023416	0.00594056
187899	hypothetical protein	0.450698	4.71328	13.5282	0.000235003	0.00595385
180431	Dwarfin sma	-0.446021	6.03889	13.4981	0.000238805	0.00604194
184772	hypothetical protein	-1.2969	0.167011	13.4949	0.00023921	0.00604395
177887	Major sperm protein 38	1.43258	2.09482	13.4806	0.000241036	0.00608183
182254	Uncharacterized integrin beta-like protein C05D9.3	-0.538418	5.19137	13.473	0.000242025	0.00609844
180479	Zinc Finger Protein	-0.410493	5.62318	13.4704	0.00024235	0.00609844
175022	ARRestin Domain protein	0.501802	4.70742	13.4556	0.000244278	0.00613864
190278	Uncharacterized protein	0.668547	3.55622	13.4474	0.00024534	0.00615701
173372	Acidic leucine-rich nuclear phosphoprotein 32-related protein 1	-0.473713	6.30339	13.4418	0.000246083	0.00616733
180090	Major sperm protein	0.930187	3.09951	13.4329	0.000247256	0.00617519
171838	Serine/threonine-protein kinase plk-2	0.620194	5.77741	13.4328	0.00024726	0.00617519
184984	hypothetical protein	-1.31672	0.545874	13.4275	0.000247965	0.00617519
177994	CYclin B	0.5204	6.00405	13.4254	0.000248237	0.00617519
177702	Uncharacterized protein	0.391369	6.53376	13.4243	0.000248388	0.00617519
177817	Uncharacterized protein	0.536228	6.78079	13.4243	0.000248389	0.00617519
171611	Sulfhydryl oxidase	0.581225	3.967	13.4136	0.0002498	0.00620198
171932	Bifunctional lysine-specific demethylase and histidyl-hydroxylase NO66	-0.455647	5.09924	13.4049	0.000250969	0.00621703
173061	hypothetical protein	1.79944	0.23424	13.4017	0.000251395	0.00621703
173717	BTB and MATH domain containing	-0.973656	1.32705	13.4016	0.000251409	0.00621703
184213	Neuropeptide-Like Protein	-0.906702	1.98202	13.3922	0.00025268	0.00624014
189283	hypothetical protein	-0.903461	2.55011	13.3772	0.000254701	0.00628172
182678	hypothetical protein	0.729761	2.98654	13.3576	0.00025738	0.00633938
176564	hypothetical protein	-0.54032	4.5109	13.3544	0.000257821	0.00634186
177775	Isocitrate DeHydrogenase	0.527369	8.99753	13.3497	0.000258465	0.00634429
179298	Cuticle collagen 10	-0.772719	5.9109	13.3451	0.000259097	0.00634429
181136	Peptidyl-prolyl cis-trans isomerase 8	-0.416033	5.36103	13.3442	0.00025922	0.00634429
186900	Ubiquitin-Like Protease	0.852544	3.16018	13.3438	0.000259285	0.00634429
177635	Uncharacterized protein	0.454494	4.66774	13.3406	0.00025972	0.0063463
181053	NIP3 homolog	-0.39174	6.63349	13.3361	0.000260347	0.0063463
185463	Uncharacterized protein	-1.19371	0.34317	13.3358	0.000260391	0.0063463
179840	hypothetical protein	0.424281	6.29068	13.3298	0.000261224	0.00635828
13180558	hypothetical protein	1.1475	2.94198	13.3233	0.000262132	0.00637203
174829	HMG	0.528664	7.02039	13.3203	0.000262553	0.00637395
173888	Major sperm protein 49	1.1736	1.63284	13.3151	0.000263276	0.00638317
176438	hypothetical protein	0.522712	6.22573	13.3064	0.000264508	0.00640468
181651	hypothetical protein	-0.480323	4.46028	13.3031	0.000264964	0.00640738
175988	Twenty One u-rna (21U-RNA) biogenesis Fouled Up	0.68147	4.18408	13.2968	0.000265858	0.00642064
187032	F-box B protein	-0.911284	0.953226	13.2886	0.000267027	0.00644052
190096	hypothetical protein	-0.460724	4.94552	13.2819	0.000267986	0.00645526
181291	Myoblast growth factor receptor egl-15	-0.492405	5.61803	13.2789	0.000268411	0.00645715
176190	Chromo domain-containing protein cec-1	-0.396595	7.02777	13.2726	0.000269311	0.00647043
178953	hypothetical protein	0.640792	3.94078	13.268	0.00026998	0.00647814
180138	hypothetical protein	-1.24577	2.69255	13.2611	0.000270974	0.00648821
175823	RABaptiN (rab effector)	0.414123	5.43537	13.2602	0.000271098	0.00648821
24104698	CaDmium Responsive	-0.727759	1.97173	13.2426	0.000273656	0.006541
172489	hypothetical protein	1.16017	3.11535	13.2378	0.000274355	0.0065493
171928	hypothetical protein	0.563495	4.40877	13.2233	0.000276492	0.00659185
179841	BIR (baculovirus inhibitory repeat) family	0.615611	4.94254	13.2155	0.000277649	0.00659975
3896769	Uncharacterized protein	1.07708	1.28244	13.2146	0.000277775	0.00659975
177408	Uncharacterized protein	0.543907	4.20264	13.2138	0.000277888	0.00659975
24104671	Mitogen-activated protein kinase kinase kinase nsy-1	-0.409416	7.19449	13.2105	0.00027838	0.00660299
172592	hypothetical protein	-0.484618	4.1851	13.205	0.000279199	0.00661351
172186	hypothetical protein	0.756566	3.8376	13.2028	0.000279534	0.00661351
186666	hypothetical protein	1.3421	0.245126	13.1692	0.000284583	0.0067244
173708	hypothetical protein	-2.74836	-2.00628	13.156	0.000286595	0.00676123
178599	hypothetical protein	0.459799	5.09686	13.1542	0.000286869	0.00676123
187810	Tyrosine-protein kinase	0.805859	1.78598	13.1458	0.000288164	0.00678315
176854	COLlagen	0.557673	5.16598	13.1351	0.000289809	0.00680541
172524	Enhancer of Glp-One (glp-1)	0.571699	5.87894	13.1349	0.000289841	0.00680541
178320	PUF (Pumilio/FBF) domain-containing	0.575904	7.48426	13.12	0.000292157	0.00685113
173153	hypothetical protein	0.556672	5.88503	13.1112	0.000293536	0.00687482
175909	Protein let-756	-0.517665	4.8577	13.1041	0.000294647	0.00689215
181302	AristaLess (Drosophila homeodomain) Related	-0.526428	4.55198	13.0949	0.000296093	0.00691727
172918	Microtubule-Associated Protein Homolog	0.618022	6.41442	13.0715	0.000299826	0.00699139
176964	Uncharacterized protein	0.494835	5.18345	13.0668	0.000300572	0.00699139
175430	hypothetical protein	-0.438825	5.23231	13.0667	0.000300587	0.00699139
179568	hypothetical protein	-0.504327	7.34376	13.0655	0.000300792	0.00699139
179654	hypothetical protein	0.628804	5.13384	13.0633	0.000301145	0.00699139
177629	Uncharacterized protein	1.17416	3.08226	13.0427	0.000304473	0.00705983
173489	BTB (Broad/complex/Tramtrack/Bric a brac) domain protein	-0.713568	2.97782	13.0385	0.00030516	0.00706694
173286	hypothetical protein	0.594931	3.88282	13.036	0.000305568	0.00706759
187307	hypothetical protein	0.651516	3.38092	13.0284	0.000306796	0.00708717
189467	CYtochrome P450 family	0.622625	5.01318	13.0254	0.000307302	0.00709005
191276	hypothetical protein	1.27524	2.14328	13.0216	0.000307916	0.00709542
7040189	hypothetical protein	0.680896	4.55179	13.0123	0.000309447	0.00712188
180110	hypothetical protein	0.575267	5.19229	13.0059	0.000310507	0.00713042
183499	Uncharacterized protein	0.788438	3.566	13.0033	0.000310936	0.00713042
176583	Suppressor of spindle checkpoint defect 1	0.55736	5.28423	13.0031	0.000310968	0.00713042
185701	hypothetical protein	-1.21261	-0.313656	12.9753	0.00031563	0.00722236
174679	GLYcosylation related	-0.997102	2.09622	12.9716	0.000316247	0.00722236
187086	hypothetical protein	0.920598	1.31697	12.9704	0.000316446	0.00722236
187570	Putative UDP-glucuronosyltransferase ugt-47	0.555334	4.84351	12.969	0.000316685	0.00722236
172660	CalPoNin	0.496079	7.05974	12.9676	0.00031692	0.00722236
173844	Major sperm protein 33	1.16439	2.74147	12.9494	0.000320021	0.00728409
185603	Nuclear Hormone Receptor family	3.3784	-2.38168	12.9239	0.000324414	0.00737506
187798	Uncharacterized protein	0.771659	3.80246	12.9182	0.000325409	0.00738572
180587	SVPGVLRF-amide 3	-0.707018	5.73017	12.9166	0.000325677	0.00738572
181956	F-box A protein	-1.04242	1.33278	12.9104	0.000326755	0.00740115
178574	hypothetical protein	-0.730524	6.40763	12.8923	0.00032993	0.00746396
175579	hypothetical protein	0.898253	1.93855	12.8774	0.000332577	0.00749385
266825	Probable histone-lysine N-methyltransferase lin-59	-0.401314	7.40984	12.8773	0.000332596	0.00749385
174593	NEPrilysin metallopeptidase family	-0.512379	5.35212	12.8772	0.000332603	0.00749385
174921	hypothetical protein	-0.927877	1.74467	12.874	0.000333174	0.00749385
184131	hypothetical protein	-1.39987	-0.263324	12.8735	0.000333266	0.00749385
177995	Uncharacterized protein	0.596014	3.5092	12.871	0.000333715	0.00749488
266829	Adenylyl cyclase-associated protein	0.563261	5.5225	12.8649	0.000334809	0.00751039
184108	SUppressor of Elongation defect	-0.596652	4.0382	12.8624	0.000335251	0.00751124
191712	Major sperm protein 152	1.25694	2.16368	12.8507	0.000337359	0.00754938
175776	X chromosome NonDisjunction factor	0.613239	6.31887	12.8326	0.000340628	0.00761336
175087	Daf-16-Dependent Longevity (WT but not daf-16 lifespan increased)	0.464049	4.61593	12.8292	0.000341259	0.00761704
172819	hypothetical protein	1.06517	3.14791	12.8272	0.000341612	0.00761704
181529	Homeobox protein ceh-36	-0.71895	2.70331	12.8189	0.000343139	0.00764192
189008	hypothetical protein	0.642407	3.12678	12.8098	0.000344799	0.00766972
190332	hypothetical protein	0.692403	3.0334	12.8023	0.00034619	0.00768789
181719	ALG-1 INteracting protein	-0.449062	8.35761	12.801	0.000346443	0.00768789
177518	Uncharacterized protein	0.841155	3.07928	12.7869	0.000349058	0.00772983
181712	hypothetical protein	-0.446452	5.03413	12.7863	0.000349164	0.00772983
181457	MaX-Like	0.644903	4.65576	12.7731	0.00035164	0.00777079
181549	Nematode Specific Peptide family, group C	-0.698613	6.01146	12.772	0.00035185	0.00777079
181561	Synaptogenesis protein syg-2	-0.578091	6.042	12.7645	0.000353253	0.00779253
180560	Nuclear hormone receptor family member nhr-40	-0.448789	5.87808	12.7447	0.000357024	0.00785902
191294	Major sperm protein	1.56548	-0.0894988	12.7442	0.000357113	0.00785902
172617	60S ribosomal protein L23a 2	0.414186	8.86062	12.7361	0.000358671	0.00788397
185559	hypothetical protein	-1.84776	-1.19939	12.7278	0.000360258	0.00790952
181414	Regulator of G protein Signaling	-0.511255	4.09818	12.7212	0.000361538	0.00792826
189157	hypothetical protein	-0.706924	2.5612	12.7153	0.00036267	0.00794372
180398	hypothetical protein	-0.397558	5.94511	12.7104	0.000363632	0.00795532
179182	hypothetical protein	-0.547771	5.95366	12.7082	0.000364056	0.00795532
3565825	hypothetical protein	1.15877	1.30645	12.7049	0.000364698	0.00795874
176221	Vacuolar protein sorting-associated protein 33A	0.409543	5.41272	12.703	0.000365068	0.00795874
24104404	Uncharacterized protein	1.24385	2.43408	12.6929	0.00036705	0.00799258
4926914	hypothetical protein	0.526112	4.31976	12.6832	0.000368958	0.00802473
174503	hypothetical protein	-0.464872	6.52887	12.6781	0.000369973	0.0080374
171915	human SPG (spastic paraplegia)	0.446173	6.32151	12.6574	0.000374092	0.00811741
181120	hypothetical protein	-0.443195	5.09356	12.6485	0.000375872	0.00814652
173678	BTB and MATH domain containing	0.525098	4.49037	12.6273	0.000380156	0.00822979
176373	Eukaryotic translation initiation factor 5A	0.600038	8.15273	12.6214	0.00038135	0.00824602
178376	InterLeukin Cytokine Receptor related	-0.538315	4.22285	12.6154	0.000382587	0.00825308
184161	Serpentine Receptor, class X	-4.06017	-2.68262	12.6137	0.000382923	0.00825308
176976	Uncharacterized protein	0.483434	5.35984	12.6127	0.000383128	0.00825308
181052	TropoNin T	-0.48684	6.62457	12.6112	0.000383451	0.00825308
175083	hypothetical protein	0.519798	5.20335	12.6086	0.000383975	0.0082548
4927063	hypothetical protein	-0.479575	4.70299	12.6039	0.000384934	0.00826585
181211	PhosphatidylSerine SYnthase	-0.407012	5.71798	12.5989	0.000385968	0.00827851
179173	hypothetical protein	-0.661343	3.58197	12.5933	0.000387129	0.00829384
172470	Zinc finger putative Transcription Factor family	0.577083	5.47368	12.5863	0.000388582	0.00831447
259362	SaPosin-like Protein family	1.02105	4.35201	12.5844	0.000388986	0.00831447
172142	hypothetical protein	0.591402	5.02073	12.5757	0.000390801	0.00834368
177793	Amino Acid Transporter	-0.408168	5.26265	12.5659	0.00039284	0.00837759
178768	Frizzled-2	-0.570348	5.60011	12.5629	0.000393485	0.00838173
190280	Uncharacterized protein	0.817186	1.66982	12.5527	0.000395629	0.0084123
181764	PaTched Related family	-0.526307	5.2041	12.5505	0.000396106	0.0084123
183881	F-box A protein	-0.559923	3.5136	12.5497	0.000396277	0.0084123
188308	pseudo	-1.8742	-1.18627	12.5446	0.000397343	0.0084253
187019	hypothetical protein	1.00823	1.49166	12.5419	0.00039793	0.00842814
177176	dietary restriction down regulated	1.54737	0.672318	12.5316	0.000400131	0.00846511
2565701	cytochrome c oxidase subunit III	-0.590887	11.1939	12.5239	0.000401782	0.00848506
172411	hypothetical protein	0.582365	5.9775	12.5229	0.000401986	0.00848506
175633	ENhancer of Uncoordination	0.66688	3.23196	12.5166	0.000403344	0.00850407
176291	Probable vesicular glutamate transporter eat-4	-0.652497	3.64023	12.5142	0.000403868	0.00850546
188703	RNA-binding protein asd-2	-0.494514	6.233	12.5097	0.000404841	0.00851424
172636	hypothetical protein	-0.541995	5.23061	12.5081	0.0004052	0.00851424
181283	DystroGlycaN	-0.545553	6.80786	12.4943	0.000408204	0.00856767
175144	hypothetical protein	-0.815786	2.86984	12.4856	0.000410106	0.0085979
174896	hypothetical protein	2.18373	0.715018	12.4692	0.00041371	0.00866369
191649	Receptor-type guanylate cyclase gcy-17	-1.27889	-0.273581	12.4565	0.000416545	0.00871324
4363043	F-box B protein	-0.861758	1.66764	12.4423	0.000419709	0.00876957
6418630	hypothetical protein	-0.956276	1.67188	12.4226	0.000424169	0.00885281
179925	NEPrilysin metallopeptidase family	-0.48852	4.92359	12.4189	0.000425002	0.00886024
181288	PeroXidasiN (Drosophila peroxidase) homolog	-0.572399	4.46295	12.4137	0.000426205	0.00887537
172991	hypothetical protein	-0.941748	1.92264	12.4094	0.000427167	0.00888545
186308	hypothetical protein	-0.580329	3.29208	12.4054	0.000428094	0.00889478
13188264	hypothetical protein	-1.18397	0.156436	12.3944	0.000430613	0.00893713
172425	hypothetical protein	0.600022	4.24945	12.39	0.000431631	0.00894828
172289	MS Related Protein	1.19155	3.44643	12.3793	0.000434109	0.00898963
180856	TBC (Tre-2/Bub2/Cdc16) domain family	-0.649659	3.09398	12.3711	0.000436035	0.00901946
173890	Major sperm protein 19/31/40/45/50/51/53/59/61/65/81/113/142	1.19221	2.44849	12.3624	0.000438066	0.00905142
173830	Major sperm protein 19/31/40/45/50/51/53/59/61/65/81/113/142	1.24561	3.09647	12.351	0.000440742	0.00908265
174532	CUTiclin-Like	-0.702719	4.18967	12.3501	0.000440961	0.00908265
174196	hypothetical protein	0.587055	5.10127	12.3498	0.000441043	0.00908265
181194	Mediator of RNA polymerase II transcription subunit 12	-0.407133	7.42067	12.3468	0.00044174	0.00908662
180829	hypothetical protein	-0.551606	4.43643	12.3448	0.000442213	0.00908662
173986	TBC (Tre-2/Bub2/Cdc16) domain family	0.452592	6.49885	12.3425	0.000442762	0.00908786
172427	hypothetical protein	0.430371	5.27274	12.3369	0.000444094	0.00909602
176755	Eukaryotic translation initiation factor 4E-1	0.398631	6.70258	12.3367	0.000444138	0.00909602
178536	Eukaryotic translation initiation factor 4E-3	0.520896	7.02876	12.3232	0.000447357	0.00915188
182411	F-box B protein	-0.807468	1.70286	12.31	0.000450545	0.00920695
181028	hypothetical protein	0.650777	3.40339	12.307	0.000451264	0.00921154
13220478	hypothetical protein	1.07403	0.921599	12.2966	0.000453788	0.0092529
177290	Uncharacterized protein	1.30467	0.572078	12.2941	0.000454392	0.00925505
185899	Serpentine Receptor, class M	-1.53586	-0.967484	12.2886	0.000455739	0.00927235
185115	BTB and MATH domain-containing protein 45	0.934099	0.957678	12.2817	0.000457423	0.00929643
175021	ARRestin Domain protein	-0.574537	4.55986	12.2789	0.000458108	0.00929972
178967	hypothetical protein	0.685172	4.54983	12.277	0.000458585	0.00929972
175302	hypothetical protein	-0.585692	3.71975	12.2745	0.000459198	0.00930202
171947	hypothetical protein	1.4828	0.536294	12.2652	0.000461481	0.00933809
182509	Mtor (MTOR) associated protein, LST8 homolog	0.397543	5.47742	12.2601	0.000462757	0.00934357
184687	ETS class transcription factor	-0.838471	1.38546	12.2601	0.000462757	0.00934357
191270	hypothetical protein	4.2559	-2.63411	12.2573	0.000463438	0.00934718
176101	Mitochondrial import receptor subunit TOM7 homolog	0.494212	4.98923	12.2502	0.000465203	0.0093726
173583	Protein-tyrosine-phosphatase	1.04954	1.29265	12.2229	0.000472073	0.00950072
171929	Innexin	0.577351	5.76347	12.2199	0.000472827	0.00950562
177948	Zinc finger In Meiosis	0.542092	5.04815	12.2087	0.000475677	0.00955257
174140	Probable very-long-chain enoyl-CoA reductase art-1	0.465151	7.41431	12.1964	0.000478806	0.00960504
3565285	Protein containing ALS2cr12 (ALS2CR12) signature	-1.04684	1.06095	12.1896	0.000480568	0.00962946
177462	High Incidence of Males (increased X chromosome loss)	0.613376	5.74676	12.1877	0.000481059	0.00962946
173254	hypothetical protein	-0.802961	1.58649	12.1824	0.000482431	0.00963763
173977	hypothetical protein	-0.442344	4.79097	12.1804	0.000482938	0.00963763
180001	Heritable RNAi Deficient	0.492212	5.27013	12.1801	0.000483022	0.00963763
184063	Endo-b-N-acetylGlucosaminidase	0.437075	4.58788	12.1679	0.000486191	0.00969048
177612	Fatty Acid Amide Hydrolase homolog	0.483284	5.07444	12.1585	0.000488649	0.00972376
173822	hypothetical protein	0.58866	5.19049	12.1575	0.000488907	0.00972376
182122	hypothetical protein	1.09316	1.26015	12.1496	0.000490991	0.00975477
181484	NeuroLiGin family	-0.575134	5.07226	12.1366	0.000494423	0.00980418
172846	STeroidogenic acute Regulatory protein Like	0.429954	5.52023	12.1362	0.000494532	0.00980418
177835	Sperm-Specific family, class Q	0.982272	3.53724	12.134	0.000495096	0.00980491
189689	hypothetical protein	1.27195	0.0733107	12.1246	0.000497622	0.00984371
177614	Uncharacterized protein	1.29678	1.25081	12.1227	0.000498114	0.00984371
174327	Tyrosine decarboxylase	0.487228	7.11688	12.1186	0.000499203	0.00984736
178456	Uncharacterized protein	-0.515787	4.719	12.1148	0.00050022	0.00984736
175388	CrossOver Site Associated	0.612943	3.61471	12.1133	0.000500625	0.00984736
186223	Histone H3-like centromeric protein cpar-1	0.566737	4.63533	12.1111	0.000501218	0.00984736
185454	Transmembrane and TPR repeat-containing protein F38B6.6	-0.63823	3.96431	12.1109	0.000501283	0.00984736
174540	ARRestin Domain protein	-0.603244	4.22067	12.1102	0.000501476	0.00984736
174731	Cuticle collagen sqt-1	1.68154	1.10453	12.1074	0.000502226	0.00985169
171912	Separin homolog sep-1	0.524619	6.48881	12.1021	0.000503646	0.00986913
178476	DAF-16/FOXO Controlled, germline Tumor affecting	-0.963547	0.844764	12.0858	0.000508069	0.00994531
3564781	hypothetical protein	-0.402095	7.36542	12.0795	0.00050978	0.00996831
181327	P-GlycoProtein related	-0.682445	2.65827	12.0761	0.00051072	0.00997621
180555	Synaptogenesis protein syg-1	-0.516781	5.02589	12.0705	0.000512268	0.00999595
180308	hypothetical protein	0.447588	4.40935	12.061	0.00051487	0.0100362
175665	Enhanced RNAI (RNA interference)	0.423699	5.94342	12.0587	0.00051552	0.0100383
173111	C-type LECtin	-0.646188	2.77232	12.0561	0.000516219	0.0100414
178677	fatty Acid CoA Synthetase family	-0.5153	5.09786	12.0519	0.000517386	0.0100536
178903	Activated in Blocked Unfolded protein response	3.826	-2.13594	12.0452	0.000519254	0.0100552
175428	FERM domain (protein4.1-ezrin-radixin-moesin) family	-0.506084	4.15661	12.0449	0.000519348	0.0100552
174672	Probable GMP synthase [glutamine-hydrolyzing]	0.383667	6.539	12.0439	0.000519616	0.0100552
4363074	Uncharacterized protein	0.775124	1.87235	12.0439	0.000519628	0.0100552
175408	hypothetical protein	-0.55612	4.49754	12.041	0.000520442	0.0100584
191205	Nuclear Hormone Receptor family	-2.75018	-2.27158	12.0394	0.000520878	0.0100584
174513	hypothetical protein	-1.0512	1.26643	12.0293	0.000523704	0.0100837
184533	Ligand-Gated ion Channel	-0.531052	6.51535	12.029	0.000523802	0.0100837
188350	CYtochrome P450 family	-0.511784	4.93015	12.0289	0.000523814	0.0100837
187890	TransThyretin-Related family domain	-0.767027	3.33346	12.0264	0.000524534	0.0100871
177334	Netrin receptor unc-5	-0.477522	5.95498	12.019	0.000526614	0.0101166
177088	Aminopeptidase	-0.535945	5.30265	12.0105	0.000529019	0.0101524
180326	Protein arginine N-methyltransferase 1	0.404963	8.0956	12.0034	0.000531049	0.0101808
172013	PAZ/PIWI domain-containing	0.520962	5.75927	11.9992	0.000532232	0.010193
190666	Putative complexin-1	-0.558621	4.3391	11.995	0.000533427	0.0102054
180147	SKN-1 Dependent Zygotic transcript	-0.922189	0.959117	11.991	0.000534574	0.0102079
187510	EGG sterile (unfertilizable)	0.566443	6.96226	11.9907	0.000534658	0.0102079
187876	F-box B protein	-0.864669	1.27266	11.9829	0.000536923	0.0102406
181543	JuMonJi (transcription factor) Domain protein	-0.629719	4.11619	11.9763	0.000538802	0.010266
174880	hypothetical protein	-0.914837	1.07954	11.9685	0.000541088	0.0102891
178120	Protein let-653	-0.596572	4.89665	11.9683	0.000541122	0.0102891
179795	ATP-citrate synthase	0.538694	7.35907	11.9623	0.000542871	0.0103019
173190	hypothetical protein	-0.638577	2.94669	11.9622	0.000542904	0.0103019
180532	Pharyngeal Enhancer Binding	-0.468512	5.17248	11.957	0.000544415	0.0103077
191378	hypothetical protein	-1.11029	-0.0331573	11.9555	0.000544875	0.0103077
178898	hypothetical protein	0.422106	5.3424	11.9555	0.000544876	0.0103077
176790	hypothetical protein	-0.424518	5.26648	11.9533	0.000545519	0.0103094
177685	Kinesin-Like Protein	-0.423305	6.31365	11.9481	0.000547022	0.0103158
3565570	CDGSH Iron Sulfur Domain protein homolog	0.41316	5.87489	11.9467	0.000547445	0.0103158
189999	Serpentine Receptor, class H	-2.44954	-1.78812	11.9449	0.000547986	0.0103158
174197	PUF (Pumilio/FBF) domain-containing	0.548309	6.29835	11.9429	0.000548556	0.0103158
13194964	Uncharacterized protein	-0.773999	4.02675	11.9427	0.000548628	0.0103158
177029	Enhanced RNAI (RNA interference)	0.475882	4.66413	11.9237	0.000554234	0.0104038
172210	Prion-like-(Q/N-rich)-domain-bearing protein	0.375196	8.21722	11.9231	0.000554428	0.0104038
172273	hypothetical protein	0.568802	5.61576	11.9121	0.000557716	0.0104549
177878	Uncharacterized protein	1.07824	4.10433	11.9075	0.000559072	0.0104698
174774	hypothetical protein	0.503408	4.76173	11.8974	0.000562115	0.0105102
179433	Crescerin-like protein che-12	-0.604439	3.74966	11.8966	0.000562361	0.0105102
174755	hypothetical protein	1.14391	2.09049	11.8916	0.000563877	0.010528
186451	hypothetical protein	-1.12712	0.892851	11.8759	0.000568655	0.0106065
175442	CLeavage/Polyadenylation Factor Ia subunit	0.499408	5.13858	11.8734	0.000569417	0.0106101
3896728	hypothetical protein	-0.629779	3.82834	11.8689	0.000570776	0.0106248
182889	hypothetical protein	-0.719547	1.76095	11.8645	0.000572127	0.0106309
177827	Major Sperm Protein	1.22291	3.4329	11.8642	0.000572246	0.0106309
183125	Probable 3',5'-cyclic phosphodiesterase pde-5	-0.816166	2.2005	11.8585	0.000573994	0.0106527
191027	hypothetical protein	-0.873725	1.73508	11.8539	0.00057542	0.0106576
180107	Major sperm protein	1.19271	1.28276	11.8534	0.000575577	0.0106576
190815	C. Elegans Homeobox	-1.53	-1.05319	11.8457	0.000577948	0.0106576
190716	hypothetical protein	0.598235	6.58549	11.8452	0.000578088	0.0106576
174816	hypothetical protein	-0.933492	1.75885	11.8438	0.000578533	0.0106576
177229	Bifunctional arginine demethylase and lysyl-hydroxylase psr-1	0.447403	5.55905	11.8436	0.000578586	0.0106576
177802	Major sperm protein 10/36/56/76	1.04926	3.29772	11.8427	0.000578875	0.0106576
176746	hypothetical protein	-0.970331	1.81706	11.8425	0.000578948	0.0106576
177573	Uncharacterized protein	-0.394511	5.3305	11.841	0.000579414	0.0106576
178305	MEiosis-to-MItosis transition associated	0.559411	4.81115	11.8388	0.000580097	0.0106596
172853	hypothetical protein	0.611971	5.14486	11.8366	0.00058078	0.0106616
183624	hypothetical protein	0.870366	2.78895	11.8336	0.000581723	0.0106684
174892	hypothetical protein	-0.96916	0.648158	11.8173	0.000586844	0.0107494
180872	Heat Shock Protein	0.380952	7.23048	11.8147	0.000587658	0.0107494
172925	Deubiquitylating with USP/UBP and OTU domains	0.45524	6.08013	11.814	0.000587878	0.0107494
172079	Chromodomain and Helicase Domain protein	-0.437286	8.75047	11.8088	0.000589499	0.0107685
176236	Zinc finger transcription factor family protein 1	0.513077	4.63102	11.8022	0.000591601	0.0107911
173709	F-box B protein	-1.42249	-0.426808	11.8013	0.000591897	0.0107911
188233	hypothetical protein	0.438368	5.2616	11.7984	0.00059281	0.0107972
178176	Aminopeptidase-1	0.416504	5.79663	11.7887	0.000595907	0.0108429
175605	ATP Synthase B homolog	0.488058	6.92878	11.7857	0.000596861	0.0108497
175558	GLYcosylation related	-0.440499	6.83872	11.7803	0.000598623	0.0108662
181473	Polyadenylate-binding protein	-0.401791	8.0861	11.7793	0.000598939	0.0108662
176832	T Cell Lineage defect	-0.450162	4.78559	11.776	0.000599984	0.0108746
181690	hypothetical protein	-0.368808	6.70457	11.7734	0.000600834	0.0108794
179995	CDT (S. pombe CDC10 Dependent Transcript) homolog	0.515063	5.6562	11.7713	0.000601505	0.0108809
173653	hypothetical protein	-0.841124	2.07962	11.7625	0.000604349	0.0108977
172520	Low-density lipoprotein receptor-related protein	-0.463467	8.43145	11.7623	0.000604424	0.0108977
190308	EGR (Early Growth factor Response factor) Homolog	0.68574	2.31779	11.7616	0.000604651	0.0108977
177830	Major sperm protein 10/36/56/76	1.25768	1.22757	11.7612	0.000604779	0.0108977
188571	hypothetical protein	-1.04827	1.00809	11.747	0.000609416	0.0109647
180751	Mesodermal Lineage Specification	-0.712968	3.40124	11.7462	0.000609673	0.0109647
179498	O-phosphoseryl-tRNA(Sec) selenium transferase	0.512432	4.35658	11.7431	0.000610696	0.0109725
3565068	hypothetical protein	-0.382657	6.00489	11.7396	0.000611833	0.0109823
182377	Uncharacterized protein	1.42504	0.124787	11.7349	0.000613383	0.0109981
183566	hypothetical protein	0.621563	4.17677	11.7334	0.000613899	0.0109981
183643	Inositol polyphosphate 5-phosphatase	0.378909	5.63007	11.7275	0.000615847	0.0110224
173981	Major sperm protein 19/31/40/45/50/51/53/59/61/65/81/113/142	1.28211	2.31004	11.7245	0.000616812	0.0110291
180730	hypothetical protein	-0.471139	5.44921	11.7151	0.000619948	0.0110527
184905	Skn-1 dependent zygotic transcript 15 protein	-1.10636	0.0333315	11.7141	0.000620276	0.0110527
189789	Catechol-O-MethylTransferase family	1.64681	3.97431	11.7133	0.000620559	0.0110527
186080	hypothetical protein	1.12576	1.25879	11.712	0.000620986	0.0110527
177019	Neuronal SYmmetry	-0.626275	5.62237	11.7116	0.000621103	0.0110527
189151	F-box B protein	-2.77505	-2.26765	11.708	0.000622312	0.0110636
191457	hypothetical protein	-0.806331	1.46782	11.7018	0.000624398	0.0110901
173751	hypothetical protein	-0.611896	5.25092	11.698	0.000625667	0.011102
181251	hypothetical protein	-0.5253	5.34439	11.6826	0.000630886	0.0111715
177916	Uncharacterized protein	1.09625	4.23821	11.6813	0.000631307	0.0111715
180025	C-type LECtin	1.77133	3.60466	11.6811	0.000631387	0.0111715
183174	hypothetical protein	-0.589398	4.43697	11.6781	0.000632409	0.011179
175858	AT hook-containing protein attf-4	-0.397675	6.47052	11.6634	0.00063743	0.011257
13216595	tRNA (guanine(37)-N1)-methyltransferase	0.419753	4.6641	11.6607	0.00063836	0.0112628
176882	Ephrin-4	-0.454163	4.85031	11.6556	0.000640097	0.0112827
172812	Probable histone chaperone asf-1-like protein	0.53754	4.95509	11.6511	0.00064164	0.0112992
177087	Chondroitin proteoglycan 9	0.636771	3.2753	11.6466	0.000643202	0.011316
180357	Defective pharyngeal development protein 4	-0.445779	6.26767	11.6433	0.000644328	0.0113251
180324	SWI/SNF nucleosome remodeling complex component	-0.43194	6.34558	11.6397	0.000645604	0.0113282
189079	hypothetical protein	-0.662413	3.00054	11.6377	0.000646286	0.0113282
177631	SQuashed Vulva	0.44914	6.4116	11.6373	0.000646427	0.0113282
173418	hypothetical protein	-0.507857	5.57049	11.6358	0.000646943	0.0113282
175473	hypothetical protein	0.523328	5.27088	11.6316	0.000648393	0.0113429
3565670	hypothetical protein	-0.975156	1.68779	11.6237	0.000651176	0.0113809
181170	Tubulin beta-4 chain	-0.597148	5.23633	11.6148	0.00065428	0.0114131
177474	Kinesin-like protein	0.482882	6.31403	11.6144	0.000654415	0.0114131
172293	SPerm CHromatin enriched	1.13963	2.95171	11.6132	0.000654861	0.0114131
180313	hypothetical protein	-0.517232	4.53125	11.6108	0.000655706	0.0114171
177922	Uncharacterized protein	0.968484	1.80006	11.6031	0.000658405	0.0114534
176717	hypothetical protein	0.471148	4.98144	11.5923	0.000662246	0.0115095
179819	Suppressor of Overexpressed MIcro-RNA	-0.468869	6.90685	11.5843	0.000665093	0.0115387
180445	Phosphatidylcholine:ceramide cholinephosphotransferase 2	-0.467735	4.49677	11.5841	0.000665168	0.0115387
259512	hypothetical protein	0.583493	3.1601	11.5792	0.000666942	0.0115502
180444	TBC (Tre-2/Bub2/Cdc16) domain family	-0.383403	5.35637	11.5778	0.000667447	0.0115502
184255	Nuclear Hormone Receptor family	-0.947255	2.10016	11.5771	0.000667698	0.0115502
173681	BTB and MATH domain containing	-0.507156	4.62473	11.5704	0.000670091	0.0115809
176275	Ras-related protein Rab-6.1	0.40808	5.89189	11.5651	0.000672014	0.0116033
6418595	hypothetical protein	-0.877094	1.8195	11.5558	0.00067538	0.0116506
173071	hypothetical protein	0.446982	8.44649	11.5514	0.000676996	0.0116677
188547	F-box B protein	-0.569875	3.04321	11.5485	0.000678045	0.0116747
184985	hypothetical protein	-2.13928	0.174479	11.5456	0.000679101	0.0116747
190335	hypothetical protein	0.703589	2.16484	11.5443	0.00067958	0.0116747
172169	hypothetical protein	0.505513	6.27211	11.5434	0.000679914	0.0116747
186838	Serpentine receptor class X 45	-0.787335	1.53852	11.5339	0.000683386	0.0117209
174947	Pumilio domain-containing protein 6	0.505124	5.72143	11.5326	0.000683868	0.0117209
178984	hypothetical protein	-0.833127	3.91788	11.5216	0.00068791	0.0117794
173424	CalPoNin	-0.606954	4.8746	11.5124	0.000691333	0.0118271
172131	Flavin-containing monooxygenase	0.515126	5.50056	11.5027	0.00069494	0.0118778
188854	Ligand-Gated ion Channel	-0.743944	2.58799	11.4918	0.000699056	0.0119372
172285	hypothetical protein	0.446148	5.09022	11.4842	0.000701897	0.0119647
188530	hypothetical protein	-0.94437	2.69777	11.4841	0.000701952	0.0119647
179617	Putative thiosulfate sulfurtransferase mpst-1	0.443115	4.71863	11.474	0.000705759	0.0120177
172575	hypothetical protein	1.10166	1.39445	11.471	0.000706915	0.0120177
184143	F-box B protein	-0.823728	1.39963	11.4708	0.000706999	0.0120177
3564935	hypothetical protein	2.07003	-1.75351	11.4632	0.000709876	0.0120556
180221	hypothetical protein	-0.418827	5.34259	11.4546	0.000713165	0.0121004
180101	Major sperm protein	1.17777	1.4935	11.452	0.000714175	0.0121065
178933	Nuclear hormone receptor family member nhr-47	-0.394092	5.27101	11.4469	0.000716124	0.0121285
177858	Uncharacterized protein	0.458744	5.6236	11.4332	0.000721449	0.0122055
173788	Myoblast determination protein 1 homolog	-0.523598	4.01241	11.4318	0.000721989	0.0122055
259560	SERotonin/octopamine receptor family	-0.718118	1.96526	11.4275	0.000723654	0.0122172
191749	PaTched Related family	-0.632889	3.49462	11.4266	0.000723993	0.0122172
259658	Serpentine Receptor, class W	-0.843592	1.67402	11.4244	0.000724853	0.0122206
175452	CRAL-TRIO domain-containing protein C34C12.6	-0.649688	4.55376	11.415	0.000728516	0.0122612
179871	hypothetical protein	0.557007	4.15688	11.4149	0.000728575	0.0122612
173897	intestinal acid PHOsphatase	-0.627685	6.3919	11.4102	0.000730426	0.0122812
175081	HMG	-0.462311	9.5416	11.3968	0.000735698	0.0123587
184408	Uncharacterized protein	0.629403	3.0472	11.389	0.000738799	0.0123996
180717	Autophagic-related protein 16.1	-0.364778	5.23518	11.3873	0.000739482	0.0123998
3565691	hypothetical protein	-0.443469	5.27237	11.3815	0.000741789	0.012426
178519	Uncharacterized protein	0.606443	5.42713	11.38	0.000742377	0.012426
179501	hypothetical protein	0.496523	5.08675	11.3695	0.000746613	0.0124856
189418	Uncharacterized protein	-1.06671	0.30548	11.3663	0.000747907	0.012496
7040149	hypothetical protein	-0.74084	4.54214	11.3618	0.000749719	0.0125151
178754	Phospholipid-transporting ATPase	-0.95254	0.558777	11.3547	0.000752579	0.0125515
180747	GLIoTactin (Drosophila neuroligin-like) homolog	-0.386543	5.4487	11.3522	0.000753588	0.0125571
187610	hypothetical protein	-1.10569	1.86831	11.3503	0.000754376	0.012559
191443	hypothetical protein	1.15344	2.00841	11.3435	0.000757145	0.0125938
181110	human UTX (Ubiquitously transcribed TPR on X) homolog	-0.467781	5.74634	11.3406	0.000758288	0.0126015
190363	Uncharacterized protein	-0.529623	3.45624	11.3337	0.000761123	0.0126374
172945	hypothetical protein	0.522769	4.61617	11.33	0.000762666	0.0126517
179699	TWiK family of potassium channels	-0.774159	1.63906	11.3257	0.000764424	0.0126696
184829	Serine/threonine-protein phosphatase	0.608765	3.56608	11.3121	0.000770028	0.0127466
173099	hypothetical protein	1.13497	3.1491	11.311	0.000770505	0.0127466
188808	DieneLactone Hydrolase Domain containing protein	-0.475613	4.07098	11.3095	0.000771128	0.0127466
186602	Palmitoyltransferase	1.44248	-0.0651203	11.3026	0.000773984	0.0127664
187454	hypothetical protein	-0.734396	2.36618	11.3017	0.00077435	0.0127664
178223	Uncharacterized protein	0.482587	4.96216	11.3016	0.000774389	0.0127664
187664	C-type LECtin	-0.678687	3.88732	11.2859	0.000780964	0.0128634
171913	hypothetical protein	0.523163	5.19576	11.2794	0.000783711	0.0128972
178197	Sperm Meiosis PDZ domain containing proteins	1.1089	2.21422	11.2697	0.000787815	0.0129533
176578	asparaginyl(N) Amino-acyl tRNA Synthetase	0.464956	4.70209	11.2648	0.00078991	0.0129763
177189	TransThyretin-Related family domain	-0.593525	3.51541	11.2616	0.000791259	0.012977
181253	GIT1 (mammalian G protein-coupled receptor kinase InTeractor 1) homolog	-0.389162	5.47311	11.2614	0.000791348	0.012977
184335	O-ACyltransferase homolog	-1.07471	1.73264	11.2594	0.000792221	0.0129799
185483	Nuclear Hormone Receptor family	-0.652993	3.40738	11.2526	0.000795098	0.0130091
171787	Ectopic P granules protein 2	-0.456092	7.8569	11.2519	0.000795403	0.0130091
181206	Nicotinic Receptor Associated	-0.382043	6.19117	11.2357	0.000802395	0.0131119
181255	Liprin-alpha	-0.423489	6.48191	11.2278	0.000805814	0.0131516
187290	hypothetical protein	0.703253	2.02498	11.2268	0.000806237	0.0131516
174471	Putative methionine synthase reductase	0.444864	5.98867	11.2219	0.000808387	0.0131736
185776	F-box B protein	-1.82567	-0.824164	11.2205	0.000809008	0.0131736
182569	Serpentine Receptor, class R	1.03298	0.828728	11.2188	0.000809745	0.0131741
187618	hypothetical protein	0.586465	3.30061	11.2081	0.000814396	0.0132243
175067	hypothetical protein	1.18665	0.844406	11.207	0.000814901	0.0132243
176347	Exonuclease mut-7	0.486359	5.90155	11.2058	0.000815439	0.0132243
3565217	hypothetical protein	-1.30266	-0.848601	11.2052	0.000815676	0.0132243
174654	Protein fantom	-0.641049	3.76469	11.2007	0.000817664	0.013245
190137	Girdin homolog	-0.531743	6.58513	11.1962	0.000819663	0.0132556
182650	hypothetical protein	0.807024	3.5199	11.196	0.000819743	0.0132556
6418636	hypothetical protein	-0.688197	1.72961	11.1943	0.000820512	0.0132565
180557	Amino Acid Transporter	-0.488696	6.22868	11.1808	0.000826489	0.0133415
174865	hypothetical protein	-0.827836	1.67403	11.174	0.000829532	0.0133735
176880	Amino acid transporter	-0.803052	1.24266	11.1731	0.000829908	0.0133735
179580	hypothetical protein	0.395658	5.76521	11.1712	0.000830784	0.013376
176830	Uncharacterized protein	1.0571	3.10867	11.166	0.000833105	0.0133958
177096	Uncharacterized protein	-0.571335	3.80751	11.1652	0.000833454	0.0133958
178245	Downstream Of DAF-16 (regulated by DAF-16)	0.505209	7.2703	11.1587	0.000836407	0.0134316
259901	ACid Phosphatase family	1.60219	-0.367781	11.1467	0.000841822	0.0135069
172968	Succinate dehydrogenase [ubiquinone] flavoprotein subunit, mitochondrial	0.546551	6.19789	11.1425	0.000843699	0.0135182
174110	hypothetical protein	0.393056	6.02197	11.1419	0.000843982	0.0135182
172844	LSY-2-Like	0.51429	5.50082	11.1365	0.000846436	0.0135459
179661	hypothetical protein	-0.559288	3.24839	11.1314	0.000848786	0.013565
173566	MATH (meprin-associated Traf homology) domain containing	-0.611135	2.18404	11.1307	0.000849086	0.013565
175492	Chromosome condensation protein dpy-27	-0.40468	7.2938	11.1274	0.000850604	0.0135775
171849	Protein pop-1	-0.427948	6.054	11.1241	0.000852135	0.0135788
191624	Homeobox protein ceh-40	-0.576338	3.1462	11.1241	0.000852145	0.0135788
179340	Probable histone H2B 3	-0.363431	6.08723	11.1225	0.000852887	0.013579
259335	COLlagen	0.909261	3.89393	11.1186	0.000854667	0.0135957
180350	MeNoRin (dendritic branching protein)	-0.427953	5.81433	11.1098	0.000858739	0.0136488
181107	Nematode Specific Peptide family, group C	-0.609567	4.2214	11.1067	0.000860176	0.01366
188843	hypothetical protein	-0.646143	4.7501	11.0931	0.00086649	0.0137485
190146	Uncharacterized protein	-0.672943	3.86341	11.0856	0.000870012	0.0137772
180056	HAlF transporter (PGP related)	0.38061	6.06249	11.085	0.000870291	0.0137772
179481	Mitochondrial import inner membrane translocase subunit TIM50	0.3531	6.51354	11.0817	0.000871842	0.0137772
187175	hypothetical protein	-1.15333	0.344935	11.0816	0.000871889	0.0137772
13182108	hypothetical protein	-1.14643	-0.180449	11.0791	0.000873058	0.0137772
174372	BCS1 (mitochondrial chaperone) homolog	0.512417	5.33374	11.0785	0.000873334	0.0137772
177831	Nematode Specific Peptide family, group D	0.962741	2.72546	11.0771	0.000873996	0.0137772
178619	hypothetical protein	-0.452966	5.775	11.0756	0.000874725	0.0137772
188452	TWiK family of potassium channels	-0.597857	3.74224	11.0751	0.000874964	0.0137772
172499	Leucyl Amino-acyl tRNA Synthetase	0.455511	5.23419	11.0682	0.000878185	0.013814
182517	hypothetical protein	0.957205	1.76576	11.0653	0.000879587	0.013814
172302	Probable mitochondrial import inner membrane translocase subunit tin-44	0.431102	6.03417	11.0628	0.000880784	0.013814
191249	hypothetical protein	-1.14734	2.53941	11.0607	0.000881748	0.013814
183557	Uncharacterized protein	1.27214	-0.329659	11.0604	0.000881918	0.013814
177784	Uncharacterized protein	-0.674442	4.66767	11.0597	0.000882226	0.013814
191618	Homeobox protein engrailed-like ceh-16	-0.690056	2.98792	11.0592	0.000882503	0.013814
179366	AQuaPorin or aquaglyceroporin related	0.426587	5.43476	11.0567	0.00088368	0.0138208
173834	hypothetical protein	1.07845	2.82908	11.0538	0.000885057	0.0138307
177463	Drosophila PRicKLe homolog	-0.4754	5.59752	11.0472	0.000888215	0.0138684
178924	hypothetical protein	-0.431487	5.61171	11.0412	0.000891092	0.0139016
177844	Major sperm protein 77/79	1.13631	1.23975	11.0354	0.00089387	0.0139117
187208	hypothetical protein	0.959575	1.70965	11.0353	0.000893909	0.0139117
181699	Intermediate filament protein ifa-3	-0.750737	5.63379	11.0352	0.000893985	0.0139117
182107	Uncharacterized transporter slc-17.3	0.690554	2.667	11.0314	0.000895834	0.0139145
177453	Uncharacterized protein	-0.396952	5.53535	11.0309	0.000896047	0.0139145
180637	Protein sax-3	-0.390398	7.32218	11.0295	0.000896722	0.0139145
177399	BLIstered cuticle	1.33992	1.53871	11.0286	0.000897154	0.0139145
179738	hypothetical protein	0.428202	6.08133	11.0219	0.000900402	0.0139353
174370	COLlagen	1.42354	1.4181	11.0215	0.000900593	0.0139353
172533	Glucosamine phosphate N-Acetyl transferase	0.507279	5.95608	11.021	0.000900852	0.0139353
175195	GEX Interacting protein	-0.423343	8.30309	11.0182	0.000902218	0.0139353
182816	hypothetical protein	1.7138	1.48074	11.0182	0.00090224	0.0139353
177843	Sperm-Specific family, class S	1.02463	3.27997	11.0105	0.00090597	0.0139813
180549	Feminizing gene On X	-0.477343	5.51067	11.0078	0.000907277	0.0139898
182916	Uncharacterized protein	1.63935	-0.775414	10.9963	0.000912957	0.0140657
186450	hypothetical protein	-0.909048	0.765021	10.9817	0.000920157	0.0141649
172966	Lon protease homolog, mitochondrial	0.448526	6.57618	10.9797	0.000921132	0.0141682
176157	Transcription factor unc-86	-0.511724	4.72118	10.9734	0.000924273	0.0141944
181231	Steroid hormone receptor family member cnr14	-0.545548	5.97942	10.9733	0.000924362	0.0141944
187615	Probable glutathione S-transferase 9	1.06187	0.238602	10.9704	0.000925796	0.0142047
174971	Zinc finger putative Transcription Factor family	-0.398895	5.10805	10.9633	0.000929357	0.0142375
191726	Nuclear hormone receptor family member nhr-77	-0.995903	3.12109	10.9631	0.000929462	0.0142375
177693	Glycine Rich Secreted Protein	-0.511634	4.22147	10.9596	0.000931196	0.0142523
174766	hypothetical protein	0.471519	5.83293	10.9501	0.000935981	0.0143137
179922	Activating Transcription Factor associated with Stress	0.373087	6.34756	10.945	0.00093858	0.0143344
175674	Novel Channel type/putative Nematode CAlcium channel	-0.586329	3.15175	10.9444	0.000938873	0.0143344
188723	hypothetical protein	-0.626661	2.71972	10.9368	0.000942717	0.0143717
178063	Delta-like protein	-0.666882	4.47591	10.9352	0.000943549	0.0143717
186875	Sugar transporter SWEET1	-0.571606	4.72341	10.935	0.000943641	0.0143717
181408	Suppressor of Constitutive Dauer formation	-0.384982	7.59991	10.9322	0.000945095	0.0143717
177586	Uncharacterized protein	-0.449369	4.51983	10.932	0.000945181	0.0143717
189477	hypothetical protein	1.58894	-0.720473	10.9227	0.000949918	0.0144153
174732	Regulator of Microtubule Dynamics	1.05528	2.02646	10.9213	0.000950652	0.0144153
191033	F-box A protein	2.6072	-1.92409	10.9204	0.000951093	0.0144153
181030	Putative acetylcholine regulator unc-18	-0.355629	6.7969	10.9203	0.000951152	0.0144153
174055	Anillin-like protein 2	0.550571	6.72119	10.9173	0.00095269	0.0144183
6418634	hypothetical protein	-1.62639	-0.291424	10.9158	0.00095345	0.0144183
183774	Neuropeptide-Like Protein	1.47789	-1.03079	10.9154	0.000953671	0.0144183
173317	DNA-directed RNA polymerase	0.385451	5.60908	10.9128	0.000955029	0.0144271
13180429	hypothetical protein	1.15282	0.791755	10.9099	0.000956531	0.0144346
186035	hypothetical protein	1.8926	-0.431225	10.9084	0.000957302	0.0144346
178457	5'-nucleotidase	0.378617	5.53358	10.9073	0.000957856	0.0144346
181405	ATF (cAMP-dependent transcription factor) family	-0.372932	5.72847	10.8983	0.000962551	0.0144936
181234	hypothetical protein	-0.510931	6.38077	10.8927	0.000965425	0.014514
174863	ThioredoXin Domain Containing protein homolog	-0.553607	6.19954	10.8926	0.000965469	0.014514
185331	GATOR complex protein NPRL3	0.410963	5.28477	10.8892	0.000967277	0.0145295
176783	MLH (MutL Homolog) family	0.446523	5.89005	10.8813	0.000971388	0.0145794
3565405	hypothetical protein	0.465165	3.56305	10.877	0.000973644	0.0145928
184511	hypothetical protein	-0.579496	2.48978	10.8763	0.000974019	0.0145928
174590	ATPase family AAA domain-containing protein 3	0.416897	6.09258	10.8751	0.000974632	0.0145928
179603	Homeobox protein ceh-32	-0.475528	6.32511	10.8728	0.000975853	0.0145981
174157	MutS protein homolog him-14	0.682692	4.29442	10.8705	0.000977081	0.0145981
176645	hypothetical protein	-0.48269	5.38779	10.87	0.000977338	0.0145981
175169	hypothetical protein	-0.50532	4.29621	10.8675	0.000978691	0.0146065
174802	Uncharacterized serine carboxypeptidase F13S12.6	-0.572087	7.75669	10.8647	0.000980167	0.0146168
188246	Zinc finger In Meiosis	0.530479	4.71926	10.8619	0.000981649	0.0146272
4363024	F-box B protein	-0.692672	2.875	10.8555	0.000985024	0.014652
184868	hypothetical protein	-0.990902	0.312632	10.8554	0.000985074	0.014652
181039	hypothetical protein	-0.398203	5.59299	10.8543	0.000985677	0.014652
186575	hypothetical protein	0.450936	4.75317	10.8504	0.000987756	0.0146712
173970	DNA N6-methyl methyltransferase	0.466897	4.35281	10.8438	0.000991292	0.0147119
191913	Serpentine Receptor, class I	2.97856	-1.96707	10.8388	0.000993969	0.0147399
3565720	hypothetical protein	0.58517	3.33337	10.8362	0.000995352	0.0147487
3565972	hypothetical protein	0.444593	4.59389	10.8323	0.000997443	0.0147625
177479	Uncharacterized protein	-0.686644	2.71736	10.8315	0.000997877	0.0147625
177316	Histone DeAcetylase	0.387622	6.85445	10.8282	0.000999678	0.0147774
174349	hypothetical protein	1.29507	0.351143	10.8253	0.0010012	0.0147882
184091	AdaPtin, Small chain (clathrin associated complex)	-0.388991	4.92226	10.8173	0.00100556	0.0148409
174533	Protein male abnormal 3	-0.927376	0.286735	10.8122	0.00100836	0.0148702
191266	Serpentine Receptor, class H	-3.89897	-2.7342	10.8073	0.00101103	0.0148978
180942	MAD-Like	-0.461083	6.27232	10.8046	0.00101246	0.0149065
176092	Cytokinesis defective protein 7	0.486852	5.57341	10.8032	0.00101322	0.0149065
173626	SET (trithorax/polycomb) domain containing	-0.84295	0.915499	10.7993	0.00101539	0.0149267
174034	Mitochondrial prohibitin complex protein 2	0.366537	7.35221	10.7962	0.0010171	0.0149399
179734	Histone H3.3-like type 2	0.504861	5.93888	10.7941	0.00101825	0.0149451
188283	hypothetical protein	1.12227	-0.0382749	10.791	0.00101994	0.0149581
181793	Protection Of Telomeres 1 (Pot1) homolog	0.526892	2.99427	10.7838	0.0010239	0.0150043
176065	Telomere length regulation protein clk-2	0.408612	5.56224	10.7777	0.00102729	0.0150362
186462	F-box A protein	0.654959	3.23235	10.777	0.0010277	0.0150362
172399	G1/S-specific cyclin-E	0.526389	6.44868	10.7686	0.00103238	0.0150841
179728	Probable cytochrome c 2.2	1.13955	1.60365	10.7682	0.00103259	0.0150841
178390	Uncharacterized protein	1.17425	2.08571	10.7665	0.00103351	0.0150857
174645	NHP2-like protein 1 homolog	0.3759	7.51362	10.7604	0.00103698	0.0151227
171981	Low-density lipoprotein RecePtor related	-0.418015	7.57859	10.7591	0.00103767	0.0151227
177157	Helix Loop Helix	-0.370678	7.64998	10.7565	0.00103914	0.0151278
174566	Oocyte and Germ-line Related	0.522934	3.92542	10.7556	0.00103965	0.0151278
181271	SMAll	-0.366085	7.75064	10.7504	0.00104258	0.0151586
178017	SKI (yeast SuperKIller) Helicase homolog	0.424484	6.08633	10.7476	0.00104412	0.0151691
176675	hypothetical protein	0.576216	4.69758	10.7436	0.00104643	0.0151908
6418667	hypothetical protein	1.44474	-1.15875	10.7416	0.00104755	0.0151952
171813	Sperm-specific class P protein 19	1.46666	-0.238756	10.7395	0.00104875	0.0152007
182608	hypothetical protein	1.14549	2.4327	10.7346	0.00105149	0.0152286
260202	SKN-1 Dependent Zygotic transcript	-0.981972	0.0646296	10.7292	0.00105457	0.0152496
172811	hypothetical protein	-0.521618	4.8855	10.7292	0.00105458	0.0152496
177828	Major sperm protein 10/36/56/76	1.44348	-0.104882	10.7202	0.0010597	0.0153117
173161	Profilin-1	0.398269	7.27452	10.7152	0.0010626	0.0153344
188870	hypothetical protein	0.439183	5.35018	10.7143	0.00106309	0.0153344
174713	Probable cytochrome c-type heme lyase	0.37937	6.4921	10.7132	0.00106374	0.0153344
259674	hypothetical protein	-0.673589	2.7327	10.7109	0.00106508	0.0153384
173860	SHC (Src Homology domain C-terminal) adaptor homolog	-0.487402	5.30841	10.7098	0.00106567	0.0153384
172251	Nuclear hormone receptor family member nhr-2	-0.686787	4.46951	10.7041	0.00106901	0.01536
180239	hypothetical protein	0.497565	4.21068	10.7034	0.00106941	0.01536
182009	Uncharacterized protein	1.88423	-1.12009	10.7029	0.00106965	0.01536
174694	hypothetical protein	0.457946	4.1484	10.7005	0.00107107	0.0153686
176091	Homeobox protein mab-5	-0.579462	3.77435	10.6854	0.00107985	0.0154825
177596	Alpha-tubulin N-acetyltransferase 1	-0.450833	5.66131	10.68	0.00108298	0.0155154
174878	hypothetical protein	-0.962146	1.16966	10.671	0.00108831	0.0155798
6418690	hypothetical protein	-0.966808	1.54313	10.6654	0.00109156	0.0156143
180433	ImmunoGlobulin-like Cell adhesion Molecule family	-0.556551	5.84336	10.6638	0.0010925	0.0156158
176453	Orotidine 5'-phosphate decarboxylase	0.419971	5.76827	10.6566	0.00109681	0.0156542
172804	hypothetical protein	0.561338	7.23511	10.6565	0.00109687	0.0156542
180488	hypothetical protein	-0.737394	2.08411	10.6523	0.00109935	0.0156706
182456	hypothetical protein	-0.727199	6.38781	10.6517	0.00109971	0.0156706
173188	hypothetical protein	-0.566587	6.11248	10.6479	0.00110196	0.0156907
178422	Major sperm protein	-0.45694	4.04572	10.6411	0.00110604	0.0157368
259426	BTB and MATH domain containing	0.573783	3.75221	10.636	0.00110908	0.0157616
187006	hypothetical protein	0.944124	1.31437	10.6353	0.00110949	0.0157616
13180284	hypothetical protein	0.489916	4.6413	10.6334	0.00111063	0.0157658
13183371	hypothetical protein	2.17804	-1.60249	10.6317	0.00111166	0.0157684
182048	hypothetical protein	-0.762356	1.30166	10.6256	0.00111531	0.0158082
172751	Phosphotransferase	0.4512	7.40704	10.6064	0.00112696	0.0159612
179768	hypothetical protein	-0.506977	6.96439	10.6037	0.00112864	0.0159727
187256	3'-5' exoribonuclease parn-1	0.649354	3.44521	10.5995	0.00113119	0.015985
175613	Amidophosphoribosyltransferase	0.655746	4.07456	10.5994	0.00113122	0.015985
186476	Serpentine receptor class epsilon-30	-3.75282	-2.78351	10.5942	0.00113441	0.0160179
189432	Uncharacterized protein	0.469777	4.90301	10.5912	0.00113626	0.0160228
174531	Membrane-associated tyrosine-and threonine-specific cdc2-inhibitory kinase wee-1.3	0.508619	6.94878	10.5909	0.00113648	0.0160228
178046	Glucose-6-phosphate 1-dehydrogenase	0.45972	5.9411	10.5883	0.00113806	0.0160328
190008	hypothetical protein	-0.739096	2.79348	10.5858	0.00113957	0.0160419
181743	Patronin (microtubule-binding protein) homolog	-0.364985	6.39085	10.5812	0.00114245	0.0160703
187308	hypothetical protein	1.11758	1.24511	10.5706	0.00114903	0.0161507
175399	Probable tRNA N6-adenosine threonylcarbamoyltransferase	0.350485	5.58626	10.5582	0.00115676	0.0162471
176076	FiBrilliN homolog	-0.577241	6.89876	10.5514	0.00116097	0.016294
187389	ThioRedoXin [see also xtr]	0.512375	4.17026	10.5467	0.00116393	0.0163231
180832	hypothetical protein	0.541126	3.0506	10.5419	0.00116699	0.0163428
181308	COLlagen	0.533913	5.79633	10.5417	0.00116709	0.0163428
188949	F-box B protein	-0.994495	0.428288	10.535	0.00117134	0.01639
186917	ComPleXin (synaptic protein) homolog	-0.76841	2.38141	10.5247	0.00117791	0.0164674
181471	Serine/threonine kinase SAD-1	-0.592347	5.12586	10.5235	0.00117864	0.0164674
177852	Dihydropyrimidinase 2	-0.482673	4.66398	10.5156	0.0011837	0.0165256
173785	hypothetical protein	0.496902	6.05205	10.5118	0.00118616	0.0165446
173735	hypothetical protein	0.516155	5.23983	10.5103	0.00118711	0.0165446
189365	Serpentine Receptor, class T	-1.32444	-0.547313	10.5093	0.00118773	0.0165446
13187952	Double-Strand Break factor	0.462692	4.60626	10.5062	0.00118973	0.01656
190742	hypothetical protein	0.598451	2.89299	10.5	0.00119374	0.0166035
174170	hypothetical protein	0.896177	1.09107	10.4936	0.00119786	0.0166483
191735	NanOS related	0.500006	4.08501	10.4889	0.00120093	0.0166785
175100	Chloride intracellular channel exl-1	0.4357	5.1684	10.4831	0.00120471	0.0167185
171784	Cyclin-dependent kinase 7	0.391058	5.78766	10.4816	0.0012057	0.0167198
172989	hypothetical protein	-0.516788	7.82577	10.479	0.00120736	0.0167303
191605	AcetylCholine Receptor	-0.679685	1.94336	10.476	0.00120932	0.016745
185599	hypothetical protein	0.854069	1.80836	10.4659	0.00121597	0.0168245
171785	hypothetical protein	-0.376117	8.1752	10.4615	0.0012189	0.0168506
180713	AP-2 complex subunit mu	-0.366785	6.42804	10.4603	0.00121967	0.0168506
172295	hypothetical protein	0.425189	5.03846	10.4562	0.00122237	0.0168754
178282	TransThyretin-Related family domain	0.397188	8.04889	10.454	0.00122383	0.0168831
176148	Heat shock protein Hsp-12.2	-0.492613	6.2328	10.4486	0.00122741	0.016908
174366	Prion-like-(Q/N-rich)-domain-bearing protein	-0.595941	6.89671	10.4486	0.00122745	0.016908
180425	hypothetical protein	-0.418502	4.89606	10.44	0.00123315	0.0169739
176382	Xylosylprotein 4-beta-galactosyltransferase	0.412691	4.98253	10.4319	0.00123855	0.0170356
181998	F-box B protein	-0.790598	1.22999	10.4282	0.00124109	0.0170578
172137	hypothetical protein	0.610296	3.59488	10.4221	0.00124517	0.0171012
188637	Serpentine Receptor, class AB (class A-like)	-1.95305	-1.63427	10.4195	0.00124694	0.017113
174542	Probable dolichyl pyrophosphate Glc1Man9GlcNAc2 alpha-1,3-glucosyltransferase	0.43665	4.71539	10.4036	0.00125771	0.017248
174159	Lysine--tRNA ligase	0.454836	7.85501	10.3981	0.00126145	0.0172866
179950	hypothetical protein	0.981377	1.57843	10.3964	0.00126259	0.0172894
185100	Serpentine receptor class epsilon-6	-0.974159	0.953656	10.3921	0.00126553	0.0173161
175107	Bifunctional L-3-cyanoalanine synthase/cysteine synthase	-0.761577	7.04798	10.3909	0.00126639	0.0173161
178819	hypothetical protein	0.559069	4.76945	10.3885	0.00126802	0.0173255
181380	hypothetical protein	-0.409362	4.62232	10.3866	0.00126932	0.0173306
179496	hypothetical protein	-0.411842	9.16656	10.3804	0.00127362	0.0173765
177932	Uncharacterized protein	0.479583	5.4884	10.378	0.00127527	0.0173863
172159	FANCM (Fanconi anemia complex component M) homolog	0.551539	4.68286	10.375	0.00127737	0.0174021
259943	Uncharacterized protein	0.799795	1.99996	10.3736	0.00127832	0.0174024
172250	FACT complex subunit ssrp1-B	0.505274	6.90145	10.3645	0.00128463	0.0174755
174229	hypothetical protein	-0.530898	6.16398	10.3601	0.00128768	0.0175042
187743	Uncharacterized protein	-0.562067	7.49693	10.3569	0.00128995	0.0175222
177624	TuBulin folding Cofactor E homolog	0.409092	5.29509	10.3504	0.00129445	0.0175705
178790	Myotubularin-related protein 9	0.417178	5.62138	10.3483	0.00129597	0.0175783
175012	hypothetical protein	-0.435317	5.73722	10.3449	0.00129831	0.0175972
178709	#N/A	-1.20629	2.02994	10.3431	0.00129963	0.0176021
190056	hypothetical protein	0.61451	3.19849	10.3417	0.00130057	0.0176021
178171	DNaJ domain (prokaryotic heat shock protein)	0.486282	4.43174	10.3351	0.00130523	0.0176524
181204	hypothetical protein	-0.390859	4.9363	10.3299	0.0013089	0.0176804
190357	hypothetical protein	3.65829	-2.23663	10.329	0.00130953	0.0176804
189949	C-type LECtin	-0.620039	3.75938	10.3282	0.00131015	0.0176804
180452	Diacylglycerol kinase	-0.549159	5.12531	10.3119	0.00132174	0.0178239
188284	hypothetical protein	0.726358	2.14615	10.3078	0.00132471	0.0178384
178174	related to yeast Vacuolar Protein Sorting factor	0.356721	5.90093	10.3075	0.00132488	0.0178384
189096	Fatty Acid/Retinol binding protein	0.417915	6.3023	10.3053	0.0013265	0.0178384
187445	X-BoX promoter element regulated	-0.921281	0.852268	10.3051	0.00132665	0.0178384
178850	hypothetical protein	0.505766	3.60852	10.3027	0.00132834	0.0178481
173825	Major sperm protein 3	1.12753	1.75659	10.2939	0.00133472	0.0179208
180789	Prion-like-(Q/N-rich)-domain-bearing protein	-0.407586	5.11918	10.288	0.00133896	0.0179547
190641	SET (trithorax/polycomb) domain containing	1.8524	-1.45424	10.2873	0.0013395	0.0179547
178889	Carnitine Palmitoyl Transferase	-0.40362	5.04787	10.2864	0.00134014	0.0179547
177939	UDP-GlucuronosylTransferase	0.356033	5.756	10.2846	0.00134145	0.0179594
175804	EGG sterile (unfertilizable)	0.539239	7.9429	10.2816	0.00134365	0.0179728
181991	hypothetical protein	2.31142	-2.09518	10.2806	0.00134438	0.0179728
180990	Rab-3-interacting molecule unc-10	-0.488262	5.0955	10.2696	0.00135241	0.0180632
181520	hypothetical protein	-0.388142	6.09174	10.2687	0.00135309	0.0180632
182179	hypothetical protein	-0.568771	3.60573	10.2644	0.00135619	0.0180916
174020	Regulator of G protein Signaling	-0.56836	2.9722	10.2587	0.0013604	0.0181347
179660	GAlactosidase/N-Acetylgalactosaminidase	-0.488434	4.95429	10.2544	0.0013636	0.0181391
176079	hypothetical protein	0.875425	0.894477	10.2534	0.00136433	0.0181391
177021	ParaPleGiN AAA protease family	0.390601	5.19882	10.2522	0.00136525	0.0181391
13181457	hypothetical protein	-0.410899	6.57079	10.2506	0.00136639	0.0181391
191941	Serpentine Receptor, class J	1.95411	-1.83276	10.2506	0.00136642	0.0181391
180338	hypothetical protein	-0.342019	5.8056	10.2504	0.00136658	0.0181391
176098	hypothetical protein	0.445758	5.15532	10.2431	0.00137196	0.018187
190831	hypothetical protein	1.25045	-0.769959	10.2429	0.00137214	0.018187
176759	Receptor expression-enhancing protein	1.1449	0.908821	10.2403	0.00137406	0.0181881
173982	Major sperm protein	1.18083	1.42756	10.2401	0.0013742	0.0181881
180556	TBC (Tre-2/Bub2/Cdc16) domain family	-0.402751	6.20843	10.2388	0.00137521	0.0181881
188743	hypothetical protein	-0.745712	1.37739	10.2375	0.00137613	0.0181881
184454	BTB and MATH domain containing	0.53212	3.52351	10.232	0.00138025	0.0182295
179675	Kinesin-like protein vab-8	-0.416609	6.09573	10.2261	0.00138464	0.0182629
184287	DM (Doublesex/MAB-3) Domain family	-0.584681	3.03383	10.226	0.00138475	0.0182629
180176	Dosage compensation protein dpy-21	-0.351293	6.93158	10.2211	0.00138841	0.0182982
174857	ROLler: helically twisted, animals roll when moving	2.11642	0.192036	10.2114	0.00139577	0.0183617
176753	hypothetical protein	0.449955	4.56996	10.2094	0.0013973	0.0183617
174257	SKp1 Related (ubiquitin ligase complex component)	0.510879	4.47059	10.2093	0.00139733	0.0183617
175920	Asparagine Linked Glycosylation (ALG) homolog, Nematode	0.388333	5.81593	10.209	0.00139754	0.0183617
192056	TRP (transient receptor potential) channel family	-0.615865	3.84923	10.2059	0.00139992	0.0183617
191187	Serpentine Receptor, class W	1.36303	-0.941089	10.2055	0.00140024	0.0183617
177284	EGF-like domain-containing protein C02B10.3	-0.424289	6.35543	10.2043	0.0014011	0.0183617
190374	Homolog of Hedgehog AcylTransferase	-0.546149	3.96738	10.2043	0.00140112	0.0183617
177187	Cuticle collagen dpy-13	1.34645	1.78657	10.202	0.00140291	0.0183722
186617	Calcineurin-like EF-Hand Protein Family member	-0.588085	3.62308	10.1997	0.00140467	0.0183823
24104193	C-type LECtin	-0.915783	0.589144	10.1957	0.00140767	0.0184086
181957	hypothetical protein	0.51727	5.22681	10.1918	0.00141063	0.0184344
177870	Protein Wnt-2	-0.522001	5.17453	10.1871	0.00141424	0.0184404
177981	Uncharacterized protein	0.392583	5.73972	10.1836	0.00141696	0.0184404
172002	hypothetical protein	-0.783634	5.14621	10.1829	0.00141746	0.0184404
181183	Protein dyf-7	-0.623691	5.08752	10.1826	0.00141775	0.0184404
4363079	Uncharacterized protein	0.372961	6.10609	10.182	0.00141818	0.0184404
259500	Probable mitochondrial pyruvate carrier 1	0.436251	4.97676	10.1819	0.00141827	0.0184404
174473	Tyrosine-protein kinase receptor cam-1	-0.378396	7.55911	10.1815	0.0014186	0.0184404
186292	F-box B protein	-0.880794	0.787025	10.1804	0.00141941	0.0184404
187239	COLlagen	2.28352	-0.110781	10.1796	0.00142002	0.0184404
172964	hypothetical protein	1.16856	0.286749	10.1764	0.00142252	0.0184504
175544	hypothetical protein	0.37468	6.75647	10.176	0.00142277	0.0184504
177422	SUPpressor	-0.353537	5.79055	10.1742	0.00142418	0.0184557
177457	Inosine-5'-monophosphate dehydrogenase	0.386407	6.61933	10.153	0.00144069	0.0186536
186361	F-box A protein	-0.655636	2.0451	10.152	0.00144145	0.0186536
179954	hypothetical protein	1.0863	0.498969	10.1488	0.00144394	0.0186729
174575	hypothetical protein	1.05656	1.85303	10.1411	0.00145	0.0187345
174775	PhytoChelatin Synthase	0.430315	4.3993	10.1389	0.00145174	0.0187345
181121	ASparagiNe Synthetase	0.5541	7.0165	10.1378	0.0014526	0.0187345
13222115	hypothetical protein	0.689967	1.97155	10.1376	0.00145274	0.0187345
183325	Glutamyl-tRNA(Gln) amidotransferase subunit B, mitochondrial	0.466189	4.19791	10.1358	0.00145419	0.0187402
175766	3-hydroxyisobutyryl-CoA hydrolase, mitochondrial	0.409104	6.00875	10.1321	0.00145706	0.0187625
172198	hypothetical protein	1.01542	3.54068	10.131	0.00145794	0.0187625
185071	F-box A protein	0.566461	3.04709	10.126	0.00146189	0.0188003
184790	SLC (SoLute Carrier) homolog	0.666315	2.70312	10.1197	0.0014669	0.0188517
172024	TU elongation Factor (EF-Tu), Mitochondrial	0.381431	5.82399	10.1106	0.0014742	0.0189325
181235	hypothetical protein	-0.586206	2.89708	10.106	0.00147785	0.0189663
177877	SPerm CHromatin enriched	1.13193	2.78877	10.1008	0.00148203	0.0189956
179344	Rap Guanine nucleotide Exchange Factor homolog	-0.533105	3.69732	10.1006	0.00148218	0.0189956
3565193	Uncharacterized protein	0.422089	5.25092	10.0978	0.00148448	0.019012
176454	TBC (Tre-2/Bub2/Cdc16) domain family	-0.518084	3.55164	10.0947	0.00148696	0.0190306
174983	hypothetical protein	0.414853	4.45697	10.0921	0.00148907	0.0190417
180319	hypothetical protein	0.538992	5.90114	10.0911	0.00148987	0.0190417
178708	Nuclear Hormone Receptor family	0.618033	2.84065	10.0824	0.00149689	0.0191183
172099	Him-Three Paralog	0.529446	5.92328	10.0787	0.00149989	0.0191435
176977	Hexosyltransferase	-0.840014	3.14846	10.0771	0.0015012	0.019147
178378	F-box A protein	-0.479333	3.28694	10.0725	0.00150501	0.0191699
190030	hypothetical protein	0.470466	3.75644	10.0702	0.0015069	0.0191699
176451	hypothetical protein	0.488242	7.0211	10.0699	0.00150709	0.0191699
188950	SeQueSTosome related	-1.35505	-0.347768	10.0699	0.00150712	0.0191699
176485	DeHydrogenases, Short chain	0.553215	4.39356	10.0642	0.00151181	0.0192164
191467	Serine/threonine-protein phosphatase	1.06589	2.88533	10.0511	0.00152257	0.01934
174006	CAlSYntenin/Alcadein homolog	-0.404326	7.5859	10.0444	0.00152814	0.0193975
181800	Activated in Blocked Unfolded protein response	3.06687	-2.13457	10.0426	0.0015296	0.0194027
175810	DNA polymerase theta	0.445249	5.97899	10.0374	0.00153395	0.0194348
174139	hypothetical protein	0.708401	1.65343	10.0366	0.00153461	0.0194348
181399	Probable calcium-binding mitochondrial carrier F17E5.2	-0.386687	4.67043	10.0358	0.00153526	0.0194348
185773	SKN-1 Dependent Zygotic transcript	-1.21298	0.260368	10.0345	0.00153632	0.019435
183201	hypothetical protein	-0.44804	4.06081	10.0307	0.00153956	0.0194578
186663	hypothetical protein	-0.476643	3.62553	10.0299	0.00154022	0.0194578
185478	F-box B protein	-0.695085	2.14369	10.0261	0.00154339	0.0194847
182393	BTB and MATH domain-containing protein 15	0.579937	3.80972	10.0245	0.00154467	0.0194876
187880	hypothetical protein	-1.27506	0.906558	10.0228	0.00154617	0.0194932
182297	Nuclear hormone receptor family member nhr-150	-0.649386	2.06119	10.0169	0.00155109	0.019542
172361	ATP-dependent RNA helicase glh-2	0.537103	6.48566	10.0138	0.00155372	0.019562
176161	Proteasome subunit beta type-1	0.379232	6.41365	10.0033	0.00156258	0.0196602
171914	MSH (MutS Homolog) family	0.53932	6.47493	10.0009	0.00156463	0.0196727
178295	Meiotic recombination protein rec-8	0.547926	5.72015	9.99543	0.00156929	0.0197179
190398	hypothetical protein	0.425182	5.0862	9.99026	0.0015737	0.0197437
3565295	MLt-TeN (mlt-10) related	-0.448844	5.27226	9.98907	0.00157472	0.0197437
175161	Beta-lactamase-like protein 2 homolog	0.370953	5.10343	9.98904	0.00157475	0.0197437
177896	Mitochondrial sorting homolog	0.409501	5.64601	9.98797	0.00157566	0.0197437
180465	hypothetical protein	-0.465174	4.74366	9.98682	0.00157665	0.0197437
180505	Homeobox protein ceh-39	-0.50864	4.62767	9.98054	0.00158204	0.0197888
173884	Major sperm protein 19/31/40/45/50/51/53/59/61/65/81/113/142	1.10778	1.84598	9.98014	0.00158238	0.0197888
177271	Uncharacterized protein	1.39164	0.640405	9.97854	0.00158375	0.0197926
182756	One cut domain family member	-0.502544	5.06332	9.97699	0.00158508	0.019796
178226	Uncharacterized protein	1.07212	1.27237	9.97194	0.00158944	0.0198266
190305	CUTiclin-Like	-0.655286	2.94246	9.97066	0.00159055	0.0198266
3564761	hypothetical protein	-0.65994	1.91198	9.97044	0.00159073	0.0198266
173135	hypothetical protein	-0.885959	1.33189	9.96821	0.00159266	0.0198373
175099	hypothetical protein	0.691693	1.57628	9.96068	0.00159919	0.0199053
178022	ATP-dependent RNA helicase SUV3 homolog, mitochondrial	0.414017	5.54686	9.9547	0.00160439	0.0199567
177808	GLutamiNe synthetase (glutamate-ammonia ligase)	0.486911	8.09986	9.95073	0.00160785	0.0199813
182063	Bestrophin homolog	-0.881726	0.680806	9.94998	0.00160852	0.0199813
181641	Abnormal pharyngeal pumping eat-20	-0.453634	6.04262	9.94661	0.00161146	0.0200045
191350	Uncharacterized protein	1.11001	1.36861	9.94244	0.00161512	0.0200365
177292	LAMinin related. See also lmb-	-0.473877	8.26266	9.93893	0.0016182	0.0200613
175581	C. Elegans Homeobox	-0.424064	5.36045	9.93625	0.00162056	0.0200772
171770	hypothetical protein	0.360207	6.59331	9.92968	0.00162635	0.0201355
178001	Protein lin-3	0.479695	4.88062	9.92673	0.00162896	0.0201544
186164	hypothetical protein	-0.898632	0.906248	9.92511	0.00163039	0.0201588
187902	hypothetical protein	0.566601	3.71908	9.92254	0.00163267	0.0201735
183775	C-type LECtin	0.471611	6.2446	9.9194	0.00163546	0.0201945
179793	hypothetical protein	0.351262	5.88411	9.91802	0.00163668	0.0201962
192067	TetraSPanin family	-0.582211	3.87017	9.91581	0.00163865	0.0202071
175506	Probable galactose-1-phosphate uridylyltransferase	0.468025	3.87424	9.91348	0.00164072	0.0202135
186642	pseudo	1.07443	-0.0391538	9.91279	0.00164134	0.0202135
188896	2 (Zwei) IG domain protein	-0.562212	3.91613	9.91114	0.00164282	0.0202183
175991	Chondroitin proteoglycan-2	0.611113	10.0175	9.90825	0.00164539	0.02022
176812	Transducer of Cdc42-dependent actin assembly protein 2 homolog	0.561131	5.18024	9.90777	0.00164582	0.02022
182495	Uncharacterized protein	1.48412	-0.615003	9.90629	0.00164715	0.02022
3896798	Uncharacterized protein	-0.650746	2.67129	9.90612	0.0016473	0.02022
174990	hypothetical protein	1.73232	1.45135	9.903	0.0016501	0.0202409
180530	Ras GTPase-activating protein gap-1	-0.446324	3.66691	9.89995	0.00165283	0.0202611
176036	hypothetical protein	0.45943	5.7256	9.89771	0.00165484	0.020268
180329	hypothetical protein	-0.681588	2.02749	9.8969	0.00165558	0.020268
4363025	F-box B protein	-0.893964	0.605268	9.89372	0.00165844	0.0202897
178095	ACyLtransferase-like	0.503428	4.8194	9.89107	0.00166083	0.0203055
173924	hypothetical protein	-0.380954	6.06404	9.88473	0.00166656	0.0203623
177732	Uncharacterized protein	0.835009	1.50726	9.88137	0.00166961	0.0203799
183304	Nuclear Hormone Receptor family	-1.4596	2.16474	9.88072	0.00167019	0.0203799
179589	Nuclear Hormone Receptor family	0.388562	6.05124	9.87949	0.00167131	0.0203802
184227	F-box B protein	-1.06341	-0.0587056	9.8759	0.00167458	0.0204066
176407	Probable glutamine synthetase	1.05549	1.97099	9.87257	0.00167761	0.0204302
177353	Uncharacterized protein	-0.484259	4.29671	9.86943	0.00168047	0.0204516
259420	F-box B protein	-0.766714	1.44186	9.86677	0.00168291	0.0204573
177265	Sperm-Specific family, class Q	0.96711	3.48186	9.86553	0.00168405	0.0204573
191600	hypothetical protein	-0.538191	3.46502	9.86429	0.00168517	0.0204573
183641	hypothetical protein	0.484119	4.56065	9.86412	0.00168534	0.0204573
171837	eLRR (extracellular Leucine-Rich Repeat) ONly	-0.426874	5.39419	9.85476	0.00169393	0.0205481
181771	Drosophila CRumBs homolog	-0.430041	6.20225	9.85217	0.00169632	0.0205637
175822	Aspartyl aminopeptidase	0.375497	6.96507	9.84977	0.00169853	0.0205771
172020	hypothetical protein	0.425568	4.71556	9.84796	0.0017002	0.020584
180622	Discoidin domain-containing receptor tyrosine kinase B	-0.485351	5.54225	9.84637	0.00170167	0.0205884
191964	Sperm-Specific family, class Q	1.15726	2.20081	9.84387	0.00170399	0.020603
172947	hypothetical protein	-0.545064	5.74997	9.83618	0.00171113	0.0206758
181086	Innexin-5	-0.441624	5.80962	9.83233	0.00171471	0.0207057
183113	F-box C protein	-1.33144	-0.308869	9.82995	0.00171693	0.0207176
3564894	hypothetical protein	0.490815	3.39307	9.82889	0.00171792	0.0207176
184865	B3GNT1, Beta-1,3-N-acetylGucosamiNylTransferase 1, homolog	2.29537	-1.32487	9.82637	0.00172027	0.0207325
177269	Sperm-Specific family, class Q	1.0317	4.15766	9.82391	0.00172258	0.0207468
172442	Asparagine--tRNA ligase, cytoplasmic	0.405897	6.78724	9.8222	0.00172418	0.0207526
177465	Uncharacterized protein	1.30044	-0.405861	9.81702	0.00172905	0.0207977
177375	Uncharacterized protein	-0.472366	5.15611	9.81583	0.00173016	0.0207977
173125	hypothetical protein	0.501057	5.31323	9.81456	0.00173136	0.0207987
179223	Probable V-type proton ATPase subunit H 1	0.573674	5.40588	9.81305	0.00173278	0.0208023
184206	Infection Response Gene	-0.948542	0.345285	9.80325	0.00174204	0.0208654
177945	CALmodulin related genes	-0.563939	3.69426	9.80287	0.0017424	0.0208654
176997	Protein SHQ1 homolog	0.469811	4.36814	9.80227	0.00174297	0.0208654
179915	Carboxylic ester hydrolase	-0.721593	2.17067	9.80137	0.00174382	0.0208654
172823	hypothetical protein	-0.363564	6.18296	9.80092	0.00174424	0.0208654
179994	hypothetical protein	-0.391939	5.6409	9.80015	0.00174497	0.0208654
174012	Glycine cleavage system P protein	0.360488	7.07054	9.79823	0.0017468	0.0208654
173129	hypothetical protein	-0.457311	5.65144	9.798	0.00174701	0.0208654
177350	Nuclear Hormone Receptor family	-0.351542	6.641	9.78829	0.00175627	0.0209474
175513	hypothetical protein	1.02932	2.63159	9.78774	0.0017568	0.0209474
177906	TransKeTolase homolog	0.459643	8.29026	9.78726	0.00175725	0.0209474
186177	hypothetical protein	0.970045	0.416388	9.78263	0.00176168	0.0209686
4363114	hypothetical protein	-0.547818	5.8641	9.78201	0.00176228	0.0209686
3565341	hypothetical protein	-0.940816	4.44426	9.78186	0.00176242	0.0209686
172787	hypothetical protein	1.16694	1.58041	9.77971	0.00176448	0.0209797
259463	hypothetical protein	-0.681962	1.95243	9.7764	0.00176766	0.0210041
187031	F-box B protein	-0.924231	0.868066	9.77339	0.00177056	0.0210251
176527	Zwei Ig domain protein zig-5	-0.482898	3.46381	9.77024	0.00177359	0.0210476
183238	hypothetical protein	0.457639	4.63406	9.76062	0.0017829	0.0211261
178201	Bloom syndrome protein homolog	0.459463	5.45579	9.76039	0.00178312	0.0211261
171960	Serine/threonine-protein phosphatase PP1-delta	1.03118	2.34006	9.75869	0.00178477	0.0211261
173377	hypothetical protein	-0.435598	4.90275	9.75726	0.00178616	0.0211261
180320	Fog Two (fog-2) Related	0.523188	4.01256	9.75726	0.00178616	0.0211261
172025	Conserved Oligomeric Golgi (COG) Component	0.355403	6.31109	9.75526	0.0017881	0.0211261
181261	Tyrosine-protein kinase abl-1	-0.349191	6.43561	9.75521	0.00178815	0.0211261
173622	SKN-1 Dependent Zygotic transcript	-0.802756	1.81399	9.74862	0.00179458	0.0211704
180360	hypothetical protein	-0.531953	5.10254	9.74788	0.0017953	0.0211704
185828	TWiK family of potassium channels	-0.64038	3.31799	9.74737	0.0017958	0.0211704
175667	F-box/SPRY domain-containing protein 1	0.373298	6.31668	9.74599	0.00179714	0.0211704
181229	myelin regulatory factor related	-0.353206	7.44679	9.74373	0.00179936	0.0211704
174706	hypothetical protein	-0.593368	2.97674	9.74371	0.00179937	0.0211704
178158	Palmitoyltransferase	0.37865	6.09124	9.74171	0.00180133	0.0211704
172211	C. Elegans Y-box	0.472862	8.43381	9.73888	0.00180411	0.0211704
175471	Peptidyl-prolyl cis-trans isomerase 9	0.540182	4.71963	9.73877	0.00180421	0.0211704
176584	human XPB (Xeroderma Pigmentosum complementation group B) related	0.407725	5.85584	9.7386	0.00180438	0.0211704
178278	Uncharacterized protein	0.442745	4.54807	9.73856	0.00180442	0.0211704
175148	hypothetical protein	0.508625	4.75908	9.73249	0.00181039	0.021227
180422	Translocon-associated protein subunit beta	-0.352741	7.57107	9.72966	0.00181318	0.0212463
177735	Ref/ALY RNA export adaptor family	-0.345336	5.79871	9.7222	0.00182056	0.0213028
172463	Argonaute protein wago-1	0.519011	8.40099	9.7214	0.00182135	0.0213028
177274	Major sperm protein 55/57	1.08949	3.05764	9.72131	0.00182144	0.0213028
181826	BTB and MATH domain containing	0.83104	2.30027	9.71937	0.00182336	0.0213119
171660	hypothetical protein	1.23138	0.456285	9.71289	0.0018298	0.0213737
173482	MATH (meprin-associated Traf homology) domain containing	-0.474622	5.22282	9.70302	0.00183966	0.0214754
266843	JunctoPHilin	-0.460184	6.37509	9.69731	0.00184538	0.0215287
182633	hypothetical protein	-0.754942	1.1495	9.69484	0.00184787	0.0215441
176228	TPR repeat-containing protein ZK370.8	0.383623	5.70735	9.69086	0.00185187	0.0215764
179257	SUPpressor	-0.389256	6.90056	9.68961	0.00185313	0.0215764
180418	NCAM (neural cell adhesion molecule) homolog	-0.440779	7.07802	9.68864	0.00185411	0.0215764
187341	hypothetical protein	0.622803	2.21582	9.68439	0.00185841	0.0215988
266887	hypothetical protein	0.521248	3.84855	9.68342	0.00185938	0.0215988
181741	hypothetical protein	-0.378391	7.49004	9.68328	0.00185952	0.0215988
173745	hypothetical protein	-0.946091	1.17869	9.67929	0.00186357	0.0216322
186278	hypothetical protein	0.576842	4.60919	9.66677	0.00187631	0.0217666
180533	Beta-hexosaminidase A	-0.640512	7.05884	9.66484	0.00187828	0.0217758
176209	DNA polymerase kappa	0.473878	6.00816	9.66259	0.00188058	0.0217765
186750	pseudo	1.29202	-0.557611	9.66145	0.00188175	0.0217765
190948	hypothetical protein	0.64187	2.3815	9.66034	0.00188289	0.0217765
179334	hypothetical protein	1.04949	0.465288	9.66021	0.00188302	0.0217765
259720	Tetraspanin	-0.382215	4.74746	9.65603	0.00188731	0.0218125
259717	Nematode Specific Peptide family, group C	-0.790604	2.91097	9.6516	0.00189186	0.0218516
13218078	hypothetical protein	0.923683	0.579117	9.64953	0.001894	0.0218528
177329	Receptor Mediated Endocytosis	0.59916	8.46748	9.64923	0.00189431	0.0218528
174328	GEX Interacting protein	0.481828	5.23914	9.64251	0.00190126	0.0219068
173307	Cation transporting ATPase	-0.432227	5.08381	9.64241	0.00190136	0.0219068
173110	hypothetical protein	-0.887769	3.94883	9.6388	0.00190509	0.0219343
176189	Sop-2-related protein 1	-0.346284	5.94743	9.63784	0.0019061	0.0219343
180527	Guanine nucleotide-binding protein alpha-5 subunit	-1.71436	-1.76271	9.63653	0.00190745	0.0219344
175453	GLYcosylation related	0.789005	0.906062	9.63502	0.00190903	0.0219344
174431	Mitochondrial import receptor subunit TOM40 homolog	0.334933	6.34536	9.63442	0.00190965	0.0219344
180127	Troponin I 3	-0.388772	5.86707	9.63014	0.0019141	0.021972
178908	hypothetical protein	0.376268	5.44409	9.61287	0.00193219	0.0221525
176483	Homolog of S. Pombe Rad	0.496389	3.95976	9.61285	0.00193221	0.0221525
183284	Electron transfer flavoprotein beta subunit lysine methyltransferase homolog	0.695649	2.14557	9.61022	0.00193497	0.0221705
181329	Troponin I 1	-0.521265	6.81348	9.60752	0.00193782	0.0221895
189697	hypothetical protein	-0.647965	3.42404	9.6026	0.00194302	0.0222353
174809	yeast DNA helicase/endonuclease family	0.457396	5.78708	9.58679	0.00195983	0.0224139
174491	ARRestin Domain protein	-0.72684	3.05326	9.57727	0.00197001	0.0225165
180309	ABHydrolase Domain containing homolog	0.35015	5.38005	9.57374	0.00197381	0.022546
177488	Uncharacterized protein	1.05365	0.87168	9.57203	0.00197564	0.0225531
188923	hypothetical protein	-1.08879	0.572552	9.57088	0.00197688	0.0225534
180427	GPCR Thermal Receptor	-0.767469	1.41297	9.56964	0.00197821	0.0225548
182735	hypothetical protein	-0.765224	1.59635	9.56761	0.00198041	0.022566
179863	hypothetical protein	-0.541687	9.46067	9.56569	0.00198247	0.0225757
179561	C-type LECtin	-0.376348	4.98086	9.56229	0.00198615	0.0226038
188812	Cyclin-dependent kinase 5 activator 1	-0.475492	4.99488	9.56082	0.00198774	0.022608
180126	hypothetical protein	-0.443253	5.58236	9.55856	0.00199019	0.022622
187242	hypothetical protein	0.604862	2.58876	9.55704	0.00199184	0.022627
191719	Nuclear Hormone Receptor family	-0.387912	4.69271	9.55417	0.00199496	0.0226485
176750	Kinesin-like protein	0.441672	7.17605	9.54723	0.00200252	0.0227205
181664	Warthog protein 4 N-product	-0.927611	5.95707	9.53559	0.00201525	0.0228426
176996	Probable tyrosyl-DNA phosphodiesterase	0.417912	4.77072	9.53515	0.00201574	0.0228426
180119	GlYcoGenin like	0.4798	7.35606	9.52691	0.00202481	0.0229314
175931	hypothetical protein	0.512392	4.4528	9.52253	0.00202965	0.022963
177326	SaPosin-like Protein family	-0.678499	2.67017	9.52215	0.00203007	0.022963
181022	A disintegrin and metalloproteinase with thrombospondin motifs adt-2	-0.357011	6.23675	9.51791	0.00203476	0.023002
186339	Uncharacterized protein	-1.69786	-0.659493	9.51555	0.00203738	0.0230177
172359	Protein-tyrosine-phosphatase	1.20939	0.371907	9.50771	0.00204611	0.0231023
183601	Uncharacterized protein	0.679886	3.27272	9.50515	0.00204896	0.0231205
173379	Bestrophin homolog	-0.475356	4.05942	9.50016	0.00205454	0.0231693
180291	Anillin-like protein 3	0.422226	5.56952	9.49648	0.00205866	0.0231824
180289	hypothetical protein	0.499804	6.52286	9.49594	0.00205927	0.0231824
179387	Putative stoned B-like protein	-0.548228	5.61606	9.49579	0.00205944	0.0231824
182419	Uncharacterized protein	-0.587093	3.09461	9.48918	0.00206687	0.0232452
181145	Solute carrier organic anion transporter family member	-0.526323	3.39314	9.48861	0.00206752	0.0232452
177915	Elongin-B/C E3 ligase in AXon guidance	-0.393582	6.96338	9.48577	0.00207072	0.0232671
172245	ATP-dependent RNA helicase glh-3	0.528846	5.07501	9.48243	0.00207449	0.0232857
175516	GLoBin related	-0.544014	3.16824	9.48209	0.00207487	0.0232857
174685	Protein-tyrosine-phosphatase	-0.397097	7.73175	9.46547	0.00209376	0.0234835
3564879	Heparan SulphoTransferase	-0.504147	3.62726	9.46195	0.00209778	0.0235062
178642	hypothetical protein	1.11628	1.37798	9.4614	0.00209841	0.0235062
186170	hypothetical protein	0.631888	4.46954	9.45955	0.00210052	0.0235062
183117	F-box C protein	-0.731309	2.85457	9.4589	0.00210127	0.0235062
174001	Ceramide glucosyltransferase 3	0.347185	7.11547	9.45817	0.00210211	0.0235062
180826	Mechanosensory protein 2	-0.510913	3.98136	9.45516	0.00210555	0.0235306
24105148	hypothetical protein	-0.913226	0.395422	9.45285	0.00210821	0.0235461
174642	hypothetical protein	0.965374	1.16951	9.45066	0.00211073	0.0235601
190304	hypothetical protein	-0.664841	2.32215	9.44826	0.00211349	0.0235768
179019	mammalian BCL (B cell lymphoma) gene homologs	-0.390463	6.76283	9.44528	0.00211693	0.023601
174707	Transcription factor lir-3	-0.556192	3.02528	9.44247	0.00212017	0.023623
179767	GLoBin related	-0.680199	3.15861	9.43742	0.00212602	0.0236675
178784	hypothetical protein	0.508034	2.79236	9.43676	0.00212679	0.0236675
177963	Na/Ca eXchangers	-0.378114	6.21478	9.43573	0.00212799	0.0236675
172183	DeHydrogenases, Short chain	-0.525856	3.08523	9.43181	0.00213253	0.0237039
184851	hypothetical protein	-1.1023	-0.00160763	9.42649	0.00213874	0.0237458
178899	hypothetical protein	0.408155	4.72586	9.42638	0.00213886	0.0237458
178918	Na/Ca eXchangers	-0.443479	7.30639	9.42447	0.00214109	0.0237564
179637	Gut-specific cysteine proteinase	-0.504959	10.8226	9.41846	0.00214812	0.0238202
186584	Putative histone H1.6	-1.11817	0.125314	9.41368	0.00215372	0.023868
176267	Putative RNA polymerase II subunit B1 CTD phosphatase R08D7.2	0.392375	5.22777	9.40488	0.00216409	0.0239687
184378	STarGazin (mammalian calcium channel) homolog	-0.734827	1.24542	9.40331	0.00216595	0.023975
189267	CTP synthase	0.372597	6.24566	9.39819	0.00217199	0.0240276
174931	hypothetical protein	0.390197	4.81457	9.38791	0.00218422	0.0241437
180265	Nuclear Hormone Receptor family	0.442387	4.30723	9.38718	0.00218509	0.0241437
189977	Putative T-box protein 37	-1.5356	-0.670308	9.38282	0.00219028	0.0241766
175591	UDP-glucuronosyltransferase	0.371182	4.88863	9.3825	0.00219067	0.0241766
181292	LIM Domain Binding protein	-0.440217	7.28546	9.38069	0.00219282	0.0241861
181555	hypothetical protein	-0.613526	7.22917	9.37176	0.00220354	0.0242899
174866	PARN (Poly(A)-specific RiboNuclease) homolog	0.421555	4.60125	9.36532	0.00221129	0.0243609
180013	hypothetical protein	0.371153	4.99513	9.3637	0.00221325	0.024368
175419	Detyrosinated tubulin alpha-3 chain	-0.439031	6.41872	9.36224	0.00221502	0.0243731
180552	hypothetical protein	-0.675422	5.0742	9.35981	0.00221795	0.0243909
173558	hypothetical protein	0.583667	3.76718	9.35587	0.00222273	0.024429
188565	F-box B protein	-0.82569	0.938191	9.35464	0.00222421	0.0244309
189162	Zinc finger protein ZPR1 homolog	0.3854	6.00636	9.35185	0.0022276	0.0244537
179089	Twenty One u-rna (21U-RNA) biogenesis Fouled Up	0.483234	5.09567	9.34909	0.00223096	0.024476
173550	hypothetical protein	-0.461634	4.12578	9.34346	0.00223783	0.0245098
3565030	FLavin Adenine Dinucleotide synthetase	0.378809	5.76786	9.34243	0.00223908	0.0245098
189961	Serpentine Receptor, class T	-1.39371	-1.11838	9.34195	0.00223967	0.0245098
178067	Glutamine-Fructose 6-phosphate AminoTransferase homolog	0.532859	8.05607	9.34174	0.00223993	0.0245098
173210	hypothetical protein	-0.496597	5.31778	9.34063	0.00224128	0.0245098
180268	F-box B protein	-0.730563	1.39399	9.34009	0.00224194	0.0245098
179806	Guanine nucleotide-binding protein alpha-17 subunit	-0.635609	3.1839	9.33764	0.00224494	0.0245282
174790	Threonine--tRNA ligase, cytoplasmic	0.381925	7.7935	9.33454	0.00224874	0.0245303
172179	Spermatocyte protein spe-11	0.973897	1.91075	9.33406	0.00224934	0.0245303
3565259	Zinc finger In Meiosis	0.509179	5.15006	9.33352	0.00225	0.0245303
175076	Carboxylic ester hydrolase	-0.504882	5.01925	9.33318	0.00225041	0.0245303
190810	hypothetical protein	-0.583304	2.82463	9.3275	0.0022574	0.024592
173885	#N/A	1.23668	0.64457	9.32143	0.00226489	0.0246592
176225	Uncharacterized NTE family protein ZK370.4	0.405418	7.35092	9.31861	0.00226838	0.0246626
186495	hypothetical protein	-0.473793	3.84312	9.31813	0.00226898	0.0246626
178556	hypothetical protein	0.346715	6.22247	9.31633	0.0022712	0.0246626
190167	F-box B protein	-0.675552	1.75939	9.31581	0.00227185	0.0246626
191653	Receptor-type guanylate cyclase gcy-25	-1.08805	-0.303323	9.31449	0.00227349	0.0246626
175620	High Incidence of Males (increased X chromosome loss)	0.418208	5.75069	9.31395	0.00227415	0.0246626
183889	hypothetical protein	0.485098	4.30835	9.31255	0.00227589	0.0246626
3565452	hypothetical protein	-0.837833	1.62664	9.31163	0.00227703	0.0246626
176781	hypothetical protein	0.488704	4.48529	9.31123	0.00227754	0.0246626
175333	hypothetical protein	1.57347	-1.05853	9.31039	0.00227858	0.0246626
178939	Cystic Fibrosis Transmembrane conductance regulator homolog	-0.528001	2.77788	9.30941	0.00227979	0.0246626
172990	hypothetical protein	-0.447123	5.74038	9.30741	0.00228229	0.0246752
3565014	AT hook Transcription Factor family	-0.388998	4.69033	9.30287	0.00228796	0.0247221
175118	MADF domain transcription factor	-0.550154	4.30309	9.2975	0.00229467	0.02478
171789	hypothetical protein	0.4265	5.66549	9.29555	0.00229711	0.02478
177814	Major sperm protein 78	1.056	2.10931	9.29539	0.00229731	0.02478
185951	F-box A protein	-0.691493	2.76992	9.29155	0.00230213	0.0247991
187420	hypothetical protein	0.566852	2.89852	9.29151	0.00230218	0.0247991
182982	Uncharacterized protein	1.11212	0.566909	9.29079	0.00230308	0.0247991
172497	Phorbol ester/diacylglycerol-binding protein unc-13	-0.444788	6.27271	9.28556	0.00230967	0.0248557
172173	DNaJ domain (prokaryotic heat shock protein)	0.441314	4.35266	9.28183	0.00231438	0.024892
180657	Putative protein tag-52	-0.358104	5.62733	9.27793	0.00231931	0.0249306
172766	hypothetical protein	-0.565736	2.78901	9.2765	0.00232113	0.0249357
171594	CDP-diacylglycerol--glycerol-3-phosphate 3-phosphatidyltransferase	0.425183	4.89621	9.27409	0.00232418	0.0249541
260109	Major Sperm protein Domain containing	1.16144	1.32722	9.27283	0.00232578	0.0249568
179870	hypothetical protein	-0.522879	4.27844	9.26199	0.00233959	0.0250804
176460	ATP-dependent zinc metalloprotease YME1 homolog	0.319203	6.236	9.26066	0.00234129	0.0250804
6418872	hypothetical protein	-0.72624	2.12533	9.26062	0.00234134	0.0250804
173282	human KALlmann syndrome homolog	-0.452395	5.48068	9.24846	0.00235693	0.0252329
3565884	hypothetical protein	0.415557	4.70618	9.24611	0.00235996	0.0252508
184811	hypothetical protein	-0.605321	2.75176	9.23216	0.00237801	0.0254292
172830	Ribonuclease 3	0.451226	6.06212	9.23098	0.00237954	0.025431
187778	hypothetical protein	-0.535892	3.60282	9.2287	0.00238251	0.0254481
172534	hypothetical protein	0.933497	2.24393	9.22605	0.00238596	0.0254703
176261	Globin-like protein	-0.416044	5.44286	9.22287	0.00239011	0.0255
178825	Neuropeptide-Like Protein	-0.441215	4.97957	9.21902	0.00239514	0.025539
190496	hypothetical protein	0.565346	3.27675	9.21783	0.00239669	0.0255409
191244	hypothetical protein	-1.45416	-1.08869	9.21505	0.00240034	0.0255651
180248	hypothetical protein	1.1925	0.720598	9.21396	0.00240176	0.0255657
187531	hypothetical protein	-0.536952	3.21547	9.20804	0.00240955	0.0256339
3565956	hypothetical protein	-0.565077	2.80151	9.20625	0.0024119	0.025637
175590	Cadherin-4	-0.420672	8.25898	9.20572	0.00241261	0.025637
178115	Uncharacterized protein	1.16943	0.727275	9.20382	0.0024151	0.0256489
171847	Major sperm protein	1.14982	-0.126338	9.20187	0.00241768	0.0256617
180035	Warthog protein 8 N-product	0.842089	0.679025	9.19201	0.00243074	0.0257856
185686	Zinc finger BED domain-containing protein 39	-0.484166	4.70991	9.18538	0.00243956	0.0258536
177951	PaTched Related family	0.409165	4.70684	9.1851	0.00243994	0.0258536
172716	hypothetical protein	1.11593	1.76379	9.18111	0.00244526	0.0258953
177512	Phosphate transporter	0.339993	7.49678	9.17805	0.00244935	0.0259238
177294	Probable peptide chain release factor 1, mitochondrial	0.390215	5.06429	9.17186	0.00245764	0.025982
179635	hypothetical protein	-0.433472	4.67252	9.17186	0.00245764	0.025982
172387	hypothetical protein	1.02854	2.31149	9.16989	0.00246029	0.0259952
182183	hypothetical protein	-0.657032	2.82694	9.16085	0.00247247	0.0261091
183568	hypothetical protein	0.608615	3.43212	9.15869	0.0024754	0.0261252
173979	Acyl CoA DeHydrogenase	1.12916	1.52745	9.15676	0.00247802	0.0261356
25502967	hypothetical protein	0.515634	4.60727	9.15588	0.0024792	0.0261356
176800	Acyl-Coenzyme A Binding Protein	0.401595	4.99069	9.14945	0.00248793	0.0261869
187995	MonoCarboxylate Transporter family	0.532912	4.62888	9.1489	0.00248868	0.0261869
179488	Double-strand break repair protein mre-11	0.477117	5.96571	9.14842	0.00248933	0.0261869
174662	SET domain-containing protein 14	0.403296	4.74729	9.14782	0.00249015	0.0261869
177351	Uncharacterized protein	0.465486	5.90608	9.14711	0.00249111	0.0261869
180988	hypothetical protein	-0.351766	6.52367	9.14532	0.00249355	0.0261977
175612	hypothetical protein	-0.38095	4.9625	9.14334	0.00249625	0.0261977
174447	Helix-loop-helix protein 3	-0.479587	3.91268	9.14237	0.00249758	0.0261977
178290	Uncharacterized protein	0.36704	5.08632	9.14174	0.00249844	0.0261977
172190	COenzyme Q (ubiquinone) biosynthesis	0.341729	5.81506	9.1412	0.00249917	0.0261977
178326	QUInine non-avoider	-0.525122	3.83761	9.13842	0.00250297	0.0262118
180902	COLlagen	-0.533526	6.72702	9.13815	0.00250335	0.0262118
176213	hypothetical protein	-0.363049	6.86896	9.134	0.00250902	0.0262565
174856	hypothetical protein	0.599015	3.28788	9.13094	0.00251322	0.0262857
177665	Uncharacterized protein	1.40456	-0.820891	9.12566	0.00252049	0.0263358
172321	hypothetical protein	0.406809	5.81104	9.1254	0.00252085	0.0263358
186392	DAAM (Disheveled-Associated Activator of Morphogenesis) homolog	-0.503204	4.51023	9.12414	0.00252259	0.0263392
187109	hypothetical protein	-0.911688	0.24379	9.12225	0.0025252	0.0263516
174248	Copine family protein 5	-0.398296	5.22592	9.11715	0.00253224	0.0263935
172435	hypothetical protein	-0.457424	5.94073	9.11706	0.00253237	0.0263935
178478	Uncharacterized protein	-1.29138	-0.481488	9.11627	0.00253347	0.0263935
171938	MSH (MutS Homolog) family	0.460876	6.02549	9.11369	0.00253703	0.0264158
180969	UDP-GlucuronosylTransferase	-0.539153	4.94391	9.10803	0.0025449	0.0264829
176259	Probable glutathione reductase 2	0.457836	3.68688	9.10293	0.00255201	0.0265166
189950	C-type LECtin	-1.47102	1.67344	9.10266	0.00255239	0.0265166
180705	#N/A	-0.314488	6.58539	9.10226	0.00255294	0.0265166
181284	hypothetical protein	-0.5892	5.58323	9.10161	0.00255384	0.0265166
174647	human PTB (hnRNP) homolog	-0.498044	5.36796	9.09936	0.00255699	0.0265345
173752	MeTHuselah (Drosophila aging-associated GPCR) homolog	0.4377	3.76915	9.09753	0.00255955	0.0265463
186714	SCP-Like extracellular protein	-3.87768	-2.73463	9.09553	0.00256235	0.0265604
184907	hypothetical protein	-0.64835	3.39716	9.09324	0.00256557	0.026579
178468	Methionine AminoPeptidase	0.362551	6.44893	9.08915	0.0025713	0.0266088
178112	Uncharacterized protein	-0.360655	4.91122	9.08915	0.00257131	0.0266088
4927023	Uncharacterized protein	-0.540621	5.59656	9.08512	0.00257698	0.0266527
176848	Paralyzed arrest at two-fold protein 6	-0.374757	6.38908	9.08276	0.0025803	0.0266635
173639	Receptor expression-enhancing protein	0.465284	5.88208	9.08234	0.0025809	0.0266635
187021	hypothetical protein	-0.505967	4.15091	9.0637	0.00260734	0.026917
3565243	AGRin (synaptic protein) homolog	-0.492819	5.98943	9.06301	0.00260833	0.026917
184917	hypothetical protein	0.400952	5.84162	9.06094	0.00261128	0.0269326
176754	Aspergillus NUclear Division related	0.389334	5.74272	9.05365	0.00262171	0.0270251
172884	Isoleucyl Amino-acyl tRNA Synthetase	0.38646	6.04152	9.04922	0.00262807	0.0270757
176631	DNA topoisomerase 3	0.426069	4.47874	9.04771	0.00263024	0.027083
180628	Probable endochitinase	-0.604976	7.23034	9.04548	0.00263345	0.0270931
188150	NADH-cytochrome b5 reductase	-0.86831	1.31878	9.04501	0.00263413	0.0270931
3565241	F-box B protein	-1.14421	-0.0908979	9.04349	0.00263632	0.0270999
175229	hypothetical protein	-0.556912	4.77193	9.04253	0.00263771	0.0270999
185787	F-box B protein	-0.922455	0.502598	9.04133	0.00263943	0.0271027
183223	Glycosyltransferase family 92 protein C35A5.5	-0.70265	2.61082	9.03664	0.00264621	0.0271573
3896875	hypothetical protein	-2.22349	-2.26772	9.03541	0.002648	0.0271606
174771	hypothetical protein	-0.396218	6.4175	9.03283	0.00265174	0.0271839
3565210	Vesicle transport protein	0.397717	4.52793	9.03034	0.00265535	0.0271995
189170	hypothetical protein	0.531682	4.59511	9.02914	0.0026571	0.0271995
191562	hypothetical protein	-0.805699	1.40043	9.02776	0.0026591	0.0271995
173172	eukaryotic Elongation Factor, SelenoCysteine-tRNA-specific	0.438815	4.08608	9.02776	0.0026591	0.0271995
3565799	hypothetical protein	0.348579	5.91894	9.0258	0.00266195	0.0272137
177045	NeuroGeNin	-0.542351	2.86188	9.02109	0.00266882	0.0272588
179058	hypothetical protein	-0.504559	5.94248	9.02077	0.00266929	0.0272588
181979	Probable ubiquitin-conjugating enzyme protein 17	-0.587966	2.33812	9.01828	0.00267293	0.0272809
187987	hypothetical protein	1.20593	1.18537	9.01576	0.00267662	0.0273036
180840	Regulator of G protein Signaling	-0.521246	4.51479	9.01376	0.00267955	0.0273184
179421	hypothetical protein	0.526078	5.69175	9.01274	0.00268104	0.0273187
188423	Zinc metalloproteinase nas-22	1.29121	-1.03903	9.00917	0.00268628	0.0273571
6418873	F-box A protein	-0.907433	1.07867	9.00554	0.00269162	0.0273965
189837	GABA B receptor subunit	-0.502605	4.49258	9.00405	0.00269382	0.0274038
182262	hypothetical protein	-0.694223	1.54804	9.00218	0.00269658	0.027417
177225	COLlagen	1.43739	-0.644596	9.0001	0.00269966	0.0274321
181282	hypothetical protein	-0.764638	1.22288	8.99917	0.00270102	0.0274321
3565104	hypothetical protein	0.968386	-0.11239	8.99437	0.00270813	0.0274892
172508	CHitin Synthase	0.52052	7.87611	8.99314	0.00270995	0.0274892
173293	Eyes absent homolog	-0.458644	5.06546	8.99167	0.00271213	0.0274892
180269	hypothetical protein	1.05909	1.92033	8.99139	0.00271255	0.0274892
180283	hypothetical protein	-0.605079	3.14496	8.98139	0.00272743	0.0276185
173362	PaTched Related family	-0.357632	6.11485	8.98045	0.00272884	0.0276185
172419	hypothetical protein	0.358763	6.20424	8.97982	0.00272977	0.0276185
183131	pseudo	1.39997	-1.13837	8.97687	0.00273418	0.0276481
188480	Nuclear hormone receptor family member nhr-127	-0.608116	2.45793	8.97253	0.00274068	0.0276988
173893	hypothetical protein	1.64764	-1.75316	8.96946	0.0027453	0.0277304
176195	Heat shock protein 110	0.421598	7.71904	8.95662	0.00276466	0.0279107
177964	ORC (Origin Recognition Complex) subunit	0.456179	5.5609	8.95472	0.00276754	0.0279247
178755	Protein lag-2	-0.998317	0.347339	8.95204	0.0027716	0.0279505
177275	Major sperm protein 19/31/40/45/50/51/53/59/61/65/81/113/142	1.08103	1.51902	8.94878	0.00277654	0.0279851
188277	Uncharacterized protein	0.958823	2.56117	8.94535	0.00278177	0.0280226
181504	Protein argonaute	-0.383505	7.94941	8.94252	0.00278608	0.0280509
176663	Serine/threonine-protein phosphatase	0.446203	5.52279	8.93912	0.00279128	0.028088
171909	hypothetical protein	0.488433	5.58373	8.93722	0.00279418	0.0281019
187521	hypothetical protein	0.547573	4.52641	8.93436	0.00279856	0.0281308
172431	CRAL/TRIO and GOLD domain containing	-0.326807	6.19364	8.93074	0.00280411	0.0281714
176735	hypothetical protein	0.501111	5.22856	8.92572	0.00281183	0.0282229
186090	BTB and MATH domain containing	0.513137	2.72921	8.92543	0.00281227	0.0282229
179695	hypothetical protein	-0.652485	5.01908	8.92104	0.00281904	0.0282756
182172	Nuclear Hormone Receptor family	-0.768749	0.78814	8.91904	0.00282213	0.0282913
173452	NHL (ring finger b-box coiled coil) domain containing	-0.379902	5.4608	8.91734	0.00282475	0.0283023
175873	ABC transporter, class F	0.327135	6.99959	8.91486	0.00282859	0.0283255
180070	hypothetical protein	0.39588	5.82625	8.91309	0.00283134	0.0283378
188993	BTB and MATH domain containing	0.941664	0.689038	8.90948	0.00283695	0.0283713
186726	#N/A	-2.01876	-2.16457	8.90897	0.00283774	0.0283713
4363053	T BoX family	-0.777569	0.944966	8.90275	0.00284742	0.0284343
172656	SLC (SoLute Carrier) homolog	0.36915	5.19942	8.90218	0.00284831	0.0284343
175422	hypothetical protein	-0.493286	6.32216	8.90136	0.00284958	0.0284343
185112	COLlagen	-0.468979	5.22136	8.90099	0.00285016	0.0284343
179681	Sperm Specific family, class P	1.04746	1.59707	8.89967	0.00285222	0.0284397
176837	PeRoxireDoXin	0.352555	4.85463	8.89744	0.0028557	0.0284591
173423	Calcium BiNding protein homolog	-0.614303	4.87655	8.89615	0.00285772	0.028464
178026	PeRoXisome assembly factor	0.362414	5.6378	8.8931	0.0028625	0.0284655
180570	hypothetical protein	-0.454765	6.29115	8.8916	0.00286485	0.0284655
178179	Uncharacterized protein	0.494716	6.0129	8.89061	0.00286641	0.0284655
24104572	Uncharacterized protein	2.23846	-2.1297	8.89045	0.00286665	0.0284655
172838	hypothetical protein	0.360019	5.67573	8.88997	0.00286742	0.0284655
179382	hypothetical protein	-0.541736	3.54011	8.88921	0.00286861	0.0284655
177787	Elongation of very long chain fatty acids protein	0.332741	7.91632	8.88716	0.00287184	0.0284655
184627	21U-RNA biogenesis factor pid-1	0.558088	3.7681	8.88652	0.00287283	0.0284655
171827	hypothetical protein	-0.319591	6.24627	8.88648	0.00287289	0.0284655
173716	hypothetical protein	1.05026	-0.0735791	8.88618	0.00287337	0.0284655
180695	Homeodomain-interacting protein kinase 1	-0.329796	7.29545	8.88408	0.00287668	0.0284655
190999	Uncharacterized protein	0.448943	4.63889	8.8828	0.0028787	0.0284655
179301	hypothetical protein	-0.596997	2.69889	8.88198	0.00287999	0.0284655
177401	Secreted Frizzled-Related Protein	-0.554251	3.99574	8.88163	0.00288054	0.0284655
180922	Probable muscarinic acetylcholine receptor gar-1	-0.516331	2.71074	8.88144	0.00288083	0.0284655
176346	hypothetical protein	-0.432322	3.9884	8.87974	0.00288353	0.0284769
189049	Carbonic AnHydrase	-0.56405	3.78408	8.87229	0.00289531	0.0285686
174212	K+/Cl-Cotransporter	-0.549996	3.93903	8.87062	0.00289797	0.0285686
189630	hypothetical protein	0.922545	0.266085	8.87026	0.00289853	0.0285686
181524	Serine/threonine-protein kinase akt-2	-0.344382	5.37242	8.86999	0.00289897	0.0285686
187782	hypothetical protein	-0.429297	5.04615	8.86903	0.00290049	0.0285686
174651	Cuticle collagen 39	-0.667009	5.1081	8.86715	0.00290348	0.0285748
179573	Glycosyltransferase family 92 protein F55C10.4	4.01566	-2.68691	8.8667	0.00290419	0.0285748
175486	hypothetical protein	-0.533186	3.96204	8.8654	0.00290627	0.0285801
24104889	Serpentine receptor class gamma-6	-2.4146	-2.41997	8.86408	0.00290837	0.0285856
176064	Protein CLASP-1	0.34084	6.63456	8.86253	0.00291084	0.0285895
180674	SUPpressor	-0.483056	6.04487	8.86191	0.00291183	0.0285895
175761	Dendrite extension defective protein 1	-0.542438	6.58086	8.86074	0.00291369	0.0285926
190138	hypothetical protein	1.38457	-0.363891	8.85438	0.00292386	0.0286773
259363	hypothetical protein	0.498466	2.78877	8.84638	0.00293671	0.0287881
174874	Polycomb protein sop-2	-0.336357	5.81055	8.84499	0.00293895	0.0287949
180334	INSulin related	-0.842667	1.59604	8.84157	0.00294446	0.0288337
174253	hypothetical protein	0.963427	1.88339	8.83985	0.00294724	0.0288457
172040	hypothetical protein	0.432469	7.17915	8.8354	0.00295443	0.0289009
172870	hypothetical protein	-0.421646	6.84445	8.83256	0.00295903	0.0289307
174402	Mediator of RNA polymerase II transcription subunit 13	-0.346762	7.75191	8.82941	0.00296414	0.0289443
177834	Sperm-specific class P protein 10	0.919126	2.38587	8.8292	0.00296449	0.0289443
177889	Uncharacterized protein	0.836025	1.53079	8.82882	0.00296509	0.0289443
172946	Regulator of telomere elongation helicase 1 homolog	0.454621	5.51966	8.82746	0.00296731	0.0289508
184847	Choline/EthanolaminePhosphoTransferase	0.381774	5.02638	8.82233	0.00297567	0.0290155
179146	Glycine Rich Secreted Protein	-0.603837	3.60393	8.82147	0.00297706	0.0290155
176351	hypothetical protein	0.601489	3.09591	8.81869	0.0029816	0.0290444
175335	Polyglutamine-repeat protein pqn-41	-0.318374	7.11316	8.81646	0.00298526	0.0290648
181153	Protein vav-1	-0.315003	6.07571	8.8113	0.0029937	0.0291302
3565564	Major sperm protein	1.39738	0.0760947	8.81035	0.00299526	0.0291302
171693	hypothetical protein	0.458002	4.02574	8.80929	0.00299701	0.0291302
183712	PDZ domain-containing protein C52A11.3	-1.37217	-1.19789	8.80854	0.00299824	0.0291302
173080	hypothetical protein	0.328514	5.61176	8.80461	0.0030047	0.0291777
188911	WHiTe (Drosophila) related ABC transporter	0.79694	1.18234	8.8012	0.00301033	0.0292171
181036	Tubulin beta-1 chain	-0.422276	6.19921	8.79506	0.00302046	0.0292873
176281	Glutathione S-transferase P	0.373694	6.96082	8.79419	0.00302191	0.0292873
190551	Uncharacterized protein	-0.43986	4.91922	8.79397	0.00302228	0.0292873
178038	Probable mitochondrial tRNA-specific 2-thiouridylase 1	0.546498	3.41771	8.78983	0.00302914	0.0293233
186233	hypothetical protein	0.817517	0.545838	8.78983	0.00302915	0.0293233
182043	Uncharacterized protein	0.471488	3.48858	8.78544	0.00303644	0.0293786
184330	hypothetical protein	2.71513	-1.11708	8.77955	0.00304626	0.0294583
24105057	hypothetical protein	1.28606	-0.752295	8.7768	0.00305086	0.0294875
180819	Drosophila Discs LarGe homolog	-0.438035	8.42874	8.77569	0.00305271	0.02949
177798	Uncharacterized protein	0.584061	2.77368	8.76593	0.0030691	0.0296329
177346	Tyrosine-protein kinase	1.28175	-0.288299	8.76384	0.00307261	0.0296514
183464	hypothetical protein	-0.376268	4.87953	8.75444	0.00308849	0.0297892
174326	hypothetical protein	-0.447343	6.47198	8.75047	0.00309523	0.0298387
172102	Rho GTPase Activating protein	-0.511165	3.1149	8.7454	0.00310383	0.0299062
173789	hypothetical protein	0.518688	4.35092	8.74227	0.00310918	0.0299175
190471	F-box B protein	-0.763446	1.26433	8.74132	0.00311079	0.0299175
187968	hypothetical protein	-0.489443	5.29107	8.74117	0.00311105	0.0299175
180453	CUTiclin-Like	-0.544389	3.42993	8.74094	0.00311145	0.0299175
189822	Uncharacterized protein	0.76797	1.24662	8.73359	0.00312401	0.0300228
266823	Poly [ADP-ribose] polymerase	0.433463	6.27756	8.72169	0.00314447	0.0302038
176802	Histone-lysine N-methyltransferase	-0.315261	7.49166	8.71784	0.00315111	0.0302475
180515	hypothetical protein	-0.383579	4.3498	8.71717	0.00315227	0.0302475
181480	Nuclear migration and anchoring protein unc-84	-0.412651	6.90525	8.71165	0.00316182	0.0303114
177593	Uncharacterized protein	1.61289	-0.467852	8.71144	0.00316219	0.0303114
191448	SKN-1 Dependent Zygotic transcript	-0.661943	1.74394	8.70288	0.00317708	0.030438
173849	Major sperm protein 19/31/40/45/50/51/53/59/61/65/81/113/142	1.05438	2.2879	8.70197	0.00317867	0.030438
189234	F-box B protein	-0.973607	-0.0817431	8.70064	0.00318098	0.0304444
179045	Daf-12, REdundant with	-0.412478	6.98733	8.69753	0.00318642	0.0304808
180520	ThioredoXin Domain Containing protein homolog	-0.4676	5.98131	8.69295	0.00319444	0.0305418
181994	hypothetical protein	-0.990318	2.73217	8.67949	0.00321811	0.0307305
172852	hypothetical protein	0.423899	6.05193	8.67917	0.00321867	0.0307305
3896779	Uncharacterized protein	-0.482654	4.94866	8.67891	0.00321913	0.0307305
3896785	Uncharacterized protein	-0.922446	1.08426	8.67753	0.00322157	0.030738
179555	Importin subunit alpha-1	0.384476	6.60043	8.67146	0.00323233	0.0308168
175586	Chondroitin proteoglycan 1	0.556955	9.46922	8.67099	0.00323315	0.0308168
173871	hypothetical protein	-0.378841	6.02312	8.66544	0.00324302	0.030894
187350	hypothetical protein	0.537378	4.54479	8.66457	0.00324457	0.030894
177268	Uncharacterized protein	1.01588	1.28843	8.65853	0.00325534	0.0309701
174079	eLRR (extracellular Leucine-Rich Repeat) ONly	-0.496153	4.07198	8.65822	0.00325589	0.0309701
3896822	hypothetical protein	0.532664	4.35965	8.65514	0.00326139	0.0310066
3565326	pseudo	-3.58163	-2.835	8.65272	0.00326573	0.031032
175329	hypothetical protein	0.388315	5.51295	8.64852	0.00327327	0.0310842
181787	hypothetical protein	-0.397126	6.4802	8.6478	0.00327457	0.0310842
186795	hypothetical protein	0.525729	3.23659	8.64546	0.00327878	0.0311038
180392	Nuclear RNAi defective-3 protein	-0.386535	6.35015	8.64479	0.00327999	0.0311038
182065	hypothetical protein	-1.38682	-1.12805	8.64229	0.00328448	0.0311306
259801	Major sperm protein 19/31/40/45/50/51/53/59/61/65/81/113/142	1.28447	0.29103	8.63892	0.00329057	0.0311724
172957	Mitochondrial Ribosomal Protein, Small	0.322195	6.0684	8.63627	0.00329535	0.0312018
3565041	hypothetical protein	-0.364544	4.96657	8.63452	0.00329851	0.0312158
181048	hypothetical protein	-0.739856	1.30359	8.63134	0.00330428	0.0312545
180420	MAP kinase-activating death domain protein	-0.352501	5.78789	8.62099	0.00332311	0.0314087
177806	Nuclear hormone receptor family member nhr-100	-0.4015	5.79222	8.62053	0.00332396	0.0314087
187991	hypothetical protein	-0.504074	3.96914	8.6193	0.00332621	0.031414
191456	hypothetical protein	-1.12924	-0.323084	8.61015	0.00334295	0.0315561
175698	T-box protein 2	-0.33308	5.70505	8.60538	0.00335171	0.0315935
177991	Uncharacterized protein	1.0045	2.5073	8.60529	0.00335188	0.0315935
179730	hypothetical protein	-0.492673	9.38963	8.60522	0.00335201	0.0315935
175480	hypothetical protein	0.479333	6.31805	8.60135	0.00335915	0.0316383
174021	hypothetical protein	-0.471702	4.7706	8.6007	0.00336033	0.0316383
176471	Stress-induced protein 1	0.52971	9.93705	8.59987	0.00336187	0.0316383
13220381	hypothetical protein	-0.674775	2.10234	8.59771	0.00336586	0.0316474
182971	Glutamate-gated ChLoride channel	-0.577506	3.37458	8.59751	0.00336624	0.0316474
174156	fatty Acid CoA Synthetase family	1.03024	0.963264	8.59546	0.00337002	0.031667
180036	hypothetical protein	0.416558	4.11263	8.59211	0.00337622	0.0316805
181270	hypothetical protein	-0.968091	0.0114865	8.59175	0.00337689	0.0316805
172889	Aryl hydrocarbon receptor nuclear translocator homolog	-0.313196	5.68133	8.59104	0.0033782	0.0316805
185001	PRogression Of Meiosis	0.51875	5.15857	8.591	0.00337828	0.0316805
172760	Protein lin-41	0.464905	7.57142	8.58704	0.00338563	0.0317232
180522	hypothetical protein	-0.302082	5.89268	8.58604	0.00338749	0.0317232
182722	hypothetical protein	-0.582019	3.86298	8.5852	0.00338907	0.0317232
176572	TWiK family of potassium channels	-0.475612	4.96358	8.58444	0.00339047	0.0317232
179811	hypothetical protein	0.376122	6.32188	8.58331	0.00339258	0.0317232
175884	hypothetical protein	-0.772063	1.48512	8.58295	0.00339326	0.0317232
172458	Helix Loop Helix	-0.394913	6.09119	8.58106	0.00339677	0.0317232
174320	COLlagen	-0.47758	6.51136	8.58048	0.00339787	0.0317232
172292	Nematode Specific Peptide family, group D	0.978976	2.42752	8.58031	0.00339818	0.0317232
13215068	hypothetical protein	-0.417849	4.67152	8.57799	0.00340251	0.0317418
186613	ASpartyl Protease	1.74945	-1.9161	8.57741	0.00340359	0.0317418
172346	SyNapTotagmin	-0.368196	6.31879	8.57548	0.0034072	0.0317595
176240	Integrin alpha pat-2	-0.422767	6.87944	8.57269	0.00341243	0.0317829
174164	Methylmalonic aciduria type A homolog, mitochondrial	0.347868	6.28368	8.57232	0.00341313	0.0317829
172353	M-phase inducer phosphatase cdc-25.1	0.415785	6.95115	8.56826	0.00342075	0.0318338
[truncated: 650 more rows]

## Sheet: SiO2vsControl
Supplementary data 1. Differentially expressed genes by edgeR in Group Ag and Group SiO2
EntrezID	Description	logFC	logCPM	LR	PValue	FDR
260235	hypothetical protein	4.08831	2.75421	169.068	1.18217e-38	2.2025e-34
182748	Protein containing ALS2cr12 (ALS2CR12) signature	-2.61701	2.17197	159.456	1.48769e-36	9.9387e-33
177399	BLIstered cuticle	3.40852	3.22903	159.311	1.60035e-36	9.9387e-33
174929	C-type LECtin	-1.87906	6.27089	143.073	5.66495e-33	2.63859e-29
174857	ROLler: helically twisted, animals roll when moving	4.76056	2.47618	133.002	9.02998e-31	3.36475e-27
179252	hypothetical protein	-2.08035	3.91438	124.873	5.42608e-29	1.54572e-25
260065	Downstream of Daf-Nineteen	-2.01374	4.45487	124.738	5.80753e-29	1.54572e-25
184366	COLlagen	4.14128	3.20623	120.502	4.91286e-28	1.14414e-24
190180	hypothetical protein	2.91562	1.17247	107.81	2.95848e-25	6.12438e-22
174370	COLlagen	3.25389	2.90039	107.536	3.3965e-25	6.32802e-22
4363012	Protein containing ALS2cr12 (ALS2CR12) signature	-2.84007	1.53031	99.5477	1.91491e-23	3.24334e-20
178247	Downstream Of DAF-16 (regulated by DAF-16)	-1.62986	8.04497	92.4705	6.8335e-22	1.06096e-18
183722	COLlagen	3.05034	2.83055	92.1184	8.16445e-22	1.17009e-18
24104282	COLlagen	4.27914	2.22182	89.5194	3.03648e-21	3.85405e-18
189000	Protein containing ALS2cr12 (ALS2CR12) signature	-2.69306	0.813249	89.4766	3.10293e-21	3.85405e-18
177748	COLlagen	3.10843	1.62416	88.372	5.42329e-21	6.31508e-18
173695	COLlagen	2.69657	3.01069	85.7666	2.02481e-20	2.21907e-17
186340	Uncharacterized protein	-1.80052	4.93757	84.7094	3.45601e-20	3.55224e-17
184866	Protein containing ALS2cr12 (ALS2CR12) signature	-1.81416	3.85187	84.6163	3.62259e-20	3.55224e-17
187239	COLlagen	4.57781	1.81518	83.5285	6.28051e-20	5.85061e-17
174990	hypothetical protein	3.71305	3.11346	83.1302	7.68216e-20	6.81554e-17
180590	C-type LECtin	-1.59269	4.66572	82.4045	1.10901e-19	9.39178e-17
6418775	Enhanced Olfactory Learning	-1.69031	2.8792	79.0877	5.94132e-19	4.81273e-16
177751	Uncharacterized protein	1.09148	7.9892	78.2542	9.06003e-19	7.03323e-16
190800	Uncharacterized protein	-1.57258	3.04932	77.7114	1.19252e-18	8.88716e-16
191032	F-box A protein	-2.27529	1.24416	74.5415	5.93782e-18	4.2549e-15
3565621	Protein containing ALS2cr12 (ALS2CR12) signature	-2.12054	0.701764	74.1564	7.21675e-18	4.97982e-15
184065	Enoyl-CoA Hydratase	1.40125	5.44312	73.7868	8.70263e-18	5.63351e-15
183775	C-type LECtin	-1.0068	5.59055	73.7719	8.76882e-18	5.63351e-15
178246	Uncharacterized protein	-2.8637	1.76958	73.619	9.475e-18	5.88429e-15
260226	ASpartyl Protease	-1.62659	2.57021	72.8504	1.39859e-17	8.40552e-15
172607	COLlagen	4.36266	2.47406	70.4629	4.69003e-17	2.73062e-14
185663	Uncharacterized protein	-1.61153	3.45019	68.834	1.07108e-16	6.04708e-14
179429	Lysozyme-like protein 2	-1.75977	7.20251	68.6716	1.16307e-16	6.37326e-14
187934	GRounDhog (hedgehog-like family)	1.53698	2.51299	68.0401	1.60206e-16	8.52799e-14
189995	hypothetical protein	2.51342	2.21722	65.0296	7.37827e-16	3.81846e-13
179825	COLlagen	2.73824	0.701182	64.9395	7.72317e-16	3.88893e-13
179812	COLlagen	2.97282	2.06694	63.8557	1.33877e-15	6.56385e-13
189654	C-type LECtin	-1.76111	2.23824	63.5325	1.57743e-15	7.53565e-13
172197	Cuticle collagen dpy-5	2.70591	3.02848	62.8279	2.25577e-15	1.05068e-12
259362	SaPosin-like Protein family	1.63584	4.81144	62.0857	3.28832e-15	1.49426e-12
179759	UDP-glucuronosyltransferase	0.97445	6.57513	62.0217	3.39695e-15	1.50687e-12
171681	SaPosin-like Protein family	1.96042	3.09155	61.3408	4.80031e-15	2.07987e-12
172445	COLlagen	2.49818	1.81301	59.168	1.44766e-14	6.12986e-12
179637	Gut-specific cysteine proteinase	0.880285	11.5744	58.5469	1.98499e-14	8.21828e-12
178187	THaumatiN family	1.04921	8.93967	58.4007	2.13817e-14	8.66004e-12
177187	Cuticle collagen dpy-13	2.91992	3.05461	57.5225	3.34136e-14	1.32453e-11
191611	BLIstered cuticle	3.11032	1.42399	56.3361	6.10834e-14	2.37092e-11
175170	COLlagen	4.09871	0.738159	55.1635	1.10908e-13	4.21701e-11
185829	hypothetical protein	-1.45262	2.87698	52.91	3.49188e-13	1.30114e-10
13217928	hypothetical protein	-1.94378	0.67049	50.2231	1.37223e-12	5.01294e-10
186770	hypothetical protein	3.24972	1.19703	50.1724	1.40818e-12	5.04533e-10
179803	COLlagen	1.79909	3.39663	49.8815	1.63321e-12	5.74119e-10
24104900	GRounDhog (hedgehog-like family)	1.23761	2.60448	49.1663	2.35158e-12	8.1134e-10
189944	C-type LECtin	1.33952	5.9085	48.9004	2.69301e-12	9.12245e-10
191105	dietary restriction over expressed	-1.55447	1.61605	48.6157	3.11364e-12	1.0359e-09
179428	Lysozyme-like protein 1	-0.949337	8.93165	48.5642	3.19655e-12	1.04482e-09
259335	COLlagen	1.65078	4.43392	48.4215	3.4378e-12	1.1043e-09
189288	Protein containing ALS2cr12 (ALS2CR12) signature	-1.36784	2.6139	48.0718	4.10895e-12	1.29752e-09
174336	COLlagen	1.17506	5.35526	47.784	4.75867e-12	1.47764e-09
182746	Protein containing ALS2cr12 (ALS2CR12) signature	-2.00074	0.716637	47.3294	6.00046e-12	1.8327e-09
174731	Cuticle collagen sqt-1	3.07637	2.25138	46.2525	1.03952e-11	3.12375e-09
182749	Protein containing ALS2cr12 (ALS2CR12) signature	-1.13313	3.71195	45.9393	1.21976e-11	3.6072e-09
177225	COLlagen	2.83387	0.37164	45.7782	1.32426e-11	3.85505e-09
178414	DumPY: shorter than wild-type	2.64446	3.20654	45.7366	1.35273e-11	3.87733e-09
178857	COLlagen	1.48178	5.74353	45.6414	1.42005e-11	4.00862e-09
191209	hypothetical protein	-1.38991	5.25159	45.1134	1.8595e-11	5.17079e-09
190173	hypothetical protein	2.09839	0.427128	44.4901	2.55649e-11	7.0044e-09
184523	hypothetical protein	-1.4033	1.96526	44.0082	3.26998e-11	8.82886e-09
178245	Downstream Of DAF-16 (regulated by DAF-16)	-0.924043	6.62528	43.9802	3.31716e-11	8.82886e-09
178611	hypothetical protein	0.87036	4.24531	43.3557	4.56407e-11	1.19765e-08
259661	hypothetical protein	3.3929	1.38802	42.8983	5.76608e-11	1.49205e-08
181903	Protein containing ALS2cr12 (ALS2CR12) signature	-2.20785	0.266602	42.6782	6.45261e-11	1.64683e-08
191381	C-type LECtin	-2.47408	0.957474	42.5075	7.04112e-11	1.77275e-08
185060	THaumatiN family	1.05501	5.77634	42.3138	7.7744e-11	1.93127e-08
185882	beta-LACTamase domain containing	0.949555	3.45198	41.954	9.34462e-11	2.29078e-08
173594	F-box A protein	-0.86975	4.7563	41.8643	9.78335e-11	2.36719e-08
189515	F-box A protein	-0.853747	4.32075	41.6818	1.07406e-10	2.5655e-08
176353	Probable peroxisomal acyl-coenzyme A oxidase 5	0.967552	6.79019	41.415	1.23108e-10	2.87696e-08
174650	Putative cuticle collagen 79	2.60877	0.0991526	41.4083	1.23534e-10	2.87696e-08
3565285	Protein containing ALS2cr12 (ALS2CR12) signature	-1.79254	0.868479	41.249	1.34023e-10	3.0827e-08
179350	hypothetical protein	4.76308	0.0360068	41.1559	1.40556e-10	3.19353e-08
186083	COLlagen	2.43229	2.14754	41.0423	1.48967e-10	3.34386e-08
189943	C-type LECtin	-2.28262	5.06735	40.7833	1.70079e-10	3.7723e-08
179869	Cub (CUB) Like Domain containing protein	-1.34061	5.37003	40.7155	1.76089e-10	3.85967e-08
183324	Cystatin	1.42605	1.94067	40.3285	2.14653e-10	4.65024e-08
186847	hypothetical protein	0.882942	4.17523	40.004	2.5344e-10	5.4274e-08
177177	Uncharacterized protein	-1.70016	0.630478	39.9609	2.59098e-10	5.48552e-08
178564	Downstream Of DAF-16 (regulated by DAF-16)	-1.16275	6.22504	39.8232	2.78027e-10	5.82013e-08
182745	hypothetical protein	-2.80882	-1.06824	39.5478	3.20122e-10	6.62689e-08
173888	Major sperm protein 49	1.45885	1.86726	39.4141	3.42804e-10	7.01845e-08
177033	Invertebrate-type lysozyme 3	1.46387	4.10617	39.3224	3.59292e-10	7.27605e-08
174928	C-type LECtin	-0.781582	8.10413	39.0688	4.09128e-10	8.19619e-08
178914	hypothetical protein	2.10207	2.72844	39.0216	4.19148e-10	8.3076e-08
183784	Protein containing ALS2cr12 (ALS2CR12) signature	-0.843439	4.34353	38.9563	4.33401e-10	8.49969e-08
188287	hypothetical protein	-1.61959	0.968838	38.6311	5.11972e-10	9.93599e-08
178203	Uncharacterized protein	-0.740973	5.43745	38.6036	5.19219e-10	9.97275e-08
178155	COLlagen	1.69286	5.64182	38.47	5.56022e-10	1.05707e-07
174686	COLlagen	1.76524	5.1959	38.4011	5.76012e-10	1.08401e-07
184216	C-type LECtin	1.23406	2.77624	38.2271	6.29711e-10	1.17321e-07
174096	hypothetical protein	-0.835563	6.87048	38.1394	6.5868e-10	1.21504e-07
183006	C-type LECtin	1.99931	1.17442	36.9081	1.2383e-09	2.26184e-07
7040172	hypothetical protein	-1.12453	2.39856	36.6816	1.39086e-09	2.51584e-07
179452	Cuticle collagen 13	1.97781	0.429562	36.4597	1.55853e-09	2.79202e-07
189185	hypothetical protein	1.11066	3.25287	36.2553	1.73091e-09	3.07129e-07
13182677	Protein containing ALS2cr12 (ALS2CR12) signature	-2.75198	-0.376346	36.0818	1.89207e-09	3.32559e-07
180301	Prolyl Carboxy Peptidase like	-0.842796	4.98703	35.6121	2.40789e-09	4.19265e-07
179863	hypothetical protein	-0.895708	9.34494	35.5815	2.446e-09	4.21957e-07
177593	Uncharacterized protein	1.91959	-0.200307	35.5084	2.5395e-09	4.34069e-07
3565680	fatty Acid CoA Synthetase family	1.53296	7.42697	33.7013	6.42573e-09	1.08834e-06
171698	hypothetical protein	0.923169	4.31393	33.2718	8.01368e-09	1.34507e-06
175294	F-box A protein	-0.987095	2.35367	33.0706	8.88737e-09	1.4784e-06
177447	Uncharacterized protein	-1.14755	8.89365	33.0404	9.02635e-09	1.48823e-06
177065	C-type LECtin	-0.658981	7.37912	32.658	1.09886e-08	1.79587e-06
177314	Putative glucosylceramidase 4	0.974627	6.24778	32.592	1.13681e-08	1.84173e-06
188845	hypothetical protein	-1.39717	3.43902	32.5487	1.16243e-08	1.867e-06
183785	Protein containing ALS2cr12 (ALS2CR12) signature	-1.25247	2.41779	32.419	1.24263e-08	1.97876e-06
174397	Cuticle collagen rol-6	2.20606	2.19444	32.2477	1.35717e-08	2.14283e-06
4363131	hypothetical protein	2.2257	-0.464589	31.8319	1.68109e-08	2.63196e-06
177193	Uncharacterized protein	1.81246	1.38212	31.5232	1.97067e-08	3.05963e-06
173179	Protein containing ALS2cr12 (ALS2CR12) signature	-1.67263	1.38072	31.3533	2.1509e-08	3.31186e-06
173996	hypothetical protein	-0.709837	5.36329	31.1577	2.37895e-08	3.63297e-06
178691	hypothetical protein	3.40452	0.704785	30.8688	2.76068e-08	4.18164e-06
180036	hypothetical protein	-0.852461	3.5481	30.6582	3.0773e-08	4.62364e-06
185375	O-ACyltransferase homolog	-1.19752	3.05632	30.4682	3.39386e-08	5.05849e-06
191742	Patterned Expression Site	0.941678	2.74312	30.4473	3.43069e-08	5.07279e-06
183739	hypothetical protein	-1.34257	0.696136	30.3816	3.54874e-08	5.20603e-06
186235	hypothetical protein	1.02446	2.52064	29.9965	4.32819e-08	6.29989e-06
181800	Activated in Blocked Unfolded protein response	5.07242	-0.818344	29.971	4.38564e-08	6.33402e-06
259316	hypothetical protein	1.19861	3.01574	29.893	4.56556e-08	6.54316e-06
13215782	Protein containing ALS2cr12 (ALS2CR12) signature	-0.987175	3.23858	29.8549	4.65621e-08	6.62213e-06
174126	Peroxisomal Membrane Protein related	0.664258	6.47295	29.4554	5.72183e-08	8.07602e-06
175649	GIPC (RGS-GAIP Interacting Protein C) homolog	1.16986	3.72274	29.4115	5.85287e-08	8.19885e-06
173844	Major sperm protein 33	1.19477	2.79029	29.3407	6.07079e-08	8.44067e-06
173382	SQuaT	2.08562	2.28676	29.2924	6.22404e-08	8.58964e-06
173720	hypothetical protein	-0.997728	3.92805	28.9853	7.29287e-08	9.99069e-06
187081	hypothetical protein	1.67729	0.550116	28.8983	7.62789e-08	1.03734e-05
177559	COLlagen	0.857006	5.59198	28.5513	9.12471e-08	1.2319e-05
353386	Nematode Specific Peptide family, group D	1.30347	1.42493	28.2974	1.04036e-07	1.39445e-05
172097	hypothetical protein	0.605822	6.78988	28.0987	1.15285e-07	1.5342e-05
171947	hypothetical protein	1.59268	0.661691	28.0034	1.21102e-07	1.60017e-05
188534	hypothetical protein	0.734626	4.86145	27.9747	1.22915e-07	1.61269e-05
187883	MATH (meprin-associated Traf homology) domain containing	-0.9178	3.33939	27.8475	1.31263e-07	1.71019e-05
174755	hypothetical protein	1.30142	2.23293	27.7052	1.41282e-07	1.82793e-05
259752	TetraSPanin family	-0.815406	3.30502	27.5454	1.53451e-07	1.97168e-05
178903	Activated in Blocked Unfolded protein response	5.97256	-0.698351	27.4157	1.6409e-07	2.09395e-05
174652	Putative cuticle collagen 80	0.780602	5.90154	27.2733	1.7663e-07	2.23864e-05
184954	hypothetical protein	1.42857	1.36483	27.1529	1.87986e-07	2.36646e-05
177153	C-type LECtin	1.22646	1.90863	26.8987	2.14403e-07	2.6809e-05
179059	hypothetical protein	0.807551	2.93863	26.8376	2.21287e-07	2.74853e-05
180298	C-type LECtin	0.631694	5.41674	26.7496	2.31602e-07	2.8576e-05
176276	hypothetical protein	-7.05048	1.38343	26.7001	2.37606e-07	2.91239e-05
175120	Sodium/potassium-transporting ATPase subunit alpha	1.10079	2.60311	26.4579	2.69352e-07	3.27993e-05
177648	Adenine Nucleotide Translocator	1.62407	0.747699	26.3987	2.7772e-07	3.35988e-05
174195	hypothetical protein	-0.855699	3.70117	26.211	3.06068e-07	3.67894e-05
177151	C-type LECtin	-0.83252	6.29779	26.1073	3.22953e-07	3.85701e-05
182747	Protein containing ALS2cr12 (ALS2CR12) signature	-1.24553	2.368	26.0001	3.41391e-07	4.05124e-05
178238	C-type LECtin	-0.802735	5.30752	25.9419	3.51854e-07	4.14898e-05
178884	hypothetical protein	0.860851	4.60229	25.7033	3.98137e-07	4.66522e-05
177865	GIPC (RGS-GAIP Interacting Protein C) homolog	1.10373	4.22451	25.6906	4.0078e-07	4.66683e-05
13180558	hypothetical protein	1.1777	2.98613	25.593	4.21559e-07	4.87831e-05
178390	Uncharacterized protein	1.17039	2.11754	25.4976	4.42943e-07	5.04411e-05
184058	hypothetical protein	-0.82773	5.49971	25.4975	4.4296e-07	5.04411e-05
186846	hypothetical protein	1.45085	0.78319	25.4929	4.44009e-07	5.04411e-05
177874	Major sperm protein 10/36/56/76	1.11076	3.5765	25.3629	4.74978e-07	5.36322e-05
181936	hypothetical protein	-1.30144	3.14396	25.2784	4.9623e-07	5.56944e-05
173983	Major sperm protein 19/31/40/45/50/51/53/59/61/65/81/113/142	1.22678	2.61933	24.9937	5.75191e-07	6.417e-05
191102	hypothetical protein	-1.30194	0.463797	24.8237	6.28218e-07	6.96687e-05
173583	Protein-tyrosine-phosphatase	1.22228	1.4345	24.7903	6.39178e-07	7.04647e-05
183557	Uncharacterized protein	1.64439	-0.0516422	24.4863	7.48409e-07	8.19562e-05
187412	hypothetical protein	-1.14646	5.62711	24.4765	7.52214e-07	8.19562e-05
188426	COLlagen	1.42754	0.47678	24.4389	7.67031e-07	8.30846e-05
179866	hypothetical protein	-0.754891	7.4935	24.3674	7.96033e-07	8.54104e-05
179215	C-type LECtin	-7.64735	-0.434491	24.3635	7.97671e-07	8.54104e-05
173890	Major sperm protein 19/31/40/45/50/51/53/59/61/65/81/113/142	1.11648	2.42907	24.3453	8.0525e-07	8.57293e-05
176528	COLlagen	1.07031	2.74041	24.3252	8.13679e-07	8.61344e-05
176947	COLlagen	0.872458	5.05335	24.2101	8.6379e-07	9.09225e-05
174653	Cuticle collagen bli-1	2.94405	1.102	24.0456	9.4081e-07	9.84732e-05
172289	MS Related Protein	1.1986	3.47909	24.0292	9.48866e-07	9.87616e-05
13206884	Uncharacterized protein	-2.0544	-0.870553	23.9684	9.79295e-07	0.000101362
173835	#N/A	1.2968	2.15801	23.9464	9.90536e-07	0.00010196
180035	Warthog protein 8 N-product	1.6209	1.21147	23.8701	1.0306e-06	0.000105501
175648	Major Sperm protein Domain containing	1.17655	3.21832	23.8219	1.05672e-06	0.00010754
177290	Uncharacterized protein	1.54931	0.780196	23.8056	1.06573e-06	0.00010754
191712	Major sperm protein 152	1.219	2.17132	23.8018	1.06784e-06	0.00010754
177802	Major sperm protein 10/36/56/76	1.05183	3.3264	23.7776	1.08136e-06	0.000108316
184798	B3GNT1, Beta-1,3-N-acetylGucosamiNylTransferase 1, homolog	4.10779	-0.310704	23.7315	1.10757e-06	0.000110348
183097	Uncharacterized protein	1.45044	0.995712	23.6724	1.14208e-06	0.00011308
187708	hypothetical protein	-1.39043	3.65958	23.6639	1.14713e-06	0.00011308
172534	hypothetical protein	1.04702	2.34655	23.6507	1.15505e-06	0.000113262
171967	C-type LECtin	1.0026	2.87015	23.6391	1.162e-06	0.000113346
173035	hypothetical protein	1.17804	1.67363	23.6207	1.17319e-06	0.000113842
174349	hypothetical protein	1.36679	0.442333	23.5721	1.20319e-06	0.000115779
186145	hypothetical protein	-0.6108	5.59379	23.5683	1.20558e-06	0.000115779
174101	hypothetical protein	-0.567986	5.70201	23.5356	1.22625e-06	0.00011716
173877	UPF0057 membrane protein C04G6.5	-0.786786	2.6427	23.4749	1.26553e-06	0.000120296
179907	hypothetical protein	1.08768	2.40008	23.4616	1.2743e-06	0.000120356
172324	hypothetical protein	1.08136	3.25428	23.4544	1.27907e-06	0.000120356
178193	COLlagen	0.812598	4.20057	23.4438	1.28617e-06	0.000120416
174226	Cuticle collagen 6	2.08642	2.61245	23.4051	1.31233e-06	0.00012225
184913	hypothetical protein	-1.32083	0.575028	23.3581	1.34475e-06	0.000124647
24104404	Uncharacterized protein	1.29549	2.49551	23.2759	1.40349e-06	0.000129448
188838	hypothetical protein	-1.92301	0.424827	23.2429	1.42776e-06	0.000131037
178086	LYSozyme	0.996818	8.83295	23.1498	1.49857e-06	0.000136433
186339	Uncharacterized protein	-2.95216	-0.853921	23.1465	1.50119e-06	0.000136433
178656	C-type LECtin	0.766475	3.7183	23.1277	1.51595e-06	0.000137105
180033	Cathepsin B-like cysteine proteinase 3	-0.683746	5.73832	23.0683	1.56348e-06	0.000140721
191276	hypothetical protein	1.09519	2.05588	23.0355	1.59035e-06	0.000142451
178449	Uncharacterized protein	1.52398	-0.0504647	22.9911	1.62755e-06	0.000145085
173982	Major sperm protein	1.33435	1.57116	22.9611	1.6531e-06	0.000146661
6418733	hypothetical protein	-1.48274	-0.179569	22.9314	1.67888e-06	0.000148243
259801	Major sperm protein 19/31/40/45/50/51/53/59/61/65/81/113/142	1.36055	0.383912	22.9197	1.68908e-06	0.00014844
176830	Uncharacterized protein	1.0807	3.14728	22.7685	1.82739e-06	0.000159841
177629	Uncharacterized protein	1.08692	3.04636	22.6887	1.90484e-06	0.000165837
177991	Uncharacterized protein	1.1209	2.61311	22.5358	2.06266e-06	0.000177988
177887	Major sperm protein 38	1.18704	1.96252	22.535	2.06352e-06	0.000177988
177830	Major sperm protein 10/36/56/76	1.29624	1.29553	22.4054	2.20749e-06	0.000189529
180928	Invertebrate LYSozyme	0.660221	9.1166	22.327	2.29956e-06	0.000195997
3565635	UBX-containing protein in Nematodes	1.29546	1.47754	22.3218	2.30579e-06	0.000195997
185827	hypothetical protein	1.67211	0.0388364	22.3111	2.31866e-06	0.000195997
177262	Uncharacterized protein	1.23092	2.51653	22.3051	2.32586e-06	0.000195997
172819	hypothetical protein	1.13262	3.21619	22.2972	2.33542e-06	0.000195997
186199	hypothetical protein	2.19026	-0.555582	22.2443	2.40075e-06	0.000200576
187940	Fasting Induced Lipase	-1.0354	7.768	22.2201	2.43119e-06	0.000202212
182266	hypothetical protein	1.00784	2.62271	22.1236	2.55653e-06	0.000211692
176894	Uncharacterized protein	-1.57872	1.36508	22.0594	2.64337e-06	0.000217914
189004	C-type LECtin	-0.977185	3.93366	22.025	2.69124e-06	0.000220884
3565809	hypothetical protein	1.92571	-0.714964	21.9928	2.73675e-06	0.000223633
260109	Major Sperm protein Domain containing	1.18074	1.37756	21.964	2.7782e-06	0.000226029
187079	Putative serine/threonine-protein kinase K06H7.1	1.67136	-0.316923	21.8711	2.91594e-06	0.000236204
175049	hypothetical protein	-1.04077	4.95025	21.7885	3.04416e-06	0.000245522
186063	Mucin Like Gene	-1.15002	1.27181	21.7648	3.08202e-06	0.000247504
7040171	hypothetical protein	1.16231	0.706132	21.643	3.28403e-06	0.000262595
177448	Uncharacterized protein	-0.774254	3.38109	21.5462	3.45405e-06	0.00027501
177878	Uncharacterized protein	1.06183	4.11456	21.4086	3.71105e-06	0.000294215
183956	MS Related Protein	1.26823	0.543945	21.2973	3.93289e-06	0.000310481
177843	Sperm-Specific family, class S	1.04251	3.31388	21.2642	4.00126e-06	0.000314546
185542	hypothetical protein	1.29648	0.802692	21.2407	4.05061e-06	0.000316283
190365	Protein containing ALS2cr12 (ALS2CR12) signature	-1.60946	-0.298361	21.2298	4.07381e-06	0.000316283
176721	COLlagen	0.845444	5.52857	21.2296	4.07428e-06	0.000316283
259901	ACid Phosphatase family	1.50208	-0.391933	21.0991	4.36123e-06	0.000337154
173834	hypothetical protein	1.1448	2.89868	21.0318	4.51723e-06	0.000347771
171960	Serine/threonine-protein phosphatase PP1-delta	1.0307	2.3692	20.9272	4.77083e-06	0.000365783
178934	hypothetical protein	-0.619116	7.16102	20.7832	5.1432e-06	0.000392717
171842	hypothetical protein	1.04374	2.62087	20.7555	5.21826e-06	0.000396276
182122	hypothetical protein	1.16213	1.3389	20.7457	5.24491e-06	0.000396276
177916	Uncharacterized protein	1.05302	4.2281	20.7425	5.25361e-06	0.000396276
177842	Uncharacterized protein	1.29927	1.36607	20.6968	5.38052e-06	0.000404212
182416	Uncharacterized protein	1.22183	1.51746	20.6795	5.42941e-06	0.000406247
186843	hypothetical protein	4.26179	1.41883	20.613	5.62144e-06	0.000418932
190596	hypothetical protein	-1.11243	1.03122	20.5969	5.66889e-06	0.000420785
177305	Major sperm protein 19/31/40/45/50/51/53/59/61/65/81/113/142	1.34881	1.10226	20.5819	5.71352e-06	0.000422415
178565	hypothetical protein	-1.36878	0.614382	20.558	5.78521e-06	0.000426025
179053	Cathepsin B-like cysteine proteinase 4	0.506323	10.9508	20.4612	6.08537e-06	0.000444741
184982	hypothetical protein	-1.5901	1.58996	20.4606	6.08711e-06	0.000444741
178314	Uncharacterized protein	1.51521	-0.0558345	20.45	6.12108e-06	0.000445476
192096	Tetraspanin-1	-0.672923	3.72551	20.4226	6.20936e-06	0.000449146
180083	hypothetical protein	1.33029	0.610395	20.4194	6.21972e-06	0.000449146
182409	hypothetical protein	-0.713265	5.3656	20.3023	6.61207e-06	0.000475635
178197	Sperm Meiosis PDZ domain containing proteins	1.04785	2.2053	20.2851	6.67189e-06	0.000478092
181961	O-ACyltransferase homolog	1.13932	0.860501	20.262	6.75286e-06	0.000482041
177844	Major sperm protein 77/79	1.23743	1.34892	20.2441	6.81624e-06	0.000484708
179451	hypothetical protein	1.26537	2.1443	20.2183	6.90901e-06	0.000489436
173099	hypothetical protein	1.03878	3.10847	20.1469	7.1717e-06	0.000506121
174923	Sodium-dependent transporter snf-5	1.12922	2.68444	20.1379	7.20528e-06	0.000506572
184052	UDP-GlucuronosylTransferase	-0.940674	1.33264	20.1069	7.32307e-06	0.000512918
178225	Uncharacterized protein	0.905292	1.90006	20.0697	7.46687e-06	0.000521031
179771	Lipase	0.497092	8.12222	19.9304	8.03146e-06	0.000558336
191630	hypothetical protein	1.33356	0.401933	19.8948	8.18229e-06	0.0005652
173082	hypothetical protein	1.49413	0.551725	19.8928	8.19086e-06	0.0005652
177828	Major sperm protein 10/36/56/76	1.59883	0.042731	19.8729	8.27653e-06	0.000569004
184821	Serpentine Receptor, class J	-1.09788	1.06556	19.8402	8.41945e-06	0.000576701
172716	hypothetical protein	1.23001	1.87464	19.8082	8.56145e-06	0.00058428
190929	hypothetical protein	1.13983	1.63954	19.7765	8.70461e-06	0.000591882
182139	Activated in Blocked Unfolded protein response	3.88953	-0.664887	19.7603	8.77875e-06	0.000594752
186361	F-box A protein	-0.953598	1.94905	19.7071	9.0265e-06	0.000609321
266855	Tyrosine-protein kinase	1.1386	1.65141	19.6973	9.07274e-06	0.000610232
188557	Serine/threonine-protein phosphatase	1.51587	-0.10549	19.6105	9.49443e-06	0.000636298
191739	Onchocerca Related Antigen family	2.5787	-0.159661	19.5991	9.55132e-06	0.000637816
182013	hypothetical protein	-0.859151	2.83023	19.5743	9.67612e-06	0.000642927
180960	COLlagen	1.2701	1.14958	19.5702	9.69687e-06	0.000642927
182608	hypothetical protein	1.06329	2.40816	19.4715	1.02112e-05	0.000674629
188965	Protein-tyrosine-phosphatase	1.28495	1.31623	19.4238	1.04693e-05	0.000689235
3565028	hypothetical protein	1.89807	-0.686096	19.412	1.05341e-05	0.000691059
172489	hypothetical protein	1.03571	3.05557	19.3944	1.06316e-05	0.000695007
6418818	hypothetical protein	0.816194	3.08351	19.3655	1.07939e-05	0.00070315
173804	hypothetical protein	1.10486	1.92058	19.276	1.13118e-05	0.000733716
175551	SUPpressor	-0.520329	9.31609	19.271	1.13419e-05	0.000733716
191443	hypothetical protein	0.984792	1.92821	19.263	1.13889e-05	0.000734212
182442	Uncharacterized protein	1.45264	0.705843	19.2118	1.16986e-05	0.000751572
183345	SCP-Like extracellular protein	-7.07568	-0.855199	19.1476	1.20987e-05	0.000774609
173404	Activated in Blocked Unfolded protein response	0.853888	3.4419	19.0971	1.24235e-05	0.000792678
184261	Nematode Specific Peptide family, group B	1.14142	0.67605	19.074	1.25744e-05	0.000797877
186056	Downstream Of DAF-16 (regulated by DAF-16)	-0.638728	6.13892	19.0716	1.25906e-05	0.000797877
176759	Receptor expression-enhancing protein	1.21405	0.99531	19.0212	1.29277e-05	0.00081646
179728	Probable cytochrome c 2.2	1.14552	1.64515	19.002	1.30584e-05	0.00082193
4363016	Major sperm protein	2.84413	-1.77485	18.9249	1.35964e-05	0.000850326
25502968	hypothetical protein	2.03881	0.353669	18.9243	1.36008e-05	0.000850326
188802	Prion-like-(Q/N-rich)-domain-bearing protein	0.910854	2.17018	18.9175	1.36495e-05	0.000850517
185631	hypothetical protein	1.41837	0.0942644	18.8189	1.43737e-05	0.000892655
181660	hypothetical protein	0.751196	3.12938	18.811	1.44329e-05	0.000893352
178578	hypothetical protein	1.34317	1.6015	18.7861	1.46225e-05	0.000902094
192002	Seven TM Receptor	-4.66988	-2.49462	18.6737	1.5511e-05	0.000953745
179983	#N/A	1.20277	0.94338	18.6523	1.56858e-05	0.00096132
174732	Regulator of Microtubule Dynamics	1.20413	2.15913	18.6226	1.59318e-05	0.000973199
179244	GRounDhog (hedgehog-like family)	0.644881	5.09455	18.604	1.60879e-05	0.000979521
172315	hypothetical protein	1.37396	0.222954	18.5189	1.68226e-05	0.00102092
186936	Uncharacterized protein	-6.25617	-1.54238	18.5039	1.69553e-05	0.00102563
191366	Tyrosine-protein kinase	1.35357	0.010583	18.4502	1.74403e-05	0.00105155
191467	Serine/threonine-protein phosphatase	1.05496	2.90133	18.4074	1.78367e-05	0.0010694
177966	Sperm-specific class P protein 34	0.967176	1.43451	18.4011	1.78955e-05	0.0010694
173884	Major sperm protein 19/31/40/45/50/51/53/59/61/65/81/113/142	1.25528	1.97683	18.3997	1.79086e-05	0.0010694
182755	Uncharacterized protein	-1.21686	3.61147	18.3365	1.85129e-05	0.00110196
175579	hypothetical protein	0.830281	1.91992	18.3051	1.88203e-05	0.00111669
184099	SCP-Like extracellular protein	-6.71051	-1.17797	18.2983	1.8888e-05	0.00111715
174873	hypothetical protein	1.27037	1.36724	18.1527	2.03877e-05	0.00120204
185887	hypothetical protein	2.30063	-1.4769	18.109	2.08614e-05	0.00122609
191146	Dauer or Aging adult Overexpression	3.26292	-0.600043	18.0944	2.10222e-05	0.00123079
182791	hypothetical protein	1.41019	0.793741	18.0897	2.10736e-05	0.00123079
180248	hypothetical protein	1.38839	0.890861	18.0765	2.12208e-05	0.00123552
180332	Protein-tyrosine-phosphatase	1.23002	2.25855	18.0259	2.17924e-05	0.00126484
177346	Tyrosine-protein kinase	1.45423	-0.130071	17.9881	2.2229e-05	0.00128618
177835	Sperm-Specific family, class Q	0.928939	3.52562	17.9569	2.25961e-05	0.00130227
178543	hypothetical protein	-0.563664	5.08046	17.9526	2.26469e-05	0.00130227
176213	hypothetical protein	-0.481367	6.83312	17.9017	2.32607e-05	0.00132969
176154	hypothetical protein	1.32562	0.717345	17.9013	2.32665e-05	0.00132969
172228	Protein-tyrosine-phosphatase	1.22627	0.892178	17.8796	2.35325e-05	0.00133718
188528	hypothetical protein	1.58507	0.0334541	17.8789	2.35411e-05	0.00133718
13180429	hypothetical protein	1.22114	0.871509	17.8709	2.3641e-05	0.00133877
183078	Protein containing ALS2cr12 (ALS2CR12) signature	-0.680352	3.86213	17.7725	2.4895e-05	0.00140431
172571	Protein-tyrosine-phosphatase	1.22767	1.25223	17.7684	2.49492e-05	0.00140431
176370	Putative sodium/calcium exchanger 7	-0.562387	4.66321	17.7426	2.52901e-05	0.00141891
177310	Uncharacterized protein	1.32123	1.33962	17.7318	2.54342e-05	0.00141891
191549	Histone H2A	1.11211	1.21603	17.7316	2.54369e-05	0.00141891
178243	Uncharacterized protein	-1.01036	4.08933	17.7218	2.55677e-05	0.00142194
178009	Uncharacterized protein	-6.55972	-1.29602	17.6845	2.60746e-05	0.00144582
172386	hypothetical protein	1.08775	1.47368	17.6545	2.64892e-05	0.00146445
177271	Uncharacterized protein	1.31154	0.643292	17.6327	2.67944e-05	0.00147694
180348	TransThyretin-Related family domain	1.20942	0.54789	17.5976	2.72936e-05	0.00149623
173627	hypothetical protein	-4.71123	-0.434727	17.5968	2.73049e-05	0.00149623
178521	C-type LECtin	-4.14272	0.0526487	17.5548	2.79142e-05	0.00152296
4363071	C-type LECtin	0.710119	4.48851	17.552	2.79562e-05	0.00152296
187728	Prion-like-(Q/N-rich)-domain-bearing protein	1.23905	1.18726	17.4925	2.88448e-05	0.00156678
184489	Bestrophin homolog 12	1.85902	-1.25384	17.4727	2.91468e-05	0.00157859
174253	hypothetical protein	0.975743	1.92254	17.4466	2.95498e-05	0.00159577
188121	hypothetical protein	1.1367	0.956346	17.4188	2.99853e-05	0.00161178
190896	Uncharacterized protein	1.48995	-0.189255	17.4129	3.00771e-05	0.00161178
177265	Sperm-Specific family, class Q	0.952058	3.49599	17.4111	3.01057e-05	0.00161178
175779	BAS-Like	1.23389	0.776479	17.3599	3.09279e-05	0.00165105
187013	hypothetical protein	0.958306	1.76212	17.3254	3.14943e-05	0.00167649
182399	F-box A protein	-0.766497	3.8871	17.3031	3.1866e-05	0.00169144
184322	Protein-tyrosine-phosphatase	1.50261	0.0718581	17.2448	3.28599e-05	0.00173405
173009	C-type LECtin	-5.99329	-1.74335	17.2436	3.28798e-05	0.00173405
179432	hypothetical protein	-0.871069	4.69621	17.2397	3.2948e-05	0.00173405
184725	hypothetical protein	1.11413	0.838519	17.2153	3.33738e-05	0.00175152
174772	hypothetical protein	-0.736755	6.72799	17.2001	3.36414e-05	0.00176044
180126	hypothetical protein	-0.522999	5.56387	17.195	3.37329e-05	0.00176044
172387	hypothetical protein	1.07866	2.37692	17.1485	3.45691e-05	0.00179904
172198	hypothetical protein	1.00058	3.55045	17.0999	3.54642e-05	0.00184048
179871	hypothetical protein	-0.723061	3.55629	17.0659	3.61048e-05	0.00186853
180269	hypothetical protein	1.16245	2.02441	17.0595	3.62268e-05	0.00186965
173981	Major sperm protein 19/31/40/45/50/51/53/59/61/65/81/113/142	1.11631	2.23131	16.9381	3.86194e-05	0.00198762
178226	Uncharacterized protein	1.08695	1.3141	16.9132	3.9129e-05	0.00200435
173011	C-type LECtin	-3.28604	-0.694415	16.9117	3.91596e-05	0.00200435
184140	hypothetical protein	2.33462	-1.44643	16.9037	3.93258e-05	0.00200458
178389	Uncharacterized protein	0.994204	3.22519	16.9011	3.93793e-05	0.00200458
191294	Major sperm protein	1.56587	-0.0296929	16.8741	3.99423e-05	0.0020277
260220	hypothetical protein	0.891398	2.54639	16.8655	4.01247e-05	0.0020285
172575	hypothetical protein	1.08412	1.41629	16.8581	4.02803e-05	0.0020285
172709	Major sperm protein	1.08239	2.79613	16.8579	4.02847e-05	0.0020285
173865	hypothetical protein	1.21174	0.861307	16.8464	4.05296e-05	0.00203116
176413	Uncharacterized F-box protein C05B5.5	-0.917417	1.81888	16.8452	4.05557e-05	0.00203116
176607	hypothetical protein	1.55304	-0.510971	16.8292	4.08981e-05	0.00204282
172525	hypothetical protein	-0.519828	6.62736	16.7958	4.16255e-05	0.0020736
181623	hypothetical protein	-0.495635	6.66167	16.7775	4.2028e-05	0.00208806
173830	Major sperm protein 19/31/40/45/50/51/53/59/61/65/81/113/142	1.0092	2.96512	16.7395	4.28786e-05	0.00212421
190573	Solute carrier organic anion transporter family member	-0.507177	5.7728	16.7349	4.29835e-05	0.00212421
184865	B3GNT1, Beta-1,3-N-acetylGucosamiNylTransferase 1, homolog	3.46226	-0.435181	16.707	4.36189e-05	0.0021499
186875	Sugar transporter SWEET1	-0.560937	4.74104	16.6996	4.37909e-05	0.00215268
172828	Tyrosine-protein kinase	1.34321	0.249514	16.6923	4.39601e-05	0.00215532
173881	hypothetical protein	1.1051	1.02564	16.6783	4.42843e-05	0.00216551
185281	C-type LECtin	-6.36705	-1.42779	16.6671	4.45464e-05	0.00217263
177487	COLlagen	0.646661	3.81191	16.637	4.52589e-05	0.00220162
174897	hypothetical protein	0.964164	2.55505	16.6052	4.60253e-05	0.00223306
171830	MS Related Protein	1.26882	0.465774	16.5892	4.64148e-05	0.00224612
181308	COLlagen	0.526972	5.80921	16.5835	4.65552e-05	0.00224707
178589	hypothetical protein	1.21966	0.699532	16.5657	4.69944e-05	0.00226241
172787	hypothetical protein	1.25133	1.6792	16.5133	4.83097e-05	0.00231974
177831	Nematode Specific Peptide family, group D	0.963424	2.75199	16.5081	4.84416e-05	0.00232009
187666	fatty Acid CoA Synthetase family	1.38424	-0.29427	16.4679	4.94795e-05	0.00236373
177291	Uncharacterized protein	1.41747	0.0307547	16.4006	5.12691e-05	0.00244295
179479	hypothetical protein	0.847035	2.47301	16.3829	5.1751e-05	0.00245962
175513	hypothetical protein	1.03161	2.66032	16.3675	5.21732e-05	0.00247338
178560	Piwi-like protein	1.2542	0.923116	16.3362	5.30417e-05	0.00250573
3565029	hypothetical protein	-1.57656	0.460907	16.3332	5.31246e-05	0.00250573
177307	Major sperm protein	1.20288	0.514557	16.3115	5.37356e-05	0.00252385
266839	Tyrosine-protein kinase	1.2957	0.361423	16.31	5.37797e-05	0.00252385
178332	Uncharacterized protein	1.15768	0.773706	16.2352	5.59455e-05	0.002616
177827	Major Sperm Protein	1.04673	3.34173	16.2325	5.6024e-05	0.002616
174575	hypothetical protein	1.0908	1.91257	16.2046	5.68555e-05	0.00264819
179980	Nematode Specific Peptide family, group A	1.19987	0.956505	16.1823	5.75296e-05	0.0026729
175611	hypothetical protein	1.24463	0.563157	16.1673	5.79852e-05	0.00268737
179545	Neuropeptide-like protein 33	0.530603	4.70886	16.1237	5.93382e-05	0.00274325
183897	hypothetical protein	2.32473	-1.26201	16.0969	6.0182e-05	0.00277537
174811	Histone deacetylase	-0.574325	4.21379	16.0768	6.08258e-05	0.00279814
182331	Uncharacterized protein	-0.801013	3.66431	16.0565	6.14813e-05	0.00282133
173839	COLlagen	2.63843	1.98538	16.0328	6.22554e-05	0.0028434
181293	CLaudin-like in Caenorhabditis	-0.599136	6.48697	16.0284	6.24007e-05	0.0028434
187987	hypothetical protein	1.13057	1.17615	16.0229	6.25793e-05	0.0028434
3565007	Uncharacterized protein	1.68951	-0.843446	16.0191	6.27082e-05	0.0028434
190381	hypothetical protein	0.573934	3.2201	16.0157	6.28197e-05	0.0028434
177420	Galectin	-0.475312	5.71593	16.0139	6.28781e-05	0.0028434
175568	hypothetical protein	0.732701	3.76175	16.0043	6.31978e-05	0.00285094
172498	Presenilin spe-4	0.877401	1.87437	15.9995	6.3358e-05	0.00285126
183776	hypothetical protein	0.964338	1.00759	15.9914	6.36322e-05	0.0028567
266838	Tyrosine-protein kinase	1.24056	0.33317	15.9709	6.4323e-05	0.00288078
183881	F-box A protein	-0.569807	3.52319	15.9515	6.49864e-05	0.00290351
174642	hypothetical protein	1.02062	1.23845	15.9468	6.51476e-05	0.00290374
187270	Uncharacterized protein	-0.669931	5.09588	15.9275	6.58171e-05	0.00292658
189477	hypothetical protein	1.54374	-0.705052	15.8763	6.76197e-05	0.00299731
174119	hypothetical protein	1.16026	0.990468	15.8732	6.77294e-05	0.00299731
189673	hypothetical protein	2.20388	-1.42213	15.8195	6.96806e-05	0.00307635
177272	Major sperm protein 55/57	1.08501	2.53151	15.8148	6.98536e-05	0.0030767
191182	Uncharacterized protein	1.11125	1.29225	15.8026	7.03064e-05	0.00308933
173849	Major sperm protein 19/31/40/45/50/51/53/59/61/65/81/113/142	0.994209	2.27991	15.7785	7.12085e-05	0.00312161
177269	Sperm-Specific family, class Q	0.864777	4.0716	15.7568	7.203e-05	0.00313916
185404	hypothetical protein	1.19318	0.905909	15.7556	7.20724e-05	0.00313916
177829	Tyrosine-protein kinase	1.62277	-0.415589	15.7546	7.21142e-05	0.00313916
175567	Protein containing ALS2cr12 (ALS2CR12) signature	-0.892208	1.33502	15.7356	7.28412e-05	0.00316341
178809	PHAryngeal gland Toxin-related	-1.27713	1.61693	15.729	7.30959e-05	0.00316709
182136	Activated in Blocked Unfolded protein response	2.62349	-0.0467174	15.7036	7.4083e-05	0.00320241
181888	hypothetical protein	0.984277	1.11527	15.6589	7.58561e-05	0.00326994
183344	SCP-Like extracellular protein	-6.09379	-1.65283	15.6517	7.61434e-05	0.00326994
3565615	hypothetical protein	0.67491	3.77721	15.651	7.61717e-05	0.00326994
173979	Acyl CoA DeHydrogenase	1.25937	1.66166	15.6174	7.75376e-05	0.00332093
177992	Uncharacterized protein	1.02002	2.96537	15.6093	7.78715e-05	0.00332758
180101	Major sperm protein	1.10747	1.4828	15.6041	7.8086e-05	0.00332911
179797	C-type LECtin	-0.644657	7.1966	15.5667	7.9644e-05	0.00338778
186035	hypothetical protein	3.14836	0.589782	15.5524	8.02501e-05	0.00340579
182978	Uncharacterized protein	0.878907	0.952743	15.5288	8.12561e-05	0.00344064
179628	Alcohol dehydrogenase 2	-0.928696	2.02141	15.4985	8.25726e-05	0.00348846
180086	Glutamate-gated chloride channel alpha	-0.591281	6.23871	15.4861	8.31155e-05	0.00349858
3565810	hypothetical protein	0.88256	1.42701	15.4844	8.31877e-05	0.00349858
191490	hypothetical protein	0.709713	2.86347	15.445	8.49436e-05	0.00356438
172292	Nematode Specific Peptide family, group D	1.08835	2.52707	15.4368	8.53119e-05	0.00356518
177614	Uncharacterized protein	1.28581	1.28841	15.436	8.53475e-05	0.00356518
173885	#N/A	1.16631	0.635077	15.4318	8.55366e-05	0.00356518
191292	Major sperm protein 19/31/40/45/50/51/53/59/61/65/81/113/142	0.977204	2.27711	15.4043	8.67926e-05	0.00360945
172152	Piwi-like protein	0.74175	5.97999	15.3887	8.75091e-05	0.00363114
182014	hypothetical protein	-1.15615	0.111168	15.3681	8.84682e-05	0.00366278
187696	Uncharacterized protein	3.0981	-0.723634	15.3164	9.09253e-05	0.00375616
178372	Uncharacterized protein	-0.765954	3.61164	15.2877	9.23133e-05	0.00380506
187267	Uncharacterized protein	-1.40288	0.0520829	15.261	9.36282e-05	0.00385074
179348	hypothetical protein	1.28717	0.988972	15.2452	9.44176e-05	0.00387466
172362	hypothetical protein	0.95199	3.39023	15.1668	9.84178e-05	0.00402317
182233	Uncharacterized protein	1.39524	-0.132726	15.1658	9.84684e-05	0.00402317
176854	COLlagen	0.556197	5.18126	15.1566	9.89493e-05	0.00402958
190242	hypothetical protein	0.483305	4.15928	15.1546	9.90579e-05	0.00402958
181943	hypothetical protein	1.23356	0.437052	15.1461	9.95022e-05	0.00403883
178657	C-type LECtin	0.534743	3.80518	15.1305	0.00010033	0.0040636
176665	hypothetical protein	1.09819	0.65014	15.1206	0.000100855	0.00407598
179681	Sperm Specific family, class P	1.1216	1.68704	15.1116	0.00010134	0.00408674
188356	Putative cytochrome P450 CYP13A5	-0.543964	3.62259	15.058	0.000104258	0.00419168
171729	hypothetical protein	1.67414	-0.679396	15.0556	0.000104393	0.00419168
186439	COLlagen	1.40438	-0.330939	15.0318	0.000105715	0.00423566
180090	Major sperm protein	0.79108	3.03117	15.0193	0.000106419	0.00425472
185655	Major sperm protein	1.24957	0.598269	15.0146	0.00010668	0.004256
185664	Uncharacterized protein	1.19026	0.298168	14.9855	0.000108342	0.00431309
181897	hypothetical protein	0.46973	4.41401	14.9735	0.000109032	0.00433129
171780	Protein-tyrosine-phosphatase	0.998277	1.87647	14.9695	0.000109265	0.0043313
172082	Serine/threonine-protein phosphatase PP1-gamma	0.965063	2.54063	14.9347	0.000111296	0.00440244
188198	hypothetical protein	1.3998	0.63238	14.9249	0.000111877	0.00441605
177877	SPerm CHromatin enriched	0.950231	2.70027	14.9174	0.000112321	0.00442422
191437	Bestrophin homolog 25	1.82373	-1.27339	14.9106	0.000112728	0.00443089
185282	C-type LECtin	-5.54773	-1.07777	14.8891	0.000114022	0.00447232
176592	hypothetical protein	1.45425	-0.00132951	14.8713	0.0001151	0.00450511
172359	Protein-tyrosine-phosphatase	1.3088	0.48734	14.8664	0.000115401	0.0045074
179950	hypothetical protein	0.844612	1.51978	14.8578	0.000115929	0.00451856
178689	C-type LECtin	-4.85398	-1.05781	14.8045	0.00011925	0.00463829
174910	hypothetical protein	1.4842	-0.888123	14.7494	0.000122784	0.0047658
178106	Argonaute (plant)-Like Gene	1.16047	2.48723	14.7431	0.000123201	0.00477204
183418	Uncharacterized protein	1.17483	0.959989	14.7164	0.000124952	0.00482982
190237	hypothetical protein	-0.91086	2.16519	14.6949	0.000126385	0.0048751
174915	hypothetical protein	-0.588925	3.28525	14.6796	0.000127417	0.00490475
178688	C-type LECtin	-5.86588	-1.81998	14.6671	0.000128264	0.00491556
184984	hypothetical protein	-1.67007	0.456063	14.6669	0.000128279	0.00491556
176550	hypothetical protein	1.1074	1.66849	14.6638	0.000128489	0.00491556
191964	Sperm-Specific family, class Q	0.946775	2.09589	14.6427	0.000129935	0.0049607
183781	hypothetical protein	1.24655	0.261419	14.6317	0.000130696	0.00497181
191350	Uncharacterized protein	1.18219	1.44815	14.6308	0.00013076	0.00497181
189784	F-box B protein	-0.490557	4.05473	14.6233	0.000131285	0.00498159
173841	Probable glutathione S-transferase 6	-0.55409	4.19004	14.6191	0.000131576	0.00498252
173660	INSulin related	-5.53469	-1.00761	14.6151	0.000131851	0.00498279
178029	COLlagen	0.690549	6.27667	14.6098	0.000132224	0.00498677
3565827	hypothetical protein	1.54929	-0.592265	14.5985	0.000133021	0.00500671
172179	Spermatocyte protein spe-11	1.08026	2.01285	14.585	0.000133979	0.00503259
181772	hypothetical protein	-0.430023	8.87952	14.5575	0.000135943	0.00509608
173505	hypothetical protein	1.44391	0.283128	14.5475	0.000136672	0.00511311
177805	Uncharacterized protein	1.09857	1.0935	14.5357	0.000137529	0.00513488
24104124	hypothetical protein	1.40211	-0.571084	14.5196	0.000138711	0.00516866
178642	hypothetical protein	0.954335	1.31045	14.5152	0.000139035	0.00517037
188181	Prion-like-(Q/N-rich)-domain-bearing protein	0.729454	1.81386	14.5014	0.000140054	0.00519792
173886	hypothetical protein	1.0338	1.48323	14.4805	0.00014162	0.00524558
6418749	hypothetical protein	0.972734	1.85783	14.471	0.000142335	0.00526158
182659	MATH (meprin-associated Traf homology) domain containing	-0.960425	0.420214	14.4387	0.000144794	0.0053419
171824	hypothetical protein	-0.639939	4.86071	14.4323	0.000145288	0.00534219
185779	pseudo	-0.536662	6.47794	14.4312	0.000145375	0.00534219
176294	hypothetical protein	1.12498	0.875404	14.4146	0.000146663	0.00537889
179453	Cuticle collagen 12	0.696273	3.25176	14.3942	0.000148262	0.00542686
183995	hypothetical protein	-0.465697	6.19073	14.3733	0.000149912	0.00547648
172293	SPerm CHromatin enriched	0.913467	2.82705	14.3521	0.000151614	0.00552292
177268	Uncharacterized protein	1.04858	1.34632	14.35	0.000151776	0.00552292
6418731	hypothetical protein	-1.69654	-0.419458	14.3337	0.000153097	0.00555021
176988	COLlagen	0.679532	5.14289	14.3334	0.000153122	0.00555021
181516	Ligand-Gated ion Channel	0.653768	4.09475	14.288	0.000156859	0.00567464
176407	Probable glutamine synthetase	0.896352	1.89997	14.2389	0.000161012	0.00580602
191507	hypothetical protein	0.956088	1.04675	14.2377	0.000161114	0.00580602
177274	Major sperm protein 55/57	0.99084	3.02166	14.2327	0.000161538	0.00581006
176602	COLlagen	0.437564	5.54779	14.2181	0.000162799	0.00583725
13218867	hypothetical protein	2.92539	-1.95609	14.2167	0.00016292	0.00583725
171873	COLlagen	0.650428	4.83016	14.1634	0.000167597	0.00599329
181802	Uncharacterized protein	1.93801	-1.19264	14.1528	0.000168549	0.00601577
182471	Uncharacterized protein	-5.79739	-1.82614	14.1397	0.00016972	0.00604599
186538	hypothetical protein	2.01495	-1.33358	14.1351	0.000170141	0.00604942
177834	Sperm-specific class P protein 10	0.796357	2.33657	14.1238	0.000171167	0.00607433
191390	C-type LECtin	-0.915342	1.62979	14.0622	0.000176863	0.0062535
172166	hypothetical protein	1.14622	1.28643	14.0619	0.000176888	0.0062535
177795	Calcium-transporting ATPase	-0.418823	8.13209	14.0539	0.000177646	0.00626695
180115	Nuclear Hormone Receptor family	-0.845053	1.23406	14.0508	0.000177941	0.00626695
3565125	hypothetical protein	-0.959551	1.4745	14.039	0.000179056	0.00629357
171795	hypothetical protein	1.12225	0.663511	14.0357	0.000179372	0.00629357
7040144	hypothetical protein	-5.2946	-2.1965	14.0153	0.000181334	0.00635043
177014	Uncharacterized protein	1.2311	0.791822	14.0078	0.000182056	0.00636376
177951	PaTched Related family	0.560784	4.81177	14.0021	0.000182604	0.00637098
173825	Major sperm protein 3	1.04401	1.73682	13.9619	0.000186556	0.00649668
187988	hypothetical protein	1.19951	0.288705	13.9567	0.000187073	0.00650253
184715	Uncharacterized protein	0.871455	2.31851	13.9386	0.000188881	0.00655316
187138	COLlagen	0.606291	6.09499	13.9284	0.000189909	0.00657656
180288	hypothetical protein	1.17607	-0.00504545	13.9116	0.000191608	0.00662308
186344	hypothetical protein	0.424526	5.55681	13.8995	0.000192854	0.00665382
191561	hypothetical protein	1.07961	1.15695	13.8681	0.0001961	0.0067533
185255	hypothetical protein	0.905446	1.8632	13.8504	0.000197951	0.00679564
172696	hypothetical protein	1.01122	0.687946	13.8494	0.000198059	0.00679564
190727	hypothetical protein	0.962913	0.646369	13.8392	0.000199135	0.00682002
179701	hypothetical protein	1.71529	-1.10602	13.8331	0.000199786	0.0068235
177270	Bestrophin-6	2.40637	-1.8514	13.8314	0.000199969	0.0068235
186579	Tyrosine-protein kinase	1.15171	0.289082	13.8229	0.000200878	0.00684196
186923	Zinc metalloproteinase nas-17	-5.77368	-1.82819	13.806	0.000202688	0.00688883
174957	hypothetical protein	0.852824	2.62774	13.8032	0.000202993	0.00688883
173607	MS Related Protein	1.08325	0.370143	13.7919	0.00020421	0.00690278
182128	hypothetical protein	2.04569	-1.63266	13.7914	0.000204274	0.00690278
182664	MATH (meprin-associated Traf homology) domain containing	-1.52102	-0.581072	13.7891	0.000204516	0.00690278
176354	hypothetical protein	-4.12517	-0.761733	13.7812	0.000205381	0.00691944
188808	DieneLactone Hydrolase Domain containing protein	-0.603053	4.03436	13.7711	0.000206491	0.00694428
172266	hypothetical protein	-1.41143	0.174906	13.7579	0.000207949	0.00698071
174087	hypothetical protein	1.26671	-0.660968	13.7355	0.000210442	0.00705171
180264	hypothetical protein	0.915947	9.19348	13.7277	0.000211318	0.00706834
13217921	hypothetical protein	-5.67459	-1.97789	13.691	0.000215487	0.00719487
3896728	hypothetical protein	-0.608163	3.84832	13.6871	0.000215927	0.00719578
177275	Major sperm protein 19/31/40/45/50/51/53/59/61/65/81/113/142	1.09847	1.57142	13.6814	0.000216594	0.00719578
173799	C-type LECtin	-3.77384	-1.20214	13.6807	0.000216673	0.00719578
179407	hypothetical protein	0.693849	6.14182	13.6689	0.000218041	0.00720893
259408	INSulin related	-0.655699	2.08242	13.6672	0.00021823	0.00720893
171808	hypothetical protein	-4.07577	-0.985967	13.6665	0.000218309	0.00720893
188207	hypothetical protein	1.12913	0.306961	13.6639	0.000218617	0.00720893
178997	Calreticulin	-0.39977	10.8508	13.6542	0.000219749	0.00721987
174209	hypothetical protein	-0.409069	6.28785	13.6541	0.000219757	0.00721987
183464	hypothetical protein	-0.469939	4.85512	13.6511	0.000220111	0.00721987
190017	Major sperm protein	0.978038	0.773466	13.6195	0.000223843	0.00732939
181113	hypothetical protein	-5.46501	-0.989214	13.6112	0.000224843	0.0073492
179927	hypothetical protein	1.26527	1.02825	13.605	0.00022558	0.00736039
183741	hypothetical protein	-1.66025	-0.56578	13.5891	0.000227506	0.00739874
3564877	F-box A protein	-0.797946	1.92984	13.5887	0.00022755	0.00739874
186456	hypothetical protein	-2.9948	-2.23326	13.5784	0.000228798	0.00742636
353430	Uncharacterized protein	1.27649	-0.231395	13.56	0.000231058	0.0074867
13206883	Uncharacterized protein	-1.60506	-0.343126	13.5559	0.000231563	0.00749001
177889	Uncharacterized protein	0.893417	1.59163	13.5319	0.000234546	0.00756705
178984	hypothetical protein	0.663591	4.655	13.5302	0.000234757	0.00756705
182405	hypothetical protein	-0.677308	4.59736	13.4988	0.000238717	0.00768141
177492	Uncharacterized protein	0.785525	2.8309	13.4921	0.000239572	0.00768364
6418603	hypothetical protein	1.27385	0.666838	13.4918	0.000239611	0.00768364
189378	hypothetical protein	-1.89555	-1.37822	13.478	0.000241373	0.00772683
176282	Protein lin-12	-0.431649	4.834	13.4489	0.000245154	0.00783442
187731	CHItinase-Like	-2.06493	-1.64989	13.422	0.000248687	0.0079337
191613	hypothetical protein	1.04568	0.348929	13.4177	0.000249261	0.00793842
175937	Protein-tyrosine-phosphatase	0.997833	1.2402	13.3883	0.0002532	0.00805011
174644	beta-LACTamase domain containing	0.433702	6.52641	13.3798	0.000254346	0.00807276
182803	Tyrosine-protein kinase	1.32596	-0.0802167	13.3609	0.000256927	0.00814084
24104837	Uncharacterized protein	-5.55377	-2.01289	13.3506	0.00025834	0.00816992
175875	hypothetical protein	0.430529	9.36107	13.3469	0.000258847	0.00816992
259569	#N/A	0.910195	2.2509	13.3447	0.000259161	0.00816992
182639	Putative tyrosine-protein phosphatase C15H7.3	1.18311	0.639122	13.3317	0.000260953	0.00820551
172973	hypothetical protein	1.07883	2.08844	13.3302	0.00026117	0.00820551
177306	Uncharacterized protein	1.48403	-0.943869	13.3136	0.000263486	0.00826432
184744	Zinc metalloproteinase nas-24	-2.5555	-0.717816	13.2746	0.00026903	0.00842401
177929	Spermatocyte protein spe-26	0.864159	1.80678	13.2694	0.000269774	0.00843314
177421	Uncharacterized protein	1.46709	-0.548742	13.2583	0.000271375	0.00846899
185352	hypothetical protein	1.35351	0.246108	13.2412	0.000273869	0.00853252
184269	Putative cuticle collagen 91	0.841184	2.43395	13.1967	0.000280439	0.00872265
3565250	hypothetical protein	0.939389	1.1265	13.1925	0.00028107	0.00872768
185864	hypothetical protein	2.21466	-1.52018	13.1871	0.000281887	0.0087385
189950	C-type LECtin	-1.2637	1.73112	13.1211	0.000291994	0.00902971
177754	Uncharacterized protein	-0.995338	4.31012	13.1176	0.000292541	0.00902971
173477	F-box C protein	-0.446992	4.43877	13.1119	0.00029343	0.00902971
187086	hypothetical protein	0.888122	1.32279	13.1116	0.000293476	0.00902971
176906	Receptor expression-enhancing protein	0.994746	1.18431	13.1101	0.000293704	0.00902971
191769	Transporter	1.13954	-0.125754	13.1054	0.000294442	0.00903746
178885	hypothetical protein	0.619429	6.78949	13.0852	0.000297643	0.00912071
176400	Putative protein tag-76	1.10596	2.5271	13.0702	0.000300039	0.00917901
7040149	hypothetical protein	0.850004	5.36202	13.0649	0.000300874	0.00918949
174444	hypothetical protein	-0.3628	8.66186	13.0224	0.000307784	0.00938506
178204	Uncharacterized protein	1.05167	0.64208	13.0194	0.000308285	0.00938506
187738	CHItinase-Like	-0.527668	5.02604	12.992	0.000312819	0.00950665
178812	PHAryngeal gland Toxin-related	0.645758	3.4355	12.9892	0.0003133	0.00950665
177309	Major sperm protein 19/31/40/45/50/51/53/59/61/65/81/113/142	1.057	2.48456	12.9386	0.000321877	0.00974778
266646	Serine palmitoyltransferase 2	0.457033	4.72553	12.9343	0.000322624	0.00974778
190774	F-box A protein	-1.08105	1.00189	12.9304	0.000323293	0.00974778
183168	hypothetical protein	1.14208	0.97155	12.9301	0.000323339	0.00974778
184885	Uncharacterized protein	-1.30104	-0.403787	12.9044	0.000327816	0.00986678
189610	CUTiclin-Like	0.588182	3.36404	12.9011	0.000328393	0.0098682
175043	hypothetical protein	-0.45119	5.43186	12.8905	0.000330253	0.00990812
179253	hypothetical protein	-1.1787	-0.447137	12.8723	0.00033348	0.00998886
177044	NRAMP-like transporter smf-3	0.602782	4.59412	12.8652	0.000334753	0.0100047
187895	Uncharacterized protein	0.88463	2.08886	12.8633	0.000335084	0.0100047
177341	Uncharacterized protein	0.985081	2.24251	12.8568	0.000336252	0.0100235
188884	Uncharacterized protein	1.34353	0.56364	12.8148	0.000343891	0.0102349
172294	Sperm-specific class P protein 16	1.21618	1.32852	12.8084	0.000345069	0.0102536
190938	hypothetical protein	-5.09476	-1.38949	12.8034	0.000345983	0.0102644
172694	hypothetical protein	0.863403	2.40172	12.7998	0.000346653	0.0102679
4363112	C-type LECtin	-0.969197	0.518076	12.7814	0.000350076	0.0103528
187509	hypothetical protein	1.31855	-0.28633	12.7777	0.000350783	0.0103573
171658	hypothetical protein	1.27816	0.135996	12.7726	0.000351729	0.0103688
184985	hypothetical protein	-2.14625	0.162261	12.7499	0.000356031	0.010479
177759	Uncharacterized protein	0.615629	4.13219	12.7358	0.00035873	0.0105392
178904	Activated in Blocked Unfolded protein response	0.955452	3.70678	12.7296	0.000359911	0.0105392
7040133	hypothetical protein	1.35029	0.576091	12.7284	0.000360153	0.0105392
180785	DumPY: shorter than wild-type	1.30109	1.23235	12.7266	0.000360488	0.0105392
259430	hypothetical protein	-0.494806	4.32013	12.7245	0.000360903	0.0105392
189822	Uncharacterized protein	-0.924083	0.485313	12.7185	0.000362054	0.0105562
172364	hypothetical protein	0.56468	3.32538	12.7106	0.000363587	0.0105844
177298	Uncharacterized protein	0.895093	2.52368	12.7053	0.000364618	0.0105978
179573	Glycosyltransferase family 92 protein F55C10.4	4.52944	-2.53924	12.6931	0.000367	0.0106504
177036	Uncharacterized protein	0.90549	2.3446	12.6628	0.000373008	0.0108079
179822	hypothetical protein	0.661227	6.12579	12.6274	0.000380135	0.0109973
183068	Uncharacterized protein	0.71429	2.61235	12.6056	0.000384597	0.0111092
178637	CaeNaCin (Caenorhabditis bacteriocin)	0.836193	2.33772	12.5735	0.000391251	0.0112839
172316	hypothetical protein	0.943821	0.229429	12.5567	0.00039479	0.0113684
174190	AQuaPorin or aquaglyceroporin related	0.8692	6.15634	12.5501	0.000396192	0.0113911
179974	Sperm Specific family, class P	1.15811	0.050607	12.545	0.000397264	0.0114043
186048	SCP-Like extracellular protein	-4.66056	-1.65571	12.5207	0.000402475	0.0115362
178977	hypothetical protein	1.14797	-0.209079	12.5036	0.000406168	0.0116241
13212644	hypothetical protein	-1.22205	1.1568	12.4923	0.000408629	0.0116766
175510	hypothetical protein	1.44356	-0.727659	12.4583	0.000416144	0.0118608
4927050	Uncharacterized protein	4.36946	-2.62374	12.4574	0.000416346	0.0118608
171973	hypothetical protein	1.20601	-0.0860803	12.4358	0.000421182	0.0119802
181673	hypothetical protein	0.498798	6.43845	12.427	0.000423172	0.0120185
176693	hypothetical protein	1.29414	0.201788	12.4223	0.000424227	0.0120301
183217	hypothetical protein	1.16033	0.284742	12.3793	0.000434124	0.012292
188720	hypothetical protein	3.37495	-2.41343	12.3651	0.00043744	0.0123671
185229	hypothetical protein	1.17281	-0.154657	12.3564	0.000439482	0.012406
188398	Serpentine Receptor, class X	-1.39728	-0.484187	12.339	0.000443597	0.0124911
172358	Acyl CoA DeHydrogenase	2.18496	3.66553	12.338	0.000443837	0.0124911
177809	Uncharacterized protein	0.971407	0.780107	12.3283	0.000446144	0.0125371
174187	Chloride channel protein	-0.431836	5.37436	12.3107	0.000450375	0.0126314
173036	hypothetical protein	1.16677	0.524872	12.3087	0.000450856	0.0126314
190131	hypothetical protein	1.77042	-1.30525	12.2859	0.000456397	0.0127551
179368	Major sperm protein	0.899852	1.66959	12.2849	0.000456641	0.0127551
182982	Uncharacterized protein	1.06924	0.580595	12.2726	0.000459653	0.0128201
180466	hypothetical protein	-0.584491	6.02385	12.2679	0.000460823	0.0128335
180334	INSulin related	-0.916526	1.58157	12.2536	0.000464352	0.0129125
174376	AP-2 Transcription Factor family	-0.561944	3.41498	12.2063	0.000476272	0.0132242
172816	hypothetical protein	-0.40598	5.6722	12.1919	0.000479965	0.0133069
189409	Seven TM Receptor	-1.21264	0.624356	12.1878	0.000481032	0.0133167
178811	PHAryngeal gland Toxin-related	0.511828	5.28911	12.1756	0.00048418	0.0133763
184403	hypothetical protein	1.4506	-1.08999	12.1739	0.000484623	0.0133763
176117	Putative cuticle collagen 90	1.45425	0.796304	12.1619	0.000487751	0.0134427
179078	hypothetical protein	1.15106	0.678608	12.1529	0.000490106	0.0134621
186073	hypothetical protein	-0.726128	5.04939	12.152	0.000490363	0.0134621
177489	Serine/threonine-protein phosphatase	1.24437	0.15343	12.1507	0.000490702	0.0134621
177263	Uncharacterized protein	1.40285	0.764726	12.1482	0.000491343	0.0134621
187772	hypothetical protein	0.88197	1.53793	12.1212	0.000498511	0.0136384
3564946	Insulin/EGF-Receptor L Domain protein	1.73372	-0.908687	12.1154	0.000500071	0.013661
179954	hypothetical protein	0.941161	0.441157	12.1051	0.000502838	0.0137165
189310	hypothetical protein	1.10612	-0.0942097	12.0679	0.000512987	0.0139729
189455	hypothetical protein	-0.550342	5.66662	12.0644	0.00051393	0.0139782
178459	bZIP transcription factor family	-0.455903	3.97892	12.0591	0.000515415	0.0139981
173943	hypothetical protein	0.66358	3.94794	12.0484	0.000518359	0.0140576
3565254	Uncharacterized protein	-0.43779	5.12153	12.0033	0.000531065	0.0143812
172964	hypothetical protein	1.05142	0.251025	11.9744	0.00053937	0.0145849
187164	Uncharacterized protein	1.18514	0.573502	11.9659	0.000541818	0.0146299
180878	hypothetical protein	0.572692	3.34132	11.9613	0.00054318	0.0146454
190372	Uncharacterized protein	1.09042	0.474714	11.9524	0.000545759	0.0146937
183094	Uncharacterized protein	1.02042	0.402929	11.9412	0.00054905	0.014761
182377	Uncharacterized protein	1.22062	0.0345595	11.9368	0.000550349	0.0147746
3896749	hypothetical protein	1.60542	-0.974485	11.9335	0.000551341	0.0147799
188722	Major sperm protein	0.994618	1.11511	11.9269	0.000553305	0.0147954
183128	Uncharacterized protein	-0.728407	3.25113	11.9262	0.000553508	0.0147954
182028	SCP-Like extracellular protein	1.47832	-1.32434	11.9077	0.000559021	0.0149214
186998	Insulin/EGF-Receptor L Domain protein	-0.751075	1.35451	11.8963	0.000562466	0.0149919
185395	Uncharacterized protein	1.20654	0.326882	11.8643	0.00057221	0.0152298
183677	hypothetical protein	-2.65962	-0.623862	11.8562	0.000574707	0.0152724
179926	Equilibrative Nucleoside Transporter	0.968279	0.815685	11.8538	0.000575449	0.0152724
187316	Fasting Induced Lipase	-0.963582	4.3483	11.8502	0.00057654	0.0152795
182018	CUTiclin-Like	0.629354	2.81287	11.8189	0.000586325	0.0155168
190893	Uncharacterized protein	1.34992	-0.674263	11.8078	0.000589819	0.0155871
182625	hypothetical protein	0.9929	0.181841	11.8006	0.000592132	0.0156261
185537	hypothetical protein	1.42923	-0.54505	11.7852	0.000597037	0.0157332
179658	hypothetical protein	-0.44402	5.3789	11.7814	0.000598262	0.0157433
177278	Regulator of Microtubule Dynamics	1.56862	-1.00506	11.7644	0.000603732	0.0158648
173833	hypothetical protein	1.00569	1.24716	11.7528	0.00060753	0.0159421
187723	COLlagen	0.626875	2.46596	11.7455	0.000609919	0.0159823
172202	hypothetical protein	0.99085	1.21605	11.7425	0.000610884	0.0159851
13211194	Uncharacterized protein	2.71951	-2.34012	11.7375	0.000612539	0.0160059
177950	Na+/K+ ATPase, Beta subunit	0.982989	0.923533	11.7238	0.000617042	0.016101
175990	hypothetical protein	1.06066	0.450703	11.7032	0.000623933	0.016258
178249	Uncharacterized protein	-0.743212	3.59524	11.6939	0.000627043	0.0163163
3565063	hypothetical protein	1.51359	-1.23822	11.6844	0.000630248	0.0163768
189843	COLlagen	0.591763	3.14648	11.6676	0.000635977	0.0165026
181808	hypothetical protein	1.32125	0.0367071	11.644	0.000644101	0.0166902
182977	Uncharacterized protein	-1.63031	-0.0277649	11.629	0.00064933	0.0168023
189547	C-type LECtin	-5.07078	-2.30296	11.6056	0.000657541	0.0169912
181017	STOmatin	-0.376228	6.82278	11.6021	0.000658787	0.0169998
7040175	hypothetical protein	-0.451383	6.2307	11.5941	0.000661622	0.0170301
191450	Uncharacterized protein	-0.602438	3.78652	11.5936	0.000661791	0.0170301
172845	Zinc finger putative Transcription Factor family	-0.405203	6.11031	11.5896	0.000663203	0.0170429
176316	Cell death-related nuclease 6	-0.44206	5.20867	11.583	0.000665583	0.0170805
182232	Uncharacterized protein	1.21469	0.542619	11.5775	0.000667547	0.0171074
173365	Cell death specification protein 2	-0.405316	5.75354	11.5655	0.000671875	0.0171391
189342	C-type LECtin	-5.05266	-2.30403	11.5652	0.000671959	0.0171391
3565838	hypothetical protein	0.744948	1.40766	11.5642	0.000672322	0.0171391
181619	hypothetical protein	-0.644697	4.50191	11.5639	0.000672464	0.0171391
179924	hypothetical protein	0.800869	2.58079	11.5574	0.000674814	0.0171755
178206	Uncharacterized protein	0.929484	0.713802	11.5485	0.000678046	0.0172342
6418817	hypothetical protein	1.24522	-0.521389	11.5396	0.000681289	0.017293
184447	O-ACyltransferase homolog	1.23756	-0.0944905	11.5339	0.000683398	0.017323
183409	hypothetical protein	-1.86164	-1.21442	11.4934	0.000698453	0.0176805
175482	hypothetical protein	1.09733	0.902998	11.4863	0.000701127	0.0177241
173821	hypothetical protein	-0.730261	2.79699	11.4712	0.000706829	0.0178211
3565832	hypothetical protein	0.470529	4.78047	11.4711	0.000706874	0.0178211
179334	hypothetical protein	0.963352	0.441661	11.4649	0.000709235	0.0178564
177767	Aminoacylase	0.666502	2.75183	11.4597	0.000711231	0.0178825
190308	EGR (Early Growth factor Response factor) Homolog	0.611203	2.29196	11.4497	0.000715069	0.0179548
186602	Palmitoyltransferase	1.05007	-0.267455	11.4245	0.000724803	0.0181747
177814	Major sperm protein 78	0.893367	2.03501	11.4212	0.000726107	0.0181829
172415	Sperm Meiosis PDZ domain containing proteins	0.890205	1.99435	11.4076	0.00073146	0.0182714
182351	hypothetical protein	-0.535387	3.79556	11.4072	0.000731602	0.0182714
183505	hypothetical protein	1.21599	0.38196	11.4015	0.000733864	0.0183034
182742	hypothetical protein	0.979019	0.433054	11.392	0.00073761	0.0183722
184935	Asparagine synthetase	0.634864	3.21804	11.3694	0.000746634	0.0185722
190377	Uncharacterized protein	1.45422	-0.434149	11.3659	0.000748068	0.018583
179245	hypothetical protein	0.959521	1.83261	11.3494	0.000754732	0.0187236
182017	hypothetical protein	1.04955	-0.171908	11.3442	0.000756849	0.0187511
178406	Uncharacterized protein	0.723964	0.975836	11.3243	0.000764977	0.0188866
191734	Non-specific lipid-transfer protein-like 1	0.359421	6.97857	11.3238	0.000765206	0.0188866
174933	Serine/threonine-protein phosphatase	1.10584	0.586511	11.3234	0.000765358	0.0188866
3565544	hypothetical protein	2.74809	-1.86615	11.2982	0.000775809	0.0191192
3565542	Major sperm protein	1.11149	-0.288393	11.2876	0.000780277	0.0192039
185996	hypothetical protein	1.89768	-1.12928	11.2837	0.000781911	0.0192187
182674	hypothetical protein	-5.14389	-2.20625	11.281	0.000783034	0.0192209
13223017	hypothetical protein	-2.04013	-2.07173	11.2683	0.000788428	0.0193279
177918	fatty Acid CoA Synthetase family	1.02895	1.41011	11.2598	0.000792053	0.0193658
175067	hypothetical protein	1.00871	0.768748	11.2579	0.000792862	0.0193658
3896753	FIP (Fungus-Induced Protein) Related	-3.95441	-2.76812	11.2573	0.000793091	0.0193658
259760	Uncharacterized protein	-0.80643	1.65472	11.247	0.000797512	0.0194482
180333	hypothetical protein	0.773696	1.2803	11.2431	0.000799217	0.0194643
177328	Uncharacterized protein	1.4064	-0.741405	11.237	0.000801828	0.0195024
188664	F-box A protein	-0.926689	0.230581	11.208	0.000814475	0.0197842
3565956	hypothetical protein	-0.523363	2.83452	11.1843	0.000824936	0.0200122
172683	Glycogen Synthase Kinase Alpha subunit	0.973015	1.85196	11.1576	0.00083687	0.0202524
175856	hypothetical protein	1.04595	0.530962	11.1573	0.000837011	0.0202524
3564956	Serpentine Receptor, class Z	-0.964221	1.53963	11.1538	0.000838616	0.0202649
186797	Palmitoyltransferase	1.7009	-0.911294	11.1409	0.000844464	0.0203798
178115	Uncharacterized protein	1.1973	0.79265	11.1378	0.000845878	0.0203875
181235	hypothetical protein	-0.545848	2.92656	11.1192	0.000854392	0.0205622
177081	Vitellogenin Regulating Protein	-0.435199	6.67322	11.1171	0.000855332	0.0205622
182680	hypothetical protein	1.06043	0.494631	11.1143	0.000856669	0.0205678
172300	hypothetical protein	-0.409825	8.27094	11.1098	0.00085872	0.0205898
177347	Uncharacterized protein	0.898886	0.460105	11.1075	0.000859796	0.0205898
181543	JuMonJi (transcription factor) Domain protein	-0.465777	4.1993	11.0993	0.000863598	0.0206521
189218	hypothetical protein	-0.520709	3.53573	11.0971	0.000864613	0.0206521
180319	hypothetical protein	-0.531099	5.38237	11.0923	0.000866861	0.0206793
178253	SCP-Like extracellular protein	-0.873485	5.04568	11.0829	0.000871283	0.0207582
174568	FMRF-Like Peptide	-0.531625	4.31675	11.0772	0.000873972	0.0207956
178230	Major sperm protein	0.940967	1.39116	11.0737	0.000875609	0.0207992
175135	hypothetical protein	1.24634	-0.350264	11.0721	0.000876354	0.0207992
183774	Neuropeptide-Like Protein	1.838	-0.798943	11.0694	0.000877642	0.0208032
173658	C-type LECtin	1.0222	1.57485	11.0652	0.000879619	0.0208221
3565540	hypothetical protein	1.33077	-0.272	11.0621	0.000881108	0.0208221
191327	Protein-tyrosine-phosphatase	1.33303	-0.00891213	11.0607	0.000881792	0.0208221
3565065	Uncharacterized protein	1.24878	0.338734	11.0577	0.000883214	0.0208293
172400	Acyl CoA DeHydrogenase	1.15813	0.155849	11.0532	0.000885324	0.0208398
188277	Uncharacterized protein	0.936769	2.57523	11.052	0.000885896	0.0208398
185428	sperm COMPetition	0.979235	0.532662	11.0478	0.000887925	0.0208612
173467	F-box C protein	-0.425487	6.52693	11.0365	0.000893372	0.0209627
172710	hypothetical protein	0.874556	1.0021	11.0292	0.000896892	0.0210189
171660	hypothetical protein	1.0393	0.373761	11.021	0.00090086	0.0210833
24104858	Uncharacterized protein	1.25048	-0.887776	11.0188	0.000901904	0.0210833
176963	Uncharacterized protein	-0.643454	2.73001	11.0068	0.000907759	0.0211936
181836	hypothetical protein	1.36811	-0.332069	10.9952	0.000913464	0.0213001
190738	CaLPain family	0.785919	0.999198	10.9919	0.000915103	0.0213116
174008	hypothetical protein	0.567223	4.86636	10.9829	0.00091956	0.0213848
181272	TransThyretin-Related family domain	0.577479	4.57269	10.9809	0.000920542	0.0213848
174709	Serine Rich Adhesion Protein-like	-0.519009	8.25508	10.9675	0.000927223	0.0215132
191464	hypothetical protein	1.10684	0.219221	10.9643	0.000928827	0.0215236
172989	hypothetical protein	-0.435708	7.87833	10.9617	0.00093015	0.0215275
186146	hypothetical protein	-0.51768	4.2618	10.9511	0.000935476	0.0216239
3565474	FIP (Fungus-Induced Protein) Related	0.552978	2.99783	10.9464	0.00093788	0.0216477
3565195	Uncharacterized protein	2.02517	-1.89582	10.9423	0.000939929	0.0216477
185391	hypothetical protein	0.75958	2.25012	10.9422	0.000939991	0.0216477
179977	hypothetical protein	1.65257	-1.28797	10.932	0.000945157	0.0217398
178307	Tyrosine-protein kinase	1.25498	-0.32777	10.9297	0.000946336	0.0217401
191554	hypothetical protein	-2.6896	-1.18892	10.9089	0.00095703	0.0219587
187933	hypothetical protein	0.823067	1.02033	10.8931	0.00096522	0.0221193
6418576	hypothetical protein	-0.503865	3.20257	10.878	0.000973141	0.0222735
190213	hypothetical protein	1.13734	0.0826133	10.8665	0.000979194	0.0223845
191200	hypothetical protein	1.05775	-0.00952707	10.8526	0.000986598	0.0225261
183243	hypothetical protein	-0.413898	5.63901	10.8472	0.000989465	0.0225639
173549	hypothetical protein	-0.404271	5.48338	10.8424	0.00099202	0.0225729
3565377	hypothetical protein	-5.27386	-2.11225	10.8419	0.000992283	0.0225729
180249	hypothetical protein	1.56617	-0.736199	10.836	0.000995458	0.0226175
6418646	hypothetical protein	-3.73074	-1.7729	10.8256	0.00100108	0.0227176
186682	Nematode Specific Peptide family, group B	1.10686	-0.475317	10.818	0.00100518	0.0227829
173188	hypothetical protein	-0.401994	6.19952	10.7947	0.00101791	0.0230434
174626	Putative serine/threonine-protein phosphatase C06A1.3	0.842414	0.980968	10.79	0.0010205	0.0230734
180092	hypothetical protein	0.818191	3.70563	10.785	0.00102328	0.0230734
177739	Uncharacterized protein	1.36463	-0.732342	10.7832	0.00102426	0.0230734
6418744	hypothetical protein	1.48226	-0.606079	10.7821	0.00102485	0.0230734
182073	Uncharacterized protein	1.3029	-0.636832	10.7801	0.00102599	0.0230734
13191692	hypothetical protein	-2.27146	-2.13293	10.7768	0.00102782	0.0230734
181854	C-type LECtin	0.444257	5.49402	10.7759	0.00102831	0.0230734
186080	hypothetical protein	-1.22272	0.195569	10.7743	0.00102917	0.0230734
179621	intestinal acid PHOsphatase	-0.683532	2.45144	10.7722	0.00103038	0.0230734
3896798	Uncharacterized protein	-0.558344	2.72001	10.7632	0.0010354	0.0231157
13217918	hypothetical protein	-4.12161	-1.20359	10.7618	0.00103618	0.0231157
185199	Uncharacterized protein	1.08405	0.105059	10.7614	0.00103641	0.0231157
181530	C. Elegans Homeobox	-0.381122	5.21594	10.7599	0.00103724	0.0231157
185758	hypothetical protein	-0.819935	0.681624	10.7517	0.00104185	0.0231908
175687	hypothetical protein	1.19024	0.296976	10.747	0.00104449	0.0232185
188843	hypothetical protein	-0.428246	4.85617	10.7429	0.00104678	0.0232185
6418627	hypothetical protein	-1.04006	0.797007	10.7428	0.00104683	0.0232185
172707	Fungus-Induced Protein	0.678881	1.9656	10.7225	0.0010584	0.023447
174561	Serine/threonine-protein phosphatase	0.860621	2.10898	10.7171	0.00106153	0.0234885
179561	C-type LECtin	-0.379191	4.99543	10.7122	0.00106432	0.0235224
185377	F-box A protein	-0.680465	1.06582	10.7088	0.00106627	0.0235374
177488	Uncharacterized protein	1.01306	0.885355	10.6983	0.00107236	0.0236439
186128	hypothetical protein	1.02492	1.09874	10.6956	0.0010739	0.02365
191201	TRYpsin-like protease	1.33222	-0.695096	10.692	0.001076	0.0236681
175446	hypothetical protein	0.83114	1.42419	10.6822	0.00108169	0.0237654
3564768	hypothetical protein	0.956811	0.54576	10.6684	0.00108982	0.0239156
185551	hypothetical protein	0.959047	0.395899	10.6627	0.00109318	0.0239584
186337	Uncharacterized protein	-0.967051	1.39397	10.6607	0.00109434	0.0239584
177176	dietary restriction down regulated	-1.34893	-0.648143	10.6545	0.00109806	0.0240116
187019	hypothetical protein	0.876646	1.42189	10.6471	0.00110246	0.0240778
4363121	hypothetical protein	0.647635	3.61312	10.645	0.00110367	0.0240778
186499	hypothetical protein	-0.398161	7.10081	10.633	0.00111088	0.0242067
3565537	hypothetical protein	-2.0362	0.00868559	10.6156	0.00112137	0.0244011
24105065	Uncharacterized protein	0.798407	2.08543	10.6139	0.00112242	0.0244011
178456	Uncharacterized protein	-0.425316	4.77386	10.6089	0.00112543	0.0244381
178778	60S ribosomal protein L11-1	0.607597	8.71797	10.5836	0.00114096	0.0247464
179335	ATP-dependent 6-phosphofructokinase 2	0.948009	0.813242	10.5722	0.00114798	0.0248698
190544	Uncharacterized protein	1.47011	-1.25625	10.5698	0.00114953	0.0248745
176076	FiBrilliN homolog	-0.409987	6.98623	10.5493	0.00116232	0.0251064
178010	Uncharacterized protein	-4.5378	-1.79736	10.5483	0.00116295	0.0251064
185379	Protein-tyrosine-phosphatase	1.07861	0.299701	10.536	0.00117072	0.0252159
177087	Chondroitin proteoglycan 9	0.570885	3.25361	10.5346	0.00117162	0.0252159
180729	Putative ammonium transporter 1	0.48094	4.31303	10.5339	0.00117208	0.0252159
182917	Uncharacterized protein	1.31532	-0.849924	10.5309	0.00117397	0.0252261
178032	Uncharacterized protein	1.15896	0.227612	10.5288	0.00117526	0.0252261
183728	hypothetical protein	0.957292	0.770188	10.5194	0.00118126	0.0253257
172809	hypothetical protein	1.03482	0.663769	10.5083	0.00118842	0.0254459
183410	SKN-1 Dependent Zygotic transcript	-1.84576	-1.39119	10.5064	0.0011896	0.0254459
181544	Protein gfi-3	-0.382859	5.10571	10.4992	0.00119427	0.0255103
182231	TransThyretin-Related family domain	-0.556953	3.49689	10.4975	0.00119535	0.0255103
3565413	COLlagen	-0.884767	7.44365	10.4843	0.00120396	0.0256648
189276	hypothetical protein	0.602072	2.12097	10.4813	0.00120588	0.0256763
174242	Na(+)/H(+) exchanger protein 2	0.336323	6.765	10.4684	0.00121434	0.0258218
185248	Activated in Blocked Unfolded protein response	1.07388	1.35938	10.4667	0.00121549	0.0258218
183570	hypothetical protein	1.04932	0.447761	10.4609	0.00121929	0.0258731
174341	E2F-like (mammalian transcription factor)	-0.366482	6.10464	10.4463	0.00122895	0.0260477
3564899	Uncharacterized protein	1.05064	1.34693	10.4443	0.00123031	0.0260477
172458	Helix Loop Helix	-0.361706	6.12358	10.4374	0.00123487	0.0260967
183124	hypothetical protein	0.991814	1.08881	10.4356	0.0012361	0.0260967
183961	MARCH (Membrane-Associated Ring finger (C3HC4)) homolog	1.00964	0.274979	10.4345	0.00123683	0.0260967
184310	C-type LECtin	0.884012	1.30333	10.4288	0.00124065	0.0261478
187683	LIPaSe related	0.577515	1.95571	10.4186	0.00124753	0.0262302
176538	hypothetical protein	1.00713	0.871875	10.4168	0.00124877	0.0262302
178205	Uncharacterized protein	-0.419883	5.48181	10.4167	0.00124879	0.0262302
173681	BTB and MATH domain containing	-0.393087	4.68962	10.4146	0.00125022	0.0262307
189770	hypothetical protein	-0.430692	4.01335	10.3889	0.00126772	0.0265554
184987	C-type LECtin	-4.23063	-1.50136	10.3871	0.00126896	0.0265554
190711	Prion-like-(Q/N-rich)-domain-bearing protein	-0.461681	5.55831	10.3857	0.00126997	0.0265554
173893	hypothetical protein	1.76199	-1.67478	10.3683	0.00128198	0.0267764
3565160	Putative zinc finger protein ZK686.5	1.06899	-0.0756615	10.3585	0.00128878	0.0268883
175051	hypothetical protein	1.77912	-0.678085	10.3517	0.00129355	0.0269576
6418800	hypothetical protein	-1.05708	0.182234	10.3368	0.00130402	0.0271455
183929	hypothetical protein	1.086	0.337729	10.32	0.00131596	0.0273372
184197	hypothetical protein	1.48435	-1.23605	10.3197	0.00131617	0.0273372
178454	CCCH-type zinc finger putative transcription factor	-0.746324	1.13546	10.3175	0.00131775	0.0273397
177154	C-type LECtin	0.828654	1.68865	10.2996	0.00133058	0.0275752
172559	hypothetical protein	1.07076	0.116109	10.2876	0.00133927	0.0277244
178228	Uncharacterized protein	0.886708	0.672898	10.2725	0.00135025	0.0279199
181801	Prion-like-(Q/N-rich)-domain-bearing protein	2.97291	-1.33301	10.2705	0.00135171	0.0279199
182072	pseudo	0.755544	6.38914	10.2657	0.00135527	0.0279624
179645	hypothetical protein	0.401427	11.1945	10.2537	0.00136411	0.0281136
186329	Uncharacterized protein	-0.520329	4.63504	10.2474	0.00136874	0.0281779
186328	Uncharacterized protein	-0.625976	4.96536	10.2444	0.00137101	0.0281934
13222680	hypothetical protein	0.988838	-0.0269572	10.2359	0.00137737	0.0282662
181356	COLlagen	0.656668	1.81428	10.2356	0.00137758	0.0282662
186201	hypothetical protein	-0.484328	3.44945	10.2308	0.00138113	0.0282968
181231	Steroid hormone receptor family member cnr14	-0.395654	6.06078	10.2295	0.00138211	0.0282968
173883	hypothetical protein	0.9558	0.344096	10.2172	0.00139135	0.0284546
184236	hypothetical protein	-3.03395	-1.42457	10.1877	0.00141378	0.0288818
177219	Uncharacterized protein	0.801997	3.57688	10.1776	0.00142156	0.0290088
184312	Prion-like-(Q/N-rich)-domain-bearing protein	0.627049	2.51559	10.174	0.00142436	0.0290341
183803	hypothetical protein	1.95848	-1.03704	10.1649	0.00143141	0.0291235
186777	Purple acid phosphatase	-1.67956	-1.56026	10.1643	0.00143187	0.0291235
180569	ImmunoGlobulin-like Cell adhesion Molecule family	-0.365015	7.93532	10.1516	0.00144179	0.0292934
172606	hypothetical protein	1.14336	-0.417265	10.1463	0.00144592	0.0293212
3565444	QWGYGGY-amide	0.560934	2.69264	10.1458	0.00144631	0.0293212
179478	hypothetical protein	-0.33512	5.83234	10.1378	0.00145259	0.0294165
184562	Nuclear Hormone Receptor family	0.644035	3.09096	10.1258	0.0014621	0.029577
190603	hypothetical protein	0.962857	0.0956841	10.1154	0.00147039	0.0297124
13212503	hypothetical protein	1.44185	-0.868215	10.1046	0.00147896	0.0298533
181745	Receptor-type guanylate cyclase gcy-11	-0.465769	3.84095	10.0694	0.00150751	0.0303965
175411	Protein-tyrosine-phosphatase	1.20766	-0.502856	10.0569	0.00151776	0.0305407
184146	hypothetical protein	-0.922572	0.717816	10.0567	0.00151794	0.0305407
173104	hypothetical protein	-0.474617	3.41617	10.0517	0.0015221	0.0305717
184075	Insulin/EGF-Receptor L Domain protein	1.36257	-0.431527	10.0509	0.00152276	0.0305717
178105	Protein dumpy-20	1.34035	-0.622746	10.0481	0.00152503	0.0305843
189085	SULfate Permease family	1.06329	-0.361838	10.0442	0.00152831	0.0306172
173446	LIPaSe related	0.562581	2.96974	10.0401	0.00153166	0.0306513
185291	hypothetical protein	0.716892	1.14561	10.034	0.00153675	0.0307202
3565826	hypothetical protein	-4.60641	-2.49885	10.0253	0.00154401	0.0308323
179861	hypothetical protein	-0.413633	5.95757	10.0168	0.00155117	0.030942
179913	fatty Acid CoA Synthetase family	0.858493	1.66594	10.0126	0.00155475	0.0309803
177013	Uncharacterized protein	0.941782	1.33068	10.0049	0.0015612	0.0310756
189789	Catechol-O-MethylTransferase family	0.779718	3.40084	9.99948	0.00156584	0.0311347
190300	hypothetical protein	1.05496	-0.0810144	9.97193	0.00158944	0.0315703
177444	Uncharacterized protein	0.757905	2.17028	9.96275	0.00159739	0.0316944
187045	Zinc metalloproteinase nas-3	0.878796	0.354814	9.9602	0.00159961	0.0317046
182024	hypothetical protein	1.66106	-1.28488	9.92563	0.00162993	0.0322712
192068	TetraSPanin family	1.877	-1.38819	9.92259	0.00163263	0.0322903
191195	hypothetical protein	1.06199	-0.235822	9.91484	0.00163952	0.0323812
178294	Prion-like-(Q/N-rich)-domain-bearing protein	0.58613	5.29669	9.91271	0.00164142	0.0323812
177311	Major sperm protein 19/31/40/45/50/51/53/59/61/65/81/113/142	0.896079	1.28802	9.91156	0.00164243	0.0323812
182481	hypothetical protein	1.22461	-0.163966	9.90029	0.00165252	0.0325456
186411	hypothetical protein	1.55753	-1.34331	9.89384	0.00165833	0.0326256
179515	hypothetical protein	-0.382598	5.41251	9.88274	0.00166836	0.0327883
190916	hypothetical protein	0.93246	1.8227	9.88048	0.00167042	0.032794
183208	Uncharacterized protein	0.66365	2.59205	9.85709	0.00169178	0.0331785
4363094	hypothetical protein	1.25788	-0.709684	9.83979	0.00170777	0.0334482
188167	O-ACyltransferase homolog	2.40767	-1.84303	9.83833	0.00170912	0.0334482
3565514	Palmitoyltransferase spe-10	1.00186	-0.29845	9.83015	0.00171674	0.0335305
178239	Uncharacterized protein	-0.632996	5.69053	9.82995	0.00171693	0.0335305
191244	hypothetical protein	-1.32953	-1.06975	9.8173	0.00172878	0.0336991
187601	Putative zinc finger protein R05D3.3	0.521894	2.47469	9.81687	0.00172918	0.0336991
186426	Elongation of very long chain fatty acids protein	1.30387	-0.384568	9.81437	0.00173154	0.0337098
172544	Neuropeptide-Like Protein	-0.398855	5.37861	9.80999	0.00173566	0.0337549
177832	Uncharacterized protein	1.3165	-0.595157	9.80236	0.00174288	0.0338327
185421	Uncharacterized protein	1.44422	-1.27323	9.80192	0.0017433	0.0338327
182795	B3GNT1, Beta-1,3-N-acetylGucosamiNylTransferase 1, homolog	1.93053	-1.67836	9.79291	0.00175186	0.0339634
176797	hypothetical protein	0.370185	7.16284	9.78208	0.00176221	0.0341287
190348	Serpentine receptor class epsilon-27	-1.383	-1.41517	9.77873	0.00176542	0.0341553
173711	hypothetical protein	-0.470428	3.42427	9.77362	0.00177034	0.0342149
187546	Aminopeptidase	1.2076	-0.0590256	9.75609	0.00178729	0.0345068
177465	Uncharacterized protein	1.26242	-0.398604	9.7533	0.00179001	0.0345235
186279	pseudo	0.636205	4.68446	9.74071	0.00180231	0.0347248
188639	hypothetical protein	1.68215	-1.42369	9.73822	0.00180476	0.034736
173065	DNaJ domain (prokaryotic heat shock protein)	-0.346919	6.32462	9.72542	0.00181736	0.0349106
173185	hypothetical protein	1.05019	0.624986	9.72521	0.00181758	0.0349106
186982	hypothetical protein	1.14272	-0.44984	9.71186	0.00183083	0.0351018
176582	Serine/threonine-protein kinase spe-6	0.66358	1.52322	9.71138	0.0018313	0.0351018
177230	COLlagen	0.562181	3.27556	9.70084	0.00184184	0.0352675
187423	hypothetical protein	2.39208	-2.23878	9.69577	0.00184693	0.0353027
178520	Uncharacterized protein	-1.88288	0.0836028	9.69524	0.00184746	0.0353027
178810	hypothetical protein	-0.898669	5.99805	9.68583	0.00185695	0.0354475
189355	Uncharacterized protein	-0.458	4.79217	9.68341	0.00185939	0.0354579
174512	Nuclear hormone receptor family member nhr-19	-0.385096	5.65268	9.6619	0.00188129	0.0358168
3565494	hypothetical protein	0.628647	2.50789	9.66115	0.00188206	0.0358168
191152	hypothetical protein	-0.463608	5.8762	9.65409	0.0018893	0.0359179
182626	hypothetical protein	0.628591	1.72896	9.63625	0.00190774	0.0362315
191362	Uncharacterized protein	1.44808	-1.07599	9.62893	0.00191536	0.0363191
190507	Uncharacterized protein	1.64575	-0.773899	9.62808	0.00191625	0.0363191
173705	C-type LECtin	-4.44935	-2.58181	9.62597	0.00191845	0.0363238
183971	P-GlycoProtein related	-0.424677	4.92238	9.62049	0.00192418	0.0363953
176832	T Cell Lineage defect	-0.359917	4.84007	9.61839	0.00192639	0.0364001
24104735	hypothetical protein	0.459452	3.40131	9.61495	0.00193	0.0364313
259490	hypothetical protein	-0.38003	5.955	9.60987	0.00193534	0.0364953
173851	hypothetical protein	0.949198	-0.168777	9.60456	0.00194095	0.036564
181545	Histone H1.1	-0.358514	9.33357	9.55046	0.00199899	0.0376193
177922	Uncharacterized protein	0.682816	1.64977	9.54601	0.00200384	0.0376727
175880	Putative serine/threonine-protein phosphatase C23G10.1	1.2542	-0.258845	9.53676	0.00201397	0.0378249
175640	Nematode Specific Peptide family, group D	0.909276	0.934109	9.53362	0.00201742	0.0378515
182651	hypothetical protein	1.10984	0.259554	9.4999	0.00205483	0.0385145
172436	hypothetical protein	0.56748	2.62266	9.48008	0.00207714	0.0388937
178826	Neuropeptide-Like Protein	-0.435547	5.49101	9.46015	0.00209984	0.0392578
184066	Uncharacterized protein	-1.68581	-1.18168	9.45747	0.00210291	0.0392578
177732	Uncharacterized protein	0.703885	1.45501	9.45699	0.00210346	0.0392578
172932	Neuropeptide-Like Protein	0.98506	0.00921151	9.45563	0.00210502	0.0392578
3565016	hypothetical protein	4.3503	-2.58622	9.45286	0.0021082	0.0392779
186263	hypothetical protein	-0.709195	1.28269	9.44914	0.00211248	0.0393184
175202	C.Elegans Chromodomain protein	-0.406732	5.44419	9.44182	0.00212093	0.0394363
188663	hypothetical protein	1.33468	-0.654969	9.43501	0.00212882	0.0395433
172496	hypothetical protein	-0.518537	5.87204	9.433	0.00213115	0.0395474
182336	hypothetical protein	0.537985	2.79884	9.42088	0.00214528	0.0397699
190218	Major sperm protein	0.897055	0.615648	9.40487	0.0021641	0.0400789
188157	MiRP K channel accessory Subunit	1.42414	-0.547163	9.39474	0.00217608	0.0402608
173089	CaLPain family	0.832843	0.469386	9.36123	0.00221624	0.040963
179349	hypothetical protein	0.973745	1.00323	9.34362	0.00223763	0.041305
182866	hypothetical protein	-0.417376	3.41931	9.34102	0.00224081	0.041305
182402	F-box A protein	-0.556086	2.85304	9.34054	0.00224139	0.041305
181215	Cystathionine Beta-Synthase	-0.330391	6.51112	9.33575	0.00224726	0.0413722
172659	Sperm vesicle fusion protein fer-1	0.778673	1.3526	9.33165	0.0022523	0.0413741
3896783	DAF-16/FOXO Controlled, germline Tumor affecting	1.00764	-0.435772	9.32902	0.00225553	0.0413741
3564803	Uncharacterized protein	1.09501	0.0657795	9.32802	0.00225676	0.0413741
176412	hypothetical protein	0.614796	2.11593	9.32683	0.00225823	0.0413741
186791	hypothetical protein	0.98024	0.0267968	9.32664	0.00225846	0.0413741
187286	hypothetical protein	1.56617	-1.50392	9.32375	0.00226203	0.0413987
175891	Kelch repeat and BTB domain-containing protein F47D12.7	0.900434	1.53737	9.31718	0.00227015	0.0415065
176720	hypothetical protein	0.920379	1.48727	9.31093	0.00227791	0.0416075
176965	Uncharacterized protein	-0.487316	6.44255	9.29679	0.00229556	0.041889
178645	Cell Division Cycle related	-0.387823	6.90797	9.29349	0.0022997	0.0419234
180266	hypothetical protein	1.26853	-0.325673	9.27648	0.00232115	0.042273
183946	hypothetical protein	0.467428	4.51456	9.27409	0.00232418	0.0422869
3565038	hypothetical protein	-1.29472	-0.505597	9.26602	0.00233445	0.0424323
171778	Uterine Lumin Expressed/locailized	-0.390921	7.38099	9.25624	0.00234694	0.0426178
179899	Metallothionein-2	0.443672	7.31508	9.24333	0.00236355	0.0428777
187006	hypothetical protein	0.862611	1.29718	9.23098	0.00237954	0.0431256
184957	COLlagen	0.594815	2.37232	9.22882	0.00238235	0.0431271
182368	Zinc metalloproteinase nas-7	0.500161	3.97574	9.22736	0.00238425	0.0431271
189764	hypothetical protein	-0.951438	-0.0617153	9.21253	0.00240364	0.0434356
13192832	Uncharacterized protein	-0.393029	4.57297	9.2094	0.00240776	0.0434679
171861	hypothetical protein	0.537295	2.67247	9.20338	0.00241568	0.0435688
4363002	pseudo	-0.700259	0.883686	9.19984	0.00242036	0.043611
171761	hypothetical protein	-0.703029	5.20421	9.19663	0.00242461	0.0436454
259658	Serpentine Receptor, class W	-0.606831	1.76843	9.19359	0.00242864	0.0436757
189866	Neutral Cholesterol Ester Hydrolase homolog	-0.443883	3.16302	9.18778	0.00243636	0.0437722
185746	hypothetical protein	1.04347	-0.161598	9.185	0.00244006	0.0437965
175945	Ankyrin repeat-containing protein F37A4.4	0.585722	2.32889	9.17903	0.00244804	0.0438974
13197055	Seven TM Receptor	-0.440414	5.288	9.15556	0.00247963	0.0444212
174043	hypothetical protein	0.986253	0.260112	9.14053	0.00250009	0.0447446
3565233	Uncharacterized protein	-3.83996	-2.81636	9.1342	0.00250875	0.0448565
181840	hypothetical protein	0.980238	-0.490559	9.12954	0.00251515	0.0449279
188063	hypothetical protein	1.01105	0.525535	9.10689	0.00254649	0.0454441
177375	Uncharacterized protein	-0.34154	5.22982	9.10111	0.00255455	0.0455443
189803	Uncharacterized protein	0.799996	-0.0334164	9.09469	0.00256352	0.0456605
25502985	hypothetical protein	-3.63504	-2.86984	9.09116	0.00256848	0.0457052
178480	Uncharacterized protein	1.20303	-0.197306	9.08862	0.00257204	0.0457249
184246	SCP-Like extracellular protein	-0.817581	2.28232	9.07984	0.00258443	0.0459014
179531	hypothetical protein	0.491108	3.82104	9.07395	0.00259276	0.0459563
173178	hypothetical protein	-1.89048	0.0057139	9.07347	0.00259344	0.0459563
172325	SPerm CHromatin enriched	0.922707	0.841971	9.07243	0.00259492	0.0459563
4926924	hypothetical protein	1.44721	-1.2549	9.06672	0.00260303	0.0460561
172309	hypothetical protein	-0.421435	4.51245	9.05943	0.00261344	0.0461799
172194	hypothetical protein	1.29449	-0.264659	9.05834	0.00261499	0.0461799
181421	Chromodomain-helicase-DNA-binding protein 3 homolog	-0.349371	7.54934	9.05611	0.00261818	0.0461926
3896794	Uncharacterized protein	-0.722588	4.08161	9.04299	0.00263703	0.0464751
3565664	hypothetical protein	-0.572994	1.71422	9.04151	0.00263918	0.0464751
178795	hypothetical protein	0.475116	3.81592	9.03934	0.00264231	0.0464861
24105282	hypothetical protein	1.53337	-1.34531	9.02872	0.00265771	0.046713
188497	SyNaptoBrevin related	1.33236	-0.603785	9.01813	0.00267315	0.0469402
184273	F-box A protein	-1.40482	-0.700877	9.00592	0.00269106	0.0472101
185481	Major sperm protein	1.52372	-1.35942	8.99105	0.00271306	0.0475512
173805	HMG	-0.30884	7.02455	8.98149	0.00272728	0.0477556
3565992	Zinc metalloproteinase nas-23	0.804387	0.505856	8.97745	0.00273331	0.047792
182344	hypothetical protein	1.12467	-0.497254	8.975	0.00273699	0.047792
181587	hypothetical protein	-0.302336	7.69821	8.97481	0.00273727	0.047792
187664	C-type LECtin	-0.45693	3.98992	8.97299	0.00274001	0.047792
178533	Uncharacterized protein	0.375713	7.92884	8.97153	0.00274218	0.047792
4927023	Uncharacterized protein	-0.63768	5.57544	8.96643	0.00274985	0.0478809
178315	Uncharacterized protein	0.860189	1.95395	8.96246	0.00275583	0.0479401
173645	hypothetical protein	-0.342789	5.81241	8.9607	0.00275849	0.0479417
4363043	F-box B protein	-0.549474	1.79459	8.9587	0.00276151	0.0479494
185337	hypothetical protein	0.996168	-0.109437	8.95026	0.0027743	0.0481266
179897	DEAD boX helicase homolog	-0.305465	9.53531	8.93496	0.00279764	0.0484864
174061	BTB (Broad/complex/Tramtrack/Bric a brac) domain protein	1.1178	0.208445	8.93148	0.00280296	0.0485335
187306	hypothetical protein	1.10719	-0.323822	8.9227	0.00281647	0.0487221
187343	hypothetical protein	-3.98942	-0.955855	8.9174	0.00282467	0.0488186
189976	WHiTe (Drosophila) related ABC transporter	1.15509	0.150058	8.91506	0.00282829	0.0488358
174316	Probable 2,4-dienoyl-CoA reductase 3	0.980889	0.266541	8.89332	0.00286216	0.0493536
189082	Tyrosine-protein kinase	1.04647	-0.314606	8.89242	0.00286358	0.0493536
172572	hypothetical protein	0.90689	0.854792	8.88408	0.00287668	0.0495337
187268	Uncharacterized protein	-0.652099	2.11299	8.87927	0.00288427	0.0495898
186249	hypothetical protein	0.832314	1.09718	8.87864	0.00288526	0.0495898
174941	G1/S-specific cyclin-D	-0.381525	5.08285	8.87694	0.00288796	0.0495903
185933	Gastrulation-defective protein 3	-0.432024	3.14522	8.8723	0.00289531	0.0496708
176585	Zinc finger putative Transcription Factor family	-0.385349	4.82039	8.86438	0.00290789	0.0498408
