# Supplementary material for: Comprehensive phenotyping and transcriptome profiling to study nanotoxicity in C. elegans
Source: PeerJ. 2020 Feb 27;8:e8684. doi: 10.7717/peerj.8684 (PMC7049462; doi:10.7717/peerj.8684)
Supplement: Data S2 — Enriched biological processes showing up- and down-regulation patterns are shown for both Ag and SiO2 groups (P < 0.05). Genes with description for the top 20 enriched biological processes are provided. [file peerj-08-8684-s004.xlsx]

## Sheet: AgvsControl
Supplementary data 2. Gene ontology enrichment by GSEA
Positive NES	NAME	GS<br> follow link to MSigDB		GS DETAILS	SIZE	ES	NES	NOM p-val	FDR q-val	FWER p-val	RANK AT MAX	LEADING EDGE	Oberved by GOATOOLS
1	CELL_CYCLE_PROCESS(4)	CELL_CYCLE_PROCESS(4)	GO:0022402	Details ...	452	0.266611	6.6241	0	0	0	10384	tags=82%, list=56%, signal=181%	GO:0022402
2	CELL_CYCLE(4)	CELL_CYCLE(4)	GO:0007049	Details ...	498	0.257684	6.59053	0	0	0	10384	tags=81%, list=56%, signal=178%	NA
3	APOPTOTIC_PROCESS(6)	APOPTOTIC_PROCESS(6)	GO:0006915	Details ...	436	0.259559	6.33182	0	0	0	10384	tags=81%, list=56%, signal=180%	NA
4	DEATH(3)&CELL_DEATH(4)	DEATH(3)&CELL_DEATH(4)	GO:0016265	Details ...	498	0.233599	6.02247	0	0	0	11268	tags=83%, list=61%, signal=206%	NA
5	GAMETE_GENERATION(4)	GAMETE_GENERATION(4)	GO:0007276	Details ...	416	0.251474	5.9817	0	0	0	11654	tags=87%, list=63%, signal=229%	GO:0007276
6	ORGANELLE_FISSION(4)	ORGANELLE_FISSION(4)	GO:0048285	Details ...	343	0.259749	5.75631	0	0	0	10384	tags=81%, list=56%, signal=181%	NA
7	PROGRAMMED_CELL_DEATH(5)	PROGRAMMED_CELL_DEATH(5)	GO:0012501	Details ...	456	0.243572	5.73627	0	0	0	10384	tags=80%, list=56%, signal=176%	NA
8	SEXUAL_REPRODUCTION(3)	SEXUAL_REPRODUCTION(3)	GO:0019953	Details ...	498	0.227303	5.71345	0	0	0	11718	tags=85%, list=63%, signal=224%	NA
9	NUCLEAR_DIVISION(5)	NUCLEAR_DIVISION(5)	GO:0000280	Details ...	341	0.258605	5.62082	0	0	0	10384	tags=81%, list=56%, signal=181%	NA
10	MEIOTIC_CELL_CYCLE(3)	MEIOTIC_CELL_CYCLE(3)	GO:0051321	Details ...	311	0.2692	5.45524	0	0	0	10384	tags=82%, list=56%, signal=183%	NA
11	GERM_CELL_DEVELOPMENT(4)&CELLULAR_PROCESS_INVOLVED_IN_REPRODUCTION_IN_MULTICELLULAR_ORGANISM(4)	GERM_CELL_DEVELOPMENT(4)&CELLULAR_PROCESS_INVOLVED_IN_REPRODUCTION_IN_MULTICELLULAR_ORGANISM(4)	GO:0007281	Details ...	317	0.260147	5.33417	0	0	0	10672	tags=83%, list=57%, signal=191%	NA
12	MEIOTIC_NUCLEAR_DIVISION(4)	MEIOTIC_NUCLEAR_DIVISION(4)	GO:0007126	Details ...	279	0.266331	5.2154	0	0	0	10384	tags=82%, list=56%, signal=183%	NA
13	CHROMOSOME_SEGREGATION(4)	CHROMOSOME_SEGREGATION(4)	GO:0007059	Details ...	171	0.323299	4.94269	0	0	0	9702	tags=84%, list=52%, signal=174%	NA
14	MITOTIC_CELL_CYCLE(5)	MITOTIC_CELL_CYCLE(5)	GO:0000278	Details ...	232	0.273291	4.80521	0	0	0	10851	tags=85%, list=58%, signal=202%	NA
15	MEIOTIC_CELL_CYCLE_PROCESS(4)	MEIOTIC_CELL_CYCLE_PROCESS(4)	GO:1903046	Details ...	155	0.328377	4.74395	0	0	0	9780	tags=85%, list=53%, signal=178%	GO:1903046
16	POSTTRANSCRIPTIONAL_REGULATION_OF_GENE_EXPRESSION(6)	POSTTRANSCRIPTIONAL_REGULATION_OF_GENE_EXPRESSION(6)	GO:0010608	Details ...	160	0.313863	4.57119	0	0	0	9903	tags=84%, list=53%, signal=179%	GO:0010608
17	CELL_DIVISION(4)	CELL_DIVISION(4)	GO:0051301	Details ...	251	0.249656	4.56111	0	0	0	11422	tags=86%, list=61%, signal=220%	NA
18	MEIOTIC_CHROMOSOME_SEGREGATION(5)	MEIOTIC_CHROMOSOME_SEGREGATION(5)	GO:0045132	Details ...	129	0.32544	4.44066	0	0	0	9702	tags=84%, list=52%, signal=175%	NA
19	POSTTRANSCRIPTIONAL_GENE_SILENCING(5)&GENE_SILENCING_BY_RNA(5)&POSTTRANSCRIPTIONAL_GENE_SILENCING_BY_RNA(6)	POSTTRANSCRIPTIONAL_GENE_SILENCING(5)&GENE_SILENCING_BY_RNA(5)&POSTTRANSCRIPTIONAL_GENE_SILENCING_BY_RNA(6)	GO:0016441	Details ...	131	0.332349	4.40652	0	0	0	9903	tags=86%, list=53%, signal=183%	NA
20	REGULATION_OF_CELL_CYCLE(4)	REGULATION_OF_CELL_CYCLE(4)	GO:0051726	Details ...	185	0.275652	4.37809	0	0	0	11007	tags=86%, list=59%, signal=210%	NA
21	MITOTIC_CELL_CYCLE_PROCESS(5)	MITOTIC_CELL_CYCLE_PROCESS(5)	GO:1903047	Details ...	195	0.270553	4.35399	0	0	0	10851	tags=85%, list=58%, signal=202%	NA
22	GENE_SILENCING(4)	GENE_SILENCING(4)	GO:0016458	Details ...	132	0.333415	4.32377	0	0	0	9903	tags=86%, list=53%, signal=183%	GO:0016458
23	RNA_INTERFERENCE(7)	RNA_INTERFERENCE(7)	GO:0016246	Details ...	124	0.332533	4.28127	0	0	0	9903	tags=86%, list=53%, signal=183%	NA
24	DNA_METABOLIC_PROCESS(5)	DNA_METABOLIC_PROCESS(5)	GO:0006259	Details ...	77	0.40134	4.16563	0	0	0	8023	tags=83%, list=43%, signal=146%	GO:0006259
25	MICROTUBULE_CYTOSKELETON_ORGANIZATION(5)	MICROTUBULE_CYTOSKELETON_ORGANIZATION(5)	GO:0000226	Details ...	145	0.291382	4.07996	0	0	0	10782	tags=87%, list=58%, signal=205%	NA
26	OOGENESIS(5)	OOGENESIS(5)	GO:0048477	Details ...	205	0.244237	4.02632	0	0	0	11654	tags=87%, list=63%, signal=230%	NA
27	FEMALE_GAMETE_GENERATION(5)	FEMALE_GAMETE_GENERATION(5)	GO:0007292	Details ...	229	0.223162	3.87521	0	0	0	11654	tags=85%, list=63%, signal=224%	NA
28	REGULATION_OF_GENE_EXPRESSION_EPIGENETIC(6)	REGULATION_OF_GENE_EXPRESSION_EPIGENETIC(6)	GO:0040029	Details ...	150	0.262866	3.80967	0	0	0	9903	tags=79%, list=53%, signal=168%	GO:0040029
29	CELLULAR_MACROMOLECULE_CATABOLIC_PROCESS(5)	CELLULAR_MACROMOLECULE_CATABOLIC_PROCESS(5)	GO:0044265	Details ...	81	0.348363	3.7365	0	0	0	10538	tags=91%, list=57%, signal=210%	NA
30	REGULATION_OF_CELL_CYCLE_PROCESS(5)	REGULATION_OF_CELL_CYCLE_PROCESS(5)	GO:0010564	Details ...	136	0.270316	3.68466	0	0	0	11007	tags=86%, list=59%, signal=209%	NA
31	SINGLE_ORGANISM_METABOLIC_PROCESS(3)	SINGLE_ORGANISM_METABOLIC_PROCESS(3)	GO:0044710	Details ...	404	0.154889	3.65445	0	0	0	12279	tags=81%, list=66%, signal=234%	NA
32	CYTOKINESIS(5)	CYTOKINESIS(5)	GO:0000910	Details ...	74	0.343997	3.5168	0	0	0	10967	tags=93%, list=59%, signal=226%	NA
33	REGULATION_OF_MEIOTIC_CELL_CYCLE(4)	REGULATION_OF_MEIOTIC_CELL_CYCLE(4)	GO:0051445	Details ...	127	0.260216	3.50932	0	0	0	11007	tags=85%, list=59%, signal=207%	NA
34	NUCLEUS_ORGANIZATION(4)	NUCLEUS_ORGANIZATION(4)	GO:0006997	Details ...	37	0.468097	3.4266	0	0	0	9405	tags=97%, list=51%, signal=196%	NA
35	SPINDLE_ORGANIZATION(5)	SPINDLE_ORGANIZATION(5)	GO:0007051	Details ...	89	0.309265	3.41859	0	0	0	10782	tags=89%, list=58%, signal=210%	NA
36	CHROMOSOME_ORGANIZATION(4)	CHROMOSOME_ORGANIZATION(4)	GO:0051276	Details ...	118	0.266216	3.41575	0	0	0	10524	tags=83%, list=57%, signal=190%	GO:0051276
37	CELLULAR_RESPONSE_TO_DNA_DAMAGE_STIMULUS(5)	CELLULAR_RESPONSE_TO_DNA_DAMAGE_STIMULUS(5)	GO:0006974	Details ...	39	0.451517	3.36789	0	0	0	5448	tags=74%, list=29%, signal=105%	GO:0006974
38	REGULATION_OF_NUCLEAR_DIVISION(5)	REGULATION_OF_NUCLEAR_DIVISION(5)	GO:0051783	Details ...	107	0.269408	3.3466	0	0	0	11007	tags=86%, list=59%, signal=209%	NA
39	CELLULAR_PROTEIN_METABOLIC_PROCESS(5)	CELLULAR_PROTEIN_METABOLIC_PROCESS(5)	GO:0044267	Details ...	332	0.154971	3.24213	0	0	0	12908	tags=85%, list=69%, signal=272%	NA
40	REGULATION_OF_ORGANELLE_ORGANIZATION(4)	REGULATION_OF_ORGANELLE_ORGANIZATION(4)	GO:0033043	Details ...	156	0.224027	3.24064	0	0	0	11007	tags=81%, list=59%, signal=198%	NA
41	MODIFICATION_DEPENDENT_MACROMOLECULE_CATABOLIC_PROCESS(6)&PROTEOLYSIS_INVOLVED_IN_CELLULAR_PROTEIN_CATABOLIC_PROCESS(6)&MODIFICATION_DEPENDENT_PROTEIN_CATABOLIC_PROCESS(7)&UBIQUITIN_DEPENDENT_PROTEIN_CATABOLIC_PROCESS(8)	MODIFICATION_DEPENDENT_MACROMOLECULE_CATABOLIC_PROCESS(6)&PROTEOLYSIS_INVOLVED_IN_CELLULAR_PROTEIN_CATABOLIC_PROCESS(6)&MODIFICATION_DEPENDENT_PROTEIN_CATABOLIC_PROCESS(7)&UBIQUITIN_DEPENDENT_PROTEIN_CATABOLIC_PROCESS(8)	GO:0043632	Details ...	36	0.43486	3.22584	0	0	0	10524	tags=100%, list=57%, signal=230%	NA
42	CELLULAR_CATABOLIC_PROCESS(4)	CELLULAR_CATABOLIC_PROCESS(4)	GO:0044248	Details ...	149	0.22519	3.20456	0	0	0	11820	tags=86%, list=64%, signal=234%	NA
43	TRANSLATION(6)	TRANSLATION(6)	GO:0006412	Details ...	49	0.380004	3.14806	0	2.05e-05	0.001	9270	tags=88%, list=50%, signal=175%	NA
44	REGULATION_OF_MITOTIC_CELL_CYCLE(5)	REGULATION_OF_MITOTIC_CELL_CYCLE(5)	GO:0007346	Details ...	73	0.311955	3.14324	0	2e-05	0.001	10524	tags=88%, list=57%, signal=201%	NA
45	CYTOSKELETON_ORGANIZATION(4)	CYTOSKELETON_ORGANIZATION(4)	GO:0007010	Details ...	324	0.149239	3.13289	0	1.96e-05	0.001	14835	tags=94%, list=80%, signal=459%	NA
46	HERMAPHRODITE_GERM_LINE_SEX_DETERMINATION(6)	HERMAPHRODITE_GERM_LINE_SEX_DETERMINATION(6)	GO:0040021	Details ...	46	0.383584	3.13176	0	1.91e-05	0.001	10671	tags=96%, list=57%, signal=224%	NA
47	DNA_REPAIR(4)	DNA_REPAIR(4)	GO:0006281	Details ...	24	0.527524	3.10953	0	1.87e-05	0.001	8023	tags=96%, list=43%, signal=168%	GO:0006281
48	REGULATION_OF_CELL_DIVISION(4)	REGULATION_OF_CELL_DIVISION(4)	GO:0051302	Details ...	133	0.238456	3.10849	0	1.84e-05	0.001	11396	tags=85%, list=61%, signal=218%	NA
49	NCRNA_METABOLIC_PROCESS(6)	NCRNA_METABOLIC_PROCESS(6)	GO:0034660	Details ...	26	0.502506	3.10212	0	1.8e-05	0.001	7833	tags=92%, list=42%, signal=159%	NA
50	SINGLE_ORGANISM_ORGANELLE_ORGANIZATION(4)	SINGLE_ORGANISM_ORGANELLE_ORGANIZATION(4)	GO:1902589	Details ...	492	0.11999	3.06715	0	5.2e-05	0.003	15251	tags=94%, list=82%, signal=507%	NA
51	DNA_RECOMBINATION(6)	DNA_RECOMBINATION(6)	GO:0006310	Details ...	20	0.572395	3.01933	0	6.72e-05	0.004	4243	tags=80%, list=23%, signal=104%	GO:0006310
52	MITOTIC_SPINDLE_ORGANIZATION(6)	MITOTIC_SPINDLE_ORGANIZATION(6)	GO:0007052	Details ...	78	0.293169	2.98431	0	6.59e-05	0.004	10782	tags=87%, list=58%, signal=207%	NA
53	NEGATIVE_REGULATION_OF_CELL_CYCLE(4)	NEGATIVE_REGULATION_OF_CELL_CYCLE(4)	GO:0045786	Details ...	55	0.339686	2.97224	0	6.47e-05	0.004	9592	tags=85%, list=52%, signal=176%	NA
54	MITOTIC_SISTER_CHROMATID_SEGREGATION(6)	MITOTIC_SISTER_CHROMATID_SEGREGATION(6)	GO:0000070	Details ...	44	0.38262	2.96983	0	6.35e-05	0.004	11074	tags=98%, list=60%, signal=241%	NA
55	SISTER_CHROMATID_SEGREGATION(5)	SISTER_CHROMATID_SEGREGATION(5)	GO:0000819	Details ...	45	0.383147	2.96518	0	6.24e-05	0.004	11074	tags=98%, list=60%, signal=241%	NA
56	GERM_LINE_SEX_DETERMINATION(5)	GERM_LINE_SEX_DETERMINATION(5)	GO:0018992	Details ...	50	0.351733	2.93511	0	6.12e-05	0.004	10956	tags=94%, list=59%, signal=228%	NA
57	CELLULAR_LOCALIZATION(3)	CELLULAR_LOCALIZATION(3)	GO:0051641	Details ...	349	0.13877	2.92254	0	6.02e-05	0.004	12333	tags=80%, list=66%, signal=233%	NA
58	MITOTIC_NUCLEAR_DIVISION(5)	MITOTIC_NUCLEAR_DIVISION(5)	GO:0007067	Details ...	94	0.258164	2.87295	0	7.48e-05	0.005	10851	tags=84%, list=58%, signal=201%	NA
59	MACROMOLECULAR_COMPLEX_SUBUNIT_ORGANIZATION(4)	MACROMOLECULAR_COMPLEX_SUBUNIT_ORGANIZATION(4)	GO:0043933	Details ...	321	0.136553	2.872	0	7.35e-05	0.005	14825	tags=93%, list=80%, signal=451%	NA
60	SINGLE_FERTILIZATION(5)	SINGLE_FERTILIZATION(5)	GO:0007338	Details ...	60	0.316483	2.8638	0	7.23e-05	0.005	11179	tags=92%, list=60%, signal=229%	NA
61	FERTILIZATION(4)	FERTILIZATION(4)	GO:0009566	Details ...	61	0.317871	2.83835	0	0.0001	0.007	11179	tags=92%, list=60%, signal=229%	NA
62	NUCLEIC_ACID_PHOSPHODIESTER_BOND_HYDROLYSIS(6)	NUCLEIC_ACID_PHOSPHODIESTER_BOND_HYDROLYSIS(6)	GO:0090305	Details ...	33	0.420914	2.82736	0	0.000113	0.008	7964	tags=85%, list=43%, signal=148%	GO:0090305
63	NCRNA_PROCESSING(7)	NCRNA_PROCESSING(7)	GO:0034470	Details ...	22	0.497979	2.81725	0	0.000111	0.008	7655	tags=91%, list=41%, signal=154%	NA
64	CELLULAR_PROTEIN_CATABOLIC_PROCESS(6)	CELLULAR_PROTEIN_CATABOLIC_PROCESS(6)	GO:0044257	Details ...	42	0.36341	2.80925	0	0.000123	0.009	10524	tags=93%, list=57%, signal=213%	NA
65	MICROTUBULE_BASED_PROCESS(4)	MICROTUBULE_BASED_PROCESS(4)	GO:0007017	Details ...	177	0.181413	2.78128	0	0.000135	0.01	10946	tags=77%, list=59%, signal=185%	NA
66	ESTABLISHMENT_OF_LOCALIZATION_IN_CELL(4)	ESTABLISHMENT_OF_LOCALIZATION_IN_CELL(4)	GO:0051649	Details ...	310	0.139057	2.77724	0	0.000146	0.011	12333	tags=80%, list=66%, signal=234%	NA
67	PROTEIN_COMPLEX_SUBUNIT_ORGANIZATION(5)	PROTEIN_COMPLEX_SUBUNIT_ORGANIZATION(5)	GO:0071822	Details ...	271	0.145816	2.7496	0	0.000143	0.011	14825	tags=94%, list=80%, signal=457%	NA
68	SYNAPSIS(6)&HOMOLOGOUS_CHROMOSOME_SEGREGATION(6)	SYNAPSIS(6)&HOMOLOGOUS_CHROMOSOME_SEGREGATION(6)	GO:0007129	Details ...	12	0.6549	2.72486	0	0.000178	0.014	3325	tags=83%, list=18%, signal=101%	NA
69	NEGATIVE_REGULATION_OF_METABOLIC_PROCESS(3)	NEGATIVE_REGULATION_OF_METABOLIC_PROCESS(3)	GO:0009892	Details ...	240	0.152717	2.72253	0	0.000176	0.014	9903	tags=68%, list=53%, signal=144%	GO:0009892
70	MEIOSIS_I(5)	MEIOSIS_I(5)	GO:0007127	Details ...	21	0.488363	2.70084	0	0.000211	0.017	3325	tags=67%, list=18%, signal=81%	NA
71	PROTEOLYSIS(5)	PROTEOLYSIS(5)	GO:0006508	Details ...	59	0.296677	2.68643	0	0.000221	0.018	10574	tags=86%, list=57%, signal=200%	NA
72	NEGATIVE_REGULATION_OF_MACROMOLECULE_METABOLIC_PROCESS(4)	NEGATIVE_REGULATION_OF_MACROMOLECULE_METABOLIC_PROCESS(4)	GO:0010605	Details ...	231	0.153299	2.6841	0	0.000218	0.018	9903	tags=68%, list=53%, signal=144%	GO:0010605
73	ORGANELLE_LOCALIZATION(4)	ORGANELLE_LOCALIZATION(4)	GO:0051640	Details ...	133	0.201743	2.66069	0	0.000238	0.02	11934	tags=84%, list=64%, signal=233%	NA
74	FEMINIZATION_OF_HERMAPHRODITIC_GERM_LINE(7)	FEMINIZATION_OF_HERMAPHRODITIC_GERM_LINE(7)	GO:0040022	Details ...	32	0.395544	2.65483	0.00197239	0.000247	0.021	10671	tags=97%, list=57%, signal=227%	NA
75	ESTABLISHMENT_OF_ORGANELLE_LOCALIZATION(4)	ESTABLISHMENT_OF_ORGANELLE_LOCALIZATION(4)	GO:0051656	Details ...	130	0.198041	2.63053	0	0.000302	0.026	11934	tags=84%, list=64%, signal=232%	NA
76	REGULATION_OF_MEIOSIS(5)	REGULATION_OF_MEIOSIS(5)	GO:0040020	Details ...	88	0.23872	2.6207	0	0.000321	0.028	11007	tags=83%, list=59%, signal=202%	NA
77	MICROTUBULE_POLYMERIZATION_OR_DEPOLYMERIZATION(6)	MICROTUBULE_POLYMERIZATION_OR_DEPOLYMERIZATION(6)	GO:0031109	Details ...	18	0.516142	2.6093	0	0.000362	0.032	7973	tags=94%, list=43%, signal=165%	NA
78	NEGATIVE_REGULATION_OF_GENE_EXPRESSION(5)	NEGATIVE_REGULATION_OF_GENE_EXPRESSION(5)	GO:0010629	Details ...	207	0.155129	2.60824	0	0.000357	0.032	9903	tags=69%, list=53%, signal=145%	GO:0010629
79	RIBONUCLEOSIDE_METABOLIC_PROCESS(6)	RIBONUCLEOSIDE_METABOLIC_PROCESS(6)	GO:0009119	Details ...	27	0.4151	2.59613	0	0.000397	0.036	10887	tags=100%, list=59%, signal=241%	NA
80	PRONUCLEAR_MIGRATION(6)	PRONUCLEAR_MIGRATION(6)	GO:0035046	Details ...	50	0.30267	2.57433	0	0.000468	0.043	11494	tags=92%, list=62%, signal=240%	NA
81	REGULATION_OF_CELL_PROLIFERATION(4)	REGULATION_OF_CELL_PROLIFERATION(4)	GO:0042127	Details ...	99	0.217282	2.56955	0	0.000494	0.046	11007	tags=81%, list=59%, signal=197%	GO:0042127
82	MALE_GAMETE_GENERATION(5)&SPERMATOGENESIS(6)	MALE_GAMETE_GENERATION(5)&SPERMATOGENESIS(6)	GO:0048232	Details ...	40	0.344471	2.54961	0	0.000572	0.054	7554	tags=75%, list=41%, signal=126%	GO:0048232
83	POSITIVE_REGULATION_OF_MEIOTIC_CELL_CYCLE(4)	POSITIVE_REGULATION_OF_MEIOTIC_CELL_CYCLE(4)	GO:0051446	Details ...	44	0.325816	2.54825	0.00191205	0.000565	0.054	9592	tags=84%, list=52%, signal=173%	NA
84	PHOSPHATE_CONTAINING_COMPOUND_METABOLIC_PROCESS(5)	PHOSPHATE_CONTAINING_COMPOUND_METABOLIC_PROCESS(5)	GO:0006796	Details ...	213	0.146472	2.53019	0	0.000631	0.061	14069	tags=90%, list=76%, signal=366%	NA
85	MACROMOLECULE_MODIFICATION(5)	MACROMOLECULE_MODIFICATION(5)	GO:0043412	Details ...	253	0.138551	2.51941	0	0.000684	0.067	14069	tags=89%, list=76%, signal=362%	NA
86	PHOSPHORUS_METABOLIC_PROCESS(4)	PHOSPHORUS_METABOLIC_PROCESS(4)	GO:0006793	Details ...	214	0.146946	2.51012	0	0.000746	0.074	14069	tags=90%, list=76%, signal=366%	NA
87	REGULATION_OF_DNA_METABOLIC_PROCESS(5)	REGULATION_OF_DNA_METABOLIC_PROCESS(5)	GO:0051052	Details ...	14	0.544044	2.49551	0	0.000816	0.081	5829	tags=86%, list=31%, signal=125%	NA
88	PROTEASOMAL_PROTEIN_CATABOLIC_PROCESS(6)&PROTEASOME_MEDIATED_UBIQUITIN_DEPENDENT_PROTEIN_CATABOLIC_PROCESS(7)	PROTEASOMAL_PROTEIN_CATABOLIC_PROCESS(6)&PROTEASOME_MEDIATED_UBIQUITIN_DEPENDENT_PROTEIN_CATABOLIC_PROCESS(7)	GO:0010498	Details ...	21	0.434509	2.44931	0	0.00109065	0.107	10524	tags=100%, list=57%, signal=230%	NA
89	CHROMOSOME_SEPARATION(5)	CHROMOSOME_SEPARATION(5)	GO:0051304	Details ...	23	0.416949	2.41687	0	0.00135327	0.131	10851	tags=100%, list=58%, signal=240%	NA
90	MASCULINIZATION_OF_HERMAPHRODITIC_GERM_LINE(7)	MASCULINIZATION_OF_HERMAPHRODITIC_GERM_LINE(7)	GO:0042006	Details ...	15	0.516994	2.41582	0	0.00134762	0.132	7749	tags=93%, list=42%, signal=160%	NA
91	NEGATIVE_REGULATION_OF_MITOTIC_CELL_CYCLE(5)	NEGATIVE_REGULATION_OF_MITOTIC_CELL_CYCLE(5)	GO:0045930	Details ...	41	0.314097	2.39497	0.00205761	0.00157893	0.15	9592	tags=83%, list=52%, signal=171%	NA
92	POSITIVE_REGULATION_OF_CELL_CYCLE(4)	POSITIVE_REGULATION_OF_CELL_CYCLE(4)	GO:0045787	Details ...	51	0.28885	2.37349	0	0.00187085	0.179	9592	tags=80%, list=52%, signal=166%	NA
93	CELL_PROLIFERATION(3)	CELL_PROLIFERATION(3)	GO:0008283	Details ...	110	0.192621	2.35794	0.00392927	0.00202896	0.197	11315	tags=80%, list=61%, signal=203%	NA
94	REGULATION_OF_POST_EMBRYONIC_DEVELOPMENT(5)&REGULATION_OF_NEMATODE_LARVAL_DEVELOPMENT(6)	REGULATION_OF_POST_EMBRYONIC_DEVELOPMENT(5)&REGULATION_OF_NEMATODE_LARVAL_DEVELOPMENT(6)	GO:0048580	Details ...	238	0.133938	2.35065	0	0.00207222	0.201	13714	tags=87%, list=74%, signal=327%	NA
95	MICROTUBULE_POLYMERIZATION(7)	MICROTUBULE_POLYMERIZATION(7)	GO:0046785	Details ...	15	0.504939	2.34249	0	0.00214963	0.21	7973	tags=93%, list=43%, signal=163%	NA
96	NUCLEOSIDE_METABOLIC_PROCESS(5)	NUCLEOSIDE_METABOLIC_PROCESS(5)	GO:0009116	Details ...	30	0.348393	2.33952	0	0.00217253	0.214	10887	tags=93%, list=59%, signal=225%	NA
97	PROTEIN_MODIFICATION_PROCESS(5)&CELLULAR_PROTEIN_MODIFICATION_PROCESS(6)	PROTEIN_MODIFICATION_PROCESS(5)&CELLULAR_PROTEIN_MODIFICATION_PROCESS(6)	GO:0036211	Details ...	238	0.133455	2.33784	0	0.00218566	0.216	13801	tags=87%, list=74%, signal=335%	NA
98	VULVAL_DEVELOPMENT(5)	VULVAL_DEVELOPMENT(5)	GO:0040025	Details ...	309	0.11326	2.33329	0	0.00225984	0.222	15260	tags=93%, list=82%, signal=511%	NA
99	RESPONSE_TO_STRESS(3)	RESPONSE_TO_STRESS(3)	GO:0006950	Details ...	456	0.0966	2.33012	0	0.00231603	0.23	13621	tags=83%, list=73%, signal=301%	GO:0006950
100	NUCLEAR_MIGRATION(6)	NUCLEAR_MIGRATION(6)	GO:0007097	Details ...	53	0.269417	2.3271	0.00203252	0.00233602	0.234	11494	tags=89%, list=62%, signal=232%	NA
101	SYNAPTONEMAL_COMPLEX_ORGANIZATION(5)	SYNAPTONEMAL_COMPLEX_ORGANIZATION(5)	GO:0070193	Details ...	10	0.609373	2.32443	0	0.00233017	0.235	3550	tags=80%, list=19%, signal=99%	NA
102	PURINE_NUCLEOSIDE_METABOLIC_PROCESS(6)&PURINE_RIBONUCLEOSIDE_METABOLIC_PROCESS(7)	PURINE_NUCLEOSIDE_METABOLIC_PROCESS(6)&PURINE_RIBONUCLEOSIDE_METABOLIC_PROCESS(7)	GO:0042278	Details ...	22	0.414989	2.32255	0	0.00233285	0.236	10887	tags=100%, list=59%, signal=241%	NA
103	CYTOSKELETON_DEPENDENT_CYTOKINESIS(6)	CYTOSKELETON_DEPENDENT_CYTOKINESIS(6)	GO:0061640	Details ...	32	0.348295	2.31808	0	0.00236121	0.242	10967	tags=94%, list=59%, signal=228%	NA
104	AROMATIC_COMPOUND_CATABOLIC_PROCESS(5)	AROMATIC_COMPOUND_CATABOLIC_PROCESS(5)	GO:0019439	Details ...	51	0.279022	2.31754	0	0.0023471	0.243	9045	tags=76%, list=49%, signal=148%	NA
105	MITOTIC_CYTOKINESIS(6)	MITOTIC_CYTOKINESIS(6)	GO:0000281	Details ...	22	0.410682	2.30731	0	0.00252351	0.261	10967	tags=100%, list=59%, signal=243%	NA
106	ESTABLISHMENT_OF_NUCLEUS_LOCALIZATION(5)&NUCLEUS_LOCALIZATION(5)	ESTABLISHMENT_OF_NUCLEUS_LOCALIZATION(5)&NUCLEUS_LOCALIZATION(5)	GO:0040023	Details ...	54	0.271534	2.30726	0	0.0024997	0.261	11494	tags=89%, list=62%, signal=232%	NA
107	POST_EMBRYONIC_ORGAN_DEVELOPMENT(4)	POST_EMBRYONIC_ORGAN_DEVELOPMENT(4)	GO:0048569	Details ...	312	0.113944	2.3056	0	0.00253351	0.265	15260	tags=93%, list=82%, signal=511%	NA
108	REGULATION_OF_VULVAL_DEVELOPMENT(6)	REGULATION_OF_VULVAL_DEVELOPMENT(6)	GO:0040028	Details ...	228	0.132522	2.28539	0.002	0.00289814	0.3	13714	tags=87%, list=74%, signal=327%	NA
109	REGULATION_OF_CHROMOSOME_SEGREGATION(4)	REGULATION_OF_CHROMOSOME_SEGREGATION(4)	GO:0051983	Details ...	20	0.416882	2.28355	0.00400802	0.00289584	0.302	10851	tags=100%, list=58%, signal=240%	NA
110	DNA_CATABOLIC_PROCESS_ENDONUCLEOLYTIC(7)	DNA_CATABOLIC_PROCESS_ENDONUCLEOLYTIC(7)	GO:0000737	Details ...	17	0.45445	2.26299	0.0059761	0.0033583	0.343	7964	tags=88%, list=43%, signal=154%	NA
111	NUCLEOBASE_CONTAINING_COMPOUND_CATABOLIC_PROCESS(5)	NUCLEOBASE_CONTAINING_COMPOUND_CATABOLIC_PROCESS(5)	GO:0034655	Details ...	49	0.272358	2.2352	0.00392157	0.00404868	0.404	10887	tags=86%, list=59%, signal=206%	NA
112	RNA_MODIFICATION(6)	RNA_MODIFICATION(6)	GO:0009451	Details ...	13	0.511733	2.23228	0.00403226	0.00406799	0.41	7655	tags=92%, list=41%, signal=157%	NA
113	CHROMOSOME_ORGANIZATION_INVOLVED_IN_MEIOSIS(5)	CHROMOSOME_ORGANIZATION_INVOLVED_IN_MEIOSIS(5)	GO:0070192	Details ...	25	0.37694	2.21461	0.00402414	0.00450165	0.444	10851	tags=96%, list=58%, signal=230%	NA
114	RECIPROCAL_MEIOTIC_RECOMBINATION(4)&RECIPROCAL_DNA_RECOMBINATION(7)	RECIPROCAL_MEIOTIC_RECOMBINATION(4)&RECIPROCAL_DNA_RECOMBINATION(7)	GO:0007131	Details ...	12	0.522026	2.20697	0	0.0047289	0.461	7344	tags=92%, list=39%, signal=151%	GO:0007131
115	LIPID_METABOLIC_PROCESS(4)	LIPID_METABOLIC_PROCESS(4)	GO:0006629	Details ...	95	0.194559	2.20564	0	0.00471046	0.461	13038	tags=89%, list=70%, signal=298%	GO:0006629
116	DNA_CATABOLIC_PROCESS(6)	DNA_CATABOLIC_PROCESS(6)	GO:0006308	Details ...	19	0.414211	2.18342	0.00203252	0.0053908	0.516	7964	tags=84%, list=43%, signal=147%	NA
117	NEGATIVE_REGULATION_OF_POST_EMBRYONIC_DEVELOPMENT(4)&NEGATIVE_REGULATION_OF_NEMATODE_LARVAL_DEVELOPMENT(5)	NEGATIVE_REGULATION_OF_POST_EMBRYONIC_DEVELOPMENT(4)&NEGATIVE_REGULATION_OF_NEMATODE_LARVAL_DEVELOPMENT(5)	GO:0048581	Details ...	188	0.13835	2.17495	0.00196464	0.00557412	0.531	11696	tags=77%, list=63%, signal=204%	NA
118	CELLULAR_PROTEIN_COMPLEX_ASSEMBLY(6)	CELLULAR_PROTEIN_COMPLEX_ASSEMBLY(6)	GO:0043623	Details ...	171	0.139689	2.17379	0	0.00556314	0.533	14825	tags=94%, list=80%, signal=457%	NA
119	PROTEIN_MODIFICATION_BY_SMALL_PROTEIN_CONJUGATION(8)	PROTEIN_MODIFICATION_BY_SMALL_PROTEIN_CONJUGATION(8)	GO:0032446	Details ...	33	0.320042	2.17112	0.00419287	0.00563943	0.543	10400	tags=88%, list=56%, signal=199%	NA
120	NEGATIVE_REGULATION_OF_VULVAL_DEVELOPMENT(6)	NEGATIVE_REGULATION_OF_VULVAL_DEVELOPMENT(6)	GO:0040027	Details ...	186	0.135793	2.16071	0.00199203	0.00595424	0.564	11696	tags=76%, list=63%, signal=204%	NA
121	RNA_CATABOLIC_PROCESS(6)	RNA_CATABOLIC_PROCESS(6)	GO:0006401	Details ...	24	0.370683	2.15603	0.00589391	0.00609108	0.579	10161	tags=92%, list=55%, signal=202%	NA
122	SINGLE_ORGANISM_CELLULAR_LOCALIZATION(4)	SINGLE_ORGANISM_CELLULAR_LOCALIZATION(4)	GO:1902580	Details ...	104	0.18028	2.14757	0.00193798	0.00639878	0.599	13652	tags=91%, list=73%, signal=342%	NA
123	NUCLEOSIDE_MONOPHOSPHATE_METABOLIC_PROCESS(6)&RIBONUCLEOSIDE_MONOPHOSPHATE_METABOLIC_PROCESS(7)	NUCLEOSIDE_MONOPHOSPHATE_METABOLIC_PROCESS(6)&RIBONUCLEOSIDE_MONOPHOSPHATE_METABOLIC_PROCESS(7)	GO:0009123	Details ...	18	0.414899	2.14437	0	0.00647524	0.607	10887	tags=100%, list=59%, signal=241%	NA
124	COFACTOR_METABOLIC_PROCESS(4)&COENZYME_METABOLIC_PROCESS(5)	COFACTOR_METABOLIC_PROCESS(4)&COENZYME_METABOLIC_PROCESS(5)	GO:0051186	Details ...	14	0.457755	2.14177	0.00417537	0.00654359	0.613	10089	tags=100%, list=54%, signal=218%	NA
125	DNA_REPLICATION(6)	DNA_REPLICATION(6)	GO:0006260	Details ...	17	0.440193	2.13194	0.00203666	0.00686068	0.632	7135	tags=82%, list=38%, signal=133%	NA
126	SEX_DETERMINATION(4)	SEX_DETERMINATION(4)	GO:0007530	Details ...	57	0.236072	2.13019	0.00402414	0.00685465	0.636	10956	tags=82%, list=59%, signal=200%	NA
127	RNA_PHOSPHODIESTER_BOND_HYDROLYSIS(6)	RNA_PHOSPHODIESTER_BOND_HYDROLYSIS(6)	GO:0090501	Details ...	15	0.438703	2.12847	0.00212314	0.00687751	0.643	7964	tags=87%, list=43%, signal=151%	NA
128	CELLULAR_RESPONSE_TO_STRESS(4)	CELLULAR_RESPONSE_TO_STRESS(4)	GO:0033554	Details ...	143	0.154177	2.1279	0	0.00684382	0.645	12759	tags=84%, list=69%, signal=265%	NA
129	PROTEIN_MODIFICATION_BY_SMALL_PROTEIN_CONJUGATION_OR_REMOVAL(7)	PROTEIN_MODIFICATION_BY_SMALL_PROTEIN_CONJUGATION_OR_REMOVAL(7)	GO:0070647	Details ...	42	0.27464	2.11678	0	0.0073227	0.668	10400	tags=83%, list=56%, signal=189%	NA
130	CELL_CYCLE_SWITCHING_MITOTIC_TO_MEIOTIC_CELL_CYCLE(5)&CELL_CYCLE_SWITCHING(5)&GERMLINE_CELL_CYCLE_SWITCHING_MITOTIC_TO_MEIOTIC_CELL_CYCLE(6)	CELL_CYCLE_SWITCHING_MITOTIC_TO_MEIOTIC_CELL_CYCLE(5)&CELL_CYCLE_SWITCHING(5)&GERMLINE_CELL_CYCLE_SWITCHING_MITOTIC_TO_MEIOTIC_CELL_CYCLE(6)	GO:0051728	Details ...	33	0.316158	2.11672	0.00196464	0.00726637	0.668	7091	tags=70%, list=38%, signal=112%	NA
131	OOCYTE_DIFFERENTIATION(4)	OOCYTE_DIFFERENTIATION(4)	GO:0009994	Details ...	42	0.268118	2.11567	0.00199601	0.00727033	0.672	10521	tags=83%, list=57%, signal=191%	NA
132	NUCLEOSIDE_TRIPHOSPHATE_METABOLIC_PROCESS(6)&PURINE_NUCLEOSIDE_TRIPHOSPHATE_METABOLIC_PROCESS(7)&RIBONUCLEOSIDE_TRIPHOSPHATE_METABOLIC_PROCESS(7)&PURINE_RIBONUCLEOSIDE_TRIPHOSPHATE_METABOLIC_PROCESS(8)&ATP_METABOLIC_PROCESS(8)	NUCLEOSIDE_TRIPHOSPHATE_METABOLIC_PROCESS(6)&PURINE_NUCLEOSIDE_TRIPHOSPHATE_METABOLIC_PROCESS(7)&RIBONUCLEOSIDE_TRIPHOSPHATE_METABOLIC_PROCESS(7)&PURINE_RIBONUCLEOSIDE_TRIPHOSPHATE_METABOLIC_PROCESS(8)&ATP_METABOLIC_PROCESS(8)	GO:0009141	Details ...	16	0.45144	2.11081	0	0.00742592	0.68	9045	tags=94%, list=49%, signal=182%	NA
133	ESTABLISHMENT_OF_SPINDLE_LOCALIZATION(4)&SPINDLE_LOCALIZATION(5)	ESTABLISHMENT_OF_SPINDLE_LOCALIZATION(4)&SPINDLE_LOCALIZATION(5)	GO:0051293	Details ...	51	0.246879	2.09496	0	0.00818006	0.717	13652	tags=98%, list=73%, signal=368%	NA
134	GLYCOSYL_COMPOUND_METABOLIC_PROCESS(4)	GLYCOSYL_COMPOUND_METABOLIC_PROCESS(4)	GO:1901657	Details ...	31	0.320537	2.09368	0	0.00819716	0.72	9045	tags=81%, list=49%, signal=157%	NA
135	ORGANIC_CYCLIC_COMPOUND_CATABOLIC_PROCESS(5)	ORGANIC_CYCLIC_COMPOUND_CATABOLIC_PROCESS(5)	GO:1901361	Details ...	54	0.241474	2.09299	0.00194932	0.0081885	0.722	11707	tags=87%, list=63%, signal=234%	NA
136	EMBRYONIC_PATTERN_SPECIFICATION(5)	EMBRYONIC_PATTERN_SPECIFICATION(5)	GO:0009880	Details ...	21	0.369016	2.08987	0.00404858	0.00824949	0.725	10855	tags=95%, list=58%, signal=229%	NA
137	PROTEIN_COMPLEX_BIOGENESIS(4)&PROTEIN_COMPLEX_ASSEMBLY(5)	PROTEIN_COMPLEX_BIOGENESIS(4)&PROTEIN_COMPLEX_ASSEMBLY(5)	GO:0070271	Details ...	182	0.132601	2.08977	0.00202429	0.00819615	0.725	14825	tags=93%, list=80%, signal=453%	NA
138	MITOTIC_SISTER_CHROMATID_SEPARATION(6)	MITOTIC_SISTER_CHROMATID_SEPARATION(6)	GO:0051306	Details ...	17	0.416815	2.07845	0.00397614	0.00878521	0.748	10851	tags=100%, list=58%, signal=240%	NA
139	CELLULAR_COMPONENT_DISASSEMBLY(4)	CELLULAR_COMPONENT_DISASSEMBLY(4)	GO:0022411	Details ...	33	0.309351	2.0771	0.00199601	0.0088279	0.755	12289	tags=97%, list=66%, signal=285%	NA
140	REGULATION_OF_MITOTIC_NUCLEAR_DIVISION(6)	REGULATION_OF_MITOTIC_NUCLEAR_DIVISION(6)	GO:0007088	Details ...	17	0.416815	2.0674	0.00410678	0.00926615	0.776	10851	tags=100%, list=58%, signal=240%	NA
141	CELLULAR_NITROGEN_COMPOUND_CATABOLIC_PROCESS(5)&HETEROCYCLE_CATABOLIC_PROCESS(5)	CELLULAR_NITROGEN_COMPOUND_CATABOLIC_PROCESS(5)&HETEROCYCLE_CATABOLIC_PROCESS(5)	GO:0044270	Details ...	53	0.239008	2.06156	0.002	0.00955757	0.789	11707	tags=87%, list=63%, signal=234%	NA
142	MACROMOLECULAR_COMPLEX_ASSEMBLY(5)	MACROMOLECULAR_COMPLEX_ASSEMBLY(5)	GO:0065003	Details ...	193	0.126323	2.05991	0	0.00961896	0.798	14825	tags=92%, list=80%, signal=450%	NA
143	GLYCEROLIPID_METABOLIC_PROCESS(5)	GLYCEROLIPID_METABOLIC_PROCESS(5)	GO:0046486	Details ...	27	0.32145	2.01806	0.00963391	0.0123832	0.87	12626	tags=100%, list=68%, signal=311%	NA
144	OOCYTE_DEVELOPMENT(5)	OOCYTE_DEVELOPMENT(5)	GO:0048599	Details ...	41	0.26403	2.01423	0.00865801	0.0126101	0.874	10521	tags=83%, list=57%, signal=191%	NA
145	CELLULAR_LIPID_METABOLIC_PROCESS(4)	CELLULAR_LIPID_METABOLIC_PROCESS(4)	GO:0044255	Details ...	61	0.217574	2.01281	0.00207469	0.0126197	0.875	13038	tags=92%, list=70%, signal=306%	GO:0044255
146	REGULATION_OF_TRANSLATION(6)	REGULATION_OF_TRANSLATION(6)	GO:0006417	Details ...	25	0.345248	2.01278	0	0.0125397	0.876	4745	tags=60%, list=26%, signal=80%	GO:0006417
147	RNA_PROCESSING(6)	RNA_PROCESSING(6)	GO:0006396	Details ...	47	0.246215	2.00585	0.0105932	0.0129758	0.892	11654	tags=87%, list=63%, signal=233%	NA
148	PURINE_NUCLEOSIDE_MONOPHOSPHATE_METABOLIC_PROCESS(7)&PURINE_RIBONUCLEOSIDE_MONOPHOSPHATE_METABOLIC_PROCESS(8)	PURINE_NUCLEOSIDE_MONOPHOSPHATE_METABOLIC_PROCESS(7)&PURINE_RIBONUCLEOSIDE_MONOPHOSPHATE_METABOLIC_PROCESS(8)	GO:0009126	Details ...	17	0.414877	2.00447	0.00198413	0.0129758	0.895	10887	tags=100%, list=59%, signal=241%	NA
149	CELLULAR_MACROMOLECULAR_COMPLEX_ASSEMBLY(6)	CELLULAR_MACROMOLECULAR_COMPLEX_ASSEMBLY(6)	GO:0034622	Details ...	181	0.132195	1.99828	0.0104603	0.0133797	0.904	14825	tags=93%, list=80%, signal=453%	NA
150	RESPONSE_TO_TRANSITION_METAL_NANOPARTICLE(4)	RESPONSE_TO_TRANSITION_METAL_NANOPARTICLE(4)	GO:1990267	Details ...	18	0.386963	1.99338	0.00816326	0.013628	0.915	11406	tags=100%, list=61%, signal=258%	NA
151	MICROTUBULE_ORGANIZING_CENTER_ORGANIZATION(4)&CENTROSOME_ORGANIZATION(5)	MICROTUBULE_ORGANIZING_CENTER_ORGANIZATION(4)&CENTROSOME_ORGANIZATION(5)	GO:0031023	Details ...	13	0.451492	1.97675	0.00591716	0.0149506	0.932	7344	tags=85%, list=39%, signal=140%	NA
152	REGULATION_OF_PHOSPHORUS_METABOLIC_PROCESS(5)&REGULATION_OF_PHOSPHATE_METABOLIC_PROCESS(6)	REGULATION_OF_PHOSPHORUS_METABOLIC_PROCESS(5)&REGULATION_OF_PHOSPHATE_METABOLIC_PROCESS(6)	GO:0051174	Details ...	55	0.224015	1.97352	0.00967118	0.0151935	0.936	12751	tags=91%, list=69%, signal=288%	NA
153	NUCLEAR_TRANSCRIBED_MRNA_CATABOLIC_PROCESS(8)	NUCLEAR_TRANSCRIBED_MRNA_CATABOLIC_PROCESS(8)	GO:0000956	Details ...	17	0.395076	1.96719	0.00606061	0.0156759	0.939	10161	tags=94%, list=55%, signal=207%	NA
154	MITOCHONDRION_ORGANIZATION(4)	MITOCHONDRION_ORGANIZATION(4)	GO:0007005	Details ...	20	0.362888	1.96665	0.0103306	0.0156304	0.939	7205	tags=75%, list=39%, signal=122%	NA
155	ESTABLISHMENT_OF_MITOTIC_SPINDLE_ORIENTATION(6)	ESTABLISHMENT_OF_MITOTIC_SPINDLE_ORIENTATION(6)	GO:0000132	Details ...	28	0.301394	1.95535	0.00796813	0.0165267	0.951	9678	tags=82%, list=52%, signal=171%	NA
156	REGULATION_OF_SISTER_CHROMATID_SEGREGATION(5)&REGULATION_OF_MITOTIC_SISTER_CHROMATID_SEGREGATION(6)	REGULATION_OF_SISTER_CHROMATID_SEGREGATION(5)&REGULATION_OF_MITOTIC_SISTER_CHROMATID_SEGREGATION(6)	GO:0033045	Details ...	15	0.41677	1.94499	0.00809717	0.0175182	0.961	10851	tags=100%, list=58%, signal=240%	NA
157	ESTABLISHMENT_OF_SPINDLE_ORIENTATION(5)	ESTABLISHMENT_OF_SPINDLE_ORIENTATION(5)	GO:0051294	Details ...	34	0.271221	1.93699	0.0039604	0.0182396	0.969	9732	tags=79%, list=52%, signal=166%	NA
158	PHOSPHORYLATION(6)	PHOSPHORYLATION(6)	GO:0016310	Details ...	130	0.14554	1.92768	0.00408163	0.0190456	0.971	14477	tags=92%, list=78%, signal=414%	NA
159	PHAGOCYTOSIS(4)	PHAGOCYTOSIS(4)	GO:0006909	Details ...	109	0.156853	1.92254	0.0101626	0.0195883	0.975	13648	tags=89%, list=73%, signal=332%	NA
160	GENERATION_OF_PRECURSOR_METABOLITES_AND_ENERGY(4)	GENERATION_OF_PRECURSOR_METABOLITES_AND_ENERGY(4)	GO:0006091	Details ...	18	0.370002	1.91491	0.00591716	0.0202991	0.978	10688	tags=94%, list=57%, signal=222%	NA
161	ORGANOPHOSPHATE_METABOLIC_PROCESS(4)	ORGANOPHOSPHATE_METABOLIC_PROCESS(4)	GO:0019637	Details ...	79	0.181071	1.91404	0.0123457	0.0202167	0.979	12182	tags=84%, list=66%, signal=241%	NA
162	ESTABLISHMENT_OF_MITOTIC_SPINDLE_LOCALIZATION(5)	ESTABLISHMENT_OF_MITOTIC_SPINDLE_LOCALIZATION(5)	GO:0040001	Details ...	41	0.252628	1.91273	0.0122699	0.0201998	0.979	10279	tags=80%, list=55%, signal=180%	NA
163	REGULATION_OF_PHOSPHORYLATION(7)	REGULATION_OF_PHOSPHORYLATION(7)	GO:0042325	Details ...	53	0.22055	1.90719	0.00197628	0.0205977	0.98	12751	tags=91%, list=69%, signal=287%	NA
164	NEGATIVE_REGULATION_OF_DEVELOPMENTAL_PROCESS(3)	NEGATIVE_REGULATION_OF_DEVELOPMENTAL_PROCESS(3)	GO:0051093	Details ...	206	0.114986	1.90362	0.0118343	0.0209383	0.98	11696	tags=74%, list=63%, signal=198%	NA
165	METAPHASE_ANAPHASE_TRANSITION_OF_CELL_CYCLE(6)&REGULATION_OF_MITOTIC_SISTER_CHROMATID_SEPARATION(7)	METAPHASE_ANAPHASE_TRANSITION_OF_CELL_CYCLE(6)&REGULATION_OF_MITOTIC_SISTER_CHROMATID_SEPARATION(7)	GO:0044784	Details ...	14	0.416747	1.89931	0.00773694	0.0212144	0.982	10851	tags=100%, list=58%, signal=240%	NA
166	GLYCEROPHOSPHOLIPID_METABOLIC_PROCESS(6)	GLYCEROPHOSPHOLIPID_METABOLIC_PROCESS(6)	GO:0006650	Details ...	24	0.321398	1.89922	0.0143737	0.0210918	0.982	12626	tags=100%, list=68%, signal=311%	NA
167	APOPTOTIC_CELL_CLEARANCE(5)	APOPTOTIC_CELL_CLEARANCE(5)	GO:0043277	Details ...	105	0.1535	1.89118	0.00793651	0.0219596	0.984	14694	tags=94%, list=79%, signal=447%	NA
168	CYTOPLASMIC_TRANSPORT(6)	CYTOPLASMIC_TRANSPORT(6)	GO:0016482	Details ...	25	0.312888	1.88127	0.0141129	0.0231245	0.987	9809	tags=84%, list=53%, signal=178%	NA
169	PROTEIN_UBIQUITINATION(9)	PROTEIN_UBIQUITINATION(9)	GO:0016567	Details ...	28	0.298278	1.87749	0.0101215	0.0235176	0.99	10400	tags=86%, list=56%, signal=194%	NA
170	CELL_CYCLE_PHASE_TRANSITION(5)	CELL_CYCLE_PHASE_TRANSITION(5)	GO:0044770	Details ...	19	0.364174	1.86609	0.00990099	0.0250125	0.994	10851	tags=95%, list=58%, signal=227%	NA
171	CARBOHYDRATE_DERIVATIVE_METABOLIC_PROCESS(4)	CARBOHYDRATE_DERIVATIVE_METABOLIC_PROCESS(4)	GO:1901135	Details ...	86	0.169064	1.84695	0.00816326	0.0276271	0.995	13952	tags=92%, list=75%, signal=366%	NA
172	MEIOSIS_II(5)	MEIOSIS_II(5)	GO:0007135	Details ...	13	0.416725	1.84525	0.0138067	0.0277303	0.995	10851	tags=100%, list=58%, signal=240%	NA
173	CENTROSOME_CYCLE(5)	CENTROSOME_CYCLE(5)	GO:0007098	Details ...	12	0.438639	1.83376	0.00974659	0.0293667	0.997	7344	tags=83%, list=39%, signal=138%	NA
174	MRNA_METABOLIC_PROCESS(6)	MRNA_METABOLIC_PROCESS(6)	GO:0016071	Details ...	48	0.22515	1.83303	0.00808081	0.0293276	0.997	11707	tags=85%, list=63%, signal=230%	NA
175	COFACTOR_BIOSYNTHETIC_PROCESS(5)&COENZYME_BIOSYNTHETIC_PROCESS(6)	COFACTOR_BIOSYNTHETIC_PROCESS(5)&COENZYME_BIOSYNTHETIC_PROCESS(6)	GO:0051188	Details ...	11	0.457681	1.82795	0.0148936	0.0299932	0.998	10089	tags=100%, list=54%, signal=218%	NA
176	MRNA_CATABOLIC_PROCESS(7)	MRNA_CATABOLIC_PROCESS(7)	GO:0006402	Details ...	19	0.348631	1.82282	0.0160643	0.0307835	0.998	10161	tags=89%, list=55%, signal=197%	NA
177	NEGATIVE_REGULATION_OF_CELL_CYCLE_PROCESS(4)	NEGATIVE_REGULATION_OF_CELL_CYCLE_PROCESS(4)	GO:0010948	Details ...	12	0.434298	1.82252	0.0182556	0.0306591	0.998	10524	tags=100%, list=57%, signal=230%	NA
178	REGULATION_OF_MICROTUBULE_BASED_PROCESS(4)	REGULATION_OF_MICROTUBULE_BASED_PROCESS(4)	GO:0032886	Details ...	21	0.339163	1.80996	0.0201207	0.0325869	0.998	10524	tags=90%, list=57%, signal=208%	NA
179	RESPONSE_TO_INORGANIC_SUBSTANCE(4)	RESPONSE_TO_INORGANIC_SUBSTANCE(4)	GO:0010035	Details ...	47	0.223355	1.8069	0.010661	0.0330367	0.998	13265	tags=94%, list=71%, signal=326%	NA
180	RIBOSOME_BIOGENESIS(5)	RIBOSOME_BIOGENESIS(5)	GO:0042254	Details ...	10	0.467664	1.80497	0.00790514	0.0331811	0.998	9903	tags=100%, list=53%, signal=214%	NA
181	ENDOSOMAL_TRANSPORT(5)	ENDOSOMAL_TRANSPORT(5)	GO:0016197	Details ...	20	0.323223	1.79955	0.015534	0.03415	0.999	11661	tags=95%, list=63%, signal=254%	NA
182	REGULATION_OF_MICROTUBULE_CYTOSKELETON_ORGANIZATION(5)	REGULATION_OF_MICROTUBULE_CYTOSKELETON_ORGANIZATION(5)	GO:0070507	Details ...	20	0.334378	1.79873	0.0163265	0.0340876	0.999	10524	tags=90%, list=57%, signal=207%	NA
183	RNA_PHOSPHODIESTER_BOND_HYDROLYSIS_ENDONUCLEOLYTIC(7)	RNA_PHOSPHODIESTER_BOND_HYDROLYSIS_ENDONUCLEOLYTIC(7)	GO:0090502	Details ...	11	0.451596	1.79838	0.0122699	0.0339807	0.999	6821	tags=82%, list=37%, signal=129%	NA
184	DEFENSE_RESPONSE(4)	DEFENSE_RESPONSE(4)	GO:0006952	Details ...	228	0.102637	1.79047	0.0138067	0.0352058	0.999	13692	tags=84%, list=74%, signal=314%	NA
185	MEIOTIC_SISTER_CHROMATID_SEGREGATION(6)	MEIOTIC_SISTER_CHROMATID_SEGREGATION(6)	GO:0045144	Details ...	12	0.416703	1.76878	0.0232108	0.0391543	1	10851	tags=100%, list=58%, signal=240%	NA
186	OXIDATIVE_PHOSPHORYLATION(5)	OXIDATIVE_PHOSPHORYLATION(5)	GO:0006119	Details ...	11	0.444523	1.76791	0.0216963	0.0391122	1	8643	tags=91%, list=46%, signal=170%	NA
187	PROTEIN_PHOSPHORYLATION(7)	PROTEIN_PHOSPHORYLATION(7)	GO:0006468	Details ...	100	0.152264	1.76375	0.0257937	0.0398255	1	14477	tags=93%, list=78%, signal=418%	NA
188	PROTEIN_TRANSPORT(5)	PROTEIN_TRANSPORT(5)	GO:0015031	Details ...	49	0.209681	1.76023	0.0257511	0.0402797	1	13188	tags=92%, list=71%, signal=315%	NA
189	ESTABLISHMENT_OR_MAINTENANCE_OF_CELL_POLARITY(4)	ESTABLISHMENT_OR_MAINTENANCE_OF_CELL_POLARITY(4)	GO:0007163	Details ...	63	0.185999	1.75829	0.0172084	0.0404388	1	13672	tags=92%, list=74%, signal=347%	NA
190	ANTERIOR_POSTERIOR_AXIS_SPECIFICATION(6)	ANTERIOR_POSTERIOR_AXIS_SPECIFICATION(6)	GO:0009948	Details ...	17	0.357937	1.75508	0.0231092	0.0409141	1	10851	tags=94%, list=58%, signal=226%	NA
191	MEMBRANE_ORGANIZATION(4)	MEMBRANE_ORGANIZATION(4)	GO:0061024	Details ...	131	0.133435	1.75228	0.0241935	0.0413253	1	13434	tags=85%, list=72%, signal=306%	NA
192	PROTEIN_POLYMERIZATION(7)	PROTEIN_POLYMERIZATION(7)	GO:0051258	Details ...	27	0.283607	1.75148	0.0255906	0.041277	1	9885	tags=81%, list=53%, signal=174%	NA
193	REGULATION_OF_PROTEIN_METABOLIC_PROCESS(5)	REGULATION_OF_PROTEIN_METABOLIC_PROCESS(5)	GO:0051246	Details ...	99	0.153462	1.74695	0.0192308	0.0420246	1	12751	tags=84%, list=69%, signal=265%	NA
194	REGULATION_OF_PROTEIN_PHOSPHORYLATION(7)	REGULATION_OF_PROTEIN_PHOSPHORYLATION(7)	GO:0001932	Details ...	42	0.223643	1.74149	0.021611	0.0430027	1	13560	tags=95%, list=73%, signal=351%	NA
195	REGULATION_OF_CELLULAR_PROTEIN_METABOLIC_PROCESS(5)	REGULATION_OF_CELLULAR_PROTEIN_METABOLIC_PROCESS(5)	GO:0032268	Details ...	93	0.15374	1.73855	0.00785855	0.0434327	1	12751	tags=84%, list=69%, signal=266%	NA
196	INTRACELLULAR_PROTEIN_TRANSPORT(6)	INTRACELLULAR_PROTEIN_TRANSPORT(6)	GO:0006886	Details ...	18	0.338782	1.73746	0.0221774	0.0434357	1	11268	tags=94%, list=61%, signal=239%	NA
197	REGULATION_OF_CHROMOSOME_ORGANIZATION(5)	REGULATION_OF_CHROMOSOME_ORGANIZATION(5)	GO:0033044	Details ...	20	0.316774	1.725	0.0221328	0.0460184	1	10851	tags=90%, list=58%, signal=216%	NA
198	POSITIVE_REGULATION_OF_CELL_DIVISION(4)	POSITIVE_REGULATION_OF_CELL_DIVISION(4)	GO:0051781	Details ...	10	0.441451	1.72274	0.0183673	0.0463694	1	6671	tags=80%, list=36%, signal=125%	NA
199	AXIS_SPECIFICATION(5)	AXIS_SPECIFICATION(5)	GO:0009798	Details ...	23	0.300541	1.71668	0.0291667	0.0475797	1	11396	tags=91%, list=61%, signal=236%	NA
200	RESPONSE_TO_RADIATION(4)	RESPONSE_TO_RADIATION(4)	GO:0009314	Details ...	21	0.309471	1.71475	0.027027	0.0477704	1	10190	tags=86%, list=55%, signal=189%	NA
201	SMALL_MOLECULE_METABOLIC_PROCESS(4)	SMALL_MOLECULE_METABOLIC_PROCESS(4)	GO:0044281	Details ...	140	0.122025	1.70297	0.0332031	0.0506131	1	13952	tags=87%, list=75%, signal=346%	GO:0044281
202	STRIATED_MUSCLE_MYOSIN_THICK_FILAMENT_ASSEMBLY(5)&MYOSIN_FILAMENT_ORGANIZATION(6)&MYOSIN_FILAMENT_ASSEMBLY(7)	STRIATED_MUSCLE_MYOSIN_THICK_FILAMENT_ASSEMBLY(5)&MYOSIN_FILAMENT_ORGANIZATION(6)&MYOSIN_FILAMENT_ASSEMBLY(7)	GO:0071688	Details ...	127	0.132772	1.70284	0.027833	0.0503918	1	14825	tags=93%, list=80%, signal=455%	NA
203	RESPONSE_TO_IONIZING_RADIATION(5)	RESPONSE_TO_IONIZING_RADIATION(5)	GO:0010212	Details ...	14	0.380837	1.70234	0.0159363	0.050312	1	10190	tags=93%, list=55%, signal=205%	NA
204	ORGANONITROGEN_COMPOUND_METABOLIC_PROCESS(4)	ORGANONITROGEN_COMPOUND_METABOLIC_PROCESS(4)	GO:1901564	Details ...	100	0.148077	1.70227	0.0350877	0.0500697	1	11951	tags=79%, list=64%, signal=220%	NA
205	REGULATION_OF_TRANSFERASE_ACTIVITY(5)	REGULATION_OF_TRANSFERASE_ACTIVITY(5)	GO:0051338	Details ...	40	0.221233	1.70193	0.0286807	0.0499265	1	13560	tags=95%, list=73%, signal=350%	NA
206	ENDOMEMBRANE_SYSTEM_ORGANIZATION(4)	ENDOMEMBRANE_SYSTEM_ORGANIZATION(4)	GO:0010256	Details ...	22	0.299598	1.69879	0.0210526	0.0505841	1	12185	tags=95%, list=66%, signal=277%	NA
207	FEMALE_MEIOTIC_DIVISION(5)	FEMALE_MEIOTIC_DIVISION(5)	GO:0007143	Details ...	15	0.353763	1.69426	0.0394191	0.0514771	1	10782	tags=93%, list=58%, signal=222%	NA
208	SPERMATID_DIFFERENTIATION(4)&SPERMATID_DEVELOPMENT(5)	SPERMATID_DIFFERENTIATION(4)&SPERMATID_DEVELOPMENT(5)	GO:0048515	Details ...	13	0.387323	1.69023	0.03	0.0522174	1	7106	tags=77%, list=38%, signal=124%	NA
209	GENE_SILENCING_BY_MIRNA(7)	GENE_SILENCING_BY_MIRNA(7)	GO:0035195	Details ...	8	0.488514	1.68461	0.0295276	0.0534127	1	7190	tags=88%, list=39%, signal=143%	NA
210	VACUOLE_ORGANIZATION(4)	VACUOLE_ORGANIZATION(4)	GO:0007033	Details ...	21	0.305246	1.68042	0.0218688	0.0542618	1	11154	tags=90%, list=60%, signal=226%	NA
211	PROTEIN_UBIQUITINATION_INVOLVED_IN_UBIQUITIN_DEPENDENT_PROTEIN_CATABOLIC_PROCESS(9)	PROTEIN_UBIQUITINATION_INVOLVED_IN_UBIQUITIN_DEPENDENT_PROTEIN_CATABOLIC_PROCESS(9)	GO:0042787	Details ...	9	0.454081	1.67825	0.0366795	0.0545206	1	10155	tags=100%, list=55%, signal=220%	NA
212	LIPID_LOCALIZATION(4)	LIPID_LOCALIZATION(4)	GO:0010876	Details ...	448	0.0680305	1.67406	0.0241935	0.0553357	1	13251	tags=78%, list=71%, signal=265%	NA
213	SPINDLE_ELONGATION(5)	SPINDLE_ELONGATION(5)	GO:0051231	Details ...	10	0.42037	1.67227	0.0298211	0.0555414	1	10782	tags=100%, list=58%, signal=238%	NA
214	CELL_CYCLE_CHECKPOINT(5)	CELL_CYCLE_CHECKPOINT(5)	GO:0000075	Details ...	12	0.390425	1.66852	0.0168067	0.056263	1	8240	tags=83%, list=44%, signal=150%	NA
215	GLYCEROLIPID_BIOSYNTHETIC_PROCESS(5)	GLYCEROLIPID_BIOSYNTHETIC_PROCESS(5)	GO:0045017	Details ...	19	0.321311	1.66294	0.0256917	0.057564	1	12626	tags=100%, list=68%, signal=311%	NA
216	MAINTENANCE_OF_LOCATION(3)	MAINTENANCE_OF_LOCATION(3)	GO:0051235	Details ...	455	0.0670358	1.65251	0.0469083	0.0602864	1	13251	tags=78%, list=71%, signal=264%	NA
217	PHOSPHATIDYLINOSITOL_METABOLIC_PROCESS(7)	PHOSPHATIDYLINOSITOL_METABOLIC_PROCESS(7)	GO:0046488	Details ...	14	0.349855	1.63834	0.028	0.0643751	1	12094	tags=100%, list=65%, signal=286%	NA
218	REGULATION_OF_CATALYTIC_ACTIVITY(4)	REGULATION_OF_CATALYTIC_ACTIVITY(4)	GO:0050790	Details ...	76	0.152961	1.63274	0.0362173	0.06578	1	13560	tags=88%, list=73%, signal=324%	NA
219	PHAGOCYTOSIS_ENGULFMENT(5)&MEMBRANE_INVAGINATION(5)	PHAGOCYTOSIS_ENGULFMENT(5)&MEMBRANE_INVAGINATION(5)	GO:0006911	Details ...	92	0.145278	1.63184	0.0429448	0.0658363	1	14694	tags=93%, list=79%, signal=443%	NA
220	ESTABLISHMENT_OF_CELL_POLARITY(5)	ESTABLISHMENT_OF_CELL_POLARITY(5)	GO:0030010	Details ...	46	0.200202	1.62132	0.034	0.0683447	1	14477	tags=98%, list=78%, signal=441%	NA
221	INNATE_IMMUNE_RESPONSE(4)	INNATE_IMMUNE_RESPONSE(4)	GO:0045087	Details ...	138	0.118142	1.62116	0.0375494	0.0680847	1	13315	tags=83%, list=72%, signal=291%	GO:0045087
222	MITOTIC_CELL_CYCLE_PHASE_TRANSITION(6)	MITOTIC_CELL_CYCLE_PHASE_TRANSITION(6)	GO:0044772	Details ...	14	0.362863	1.61735	0.0293542	0.0689947	1	10524	tags=93%, list=57%, signal=214%	NA
223	DSRNA_FRAGMENTATION(4)&RESPONSE_TO_ORGANIC_CYCLIC_COMPOUND(5)&RESPONSE_TO_DSRNA(5)&PRODUCTION_OF_SMALL_RNA_INVOLVED_IN_GENE_SILENCING_BY_RNA(5)&CELLULAR_RESPONSE_TO_DSRNA(6)&CELLULAR_RESPONSE_TO_ORGANIC_CYCLIC_COMPOUND(6)	DSRNA_FRAGMENTATION(4)&RESPONSE_TO_ORGANIC_CYCLIC_COMPOUND(5)&RESPONSE_TO_DSRNA(5)&PRODUCTION_OF_SMALL_RNA_INVOLVED_IN_GENE_SILENCING_BY_RNA(5)&CELLULAR_RESPONSE_TO_DSRNA(6)&CELLULAR_RESPONSE_TO_ORGANIC_CYCLIC_COMPOUND(6)	GO:0031050	Details ...	10	0.421016	1.61506	0.045977	0.0693518	1	10770	tags=100%, list=58%, signal=237%	NA
224	METAPHASE_ANAPHASE_TRANSITION_OF_MITOTIC_CELL_CYCLE(5)&ANAPHASE_PROMOTING_COMPLEX_DEPENDENT_PROTEASOMAL_UBIQUITIN_DEPENDENT_PROTEIN_CATABOLIC_PROCESS(8)	METAPHASE_ANAPHASE_TRANSITION_OF_MITOTIC_CELL_CYCLE(5)&ANAPHASE_PROMOTING_COMPLEX_DEPENDENT_PROTEASOMAL_UBIQUITIN_DEPENDENT_PROTEIN_CATABOLIC_PROCESS(8)	GO:0007091	Details ...	10	0.434252	1.60923	0.0374753	0.0711034	1	10524	tags=100%, list=57%, signal=230%	NA
225	RESPONSE_TO_OXIDATIVE_STRESS(4)	RESPONSE_TO_OXIDATIVE_STRESS(4)	GO:0006979	Details ...	38	0.218306	1.60891	0.0365854	0.0708826	1	9650	tags=74%, list=52%, signal=153%	NA
226	ENGULFMENT_OF_APOPTOTIC_CELL(6)	ENGULFMENT_OF_APOPTOTIC_CELL(6)	GO:0043652	Details ...	88	0.142268	1.59026	0.0321285	0.0763207	1	14694	tags=93%, list=79%, signal=442%	NA
227	REGULATION_OF_KINASE_ACTIVITY(6)	REGULATION_OF_KINASE_ACTIVITY(6)	GO:0043549	Details ...	37	0.217135	1.58718	0.0426829	0.0767851	1	13560	tags=95%, list=73%, signal=349%	NA
228	NEGATIVE_REGULATION_OF_TRANSLATION(6)	NEGATIVE_REGULATION_OF_TRANSLATION(6)	GO:0017148	Details ...	13	0.360905	1.587	0.0297619	0.0765296	1	4736	tags=62%, list=25%, signal=83%	NA
229	ENERGY_DERIVATION_BY_OXIDATION_OF_ORGANIC_COMPOUNDS(4)	ENERGY_DERIVATION_BY_OXIDATION_OF_ORGANIC_COMPOUNDS(4)	GO:0015980	Details ...	14	0.354037	1.58479	0.0380762	0.0766996	1	10688	tags=93%, list=57%, signal=218%	NA
230	NOTCH_SIGNALING_PATHWAY(6)	NOTCH_SIGNALING_PATHWAY(6)	GO:0007219	Details ...	23	0.272649	1.58224	0.0393701	0.0772946	1	10297	tags=83%, list=55%, signal=185%	NA
231	ESTABLISHMENT_OF_PROTEIN_LOCALIZATION(4)	ESTABLISHMENT_OF_PROTEIN_LOCALIZATION(4)	GO:0045184	Details ...	54	0.180174	1.58086	0.0418327	0.077514	1	13188	tags=89%, list=71%, signal=305%	NA
232	LIPID_STORAGE(4)	LIPID_STORAGE(4)	GO:0019915	Details ...	440	0.066213	1.56681	0.04158	0.0814898	1	13251	tags=78%, list=71%, signal=264%	NA
233	POSITIVE_REGULATION_OF_ORGANELLE_ORGANIZATION(4)	POSITIVE_REGULATION_OF_ORGANELLE_ORGANIZATION(4)	GO:0010638	Details ...	18	0.301743	1.55625	0.0444874	0.0843819	1	10923	tags=89%, list=59%, signal=215%	NA
			#N/A
Negative NES	NAME	GS<br> follow link to MSigDB	#N/A	GS DETAILS	SIZE	ES	NES	NOM p-val	FDR q-val	FWER p-val	RANK AT MAX	LEADING EDGE	NA
1	SINGLE_ORGANISM_BEHAVIOR(3)	SINGLE_ORGANISM_BEHAVIOR(3)	GO:0044708	Details ...	77	-0.439218	-4.63104	0	0	0	6116	tags=77%, list=33%, signal=114%	NA
2	CELL_PROJECTION_MORPHOGENESIS(5)	CELL_PROJECTION_MORPHOGENESIS(5)	GO:0048858	Details ...	126	-0.340044	-4.57625	0	0	0	7446	tags=74%, list=40%, signal=122%	NA
3	CELL_MORPHOGENESIS(5)	CELL_MORPHOGENESIS(5)	GO:0000902	Details ...	141	-0.325518	-4.57136	0	0	0	7446	tags=72%, list=40%, signal=120%	NA
4	NERVOUS_SYSTEM_DEVELOPMENT(5)	NERVOUS_SYSTEM_DEVELOPMENT(5)	GO:0007399	Details ...	231	-0.252373	-4.52758	0	0	0	7361	tags=65%, list=40%, signal=105%	GO:0007399
5	RESPONSE_TO_EXTERNAL_STIMULUS(3)	RESPONSE_TO_EXTERNAL_STIMULUS(3)	GO:0009605	Details ...	261	-0.242735	-4.49252	0	0	0	10584	tags=81%, list=57%, signal=185%	GO:0009605
6	SINGLE_ORGANISM_SIGNALING(3)	SINGLE_ORGANISM_SIGNALING(3)	GO:0044700	Details ...	423	-0.183602	-4.29939	0	0	0	11084	tags=78%, list=60%, signal=188%	NA
7	CELL_COMMUNICATION(4)	CELL_COMMUNICATION(4)	GO:0007154	Details ...	440	-0.181205	-4.28491	0	0	0	11292	tags=78%, list=61%, signal=195%	NA
8	CELL_PART_MORPHOGENESIS(5)	CELL_PART_MORPHOGENESIS(5)	GO:0032990	Details ...	130	-0.324994	-4.27643	0	0	0	7446	tags=72%, list=40%, signal=120%	NA
9	TRANSCRIPTION_FROM_RNA_POLYMERASE_II_PROMOTER(7)	TRANSCRIPTION_FROM_RNA_POLYMERASE_II_PROMOTER(7)	GO:0006366	Details ...	162	-0.286518	-4.26848	0	0	0	10216	tags=83%, list=55%, signal=183%	NA
10	SIGNALING(2)	SIGNALING(2)	GO:0023052	Details ...	425	-0.179888	-4.26593	0	0	0	11084	tags=77%, list=60%, signal=187%	NA
11	TRANSCRIPTION_DNA_TEMPLATED(6)	TRANSCRIPTION_DNA_TEMPLATED(6)	GO:0006351	Details ...	199	-0.253428	-4.20025	0	0	0	9823	tags=78%, list=53%, signal=163%	NA
12	RNA_BIOSYNTHETIC_PROCESS(6)	RNA_BIOSYNTHETIC_PROCESS(6)	GO:0032774	Details ...	203	-0.248866	-4.19789	0	0	0	10905	tags=83%, list=59%, signal=199%	NA
13	REGULATION_OF_TRANSCRIPTION_FROM_RNA_POLYMERASE_II_PROMOTER(7)	REGULATION_OF_TRANSCRIPTION_FROM_RNA_POLYMERASE_II_PROMOTER(7)	GO:0006357	Details ...	156	-0.286424	-4.19158	0	0	0	10216	tags=83%, list=55%, signal=183%	GO:0006357
14	REGULATION_OF_RNA_BIOSYNTHETIC_PROCESS(6)	REGULATION_OF_RNA_BIOSYNTHETIC_PROCESS(6)	GO:2001141	Details ...	192	-0.260975	-4.16424	0	0	0	9823	tags=79%, list=53%, signal=165%	NA
15	REGULATION_OF_RNA_METABOLIC_PROCESS(5)	REGULATION_OF_RNA_METABOLIC_PROCESS(5)	GO:0051252	Details ...	201	-0.255067	-4.13753	0	0	0	11037	tags=85%, list=59%, signal=206%	GO:0051252
16	NUCLEIC_ACID_TEMPLATED_TRANSCRIPTION(7)	NUCLEIC_ACID_TEMPLATED_TRANSCRIPTION(7)	GO:0097659	Details ...	202	-0.248015	-4.12082	0	0	0	10905	tags=83%, list=59%, signal=199%	NA
17	CELL_SURFACE_RECEPTOR_SIGNALING_PATHWAY(5)	CELL_SURFACE_RECEPTOR_SIGNALING_PATHWAY(5)	GO:0007166	Details ...	168	-0.273687	-4.08235	0	0	0	11229	tags=88%, list=60%, signal=219%	NA
18	TAXIS(3)	TAXIS(3)	GO:0042330	Details ...	119	-0.316769	-4.06598	0	0	0	8056	tags=75%, list=43%, signal=131%	NA
19	REGULATION_OF_TRANSCRIPTION_DNA_TEMPLATED(6)&REGULATION_OF_NUCLEIC_ACID_TEMPLATED_TRANSCRIPTION(7)	REGULATION_OF_TRANSCRIPTION_DNA_TEMPLATED(6)&REGULATION_OF_NUCLEIC_ACID_TEMPLATED_TRANSCRIPTION(7)	GO:0006355	Details ...	190	-0.258675	-4.06197	0	0	0	9823	tags=78%, list=53%, signal=165%	GO:0006355
20	GENERATION_OF_NEURONS(7)	GENERATION_OF_NEURONS(7)	GO:0048699	Details ...	213	-0.236027	-4.04844	0	0	0	7361	tags=63%, list=40%, signal=103%	NA
21	ORGANIC_CYCLIC_COMPOUND_BIOSYNTHETIC_PROCESS(5)	ORGANIC_CYCLIC_COMPOUND_BIOSYNTHETIC_PROCESS(5)	GO:1901362	Details ...	239	-0.219114	-4.03137	0	0	0	11229	tags=82%, list=60%, signal=204%	NA
22	NUCLEOBASE_CONTAINING_COMPOUND_BIOSYNTHETIC_PROCESS(5)	NUCLEOBASE_CONTAINING_COMPOUND_BIOSYNTHETIC_PROCESS(5)	GO:0034654	Details ...	225	-0.23011	-4.02797	0	0	0	11229	tags=83%, list=60%, signal=207%	NA
23	NEURON_DIFFERENTIATION(6)	NEURON_DIFFERENTIATION(6)	GO:0030182	Details ...	195	-0.248883	-4.02335	0	0	0	6865	tags=62%, list=37%, signal=97%	GO:0030182
24	NEUROGENESIS(6)	NEUROGENESIS(6)	GO:0022008	Details ...	214	-0.237794	-3.99069	0	0	0	7361	tags=63%, list=40%, signal=103%	NA
25	HETEROCYCLE_BIOSYNTHETIC_PROCESS(5)	HETEROCYCLE_BIOSYNTHETIC_PROCESS(5)	GO:0018130	Details ...	231	-0.225968	-3.94058	0	0	0	10905	tags=81%, list=59%, signal=193%	NA
26	AROMATIC_COMPOUND_BIOSYNTHETIC_PROCESS(5)	AROMATIC_COMPOUND_BIOSYNTHETIC_PROCESS(5)	GO:0019438	Details ...	233	-0.223043	-3.87653	0	0	0	11229	tags=82%, list=60%, signal=205%	NA
27	BEHAVIOR(2)	BEHAVIOR(2)	GO:0007610	Details ...	487	-0.151203	-3.857	0	0	0	10513	tags=71%, list=57%, signal=160%	NA
28	CELL_PROJECTION_ORGANIZATION(4)	CELL_PROJECTION_ORGANIZATION(4)	GO:0030030	Details ...	207	-0.230227	-3.81872	0	0	0	7446	tags=63%, list=40%, signal=104%	NA
29	SYNAPTIC_TRANSMISSION(3)	SYNAPTIC_TRANSMISSION(3)	GO:0007268	Details ...	86	-0.347299	-3.78597	0	0	0	8925	tags=83%, list=48%, signal=158%	NA
30	REGULATION_OF_NEUROGENESIS(6)&REGULATION_OF_NEURON_DIFFERENTIATION(7)	REGULATION_OF_NEUROGENESIS(6)&REGULATION_OF_NEURON_DIFFERENTIATION(7)	GO:0050767	Details ...	34	-0.542088	-3.779	0	0	0	6347	tags=88%, list=34%, signal=134%	GO:0050767
31	CELLULAR_NITROGEN_COMPOUND_BIOSYNTHETIC_PROCESS(5)	CELLULAR_NITROGEN_COMPOUND_BIOSYNTHETIC_PROCESS(5)	GO:0044271	Details ...	236	-0.208658	-3.76524	0	0	0	10905	tags=79%, list=59%, signal=189%	NA
32	CELLULAR_COMPONENT_MORPHOGENESIS(4)	CELLULAR_COMPONENT_MORPHOGENESIS(4)	GO:0032989	Details ...	286	-0.18621	-3.68881	0	0	0	10571	tags=75%, list=57%, signal=172%	NA
33	CHEMOTAXIS(4)	CHEMOTAXIS(4)	GO:0006935	Details ...	112	-0.301177	-3.66794	0	0	0	8215	tags=74%, list=44%, signal=132%	NA
34	CELL_MORPHOGENESIS_INVOLVED_IN_NEURON_DIFFERENTIATION(6)	CELL_MORPHOGENESIS_INVOLVED_IN_NEURON_DIFFERENTIATION(6)	GO:0048667	Details ...	93	-0.315741	-3.65653	0	0	0	7356	tags=71%, list=40%, signal=117%	NA
35	SIGNAL_TRANSDUCTION(4)	SIGNAL_TRANSDUCTION(4)	GO:0007165	Details ...	340	-0.172336	-3.60985	0	0	0	11130	tags=77%, list=60%, signal=188%	NA
36	CELL_MORPHOGENESIS_INVOLVED_IN_DIFFERENTIATION(5)	CELL_MORPHOGENESIS_INVOLVED_IN_DIFFERENTIATION(5)	GO:0000904	Details ...	94	-0.318863	-3.60247	0	0	0	7356	tags=71%, list=40%, signal=117%	NA
37	REGULATION_OF_NERVOUS_SYSTEM_DEVELOPMENT(5)	REGULATION_OF_NERVOUS_SYSTEM_DEVELOPMENT(5)	GO:0051960	Details ...	35	-0.51686	-3.60016	0	0	0	6347	tags=86%, list=34%, signal=130%	GO:0051960
38	POSITIVE_REGULATION_OF_TRANSCRIPTION_FROM_RNA_POLYMERASE_II_PROMOTER(7)	POSITIVE_REGULATION_OF_TRANSCRIPTION_FROM_RNA_POLYMERASE_II_PROMOTER(7)	GO:0045944	Details ...	93	-0.312995	-3.59301	0	0	0	11206	tags=91%, list=60%, signal=229%	GO:0045944
39	NEURON_PROJECTION_MORPHOGENESIS(6)	NEURON_PROJECTION_MORPHOGENESIS(6)	GO:0048812	Details ...	96	-0.314441	-3.57641	0	0	0	7356	tags=71%, list=40%, signal=117%	NA
40	AXONOGENESIS(7)	AXONOGENESIS(7)	GO:0007409	Details ...	90	-0.317131	-3.51603	0	0	0	7356	tags=71%, list=40%, signal=117%	NA
41	ION_TRANSPORT(4)	ION_TRANSPORT(4)	GO:0006811	Details ...	121	-0.276313	-3.51032	0	0	0	7191	tags=66%, list=39%, signal=107%	NA
42	REGULATION_OF_NITROGEN_COMPOUND_METABOLIC_PROCESS(4)&REGULATION_OF_NUCLEOBASE_CONTAINING_COMPOUND_METABOLIC_PROCESS(5)	REGULATION_OF_NITROGEN_COMPOUND_METABOLIC_PROCESS(4)&REGULATION_OF_NUCLEOBASE_CONTAINING_COMPOUND_METABOLIC_PROCESS(5)	GO:0051171	Details ...	217	-0.204224	-3.49299	0	0	0	10216	tags=75%, list=55%, signal=165%	GO:0051171
43	G_PROTEIN_COUPLED_RECEPTOR_SIGNALING_PATHWAY(6)	G_PROTEIN_COUPLED_RECEPTOR_SIGNALING_PATHWAY(6)	GO:0007186	Details ...	50	-0.421244	-3.49198	0	0	0	8925	tags=90%, list=48%, signal=173%	NA
44	CELL_CELL_SIGNALING(4)	CELL_CELL_SIGNALING(4)	GO:0007267	Details ...	106	-0.285892	-3.46985	0	0	0	8925	tags=76%, list=48%, signal=146%	NA
45	POSITIVE_REGULATION_OF_TRANSCRIPTION_DNA_TEMPLATED(6)&POSITIVE_REGULATION_OF_RNA_BIOSYNTHETIC_PROCESS(6)&POSITIVE_REGULATION_OF_NUCLEIC_ACID_TEMPLATED_TRANSCRIPTION(7)	POSITIVE_REGULATION_OF_TRANSCRIPTION_DNA_TEMPLATED(6)&POSITIVE_REGULATION_OF_RNA_BIOSYNTHETIC_PROCESS(6)&POSITIVE_REGULATION_OF_NUCLEIC_ACID_TEMPLATED_TRANSCRIPTION(7)	GO:0045893	Details ...	97	-0.306265	-3.46082	0	0	0	11206	tags=91%, list=60%, signal=227%	GO:0045893
46	REGULATION_OF_CELL_DEVELOPMENT(5)	REGULATION_OF_CELL_DEVELOPMENT(5)	GO:0060284	Details ...	43	-0.439297	-3.45567	0	0	0	6987	tags=81%, list=38%, signal=130%	GO:0060284
47	REGULATION_OF_MACROMOLECULE_BIOSYNTHETIC_PROCESS(5)	REGULATION_OF_MACROMOLECULE_BIOSYNTHETIC_PROCESS(5)	GO:0010556	Details ...	222	-0.197891	-3.43363	0	0	0	9935	tags=73%, list=53%, signal=155%	GO:0010556
48	POSITIVE_REGULATION_OF_MACROMOLECULE_BIOSYNTHETIC_PROCESS(5)	POSITIVE_REGULATION_OF_MACROMOLECULE_BIOSYNTHETIC_PROCESS(5)	GO:0010557	Details ...	104	-0.283653	-3.4116	0	0	0	11206	tags=88%, list=60%, signal=221%	GO:0010557
49	REGULATION_OF_CELLULAR_MACROMOLECULE_BIOSYNTHETIC_PROCESS(6)	REGULATION_OF_CELLULAR_MACROMOLECULE_BIOSYNTHETIC_PROCESS(6)	GO:2000112	Details ...	220	-0.195383	-3.3771	0	0	0	9935	tags=73%, list=53%, signal=154%	GO:2000112
50	REGULATION_OF_BIOSYNTHETIC_PROCESS(4)&REGULATION_OF_CELLULAR_BIOSYNTHETIC_PROCESS(5)	REGULATION_OF_BIOSYNTHETIC_PROCESS(4)&REGULATION_OF_CELLULAR_BIOSYNTHETIC_PROCESS(5)	GO:0009889	Details ...	225	-0.197072	-3.35607	0	0	0	9935	tags=73%, list=53%, signal=155%	GO:0009889
51	EMBRYONIC_MORPHOGENESIS(4)	EMBRYONIC_MORPHOGENESIS(4)	GO:0048598	Details ...	138	-0.243903	-3.34681	0	0	0	12478	tags=91%, list=67%, signal=275%	NA
52	POSITIVE_REGULATION_OF_GENE_EXPRESSION(5)	POSITIVE_REGULATION_OF_GENE_EXPRESSION(5)	GO:0010628	Details ...	107	-0.277553	-3.33566	0	0	0	11206	tags=88%, list=60%, signal=220%	GO:0010628
53	POSITIVE_REGULATION_OF_BIOSYNTHETIC_PROCESS(4)&POSITIVE_REGULATION_OF_CELLULAR_BIOSYNTHETIC_PROCESS(5)	POSITIVE_REGULATION_OF_BIOSYNTHETIC_PROCESS(4)&POSITIVE_REGULATION_OF_CELLULAR_BIOSYNTHETIC_PROCESS(5)	GO:0009891	Details ...	106	-0.276385	-3.33179	0	0	0	11206	tags=88%, list=60%, signal=220%	GO:0009891
54	POSITIVE_REGULATION_OF_RNA_METABOLIC_PROCESS(5)	POSITIVE_REGULATION_OF_RNA_METABOLIC_PROCESS(5)	GO:0051254	Details ...	98	-0.296975	-3.3314	0	0	0	11206	tags=90%, list=60%, signal=225%	GO:0051254
55	NEURON_PROJECTION_DEVELOPMENT(5)	NEURON_PROJECTION_DEVELOPMENT(5)	GO:0031175	Details ...	166	-0.220942	-3.31705	0	0	0	9708	tags=74%, list=52%, signal=154%	NA
56	NEURON_DEVELOPMENT(5)	NEURON_DEVELOPMENT(5)	GO:0048666	Details ...	178	-0.216029	-3.3116	0	0	0	9708	tags=74%, list=52%, signal=153%	NA
57	CILIUM_MORPHOGENESIS(6)	CILIUM_MORPHOGENESIS(6)	GO:0060271	Details ...	29	-0.501619	-3.28075	0	0	0	5436	tags=79%, list=29%, signal=112%	NA
58	MALE_SEX_DIFFERENTIATION(5)	MALE_SEX_DIFFERENTIATION(5)	GO:0046661	Details ...	86	-0.295547	-3.27801	0	0	0	9018	tags=78%, list=48%, signal=151%	NA
59	MOVEMENT_OF_CELL_OR_SUBCELLULAR_COMPONENT(4)	MOVEMENT_OF_CELL_OR_SUBCELLULAR_COMPONENT(4)	GO:0006928	Details ...	365	-0.148912	-3.25764	0	0	0	13131	tags=85%, list=71%, signal=284%	GO:0006928
60	SINGLE_ORGANISM_TRANSPORT(3)	SINGLE_ORGANISM_TRANSPORT(3)	GO:0044765	Details ...	456	-0.132144	-3.23723	0	0	0	14324	tags=90%, list=77%, signal=382%	NA
61	CHEMOSENSORY_BEHAVIOR(4)	CHEMOSENSORY_BEHAVIOR(4)	GO:0007635	Details ...	28	-0.52382	-3.23229	0	0	0	5550	tags=82%, list=30%, signal=117%	NA
62	CELL_MIGRATION(4)	CELL_MIGRATION(4)	GO:0016477	Details ...	288	-0.162826	-3.22933	0	0	0	15164	tags=98%, list=82%, signal=520%	GO:0016477
63	REGULATION_OF_RESPONSE_TO_STIMULUS(3)	REGULATION_OF_RESPONSE_TO_STIMULUS(3)	GO:0048583	Details ...	226	-0.190721	-3.22271	0	0	0	11473	tags=81%, list=62%, signal=208%	GO:0048583
64	RESPONSE_TO_MECHANICAL_STIMULUS(4)	RESPONSE_TO_MECHANICAL_STIMULUS(4)	GO:0009612	Details ...	28	-0.493337	-3.18369	0	0	0	6116	tags=82%, list=33%, signal=122%	NA
65	MALE_ANATOMICAL_STRUCTURE_MORPHOGENESIS(4)	MALE_ANATOMICAL_STRUCTURE_MORPHOGENESIS(4)	GO:0090598	Details ...	78	-0.298414	-3.13317	0	0	0	9018	tags=78%, list=48%, signal=151%	NA
66	REGULATION_OF_LOCOMOTION(3)	REGULATION_OF_LOCOMOTION(3)	GO:0040012	Details ...	154	-0.214924	-3.12445	0	0	0	10407	tags=77%, list=56%, signal=174%	GO:0040012
67	POSITIVE_REGULATION_OF_NITROGEN_COMPOUND_METABOLIC_PROCESS(4)&POSITIVE_REGULATION_OF_NUCLEOBASE_CONTAINING_COMPOUND_METABOLIC_PROCESS(5)	POSITIVE_REGULATION_OF_NITROGEN_COMPOUND_METABOLIC_PROCESS(4)&POSITIVE_REGULATION_OF_NUCLEOBASE_CONTAINING_COMPOUND_METABOLIC_PROCESS(5)	GO:0051173	Details ...	103	-0.262985	-3.12104	0	0	0	11206	tags=86%, list=60%, signal=216%	GO:0051173
68	POSITIVE_REGULATION_OF_METABOLIC_PROCESS(3)	POSITIVE_REGULATION_OF_METABOLIC_PROCESS(3)	GO:0009893	Details ...	169	-0.200845	-3.10159	0	0	0	11705	tags=83%, list=63%, signal=222%	GO:0009893
69	SYSTEM_PROCESS(4)	SYSTEM_PROCESS(4)	GO:0003008	Details ...	124	-0.243511	-3.09234	0	0	0	8850	tags=72%, list=48%, signal=136%	NA
70	REGULATION_OF_CELL_COMMUNICATION(4)	REGULATION_OF_CELL_COMMUNICATION(4)	GO:0010646	Details ...	168	-0.203469	-3.07899	0	0	0	11084	tags=80%, list=60%, signal=196%	NA
71	CELL_FATE_SPECIFICATION(5)	CELL_FATE_SPECIFICATION(5)	GO:0001708	Details ...	107	-0.248109	-3.05282	0	0	0	11229	tags=85%, list=60%, signal=213%	GO:0001708
72	CILIUM_ORGANIZATION(5)	CILIUM_ORGANIZATION(5)	GO:0044782	Details ...	29	-0.484868	-3.03759	0	0	0	5747	tags=79%, list=31%, signal=115%	NA
73	NEMATODE_MALE_TAIL_TIP_MORPHOGENESIS(5)	NEMATODE_MALE_TAIL_TIP_MORPHOGENESIS(5)	GO:0045138	Details ...	77	-0.295555	-3.01048	0	0	0	9018	tags=78%, list=48%, signal=151%	GO:0045138
74	POSITIVE_REGULATION_OF_MACROMOLECULE_METABOLIC_PROCESS(4)	POSITIVE_REGULATION_OF_MACROMOLECULE_METABOLIC_PROCESS(4)	GO:0010604	Details ...	144	-0.220748	-3.0053	0	0	0	11037	tags=81%, list=59%, signal=198%	GO:0010604
75	NONMOTILE_PRIMARY_CILIUM_ASSEMBLY(6)	NONMOTILE_PRIMARY_CILIUM_ASSEMBLY(6)	GO:0035058	Details ...	15	-0.641584	-2.99393	0	0	0	5436	tags=93%, list=29%, signal=132%	NA
76	NEURON_PROJECTION_GUIDANCE(5)&AXON_GUIDANCE(6)	NEURON_PROJECTION_GUIDANCE(5)&AXON_GUIDANCE(6)	GO:0097485	Details ...	75	-0.292806	-2.992	0	0	0	8215	tags=73%, list=44%, signal=131%	NA
77	OLFACTORY_BEHAVIOR(5)	OLFACTORY_BEHAVIOR(5)	GO:0042048	Details ...	22	-0.5204	-2.9894	0	0	0	5550	tags=82%, list=30%, signal=116%	NA
78	RNA_METABOLIC_PROCESS(5)	RNA_METABOLIC_PROCESS(5)	GO:0016070	Details ...	291	-0.148249	-2.96116	0	0	0	14094	tags=90%, list=76%, signal=367%	NA
79	REGULATION_OF_NEURON_PROJECTION_DEVELOPMENT(5)	REGULATION_OF_NEURON_PROJECTION_DEVELOPMENT(5)	GO:0010975	Details ...	25	-0.499415	-2.95565	0	0	0	6347	tags=84%, list=34%, signal=127%	NA
80	CELL_MOTILITY(3)&LOCALIZATION_OF_CELL(3)	CELL_MOTILITY(3)&LOCALIZATION_OF_CELL(3)	GO:0048870	Details ...	296	-0.146399	-2.94461	0	0	0	15164	tags=96%, list=82%, signal=512%	GO:0048870
81	SYNAPTIC_TRANSMISSION_CHOLINERGIC(4)	SYNAPTIC_TRANSMISSION_CHOLINERGIC(4)	GO:0007271	Details ...	30	-0.454178	-2.94361	0	0	0	8925	tags=93%, list=48%, signal=179%	NA
82	CILIUM_ASSEMBLY(5)	CILIUM_ASSEMBLY(5)	GO:0042384	Details ...	24	-0.500045	-2.91899	0	0	0	5436	tags=79%, list=29%, signal=112%	NA
83	REGULATION_OF_PRIMARY_METABOLIC_PROCESS(4)	REGULATION_OF_PRIMARY_METABOLIC_PROCESS(4)	GO:0080090	Details ...	306	-0.140883	-2.91562	0	0	0	11037	tags=73%, list=59%, signal=177%	GO:0080090
84	REGULATION_OF_SIGNALING(3)	REGULATION_OF_SIGNALING(3)	GO:0023051	Details ...	164	-0.193898	-2.90793	0	0	0	13549	tags=92%, list=73%, signal=336%	NA
85	POSITIVE_REGULATION_OF_CELLULAR_METABOLIC_PROCESS(4)	POSITIVE_REGULATION_OF_CELLULAR_METABOLIC_PROCESS(4)	GO:0031325	Details ...	146	-0.202651	-2.90656	0	1.34e-05	0.001	11037	tags=79%, list=59%, signal=194%	GO:0031325
86	MESODERM_FORMATION(5)&MESODERM_MORPHOGENESIS(5)&MESODERMAL_CELL_DIFFERENTIATION(6)	MESODERM_FORMATION(5)&MESODERM_MORPHOGENESIS(5)&MESODERMAL_CELL_DIFFERENTIATION(6)	GO:0001707	Details ...	15	-0.621387	-2.89807	0	2.71e-05	0.002	7051	tags=100%, list=38%, signal=161%	NA
87	PROTEIN_METABOLIC_PROCESS(4)	PROTEIN_METABOLIC_PROCESS(4)	GO:0019538	Details ...	469	-0.116185	-2.89046	0	2.68e-05	0.002	15460	tags=94%, list=83%, signal=546%	NA
88	CATABOLIC_PROCESS(3)	CATABOLIC_PROCESS(3)	GO:0009056	Details ...	269	-0.150109	-2.88804	0	2.65e-05	0.002	14809	tags=94%, list=80%, signal=457%	NA
89	AXON_DEVELOPMENT(6)	AXON_DEVELOPMENT(6)	GO:0061564	Details ...	144	-0.20656	-2.88696	0	2.62e-05	0.002	9620	tags=72%, list=52%, signal=148%	NA
90	INORGANIC_ANION_TRANSPORT(6)	INORGANIC_ANION_TRANSPORT(6)	GO:0015698	Details ...	30	-0.45226	-2.87597	0	3.88e-05	0.003	7101	tags=83%, list=38%, signal=135%	NA
91	ION_TRANSMEMBRANE_TRANSPORT(5)	ION_TRANSMEMBRANE_TRANSPORT(5)	GO:0034220	Details ...	74	-0.278931	-2.87471	0	3.84e-05	0.003	8656	tags=74%, list=47%, signal=138%	NA
92	LOCOMOTORY_BEHAVIOR(3)	LOCOMOTORY_BEHAVIOR(3)	GO:0007626	Details ...	36	-0.39563	-2.85866	0	3.8e-05	0.003	5572	tags=69%, list=30%, signal=99%	NA
93	CYTOSKELETON_DEPENDENT_INTRACELLULAR_TRANSPORT(5)&MICROTUBULE_BASED_TRANSPORT(6)	CYTOSKELETON_DEPENDENT_INTRACELLULAR_TRANSPORT(5)&MICROTUBULE_BASED_TRANSPORT(6)	GO:0030705	Details ...	18	-0.558827	-2.84589	0	3.76e-05	0.003	7182	tags=94%, list=39%, signal=154%	NA
94	REGULATION_OF_MULTICELLULAR_ORGANISMAL_DEVELOPMENT(4)	REGULATION_OF_MULTICELLULAR_ORGANISMAL_DEVELOPMENT(4)	GO:2000026	Details ...	289	-0.141054	-2.82237	0	6.1e-05	0.005	14020	tags=89%, list=75%, signal=357%	GO:2000026
95	NEUROLOGICAL_SYSTEM_PROCESS(5)	NEUROLOGICAL_SYSTEM_PROCESS(5)	GO:0050877	Details ...	47	-0.342395	-2.82186	0	6.04e-05	0.005	7498	tags=74%, list=40%, signal=124%	NA
96	REGULATION_OF_SYNAPTIC_TRANSMISSION(3)	REGULATION_OF_SYNAPTIC_TRANSMISSION(3)	GO:0050804	Details ...	33	-0.406798	-2.79332	0	7.12e-05	0.006	7101	tags=79%, list=38%, signal=127%	GO:0050804
97	MESODERMAL_CELL_FATE_COMMITMENT(6)	MESODERMAL_CELL_FATE_COMMITMENT(6)	GO:0001710	Details ...	14	-0.621354	-2.79134	0	7.05e-05	0.006	7051	tags=100%, list=38%, signal=161%	NA
98	TRANSMEMBRANE_TRANSPORT(4)	TRANSMEMBRANE_TRANSPORT(4)	GO:0055085	Details ...	101	-0.236479	-2.78198	0	8.1e-05	0.007	9068	tags=72%, list=49%, signal=140%	NA
99	REGULATION_OF_CELLULAR_METABOLIC_PROCESS(4)	REGULATION_OF_CELLULAR_METABOLIC_PROCESS(4)	GO:0031323	Details ...	315	-0.139053	-2.78097	0	9.17e-05	0.008	11037	tags=73%, list=59%, signal=177%	GO:0031323
100	CELL_FATE_COMMITMENT(5)	CELL_FATE_COMMITMENT(5)	GO:0045165	Details ...	138	-0.202062	-2.77919	0	9.08e-05	0.008	11229	tags=80%, list=60%, signal=202%	NA
101	REGULATION_OF_CELL_MORPHOGENESIS_INVOLVED_IN_DIFFERENTIATION(5)&REGULATION_OF_AXONOGENESIS(6)	REGULATION_OF_CELL_MORPHOGENESIS_INVOLVED_IN_DIFFERENTIATION(5)&REGULATION_OF_AXONOGENESIS(6)	GO:0010769	Details ...	23	-0.485431	-2.75469	0	8.99e-05	0.008	6347	tags=83%, list=34%, signal=125%	NA
102	MESODERMAL_CELL_FATE_SPECIFICATION(6)	MESODERMAL_CELL_FATE_SPECIFICATION(6)	GO:0007501	Details ...	13	-0.621321	-2.75368	0	8.9e-05	0.008	7051	tags=100%, list=38%, signal=161%	NA
103	REGULATION_OF_ANATOMICAL_STRUCTURE_SIZE(4)	REGULATION_OF_ANATOMICAL_STRUCTURE_SIZE(4)	GO:0090066	Details ...	48	-0.331815	-2.73904	0	8.82e-05	0.008	10118	tags=88%, list=54%, signal=191%	NA
104	POSITIVE_REGULATION_OF_CELLULAR_PROCESS(3)	POSITIVE_REGULATION_OF_CELLULAR_PROCESS(3)	GO:0048522	Details ...	301	-0.13613	-2.73759	0	8.73e-05	0.008	12585	tags=81%, list=68%, signal=247%	GO:0048522
105	CELL_PROJECTION_ASSEMBLY(5)	CELL_PROJECTION_ASSEMBLY(5)	GO:0030031	Details ...	31	-0.418107	-2.73259	0	8.65e-05	0.008	5436	tags=71%, list=29%, signal=100%	NA
106	REGULATION_OF_BEHAVIOR(3)	REGULATION_OF_BEHAVIOR(3)	GO:0050795	Details ...	89	-0.252623	-2.72857	0	8.57e-05	0.008	9116	tags=74%, list=49%, signal=145%	NA
107	MECHANOSENSORY_BEHAVIOR(4)	MECHANOSENSORY_BEHAVIOR(4)	GO:0007638	Details ...	25	-0.4718	-2.72479	0	8.49e-05	0.008	6116	tags=80%, list=33%, signal=119%	NA
108	REGULATION_OF_CELL_PROJECTION_ORGANIZATION(4)	REGULATION_OF_CELL_PROJECTION_ORGANIZATION(4)	GO:0031344	Details ...	32	-0.398574	-2.68544	0	0.000115	0.011	7130	tags=78%, list=38%, signal=126%	NA
109	INTRACILIARY_TRANSPORT(6)	INTRACILIARY_TRANSPORT(6)	GO:0042073	Details ...	13	-0.614271	-2.68106	0	0.000124	0.012	7182	tags=100%, list=39%, signal=163%	NA
110	ANION_TRANSPORT(5)	ANION_TRANSPORT(5)	GO:0006820	Details ...	45	-0.33749	-2.66847	0	0.000133	0.013	10270	tags=89%, list=55%, signal=198%	NA
111	REGULATION_OF_CELL_DIFFERENTIATION(4)	REGULATION_OF_CELL_DIFFERENTIATION(4)	GO:0045595	Details ...	75	-0.259792	-2.65827	0	0.000162	0.016	6347	tags=60%, list=34%, signal=91%	GO:0045595
112	FEEDING_BEHAVIOR(3)	FEEDING_BEHAVIOR(3)	GO:0007631	Details ...	68	-0.268808	-2.65148	0	0.00016	0.016	9241	tags=76%, list=50%, signal=151%	NA
113	TISSUE_DEVELOPMENT(4)	TISSUE_DEVELOPMENT(4)	GO:0009888	Details ...	103	-0.228044	-2.64178	0	0.000169	0.017	11130	tags=83%, list=60%, signal=204%	NA
114	ENZYME_LINKED_RECEPTOR_PROTEIN_SIGNALING_PATHWAY(6)	ENZYME_LINKED_RECEPTOR_PROTEIN_SIGNALING_PATHWAY(6)	GO:0007167	Details ...	59	-0.295609	-2.63432	0	0.000206	0.021	10911	tags=88%, list=59%, signal=213%	NA
115	MESODERM_DEVELOPMENT(5)	MESODERM_DEVELOPMENT(5)	GO:0007498	Details ...	18	-0.524701	-2.63387	0	0.000205	0.021	7816	tags=94%, list=42%, signal=163%	NA
116	ORGANIC_SUBSTANCE_CATABOLIC_PROCESS(4)	ORGANIC_SUBSTANCE_CATABOLIC_PROCESS(4)	GO:1901575	Details ...	245	-0.144449	-2.61848	0	0.000261	0.027	15339	tags=97%, list=82%, signal=545%	NA
117	REGULATION_OF_CELLULAR_COMPONENT_SIZE(4)	REGULATION_OF_CELLULAR_COMPONENT_SIZE(4)	GO:0032535	Details ...	42	-0.337673	-2.61143	0	0.000258	0.027	10118	tags=88%, list=54%, signal=193%	NA
118	RESPONSE_TO_OSMOTIC_STRESS(4)	RESPONSE_TO_OSMOTIC_STRESS(4)	GO:0006970	Details ...	28	-0.418385	-2.60434	0	0.000286	0.03	8836	tags=89%, list=48%, signal=170%	NA
119	CATION_TRANSPORT(5)	CATION_TRANSPORT(5)	GO:0006812	Details ...	83	-0.246454	-2.58965	0	0.00035	0.037	7537	tags=65%, list=41%, signal=109%	NA
120	MONOVALENT_INORGANIC_CATION_TRANSPORT(6)	MONOVALENT_INORGANIC_CATION_TRANSPORT(6)	GO:0015672	Details ...	52	-0.297558	-2.57781	0	0.000394	0.042	11291	tags=90%, list=61%, signal=229%	NA
121	REGULATION_OF_SIGNAL_TRANSDUCTION(4)	REGULATION_OF_SIGNAL_TRANSDUCTION(4)	GO:0009966	Details ...	128	-0.194818	-2.5751	0	0.000409	0.044	13401	tags=91%, list=72%, signal=325%	NA
122	POSITIVE_REGULATION_OF_LOCOMOTION(3)	POSITIVE_REGULATION_OF_LOCOMOTION(3)	GO:0040017	Details ...	41	-0.340462	-2.56862	0	0.000414	0.045	6837	tags=71%, list=37%, signal=112%	GO:0040017
123	NEGATIVE_REGULATION_OF_RESPONSE_TO_STIMULUS(3)	NEGATIVE_REGULATION_OF_RESPONSE_TO_STIMULUS(3)	GO:0048585	Details ...	71	-0.259708	-2.54034	0	0.000549	0.059	10381	tags=82%, list=56%, signal=184%	NA
124	REGULATION_OF_METABOLIC_PROCESS(3)	REGULATION_OF_METABOLIC_PROCESS(3)	GO:0019222	Details ...	495	-0.0993386	-2.52913	0	0.000616	0.067	14094	tags=85%, list=76%, signal=344%	GO:0019222
125	MUSCLE_ORGAN_DEVELOPMENT(5)	MUSCLE_ORGAN_DEVELOPMENT(5)	GO:0007517	Details ...	26	-0.414544	-2.52842	0	0.00062	0.068	8038	tags=85%, list=43%, signal=149%	NA
126	CELLULAR_RESPONSE_TO_STIMULUS(3)	CELLULAR_RESPONSE_TO_STIMULUS(3)	GO:0051716	Details ...	417	-0.106613	-2.52691	0	0.000625	0.069	12244	tags=76%, list=66%, signal=218%	NA
127	REGULATION_OF_MULTI_ORGANISM_PROCESS(3)	REGULATION_OF_MULTI_ORGANISM_PROCESS(3)	GO:0043900	Details ...	65	-0.267477	-2.52464	0	0.000629	0.069	9349	tags=77%, list=50%, signal=154%	NA
128	REPRODUCTIVE_BEHAVIOR(3)&MULTI_ORGANISM_REPRODUCTIVE_BEHAVIOR(4)	REPRODUCTIVE_BEHAVIOR(3)&MULTI_ORGANISM_REPRODUCTIVE_BEHAVIOR(4)	GO:0019098	Details ...	358	-0.112868	-2.50157	0	0.000731	0.08	10513	tags=68%, list=57%, signal=153%	GO:0019098
129	MUSCLE_STRUCTURE_DEVELOPMENT(4)	MUSCLE_STRUCTURE_DEVELOPMENT(4)	GO:0061061	Details ...	181	-0.158862	-2.49979	0	0.000725	0.08	13514	tags=88%, list=73%, signal=320%	NA
130	REGULATION_OF_ANATOMICAL_STRUCTURE_MORPHOGENESIS(4)	REGULATION_OF_ANATOMICAL_STRUCTURE_MORPHOGENESIS(4)	GO:0022603	Details ...	45	-0.320753	-2.49813	0	0.000728	0.081	9754	tags=84%, list=52%, signal=177%	NA
131	SENSORY_PERCEPTION(6)	SENSORY_PERCEPTION(6)	GO:0007600	Details ...	26	-0.405108	-2.48139	0	0.000792	0.088	7498	tags=81%, list=40%, signal=135%	NA
132	REGULATION_OF_REPRODUCTIVE_PROCESS(3)	REGULATION_OF_REPRODUCTIVE_PROCESS(3)	GO:2000241	Details ...	63	-0.260097	-2.47567	0	0.00082	0.092	9349	tags=76%, list=50%, signal=153%	GO:2000241
133	DEVELOPMENTAL_CELL_GROWTH(4)	DEVELOPMENTAL_CELL_GROWTH(4)	GO:0048588	Details ...	33	-0.362169	-2.47031	0	0.000831	0.094	9620	tags=88%, list=52%, signal=182%	GO:0048588
134	LEARNING(5)	LEARNING(5)	GO:0007612	Details ...	16	-0.514545	-2.4702	0	0.000825	0.094	5550	tags=81%, list=30%, signal=116%	NA
135	PROTEIN_CATABOLIC_PROCESS(5)	PROTEIN_CATABOLIC_PROCESS(5)	GO:0030163	Details ...	164	-0.162449	-2.45839	0	0.000885	0.099	14809	tags=96%, list=80%, signal=466%	NA
136	CELLULAR_MACROMOLECULE_BIOSYNTHETIC_PROCESS(5)	CELLULAR_MACROMOLECULE_BIOSYNTHETIC_PROCESS(5)	GO:0034645	Details ...	295	-0.126268	-2.4508	0.0019685	0.000919	0.103	12630	tags=80%, list=68%, signal=246%	NA
137	GENE_EXPRESSION(5)	GENE_EXPRESSION(5)	GO:0010467	Details ...	438	-0.101383	-2.45019	0	0.000913	0.103	14888	tags=90%, list=80%, signal=441%	NA
138	REGULATION_OF_AXON_EXTENSION(5)&REGULATION_OF_EXTENT_OF_CELL_GROWTH(5)	REGULATION_OF_AXON_EXTENSION(5)&REGULATION_OF_EXTENT_OF_CELL_GROWTH(5)	GO:0030516	Details ...	20	-0.464083	-2.44903	0	0.000906	0.103	6257	tags=80%, list=34%, signal=120%	NA
139	CELLULAR_BIOSYNTHETIC_PROCESS(4)	CELLULAR_BIOSYNTHETIC_PROCESS(4)	GO:0044249	Details ...	387	-0.107434	-2.44793	0	0.0009	0.103	14094	tags=86%, list=76%, signal=349%	NA
140	MACROMOLECULE_BIOSYNTHETIC_PROCESS(5)	MACROMOLECULE_BIOSYNTHETIC_PROCESS(5)	GO:0009059	Details ...	300	-0.122857	-2.43345	0.00205761	0.000976	0.11	12630	tags=80%, list=68%, signal=245%	NA
141	EATING_BEHAVIOR(4)	EATING_BEHAVIOR(4)	GO:0042755	Details ...	56	-0.273794	-2.43179	0	0.000969	0.11	9536	tags=79%, list=51%, signal=161%	NA
142	CELL_GROWTH(3)	CELL_GROWTH(3)	GO:0016049	Details ...	39	-0.329583	-2.43138	0	0.00097	0.111	9620	tags=85%, list=52%, signal=175%	GO:0016049
143	GASTRULATION(4)	GASTRULATION(4)	GO:0007369	Details ...	49	-0.292094	-2.42643	0	0.000995	0.115	12041	tags=94%, list=65%, signal=266%	NA
144	DEVELOPMENTAL_GROWTH_INVOLVED_IN_MORPHOGENESIS(4)&NEURON_PROJECTION_EXTENSION(5)&AXON_EXTENSION(6)	DEVELOPMENTAL_GROWTH_INVOLVED_IN_MORPHOGENESIS(4)&NEURON_PROJECTION_EXTENSION(5)&AXON_EXTENSION(6)	GO:0060560	Details ...	31	-0.363165	-2.42626	0	0.000989	0.115	6456	tags=71%, list=35%, signal=109%	GO:0060560
145	HYPEROSMOTIC_RESPONSE(5)	HYPEROSMOTIC_RESPONSE(5)	GO:0006972	Details ...	18	-0.479845	-2.42192	0.00203252	0.00101312	0.119	5550	tags=78%, list=30%, signal=111%	NA
146	ANATOMICAL_STRUCTURE_FORMATION_INVOLVED_IN_MORPHOGENESIS(3)	ANATOMICAL_STRUCTURE_FORMATION_INVOLVED_IN_MORPHOGENESIS(3)	GO:0048646	Details ...	224	-0.14111	-2.41505	0	0.00108296	0.129	13514	tags=87%, list=73%, signal=313%	GO:0048646
147	CHLORIDE_TRANSPORT(7)	CHLORIDE_TRANSPORT(7)	GO:0006821	Details ...	10	-0.61853	-2.40861	0	0.00112125	0.135	7101	tags=100%, list=38%, signal=162%	NA
148	MACROMOLECULE_CATABOLIC_PROCESS(5)	MACROMOLECULE_CATABOLIC_PROCESS(5)	GO:0009057	Details ...	207	-0.147369	-2.40829	0	0.00111367	0.135	14809	tags=94%, list=80%, signal=457%	NA
149	MULTI_ORGANISM_BEHAVIOR(3)	MULTI_ORGANISM_BEHAVIOR(3)	GO:0051705	Details ...	360	-0.111883	-2.40777	0	0.00111367	0.136	10513	tags=68%, list=57%, signal=152%	NA
150	NEGATIVE_REGULATION_OF_RNA_METABOLIC_PROCESS(5)&NEGATIVE_REGULATION_OF_TRANSCRIPTION_DNA_TEMPLATED(6)&NEGATIVE_REGULATION_OF_RNA_BIOSYNTHETIC_PROCESS(6)&NEGATIVE_REGULATION_OF_NUCLEIC_ACID_TEMPLATED_TRANSCRIPTION(7)	NEGATIVE_REGULATION_OF_RNA_METABOLIC_PROCESS(5)&NEGATIVE_REGULATION_OF_TRANSCRIPTION_DNA_TEMPLATED(6)&NEGATIVE_REGULATION_OF_RNA_BIOSYNTHETIC_PROCESS(6)&NEGATIVE_REGULATION_OF_NUCLEIC_ACID_TEMPLATED_TRANSCRIPTION(7)	GO:0051253	Details ...	60	-0.260934	-2.4065	0.00208768	0.00112841	0.139	6012	tags=58%, list=32%, signal=86%	GO:0051253
151	DAUER_LARVAL_DEVELOPMENT(7)	DAUER_LARVAL_DEVELOPMENT(7)	GO:0040024	Details ...	90	-0.219471	-2.39599	0	0.00119591	0.149	12056	tags=87%, list=65%, signal=245%	NA
152	RESPONSE_TO_ABIOTIC_STIMULUS(3)	RESPONSE_TO_ABIOTIC_STIMULUS(3)	GO:0009628	Details ...	145	-0.171282	-2.39338	0	0.0012102	0.152	10435	tags=73%, list=56%, signal=165%	NA
153	REGULATION_OF_MACROMOLECULE_METABOLIC_PROCESS(4)	REGULATION_OF_MACROMOLECULE_METABOLIC_PROCESS(4)	GO:0060255	Details ...	449	-0.0985432	-2.37877	0.00201613	0.0012829	0.162	13951	tags=85%, list=75%, signal=331%	GO:0060255
154	MULTICELLULAR_ORGANISMAL_REPRODUCTIVE_BEHAVIOR(4)	MULTICELLULAR_ORGANISMAL_REPRODUCTIVE_BEHAVIOR(4)	GO:0033057	Details ...	355	-0.110058	-2.37774	0	0.00127457	0.162	10513	tags=67%, list=57%, signal=152%	NA
155	REGULATION_OF_CELL_SIZE(5)	REGULATION_OF_CELL_SIZE(5)	GO:0008361	Details ...	30	-0.356533	-2.36748	0	0.0013159	0.165	10118	tags=90%, list=54%, signal=197%	NA
156	SYNAPSE_ORGANIZATION(4)	SYNAPSE_ORGANIZATION(4)	GO:0050808	Details ...	25	-0.391326	-2.3662	0	0.00130746	0.165	9842	tags=92%, list=53%, signal=195%	GO:0050808
157	REGULATION_OF_CELL_MORPHOGENESIS(4)	REGULATION_OF_CELL_MORPHOGENESIS(4)	GO:0022604	Details ...	34	-0.339489	-2.36501	0	0.00132081	0.167	6826	tags=71%, list=37%, signal=111%	NA
158	ORGANELLE_ASSEMBLY(4)	ORGANELLE_ASSEMBLY(4)	GO:0070925	Details ...	200	-0.144663	-2.36254	0	0.001342	0.17	14913	tags=95%, list=80%, signal=472%	NA
159	DETECTION_OF_STIMULUS(3)	DETECTION_OF_STIMULUS(3)	GO:0051606	Details ...	10	-0.618907	-2.3501	0	0.00148127	0.19	7094	tags=100%, list=38%, signal=162%	NA
160	MUSCLE_SYSTEM_PROCESS(5)&MUSCLE_CONTRACTION(6)	MUSCLE_SYSTEM_PROCESS(5)&MUSCLE_CONTRACTION(6)	GO:0003012	Details ...	39	-0.320707	-2.35004	0	0.00147878	0.191	11692	tags=95%, list=63%, signal=255%	NA
161	EMBRYONIC_BODY_MORPHOGENESIS(5)	EMBRYONIC_BODY_MORPHOGENESIS(5)	GO:0010172	Details ...	46	-0.291248	-2.34953	0	0.00149084	0.193	9556	tags=80%, list=51%, signal=165%	NA
162	MESODERMAL_CELL_MIGRATION(6)	MESODERMAL_CELL_MIGRATION(6)	GO:0008078	Details ...	10	-0.60481	-2.34772	0.00187617	0.00148837	0.193	7356	tags=100%, list=40%, signal=165%	NA
163	REGULATION_OF_GENE_EXPRESSION(5)	REGULATION_OF_GENE_EXPRESSION(5)	GO:0010468	Details ...	375	-0.10289	-2.34115	0	0.00155633	0.199	14094	tags=86%, list=76%, signal=348%	GO:0010468
164	LEARNING_OR_MEMORY(4)&COGNITION(6)	LEARNING_OR_MEMORY(4)&COGNITION(6)	GO:0007611	Details ...	22	-0.416354	-2.33615	0.0019802	0.00161574	0.209	5792	tags=73%, list=31%, signal=106%	NA
165	ORGANIC_SUBSTANCE_BIOSYNTHETIC_PROCESS(4)	ORGANIC_SUBSTANCE_BIOSYNTHETIC_PROCESS(4)	GO:1901576	Details ...	394	-0.102259	-2.33425	0.00195312	0.00162654	0.212	13951	tags=85%, list=75%, signal=333%	GO:1901576
166	RESPONSE_TO_CHEMICAL(3)	RESPONSE_TO_CHEMICAL(3)	GO:0042221	Details ...	321	-0.11338	-2.33162	0.00193424	0.00165691	0.217	13976	tags=86%, list=75%, signal=341%	NA
167	REGULATION_OF_CELL_GROWTH(4)	REGULATION_OF_CELL_GROWTH(4)	GO:0001558	Details ...	23	-0.401171	-2.32594	0	0.00173506	0.229	9529	tags=91%, list=51%, signal=187%	NA
168	POSITIVE_REGULATION_OF_DEVELOPMENTAL_PROCESS(3)	POSITIVE_REGULATION_OF_DEVELOPMENTAL_PROCESS(3)	GO:0051094	Details ...	380	-0.102212	-2.3221	0	0.00180065	0.238	15267	tags=92%, list=82%, signal=504%	GO:0051094
169	PHARYNGEAL_PUMPING(5)	PHARYNGEAL_PUMPING(5)	GO:0043050	Details ...	55	-0.269872	-2.32176	0	0.00180331	0.239	9536	tags=78%, list=51%, signal=160%	NA
170	NEGATIVE_REGULATION_OF_TRANSCRIPTION_FROM_RNA_POLYMERASE_II_PROMOTER(7)	NEGATIVE_REGULATION_OF_TRANSCRIPTION_FROM_RNA_POLYMERASE_II_PROMOTER(7)	GO:0000122	Details ...	47	-0.283933	-2.3185	0	0.00184029	0.243	12539	tags=96%, list=67%, signal=293%	NA
171	REGULATION_OF_SYNAPTIC_TRANSMISSION_CHOLINERGIC(4)	REGULATION_OF_SYNAPTIC_TRANSMISSION_CHOLINERGIC(4)	GO:0032222	Details ...	16	-0.486921	-2.31522	0	0.0019086	0.252	4901	tags=75%, list=26%, signal=102%	NA
172	POTASSIUM_ION_TRANSPORT(7)	POTASSIUM_ION_TRANSPORT(7)	GO:0006813	Details ...	22	-0.405146	-2.30425	0	0.00199478	0.264	8536	tags=86%, list=46%, signal=159%	NA
173	MULTI_MULTICELLULAR_ORGANISM_PROCESS(3)	MULTI_MULTICELLULAR_ORGANISM_PROCESS(3)	GO:0044706	Details ...	360	-0.106218	-2.29133	0.00209205	0.0021672	0.282	10513	tags=67%, list=57%, signal=151%	NA
174	ACTIN_FILAMENT_BASED_PROCESS(4)	ACTIN_FILAMENT_BASED_PROCESS(4)	GO:0030029	Details ...	183	-0.144002	-2.27361	0	0.00244748	0.311	14218	tags=91%, list=76%, signal=382%	NA
175	REGULATION_OF_CELLULAR_COMPONENT_ORGANIZATION(3)	REGULATION_OF_CELLULAR_COMPONENT_ORGANIZATION(3)	GO:0051128	Details ...	233	-0.129838	-2.27063	0	0.00249139	0.318	14856	tags=93%, list=80%, signal=455%	NA
176	CELLULAR_COMPONENT_ASSEMBLY_INVOLVED_IN_MORPHOGENESIS(4)	CELLULAR_COMPONENT_ASSEMBLY_INVOLVED_IN_MORPHOGENESIS(4)	GO:0010927	Details ...	168	-0.149691	-2.26447	0.00205761	0.00259997	0.332	13514	tags=88%, list=73%, signal=317%	NA
177	CELL_FATE_COMMITMENT_INVOLVED_IN_FORMATION_OF_PRIMARY_GERM_LAYER(5)	CELL_FATE_COMMITMENT_INVOLVED_IN_FORMATION_OF_PRIMARY_GERM_LAYER(5)	GO:0060795	Details ...	33	-0.332058	-2.26215	0.0019084	0.00261703	0.334	12433	tags=100%, list=67%, signal=301%	NA
178	POST_EMBRYONIC_MORPHOGENESIS(4)	POST_EMBRYONIC_MORPHOGENESIS(4)	GO:0009886	Details ...	18	-0.449385	-2.25133	0	0.00277419	0.352	7149	tags=83%, list=38%, signal=135%	NA
179	OLFACTORY_LEARNING(6)	OLFACTORY_LEARNING(6)	GO:0008355	Details ...	12	-0.535281	-2.24347	0.00198807	0.00291733	0.367	5550	tags=83%, list=30%, signal=119%	NA
180	BIOSYNTHETIC_PROCESS(3)	BIOSYNTHETIC_PROCESS(3)	GO:0009058	Details ...	397	-0.0982845	-2.23891	0	0.00294438	0.372	13951	tags=85%, list=75%, signal=332%	GO:0009058
181	DEVELOPMENTAL_GROWTH(3)	DEVELOPMENTAL_GROWTH(3)	GO:0048589	Details ...	378	-0.101774	-2.2379	0	0.00296606	0.376	15267	tags=92%, list=82%, signal=504%	NA
182	AMMONIUM_TRANSPORT(6)	AMMONIUM_TRANSPORT(6)	GO:0015696	Details ...	20	-0.418777	-2.23581	0	0.00296806	0.377	5239	tags=70%, list=28%, signal=97%	NA
183	REGULATION_OF_GROWTH(3)	REGULATION_OF_GROWTH(3)	GO:0040008	Details ...	381	-0.102429	-2.23554	0.00197239	0.00295184	0.377	15267	tags=92%, list=82%, signal=504%	GO:0040008
184	REGULATION_OF_LOCALIZATION(3)	REGULATION_OF_LOCALIZATION(3)	GO:0032879	Details ...	176	-0.143397	-2.22822	0	0.00311254	0.393	15533	tags=98%, list=84%, signal=588%	GO:0032879
185	CELLULAR_COMPONENT_BIOGENESIS(3)	CELLULAR_COMPONENT_BIOGENESIS(3)	GO:0044085	Details ...	302	-0.108912	-2.22431	0.00203252	0.00319394	0.403	14942	tags=91%, list=80%, signal=456%	NA
186	REGULATION_OF_SECRETION(5)	REGULATION_OF_SECRETION(5)	GO:0051046	Details ...	29	-0.348241	-2.21796	0.00211864	0.00335813	0.423	8925	tags=83%, list=48%, signal=159%	NA
187	RESPONSE_TO_ENDOGENOUS_STIMULUS(3)	RESPONSE_TO_ENDOGENOUS_STIMULUS(3)	GO:0009719	Details ...	36	-0.315026	-2.2176	0	0.00334018	0.423	11717	tags=94%, list=63%, signal=255%	NA
188	ACTIN_CYTOSKELETON_ORGANIZATION(5)	ACTIN_CYTOSKELETON_ORGANIZATION(5)	GO:0030036	Details ...	176	-0.145953	-2.21245	0.00196078	0.00341264	0.431	14218	tags=91%, list=76%, signal=382%	NA
189	ORGAN_MORPHOGENESIS(4)	ORGAN_MORPHOGENESIS(4)	GO:0009887	Details ...	57	-0.244673	-2.21158	0.00205339	0.00339458	0.431	14061	tags=100%, list=76%, signal=409%	NA
190	MUSCLE_CELL_DIFFERENTIATION(5)	MUSCLE_CELL_DIFFERENTIATION(5)	GO:0042692	Details ...	160	-0.149626	-2.21086	0	0.00340021	0.432	13514	tags=88%, list=73%, signal=317%	NA
191	DIRECTIONAL_LOCOMOTION(3)	DIRECTIONAL_LOCOMOTION(3)	GO:0033058	Details ...	14	-0.499147	-2.2078	0	0.00342504	0.436	5337	tags=79%, list=29%, signal=110%	NA
192	MOLTING_CYCLE(4)&MOLTING_CYCLE_COLLAGEN_AND_CUTICULIN_BASED_CUTICLE(5)	MOLTING_CYCLE(4)&MOLTING_CYCLE_COLLAGEN_AND_CUTICULIN_BASED_CUTICLE(5)	GO:0042303	Details ...	263	-0.11889	-2.20114	0	0.00351792	0.448	14579	tags=90%, list=78%, signal=411%	NA
193	REGULATION_OF_FEEDING_BEHAVIOR(4)	REGULATION_OF_FEEDING_BEHAVIOR(4)	GO:0060259	Details ...	38	-0.299927	-2.20016	0	0.00353479	0.452	9116	tags=79%, list=49%, signal=155%	NA
194	NEURON_MIGRATION(5)	NEURON_MIGRATION(5)	GO:0001764	Details ...	25	-0.367336	-2.19907	0.00203252	0.00355744	0.454	8056	tags=80%, list=43%, signal=141%	GO:0001764
195	CELLULAR_RESPONSE_TO_ENDOGENOUS_STIMULUS(4)	CELLULAR_RESPONSE_TO_ENDOGENOUS_STIMULUS(4)	GO:0071495	Details ...	35	-0.313419	-2.19296	0.00394477	0.00367168	0.464	11717	tags=94%, list=63%, signal=254%	NA
196	BACKWARD_LOCOMOTION(4)	BACKWARD_LOCOMOTION(4)	GO:0043057	Details ...	11	-0.531553	-2.19231	0	0.00366432	0.464	5337	tags=82%, list=29%, signal=115%	NA
197	RESPONSE_TO_NUTRIENT_LEVELS(5)	RESPONSE_TO_NUTRIENT_LEVELS(5)	GO:0031667	Details ...	33	-0.318426	-2.1908	0.00194175	0.00367438	0.468	10432	tags=88%, list=56%, signal=200%	NA
198	MATING(4)	MATING(4)	GO:0007618	Details ...	33	-0.321764	-2.19029	0	0.00366709	0.469	9243	tags=82%, list=50%, signal=162%	NA
199	REGULATION_OF_NEUROTRANSMITTER_LEVELS(4)	REGULATION_OF_NEUROTRANSMITTER_LEVELS(4)	GO:0001505	Details ...	42	-0.282655	-2.19001	0.00194175	0.00366533	0.47	8925	tags=76%, list=48%, signal=146%	GO:0001505
200	PROTEIN_LOCALIZATION(4)	PROTEIN_LOCALIZATION(4)	GO:0008104	Details ...	205	-0.132636	-2.18729	0.00203252	0.00371586	0.48	15432	tags=96%, list=83%, signal=559%	NA
201	POSITIVE_REGULATION_OF_MULTICELLULAR_ORGANISMAL_PROCESS(3)	POSITIVE_REGULATION_OF_MULTICELLULAR_ORGANISMAL_PROCESS(3)	GO:0051240	Details ...	387	-0.0984319	-2.18089	0.00203666	0.00384949	0.498	15267	tags=92%, list=82%, signal=502%	GO:0051240
202	REGULATION_OF_PHARYNGEAL_PUMPING(5)	REGULATION_OF_PHARYNGEAL_PUMPING(5)	GO:0043051	Details ...	35	-0.310425	-2.17705	0.0039604	0.00391938	0.506	9116	tags=80%, list=49%, signal=157%	NA
203	POSITIVE_REGULATION_OF_SYNAPTIC_TRANSMISSION(4)	POSITIVE_REGULATION_OF_SYNAPTIC_TRANSMISSION(4)	GO:0050806	Details ...	23	-0.388001	-2.17601	0	0.00393937	0.512	5731	tags=70%, list=31%, signal=100%	NA
204	POSITIVE_REGULATION_OF_SYNAPTIC_TRANSMISSION_CHOLINERGIC(5)	POSITIVE_REGULATION_OF_SYNAPTIC_TRANSMISSION_CHOLINERGIC(5)	GO:0032224	Details ...	15	-0.470215	-2.15702	0	0.00439726	0.554	4901	tags=73%, list=26%, signal=99%	NA
205	BIOLOGICAL_ADHESION(2)&CELL_ADHESION(3)	BIOLOGICAL_ADHESION(2)&CELL_ADHESION(3)	GO:0022610	Details ...	27	-0.338523	-2.15073	0	0.00459757	0.573	9556	tags=85%, list=51%, signal=175%	GO:0022610
206	NEGATIVE_REGULATION_OF_SIGNALING(3)&NEGATIVE_REGULATION_OF_CELL_COMMUNICATION(4)	NEGATIVE_REGULATION_OF_SIGNALING(3)&NEGATIVE_REGULATION_OF_CELL_COMMUNICATION(4)	GO:0023057	Details ...	59	-0.234636	-2.13642	0.00201207	0.00501613	0.606	13302	tags=95%, list=72%, signal=332%	GO:0023057
207	MULTICELLULAR_ORGANISM_GROWTH(3)	MULTICELLULAR_ORGANISM_GROWTH(3)	GO:0035264	Details ...	357	-0.0968974	-2.13623	0	0.00499742	0.606	15267	tags=92%, list=82%, signal=502%	NA
208	DETECTION_OF_STIMULUS_INVOLVED_IN_SENSORY_PERCEPTION(4)	DETECTION_OF_STIMULUS_INVOLVED_IN_SENSORY_PERCEPTION(4)	GO:0050906	Details ...	8	-0.61884	-2.1259	0.00403226	0.00531845	0.627	7094	tags=100%, list=38%, signal=162%	NA
209	POSITIVE_REGULATION_OF_GROWTH(3)	POSITIVE_REGULATION_OF_GROWTH(3)	GO:0045927	Details ...	342	-0.0990205	-2.12551	0.00380952	0.00534738	0.632	15267	tags=92%, list=82%, signal=503%	NA
210	CELLULAR_COMPONENT_ASSEMBLY(4)	CELLULAR_COMPONENT_ASSEMBLY(4)	GO:0022607	Details ...	293	-0.108884	-2.12409	0.004	0.00538178	0.638	14827	tags=90%, list=80%, signal=439%	NA
211	NITROGEN_COMPOUND_METABOLIC_PROCESS(3)	NITROGEN_COMPOUND_METABOLIC_PROCESS(3)	GO:0006807	Details ...	469	-0.0849863	-2.12086	0.00182482	0.00544767	0.646	16541	tags=97%, list=89%, signal=858%	GO:0006807
212	DOSAGE_COMPENSATION(7)	DOSAGE_COMPENSATION(7)	GO:0007549	Details ...	12	-0.494996	-2.11198	0.00207039	0.00568334	0.661	9398	tags=100%, list=51%, signal=202%	NA
213	NEUROTRANSMITTER_TRANSPORT(4)	NEUROTRANSMITTER_TRANSPORT(4)	GO:0006836	Details ...	36	-0.298467	-2.10497	0.00199601	0.00593548	0.679	8925	tags=78%, list=48%, signal=149%	NA
214	REGULATION_OF_OVIPOSITION(4)	REGULATION_OF_OVIPOSITION(4)	GO:0046662	Details ...	40	-0.281176	-2.10047	0.00598802	0.00608718	0.688	11055	tags=88%, list=59%, signal=215%	NA
215	POSITIVE_REGULATION_OF_MULTICELLULAR_ORGANISM_GROWTH(4)	POSITIVE_REGULATION_OF_MULTICELLULAR_ORGANISM_GROWTH(4)	GO:0040018	Details ...	325	-0.0977014	-2.09106	0	0.00641059	0.71	15267	tags=92%, list=82%, signal=503%	NA
216	REGULATION_OF_TRANSPORT(4)	REGULATION_OF_TRANSPORT(4)	GO:0051049	Details ...	73	-0.207739	-2.08546	0.00417537	0.00660615	0.728	9909	tags=74%, list=53%, signal=158%	NA
217	MUSCLE_CELL_DEVELOPMENT(5)	MUSCLE_CELL_DEVELOPMENT(5)	GO:0055001	Details ...	147	-0.145235	-2.08296	0.00407332	0.00667036	0.736	13514	tags=87%, list=73%, signal=316%	NA
218	SECRETION(4)	SECRETION(4)	GO:0046903	Details ...	142	-0.151386	-2.08167	0.0019685	0.00670834	0.741	13708	tags=89%, list=74%, signal=335%	NA
219	INDUCTIVE_CELL_MIGRATION(5)	INDUCTIVE_CELL_MIGRATION(5)	GO:0040039	Details ...	132	-0.157149	-2.07906	0.00219298	0.00679145	0.748	14991	tags=96%, list=81%, signal=493%	NA
220	POSITIVE_REGULATION_OF_CELL_COMMUNICATION(4)	POSITIVE_REGULATION_OF_CELL_COMMUNICATION(4)	GO:0010647	Details ...	67	-0.210741	-2.07837	0.00395257	0.00678621	0.75	11084	tags=81%, list=60%, signal=199%	NA
221	ASSOCIATIVE_LEARNING(6)	ASSOCIATIVE_LEARNING(6)	GO:0008306	Details ...	13	-0.471163	-2.07602	0.0020284	0.00684839	0.755	5550	tags=77%, list=30%, signal=110%	NA
222	CELLULAR_NITROGEN_COMPOUND_METABOLIC_PROCESS(4)	CELLULAR_NITROGEN_COMPOUND_METABOLIC_PROCESS(4)	GO:0034641	Details ...	440	-0.0829793	-2.07011	0.00202429	0.00710214	0.767	16541	tags=97%, list=89%, signal=857%	GO:0034641
223	STRIATED_MUSCLE_CELL_DIFFERENTIATION(6)	STRIATED_MUSCLE_CELL_DIFFERENTIATION(6)	GO:0051146	Details ...	147	-0.145235	-2.06962	0.00207469	0.00708012	0.767	13514	tags=87%, list=73%, signal=316%	NA
224	ANION_TRANSMEMBRANE_TRANSPORT(6)	ANION_TRANSMEMBRANE_TRANSPORT(6)	GO:0098656	Details ...	18	-0.399068	-2.06944	0.00754717	0.00705382	0.767	10150	tags=94%, list=55%, signal=208%	NA
225	REGULATION_OF_ACTIN_CYTOSKELETON_ORGANIZATION(5)	REGULATION_OF_ACTIN_CYTOSKELETON_ORGANIZATION(5)	GO:0032956	Details ...	17	-0.404388	-2.06828	0.00203666	0.00706772	0.768	9990	tags=94%, list=54%, signal=203%	NA
226	NEGATIVE_REGULATION_OF_NITROGEN_COMPOUND_METABOLIC_PROCESS(4)&NEGATIVE_REGULATION_OF_NUCLEOBASE_CONTAINING_COMPOUND_METABOLIC_PROCESS(5)	NEGATIVE_REGULATION_OF_NITROGEN_COMPOUND_METABOLIC_PROCESS(4)&NEGATIVE_REGULATION_OF_NUCLEOBASE_CONTAINING_COMPOUND_METABOLIC_PROCESS(5)	GO:0051172	Details ...	65	-0.218339	-2.0678	0.00393701	0.0070462	0.768	5396	tags=51%, list=29%, signal=71%	GO:0051172
227	OVIPOSITION(5)	OVIPOSITION(5)	GO:0018991	Details ...	335	-0.0996174	-2.06774	0.0020202	0.00701516	0.768	14724	tags=89%, list=79%, signal=420%	GO:0018991
228	NEGATIVE_REGULATION_OF_SIGNAL_TRANSDUCTION(4)	NEGATIVE_REGULATION_OF_SIGNAL_TRANSDUCTION(4)	GO:0009968	Details ...	58	-0.233744	-2.05908	0.00197239	0.00737401	0.783	13302	tags=95%, list=72%, signal=332%	NA
229	REGULATION_OF_DEVELOPMENTAL_GROWTH(4)	REGULATION_OF_DEVELOPMENTAL_GROWTH(4)	GO:0048638	Details ...	361	-0.0978682	-2.05611	0.00609756	0.00748493	0.788	15267	tags=92%, list=82%, signal=502%	GO:0048638
230	POSITIVE_REGULATION_OF_DEVELOPMENTAL_GROWTH(4)	POSITIVE_REGULATION_OF_DEVELOPMENTAL_GROWTH(4)	GO:0048639	Details ...	327	-0.0982293	-2.05298	0.0116959	0.0076186	0.799	15267	tags=92%, list=82%, signal=503%	NA
231	DORSAL_VENTRAL_AXON_GUIDANCE(7)	DORSAL_VENTRAL_AXON_GUIDANCE(7)	GO:0033563	Details ...	17	-0.412468	-2.04647	0	0.00793137	0.812	8746	tags=88%, list=47%, signal=166%	NA
232	ORGANIC_CYCLIC_COMPOUND_METABOLIC_PROCESS(4)	ORGANIC_CYCLIC_COMPOUND_METABOLIC_PROCESS(4)	GO:1901360	Details ...	434	-0.0848929	-2.03909	0.00202429	0.00825696	0.831	16541	tags=97%, list=89%, signal=859%	GO:1901360
233	STRIATED_MUSCLE_CELL_DEVELOPMENT(6)	STRIATED_MUSCLE_CELL_DEVELOPMENT(6)	GO:0055002	Details ...	146	-0.144335	-2.0351	0.00192308	0.0084544	0.836	13514	tags=87%, list=73%, signal=316%	NA
234	MATING_BEHAVIOR(5)	MATING_BEHAVIOR(5)	GO:0007617	Details ...	31	-0.30998	-2.0266	0	0.00876598	0.844	9243	tags=81%, list=50%, signal=160%	NA
235	POSITIVE_REGULATION_OF_VULVAL_DEVELOPMENT(4)	POSITIVE_REGULATION_OF_VULVAL_DEVELOPMENT(4)	GO:0040026	Details ...	50	-0.239907	-2.02612	0.00959693	0.00877229	0.845	12660	tags=92%, list=68%, signal=287%	NA
236	REGULATION_OF_MULTICELLULAR_ORGANISM_GROWTH(4)	REGULATION_OF_MULTICELLULAR_ORGANISM_GROWTH(4)	GO:0040014	Details ...	345	-0.0938555	-2.01671	0.00630252	0.00927225	0.861	15267	tags=91%, list=82%, signal=501%	NA
237	NEGATIVE_REGULATION_OF_MULTICELLULAR_ORGANISMAL_PROCESS(3)	NEGATIVE_REGULATION_OF_MULTICELLULAR_ORGANISMAL_PROCESS(3)	GO:0051241	Details ...	215	-0.119263	-1.99635	0.00414079	0.0105456	0.892	14156	tags=88%, list=76%, signal=364%	NA
238	CATION_TRANSMEMBRANE_TRANSPORT(6)	CATION_TRANSMEMBRANE_TRANSPORT(6)	GO:0098655	Details ...	39	-0.267098	-1.98526	0.00207039	0.0111614	0.91	12210	tags=92%, list=66%, signal=268%	NA
239	MYOFIBRIL_ASSEMBLY(5)&ACTOMYOSIN_STRUCTURE_ORGANIZATION(6)	MYOFIBRIL_ASSEMBLY(5)&ACTOMYOSIN_STRUCTURE_ORGANIZATION(6)	GO:0030239	Details ...	143	-0.14156	-1.98244	0.00974659	0.0113414	0.913	13514	tags=87%, list=73%, signal=315%	NA
240	HETEROCYCLE_METABOLIC_PROCESS(4)	HETEROCYCLE_METABOLIC_PROCESS(4)	GO:0046483	Details ...	423	-0.0841058	-1.97799	0	0.011645	0.921	16541	tags=97%, list=89%, signal=859%	GO:0046483
241	SECRETION_BY_CELL(4)	SECRETION_BY_CELL(4)	GO:0032940	Details ...	134	-0.144545	-1.97646	0.00428265	0.0117237	0.921	13708	tags=88%, list=74%, signal=333%	NA
242	FORMATION_OF_PRIMARY_GERM_LAYER(4)	FORMATION_OF_PRIMARY_GERM_LAYER(4)	GO:0001704	Details ...	36	-0.276449	-1.97532	0.012959	0.0117633	0.921	12433	tags=94%, list=67%, signal=284%	NA
243	CELL_JUNCTION_ORGANIZATION(4)	CELL_JUNCTION_ORGANIZATION(4)	GO:0034330	Details ...	19	-0.369787	-1.97426	0.00186567	0.0117935	0.921	9770	tags=89%, list=53%, signal=188%	NA
244	NUCLEOBASE_CONTAINING_COMPOUND_METABOLIC_PROCESS(4)	NUCLEOBASE_CONTAINING_COMPOUND_METABOLIC_PROCESS(4)	GO:0006139	Details ...	412	-0.0832803	-1.96457	0.00397614	0.0125018	0.93	16541	tags=97%, list=89%, signal=859%	GO:0006139
245	ASYMMETRIC_CELL_DIVISION(5)	ASYMMETRIC_CELL_DIVISION(5)	GO:0008356	Details ...	34	-0.285536	-1.96328	0.0105042	0.0125326	0.933	12203	tags=94%, list=66%, signal=273%	NA
246	MICROTUBULE_BASED_MOVEMENT(5)	MICROTUBULE_BASED_MOVEMENT(5)	GO:0007018	Details ...	33	-0.286267	-1.9631	0.00809717	0.0124953	0.933	12156	tags=94%, list=65%, signal=271%	NA
247	CELLULAR_AROMATIC_COMPOUND_METABOLIC_PROCESS(4)	CELLULAR_AROMATIC_COMPOUND_METABOLIC_PROCESS(4)	GO:0006725	Details ...	421	-0.0839586	-1.95551	0.00376648	0.0130475	0.943	16541	tags=97%, list=89%, signal=859%	GO:0006725
248	INTRACELLULAR_SIGNAL_TRANSDUCTION(5)	INTRACELLULAR_SIGNAL_TRANSDUCTION(5)	GO:0035556	Details ...	114	-0.156791	-1.94419	0.00581395	0.0139101	0.953	11458	tags=77%, list=62%, signal=200%	NA
249	EXCRETION(5)	EXCRETION(5)	GO:0007588	Details ...	47	-0.240878	-1.94032	0.004158	0.0141582	0.953	11755	tags=87%, list=63%, signal=237%	NA
250	DOSAGE_COMPENSATION_BY_HYPOACTIVATION_OF_X_CHROMOSOME(8)	DOSAGE_COMPENSATION_BY_HYPOACTIVATION_OF_X_CHROMOSOME(8)	GO:0042464	Details ...	10	-0.494942	-1.9382	0.0083682	0.0143242	0.957	9398	tags=100%, list=51%, signal=202%	NA
251	RESPONSE_TO_EXTRACELLULAR_STIMULUS(4)	RESPONSE_TO_EXTRACELLULAR_STIMULUS(4)	GO:0009991	Details ...	36	-0.272935	-1.93457	0.0139442	0.0145819	0.957	10432	tags=83%, list=56%, signal=189%	NA
252	SPECIFICATION_OF_SYMMETRY(5)&DETERMINATION_OF_BILATERAL_SYMMETRY(6)&DETERMINATION_OF_LEFT_RIGHT_SYMMETRY(7)	SPECIFICATION_OF_SYMMETRY(5)&DETERMINATION_OF_BILATERAL_SYMMETRY(6)&DETERMINATION_OF_LEFT_RIGHT_SYMMETRY(7)	GO:0009799	Details ...	9	-0.529994	-1.93346	0.00392927	0.0146047	0.957	8746	tags=100%, list=47%, signal=189%	NA
253	TRANSMEMBRANE_RECEPTOR_PROTEIN_SERINE_THREONINE_KINASE_SIGNALING_PATHWAY(7)	TRANSMEMBRANE_RECEPTOR_PROTEIN_SERINE_THREONINE_KINASE_SIGNALING_PATHWAY(7)	GO:0007178	Details ...	19	-0.373124	-1.92356	0.00814664	0.0155054	0.962	9708	tags=89%, list=52%, signal=187%	NA
254	AMEBOIDAL_TYPE_CELL_MIGRATION(5)	AMEBOIDAL_TYPE_CELL_MIGRATION(5)	GO:0001667	Details ...	23	-0.32889	-1.9223	0.0142857	0.0155476	0.965	11680	tags=96%, list=63%, signal=257%	NA
255	DENDRITE_DEVELOPMENT(4)	DENDRITE_DEVELOPMENT(4)	GO:0016358	Details ...	37	-0.262312	-1.91544	0.0041841	0.0160682	0.969	9708	tags=78%, list=52%, signal=164%	NA
256	TRANSMEMBRANE_RECEPTOR_PROTEIN_TYROSINE_KINASE_SIGNALING_PATHWAY(7)	TRANSMEMBRANE_RECEPTOR_PROTEIN_TYROSINE_KINASE_SIGNALING_PATHWAY(7)	GO:0007169	Details ...	37	-0.259574	-1.90631	0.00604839	0.016923	0.973	10764	tags=84%, list=58%, signal=199%	NA
257	POSITIVE_REGULATION_OF_POST_EMBRYONIC_DEVELOPMENT(4)&POSITIVE_REGULATION_OF_NEMATODE_LARVAL_DEVELOPMENT(5)	POSITIVE_REGULATION_OF_POST_EMBRYONIC_DEVELOPMENT(4)&POSITIVE_REGULATION_OF_NEMATODE_LARVAL_DEVELOPMENT(5)	GO:0048582	Details ...	52	-0.223734	-1.90508	0.0137795	0.0169458	0.973	12660	tags=90%, list=68%, signal=282%	NA
258	POSITIVE_REGULATION_OF_CELL_DEATH(4)	POSITIVE_REGULATION_OF_CELL_DEATH(4)	GO:0010942	Details ...	34	-0.271811	-1.90409	0.00854701	0.0169906	0.973	10270	tags=82%, list=55%, signal=184%	NA
259	NEGATIVE_REGULATION_OF_LOCOMOTION(3)	NEGATIVE_REGULATION_OF_LOCOMOTION(3)	GO:0040013	Details ...	19	-0.363004	-1.90122	0.00608519	0.0172178	0.973	9896	tags=89%, list=53%, signal=191%	NA
260	STRIATED_MUSCLE_CONTRACTION(7)	STRIATED_MUSCLE_CONTRACTION(7)	GO:0006941	Details ...	14	-0.413395	-1.89535	0.00784314	0.0177273	0.975	9587	tags=93%, list=52%, signal=192%	NA
261	POST_EMBRYONIC_BODY_MORPHOGENESIS(5)	POST_EMBRYONIC_BODY_MORPHOGENESIS(5)	GO:0040032	Details ...	12	-0.452289	-1.89309	0.0116505	0.0179022	0.976	8642	tags=92%, list=46%, signal=171%	NA
262	POSITIVE_REGULATION_OF_SIGNALING(3)	POSITIVE_REGULATION_OF_SIGNALING(3)	GO:0023056	Details ...	64	-0.202265	-1.89001	0.015444	0.0181275	0.977	11943	tags=84%, list=64%, signal=235%	NA
263	ENDODERM_DEVELOPMENT(5)	ENDODERM_DEVELOPMENT(5)	GO:0007492	Details ...	20	-0.352929	-1.88582	0.0118812	0.0184349	0.979	12041	tags=100%, list=65%, signal=283%	NA
264	REGULATION_OF_NEUROTRANSMITTER_SECRETION(4)&REGULATION_OF_NEUROTRANSMITTER_TRANSPORT(5)	REGULATION_OF_NEUROTRANSMITTER_SECRETION(4)&REGULATION_OF_NEUROTRANSMITTER_TRANSPORT(5)	GO:0046928	Details ...	16	-0.382723	-1.88105	0.0137255	0.0188754	0.98	6837	tags=75%, list=37%, signal=119%	NA
265	SIGNAL_RELEASE(5)	SIGNAL_RELEASE(5)	GO:0023061	Details ...	35	-0.262438	-1.87475	0.01417	0.0194234	0.983	10538	tags=83%, list=57%, signal=191%	NA
266	INORGANIC_ION_TRANSMEMBRANE_TRANSPORT(5)	INORGANIC_ION_TRANSMEMBRANE_TRANSPORT(5)	GO:0098660	Details ...	36	-0.260632	-1.86301	0.00824742	0.0207308	0.987	12210	tags=92%, list=66%, signal=266%	NA
267	DEFECATION(6)	DEFECATION(6)	GO:0030421	Details ...	45	-0.235164	-1.85745	0.0120482	0.021261	0.987	11755	tags=87%, list=63%, signal=235%	NA
268	DOPAMINE_RECEPTOR_SIGNALING_PATHWAY(7)	DOPAMINE_RECEPTOR_SIGNALING_PATHWAY(7)	GO:0007212	Details ...	13	-0.428833	-1.85438	0.00200803	0.0216264	0.989	10628	tags=100%, list=57%, signal=233%	NA
269	SMALL_GTPASE_MEDIATED_SIGNAL_TRANSDUCTION(6)	SMALL_GTPASE_MEDIATED_SIGNAL_TRANSDUCTION(6)	GO:0007264	Details ...	48	-0.222922	-1.8426	0.00965251	0.0229654	0.993	13300	tags=94%, list=72%, signal=328%	NA
270	WNT_SIGNALING_PATHWAY(6)	WNT_SIGNALING_PATHWAY(6)	GO:0016055	Details ...	29	-0.284026	-1.83754	0.0121212	0.0234556	0.997	12041	tags=93%, list=65%, signal=264%	NA
271	NUCLEIC_ACID_METABOLIC_PROCESS(5)	NUCLEIC_ACID_METABOLIC_PROCESS(5)	GO:0090304	Details ...	360	-0.0815853	-1.83542	0.0218688	0.0236346	0.997	16541	tags=97%, list=89%, signal=860%	GO:0090304
272	POSITIVE_REGULATION_OF_RESPONSE_TO_STIMULUS(3)	POSITIVE_REGULATION_OF_RESPONSE_TO_STIMULUS(3)	GO:0048584	Details ...	52	-0.213264	-1.8312	0.0196937	0.0241318	0.997	13927	tags=96%, list=75%, signal=382%	NA
273	NEURON_NEURON_SYNAPTIC_TRANSMISSION(4)	NEURON_NEURON_SYNAPTIC_TRANSMISSION(4)	GO:0007270	Details ...	21	-0.335794	-1.82921	0.0182927	0.024396	0.997	7932	tags=76%, list=43%, signal=133%	NA
274	ENDODERM_FORMATION(5)&ENDODERMAL_CELL_FATE_COMMITMENT(6)&ENDODERMAL_CELL_DIFFERENTIATION(6)	ENDODERM_FORMATION(5)&ENDODERMAL_CELL_FATE_COMMITMENT(6)&ENDODERMAL_CELL_DIFFERENTIATION(6)	GO:0001706	Details ...	18	-0.352891	-1.82553	0.0193798	0.0247498	0.997	12041	tags=100%, list=65%, signal=283%	NA
275	NEGATIVE_REGULATION_OF_MACROMOLECULE_BIOSYNTHETIC_PROCESS(5)&NEGATIVE_REGULATION_OF_CELLULAR_MACROMOLECULE_BIOSYNTHETIC_PROCESS(6)	NEGATIVE_REGULATION_OF_MACROMOLECULE_BIOSYNTHETIC_PROCESS(5)&NEGATIVE_REGULATION_OF_CELLULAR_MACROMOLECULE_BIOSYNTHETIC_PROCESS(6)	GO:0010558	Details ...	75	-0.177265	-1.8155	0.0185567	0.0261937	0.998	5396	tags=47%, list=29%, signal=65%	GO:0010558
276	SENSORY_PERCEPTION_OF_CHEMICAL_STIMULUS(7)	SENSORY_PERCEPTION_OF_CHEMICAL_STIMULUS(7)	GO:0007606	Details ...	14	-0.404593	-1.81449	0.0162602	0.0262422	0.998	7094	tags=79%, list=38%, signal=127%	NA
277	NEGATIVE_REGULATION_OF_BIOSYNTHETIC_PROCESS(4)&NEGATIVE_REGULATION_OF_CELLULAR_BIOSYNTHETIC_PROCESS(5)	NEGATIVE_REGULATION_OF_BIOSYNTHETIC_PROCESS(4)&NEGATIVE_REGULATION_OF_CELLULAR_BIOSYNTHETIC_PROCESS(5)	GO:0009890	Details ...	76	-0.174173	-1.79738	0.018	0.0287284	0.999	6318	tags=51%, list=34%, signal=77%	GO:0009890
278	EPITHELIUM_DEVELOPMENT(5)	EPITHELIUM_DEVELOPMENT(5)	GO:0060429	Details ...	68	-0.179776	-1.7916	0.022	0.0294672	0.999	11711	tags=81%, list=63%, signal=218%	NA
279	DIGESTIVE_TRACT_MORPHOGENESIS(4)	DIGESTIVE_TRACT_MORPHOGENESIS(4)	GO:0048546	Details ...	18	-0.352454	-1.77883	0.0155642	0.0316235	1	11016	tags=94%, list=59%, signal=231%	NA
280	TISSUE_MORPHOGENESIS(4)	TISSUE_MORPHOGENESIS(4)	GO:0048729	Details ...	56	-0.206831	-1.77846	0.0185874	0.0315953	1	3804	tags=41%, list=20%, signal=51%	NA
281	REGULATION_OF_INTRACELLULAR_SIGNAL_TRANSDUCTION(5)	REGULATION_OF_INTRACELLULAR_SIGNAL_TRANSDUCTION(5)	GO:1902531	Details ...	69	-0.181675	-1.77451	0.0137525	0.0321934	1	11458	tags=80%, list=62%, signal=207%	NA
282	ENDODERMAL_CELL_FATE_SPECIFICATION(6)	ENDODERMAL_CELL_FATE_SPECIFICATION(6)	GO:0001714	Details ...	17	-0.352872	-1.77198	0.0115607	0.0324629	1	12041	tags=100%, list=65%, signal=283%	NA
283	METAL_ION_TRANSPORT(6)	METAL_ION_TRANSPORT(6)	GO:0030001	Details ...	51	-0.206773	-1.76187	0.0235756	0.0342487	1	12210	tags=86%, list=66%, signal=251%	NA
284	NEUROPEPTIDE_SIGNALING_PATHWAY(7)	NEUROPEPTIDE_SIGNALING_PATHWAY(7)	GO:0007218	Details ...	12	-0.412828	-1.7604	0.0139721	0.0344078	1	10925	tags=100%, list=59%, signal=242%	NA
285	REGULATION_OF_DEFENSE_RESPONSE(5)	REGULATION_OF_DEFENSE_RESPONSE(5)	GO:0031347	Details ...	9	-0.478291	-1.7563	0.0244898	0.0349674	1	9707	tags=100%, list=52%, signal=209%	NA
286	REGULATION_OF_SECRETION_BY_CELL(5)	REGULATION_OF_SECRETION_BY_CELL(5)	GO:1903530	Details ...	22	-0.314584	-1.74649	0.0217822	0.0367781	1	6837	tags=68%, list=37%, signal=108%	NA
287	NEUROTRANSMITTER_SECRETION(5)	NEUROTRANSMITTER_SECRETION(5)	GO:0007269	Details ...	31	-0.262485	-1.74467	0.0194175	0.0370293	1	8925	tags=74%, list=48%, signal=142%	NA
288	RAS_PROTEIN_SIGNAL_TRANSDUCTION(7)	RAS_PROTEIN_SIGNAL_TRANSDUCTION(7)	GO:0007265	Details ...	46	-0.220173	-1.73819	0.0346939	0.0379958	1	13300	tags=93%, list=72%, signal=327%	NA
289	SYNAPSE_ASSEMBLY(5)	SYNAPSE_ASSEMBLY(5)	GO:0007416	Details ...	9	-0.474836	-1.73245	0.0199601	0.0389498	1	7705	tags=89%, list=41%, signal=152%	GO:0007416
290	REGULATION_OF_SYNAPSE_STRUCTURE_OR_ACTIVITY(4)	REGULATION_OF_SYNAPSE_STRUCTURE_OR_ACTIVITY(4)	GO:0050803	Details ...	13	-0.394153	-1.72886	0.0226843	0.0395407	1	9842	tags=92%, list=53%, signal=196%	NA
291	REGULATION_OF_CELL_MIGRATION(5)	REGULATION_OF_CELL_MIGRATION(5)	GO:0030334	Details ...	57	-0.19188	-1.71539	0.0217391	0.0421733	1	14061	tags=95%, list=76%, signal=387%	NA
292	RESPONSE_TO_STARVATION(4)	RESPONSE_TO_STARVATION(4)	GO:0042594	Details ...	25	-0.279449	-1.69715	0.0200401	0.0462633	1	10432	tags=84%, list=56%, signal=191%	NA
293	MRNA_SPLICING_VIA_SPLICEOSOME(8)&RNA_SPLICING_VIA_TRANSESTERIFICATION_REACTIONS_WITH_BULGED_ADENOSINE_AS_NUCLEOPHILE(9)	MRNA_SPLICING_VIA_SPLICEOSOME(8)&RNA_SPLICING_VIA_TRANSESTERIFICATION_REACTIONS_WITH_BULGED_ADENOSINE_AS_NUCLEOPHILE(9)	GO:0000398	Details ...	19	-0.323263	-1.69434	0.0332681	0.0466413	1	11613	tags=95%, list=62%, signal=252%	NA
294	ORGANIC_HYDROXY_COMPOUND_TRANSPORT(4)	ORGANIC_HYDROXY_COMPOUND_TRANSPORT(4)	GO:0015850	Details ...	12	-0.403734	-1.69195	0.0396825	0.0469771	1	6445	tags=75%, list=35%, signal=115%	NA
295	REGULATION_OF_IMMUNE_SYSTEM_PROCESS(3)&REGULATION_OF_IMMUNE_RESPONSE(4)	REGULATION_OF_IMMUNE_SYSTEM_PROCESS(3)&REGULATION_OF_IMMUNE_RESPONSE(4)	GO:0002682	Details ...	9	-0.466025	-1.68933	0.0398406	0.0475587	1	9935	tags=100%, list=53%, signal=215%	NA
296	REGULATION_OF_SMALL_GTPASE_MEDIATED_SIGNAL_TRANSDUCTION(6)&REGULATION_OF_RAS_PROTEIN_SIGNAL_TRANSDUCTION(7)	REGULATION_OF_SMALL_GTPASE_MEDIATED_SIGNAL_TRANSDUCTION(6)&REGULATION_OF_RAS_PROTEIN_SIGNAL_TRANSDUCTION(7)	GO:0051056	Details ...	35	-0.241497	-1.68793	0.0218688	0.0477406	1	11458	tags=86%, list=62%, signal=223%	NA
297	AUTOPHAGY(5)	AUTOPHAGY(5)	GO:0006914	Details ...	28	-0.267426	-1.68272	0.0293542	0.0488739	1	11639	tags=89%, list=63%, signal=238%	NA
298	REGULATION_OF_SYSTEM_PROCESS(4)	REGULATION_OF_SYSTEM_PROCESS(4)	GO:0044057	Details ...	24	-0.288355	-1.68094	0.0397614	0.0491779	1	11692	tags=92%, list=63%, signal=247%	NA
299	RESPONSE_TO_GROWTH_FACTOR(5)&CELLULAR_RESPONSE_TO_GROWTH_FACTOR_STIMULUS(6)	RESPONSE_TO_GROWTH_FACTOR(5)&CELLULAR_RESPONSE_TO_GROWTH_FACTOR_STIMULUS(6)	GO:0070848	Details ...	19	-0.320439	-1.67638	0.0202429	0.0502045	1	9708	tags=84%, list=52%, signal=176%	NA
300	ACETATE_ESTER_TRANSPORT(4)&ACETYLCHOLINE_TRANSPORT(5)	ACETATE_ESTER_TRANSPORT(4)&ACETYLCHOLINE_TRANSPORT(5)	GO:1901374	Details ...	16	-0.343622	-1.67155	0.0281125	0.0512505	1	5239	tags=63%, list=28%, signal=87%	NA
301	STRIATED_MUSCLE_CONTRACTION_INVOLVED_IN_EMBRYONIC_BODY_MORPHOGENESIS(6)	STRIATED_MUSCLE_CONTRACTION_INVOLVED_IN_EMBRYONIC_BODY_MORPHOGENESIS(6)	GO:0061199	Details ...	10	-0.434435	-1.67087	0.0178926	0.0513063	1	8663	tags=90%, list=47%, signal=168%	NA
302	CELL_JUNCTION_ASSEMBLY(5)	CELL_JUNCTION_ASSEMBLY(5)	GO:0034329	Details ...	16	-0.349973	-1.67058	0.0362473	0.0511925	1	9770	tags=88%, list=53%, signal=184%	NA
303	INTRACELLULAR_TRANSPORT(5)	INTRACELLULAR_TRANSPORT(5)	GO:0046907	Details ...	73	-0.163327	-1.66463	0.0304183	0.052518	1	14298	tags=93%, list=77%, signal=401%	NA
304	ORGANIC_ACID_TRANSPORT(4)&CARBOXYLIC_ACID_TRANSPORT(5)	ORGANIC_ACID_TRANSPORT(4)&CARBOXYLIC_ACID_TRANSPORT(5)	GO:0015849	Details ...	12	-0.393134	-1.66181	0.0286299	0.0530197	1	11291	tags=100%, list=61%, signal=254%	NA
305	REGULATION_OF_ASYMMETRIC_CELL_DIVISION(5)	REGULATION_OF_ASYMMETRIC_CELL_DIVISION(5)	GO:0009786	Details ...	13	-0.37661	-1.64344	0.0285132	0.0579856	1	10168	tags=92%, list=55%, signal=204%	NA
306	ORGANIC_ANION_TRANSPORT(6)	ORGANIC_ANION_TRANSPORT(6)	GO:0015711	Details ...	17	-0.329088	-1.64085	0.0315126	0.0585321	1	11389	tags=94%, list=61%, signal=243%	NA
307	REGULATION_OF_TRANSMEMBRANE_RECEPTOR_PROTEIN_SERINE_THREONINE_KINASE_SIGNALING_PATHWAY(5)	REGULATION_OF_TRANSMEMBRANE_RECEPTOR_PROTEIN_SERINE_THREONINE_KINASE_SIGNALING_PATHWAY(5)	GO:0090092	Details ...	12	-0.394928	-1.63821	0.0419847	0.0592149	1	9708	tags=92%, list=52%, signal=192%	NA
308	RESPONSE_TO_HORMONE(4)&CELLULAR_RESPONSE_TO_HORMONE_STIMULUS(5)	RESPONSE_TO_HORMONE(4)&CELLULAR_RESPONSE_TO_HORMONE_STIMULUS(5)	GO:0009725	Details ...	15	-0.353171	-1.63626	0.049896	0.059656	1	10795	tags=93%, list=58%, signal=222%	NA
309	RESPONSE_TO_HYPOXIA(4)	RESPONSE_TO_HYPOXIA(4)	GO:0001666	Details ...	10	-0.416141	-1.61665	0.0383065	0.0652586	1	9003	tags=90%, list=48%, signal=174%	NA
310	SECOND_MESSENGER_MEDIATED_SIGNALING(6)	SECOND_MESSENGER_MEDIATED_SIGNALING(6)	GO:0019932	Details ...	10	-0.425126	-1.61613	0.04	0.0652415	1	8836	tags=90%, list=48%, signal=171%	NA
311	RESPONSE_TO_TRANSFORMING_GROWTH_FACTOR_BETA(4)&CELLULAR_RESPONSE_TO_TRANSFORMING_GROWTH_FACTOR_BETA_STIMULUS(5)&TRANSFORMING_GROWTH_FACTOR_BETA_RECEPTOR_SIGNALING_PATHWAY(6)	RESPONSE_TO_TRANSFORMING_GROWTH_FACTOR_BETA(4)&CELLULAR_RESPONSE_TO_TRANSFORMING_GROWTH_FACTOR_BETA_STIMULUS(5)&TRANSFORMING_GROWTH_FACTOR_BETA_RECEPTOR_SIGNALING_PATHWAY(6)	GO:0071559	Details ...	13	-0.370231	-1.61496	0.0268595	0.0654184	1	11717	tags=100%, list=63%, signal=270%	NA
312	TURNING_BEHAVIOR(4)&TURNING_BEHAVIOR_INVOLVED_IN_MATING(5)	TURNING_BEHAVIOR(4)&TURNING_BEHAVIOR_INVOLVED_IN_MATING(5)	GO:0035178	Details ...	12	-0.387717	-1.61369	0.0477178	0.0656154	1	5193	tags=67%, list=28%, signal=92%	NA
313	POSITIVE_REGULATION_OF_PROGRAMMED_CELL_DEATH(5)	POSITIVE_REGULATION_OF_PROGRAMMED_CELL_DEATH(5)	GO:0043068	Details ...	23	-0.286891	-1.61167	0.0472279	0.0657872	1	10843	tags=87%, list=58%, signal=208%	NA
314	TUBE_MORPHOGENESIS(4)	TUBE_MORPHOGENESIS(4)	GO:0035239	Details ...	20	-0.308	-1.60596	0.0396825	0.0674592	1	11016	tags=90%, list=59%, signal=221%	NA
315	RESPONSE_TO_PEPTIDE_HORMONE(5)&RESPONSE_TO_PEPTIDE(5)&RESPONSE_TO_INSULIN(6)&CELLULAR_RESPONSE_TO_PEPTIDE_HORMONE_STIMULUS(6)&CELLULAR_RESPONSE_TO_PEPTIDE(6)&CELLULAR_RESPONSE_TO_INSULIN_STIMULUS(7)&INSULIN_RECEPTOR_SIGNALING_PATHWAY(8)	RESPONSE_TO_PEPTIDE_HORMONE(5)&RESPONSE_TO_PEPTIDE(5)&RESPONSE_TO_INSULIN(6)&CELLULAR_RESPONSE_TO_PEPTIDE_HORMONE_STIMULUS(6)&CELLULAR_RESPONSE_TO_PEPTIDE(6)&CELLULAR_RESPONSE_TO_INSULIN_STIMULUS(7)&INSULIN_RECEPTOR_SIGNALING_PATHWAY(8)	GO:0043434	Details ...	14	-0.350055	-1.59373	0.0417495	0.0709231	1	10764	tags=93%, list=58%, signal=220%	NA
316	POSITIVE_REGULATION_OF_SECRETION(4)	POSITIVE_REGULATION_OF_SECRETION(4)	GO:0051047	Details ...	17	-0.316015	-1.59342	0.0474308	0.0708245	1	10538	tags=88%, list=57%, signal=203%	NA
317	MALE_MATING_BEHAVIOR(5)	MALE_MATING_BEHAVIOR(5)	GO:0060179	Details ...	25	-0.263365	-1.5849	0.0445344	0.0736079	1	9243	tags=76%, list=50%, signal=151%	NA
318	PEPTIDYL_AMINO_ACID_MODIFICATION(7)	PEPTIDYL_AMINO_ACID_MODIFICATION(7)	GO:0018193	Details ...	68	-0.156066	-1.54419	0.0338645	0.0865408	1	14885	tags=96%, list=80%, signal=477%	NA

## Sheet: AgvsControl_genes_top_20_BPs
Supplementary data 2. Gene ontology enrichment by GSEA
NAME	APOPTOTIC_PROCESS(6)	Description	GENE SYMBOL	GENE_TITLE	RANK IN GENE LIST	RANK METRIC SCORE	RUNNING ES	CORE ENRICHMENT
row_0	185448	Nematode Specific Peptide family, group B	null	null	107	1.92272	-0.00359849	Yes
row_1	178048	NA	null	null	591	1.14202	-0.0279018	Yes
row_2	186642	pseudo	null	null	710	1.07443	-0.0321061	Yes
row_3	172327	PaNtothenate Kinase	null	null	766	1.04493	-0.0328411	Yes
row_4	179043	fatty Acid CoA Synthetase family	null	null	821	1.01049	-0.0335211	Yes
row_5	175007	Caspase A subunit p16	null	null	887	0.977282	-0.0348068	Yes
row_6	185446	Nematode Specific Peptide family, group B	null	null	961	0.946176	-0.0365331	Yes
row_7	172414	ATP-dependent RNA helicase glh-1	null	null	1010	0.920538	-0.0368827	Yes
row_8	191742	Patterned Expression Site	null	null	1080	0.89297	-0.0383886	Yes
row_9	188003	hypothetical protein	null	null	1182	0.846614	-0.0416567	Yes
row_10	176061	ATP-dependent RNA helicase cgh-1	null	null	1258	0.816529	-0.0434931	Yes
row_11	179919	hypothetical protein	null	null	1263	0.813411	-0.0414198	Yes
row_12	177255	Multiple PDZ domain protein	null	null	1362	0.777254	-0.0445227	Yes
row_13	174273	PERMeable eggshell	null	null	1529	0.716936	-0.0513701	Yes
row_14	172244	Cytoplasmic polyadenylation element-binding protein 3	null	null	1722	0.661271	-0.0596492	Yes
row_15	172604	hypothetical protein	null	null	1733	0.657587	-0.0579063	Yes
row_16	173158	Cytokinesis, Apoptosis, RNA-associated	null	null	1864	0.619669	-0.0627713	Yes
row_17	177406	PUF (Pumilio/FBF) domain-containing	null	null	1873	0.617496	-0.0609182	Yes
row_18	176373	Eukaryotic translation initiation factor 5A	null	null	1941	0.600038	-0.0623141	Yes
row_19	177066	Uncharacterized protein	null	null	1948	0.59883	-0.0603509	Yes
row_20	178320	PUF (Pumilio/FBF) domain-containing	null	null	2047	0.575904	-0.0634538	Yes
row_21	180102	hypothetical protein	null	null	2056	0.574177	-0.0616008	Yes
row_22	185027	hypothetical protein	null	null	2121	0.558387	-0.0628314	Yes
row_23	174055	Anillin-like protein 2	null	null	2168	0.550571	-0.0630709	Yes
row_24	177948	Zinc finger In Meiosis	null	null	2196	0.542092	-0.0622641	Yes
row_25	175804	EGG sterile (unfertilizable)	null	null	2209	0.539239	-0.0606313	Yes
row_26	172361	ATP-dependent RNA helicase glh-2	null	null	2221	0.537103	-0.0589434	Yes
row_27	188246	Zinc finger In Meiosis	null	null	2248	0.530479	-0.0580816	Yes
row_28	172508	CHitin Synthase	null	null	2320	0.52052	-0.0596977	Yes
row_29	181957	hypothetical protein	null	null	2341	0.51727	-0.0585054	Yes
row_30	3565259	Zinc finger In Meiosis	null	null	2397	0.509179	-0.0592405	Yes
row_31	175605	ATP Synthase B homolog	null	null	2526	0.488058	-0.0639954	Yes
row_32	176092	Cytokinesis defective protein 7	null	null	2532	0.486852	-0.0619771	Yes
row_33	175717	Protein arginine N-methyltransferase 5	null	null	2584	0.477327	-0.0624919	Yes
row_34	172488	Innexin-14	null	null	2612	0.471843	-0.0616851	Yes
row_35	171786	TPX2 (Targeting Protein for Xenopus Klp2)-Like	null	null	2646	0.466626	-0.0612087	Yes
row_36	172760	Protein lin-41	null	null	2660	0.464905	-0.059631	Yes
row_37	172860	Histone H2A	null	null	2665	0.46393	-0.0575577	Yes
row_38	171938	MSH (MutS Homolog) family	null	null	2679	0.460876	-0.05598	Yes
row_39	178201	Bloom syndrome protein homolog	null	null	2685	0.459463	-0.0539617	Yes
row_40	171693	hypothetical protein	null	null	2693	0.458002	-0.0520536	Yes
row_41	176098	hypothetical protein	null	null	2769	0.445758	-0.05389	Yes
row_42	174174	Defective in germ line development protein 3	null	null	2818	0.437264	-0.0542396	Yes
row_43	174677	EGG sterile (unfertilizable)	null	null	2922	0.419526	-0.0576178	Yes
row_44	174590	ATPase family AAA domain-containing protein 3	null	null	2944	0.416897	-0.0564806	Yes
row_45	172353	M-phase inducer phosphatase cdc-25.1	null	null	2955	0.415785	-0.0547377	Yes
row_46	172617	60S ribosomal protein L23a 2	null	null	2970	0.414186	-0.0532151	Yes
row_47	3565443	UDP-GlucuronosylTransferase	null	null	3026	0.406051	-0.0539501	Yes
row_48	172442	Asparagine--tRNA ligase, cytoplasmic	null	null	3028	0.405897	-0.0517116	Yes
row_49	173689	hypothetical protein	null	null	3082	0.398669	-0.0523365	Yes
row_50	171939	human HUS1 related	null	null	3091	0.39781	-0.0504835	Yes
row_51	191632	ADP-ribosylation factor-like protein 2	null	null	3096	0.397485	-0.0484102	Yes
row_52	176754	Aspergillus NUclear Division related	null	null	3147	0.389334	-0.0488699	Yes
row_53	175499	BRCa homolog (tumor suppressor gene Brca1)	null	null	3181	0.38491	-0.0483935	Yes
row_54	173872	Securin-like protein	null	null	3238	0.376895	-0.0491836	Yes
row_55	189267	CTP synthase	null	null	3278	0.372597	-0.0490376	Yes
row_56	174291	DNA-(apurinic or apyrimidinic site) lyase	null	null	3297	0.370516	-0.0477352	Yes
row_57	174658	ECT2 (mammalian Rho GEF) homolog	null	null	3316	0.367811	-0.0464328	Yes
row_58	188247	High Incidence of Males (increased X chromosome loss)	null	null	3321	0.367155	-0.0443595	Yes
row_59	183841	URI (Unconventional prefoldin RPB5 Interactor) homolog	null	null	3335	0.365528	-0.0427818	Yes
row_60	173224	Valine--tRNA ligase	null	null	3375	0.361245	-0.0426358	Yes
row_61	172773	SKp1 Related (ubiquitin ligase complex component)	null	null	3399	0.359156	-0.0416087	Yes
row_62	178507	Heat shock 70 kDa protein A	null	null	3400	0.358785	-0.0393152	Yes
row_63	176118	Adenylate kinase	null	null	3402	0.358686	-0.0370767	Yes
row_64	178272	Cell death protein 3 subunit 2	null	null	3471	0.350745	-0.0385276	Yes
row_65	177753	26S proteasome non-ATPase regulatory subunit 6	null	null	3525	0.346138	-0.0391525	Yes
row_66	175217	Ca(2+)/calmodulin-dependent protein kinase phosphatase	null	null	3529	0.345524	-0.0370241	Yes
row_67	13184808	Mannosyltransferase	null	null	3543	0.343843	-0.0354464	Yes
row_68	175404	Kruppel-Like Factor (zinc finger protein)	null	null	3547	0.343761	-0.033318	Yes
row_69	173238	hypothetical protein	null	null	3587	0.33969	-0.033172	Yes
row_70	179678	DNA repair protein rad-50	null	null	3631	0.335449	-0.0332463	Yes
row_71	174431	Mitochondrial import receptor subunit TOM40 homolog	null	null	3633	0.334933	-0.0310078	Yes
row_72	175873	ABC transporter, class F	null	null	3712	0.327135	-0.0330093	Yes
row_73	176361	Tubulin gamma chain	null	null	3776	0.320576	-0.0341849	Yes
row_74	172562	Non-muscle MYosin	null	null	3787	0.319906	-0.032442	Yes
row_75	177587	Centromere/kinetochore protein zw10 homolog	null	null	3806	0.318761	-0.0311396	Yes
row_76	176196	26S proteasome non-ATPase regulatory subunit 3	null	null	3822	0.317251	-0.029672	Yes
row_77	179202	Aurora/Ipl1 Related kinase	null	null	3892	0.310809	-0.031178	Yes
row_78	176268	Eukaryotic translation initiation factor 3 subunit D	null	null	3924	0.307331	-0.0305915	Yes
row_79	175096	Histone-lysine N-methyltransferase mes-2	null	null	3925	0.307126	-0.0282979	Yes
row_80	177703	CCCH-type zinc finger protein oma-1	null	null	3948	0.305627	-0.0272158	Yes
row_81	175819	Chaperonin Containing TCP-1	null	null	3998	0.30117	-0.0276205	Yes
row_82	3565440	IMportin Beta family	null	null	4018	0.298768	-0.0263731	Yes
row_83	177791	TRansport of membrane to Cell Surface	null	null	4078	0.29455	-0.0273285	Yes
row_84	172794	DeoxyUTPase	null	null	4138	0.28902	-0.0282838	Yes
row_85	266650	NEDD8-activating enzyme E1 regulatory subunit	null	null	4163	0.286095	-0.0273118	Yes
row_86	175885	GEN1 Holliday junction resolvase homolog	null	null	4172	0.285407	-0.0254587	Yes
row_87	177855	UBA (human ubiquitin) related	null	null	4178	0.285257	-0.0234405	Yes
row_88	177914	Uncharacterized protein	null	null	4243	0.281661	-0.0246711	Yes
row_89	175982	NEDD8-activating enzyme E1 catalytic subunit	null	null	4255	0.280324	-0.0229833	Yes
row_90	177678	Phosphoacetylglucosamine mutase	null	null	4257	0.280148	-0.0207448	Yes
row_91	177455	proteasome Regulatory Particle, Non-ATPase-like	null	null	4303	0.277594	-0.0209292	Yes
row_92	174634	Cell-death-Related Nuclease	null	null	4307	0.277312	-0.0188008	Yes
row_93	173414	MItochondrial Solute Carrier	null	null	4310	0.277006	-0.0166173	Yes
row_94	173168	Proteasome subunit beta type	null	null	4335	0.274823	-0.0156453	Yes
row_95	179508	hypothetical protein	null	null	4355	0.273361	-0.014398	Yes
row_96	171809	Eukaryotic Initiation Factor	null	null	4364	0.272826	-0.012545	Yes
row_97	174203	Heat Shock Protein	null	null	4383	0.271779	-0.0112426	Yes
row_98	172958	Anaphase-promoting complex subunit CDC26	null	null	4392	0.271349	-0.00938954	Yes
row_99	175877	26S proteasome non-ATPase regulatory subunit 1	null	null	4419	0.269329	-0.00852768	Yes
row_100	183878	Zinc finger, HIT-type	null	null	4441	0.268128	-0.00739049	Yes
row_101	175525	Ribonucleoside-diphosphate reductase small chain	null	null	4495	0.263173	-0.00801541	Yes
row_102	172616	Transcription factor cep-1	null	null	4503	0.262729	-0.0061073	Yes
row_103	176793	ACTin	null	null	4570	0.257136	-0.00744808	Yes
row_104	177657	Polycomb protein mes-6	null	null	4577	0.256678	-0.0054849	Yes
row_105	172967	Probable signal peptidase complex subunit 1	null	null	4587	0.255849	-0.00368692	Yes
row_106	3565561	Uncharacterized protein	null	null	4645	0.251771	-0.00453211	Yes
row_107	173912	Asparagine Linked Glycosylation (ALG) homolog, Nematode	null	null	4687	0.248159	-0.00449624	Yes
row_108	3565921	Serine/threonine-protein kinase chk-1	null	null	4719	0.245404	-0.00390971	Yes
row_109	183628	Actin-Related Proteins	null	null	4731	0.244184	-0.00222186	Yes
row_110	172662	hypothetical protein	null	null	4734	0.244141	-3.8412e-05	Yes
row_111	190051	GCN (yeast General Control Nondrepressible) homolog	null	null	4745	0.243172	0.00170451	Yes
row_112	3896748	pseudo	null	null	4760	0.242433	0.00322716	Yes
row_113	178943	Proteasome subunit alpha type-1	null	null	4765	0.241821	0.00530047	Yes
row_114	172546	Dicer Related Helicase	null	null	4772	0.241538	0.00726365	Yes
row_115	176503	GTP-binding nuclear protein ran-1	null	null	4812	0.238403	0.00740965	Yes
row_116	3565889	Cell-death-Related Nuclease	null	null	4838	0.237073	0.00832658	Yes
row_117	172782	Ubiquitin carboxyl-terminal hydrolase	null	null	4839	0.237063	0.0106202	Yes
row_118	177348	PERMeable eggshell	null	null	4845	0.236715	0.0126384	Yes
row_119	178945	Cell-death-Related Nuclease	null	null	4858	0.236036	0.0142712	Yes
row_120	177336	Dynamin-Related Protein	null	null	4862	0.235664	0.0163996	Yes
row_121	177473	Conserved oligomeric Golgi complex subunit 2	null	null	4876	0.234519	0.0179773	Yes
row_122	172858	Eukaryotic translation initiation factor 3 subunit C	null	null	4878	0.234467	0.0202158	Yes
row_123	176138	Endoribonuclease dcr-1	null	null	4903	0.232247	0.0211878	Yes
row_124	172045	Endonuclease G, mitochondrial	null	null	4932	0.230404	0.0219395	Yes
row_125	176034	CWF19-like protein 2 homolog	null	null	4964	0.2284	0.022526	Yes
row_126	174330	T-complex protein 1 subunit delta	null	null	4973	0.227905	0.0243791	Yes
row_127	176379	Regulator of microtubule dynamics protein 1	null	null	4986	0.227224	0.0260119	Yes
row_128	174379	60S ribosomal protein L26	null	null	4990	0.226771	0.0281403	Yes
row_129	179509	hypothetical protein	null	null	5081	0.220211	0.0254779	Yes
row_130	174425	SET (trithorax/polycomb) domain containing	null	null	5138	0.216921	0.0246878	Yes
row_131	172901	40S ribosomal protein S7	null	null	5154	0.216053	0.0261554	Yes
row_132	176718	Ubiquitin	null	null	5178	0.21441	0.0271824	Yes
row_133	172902	Ribosomal RNA-processing protein 7 homolog	null	null	5212	0.211728	0.0276588	Yes
row_134	179537	Eukaryotic Release FActor homolog	null	null	5224	0.211259	0.0293467	Yes
row_135	179971	Heat shock protein 90	null	null	5228	0.21105	0.031475	Yes
row_136	172801	Probable histone-binding protein rba-1	null	null	5245	0.209734	0.0328876	Yes
row_137	179800	High Incidence of Males (increased X chromosome loss)	null	null	5277	0.207825	0.0334741	Yes
row_138	175628	40S ribosomal protein SA	null	null	5303	0.20587	0.034391	Yes
row_139	174421	T-complex protein 1 subunit beta	null	null	5308	0.205688	0.0364643	Yes
row_140	176146	60S ribosomal protein L21	null	null	5332	0.204308	0.0374914	Yes
row_141	174698	Anaphase-promoting complex subunit 1	null	null	5374	0.201507	0.0375273	Yes
row_142	175413	Ubiquitin-like protein 1	null	null	5393	0.200508	0.0388296	Yes
row_143	176143	Serine/threonine-protein kinase plk-1	null	null	5413	0.199141	0.040077	Yes
row_144	173260	40S ribosomal protein S6	null	null	5436	0.197572	0.0411591	Yes
row_145	176978	Proteasome subunit beta type	null	null	5441	0.197203	0.0432324	Yes
row_146	186242	Ras activating factor in development Of Germline	null	null	5445	0.196711	0.0453608	Yes
row_147	173072	NEDD8-conjugating enzyme ubc-12	null	null	5464	0.195638	0.0466632	Yes
row_148	172234	Nuclear Pore complex Protein	null	null	5484	0.194293	0.0479105	Yes
row_149	177503	40S ribosomal protein S8	null	null	5513	0.193228	0.0486622	Yes
row_150	171692	60S ribosomal protein L17	null	null	5517	0.193155	0.0507906	Yes
row_151	175853	CYtoKinesis defect	null	null	5574	0.190326	0.0500005	Yes
row_152	176968	Cell death abnormality protein 2	null	null	5576	0.190155	0.052239	Yes
row_153	172074	60S ribosomal protein L4	null	null	5590	0.189432	0.0538167	Yes
row_154	179998	40S ribosomal protein S16	null	null	5596	0.189226	0.055835	Yes
row_155	172805	40S ribosomal protein S19	null	null	5598	0.189202	0.0580735	Yes
row_156	173342	40S ribosomal protein S26	null	null	5631	0.186899	0.0586049	Yes
row_157	175584	40S ribosomal protein S3a	null	null	5641	0.186225	0.0604029	Yes
row_158	175861	Glycylpeptide N-tetradecanoyltransferase	null	null	5665	0.184908	0.06143	Yes
row_159	172061	Ribosomal Protein, Small subunit	null	null	5689	0.183624	0.062457	Yes
row_160	174090	Transcription factor BTF3 homolog	null	null	5727	0.181449	0.0627132	Yes
row_161	178012	40S ribosomal protein S5	null	null	5746	0.180657	0.0640156	Yes
row_162	172943	60S acidic ribosomal protein P0	null	null	5757	0.18036	0.0657585	Yes
row_163	179781	hypothetical protein	null	null	5797	0.177939	0.0659045	Yes
row_164	172584	Eukaryotic translation initiation factor 2 subunit 2	null	null	5821	0.176898	0.0669315	Yes
row_165	176975	40S ribosomal protein S28	null	null	5838	0.176138	0.0683441	Yes
row_166	171949	60S ribosomal protein L13	null	null	5845	0.175697	0.0703072	Yes
row_167	185707	SLY1 homolog	null	null	5848	0.175355	0.0724907	Yes
row_168	177976	Uncharacterized protein	null	null	5875	0.173395	0.0733525	Yes
row_169	179824	Histone-lysine N-methyltransferase mes-4	null	null	5894	0.172525	0.0746549	Yes
row_170	178279	60S ribosomal protein L12	null	null	5895	0.172516	0.0769485	Yes
row_171	175501	60S ribosomal protein L3	null	null	5902	0.17236	0.0789117	Yes
row_172	175975	Elongation factor 1-alpha	null	null	5903	0.172302	0.0812053	Yes
row_173	174313	Putative pachytene checkpoint protein 2	null	null	5907	0.172063	0.0833336	Yes
row_174	172320	LiPid Depleted	null	null	5923	0.171461	0.0848012	Yes
row_175	176097	60S ribosomal protein L35	null	null	5930	0.171182	0.0867644	Yes
row_176	176015	60S ribosomal protein L6	null	null	5932	0.171092	0.0890029	Yes
row_177	175879	40S ribosomal protein S3	null	null	5935	0.170939	0.0911864	Yes
row_178	187602	Putative RNA-binding protein R05D3.8	null	null	5981	0.168698	0.091002	Yes
row_179	171853	60S ribosomal protein L10a	null	null	5982	0.168697	0.0932956	Yes
row_180	178083	Ribosomal Protein, Small subunit	null	null	6015	0.166259	0.093827	Yes
row_181	172338	Poly(A) RNA polymerase gld-2	null	null	6017	0.166158	0.0960655	Yes
row_182	177243	Cytochrome c 2.1	null	null	6020	0.166006	0.098249	Yes
row_183	176891	60S ribosomal protein L15	null	null	6038	0.165165	0.0996064	Yes
row_184	173309	Ribosomal Protein, Small subunit	null	null	6043	0.164873	0.10168	Yes
row_185	176608	MoRTal germline	null	null	6045	0.164743	0.103918	Yes
row_186	173235	60S ribosomal protein L31	null	null	6047	0.164612	0.106157	Yes
row_187	174285	Putative histone deacetylase 2	null	null	6058	0.163986	0.1079	Yes
row_188	178188	40S ribosomal protein S23	null	null	6126	0.160154	0.106504	Yes
row_189	175378	Mediator of RNA polymerase II transcription subunit 19	null	null	6135	0.159462	0.108357	Yes
row_190	176877	Maternal embryonic leucine zipper kinase	null	null	6136	0.159382	0.11065	Yes
row_191	172693	40S ribosomal protein S15	null	null	6138	0.159338	0.112889	Yes
row_192	175638	Homeobox protein pal-1	null	null	6164	0.157889	0.113806	Yes
row_193	183737	hypothetical protein	null	null	6171	0.157421	0.115769	Yes
row_194	179153	60S ribosomal protein L39	null	null	6181	0.156796	0.117567	Yes
row_195	173214	Probable lysine-specific histone demethylase 1	null	null	6241	0.153268	0.116612	Yes
row_196	176334	Aspartate--tRNA ligase, cytoplasmic	null	null	6288	0.150963	0.116372	Yes
row_197	172594	Receptor Mediated Endocytosis	null	null	6342	0.148055	0.115747	Yes
row_198	176183	Histone-lysine N-methyltransferase met-2	null	null	6344	0.147905	0.117986	Yes
row_199	177583	40S ribosomal protein S2	null	null	6379	0.146251	0.118407	Yes
row_200	176301	Ribonucleoside-diphosphate reductase large subunit	null	null	6382	0.14617	0.120591	Yes
row_201	173920	Probable pre-mRNA-splicing factor ATP-dependent RNA helicase mog-5	null	null	6396	0.145649	0.122168	Yes
row_202	174210	BTB and MATH domain containing	null	null	6403	0.145369	0.124132	Yes
row_203	3565767	SUMO-conjugating enzyme UBC9	null	null	6409	0.145046	0.12615	Yes
row_204	178487	Peptidyl-prolyl cis-trans isomerase	null	null	6415	0.144783	0.128168	Yes
row_205	189618	Probable 28S ribosomal protein S10, mitochondrial	null	null	6427	0.144083	0.129856	Yes
row_206	172313	40S ribosomal protein S17	null	null	6455	0.142466	0.130663	Yes
row_207	174052	hypothetical protein	null	null	6460	0.142219	0.132736	Yes
row_208	178342	60S ribosomal protein L18	null	null	6482	0.141237	0.133873	Yes
row_209	174699	40S ribosomal protein S9	null	null	6513	0.139937	0.134515	Yes
row_210	179274	Germinal Center Kinase family	null	null	6527	0.13918	0.136093	Yes
row_211	172748	Phospholipid-transporting ATPase	null	null	6547	0.13808	0.13734	Yes
row_212	175686	hypothetical protein	null	null	6554	0.137687	0.139303	Yes
row_213	176668	Probable small nuclear ribonucleoprotein E	null	null	6581	0.13618	0.140165	Yes
row_214	173134	ATP synthase subunit alpha, mitochondrial	null	null	6584	0.136072	0.142348	Yes
row_215	175545	Mitogen-activated protein kinase mpk-1	null	null	6586	0.135949	0.144587	Yes
row_216	172833	E3 ubiquitin-protein ligase hrd-like protein 1	null	null	6616	0.134473	0.145283	Yes
row_217	178289	COP-9 SigNalosome subunit	null	null	6626	0.133898	0.147081	Yes
row_218	179358	RING-box protein 1	null	null	6638	0.133262	0.148769	Yes
row_219	175588	Chaperonin Containing TCP-1	null	null	6639	0.133235	0.151063	Yes
row_220	176815	CYtoKinesis defect	null	null	6641	0.13312	0.153301	Yes
row_221	178662	hypothetical protein	null	null	6645	0.132974	0.15543	Yes
row_222	174459	Exocyst complex component 2	null	null	6666	0.13176	0.156622	Yes
row_223	178483	Small nuclear ribonucleoprotein Sm D3	null	null	6674	0.131436	0.15853	Yes
row_224	174318	T-complex protein 1 subunit alpha	null	null	6685	0.130704	0.160273	Yes
row_225	175972	Probable 26S proteasome regulatory subunit rpn-6.1	null	null	6752	0.127397	0.158932	Yes
row_226	174322	Initiation Factor 4G (eIF4G) family	null	null	6753	0.127354	0.161226	Yes
row_227	174177	hypothetical protein	null	null	6760	0.127145	0.163189	Yes
row_228	173334	Proteasome subunit beta type	null	null	6765	0.12675	0.165262	Yes
row_229	172201	60S ribosomal protein L19	null	null	6789	0.125243	0.166289	Yes
row_230	174329	Guanine nucleotide-binding protein-like 3 homolog	null	null	6809	0.123562	0.167537	Yes
row_231	176133	Probable signal peptidase complex subunit 3	null	null	6835	0.122459	0.168454	Yes
row_232	171821	Cysteinyl Amino-acyl tRNA Synthetase	null	null	6882	0.118872	0.168214	Yes
row_233	179611	Putative syntaxin-5	null	null	6887	0.118484	0.170288	Yes
row_234	175900	THO Complex (transcription factor/nuclear export) subunit	null	null	6908	0.117432	0.17148	Yes
row_235	172350	Kinetochore null protein 2	null	null	6918	0.116734	0.173278	Yes
row_236	175716	ATP synthase subunit beta, mitochondrial	null	null	6973	0.114327	0.172598	Yes
row_237	176024	Prolyl Amino-acyl tRNA Synthetase	null	null	7029	0.111246	0.171863	Yes
row_238	178670	Chaperonin Containing TCP-1	null	null	7126	0.106359	0.16887	Yes
row_239	171917	Flap endonuclease 1	null	null	7135	0.10599	0.170723	Yes
row_240	3565980	hypothetical protein	null	null	7146	0.105277	0.172466	Yes
row_241	260040	Succinate dehydrogenase cytochrome b560 subunit, mitochondrial	null	null	7151	0.104994	0.174539	Yes
row_242	180317	yeast SEC homolog	null	null	7196	0.102549	0.17441	Yes
row_243	174042	Protein EFR3 homolog	null	null	7203	0.102199	0.176373	Yes
row_244	3565776	Apoptosis regulator ced-9	null	null	7205	0.102151	0.178612	Yes
row_245	175221	ORAI (store-operated calcium channel) homolog	null	null	7296	0.0971156	0.175949	Yes
row_246	177249	Uncharacterized protein	null	null	7368	0.0933508	0.174333	Yes
row_247	190399	Sorting NeXin	null	null	7411	0.0902587	0.174314	Yes
row_248	176784	hypothetical protein	null	null	7483	0.0859612	0.172698	Yes
row_249	172743	Elongation factor 2	null	null	7508	0.0848913	0.17367	Yes
row_250	246008	Polyadenylation and cleavage factor homolog 11	null	null	7524	0.0838872	0.175137	Yes
row_251	173459	hypothetical protein	null	null	7531	0.0833163	0.177101	Yes
row_252	176103	Probable small nuclear ribonucleoprotein F	null	null	7537	0.0830119	0.179119	Yes
row_253	172959	Eukaryotic translation initiation factor 3 subunit E	null	null	7629	0.0769763	0.176401	Yes
row_254	176635	Worm AIF (apoptosis inducing factor) Homolog	null	null	7685	0.0738807	0.175666	Yes
row_255	176702	human MRG (Mortality factor-Related Gene) related	null	null	7692	0.0732238	0.177629	Yes
row_256	172468	Mitotic checkpoint serine/threonine-protein kinase bub-1	null	null	7698	0.0728368	0.179648	Yes
row_257	174388	E3 ubiquitin-protein ligase etc-1	null	null	7739	0.0708756	0.179739	Yes
row_258	179779	Eukaryotic translation initiation factor 3 subunit K	null	null	7754	0.0701849	0.181261	Yes
row_259	177891	Coatomer subunit gamma	null	null	7787	0.0688135	0.181793	Yes
row_260	179853	LiPIN (mammalian lipodystrophy associated) homolog	null	null	7801	0.0681039	0.183371	Yes
row_261	178006	Ubiquitin-conjugating enzyme E2 2	null	null	7804	0.067955	0.185554	Yes
row_262	175138	Eukaryotic translation initiation factor 3 subunit B	null	null	7809	0.0676061	0.187627	Yes
row_263	172123	Maternal Effect Sterile	null	null	7818	0.0672919	0.18948	Yes
row_264	189590	related to yeast Vacuolar Protein Sorting factor	null	null	7885	0.0641004	0.18814	Yes
row_265	183241	hypothetical protein	null	null	7949	0.0610612	0.186964	Yes
row_266	180536	Cell death-related nuclease 4	null	null	7964	0.0601205	0.188487	Yes
row_267	179193	SNAP (Soluble NSF Attachment Protein) homolog	null	null	7994	0.0584051	0.189183	Yes
row_268	176072	Pescadillo homolog	null	null	8030	0.056457	0.18955	Yes
row_269	171872	Dual specificity mitogen-activated protein kinase kinase mek-2	null	null	8041	0.0557001	0.191292	Yes
row_270	179639	Probable small nuclear ribonucleoprotein Sm D2	null	null	8079	0.0536576	0.191549	Yes
row_271	172249	Retinoblastoma-like protein homolog lin-35	null	null	8084	0.0533594	0.193622	Yes
row_272	175571	SNF chromatin remodeling Complex component	null	null	8130	0.0505703	0.193438	Yes
row_273	172174	Ezrin/Radixin/Moesin	null	null	8145	0.0497959	0.19496	Yes
row_274	266853	Eukaryotic Initiation Factor	null	null	8179	0.047971	0.195437	Yes
row_275	173518	Conserved Oligomeric Golgi (COG) Component	null	null	8190	0.0472902	0.197179	Yes
row_276	176506	HP1 Like (heterochromatin protein)	null	null	8216	0.0457742	0.198096	Yes
row_277	259584	Signal recognition particle 54 kDa protein	null	null	8282	0.042173	0.196811	Yes
row_278	175772	Cytochrome b-c1 complex subunit 1, mitochondrial	null	null	8328	0.0399179	0.196626	Yes
row_279	175572	RNA-binding protein 8A	null	null	8334	0.0395689	0.198645	Yes
row_280	179025	ATP synthase subunit	null	null	8469	0.0316614	0.193559	Yes
row_281	175643	Cell death protein 4	null	null	8479	0.0309896	0.195357	Yes
row_282	172802	Probable histone-binding protein lin-53	null	null	8483	0.0307717	0.197486	Yes
row_283	179458	Poly-A Polymerase	null	null	8526	0.0280487	0.197466	Yes
row_284	173231	Arf-1 Guanine nucleotide Exchange Factor homolog	null	null	8538	0.0274762	0.199154	Yes
row_285	3565661	hypothetical protein	null	null	8547	0.0265806	0.201007	Yes
row_286	177521	Histone H2A	null	null	8582	0.0246805	0.201429	Yes
row_287	172184	PIP Kinase	null	null	8596	0.0234998	0.203006	Yes
row_288	3564970	V-type proton ATPase catalytic subunit A	null	null	8638	0.0211845	0.203042	Yes
row_289	172981	Forkhead box protein O	null	null	8662	0.01967	0.204069	Yes
row_290	174272	Vacuolar H ATPase	null	null	8679	0.0185258	0.205482	Yes
row_291	176328	SR Protein Kinase	null	null	8681	0.0184091	0.20772	Yes
row_292	172370	Dolichyl-diphosphooligosaccharide--protein glycosyltransferase subunit dad-1	null	null	8738	0.0148482	0.20693	Yes
row_293	176666	Phospholipid-transporting ATPase tat-1	null	null	8784	0.0121998	0.206746	Yes
row_294	177084	Enhancer of EfL-1 mutant phenotype	null	null	8827	0.00938141	0.206727	Yes
row_295	176383	V-type proton ATPase 16 kDa proteolipid subunit 1	null	null	8843	0.0081585	0.208194	Yes
row_296	172910	NEDD8	null	null	8894	0.0051923	0.207734	Yes
row_297	171935	RAB family	null	null	8899	0.00493715	0.209808	Yes
row_298	172195	ATP synthase subunit	null	null	8907	0.00442258	0.211716	Yes
row_299	174268	Dolichyl-diphosphooligosaccharide--protein glycosyltransferase 48 kDa subunit	null	null	8922	0.00390606	0.213239	Yes
row_300	177161	Proliferating cell nuclear antigen	null	null	8979	0.000351957	0.212448	Yes
row_301	176434	Probable clathrin heavy chain 1	null	null	8985	-9.36e-05	0.214467	Yes
row_302	171807	ABC Transporter, Mitochondrial	null	null	8986	-0.000116759	0.21676	Yes
row_303	3564936	Inhibitor of growth protein	null	null	8990	-0.000462575	0.218889	Yes
row_304	3565610	NA	null	null	9002	-0.00121954	0.220576	Yes
row_305	176180	E3 ubiquitin-protein ligase bre-1	null	null	9017	-0.0023337	0.222099	Yes
row_306	180047	LSM Sm-like protein	null	null	9024	-0.00316223	0.224062	Yes
row_307	189639	Bis(5'-nucleosyl)-tetraphosphatase [asymmetrical]	null	null	9045	-0.00457776	0.225255	Yes
row_308	266837	hypothetical protein	null	null	9090	-0.00697564	0.225125	Yes
row_309	182581	hypothetical protein	null	null	9125	-0.00981824	0.225547	Yes
row_310	171834	Probable small nuclear ribonucleoprotein G	null	null	9126	-0.00982676	0.22784	Yes
row_311	174333	Spliceosome RNA helicase DDX39B homolog	null	null	9131	-0.0105685	0.229913	Yes
row_312	179948	Kinesin-like protein	null	null	9200	-0.0148736	0.228463	Yes
row_313	176548	Sex-determining transformer protein 1	null	null	9213	-0.0157812	0.230095	Yes
row_314	176957	Protein SEC13 homolog	null	null	9240	-0.017711	0.230957	Yes
row_315	179959	Histone deacetylase 1	null	null	9272	-0.020203	0.231544	Yes
row_316	176466	Cullin-1	null	null	9359	-0.0267467	0.229102	Yes
row_317	175474	WD repeat-containing protein wdr-5.1	null	null	9371	-0.0277891	0.230789	Yes
row_318	174596	Probable V-type proton ATPase subunit F	null	null	9390	-0.0291556	0.232092	Yes
row_319	172088	Rho-associated protein kinase let-502	null	null	9442	-0.03279	0.231577	Yes
row_320	171601	Ras-related protein rab-11.1	null	null	9452	-0.0334202	0.233375	Yes
row_321	179601	APoptosis Enhancer	null	null	9455	-0.0335701	0.235559	Yes
row_322	176338	V-type proton ATPase subunit D	null	null	9467	-0.0344065	0.237246	Yes
row_323	176625	CCR4-NOT transcription complex subunit 7	null	null	9525	-0.0394368	0.236401	Yes
row_324	175750	Probable serine/threonine-protein phosphatase PP2A regulatory subunit	null	null	9531	-0.0398471	0.238419	Yes
row_325	266842	Vesicle-fusing ATPase	null	null	9535	-0.0401132	0.240548	Yes
row_326	180692	Probable V-type proton ATPase subunit B	null	null	9594	-0.0447767	0.239648	Yes
row_327	178074	MOG interacting and ectopic P-granules protein 1	null	null	9641	-0.0473703	0.239408	Yes
row_328	177497	F-actin-capping protein subunit alpha	null	null	9673	-0.0493597	0.239995	Yes
row_329	174286	SWI/SNF nucleosome remodeling complex component	null	null	9721	-0.0525003	0.2397	Yes
row_330	177285	TachyKinin Receptor family	null	null	9737	-0.0533343	0.241168	Yes
row_331	172026	Histone-lysine N-methyltransferase	null	null	9753	-0.0545148	0.242635	Yes
row_332	175840	UBiQuitin	null	null	9782	-0.0571526	0.243387	Yes
row_333	177017	V-type proton ATPase subunit C	null	null	9798	-0.058795	0.244855	Yes
row_334	173277	human TFG related	null	null	9809	-0.0599106	0.246597	Yes
row_335	172755	RAB family	null	null	9817	-0.0607623	0.248506	Yes
row_336	177103	Vacuolar H ATPase	null	null	9902	-0.066485	0.246174	Yes
row_337	173401	ELAV-Type RNA binding-protein family	null	null	9934	-0.0686347	0.24676	Yes
row_338	177757	V-type proton ATPase subunit e	null	null	9964	-0.0705651	0.247457	Yes
row_339	178620	RAB family	null	null	9974	-0.0711787	0.249255	Yes
row_340	174076	Target Of ERK kinase MPK-1	null	null	10020	-0.0740061	0.24907	Yes
row_341	191694	Innexin	null	null	10025	-0.0742798	0.251144	Yes
row_342	176257	Probable V-type proton ATPase 116 kDa subunit a	null	null	10062	-0.0768068	0.251455	Yes
row_343	175918	Histone-lysine N-methyltransferase set-1	null	null	10078	-0.0779263	0.252922	Yes
row_344	176089	Probable dolichyl-diphosphooligosaccharide--protein glycosyltransferase subunit 3	null	null	10115	-0.0801597	0.253234	Yes
row_345	189783	SP (Specificity Protein) Transcription Factor	null	null	10127	-0.0806192	0.254922	Yes
row_346	176512	Calcium-transporting ATPase	null	null	10142	-0.0816374	0.256444	Yes
row_347	172077	Transcriptional regulator ATRX homolog	null	null	10178	-0.0838423	0.25681	Yes
row_348	173073	Protein mago nashi homolog	null	null	10219	-0.0869065	0.256901	Yes
row_349	184409	Mitochondrial fission 1 protein	null	null	10236	-0.0879847	0.258314	Yes
row_350	175524	Casein kinase I isoform alpha	null	null	10279	-0.0913237	0.258295	Yes
row_351	176773	Adenine Nucleotide Translocator	null	null	10314	-0.0938658	0.258716	Yes
row_352	174659	Histone RNA hairpin-binding protein	null	null	10363	-0.0974474	0.258366	Yes
row_353	175662	Histone-lysine N-methyltransferase set-2	null	null	10384	-0.0993372	0.259559	Yes
row_354	172216	Probable V-type proton ATPase subunit G	null	null	10507	-0.108326	0.255134	No
row_355	181174	Deoxyribonuclease-2	null	null	10538	-0.110357	0.255776	No
row_356	172775	Skp1-related protein	null	null	10663	-0.118583	0.251241	No
row_357	185424	hypothetical protein	null	null	10671	-0.119145	0.253149	No
row_358	175383	Matrix metalloproteinase-B	null	null	10672	-0.119174	0.255443	No
row_359	176609	hypothetical protein	null	null	10680	-0.11963	0.257351	No
row_360	172831	Tubulin alpha chain	null	null	10778	-0.125665	0.254303	No
row_361	172127	Paralysed Arrest at Two-fold	null	null	10825	-0.129117	0.254064	No
row_362	171691	AdaPtin, Small chain (clathrin associated complex)	null	null	10911	-0.135446	0.251677	No
row_363	175922	Dynein light chain 1, cytoplasmic	null	null	10931	-0.137356	0.252924	No
row_364	177610	Mitogen-activated protein kinase pmk-3	null	null	10958	-0.139774	0.253786	No
row_365	175376	AP complex subunit beta	null	null	11002	-0.143007	0.253712	No
row_366	174586	1-phosphatidylinositol 4,5-bisphosphate phosphodiesterase gamma plc-3	null	null	11035	-0.145261	0.254243	No
row_367	180468	Sorting NeXin	null	null	11154	-0.152658	0.250039	No
row_368	179943	Programmed cell death activator egl-1	null	null	11235	-0.158702	0.247927	No
row_369	3565337	hypothetical protein	null	null	11236	-0.158714	0.250221	No
row_370	178101	Innexin-8	null	null	11260	-0.160288	0.251248	No
row_371	175801	ADP-ribosylation factor 1-like 2	null	null	11268	-0.160797	0.253156	No
row_372	259744	SERotonin/octopamine receptor family	null	null	11315	-0.164004	0.252916	No
row_373	185681	Putative protein-tyrosine sulfotransferase	null	null	11641	-0.186881	0.237314	No
row_374	180359	HIF (Hypoxia Inducible Factor) homologa	null	null	11748	-0.194293	0.23377	No
row_375	180800	Vacuolar protein sorting-associated protein 41 homolog	null	null	11793	-0.197789	0.233641	No
row_376	175504	Integrin beta pat-3	null	null	11807	-0.198424	0.235218	No
row_377	180461	Guanine nucleotide exchange factor rei-2	null	null	11853	-0.201805	0.235034	No
row_378	176430	Transmembrane cell adhesion receptor mua-3	null	null	11914	-0.205632	0.234024	No
row_379	3564940	Nematode Specific Peptide family, group B	null	null	12113	-0.218057	0.225414	No
row_380	172895	hypothetical protein	null	null	12165	-0.221453	0.224899	No
row_381	176316	Cell death-related nuclease 6	null	null	12228	-0.225899	0.223779	No
row_382	178950	hypothetical protein	null	null	12263	-0.227766	0.2242	No
row_383	178614	CalMoDulin	null	null	12328	-0.232437	0.22297	No
row_384	175817	Mediator of RNA polymerase II transcription subunit 15	null	null	12471	-0.243086	0.217444	No
row_385	173086	human HnRNP A1 homolog	null	null	12549	-0.247324	0.215497	No
row_386	173365	Cell death specification protein 2	null	null	12657	-0.255714	0.211899	No
row_387	181723	Histone deacetylase 4	null	null	12759	-0.262119	0.208631	No
row_388	176380	Protein cbp-1	null	null	12908	-0.272299	0.202774	No
row_389	181450	HP1 Like (heterochromatin protein)	null	null	13098	-0.283397	0.194661	No
row_390	187537	Glutathione S-Transferase	null	null	13102	-0.283521	0.196789	No
row_391	181369	Lysine-Specific histone Demethylase homolog	null	null	13135	-0.284922	0.19732	No
row_392	176295	NHL (ring finger b-box coiled coil) domain containing	null	null	13169	-0.287181	0.197797	No
row_393	180767	Actin-4	null	null	13255	-0.293698	0.19541	No
row_394	176288	Protein ced-11	null	null	13332	-0.298861	0.193518	No
row_395	181644	Dynamin	null	null	13352	-0.300328	0.194766	No
row_396	186903	C-type LECtin	null	null	13553	-0.314314	0.186046	No
row_397	187826	Prion-like-(Q/N-rich)-domain-bearing protein	null	null	13564	-0.314622	0.187789	No
row_398	176060	Transmembrane matrix receptor MUP-4	null	null	13772	-0.327324	0.178684	No
row_399	190493	Putative T-box protein 33	null	null	13832	-0.332375	0.177728	No
row_400	174874	Polycomb protein sop-2	null	null	13889	-0.336357	0.176938	No
row_401	181759	Ras-related protein Rab-6.2	null	null	13973	-0.342299	0.174661	No
row_402	179259	E3 ubiquitin-protein ligase rpm-1	null	null	13985	-0.343364	0.176349	No
row_403	181261	Tyrosine-protein kinase abl-1	null	null	14069	-0.349191	0.174072	No
row_404	189606	human TORsin related	null	null	14079	-0.350028	0.17587	No
row_405	179798	Dynein Heavy Chain	null	null	14334	-0.367953	0.164177	No
row_406	181179	hypothetical protein	null	null	14540	-0.382687	0.155182	No
row_407	181053	NIP3 homolog	null	null	14674	-0.39174	0.150152	No
row_408	178919	Homeobox protein ceh-34	null	null	14925	-0.408425	0.138679	No
row_409	172715	Fatty Acid SyNthase	null	null	14964	-0.411541	0.13888	No
row_410	179045	Daf-12, REdundant with	null	null	14984	-0.412477	0.140127	No
row_411	180115	Nuclear Hormone Receptor family	null	null	15055	-0.416731	0.138566	No
row_412	171849	Protein pop-1	null	null	15209	-0.427948	0.132435	No
row_413	181557	hypothetical protein	null	null	15465	-0.449848	0.120687	No
row_414	173293	Eyes absent homolog	null	null	15575	-0.458644	0.116978	No
row_415	191620	Homeobox protein ceh-30	null	null	15891	-0.490263	0.101926	No
row_416	184190	Cell death abnormality protein 8	null	null	15929	-0.494203	0.102182	No
row_417	181197	Homeobox protein vab-15	null	null	16017	-0.504288	0.0996847	No
row_418	179152	GRound-Like (grd related)	null	null	16241	-0.529167	0.0896985	No
row_419	178365	NOmpA Homolog (Drosophila nompA: no mechanoreceptor potential A)	null	null	16349	-0.542615	0.0861	No
row_420	181588	hypothetical protein	null	null	16534	-0.568256	0.0782615	No
row_421	188569	pseudo	null	null	16583	-0.573871	0.0779119	No
row_422	177956	Laminin-like protein epi-1	null	null	16615	-0.579105	0.0784984	No
row_423	175279	Ligand-Gated ion Channel	null	null	16916	-0.634568	0.0642722	No
row_424	181432	Nuclear hormone receptor family member nhr-25	null	null	16988	-0.650426	0.062656	No
row_425	185483	Nuclear Hormone Receptor family	null	null	16998	-0.652993	0.064454	No
row_426	174545	hypothetical protein	null	null	17169	-0.703741	0.0573864	No
row_427	171778	Uterine Lumin Expressed/locailized	null	null	17357	-0.765081	0.0493826	No
row_428	181545	Histone H1.1	null	null	17474	-0.81367	0.0452885	No
row_429	178840	SKp1 Related (ubiquitin ligase complex component)	null	null	17649	-0.89357	0.0380006	No
row_430	184868	hypothetical protein	null	null	17820	-0.990902	0.0309329	No
row_431	185445	Nematode Specific Peptide family, group B	null	null	17853	-1.01459	0.0314644	No
row_432	187293	hypothetical protein	null	null	17945	-1.06914	0.028747	No
row_433	178689	C-type LECtin	null	null	18147	-1.2298	0.0199722	No
row_434	185120	UDP-GlucuronosylTransferase	null	null	18351	-1.57817	0.0110874	No
row_435	174925	hypothetical protein	null	null	18499	-2.18424	0.00528628	No
NAME	CELL_COMMUNICATION(4)	NA	GENE SYMBOL	GENE_TITLE	RANK IN GENE LIST	RANK METRIC SCORE	RUNNING ES	CORE ENRICHMENT
row_0	191738	Overexpression Longevity Determinant	null	null	6	3.87186	0.00194226	No
row_1	178903	Activated in Blocked Unfolded protein response	null	null	7	3.826	0.00421499	No
row_2	188824	Serpentine Receptor, class BC (class B-like)	null	null	24	3.20412	0.00560646	No
row_3	181800	Activated in Blocked Unfolded protein response	null	null	32	3.06687	0.00749364	No
row_4	191609	ADP-ribosylation factor 1-like 1	null	null	37	2.92918	0.00954605	No
row_5	179287	NA	null	null	235	1.54423	0.000968375	No
row_6	177844	Major sperm protein 77/79	null	null	607	1.13631	-0.0171929	No
row_7	182139	Activated in Blocked Unfolded protein response	null	null	1221	0.834457	-0.0486831	No
row_8	178873	Heat shock 70 kDa protein F, mitochondrial	null	null	1373	0.773644	-0.0547272	No
row_9	191661	GRounDhog (hedgehog-like family)	null	null	1460	0.74125	-0.0571912	No
row_10	175316	Chaperonin homolog Hsp-60, mitochondrial	null	null	1596	0.697278	-0.062354	No
row_11	174197	PUF (Pumilio/FBF) domain-containing	null	null	2177	0.548309	-0.0920267	No
row_12	181198	Probable galaptin lec-8	null	null	2276	0.526088	-0.0951516	No
row_13	172017	Presenilin hop-1	null	null	2426	0.505855	-0.101086	No
row_14	178001	Protein lin-3	null	null	2574	0.479695	-0.106909	No
row_15	175717	Protein arginine N-methyltransferase 5	null	null	2584	0.477327	-0.105132	No
row_16	171938	MSH (MutS Homolog) family	null	null	2679	0.460876	-0.108037	No
row_17	171915	human SPG (spastic paraplegia)	null	null	2766	0.446173	-0.110501	No
row_18	177647	Putative syntaxin-4	null	null	3077	0.399078	-0.125302	No
row_19	171939	human HUS1 related	null	null	3091	0.39781	-0.123746	No
row_20	182509	Mtor (MTOR) associated protein, LST8 homolog	null	null	3095	0.397543	-0.121638	No
row_21	176754	Aspergillus NUclear Division related	null	null	3147	0.389334	-0.122174	No
row_22	174624	Transitional endoplasmic reticulum ATPase homolog 1	null	null	3258	0.375169	-0.12596	No
row_23	179922	Activating Transcription Factor associated with Stress	null	null	3274	0.373087	-0.124514	No
row_24	174034	Mitochondrial prohibitin complex protein 2	null	null	3330	0.366537	-0.12527	No
row_25	183841	URI (Unconventional prefoldin RPB5 Interactor) homolog	null	null	3335	0.365528	-0.123218	No
row_26	172519	C2 domain-containing protein aex-1	null	null	3367	0.361842	-0.122653	No
row_27	176118	Adenylate kinase	null	null	3402	0.358686	-0.122253	No
row_28	173085	Kinase suppressor of Ras B	null	null	3484	0.349702	-0.124441	No
row_29	175629	RaB GAP related	null	null	3634	0.334905	-0.130375	No
row_30	180049	Ataxin-3 homolog	null	null	3647	0.333044	-0.128763	No
row_31	182136	Activated in Blocked Unfolded protein response	null	null	3659	0.331881	-0.127096	No
row_32	176019	Heat Shock Protein	null	null	3666	0.331415	-0.125154	No
row_33	172141	phosphoinositide kinase AdAPter subunit	null	null	3678	0.330585	-0.123487	No
row_34	178759	Anterior Pharynx in eXcess	null	null	3741	0.324395	-0.124629	No
row_35	172747	Gamma-secretase subunit aph-1	null	null	3915	0.308296	-0.131885	No
row_36	174004	Serine/threonine-protein kinase VRK1	null	null	3928	0.306955	-0.130273	No
row_37	176757	MTM (myotubularin) family	null	null	4104	0.29245	-0.137639	No
row_38	172554	Aspergillus NUclear Division related	null	null	4159	0.286239	-0.138341	No
row_39	175885	GEN1 Holliday junction resolvase homolog	null	null	4172	0.285407	-0.136729	No
row_40	174309	Transitional endoplasmic reticulum ATPase homolog 2	null	null	4174	0.285331	-0.134512	No
row_41	179388	RuvB-like 1	null	null	4179	0.28523	-0.132459	No
row_42	177914	Uncharacterized protein	null	null	4243	0.281661	-0.133656	No
row_43	183197	Sphingosine kinase 1	null	null	4357	0.273259	-0.137607	No
row_44	174203	Heat Shock Protein	null	null	4383	0.271779	-0.136712	No
row_45	172616	Transcription factor cep-1	null	null	4503	0.262729	-0.140993	No
row_46	174587	hypothetical protein	null	null	4521	0.261506	-0.139657	No
row_47	172890	Cell death abnormality protein 12	null	null	4536	0.260717	-0.138155	No
row_48	3565400	Non-specific serine/threonine protein kinase	null	null	4670	0.249727	-0.143208	No
row_49	178904	Activated in Blocked Unfolded protein response	null	null	4673	0.249522	-0.141045	No
row_50	172758	UDP-Glucose Glycoprotein glucosylTransferase	null	null	4706	0.246461	-0.140535	No
row_51	176224	Huntington interacting protein related 1	null	null	5043	0.222748	-0.156769	No
row_52	176381	Ubiquitin carboxyl-terminal hydrolase 46	null	null	5048	0.222448	-0.154716	No
row_53	172041	Dynein Heavy Chain	null	null	5109	0.218588	-0.155748	No
row_54	172939	Nucleoside diphosphate kinase	null	null	5196	0.213383	-0.158212	No
row_55	178084	RAs-related GTP binding protein C homolog	null	null	5221	0.211395	-0.157261	No
row_56	172264	Signal transducing adapter molecule 1	null	null	5295	0.206327	-0.159009	No
row_57	177436	Raf homolog serine/threonine-protein kinase	null	null	5297	0.206243	-0.156792	No
row_58	179894	hypothetical protein	null	null	5299	0.206154	-0.154574	No
row_59	172455	CARMIL (Capping, ARp2/3, Myosin I Linker protein) homolog	null	null	5466	0.195487	-0.161444	No
row_60	191704	Lateral-signal-Induced Phosphatase	null	null	5504	0.193453	-0.161209	No
row_61	3565237	Suppressor of aph-1	null	null	5534	0.192173	-0.160534	No
row_62	175565	Choline kinase B2	null	null	5551	0.191368	-0.159142	No
row_63	174305	IRE1 kinase related	null	null	5575	0.19016	-0.158137	No
row_64	176968	Cell death abnormality protein 2	null	null	5576	0.190155	-0.155864	No
row_65	175066	Cactin	null	null	5603	0.18859	-0.155023	No
row_66	180889	Cytochrome P450 daf-9	null	null	5618	0.187851	-0.153522	No
row_67	259654	CaDmium Responsive	null	null	5707	0.182184	-0.156096	No
row_68	174458	Transcription factor dpl-1	null	null	5830	0.176679	-0.160542	No
row_69	181019	Apyrase apy-1	null	null	5840	0.176076	-0.158765	No
row_70	182681	RING finger protein 121	null	null	5938	0.170875	-0.161835	No
row_71	176393	Protein lin-52	null	null	5976	0.16896	-0.1616	No
row_72	178142	Beta-1,3-galactosyltransferase bre-5	null	null	6012	0.166884	-0.161255	No
row_73	176608	MoRTal germline	null	null	6045	0.164743	-0.160745	No
row_74	174285	Putative histone deacetylase 2	null	null	6058	0.163986	-0.159133	No
row_75	179612	E3 ubiquitin-protein ligase hrd-1	null	null	6149	0.158848	-0.161818	No
row_76	178660	Heat shock protein Hsp-16.41	null	null	6168	0.157575	-0.160536	No
row_77	174726	RAs-related GTP-binding protein A	null	null	6353	0.147474	-0.168398	No
row_78	173074	Histone deacetylase	null	null	6393	0.145714	-0.168273	No
row_79	179274	Germinal Center Kinase family	null	null	6527	0.13918	-0.173326	No
row_80	172915	Derlin-1	null	null	6548	0.137967	-0.172155	No
row_81	179217	Protein mom-2	null	null	6556	0.137452	-0.170268	No
row_82	175545	Mitogen-activated protein kinase mpk-1	null	null	6586	0.135949	-0.169592	No
row_83	179878	F-box/WD repeat-containing protein sel-10	null	null	6622	0.134171	-0.169247	No
row_84	173985	Eps15 (endocytosis protein) Homologous Sequence	null	null	6631	0.133525	-0.167415	No
row_85	190668	Beta-1,4-N-acetylgalactosaminyltransferase bre-4	null	null	6654	0.13243	-0.166354	No
row_86	176018	Derlin-2	null	null	6831	0.122703	-0.173775	No
row_87	179195	SeRPin	null	null	6857	0.120967	-0.172879	No
row_88	176849	Leucine-rich repeats and immunoglobulin-like domains protein sma-10	null	null	6880	0.118937	-0.171818	No
row_89	179611	Putative syntaxin-5	null	null	6887	0.118484	-0.169876	No
row_90	174317	Segment polarity protein dishevelled homolog mig-5	null	null	6927	0.116507	-0.169752	No
row_91	176774	Cyclin-dependent-like kinase 5	null	null	6970	0.114411	-0.169792	No
row_92	179177	Ragulator complex protein LAMTOR2 homolog	null	null	7139	0.105747	-0.176773	No
row_93	3565776	Apoptosis regulator ced-9	null	null	7205	0.102151	-0.17808	No
row_94	180367	NUMb related	null	null	7208	0.102049	-0.175917	No
row_95	177942	Uncharacterized protein	null	null	7305	0.0969106	-0.178932	Yes
row_96	176758	Lissencephaly-1 homolog	null	null	7344	0.0949036	-0.178752	Yes
row_97	177345	Beclin homolog	null	null	7353	0.0941136	-0.17692	Yes
row_98	177249	Uncharacterized protein	null	null	7368	0.0933508	-0.175419	Yes
row_99	172856	Protein mom-5	null	null	7467	0.0872625	-0.178544	Yes
row_100	171883	Serine/threonine-protein kinase RIO1	null	null	7513	0.0847053	-0.178749	Yes
row_101	177692	Uncharacterized protein	null	null	7545	0.0824946	-0.178184	Yes
row_102	179720	Suppressor/Enhancer of Lin-12	null	null	7556	0.0818609	-0.176462	Yes
row_103	175802	Armadillo repeat-containing protein wrm-1	null	null	7560	0.0816551	-0.174355	Yes
row_104	176817	Mediator of RNA polymerase II transcription subunit 29	null	null	7604	0.078651	-0.17445	Yes
row_105	180133	E2F-like (mammalian transcription factor)	null	null	7606	0.0785754	-0.172233	Yes
row_106	176327	GTP-binding protein Rheb homolog 1	null	null	7610	0.0782159	-0.170125	Yes
row_107	177546	Inositol 1,4,5-trisphosphate receptor itr-1	null	null	7670	0.0747232	-0.171102	Yes
row_108	177737	SQPNFLRF-amide	null	null	7672	0.0746924	-0.168884	Yes
row_109	181495	Oxysterol Binding protein (OSBP) Related	null	null	7686	0.0738378	-0.167328	Yes
row_110	177343	Protein skinhead-1	null	null	7757	0.070117	-0.16891	Yes
row_111	173404	Activated in Blocked Unfolded protein response	null	null	7789	0.0686864	-0.168345	Yes
row_112	177416	Progestin and AdipoQ Receptor family	null	null	7802	0.0680724	-0.166733	Yes
row_113	172842	Mitogen-activated protein kinase kinase kinase mom-4	null	null	7811	0.0675892	-0.164901	Yes
row_114	266854	DiSHevelled related	null	null	7825	0.0670366	-0.163344	Yes
row_115	266845	Dauer or Aging adult Overexpression	null	null	7833	0.0666852	-0.161457	Yes
row_116	175934	hypothetical protein	null	null	7856	0.0654948	-0.160396	Yes
row_117	183715	Dopamine receptor 4	null	null	7969	0.0598686	-0.164292	Yes
row_118	175433	RAL (Ras-related GTPase) homolog	null	null	8025	0.0567455	-0.165049	Yes
row_119	179424	Serine/threonine-protein kinase akt-1	null	null	8035	0.0562733	-0.163272	Yes
row_120	171872	Dual specificity mitogen-activated protein kinase kinase mek-2	null	null	8041	0.0557001	-0.161275	Yes
row_121	176254	ATPase asna-1	null	null	8059	0.0546106	-0.159938	Yes
row_122	172847	Ectopic P Granules	null	null	8165	0.0491424	-0.163449	Yes
row_123	183963	MACOilin homolog	null	null	8173	0.048401	-0.161561	Yes
row_124	175089	hypothetical protein	null	null	8204	0.0463604	-0.160941	Yes
row_125	176506	HP1 Like (heterochromatin protein)	null	null	8216	0.0457742	-0.159274	Yes
row_126	189705	Ectopic P Granules	null	null	8224	0.0453754	-0.157387	Yes
row_127	177162	WaRThog (hedgehog-like family)	null	null	8252	0.0441954	-0.156601	Yes
row_128	175327	PDGF/VEGF growth factor related	null	null	8276	0.0427593	-0.155595	Yes
row_129	179347	DOPamine receptor	null	null	8291	0.0418043	-0.154094	Yes
row_130	178284	Synaptojanin	null	null	8327	0.0399906	-0.153749	Yes
row_131	172574	Rab3 GTPase-activating protein regulatory subunit	null	null	8347	0.0385258	-0.152523	Yes
row_132	177770	Uncharacterized protein	null	null	8416	0.0347015	-0.153995	Yes
row_133	180904	Protein-serine O-palmitoleoyltransferase porcupine	null	null	8429	0.0341804	-0.152383	Yes
row_134	179838	Caveolin-2	null	null	8505	0.0291064	-0.154242	Yes
row_135	179649	Protein kinase C	null	null	8632	0.0215094	-0.158909	Yes
row_136	172981	Forkhead box protein O	null	null	8662	0.01967	-0.158233	Yes
row_137	183000	Glutathione transferase omega-1	null	null	8677	0.0187681	-0.156732	Yes
row_138	172167	Target of rapamycin homolog	null	null	8680	0.0184263	-0.154569	Yes
row_139	180919	Peptide transporter family 1	null	null	8688	0.0180039	-0.152682	Yes
row_140	173128	Dual-Leucine zipper Kinase	null	null	8755	0.0138783	-0.154044	Yes
row_141	191014	hypothetical protein	null	null	8763	0.0135133	-0.152157	Yes
row_142	190251	Enhancer of Glp-One (glp-1)	null	null	8766	0.0134677	-0.149994	Yes
row_143	172689	SUPpressor	null	null	8787	0.0120592	-0.148823	Yes
row_144	181004	Dual specificity mitogen-activated protein kinase kinase mek-1	null	null	8814	0.0101123	-0.147983	Yes
row_145	177084	Enhancer of EfL-1 mutant phenotype	null	null	8827	0.00938141	-0.146371	Yes
row_146	176554	Ribosomal protein S6 kinase beta	null	null	8831	0.00923085	-0.144263	Yes
row_147	172591	APC Related	null	null	8854	0.00715237	-0.143202	Yes
row_148	176565	Gamma-secretase subunit pen-2	null	null	8864	0.00670642	-0.141425	Yes
row_149	180750	LONg	null	null	8889	0.00540056	-0.140474	Yes
row_150	172905	Nicastrin	null	null	8903	0.00469181	-0.138918	Yes
row_151	180894	High-energy light unresponsive protein 1	null	null	8923	0.00388581	-0.137692	Yes
row_152	175502	Sterile alpha and TIR motif-containing protein tir-1	null	null	8978	0.000382641	-0.138393	Yes
row_153	185248	Activated in Blocked Unfolded protein response	null	null	9008	-0.0015639	-0.137718	Yes
row_154	266837	hypothetical protein	null	null	9090	-0.00697564	-0.139906	Yes
row_155	179213	Suppressor/enhancer of lin-12 protein 9	null	null	9123	-0.00978732	-0.139396	Yes
row_156	181707	SUppressor of activated let-60 Ras	null	null	9127	-0.0100821	-0.137288	Yes
row_157	176390	CalNeXin	null	null	9132	-0.0105932	-0.135236	Yes
row_158	171952	Phosphatidylinositol-binding clathrin assembly protein unc-11	null	null	9235	-0.0174777	-0.138581	Yes
row_159	260016	GTPase Activating Protein family	null	null	9257	-0.0190047	-0.137465	Yes
row_160	179959	Histone deacetylase 1	null	null	9272	-0.020203	-0.135964	Yes
row_161	180014	hypothetical protein	null	null	9327	-0.0247938	-0.136665	Yes
row_162	174137	Sex-determining transformer protein 2	null	null	9360	-0.0269494	-0.136155	Yes
row_163	177373	Lin-12 And Glp-1 phenotype	null	null	9372	-0.0278329	-0.134488	Yes
row_164	175020	Protein wntless homolog	null	null	9373	-0.0279452	-0.132215	Yes
row_165	172088	Rho-associated protein kinase let-502	null	null	9442	-0.03279	-0.133688	Yes
row_166	173904	Tyrosine-protein phosphatase vhp-1	null	null	9465	-0.034296	-0.132627	Yes
row_167	174227	TryPtophan Hydroxylase	null	null	9481	-0.0354331	-0.13118	Yes
row_168	180923	Cation Diffusion Facilitator family	null	null	9529	-0.0397194	-0.131496	Yes
row_169	180982	Beta-catenin/armadillo-related protein 1	null	null	9577	-0.0432311	-0.131812	Yes
row_170	171898	hypothetical protein	null	null	9579	-0.0435961	-0.129595	Yes
row_171	175541	X-box Binding Protein homolog	null	null	9655	-0.0479551	-0.131453	Yes
row_172	178537	1-phosphatidylinositol 4,5-bisphosphate phosphodiesterase beta egl-8	null	null	9672	-0.0492959	-0.130061	Yes
row_173	176179	Kinesin heavy chain	null	null	9732	-0.0530698	-0.131038	Yes
row_174	171623	Dauer abnormal formation protein 25	null	null	9761	-0.0552784	-0.130308	Yes
row_175	180121	Serine/threonine-protein kinase dkf-2	null	null	9797	-0.0585976	-0.129963	Yes
row_176	191781	Serpentine receptor class alpha-10	null	null	9840	-0.0622215	-0.130003	Yes
row_177	172233	hypothetical protein	null	null	9851	-0.0627567	-0.128281	Yes
row_178	181505	Putative syntaxin-2	null	null	9852	-0.062874	-0.126008	Yes
row_179	172005	Innexin-16	null	null	9900	-0.0662938	-0.126324	Yes
row_180	177048	Synembryn	null	null	9907	-0.0666393	-0.124382	Yes
row_181	266648	Synaptobrevin-1	null	null	9936	-0.0686788	-0.123652	Yes
row_182	181772	hypothetical protein	null	null	9958	-0.0699767	-0.122536	Yes
row_183	176852	Defecation Suppressor of Clk-1	null	null	9995	-0.0727955	-0.122246	Yes
row_184	176257	Probable V-type proton ATPase 116 kDa subunit a	null	null	10062	-0.0768068	-0.123608	Yes
row_185	176512	Calcium-transporting ATPase	null	null	10142	-0.0816374	-0.125686	Yes
row_186	181334	Eukaryotic translation initiation factor 2-alpha kinase pek-1	null	null	10157	-0.0824558	-0.124185	Yes
row_187	171994	Abnormal cell lineage protein 44	null	null	10170	-0.0832492	-0.122573	Yes
row_188	175322	SERotonin/octopamine receptor family	null	null	10176	-0.0836396	-0.120576	Yes
row_189	176866	GLH-binding kinase 1	null	null	10179	-0.0839972	-0.118413	Yes
row_190	181580	EGR (Early Growth factor Response factor) Homolog	null	null	10222	-0.0870331	-0.118454	Yes
row_191	171591	Peptide P4	null	null	10231	-0.0875221	-0.116622	Yes
row_192	175524	Casein kinase I isoform alpha	null	null	10279	-0.0913237	-0.116938	Yes
row_193	175606	Putative neurobeachin homolog	null	null	10297	-0.0927085	-0.115601	Yes
row_194	178294	Prion-like-(Q/N-rich)-domain-bearing protein	null	null	10333	-0.0953627	-0.115256	Yes
row_195	173794	Ephrin receptor 1	null	null	10382	-0.0992092	-0.115627	Yes
row_196	177111	Ras-related protein ced-10	null	null	10541	-0.110597	-0.122057	Yes
row_197	178104	Ras protein let-60	null	null	10559	-0.111544	-0.12072	Yes
row_198	180746	DNaJ domain (prokaryotic heat shock protein)	null	null	10561	-0.111688	-0.118503	Yes
row_199	191599	AcetylCholine Receptor	null	null	10631	-0.116239	-0.12003	Yes
row_200	185460	Helix Loop Helix	null	null	10665	-0.118768	-0.119575	Yes
row_201	3565419	CLeaR	null	null	10739	-0.123048	-0.121323	Yes
row_202	173287	Axin-like protein pry-1	null	null	10776	-0.125606	-0.121033	Yes
row_203	174121	Egg-laying defective protein 27	null	null	10781	-0.125841	-0.118981	Yes
row_204	179349	hypothetical protein	null	null	10798	-0.126983	-0.117589	Yes
row_205	176349	JNK-interacting protein	null	null	10802	-0.127373	-0.115482	Yes
row_206	174067	Autophagic-related protein 16.2	null	null	10861	-0.131278	-0.116404	Yes
row_207	175410	Insulin-like receptor subunit beta	null	null	10862	-0.131363	-0.114131	Yes
row_208	180871	Probable type I inositol 1,4,5-trisphosphate 5-phosphatase	null	null	10870	-0.131932	-0.112244	Yes
row_209	175942	Calcitonin receptor-like protein 1	null	null	10876	-0.132503	-0.110247	Yes
row_210	180731	Protein lunapark-1	null	null	10892	-0.133453	-0.1088	Yes
row_211	177141	Osmotic avoidance abnormal protein 3	null	null	10946	-0.1388	-0.109446	Yes
row_212	177610	Mitogen-activated protein kinase pmk-3	null	null	10958	-0.139774	-0.10778	Yes
row_213	182944	FMRF-Like Peptide	null	null	11001	-0.142916	-0.10782	Yes
row_214	191743	Mitogen-activated protein kinase pmk-1	null	null	11068	-0.147349	-0.109183	Yes
row_215	181082	Kinase suppressor of Ras A	null	null	11086	-0.148437	-0.107846	Yes
row_216	172597	Protein lin-10	null	null	11099	-0.148912	-0.106234	Yes
row_217	178218	Ack-related non-receptor tyrosine kinase	null	null	11139	-0.151563	-0.10611	Yes
row_218	175788	Calcipressin-like protein	null	null	11203	-0.156481	-0.107307	Yes
row_219	181263	Nuclear hormone receptor family member daf-12	null	null	11218	-0.157567	-0.105805	Yes
row_220	181344	hypothetical protein	null	null	11241	-0.159057	-0.104744	Yes
row_221	176743	Syntaxin-1A homolog	null	null	11298	-0.162883	-0.105556	Yes
row_222	176808	Serine/threonine kinase NLK	null	null	11313	-0.163899	-0.104054	Yes
row_223	259744	SERotonin/octopamine receptor family	null	null	11315	-0.164004	-0.101837	Yes
row_224	172678	CoLlagen with Endostatin domain	null	null	11341	-0.165494	-0.100941	Yes
row_225	259698	Putative syntaxin 6	null	null	11343	-0.165592	-0.0987232	Yes
row_226	184064	Abnormal cell migration protein 21	null	null	11387	-0.168848	-0.0988188	Yes
row_227	177286	Leucine-rich repeat protein soc-2	null	null	11467	-0.173825	-0.100897	Yes
row_228	177370	K+/Cl-Cotransporter	null	null	11496	-0.176055	-0.100167	Yes
row_229	180959	Serpentine receptor class r-10	null	null	11503	-0.176584	-0.0982245	Yes
row_230	175072	Neuronal acetylcholine receptor subunit eat-2	null	null	11594	-0.18394	-0.100909	Yes
row_231	181556	TGF-beta-activated kinase 1 and MAP3K7-binding protein 1	null	null	11626	-0.185812	-0.100343	Yes
row_232	246019	PLeXin	null	null	11634	-0.186298	-0.0984563	Yes
row_233	181055	Sex muscle abnormal protein 5	null	null	11687	-0.190197	-0.0990476	Yes
row_234	172483	Guanine nucleotide-binding protein subunit beta-2	null	null	11700	-0.191594	-0.0974359	Yes
row_235	3565871	Putative syntaxin-3	null	null	11726	-0.193072	-0.0965401	Yes
row_236	259839	Myosin-4	null	null	11742	-0.193938	-0.0950935	Yes
row_237	180359	HIF (Hypoxia Inducible Factor) homologa	null	null	11748	-0.194293	-0.0930962	Yes
row_238	178458	Ras-like GTP-binding protein rhoA	null	null	11760	-0.195109	-0.0914293	Yes
row_239	179046	LIPase Like	null	null	11787	-0.197401	-0.0905886	Yes
row_240	180974	Probable protein disulfide-isomerase A6	null	null	11836	-0.200859	-0.0909597	Yes
row_241	178997	Calreticulin	null	null	11913	-0.205481	-0.0928729	Yes
row_242	178949	Adenylyl CYclase	null	null	11951	-0.207623	-0.092638	Yes
row_243	177611	Mitogen-activated protein kinase	null	null	11963	-0.208312	-0.0909712	Yes
row_244	191699	potassium channel, KvQLT family	null	null	12051	-0.213501	-0.0934903	Yes
row_245	184469	OCTopamine Receptor (GPCR)	null	null	12075	-0.215538	-0.0924843	Yes
row_246	171687	G protein, Subunit Alpha	null	null	12100	-0.217207	-0.0915335	Yes
row_247	178942	Kinesin light chain	null	null	12141	-0.219587	-0.0914639	Yes
row_248	180645	Regulator of G protein Signaling	null	null	12155	-0.220584	-0.0899072	Yes
row_249	179244	GRounDhog (hedgehog-like family)	null	null	12164	-0.221399	-0.0880751	Yes
row_250	180983	DNaJ domain (prokaryotic heat shock protein)	null	null	12175	-0.222027	-0.0863531	Yes
row_251	181007	UDP-Glucose Glycoprotein glucosylTransferase	null	null	12182	-0.222589	-0.0844109	Yes
row_252	176597	CREB Homolog	null	null	12189	-0.223001	-0.0824686	Yes
row_253	175955	Dwarfin sma-3	null	null	12276	-0.229024	-0.0849326	Yes
row_254	190602	RGM domain family member drag-1	null	null	12278	-0.229294	-0.082715	Yes
row_255	176201	GTPase-activating protein pac-1	null	null	12295	-0.230732	-0.0813235	Yes
row_256	191602	AcetylCholine Receptor	null	null	12317	-0.231851	-0.0802074	Yes
row_257	181382	Protein cab-1	null	null	12329	-0.232447	-0.0785405	Yes
row_258	191757	Resistance to inhibitors of cholinesterase protein 19	null	null	12333	-0.232795	-0.076433	Yes
row_259	179770	NIDogen (basement membrane protein)	null	null	12347	-0.233502	-0.0748763	Yes
row_260	177821	Uncharacterized protein	null	null	12348	-0.23358	-0.0726036	Yes
row_261	180574	Serine/threonine-protein kinase kin-29	null	null	12350	-0.233653	-0.070386	Yes
row_262	177633	Uncharacterized protein	null	null	12375	-0.235448	-0.0694351	Yes
row_263	174462	Receptor protein-tyrosine kinase	null	null	12392	-0.236785	-0.0680436	Yes
row_264	172505	Guanine nucleotide-binding protein G(o) subunit alpha	null	null	12431	-0.239086	-0.0678639	Yes
row_265	173398	NMUR (NeuroMedin U Receptor) homolog	null	null	12435	-0.239342	-0.0657564	Yes
row_266	176147	Probable protein disulfide-isomerase A4	null	null	12473	-0.243143	-0.0655215	Yes
row_267	181595	Rab3 GTPase-activating protein catalytic subunit	null	null	12485	-0.243995	-0.0638547	Yes
row_268	175890	High mobility group protein 1.2	null	null	12537	-0.246683	-0.0643909	Yes
row_269	180843	Surfeit locus protein 4 homolog	null	null	12560	-0.248002	-0.0633299	Yes
row_270	172703	Acetylcholine receptor subunit beta-type unc-29	null	null	12567	-0.248493	-0.0613877	Yes
row_271	186869	Axin-like protein 1	null	null	12597	-0.25107	-0.0607122	Yes
row_272	171805	Innexin-19	null	null	12637	-0.254467	-0.0605875	Yes
row_273	180801	Activator of G protein Signalling	null	null	12667	-0.256488	-0.0599121	Yes
row_274	180752	NeuroPeptide Receptor family	null	null	12687	-0.257886	-0.0586858	Yes
row_275	180100	Serine/threonine-protein phosphatase 2A regulatory subunit pptr-1	null	null	12693	-0.258224	-0.0566885	Yes
row_276	181043	Dual specificity mitogen-activated protein kinase kinase sek-1	null	null	12712	-0.259361	-0.0554072	Yes
row_277	180203	Calcium-activated potassium channel slo-1	null	null	12739	-0.260906	-0.0545665	Yes
row_278	185682	MAP kinase kinase mkk-4	null	null	12751	-0.261661	-0.0528996	Yes
row_279	181723	Histone deacetylase 4	null	null	12759	-0.262119	-0.0510124	Yes
row_280	177936	INSulin related	null	null	12805	-0.265657	-0.0512182	Yes
row_281	3564873	STarGazin (mammalian calcium channel) homolog	null	null	12866	-0.270126	-0.0522502	Yes
row_282	172613	Anion exchange protein	null	null	12887	-0.271126	-0.051079	Yes
row_283	174967	GQTFVRF-amide	null	null	12900	-0.271991	-0.0494672	Yes
row_284	179068	DPP/BMP-Like	null	null	12924	-0.273071	-0.0484613	Yes
row_285	177547	SPSAVPLIRF-amide	null	null	12939	-0.273514	-0.0469597	Yes
row_286	174144	Kinesin-like protein unc-104	null	null	12949	-0.273956	-0.0451827	Yes
row_287	173149	Glycogen synthase kinase-3	null	null	13035	-0.279362	-0.0475916	Yes
row_288	176691	Gamma-aminobutyric acid receptor subunit beta	null	null	13040	-0.279617	-0.0455392	Yes
row_289	180880	Heat Shock Protein	null	null	13088	-0.282969	-0.0458551	Yes
row_290	181450	HP1 Like (heterochromatin protein)	null	null	13098	-0.283397	-0.0440781	Yes
row_291	175781	Cell surface receptor daf-4	null	null	13145	-0.285418	-0.044339	Yes
row_292	180611	Ral GDS-Like	null	null	13152	-0.285878	-0.0423967	Yes
row_293	181584	hypothetical protein	null	null	13201	-0.289444	-0.0427677	Yes
row_294	176472	hypothetical protein	null	null	13260	-0.293945	-0.0436895	Yes
row_295	177940	Carboxypeptidase E	null	null	13358	-0.300629	-0.0467594	Yes
row_296	183687	hypothetical protein	null	null	13362	-0.300975	-0.0446519	Yes
row_297	175807	related to Islet cell Diabetes Autoantigen	null	null	13379	-0.30197	-0.0432604	Yes
row_298	177717	GDP-mannose 4,6 dehydratase 1	null	null	13399	-0.302958	-0.0420342	Yes
row_299	180864	cAMP-dependent protein kinase regulatory subunit	null	null	13434	-0.305634	-0.0416341	Yes
row_300	172593	Cytoplasmic dynein 2 heavy chain 1	null	null	13452	-0.307293	-0.0402977	Yes
row_301	188491	G-protein coupled receptor aex-2	null	null	13458	-0.307777	-0.0383004	Yes
row_302	177820	Delta(6)-fatty-acid desaturase fat-3	null	null	13495	-0.309702	-0.0380105	Yes
row_303	171832	hypothetical protein	null	null	13518	-0.311173	-0.0369495	Yes
row_304	185980	Helix-loop-helix protein 13	null	null	13523	-0.31147	-0.0348971	Yes
row_305	172889	Aryl hydrocarbon receptor nuclear translocator homolog	null	null	13544	-0.313196	-0.0337259	Yes
row_306	175175	Integrin-linked protein kinase homolog pat-4	null	null	13559	-0.314437	-0.0322243	Yes
row_307	180810	Dual specificity mitogen-activated protein kinase kinase jkk-1	null	null	13560	-0.314478	-0.0299515	Yes
row_308	172209	TOMosyn synaptic protein	null	null	13567	-0.314695	-0.0280093	Yes
row_309	181153	Protein vav-1	null	null	13571	-0.315003	-0.0259018	Yes
row_310	172995	Leucine-rich repeat serine/threonine-protein kinase 1	null	null	13613	-0.316539	-0.0258873	Yes
row_311	173894	DiSHevelled related	null	null	13652	-0.319096	-0.0257075	Yes
row_312	177078	L1 CAM ADhesion molecule homolog	null	null	13663	-0.319737	-0.0239856	Yes
row_313	175489	Adenylyl CYclase	null	null	13672	-0.320219	-0.0221535	Yes
row_314	171635	TOLl (Drosophila) family	null	null	13692	-0.321701	-0.0209272	Yes
row_315	177379	Uncharacterized protein	null	null	13696	-0.321786	-0.0188197	Yes
row_316	175126	Basement membrane proteoglycan	null	null	13732	-0.324292	-0.0184747	Yes
row_317	172394	Transcription factor unc-37	null	null	13746	-0.325309	-0.016918	Yes
row_318	181221	TPLGTMRF-amide	null	null	13818	-0.331198	-0.0185559	Yes
row_319	180441	Presenilin sel-12	null	null	13849	-0.333265	-0.0179355	Yes
row_320	177109	GRounDhog (hedgehog-like family)	null	null	13885	-0.336103	-0.0175905	Yes
row_321	174235	Phosphodiesterase	null	null	13930	-0.338777	-0.0177412	Yes
row_322	180944	Inward rectifier potassium channel irk-1	null	null	13982	-0.343098	-0.0182775	Yes
row_323	179259	E3 ubiquitin-protein ligase rpm-1	null	null	13985	-0.343364	-0.0161149	Yes
row_324	179707	Regulator of G-protein signaling egl-10	null	null	13992	-0.343903	-0.0141726	Yes
row_325	181524	Serine/threonine-protein kinase akt-2	null	null	13998	-0.344382	-0.0121753	Yes
row_326	181706	Acetylcholinesterase 1	null	null	14006	-0.345334	-0.0102881	Yes
row_327	181261	Tyrosine-protein kinase abl-1	null	null	14069	-0.349191	-0.0114302	Yes
row_328	180420	MAP kinase-activating death domain protein	null	null	14113	-0.352501	-0.0115259	Yes
row_329	181172	Ras GTPase-activating protein gap-2	null	null	14137	-0.353455	-0.0105199	Yes
row_330	185977	Coexpressed With Polycystins	null	null	14153	-0.354371	-0.00907339	Yes
row_331	181030	Putative acetylcholine regulator unc-18	null	null	14174	-0.355629	-0.00790223	Yes
row_332	186801	Gamma-aminobutyric acid receptor exp-1	null	null	14175	-0.355826	-0.0056295	Yes
row_333	176988	COLlagen	null	null	14263	-0.362401	-0.00814858	Yes
row_334	172823	hypothetical protein	null	null	14279	-0.363564	-0.00670202	Yes
row_335	180717	Autophagic-related protein 16.1	null	null	14298	-0.364778	-0.0054207	Yes
row_336	180854	FMRF-Like Peptide	null	null	14302	-0.365247	-0.00331321	Yes
row_337	181271	SMAll	null	null	14307	-0.366085	-0.0012608	Yes
row_338	180713	AP-2 complex subunit mu	null	null	14319	-0.366785	0.000406071	Yes
row_339	173748	RHo Guanine nucleotide exchange Factor	null	null	14322	-0.366985	0.00256864	Yes
row_340	173200	Phosphodiesterase	null	null	14335	-0.367995	0.00418043	Yes
row_341	171751	hypothetical protein	null	null	14377	-0.370815	0.00419495	Yes
row_342	179427	Synaptosomal-associated protein	null	null	14390	-0.372152	0.00580674	Yes
row_343	181405	ATF (cAMP-dependent transcription factor) family	null	null	14399	-0.372932	0.00763884	Yes
row_344	173038	DYStrophin related	null	null	14416	-0.374484	0.00903032	Yes
row_345	172732	related to vertebrate MEF2 transcription factor	null	null	14423	-0.374622	0.0109726	Yes
row_346	182110	SERotonin/octopamine receptor family	null	null	14440	-0.375772	0.0123641	Yes
row_347	174693	Adapter protein unc-53	null	null	14442	-0.37581	0.0145817	Yes
row_348	181357	LIM/homeobox protein ttx-3	null	null	14466	-0.377784	0.0155876	Yes
row_349	174120	SyNapTotagmin	null	null	14508	-0.380498	0.0156021	Yes
row_350	191740	Major sperm protein	null	null	14538	-0.382422	0.0162776	Yes
row_351	173399	Protein Wnt-1	null	null	14561	-0.384257	0.0173386	Yes
row_352	172789	Putative iroquois-class homeodomain protein irx-1	null	null	14581	-0.385889	0.0185649	Yes
row_353	181481	BMP Receptor Associated protein family	null	null	14651	-0.390361	0.0170372	Yes
row_354	171715	DYstroBrevin homolog	null	null	14664	-0.391178	0.018649	Yes
row_355	176987	SyNapsiN	null	null	14666	-0.391231	0.0208666	Yes
row_356	172788	Aryl hydrocarbon receptor protein 1	null	null	14743	-0.396556	0.0189534	Yes
row_357	175622	Adenylyl CYclase	null	null	14747	-0.396627	0.0210609	Yes
row_358	180402	hypothetical protein	null	null	14774	-0.39841	0.0219016	Yes
row_359	181539	Suppressor/Enhancer of Lin-12	null	null	14793	-0.399624	0.0231829	Yes
row_360	184695	Activated in Blocked Unfolded protein response	null	null	14795	-0.399645	0.0254006	Yes
row_361	182278	Calcium/calmodulin-dependent protein kinase kinase	null	null	14806	-0.400373	0.0271225	Yes
row_362	176155	Voltage-dependent calcium channel unc-36	null	null	14833	-0.402128	0.0279632	Yes
row_363	172105	Acetylcholine receptor subunit alpha-type unc-38	null	null	14861	-0.403831	0.0287488	Yes
row_364	180995	Synaptogyrin homolog 1	null	null	14882	-0.405367	0.02992	Yes
row_365	191652	Receptor-type guanylate cyclase gcy-23	null	null	14890	-0.406032	0.0318072	Yes
row_366	189055	Intraflagellar transport associated protein 2	null	null	14903	-0.406967	0.033419	Yes
row_367	184883	Intraflagellar transport protein 122 homolog	null	null	14918	-0.40804	0.0349206	Yes
row_368	177570	Resistance to inhibitors of cholinesterase protein 3	null	null	14941	-0.409792	0.0359816	Yes
row_369	173971	RAB family	null	null	14947	-0.410257	0.0379789	Yes
row_370	177140	Uncharacterized protein	null	null	15013	-0.414503	0.0366716	Yes
row_371	178269	Acetylcholine receptor subunit beta-type lev-1	null	null	15038	-0.415867	0.0376224	Yes
row_372	191607	Adenylyl CYclase	null	null	15064	-0.417455	0.0385182	Yes
row_373	180936	Acetylcholine receptor subunit beta-type acr-2	null	null	15125	-0.421221	0.0374862	Yes
row_374	175195	GEX Interacting protein	null	null	15158	-0.423343	0.0379965	Yes
row_375	181255	Liprin-alpha	null	null	15162	-0.423489	0.0401039	Yes
row_376	187442	Serine/threonine-protein kinase dyf-5	null	null	15168	-0.423891	0.0421013	Yes
row_377	176415	Regulator of G protein Signaling	null	null	15195	-0.426616	0.042942	Yes
row_378	171849	Protein pop-1	null	null	15209	-0.427948	0.0444987	Yes
row_379	188499	Dopamine receptor 3	null	null	15276	-0.433175	0.0431362	Yes
row_380	172757	Heat Shock Protein	null	null	15316	-0.437884	0.0432609	Yes
row_381	180714	DOPamine receptor	null	null	15351	-0.440334	0.043661	Yes
row_382	178237	Receptor-type guanylate cyclase gcy-18	null	null	15409	-0.444524	0.0427943	Yes
row_383	180357	Defective pharyngeal development protein 4	null	null	15423	-0.445779	0.044351	Yes
row_384	180530	Ras GTPase-activating protein gap-1	null	null	15427	-0.446324	0.0464585	Yes
row_385	181557	hypothetical protein	null	null	15465	-0.449848	0.0466933	Yes
row_386	172150	Acetylcholine receptor subunit alpha-type unc-63	null	null	15485	-0.451046	0.0479195	Yes
row_387	181424	Guanine nucleotide-binding protein subunit gamma	null	null	15498	-0.452153	0.0495313	Yes
row_388	179269	hypothetical protein	null	null	15524	-0.454392	0.0504271	Yes
row_389	180570	hypothetical protein	null	null	15529	-0.454765	0.0524795	Yes
row_390	177460	Stress-activated protein kinase jnk-1	null	null	15604	-0.461695	0.0506765	Yes
row_391	180933	potassium channel, KvQLT family	null	null	15608	-0.462275	0.0527839	Yes
row_392	171905	Carboxylic ester hydrolase	null	null	15701	-0.470957	0.0499895	Yes
row_393	188812	Cyclin-dependent kinase 5 activator 1	null	null	15748	-0.475492	0.0497286	Yes
row_394	181662	Protein lin-15B	null	null	15757	-0.476044	0.0515607	Yes
row_395	177334	Netrin receptor unc-5	null	null	15767	-0.477522	0.0533377	Yes
row_396	180990	Rab-3-interacting molecule unc-10	null	null	15871	-0.488262	0.0499374	Yes
row_397	180937	Acetylcholine receptor subunit beta-type acr-3	null	null	15895	-0.490684	0.0509433	Yes
row_398	175893	G-protein-linked Acetylcholine Receptor	null	null	15903	-0.491554	0.0528305	Yes
row_399	181291	Myoblast growth factor receptor egl-15	null	null	15911	-0.492405	0.0547177	Yes
row_400	179962	Muscarinic acetylcholine receptor gar-3	null	null	15934	-0.494715	0.0557787	Yes
row_401	174044	Serine/threonine-protein kinase sma-6	null	null	15941	-0.495152	0.057721	Yes
row_402	186262	Probable diacylglycerol kinase 3	null	null	15946	-0.495984	0.0597734	Yes
row_403	181421	Chromodomain-helicase-DNA-binding protein 3 homolog	null	null	15973	-0.499751	0.0606141	Yes
row_404	189814	NA	null	null	15982	-0.500531	0.0624462	Yes
row_405	176204	Glutamate receptor 1	null	null	15995	-0.502108	0.064058	Yes
row_406	181414	Regulator of G protein Signaling	null	null	16091	-0.511255	0.0610982	Yes
row_407	180922	Probable muscarinic acetylcholine receptor gar-1	null	null	16127	-0.516331	0.0614432	Yes
row_408	180555	Synaptogenesis protein syg-1	null	null	16130	-0.516781	0.0636058	Yes
row_409	180401	hypothetical protein	null	null	16139	-0.517517	0.0654379	Yes
row_410	175909	Protein let-756	null	null	16142	-0.517665	0.0676005	Yes
row_411	172600	INSulin related	null	null	16159	-0.519726	0.068992	Yes
row_412	172493	Suppressor of lurcher protein 1	null	null	16162	-0.520177	0.0711545	Yes
row_413	180724	Protein Disulfide Isomerase	null	null	16206	-0.524986	0.0710589	Yes
row_414	176304	Sodium-dependent dopamine transporter	null	null	16222	-0.527563	0.0725054	Yes
row_415	181195	GTPase-activating protein rrc-1	null	null	16247	-0.529772	0.0734563	Yes
row_416	179344	Rap Guanine nucleotide Exchange Factor homolog	null	null	16272	-0.533105	0.0744072	Yes
row_417	180452	Diacylglycerol kinase	null	null	16401	-0.549159	0.0696299	Yes
row_418	176282	Protein lin-12	null	null	16448	-0.556587	0.069369	Yes
row_419	177117	Uncharacterized protein	null	null	16458	-0.558648	0.071146	Yes
row_420	180706	DOPamine receptor	null	null	16459	-0.558684	0.0734187	Yes
row_421	181716	SERotonin/octopamine receptor family	null	null	16526	-0.567285	0.0720563	Yes
row_422	181588	hypothetical protein	null	null	16534	-0.568256	0.0739435	Yes
row_423	177584	Receptor-type guanylate cyclase gcy-8	null	null	16537	-0.568447	0.0761061	Yes
row_424	180579	Vang-like protein	null	null	16546	-0.568997	0.0779382	Yes
row_425	177815	Caveolin	null	null	16575	-0.572896	0.0786687	Yes
row_426	179605	Receptor-type guanylate cyclase daf-11	null	null	16582	-0.573832	0.080611	Yes
row_427	181561	Synaptogenesis protein syg-2	null	null	16608	-0.578091	0.0815067	Yes
row_428	182722	hypothetical protein	null	null	16642	-0.582019	0.0819619	Yes
row_429	175674	Novel Channel type/putative Nematode CAlcium channel	null	null	16667	-0.586329	0.0829127	Yes
row_430	181471	Serine/threonine kinase SAD-1	null	null	16719	-0.592347	0.0823765	Yes
row_431	191782	Serpentine receptor class alpha-11	null	null	16783	-0.605649	0.0811793	Yes
row_432	177019	Neuronal SYmmetry	null	null	16875	-0.626275	0.0784399	Yes
row_433	173759	Guanine nucleotide-binding protein alpha-11 subunit	null	null	17172	-0.70426	0.0644094	Yes
row_434	180587	SVPGVLRF-amide 3	null	null	17183	-0.707018	0.0661314	Yes
row_435	184378	STarGazin (mammalian calcium channel) homolog	null	null	17256	-0.734827	0.0644385	Yes
row_436	176713	hypothetical protein	null	null	17398	-0.779123	0.0589452	Yes
row_437	353458	Activated in Blocked Unfolded protein response	null	null	17536	-0.837247	0.0536722	Yes
row_438	260292	Serpentine Receptor, class BC (class B-like)	null	null	17616	-0.871585	0.0515938	Yes
row_439	181403	Nuclear hormone receptor family member odr-7	null	null	17959	-1.07966	0.0350297	Yes
NAME	CELL_CYCLE(4)	NA	GENE SYMBOL	GENE_TITLE	RANK IN GENE LIST	RANK METRIC SCORE	RUNNING ES	CORE ENRICHMENT
row_0	175753	LONg	null	null	299	1.40767	-0.0145131	Yes
row_1	259316	hypothetical protein	null	null	411	1.25619	-0.0186384	Yes
row_2	175067	hypothetical protein	null	null	501	1.18665	-0.021548	Yes
row_3	171960	Serine/threonine-protein phosphatase PP1-delta	null	null	788	1.03118	-0.0353428	Yes
row_4	172082	Serine/threonine-protein phosphatase PP1-gamma	null	null	928	0.963011	-0.0410152	Yes
row_5	183952	hypothetical protein	null	null	1041	0.908168	-0.0451957	Yes
row_6	177655	MEiotic SPindle	null	null	1154	0.857166	-0.0493762	Yes
row_7	176310	Cytoplasmic polyadenylation element-binding protein 1	null	null	1185	0.845465	-0.0490258	Yes
row_8	172090	Kinesin Cargo Adaptor	null	null	1249	0.819954	-0.0504988	Yes
row_9	176061	ATP-dependent RNA helicase cgh-1	null	null	1258	0.816529	-0.0489328	Yes
row_10	3565532	hypothetical protein	null	null	1306	0.796733	-0.0495218	Yes
row_11	180304	Serine/threonine-protein kinase chk-2	null	null	1346	0.784121	-0.0496687	Yes
row_12	171745	Cyclin-dependent kinases regulatory subunit	null	null	1374	0.773477	-0.0491525	Yes
row_13	13191136	hypothetical protein	null	null	1401	0.764442	-0.0485811	Yes
row_14	172213	Kinesin-like protein	null	null	1402	0.764295	-0.0465731	Yes
row_15	174016	Fem-3 mRNA-binding factor 1	null	null	1419	0.756888	-0.0454491	Yes
row_16	172666	MoRTal germline	null	null	1531	0.715028	-0.0495744	Yes
row_17	172515	Piwi-like protein	null	null	1537	0.712901	-0.0478426	Yes
row_18	172532	Female germline-specific tumor suppressor gld-1	null	null	1538	0.712847	-0.0458346	Yes
row_19	178065	CYtochrome P450 family	null	null	1551	0.709696	-0.0444896	Yes
row_20	172374	Meiotic spindle formation protein 2	null	null	1600	0.696098	-0.0451338	Yes
row_21	179586	Deubiquitylating with USP/UBP and OTU domains	null	null	1612	0.692629	-0.0437336	Yes
row_22	174157	MutS protein homolog him-14	null	null	1654	0.682692	-0.043991	Yes
row_23	177461	P granule abnormality protein 1	null	null	1693	0.668705	-0.0440826	Yes
row_24	177241	Homolog Of ELAC2 (cancer susceptibility locus)	null	null	1696	0.66815	-0.0421851	Yes
row_25	172786	hypothetical protein	null	null	1831	0.630181	-0.0475812	Yes
row_26	171838	Serine/threonine-protein kinase plk-2	null	null	1860	0.620194	-0.0471203	Yes
row_27	173158	Cytokinesis, Apoptosis, RNA-associated	null	null	1864	0.619669	-0.045278	Yes
row_28	177462	High Incidence of Males (increased X chromosome loss)	null	null	1886	0.613376	-0.0444304	Yes
row_29	175776	X chromosome NonDisjunction factor	null	null	1887	0.613239	-0.0424223	Yes
row_30	175388	CrossOver Site Associated	null	null	1891	0.612943	-0.04058	Yes
row_31	175991	Chondroitin proteoglycan-2	null	null	1895	0.611113	-0.0387378	Yes
row_32	177995	Uncharacterized protein	null	null	1956	0.596014	-0.040045	Yes
row_33	259571	Him-Three Paralog	null	null	1966	0.591486	-0.0385343	Yes
row_34	174196	hypothetical protein	null	null	1975	0.587055	-0.0369683	Yes
row_35	183192	hypothetical protein	null	null	1992	0.583754	-0.0358443	Yes
row_36	178210	Protein let-99	null	null	2032	0.577752	-0.0359912	Yes
row_37	180102	hypothetical protein	null	null	2056	0.574177	-0.0352541	Yes
row_38	172524	Enhancer of Glp-One (glp-1)	null	null	2062	0.571699	-0.0335223	Yes
row_39	186223	Histone H3-like centromeric protein cpar-1	null	null	2082	0.566737	-0.0325641	Yes
row_40	176230	5'-AMP-activated protein kinase catalytic subunit alpha-1	null	null	2103	0.563608	-0.0316612	Yes
row_41	172784	Kinesin-like protein	null	null	2105	0.563447	-0.0297084	Yes
row_42	190809	High Incidence of Males (increased X chromosome loss)	null	null	2109	0.562705	-0.0278661	Yes
row_43	175586	Chondroitin proteoglycan 1	null	null	2132	0.556955	-0.0270737	Yes
row_44	174081	Probable Werner syndrome ATP-dependent helicase homolog 1	null	null	2145	0.554499	-0.0257287	Yes
row_45	174197	PUF (Pumilio/FBF) domain-containing	null	null	2177	0.548309	-0.0254336	Yes
row_46	178295	Meiotic recombination protein rec-8	null	null	2179	0.547926	-0.0234808	Yes
row_47	172099	Him-Three Paralog	null	null	2255	0.529446	-0.0256169	Yes
row_48	172399	G1/S-specific cyclin-E	null	null	2273	0.526389	-0.0245482	Yes
row_49	171912	Separin homolog sep-1	null	null	2287	0.524619	-0.0232585	Yes
row_50	174566	Oocyte and Germ-line Related	null	null	2300	0.522934	-0.0219135	Yes
row_51	182160	Long Arms of the Bivalent protein	null	null	2329	0.519081	-0.0214526	Yes
row_52	175841	CDK5RAP1-like protein	null	null	2406	0.508428	-0.0236439	Yes
row_53	173635	Beta-1,3-galactosyltransferase sqv-2	null	null	2409	0.50795	-0.0217464	Yes
row_54	172667	hypothetical protein	null	null	2412	0.507573	-0.0198489	Yes
row_55	172533	Glucosamine phosphate N-Acetyl transferase	null	null	2415	0.507279	-0.0179514	Yes
row_56	259363	hypothetical protein	null	null	2469	0.498466	-0.0188718	Yes
row_57	172660	CalPoNin	null	null	2483	0.496079	-0.0175821	Yes
row_58	176092	Cytokinesis defective protein 7	null	null	2532	0.486852	-0.0182263	Yes
row_59	171895	Feminization Of Germline	null	null	2539	0.485211	-0.0165498	Yes
row_60	177474	Kinesin-like protein	null	null	2554	0.482882	-0.0153153	Yes
row_61	191771	Meiotic recombination protein spo-11	null	null	2569	0.480284	-0.0140809	Yes
row_62	179488	Double-strand break repair protein mre-11	null	null	2585	0.477117	-0.0129017	Yes
row_63	176511	Kinesin-like protein	null	null	2589	0.47639	-0.0110594	Yes
row_64	179949	COHesin family	null	null	2606	0.472624	-0.00993543	Yes
row_65	176067	LIGase	null	null	2611	0.472027	-0.00814841	Yes
row_66	174799	hypothetical protein	null	null	2615	0.471527	-0.00630614	Yes
row_67	171786	TPX2 (Targeting Protein for Xenopus Klp2)-Like	null	null	2646	0.466626	-0.00595576	Yes
row_68	178201	Bloom syndrome protein homolog	null	null	2685	0.459463	-0.0060474	Yes
row_69	172830	Ribonuclease 3	null	null	2730	0.451226	-0.00647058	Yes
row_70	179802	Sun domain-containing protein 1	null	null	2781	0.444031	-0.00722528	Yes
row_71	172329	Importin subunit alpha-2	null	null	2793	0.442328	-0.00582505	Yes
row_72	176750	Kinesin-like protein	null	null	2794	0.441672	-0.00381702	Yes
row_73	174174	Defective in germ line development protein 3	null	null	2818	0.437264	-0.00307985	Yes
row_74	175443	Nuclear Pore complex Protein	null	null	2841	0.434472	-0.00228742	Yes
row_75	176631	DNA topoisomerase 3	null	null	2888	0.426069	-0.0028211	Yes
row_76	173869	Leucine-Rich Repeat protein	null	null	2900	0.423447	-0.00142087	Yes
row_77	187005	MUTator	null	null	2919	0.419843	-0.000407427	Yes
row_78	172353	M-phase inducer phosphatase cdc-25.1	null	null	2955	0.415785	-0.00033331	Yes
row_79	172712	Spindle-defective protein 2	null	null	2959	0.415381	0.00150896	Yes
row_80	178268	MSH (MutS Homolog) family	null	null	3003	0.409148	0.00114104	Yes
row_81	176065	Telomere length regulation protein clk-2	null	null	3011	0.408612	0.00276229	Yes
row_82	177647	Putative syntaxin-4	null	null	3077	0.399078	0.00117876	Yes
row_83	173161	Profilin-1	null	null	3087	0.398269	0.0026895	Yes
row_84	171939	human HUS1 related	null	null	3091	0.39781	0.00453177	Yes
row_85	191632	ADP-ribosylation factor-like protein 2	null	null	3096	0.397485	0.00631878	Yes
row_86	173947	hypothetical protein	null	null	3123	0.393164	0.00689019	Yes
row_87	171784	Cyclin-dependent kinase 7	null	null	3137	0.391058	0.00817991	Yes
row_88	175962	BRCa homolog (tumor suppressor gene Brca1)	null	null	3165	0.386904	0.00869606	Yes
row_89	178007	Kinesin Light Chain	null	null	3176	0.385404	0.0101516	Yes
row_90	175499	BRCa homolog (tumor suppressor gene Brca1)	null	null	3181	0.38491	0.0119386	Yes
row_91	171798	Protein zwilch homolog	null	null	3207	0.38093	0.0125652	Yes
row_92	173872	Securin-like protein	null	null	3238	0.376895	0.0129156	Yes
row_93	174624	Transitional endoplasmic reticulum ATPase homolog 1	null	null	3258	0.375169	0.0138738	Yes
row_94	178938	hypothetical protein	null	null	3308	0.368567	0.0131744	Yes
row_95	174017	Fem-3 mRNA-binding factor 2	null	null	3313	0.368173	0.0149614	Yes
row_96	183189	ShuGOshin (yeast chromosome segregation protein) homolog	null	null	3315	0.367905	0.0169142	Yes
row_97	174658	ECT2 (mammalian Rho GEF) homolog	null	null	3316	0.367811	0.0189222	Yes
row_98	173808	Sister chromatid cohesion protein 1	null	null	3325	0.367	0.0204882	Yes
row_99	183841	URI (Unconventional prefoldin RPB5 Interactor) homolog	null	null	3335	0.365528	0.0219989	Yes
row_100	174332	Regulator of chromosome condensation	null	null	3353	0.363408	0.0230676	Yes
row_101	177520	Kinetochore-associated protein rod-1	null	null	3361	0.362619	0.0246889	Yes
row_102	172773	SKp1 Related (ubiquitin ligase complex component)	null	null	3399	0.359156	0.0246525	Yes
row_103	178507	Heat shock 70 kDa protein A	null	null	3400	0.358785	0.0266605	Yes
row_104	190099	SQuashed Vulva	null	null	3427	0.355979	0.0272319	Yes
row_105	172155	Spindle-defective protein 5	null	null	3436	0.35512	0.0287979	Yes
row_106	171656	hypothetical protein	null	null	3439	0.354855	0.0306954	Yes
row_107	174288	Actin-like protein C08B11.6	null	null	3441	0.354677	0.0326482	Yes
row_108	183250	yeast PRP (splicing factor) related	null	null	3464	0.351493	0.0334406	Yes
row_109	173085	Kinase suppressor of Ras B	null	null	3484	0.349702	0.0343988	Yes
row_110	172644	Zip (yeast meiotic zipper) Homologous Protein	null	null	3550	0.343286	0.0328153	Yes
row_111	176064	Protein CLASP-1	null	null	3574	0.34084	0.0335525	Yes
row_112	179678	DNA repair protein rad-50	null	null	3631	0.335449	0.0324662	Yes
row_113	174386	PhosphatidylInositol-Glycan biosynthesis class A protein	null	null	3677	0.330733	0.0319878	Yes
row_114	171675	G Protein, Alpha subunit	null	null	3735	0.324868	0.0308463	Yes
row_115	172242	Histone H1.5	null	null	3737	0.324728	0.0327991	Yes
row_116	178759	Anterior Pharynx in eXcess	null	null	3741	0.324395	0.0346414	Yes
row_117	176361	Tubulin gamma chain	null	null	3776	0.320576	0.0347707	Yes
row_118	179352	ATM (ataxia telangectasia mutated)-Like	null	null	3781	0.320406	0.0365578	Yes
row_119	172562	Non-muscle MYosin	null	null	3787	0.319906	0.0382895	Yes
row_120	172342	hypothetical protein	null	null	3795	0.319348	0.0399108	Yes
row_121	179237	hypothetical protein	null	null	3798	0.319311	0.0418083	Yes
row_122	179353	HoloCentric chromosome binding Protein	null	null	3812	0.318165	0.043098	Yes
row_123	176652	Protein timeless homolog	null	null	3846	0.314643	0.0432826	Yes
row_124	179202	Aurora/Ipl1 Related kinase	null	null	3892	0.310809	0.0428042	Yes
row_125	179117	hypothetical protein	null	null	3897	0.310501	0.0445912	Yes
row_126	178345	Spindle assembly abnormal protein 6	null	null	3927	0.307007	0.0449969	Yes
row_127	176286	Protein glp-1	null	null	3966	0.304158	0.0449052	Yes
row_128	171964	HoloCentric chromosome binding Protein	null	null	3983	0.302359	0.0460292	Yes
row_129	172612	Meiotic spindle formation protein mei-1	null	null	4030	0.298024	0.0454955	Yes
row_130	171950	PaTched Related family	null	null	4031	0.29802	0.0475035	Yes
row_131	172586	Cell Division Cycle related	null	null	4083	0.294169	0.0466936	Yes
row_132	180185	Serine/threonine-protein kinase par-4	null	null	4107	0.292193	0.0474307	Yes
row_133	172473	hypothetical protein	null	null	4136	0.289138	0.0478916	Yes
row_134	171683	hypothetical protein	null	null	4145	0.288164	0.0494576	Yes
row_135	183932	High Incidence of Males (increased X chromosome loss)	null	null	4157	0.28626	0.0508579	Yes
row_136	266650	NEDD8-activating enzyme E1 regulatory subunit	null	null	4163	0.286095	0.0525896	Yes
row_137	175885	GEN1 Holliday junction resolvase homolog	null	null	4172	0.285407	0.0541556	Yes
row_138	174309	Transitional endoplasmic reticulum ATPase homolog 2	null	null	4174	0.285331	0.0561084	Yes
row_139	177914	Uncharacterized protein	null	null	4243	0.281661	0.0543591	Yes
row_140	172682	Germline survival defective-1	null	null	4263	0.279905	0.0553173	Yes
row_141	179227	DNaJ domain (prokaryotic heat shock protein)	null	null	4322	0.276198	0.0541205	Yes
row_142	171657	hypothetical protein	null	null	4330	0.275414	0.0557418	Yes
row_143	175818	DEAD boX helicase homolog	null	null	4336	0.274782	0.0574736	Yes
row_144	176639	Serine/threonine-protein kinase zyg-8	null	null	4358	0.273219	0.0583212	Yes
row_145	172783	SMN (human Survival Motor Neuron gene) homolog	null	null	4379	0.272088	0.0592242	Yes
row_146	179443	Pre-mRNA-splicing factor SLU7	null	null	4447	0.267268	0.0575301	Yes
row_147	186560	F-box A protein	null	null	4496	0.263124	0.0568859	Yes
row_148	183199	Putative serine/threonine-protein phosphatase pph-6	null	null	4497	0.263062	0.058894	Yes
row_149	172616	Transcription factor cep-1	null	null	4503	0.262729	0.0606257	Yes
row_150	173874	Structural maintenance of chromosomes protein 5	null	null	4514	0.26178	0.0620812	Yes
row_151	188142	Paired Zinc Finger protein	null	null	4535	0.260769	0.0629842	Yes
row_152	172886	Serine/threonine-protein phosphatase 2A regulatory subunit rsa-1	null	null	4564	0.257666	0.0634451	Yes
row_153	176816	E3 ubiquitin-protein ligase parkin	null	null	4621	0.253709	0.0623588	Yes
row_154	176392	ADP-ribosylation factor-like protein 5	null	null	4630	0.252834	0.0639248	Yes
row_155	179010	Receptor Mediated Endocytosis	null	null	4638	0.252322	0.0655461	Yes
row_156	173369	hypothetical protein	null	null	4643	0.252004	0.0673331	Yes
row_157	173370	Deletions Of G-rich DNA	null	null	4665	0.250037	0.0681808	Yes
row_158	176359	Histone H3-like centromeric protein hcp-3	null	null	4672	0.249534	0.0698573	Yes
row_159	176266	BUD13 homolog	null	null	4686	0.248188	0.071147	Yes
row_160	3565921	Serine/threonine-protein kinase chk-1	null	null	4719	0.245404	0.0713869	Yes
row_161	179592	Spindle assembly abnormal protein 5	null	null	4729	0.244329	0.0728976	Yes
row_162	172662	hypothetical protein	null	null	4734	0.244141	0.0746846	Yes
row_163	173124	HMG	null	null	4756	0.242546	0.0755323	Yes
row_164	176503	GTP-binding nuclear protein ran-1	null	null	4812	0.238403	0.0745013	Yes
row_165	172782	Ubiquitin carboxyl-terminal hydrolase	null	null	4839	0.237063	0.0750727	Yes
row_166	176798	TAF (TBP-associated transcription factor) family	null	null	4851	0.236339	0.076473	Yes
row_167	174759	hypothetical protein	null	null	4854	0.236209	0.0783705	Yes
row_168	174261	CKI family (Cyclin-dependent Kinase Inhibitor)	null	null	4873	0.234627	0.0793839	Yes
row_169	176138	Endoribonuclease dcr-1	null	null	4903	0.232247	0.0797896	Yes
row_170	177873	Kinetochore protein ndc-80	null	null	4904	0.232223	0.0817976	Yes
row_171	172598	Maternal uncoordinated protein 2	null	null	4956	0.228821	0.0809877	Yes
row_172	173956	Probable serine/threonine-protein kinase zyg-1	null	null	5014	0.224379	0.0798462	Yes
row_173	174350	Zygote defective protein 9	null	null	5062	0.221774	0.0792572	Yes
row_174	176115	Ran GTPase-activating protein 2	null	null	5108	0.218637	0.0787788	Yes
row_175	172041	Dynein Heavy Chain	null	null	5109	0.218588	0.0807868	Yes
row_176	175604	Anaphase-promoting complex subunit 11	null	null	5152	0.216156	0.0804742	Yes
row_177	176868	3'-5' exonuclease eri-1	null	null	5183	0.213932	0.0808246	Yes
row_178	175275	hypothetical protein	null	null	5217	0.211649	0.0810092	Yes
row_179	183040	hypothetical protein	null	null	5241	0.210269	0.0817464	Yes
row_180	176507	RING finger protein 113 homolog	null	null	5253	0.209016	0.0831466	Yes
row_181	179800	High Incidence of Males (increased X chromosome loss)	null	null	5277	0.207825	0.0838838	Yes
row_182	186851	hypothetical protein	null	null	5355	0.202596	0.0816372	Yes
row_183	174698	Anaphase-promoting complex subunit 1	null	null	5374	0.201507	0.0826506	Yes
row_184	176855	FiLamiN (actin binding protein) homolog	null	null	5396	0.200344	0.0834983	Yes
row_185	176143	Serine/threonine-protein kinase plk-1	null	null	5413	0.199141	0.0846223	Yes
row_186	190203	hypothetical protein	null	null	5431	0.197983	0.085691	Yes
row_187	173329	Nuclear Pore complex Protein	null	null	5444	0.19675	0.0870359	Yes
row_188	173072	NEDD8-conjugating enzyme ubc-12	null	null	5464	0.195638	0.0879941	Yes
row_189	172146	yeast PRP (splicing factor) related	null	null	5476	0.194943	0.0893944	Yes
row_190	191704	Lateral-signal-Induced Phosphatase	null	null	5504	0.193453	0.0899105	Yes
row_191	177683	Poly Adp-Ribose (ADP-ribose) Glycohydrolase	null	null	5521	0.192943	0.0910345	Yes
row_192	175813	Kinetochore protein Nuf2 homolog	null	null	5530	0.192325	0.0926005	Yes
row_193	174674	Peptidyl-prolyl cis-trans isomerase 4	null	null	5540	0.191881	0.0941112	Yes
row_194	171752	Emerin homolog 1	null	null	5555	0.191143	0.0953457	Yes
row_195	174551	hypothetical protein	null	null	5572	0.190374	0.0964696	Yes
row_196	175066	Cactin	null	null	5603	0.18859	0.09682	Yes
row_197	175850	Germ Cell Nuclear Antigen	null	null	5642	0.186169	0.0967284	Yes
row_198	176010	hypothetical protein	null	null	5704	0.182363	0.0953659	Yes
row_199	176661	proteasome Regulatory Particle, ATPase-like	null	null	5725	0.181516	0.0962688	Yes
row_200	176927	COP9 signalosome complex subunit 4	null	null	5726	0.18147	0.0982768	Yes
row_201	179338	MAD (yeast Mitosis arrest DeFicient) related	null	null	5740	0.180958	0.0995666	Yes
row_202	179440	Actin-related protein 2	null	null	5748	0.180584	0.101188	Yes
row_203	174535	NanOS related	null	null	5782	0.179204	0.101372	Yes
row_204	173373	hypothetical protein	null	null	5801	0.177831	0.102386	Yes
row_205	176200	ES2 similar protein 2	null	null	5814	0.177105	0.103731	Yes
row_206	178146	Tat-binding homolog 7	null	null	5829	0.176699	0.104965	Yes
row_207	171954	Nuclear Pore complex Protein	null	null	5888	0.173011	0.103769	Yes
row_208	174313	Putative pachytene checkpoint protein 2	null	null	5907	0.172063	0.104782	Yes
row_209	175603	Structural maintenance of chromosomes protein 4	null	null	5940	0.170859	0.105022	Yes
row_210	174430	Suppressor of ZYg-1	null	null	5983	0.168556	0.104709	Yes
row_211	4363023	Splicing factor 3B subunit 4	null	null	6002	0.167439	0.105723	Yes
row_212	173233	hypothetical protein	null	null	6016	0.166177	0.107012	Yes
row_213	172338	Poly(A) RNA polymerase gld-2	null	null	6017	0.166158	0.10902	Yes
row_214	171888	Vasa-and Belle-like Helicase	null	null	6032	0.165436	0.110255	Yes
row_215	176608	MoRTal germline	null	null	6045	0.164743	0.1116	Yes
row_216	174600	STIP (Septin and Tuftelin Interacting Protein) homolog	null	null	6077	0.163269	0.111895	Yes
row_217	174158	NanOS related	null	null	6084	0.162668	0.113572	Yes
row_218	177895	Guanine nucleotide-binding protein subunit beta-2-like 1	null	null	6124	0.160202	0.113425	Yes
row_219	175117	Masculinisation Of Germline	null	null	6201	0.155637	0.111233	Yes
row_220	174823	Nuclear Pore complex Protein	null	null	6213	0.154835	0.112634	Yes
row_221	175133	Transforming acid coiled-coil-containing protein 1	null	null	6226	0.153906	0.113978	Yes
row_222	173410	Nipped-B-like protein pqn-85	null	null	6320	0.149377	0.110848	Yes
row_223	172330	Heterogeneous nuclear RibonucleoProtein (HnRNP) K homolog	null	null	6327	0.148975	0.112524	Yes
row_224	174267	Spindle apparatus protein lin-5	null	null	6336	0.148391	0.11409	Yes
row_225	176183	Histone-lysine N-methyltransferase met-2	null	null	6344	0.147905	0.115712	Yes
row_226	176748	Nucleoporin SEH1	null	null	6352	0.147542	0.117333	Yes
row_227	176615	MIF (Macrophage migration Inhibitory Factor) related	null	null	6364	0.146946	0.118733	Yes
row_228	173920	Probable pre-mRNA-splicing factor ATP-dependent RNA helicase mog-5	null	null	6396	0.145649	0.119028	Yes
row_229	185482	Mps One Binder (Mats/MOB1) homolog	null	null	6478	0.141467	0.116561	Yes
row_230	172999	yeast PRP (splicing factor) related	null	null	6493	0.140678	0.117795	Yes
row_231	175837	Probable dynactin subunit 2	null	null	6515	0.139877	0.118643	Yes
row_232	172268	Aurora/IPL1-related protein kinase 2	null	null	6518	0.13975	0.12054	Yes
row_233	179274	Germinal Center Kinase family	null	null	6527	0.13918	0.122106	Yes
row_234	180168	COP9 signalosome complex subunit 1	null	null	6542	0.138371	0.123341	Yes
row_235	179049	HoloCentric chromosome binding Protein	null	null	6549	0.137957	0.125017	Yes
row_236	179749	Cohesin subunit scc-3	null	null	6552	0.137835	0.126915	Yes
row_237	189237	DAF-16/FOXO Controlled, germline Tumor affecting	null	null	6553	0.13777	0.128923	Yes
row_238	179217	Protein mom-2	null	null	6556	0.137452	0.13082	Yes
row_239	176280	CLASP family of microtubule-binding proteins	null	null	6574	0.136348	0.131889	Yes
row_240	175545	Mitogen-activated protein kinase mpk-1	null	null	6586	0.135949	0.133289	Yes
row_241	175210	HELicase Q homolog	null	null	6596	0.135414	0.1348	Yes
row_242	176834	COP9 signalosome complex subunit 3	null	null	6612	0.134603	0.135979	Yes
row_243	179413	Cullin-5	null	null	6618	0.134378	0.137711	Yes
row_244	178289	COP-9 SigNalosome subunit	null	null	6626	0.133898	0.139332	Yes
row_245	179358	RING-box protein 1	null	null	6638	0.133262	0.140732	Yes
row_246	176815	CYtoKinesis defect	null	null	6641	0.13312	0.14263	Yes
row_247	174433	Torsin-like protein	null	null	6648	0.132852	0.144306	Yes
row_248	179534	Actin-2	null	null	6655	0.132427	0.145983	Yes
row_249	176374	Cyclin-dependent kinase 1	null	null	6671	0.13154	0.147162	Yes
row_250	174579	hypothetical protein	null	null	6693	0.130355	0.14801	Yes
row_251	176172	Spindle assembly abnormal protein 4	null	null	6702	0.130051	0.149576	Yes
row_252	177840	Uncharacterized protein	null	null	6726	0.128618	0.150313	Yes
row_253	177988	LSM Sm-like protein	null	null	6740	0.128067	0.151603	Yes
row_254	173167	Tubulin alpha-2 chain	null	null	6742	0.127961	0.153556	Yes
row_255	177987	DyNactin Complex component	null	null	6854	0.121025	0.14943	Yes
row_256	174314	Cell division cycle protein 16 homolog	null	null	6870	0.119638	0.15061	Yes
row_257	191526	Methyltransferase-like protein 16 homolog	null	null	6906	0.117461	0.150684	Yes
row_258	175900	THO Complex (transcription factor/nuclear export) subunit	null	null	6908	0.117432	0.152636	Yes
row_259	179027	Gastrulation defective protein 1	null	null	6917	0.116795	0.154202	Yes
row_260	174317	Segment polarity protein dishevelled homolog mig-5	null	null	6927	0.116507	0.155713	Yes
row_261	179709	AcTiniN	null	null	6982	0.11407	0.154737	Yes
row_262	173767	Probable U2 small nuclear ribonucleoprotein A'	null	null	6984	0.113803	0.15669	Yes
row_263	171774	Nuclear pore protein	null	null	7003	0.112452	0.157704	Yes
row_264	172826	Serine/threonine-protein phosphatase 2A regulatory subunit sur-6	null	null	7015	0.111844	0.159104	Yes
row_265	176409	Probable pre-mRNA-splicing factor ATP-dependent RNA helicase mog-1	null	null	7023	0.111555	0.160725	Yes
row_266	176536	Regulator of spindle assembly protein 2	null	null	7025	0.111536	0.162678	Yes
row_267	177824	mRNA transport homolog 4	null	null	7072	0.109085	0.162144	Yes
row_268	171911	Cyclin-Dependent Kinase family	null	null	7091	0.108212	0.163158	Yes
row_269	266859	WD repeat-containing protein fzy-1	null	null	7153	0.104943	0.161795	Yes
row_270	177342	COP9 signalosome complex subunit 5	null	null	7159	0.104613	0.163527	Yes
row_271	3565011	KELch-repeat containing protein	null	null	7171	0.104258	0.164927	Yes
row_272	174150	TransCription Elongation Regulator homolog	null	null	7195	0.102584	0.165664	Yes
row_273	172761	Protein Phosphatase Four Regulatory subunit	null	null	7262	0.0991755	0.164026	Yes
row_274	177181	RNP (RRM RNA binding domain) containing	null	null	7268	0.0988782	0.165757	Yes
row_275	172145	Cell division cycle protein 27 homolog	null	null	7285	0.0977598	0.166881	Yes
row_276	175783	Partitioning defective protein 3	null	null	7331	0.0954433	0.166403	Yes
row_277	176758	Lissencephaly-1 homolog	null	null	7344	0.0949036	0.167748	Yes
row_278	177456	Dolichyl-diphosphooligosaccharide--protein glycosyltransferase subunit 1	null	null	7371	0.0932223	0.168319	Yes
row_279	173225	CYclophyliN	null	null	7381	0.0925121	0.16983	Yes
row_280	171630	TAF (TBP-associated transcription factor) family	null	null	7391	0.0916905	0.171341	Yes
row_281	178113	14-3-3-like protein 1	null	null	7434	0.0888396	0.171028	Yes
row_282	172856	Protein mom-5	null	null	7467	0.0872625	0.171268	Yes
row_283	178829	FIdGetin-Like (mammalian developmental AAA ATPase) related	null	null	7469	0.0870514	0.173221	Yes
row_284	174725	SAPS (phosphatase associated) domain protein	null	null	7487	0.085843	0.174289	Yes
row_285	175802	Armadillo repeat-containing protein wrm-1	null	null	7560	0.0816551	0.172319	Yes
row_286	175006	Chromosome segregation and cytokinesis defective protein 1	null	null	7598	0.0792838	0.172283	Yes
row_287	174233	Cell division control protein 42 homolog	null	null	7600	0.0789491	0.174235	Yes
row_288	175018	Mitotic checkpoint protein bub-3	null	null	7608	0.0783075	0.175857	Yes
row_289	176697	Probable actin-related protein 2/3 complex subunit 3	null	null	7620	0.0774159	0.177257	Yes
row_290	173341	DNaJ domain (prokaryotic heat shock protein)	null	null	7661	0.0753062	0.177055	Yes
row_291	172092	Replication Protein A homolog	null	null	7674	0.0746136	0.1784	Yes
row_292	172406	Tumorous Enhancer of Glp-1(gf)	null	null	7690	0.0736172	0.179579	Yes
row_293	176702	human MRG (Mortality factor-Related Gene) related	null	null	7692	0.0732238	0.181532	Yes
row_294	172116	Structural maintenance of chromosomes protein 1	null	null	7701	0.0727308	0.183098	Yes
row_295	3564983	Transcription initiation factor TFIID subunit 10	null	null	7745	0.0705555	0.18273	Yes
row_296	177658	Cyclin-dependent kinases regulatory subunit	null	null	7788	0.0688049	0.182417	Yes
row_297	182257	Thioredoxin domain-containing protein 9	null	null	7792	0.0685639	0.184259	Yes
row_298	179853	LiPIN (mammalian lipodystrophy associated) homolog	null	null	7801	0.0681039	0.185825	Yes
row_299	178006	Ubiquitin-conjugating enzyme E2 2	null	null	7804	0.067955	0.187723	Yes
row_300	171788	InCenP homolog	null	null	7813	0.0675581	0.189289	Yes
row_301	266854	DiSHevelled related	null	null	7825	0.0670366	0.190689	Yes
row_302	266845	Dauer or Aging adult Overexpression	null	null	7833	0.0666852	0.19231	Yes
row_303	173137	Partitioning defective protein 6	null	null	7908	0.0631243	0.19023	Yes
row_304	176501	Tubulin beta chain	null	null	7945	0.061295	0.190248	Yes
row_305	175555	hypothetical protein	null	null	7995	0.0583449	0.189549	Yes
row_306	175959	BRCA1-associated RING domain protein 1	null	null	8023	0.0568378	0.190065	Yes
row_307	176806	Cullin-2	null	null	8026	0.0567376	0.191963	Yes
row_308	172249	Retinoblastoma-like protein homolog lin-35	null	null	8084	0.0533594	0.190821	Yes
row_309	176009	Ectopic P granules protein 4	null	null	8085	0.053224	0.192829	Yes
row_310	171922	RNP (RRM RNA binding domain) containing	null	null	8220	0.0456133	0.187433	Yes
row_311	176672	Anillin-like protein 1	null	null	8238	0.0447692	0.188502	Yes
row_312	177046	MAD (yeast Mitosis arrest DeFicient) related	null	null	8240	0.0447133	0.190455	Yes
row_313	176318	G-protein regulator 2	null	null	8279	0.0425621	0.190363	Yes
row_314	172521	Condensin complex subunit capg-1	null	null	8321	0.0402945	0.190106	Yes
row_315	174901	Putative U5 small nuclear ribonucleoprotein 200 kDa helicase	null	null	8352	0.0382083	0.190456	Yes
row_316	177533	Importin subunit alpha-3	null	null	8368	0.0373015	0.191635	Yes
row_317	172278	COP9 signalosome complex subunit 2	null	null	8377	0.0368639	0.193201	Yes
row_318	173440	yeast PRP (splicing factor) related	null	null	8417	0.0345575	0.193054	Yes
row_319	176158	Mps One Binder (Mats/MOB1) homolog	null	null	8426	0.0343366	0.19462	Yes
row_320	180904	Protein-serine O-palmitoleoyltransferase porcupine	null	null	8429	0.0341804	0.196518	Yes
row_321	177979	RNA Binding Motif protein homolog	null	null	8575	0.025345	0.190514	Yes
row_322	266885	KNL (kinetochore null) Binding Protein	null	null	8576	0.0251584	0.192522	Yes
row_323	177836	Nuclear Pore complex Protein	null	null	8631	0.0215449	0.191546	Yes
row_324	174364	hypothetical protein	null	null	8656	0.0203271	0.192228	Yes
row_325	172981	Forkhead box protein O	null	null	8662	0.01967	0.19396	Yes
row_326	176328	SR Protein Kinase	null	null	8681	0.0184091	0.194973	Yes
row_327	175549	Splicing Factor ThreeB (3b) Subunit homolog	null	null	8693	0.0178004	0.196373	Yes
row_328	172110	IMportin Beta family	null	null	8699	0.0173683	0.198105	Yes
row_329	179597	BIR (baculovirus inhibitory repeat) family	null	null	8774	0.0127088	0.196024	Yes
row_330	184953	Nuclear cap-binding protein subunit 2	null	null	8777	0.012617	0.197922	Yes
row_331	175519	Tubulin beta-2 chain	null	null	8791	0.0116868	0.199212	Yes
row_332	178563	LIPase Like	null	null	8793	0.0115604	0.201164	Yes
row_333	181004	Dual specificity mitogen-activated protein kinase kinase mek-1	null	null	8814	0.0101123	0.202067	Yes
row_334	179684	CAP-G condensin subunit	null	null	8829	0.00928153	0.203302	Yes
row_335	176464	hypothetical protein	null	null	8838	0.00880476	0.204868	Yes
row_336	172591	APC Related	null	null	8854	0.00715237	0.206047	Yes
row_337	171927	human/fission yeast MIS (MInichromosome Stability) homolog	null	null	8876	0.00593578	0.206895	Yes
row_338	172746	hypothetical protein	null	null	8933	0.0032998	0.205809	Yes
row_339	175971	hypothetical protein	null	null	8950	0.00216894	0.206932	Yes
row_340	179833	hypothetical protein	null	null	8960	0.00147469	0.208443	Yes
row_341	175281	SMN (Survival of Motor Neuron protein) Related	null	null	8965	0.00103689	0.21023	Yes
row_342	172677	Cyclin-dependent kinase 8	null	null	8968	0.000868747	0.212128	Yes
row_343	176446	Annexin	null	null	8975	0.000497221	0.213804	Yes
row_344	172089	VILliN related	null	null	9000	-0.0010278	0.214486	Yes
row_345	3565610	NA	null	null	9002	-0.00121954	0.216439	Yes
row_346	178057	Kinesin-Like Protein	null	null	9012	-0.00205927	0.21795	Yes
row_347	176116	Condensin-2 complex subunit kle-2	null	null	9016	-0.00231108	0.219792	Yes
row_348	180047	LSM Sm-like protein	null	null	9024	-0.00316223	0.221413	Yes
row_349	179243	SMEK (Dictyostelium Suppressor of MEK null) homolog	null	null	9030	-0.00340181	0.223145	Yes
row_350	176796	Myosin-2 essential light chain	null	null	9064	-0.00526015	0.22333	Yes
row_351	176003	Pre-mRNA-splicing factor syf-2	null	null	9114	-0.00925479	0.22263	Yes
row_352	175983	CYtoKinesis defect	null	null	9121	-0.00971799	0.224307	Yes
row_353	178196	Condensin complex subunit dpy-26	null	null	9199	-0.0148525	0.22206	Yes
row_354	179948	Kinesin-like protein	null	null	9200	-0.0148736	0.224068	Yes
row_355	176548	Sex-determining transformer protein 1	null	null	9213	-0.0157812	0.225413	Yes
row_356	176509	Condensin complex subunit 1	null	null	9229	-0.0169044	0.226592	Yes
row_357	177710	Cleavage Factor IM (CFIm) homolog	null	null	9236	-0.0175074	0.228269	Yes
row_358	179486	Serine/threonine-protein phosphatase PP1-alpha	null	null	9259	-0.0191831	0.229061	Yes
row_359	178079	Slit-Robo GAP homolog	null	null	9273	-0.0203528	0.230351	Yes
row_360	175244	RNP (RRM RNA binding domain) containing	null	null	9274	-0.0205262	0.232359	Yes
row_361	176164	Kinetochore null protein 1	null	null	9296	-0.0223176	0.233207	Yes
row_362	176466	Cullin-1	null	null	9359	-0.0267467	0.231789	Yes
row_363	175020	Protein wntless homolog	null	null	9373	-0.0279452	0.233079	Yes
row_364	172687	Lamin-1	null	null	9401	-0.0301247	0.233595	Yes
row_365	178117	Serine/threonine-protein phosphatase 2A catalytic subunit	null	null	9405	-0.0302805	0.235437	Yes
row_366	177325	SWI/SNF nucleosome remodeling complex component	null	null	9418	-0.0312448	0.236782	Yes
row_367	171601	Ras-related protein rab-11.1	null	null	9452	-0.0334202	0.236967	Yes
row_368	177190	DNA-directed RNA polymerase II subunit RPB1	null	null	9464	-0.0342897	0.238367	Yes
row_369	176260	M-phase inducer phosphatase cdc-25.3	null	null	9519	-0.0387989	0.237391	Yes
row_370	176625	CCR4-NOT transcription complex subunit 7	null	null	9525	-0.0394368	0.239123	Yes
row_371	175750	Probable serine/threonine-protein phosphatase PP2A regulatory subunit	null	null	9531	-0.0398471	0.240855	Yes
row_372	174284	Early embryogenesis protein zyg-11	null	null	9532	-0.0399756	0.242863	Yes
row_373	175440	Myosin regulatory light chain	null	null	9581	-0.0437412	0.242218	Yes
row_374	176465	Ataxin-2 homolog	null	null	9592	-0.0447082	0.243674	Yes
row_375	178537	1-phosphatidylinositol 4,5-bisphosphate phosphodiesterase beta egl-8	null	null	9672	-0.0492959	0.241317	Yes
row_376	177602	Sensory AXon guidance	null	null	9678	-0.0496185	0.243049	Yes
row_377	176210	G-protein regulator 1	null	null	9700	-0.0511198	0.243896	Yes
row_378	3564807	Serine/threonine-protein phosphatase PP1-beta	null	null	9702	-0.0511819	0.245849	Yes
row_379	176657	Serine/threonine-protein phosphatase 4 catalytic subunit 1	null	null	9727	-0.0527943	0.246531	Yes
row_380	176179	Kinesin heavy chain	null	null	9732	-0.0530698	0.248318	Yes
row_381	174673	F-actin-capping protein subunit beta	null	null	9759	-0.0552395	0.248889	Yes
row_382	177374	Kinesin-like protein	null	null	9780	-0.0569951	0.249792	Yes
row_383	172755	RAB family	null	null	9817	-0.0607623	0.249811	Yes
row_384	179524	ISY splicing factor homolog	null	null	9879	-0.0647499	0.248449	Yes
row_385	177048	Synembryn	null	null	9907	-0.0666393	0.248965	Yes
row_386	184980	hypothetical protein	null	null	9911	-0.0668923	0.250807	Yes
row_387	175270	Splicing factor U2AF 65 kDa subunit	null	null	10006	-0.0734396	0.247621	Yes
row_388	176706	Disintegrin and metalloproteinase domain-containing protein unc-71	null	null	10109	-0.0797215	0.243993	Yes
row_389	175556	Defective in cullin neddylation protein 1	null	null	10175	-0.0835791	0.24241	Yes
row_390	176866	GLH-binding kinase 1	null	null	10179	-0.0839972	0.244252	Yes
row_391	175058	LEM protein 2	null	null	10190	-0.0851557	0.245708	Yes
row_392	173073	Protein mago nashi homolog	null	null	10219	-0.0869065	0.246168	Yes
row_393	173294	Patterned Expression Site	null	null	10253	-0.088975	0.246353	Yes
row_394	175464	Protein lag-3	null	null	10256	-0.089426	0.248251	Yes
row_395	175524	Casein kinase I isoform alpha	null	null	10279	-0.0913237	0.249043	Yes
row_396	178486	Splicing FActor	null	null	10300	-0.0928812	0.249946	Yes
row_397	190485	hypothetical protein	null	null	10349	-0.096545	0.249302	Yes
row_398	174516	FiZzy Related family	null	null	10351	-0.0967458	0.251255	Yes
row_399	175272	Ras-related protein Rab-18	null	null	10357	-0.0970594	0.252986	Yes
row_400	174659	Histone RNA hairpin-binding protein	null	null	10363	-0.0974474	0.254718	Yes
row_401	174669	Mitotic chromosome and X-chromosome-associated protein mix-1	null	null	10368	-0.0976396	0.256505	Yes
row_402	175662	Histone-lysine N-methyltransferase set-2	null	null	10384	-0.0993372	0.257684	Yes
row_403	172208	Dolichyl-diphosphooligosaccharide--protein glycosyltransferase subunit 2	null	null	10432	-0.103378	0.257095	No
row_404	180040	G2/mitotic-specific cyclin-B3	null	null	10504	-0.108175	0.25518	No
row_405	174256	Spindly-like protein spdl-1	null	null	10524	-0.10938	0.256138	No
row_406	185424	hypothetical protein	null	null	10671	-0.119145	0.250079	No
row_407	266847	DNA topoisomerase 1	null	null	10757	-0.12474	0.247391	No
row_408	178250	Dual specificity tyrosine-phosphorylation-regulated kinase mbk-2	null	null	10758	-0.124784	0.249399	No
row_409	173287	Axin-like protein pry-1	null	null	10776	-0.125606	0.250467	No
row_410	172831	Tubulin alpha chain	null	null	10778	-0.125665	0.25242	No
row_411	173945	Cell Division Cycle related	null	null	10782	-0.125893	0.254262	No
row_412	172127	Paralysed Arrest at Two-fold	null	null	10825	-0.129117	0.25395	No
row_413	190775	ELongin C	null	null	10851	-0.130637	0.254576	No
row_414	175922	Dynein light chain 1, cytoplasmic	null	null	10931	-0.137356	0.252219	No
row_415	179533	NA	null	null	10967	-0.140353	0.252293	No
row_416	173915	Probable splicing factor, arginine/serine-rich 4	null	null	10975	-0.140518	0.253915	No
row_417	171782	ABC Transporter family	null	null	11007	-0.143253	0.25421	No
row_418	266830	HoloCentric chromosome binding Protein	null	null	11074	-0.147772	0.252571	No
row_419	180468	Sorting NeXin	null	null	11154	-0.152658	0.250214	No
row_420	186719	NeuroPeptide Receptor family	null	null	11310	-0.163791	0.243658	No
row_421	176808	Serine/threonine kinase NLK	null	null	11313	-0.163899	0.245555	No
row_422	259744	SERotonin/octopamine receptor family	null	null	11315	-0.164004	0.247508	No
row_423	177212	Histone H2A.V	null	null	11399	-0.169354	0.24493	No
row_424	172646	Transient receptor potential channel	null	null	11499	-0.176327	0.241468	No
row_425	177597	Protein sidekick homolog	null	null	11630	-0.186111	0.236292	No
row_426	178458	Ras-like GTP-binding protein rhoA	null	null	11760	-0.195109	0.231173	No
row_427	171722	Tyrosine protein-kinase src-1	null	null	11911	-0.205289	0.224892	No
row_428	173007	Cadherin-related hmr-1	null	null	11934	-0.206508	0.225685	No
row_429	180598	Exocyst complex component 1	null	null	11976	-0.209002	0.225427	No
row_430	185264	C-type LECtin	null	null	12043	-0.212688	0.223789	No
row_431	178942	Kinesin light chain	null	null	12141	-0.219587	0.220437	No
row_432	188438	Uncharacterized protein	null	null	12149	-0.220341	0.222058	No
row_433	173319	Tropomyosin isoforms a/b/d/f	null	null	12289	-0.23027	0.216386	No
row_434	178614	CalMoDulin	null	null	12328	-0.232437	0.216294	No
row_435	180603	SPeCtrin	null	null	12361	-0.234572	0.216534	No
row_436	177921	Calcium/calmodulin-dependent protein kinase type II	null	null	12388	-0.236445	0.217106	No
row_437	172505	Guanine nucleotide-binding protein G(o) subunit alpha	null	null	12431	-0.239086	0.216793	No
row_438	180667	hypothetical protein	null	null	12512	-0.245401	0.214381	No
row_439	175890	High mobility group protein 1.2	null	null	12537	-0.246683	0.215062	No
row_440	181316	Intermediate filament protein ifa-1	null	null	12551	-0.247482	0.216352	No
row_441	180393	Eukaryotic translation initiation factor 4E-2	null	null	12604	-0.251998	0.215487	No
row_442	177537	C.Elegans Chromodomain protein	null	null	12707	-0.258991	0.211859	No
row_443	191697	Kinesin-like protein klp-3	null	null	12716	-0.259956	0.213425	No
row_444	171988	hypothetical protein	null	null	12814	-0.266288	0.210073	No
row_445	181362	Protein mes-1	null	null	12863	-0.270097	0.209429	No
row_446	179068	DPP/BMP-Like	null	null	12924	-0.273071	0.208122	No
row_447	174260	Cyclin-dependent kinase inhibitor 1	null	null	12996	-0.276915	0.206207	No
row_448	173149	Glycogen synthase kinase-3	null	null	13035	-0.279362	0.206115	No
row_449	172298	Peptide transporter 3	null	null	13084	-0.282762	0.205471	No
row_450	181577	EPsiN (endocytic protein) homolog	null	null	13162	-0.286714	0.203224	No
row_451	178791	hypothetical protein	null	null	13174	-0.287409	0.204625	No
row_452	180767	Actin-4	null	null	13255	-0.293698	0.202212	No
row_453	181727	5'-AMP-activated protein kinase catalytic subunit alpha-2	null	null	13263	-0.29419	0.203834	No
row_454	180435	hypothetical protein	null	null	13273	-0.294701	0.205344	No
row_455	180455	STAUfen (dsRNA binding protein) homolog	null	null	13312	-0.297743	0.205253	No
row_456	174803	G Protein, Beta subunit	null	null	13388	-0.30217	0.203117	No
row_457	192062	Tetraspanin	null	null	13513	-0.310947	0.198273	No
row_458	3565725	Delta-like protein	null	null	13606	-0.316303	0.195198	No
row_459	173894	DiSHevelled related	null	null	13652	-0.319096	0.194719	No
row_460	177366	Uncharacterized protein	null	null	13659	-0.319497	0.196396	No
row_461	190487	hypothetical protein	null	null	13709	-0.322781	0.195696	No
row_462	181472	Cyclin-dependent kinase 4 homolog	null	null	13801	-0.329907	0.192676	No
row_463	176440	Coronin-like protein cor-1	null	null	13909	-0.33734	0.188772	No
row_464	171666	hypothetical protein	null	null	13936	-0.338985	0.189343	No
row_465	181261	Tyrosine-protein kinase abl-1	null	null	14069	-0.349191	0.184058	No
row_466	189606	human TORsin related	null	null	14079	-0.350028	0.185568	No
row_467	176229	Dwarfin sma-2	null	null	14357	-0.369296	0.172271	No
row_468	186492	Delta-like protein	null	null	14557	-0.384055	0.163283	No
row_469	176822	FERM domain (protein4.1-ezrin-radixin-moesin) family	null	null	14602	-0.387249	0.16286	No
row_470	181053	NIP3 homolog	null	null	14674	-0.39174	0.160945	No
row_471	182980	Helix Loop Helix	null	null	15089	-0.4189	0.140078	No
row_472	185024	Growth arrest-specific protein 1 homolog	null	null	15106	-0.420128	0.141202	No
row_473	181306	hypothetical protein	null	null	15129	-0.421553	0.141994	No
row_474	172863	Feminization Of Germline	null	null	15130	-0.421571	0.144002	No
row_475	171849	Protein pop-1	null	null	15209	-0.427948	0.1417	No
row_476	176970	Delta-like protein	null	null	15241	-0.430491	0.141995	No
row_477	171787	Ectopic P granules protein 2	null	null	15542	-0.456092	0.127427	No
row_478	180009	Zinc finger protein sdc-3	null	null	15673	-0.468275	0.122252	No
row_479	13185051	hypothetical protein	null	null	15805	-0.481536	0.117021	No
row_480	181003	COHesin family	null	null	16227	-0.528027	0.0957673	No
row_481	183881	F-box A protein	null	null	16466	-0.559923	0.0846247	No
row_482	176298	Protein CLASP-3	null	null	16476	-0.561704	0.0861354	No
row_483	177815	Caveolin	null	null	16575	-0.572896	0.0827285	No
row_484	183174	hypothetical protein	null	null	16690	-0.589398	0.0784375	No
row_485	181170	Tubulin beta-4 chain	null	null	16746	-0.597148	0.0774065	No
row_486	174935	LIPaSe related	null	null	16843	-0.618758	0.0741101	No
row_487	178063	Delta-like protein	null	null	17044	-0.666882	0.0650672	No
row_488	172251	Nuclear hormone receptor family member nhr-2	null	null	17120	-0.686787	0.0629311	No
row_489	180751	Mesodermal Lineage Specification	null	null	17197	-0.712968	0.0607398	No
row_490	181545	Histone H1.1	null	null	17474	-0.81367	0.0474975	No
row_491	180501	Delta-like protein	null	null	17540	-0.838928	0.045914	No
row_492	178496	SKp1 Related (ubiquitin ligase complex component)	null	null	17778	-0.967659	0.0348266	No
row_493	178493	SKp1 Related (ubiquitin ligase complex component)	null	null	17803	-0.980235	0.0355086	No
row_494	176938	Delta-like protein	null	null	17807	-0.985483	0.0373508	No
row_495	178755	Protein lag-2	null	null	17831	-0.998317	0.038088	No
row_496	176939	Delta-like protein	null	null	17952	-1.07454	0.0334655	No
row_497	184563	Delta-like protein	null	null	18081	-1.14391	0.0284009	No
NAME	CELL_CYCLE_PROCESS(4)	NA	GENE SYMBOL	GENE_TITLE	RANK IN GENE LIST	RANK METRIC SCORE	RUNNING ES	CORE ENRICHMENT
row_0	175753	LONg	null	null	299	1.40767	-0.0142669	Yes
row_1	175067	hypothetical protein	null	null	501	1.18665	-0.0231325	Yes
row_2	171960	Serine/threonine-protein phosphatase PP1-delta	null	null	788	1.03118	-0.0366829	Yes
row_3	172082	Serine/threonine-protein phosphatase PP1-gamma	null	null	928	0.963011	-0.0421315	Yes
row_4	183952	hypothetical protein	null	null	1041	0.908168	-0.0460919	Yes
row_5	177655	MEiotic SPindle	null	null	1154	0.857166	-0.0500524	Yes
row_6	172090	Kinesin Cargo Adaptor	null	null	1249	0.819954	-0.0530208	Yes
row_7	176061	ATP-dependent RNA helicase cgh-1	null	null	1258	0.816529	-0.0512493	Yes
row_8	3565532	hypothetical protein	null	null	1306	0.796733	-0.0516273	Yes
row_9	180304	Serine/threonine-protein kinase chk-2	null	null	1346	0.784121	-0.0515644	Yes
row_10	171745	Cyclin-dependent kinases regulatory subunit	null	null	1374	0.773477	-0.0508401	Yes
row_11	13191136	hypothetical protein	null	null	1401	0.764442	-0.0500607	Yes
row_12	172213	Kinesin-like protein	null	null	1402	0.764295	-0.0478483	Yes
row_13	174016	Fem-3 mRNA-binding factor 1	null	null	1419	0.756888	-0.0465177	Yes
row_14	172666	MoRTal germline	null	null	1531	0.715028	-0.0504231	Yes
row_15	172515	Piwi-like protein	null	null	1537	0.712901	-0.0484862	Yes
row_16	172532	Female germline-specific tumor suppressor gld-1	null	null	1538	0.712847	-0.0462739	Yes
row_17	172374	Meiotic spindle formation protein 2	null	null	1600	0.696098	-0.0474235	Yes
row_18	179586	Deubiquitylating with USP/UBP and OTU domains	null	null	1612	0.692629	-0.0458173	Yes
row_19	174157	MutS protein homolog him-14	null	null	1654	0.682692	-0.0458646	Yes
row_20	177461	P granule abnormality protein 1	null	null	1693	0.668705	-0.0457466	Yes
row_21	172786	hypothetical protein	null	null	1831	0.630181	-0.0510849	Yes
row_22	171838	Serine/threonine-protein kinase plk-2	null	null	1860	0.620194	-0.0504157	Yes
row_23	173158	Cytokinesis, Apoptosis, RNA-associated	null	null	1864	0.619669	-0.0483687	Yes
row_24	177462	High Incidence of Males (increased X chromosome loss)	null	null	1886	0.613376	-0.0473137	Yes
row_25	175776	X chromosome NonDisjunction factor	null	null	1887	0.613239	-0.0451013	Yes
row_26	175388	CrossOver Site Associated	null	null	1891	0.612943	-0.0430543	Yes
row_27	175991	Chondroitin proteoglycan-2	null	null	1895	0.611113	-0.0410072	Yes
row_28	177995	Uncharacterized protein	null	null	1956	0.596014	-0.0421017	Yes
row_29	259571	Him-Three Paralog	null	null	1966	0.591486	-0.0403854	Yes
row_30	174196	hypothetical protein	null	null	1975	0.587055	-0.0386139	Yes
row_31	183192	hypothetical protein	null	null	1992	0.583754	-0.0372833	Yes
row_32	178210	Protein let-99	null	null	2032	0.577752	-0.0372204	Yes
row_33	180102	hypothetical protein	null	null	2056	0.574177	-0.0362757	Yes
row_34	172524	Enhancer of Glp-One (glp-1)	null	null	2062	0.571699	-0.0343389	Yes
row_35	186223	Histone H3-like centromeric protein cpar-1	null	null	2082	0.566737	-0.0331736	Yes
row_36	176230	5'-AMP-activated protein kinase catalytic subunit alpha-1	null	null	2103	0.563608	-0.0320635	Yes
row_37	172784	Kinesin-like protein	null	null	2105	0.563447	-0.0299063	Yes
row_38	190809	High Incidence of Males (increased X chromosome loss)	null	null	2109	0.562705	-0.0278592	Yes
row_39	175586	Chondroitin proteoglycan 1	null	null	2132	0.556955	-0.0268594	Yes
row_40	174197	PUF (Pumilio/FBF) domain-containing	null	null	2177	0.548309	-0.027072	Yes
row_41	178295	Meiotic recombination protein rec-8	null	null	2179	0.547926	-0.0249147	Yes
row_42	172099	Him-Three Paralog	null	null	2255	0.529446	-0.0268359	Yes
row_43	172399	G1/S-specific cyclin-E	null	null	2273	0.526389	-0.0255605	Yes
row_44	171912	Separin homolog sep-1	null	null	2287	0.524619	-0.0240646	Yes
row_45	174566	Oocyte and Germ-line Related	null	null	2300	0.522934	-0.0225136	Yes
row_46	182160	Long Arms of the Bivalent protein	null	null	2329	0.519081	-0.0218444	Yes
row_47	173635	Beta-1,3-galactosyltransferase sqv-2	null	null	2409	0.50795	-0.0239861	Yes
row_48	172667	hypothetical protein	null	null	2412	0.507573	-0.0218839	Yes
row_49	172533	Glucosamine phosphate N-Acetyl transferase	null	null	2415	0.507279	-0.0197818	Yes
row_50	259363	hypothetical protein	null	null	2469	0.498466	-0.0204904	Yes
row_51	172660	CalPoNin	null	null	2483	0.496079	-0.0189945	Yes
row_52	176092	Cytokinesis defective protein 7	null	null	2532	0.486852	-0.0194277	Yes
row_53	171895	Feminization Of Germline	null	null	2539	0.485211	-0.017546	Yes
row_54	177474	Kinesin-like protein	null	null	2554	0.482882	-0.0161052	Yes
row_55	179488	Double-strand break repair protein mre-11	null	null	2585	0.477117	-0.0155462	Yes
row_56	176511	Kinesin-like protein	null	null	2589	0.47639	-0.0134992	Yes
row_57	179949	COHesin family	null	null	2606	0.472624	-0.0121686	Yes
row_58	174799	hypothetical protein	null	null	2615	0.471527	-0.0103972	Yes
row_59	171786	TPX2 (Targeting Protein for Xenopus Klp2)-Like	null	null	2646	0.466626	-0.0098382	Yes
row_60	178201	Bloom syndrome protein homolog	null	null	2685	0.459463	-0.00972017	Yes
row_61	172830	Ribonuclease 3	null	null	2730	0.451226	-0.00993282	Yes
row_62	179802	Sun domain-containing protein 1	null	null	2781	0.444031	-0.0104762	Yes
row_63	172329	Importin subunit alpha-2	null	null	2793	0.442328	-0.00887004	Yes
row_64	176750	Kinesin-like protein	null	null	2794	0.441672	-0.00665765	Yes
row_65	174174	Defective in germ line development protein 3	null	null	2818	0.437264	-0.0057129	Yes
row_66	175443	Nuclear Pore complex Protein	null	null	2841	0.434472	-0.00471303	Yes
row_67	173869	Leucine-Rich Repeat protein	null	null	2900	0.423447	-0.00569729	Yes
row_68	187005	MUTator	null	null	2919	0.419843	-0.00447696	Yes
row_69	172353	M-phase inducer phosphatase cdc-25.1	null	null	2955	0.415785	-0.00419359	Yes
row_70	172712	Spindle-defective protein 2	null	null	2959	0.415381	-0.00214654	Yes
row_71	178268	MSH (MutS Homolog) family	null	null	3003	0.409148	-0.00230408	Yes
row_72	176065	Telomere length regulation protein clk-2	null	null	3011	0.408612	-0.000477493	Yes
row_73	177647	Putative syntaxin-4	null	null	3077	0.399078	-0.00184756	Yes
row_74	173161	Profilin-1	null	null	3087	0.398269	-0.000131198	Yes
row_75	191632	ADP-ribosylation factor-like protein 2	null	null	3096	0.397485	0.00164027	Yes
row_76	173947	hypothetical protein	null	null	3123	0.393164	0.00241968	Yes
row_77	175962	BRCa homolog (tumor suppressor gene Brca1)	null	null	3165	0.386904	0.00237237	Yes
row_78	178007	Kinesin Light Chain	null	null	3176	0.385404	0.00403362	Yes
row_79	175499	BRCa homolog (tumor suppressor gene Brca1)	null	null	3181	0.38491	0.00602555	Yes
row_80	171798	Protein zwilch homolog	null	null	3207	0.38093	0.00686007	Yes
row_81	173872	Securin-like protein	null	null	3238	0.376895	0.00741902	Yes
row_82	178938	hypothetical protein	null	null	3308	0.368567	0.0058285	Yes
row_83	174017	Fem-3 mRNA-binding factor 2	null	null	3313	0.368173	0.00782043	Yes
row_84	183189	ShuGOshin (yeast chromosome segregation protein) homolog	null	null	3315	0.367905	0.0099777	Yes
row_85	174658	ECT2 (mammalian Rho GEF) homolog	null	null	3316	0.367811	0.0121901	Yes
row_86	173808	Sister chromatid cohesion protein 1	null	null	3325	0.367	0.0139616	Yes
row_87	183841	URI (Unconventional prefoldin RPB5 Interactor) homolog	null	null	3335	0.365528	0.0156779	Yes
row_88	174332	Regulator of chromosome condensation	null	null	3353	0.363408	0.0169534	Yes
row_89	177520	Kinetochore-associated protein rod-1	null	null	3361	0.362619	0.01878	Yes
row_90	172773	SKp1 Related (ubiquitin ligase complex component)	null	null	3399	0.359156	0.0189531	Yes
row_91	178507	Heat shock 70 kDa protein A	null	null	3400	0.358785	0.0211655	Yes
row_92	190099	SQuashed Vulva	null	null	3427	0.355979	0.0219449	Yes
row_93	172155	Spindle-defective protein 5	null	null	3436	0.35512	0.0237164	Yes
row_94	171656	hypothetical protein	null	null	3439	0.354855	0.0258185	Yes
row_95	174288	Actin-like protein C08B11.6	null	null	3441	0.354677	0.0279758	Yes
row_96	183250	yeast PRP (splicing factor) related	null	null	3464	0.351493	0.0289757	Yes
row_97	172644	Zip (yeast meiotic zipper) Homologous Protein	null	null	3550	0.343286	0.0265033	Yes
row_98	176064	Protein CLASP-1	null	null	3574	0.34084	0.0274481	Yes
row_99	179678	DNA repair protein rad-50	null	null	3631	0.335449	0.026574	Yes
row_100	174386	PhosphatidylInositol-Glycan biosynthesis class A protein	null	null	3677	0.330733	0.0263063	Yes
row_101	171675	G Protein, Alpha subunit	null	null	3735	0.324868	0.0253771	Yes
row_102	172242	Histone H1.5	null	null	3737	0.324728	0.0275344	Yes
row_103	178759	Anterior Pharynx in eXcess	null	null	3741	0.324395	0.0295814	Yes
row_104	176361	Tubulin gamma chain	null	null	3776	0.320576	0.0299199	Yes
row_105	179352	ATM (ataxia telangectasia mutated)-Like	null	null	3781	0.320406	0.0319119	Yes
row_106	172562	Non-muscle MYosin	null	null	3787	0.319906	0.0338487	Yes
row_107	172342	hypothetical protein	null	null	3795	0.319348	0.0356753	Yes
row_108	179237	hypothetical protein	null	null	3798	0.319311	0.0377774	Yes
row_109	179353	HoloCentric chromosome binding Protein	null	null	3812	0.318165	0.0392733	Yes
row_110	176652	Protein timeless homolog	null	null	3846	0.314643	0.0396669	Yes
row_111	179202	Aurora/Ipl1 Related kinase	null	null	3892	0.310809	0.0393992	Yes
row_112	179117	hypothetical protein	null	null	3897	0.310501	0.0413911	Yes
row_113	178345	Spindle assembly abnormal protein 6	null	null	3927	0.307007	0.0420052	Yes
row_114	176286	Protein glp-1	null	null	3966	0.304158	0.0421232	Yes
row_115	171964	HoloCentric chromosome binding Protein	null	null	3983	0.302359	0.0434538	Yes
row_116	172612	Meiotic spindle formation protein mei-1	null	null	4030	0.298024	0.0431309	Yes
row_117	171950	PaTched Related family	null	null	4031	0.29802	0.0453433	Yes
row_118	172586	Cell Division Cycle related	null	null	4083	0.294169	0.0447448	Yes
row_119	180185	Serine/threonine-protein kinase par-4	null	null	4107	0.292193	0.0456896	Yes
row_120	172473	hypothetical protein	null	null	4136	0.289138	0.0463587	Yes
row_121	171683	hypothetical protein	null	null	4145	0.288164	0.0481302	Yes
row_122	183932	High Incidence of Males (increased X chromosome loss)	null	null	4157	0.28626	0.0497363	Yes
row_123	266650	NEDD8-activating enzyme E1 regulatory subunit	null	null	4163	0.286095	0.0516731	Yes
row_124	175885	GEN1 Holliday junction resolvase homolog	null	null	4172	0.285407	0.0534446	Yes
row_125	177914	Uncharacterized protein	null	null	4243	0.281661	0.051799	Yes
row_126	172682	Germline survival defective-1	null	null	4263	0.279905	0.0529642	Yes
row_127	179227	DNaJ domain (prokaryotic heat shock protein)	null	null	4322	0.276198	0.0519799	Yes
row_128	171657	hypothetical protein	null	null	4330	0.275414	0.0538065	Yes
row_129	175818	DEAD boX helicase homolog	null	null	4336	0.274782	0.0557433	Yes
row_130	176639	Serine/threonine-protein kinase zyg-8	null	null	4358	0.273219	0.0567983	Yes
row_131	172783	SMN (human Survival Motor Neuron gene) homolog	null	null	4379	0.272088	0.0579084	Yes
row_132	179443	Pre-mRNA-splicing factor SLU7	null	null	4447	0.267268	0.0564281	Yes
row_133	186560	F-box A protein	null	null	4496	0.263124	0.055995	Yes
row_134	183199	Putative serine/threonine-protein phosphatase pph-6	null	null	4497	0.263062	0.0582074	Yes
row_135	172616	Transcription factor cep-1	null	null	4503	0.262729	0.0601442	Yes
row_136	173874	Structural maintenance of chromosomes protein 5	null	null	4514	0.26178	0.0618055	Yes
row_137	188142	Paired Zinc Finger protein	null	null	4535	0.260769	0.0629156	Yes
row_138	172886	Serine/threonine-protein phosphatase 2A regulatory subunit rsa-1	null	null	4564	0.257666	0.0635847	Yes
row_139	176816	E3 ubiquitin-protein ligase parkin	null	null	4621	0.253709	0.0627107	Yes
row_140	176392	ADP-ribosylation factor-like protein 5	null	null	4630	0.252834	0.0644822	Yes
row_141	173369	hypothetical protein	null	null	4643	0.252004	0.0660332	Yes
row_142	173370	Deletions Of G-rich DNA	null	null	4665	0.250037	0.0670882	Yes
row_143	176359	Histone H3-like centromeric protein hcp-3	null	null	4672	0.249534	0.0689699	Yes
row_144	176266	BUD13 homolog	null	null	4686	0.248188	0.0704658	Yes
row_145	179592	Spindle assembly abnormal protein 5	null	null	4729	0.244329	0.0703634	Yes
row_146	172662	hypothetical protein	null	null	4734	0.244141	0.0723553	Yes
row_147	173124	HMG	null	null	4756	0.242546	0.0734103	Yes
row_148	176503	GTP-binding nuclear protein ran-1	null	null	4812	0.238403	0.0725913	Yes
row_149	172782	Ubiquitin carboxyl-terminal hydrolase	null	null	4839	0.237063	0.0733708	Yes
row_150	174759	hypothetical protein	null	null	4854	0.236209	0.0748115	Yes
row_151	174261	CKI family (Cyclin-dependent Kinase Inhibitor)	null	null	4873	0.234627	0.0760319	Yes
row_152	176138	Endoribonuclease dcr-1	null	null	4903	0.232247	0.0766459	Yes
row_153	177873	Kinetochore protein ndc-80	null	null	4904	0.232223	0.0788583	Yes
row_154	172598	Maternal uncoordinated protein 2	null	null	4956	0.228821	0.0782599	Yes
row_155	173956	Probable serine/threonine-protein kinase zyg-1	null	null	5014	0.224379	0.0773307	Yes
row_156	174350	Zygote defective protein 9	null	null	5062	0.221774	0.0769527	Yes
row_157	176115	Ran GTPase-activating protein 2	null	null	5108	0.218637	0.076685	Yes
row_158	172041	Dynein Heavy Chain	null	null	5109	0.218588	0.0788973	Yes
row_159	175604	Anaphase-promoting complex subunit 11	null	null	5152	0.216156	0.0787949	Yes
row_160	176868	3'-5' exonuclease eri-1	null	null	5183	0.213932	0.0793539	Yes
row_161	175275	hypothetical protein	null	null	5217	0.211649	0.0797475	Yes
row_162	183040	hypothetical protein	null	null	5241	0.210269	0.0806922	Yes
row_163	176507	RING finger protein 113 homolog	null	null	5253	0.209016	0.0822984	Yes
row_164	179800	High Incidence of Males (increased X chromosome loss)	null	null	5277	0.207825	0.0832431	Yes
row_165	186851	hypothetical protein	null	null	5355	0.202596	0.0812117	Yes
row_166	174698	Anaphase-promoting complex subunit 1	null	null	5374	0.201507	0.082432	Yes
row_167	176143	Serine/threonine-protein kinase plk-1	null	null	5413	0.199141	0.08255	Yes
row_168	190203	hypothetical protein	null	null	5431	0.197983	0.0838255	Yes
row_169	173329	Nuclear Pore complex Protein	null	null	5444	0.19675	0.0853765	Yes
row_170	173072	NEDD8-conjugating enzyme ubc-12	null	null	5464	0.195638	0.0865417	Yes
row_171	172146	yeast PRP (splicing factor) related	null	null	5476	0.194943	0.0881478	Yes
row_172	177683	Poly Adp-Ribose (ADP-ribose) Glycohydrolase	null	null	5521	0.192943	0.0879352	Yes
row_173	175813	Kinetochore protein Nuf2 homolog	null	null	5530	0.192325	0.0897066	Yes
row_174	174674	Peptidyl-prolyl cis-trans isomerase 4	null	null	5540	0.191881	0.091423	Yes
row_175	171752	Emerin homolog 1	null	null	5555	0.191143	0.0928638	Yes
row_176	174551	hypothetical protein	null	null	5572	0.190374	0.0941943	Yes
row_177	175066	Cactin	null	null	5603	0.18859	0.0947533	Yes
row_178	175850	Germ Cell Nuclear Antigen	null	null	5642	0.186169	0.0948713	Yes
row_179	176010	hypothetical protein	null	null	5704	0.182363	0.0937217	Yes
row_180	176661	proteasome Regulatory Particle, ATPase-like	null	null	5725	0.181516	0.0948318	Yes
row_181	176927	COP9 signalosome complex subunit 4	null	null	5726	0.18147	0.0970442	Yes
row_182	179338	MAD (yeast Mitosis arrest DeFicient) related	null	null	5740	0.180958	0.0985401	Yes
row_183	174535	NanOS related	null	null	5782	0.179204	0.0984928	Yes
row_184	173373	hypothetical protein	null	null	5801	0.177831	0.0997131	Yes
row_185	176200	ES2 similar protein 2	null	null	5814	0.177105	0.101264	Yes
row_186	178146	Tat-binding homolog 7	null	null	5829	0.176699	0.102705	Yes
row_187	171954	Nuclear Pore complex Protein	null	null	5888	0.173011	0.101721	Yes
row_188	175603	Structural maintenance of chromosomes protein 4	null	null	5940	0.170859	0.101122	Yes
row_189	174430	Suppressor of ZYg-1	null	null	5983	0.168556	0.10102	Yes
row_190	4363023	Splicing factor 3B subunit 4	null	null	6002	0.167439	0.10224	Yes
row_191	173233	hypothetical protein	null	null	6016	0.166177	0.103736	Yes
row_192	172338	Poly(A) RNA polymerase gld-2	null	null	6017	0.166158	0.105948	Yes
row_193	171888	Vasa-and Belle-like Helicase	null	null	6032	0.165436	0.107389	Yes
row_194	176608	MoRTal germline	null	null	6045	0.164743	0.10894	Yes
row_195	174600	STIP (Septin and Tuftelin Interacting Protein) homolog	null	null	6077	0.163269	0.109444	Yes
row_196	174158	NanOS related	null	null	6084	0.162668	0.111326	Yes
row_197	177895	Guanine nucleotide-binding protein subunit beta-2-like 1	null	null	6124	0.160202	0.111389	Yes
row_198	175117	Masculinisation Of Germline	null	null	6201	0.155637	0.109412	Yes
row_199	174823	Nuclear Pore complex Protein	null	null	6213	0.154835	0.111018	Yes
row_200	175133	Transforming acid coiled-coil-containing protein 1	null	null	6226	0.153906	0.112569	Yes
row_201	173410	Nipped-B-like protein pqn-85	null	null	6320	0.149377	0.109656	Yes
row_202	172330	Heterogeneous nuclear RibonucleoProtein (HnRNP) K homolog	null	null	6327	0.148975	0.111538	Yes
row_203	174267	Spindle apparatus protein lin-5	null	null	6336	0.148391	0.113309	Yes
row_204	176183	Histone-lysine N-methyltransferase met-2	null	null	6344	0.147905	0.115136	Yes
row_205	176748	Nucleoporin SEH1	null	null	6352	0.147542	0.116963	Yes
row_206	176615	MIF (Macrophage migration Inhibitory Factor) related	null	null	6364	0.146946	0.118569	Yes
row_207	173920	Probable pre-mRNA-splicing factor ATP-dependent RNA helicase mog-5	null	null	6396	0.145649	0.119073	Yes
row_208	185482	Mps One Binder (Mats/MOB1) homolog	null	null	6478	0.141467	0.116821	Yes
row_209	172999	yeast PRP (splicing factor) related	null	null	6493	0.140678	0.118261	Yes
row_210	175837	Probable dynactin subunit 2	null	null	6515	0.139877	0.119316	Yes
row_211	172268	Aurora/IPL1-related protein kinase 2	null	null	6518	0.13975	0.121419	Yes
row_212	179274	Germinal Center Kinase family	null	null	6527	0.13918	0.12319	Yes
row_213	180168	COP9 signalosome complex subunit 1	null	null	6542	0.138371	0.124631	Yes
row_214	179049	HoloCentric chromosome binding Protein	null	null	6549	0.137957	0.126512	Yes
row_215	179749	Cohesin subunit scc-3	null	null	6552	0.137835	0.128615	Yes
row_216	189237	DAF-16/FOXO Controlled, germline Tumor affecting	null	null	6553	0.13777	0.130827	Yes
row_217	179217	Protein mom-2	null	null	6556	0.137452	0.132929	Yes
row_218	176280	CLASP family of microtubule-binding proteins	null	null	6574	0.136348	0.134205	Yes
row_219	175545	Mitogen-activated protein kinase mpk-1	null	null	6586	0.135949	0.135811	Yes
row_220	175210	HELicase Q homolog	null	null	6596	0.135414	0.137527	Yes
row_221	176834	COP9 signalosome complex subunit 3	null	null	6612	0.134603	0.138913	Yes
row_222	179413	Cullin-5	null	null	6618	0.134378	0.14085	Yes
row_223	178289	COP-9 SigNalosome subunit	null	null	6626	0.133898	0.142676	Yes
row_224	179358	RING-box protein 1	null	null	6638	0.133262	0.144282	Yes
row_225	176815	CYtoKinesis defect	null	null	6641	0.13312	0.146384	Yes
row_226	179534	Actin-2	null	null	6655	0.132427	0.14788	Yes
row_227	176374	Cyclin-dependent kinase 1	null	null	6671	0.13154	0.149266	Yes
row_228	174579	hypothetical protein	null	null	6693	0.130355	0.150321	Yes
row_229	176172	Spindle assembly abnormal protein 4	null	null	6702	0.130051	0.152093	Yes
row_230	177840	Uncharacterized protein	null	null	6726	0.128618	0.153037	Yes
row_231	177988	LSM Sm-like protein	null	null	6740	0.128067	0.154533	Yes
row_232	173167	Tubulin alpha-2 chain	null	null	6742	0.127961	0.15669	Yes
row_233	177987	DyNactin Complex component	null	null	6854	0.121025	0.152785	Yes
row_234	174314	Cell division cycle protein 16 homolog	null	null	6870	0.119638	0.154171	Yes
row_235	191526	Methyltransferase-like protein 16 homolog	null	null	6906	0.117461	0.154454	Yes
row_236	175900	THO Complex (transcription factor/nuclear export) subunit	null	null	6908	0.117432	0.156611	Yes
row_237	179027	Gastrulation defective protein 1	null	null	6917	0.116795	0.158383	Yes
row_238	174317	Segment polarity protein dishevelled homolog mig-5	null	null	6927	0.116507	0.160099	Yes
row_239	179709	AcTiniN	null	null	6982	0.11407	0.159335	Yes
row_240	173767	Probable U2 small nuclear ribonucleoprotein A'	null	null	6984	0.113803	0.161493	Yes
row_241	171774	Nuclear pore protein	null	null	7003	0.112452	0.162713	Yes
row_242	172826	Serine/threonine-protein phosphatase 2A regulatory subunit sur-6	null	null	7015	0.111844	0.164319	Yes
row_243	176409	Probable pre-mRNA-splicing factor ATP-dependent RNA helicase mog-1	null	null	7023	0.111555	0.166146	Yes
row_244	176536	Regulator of spindle assembly protein 2	null	null	7025	0.111536	0.168303	Yes
row_245	177824	mRNA transport homolog 4	null	null	7072	0.109085	0.16798	Yes
row_246	171911	Cyclin-Dependent Kinase family	null	null	7091	0.108212	0.1692	Yes
row_247	266859	WD repeat-containing protein fzy-1	null	null	7153	0.104943	0.168051	Yes
row_248	177342	COP9 signalosome complex subunit 5	null	null	7159	0.104613	0.169988	Yes
row_249	174150	TransCription Elongation Regulator homolog	null	null	7195	0.102584	0.170271	Yes
row_250	172761	Protein Phosphatase Four Regulatory subunit	null	null	7262	0.0991755	0.168846	Yes
row_251	177181	RNP (RRM RNA binding domain) containing	null	null	7268	0.0988782	0.170783	Yes
row_252	172145	Cell division cycle protein 27 homolog	null	null	7285	0.0977598	0.172113	Yes
row_253	175783	Partitioning defective protein 3	null	null	7331	0.0954433	0.171846	Yes
row_254	176758	Lissencephaly-1 homolog	null	null	7344	0.0949036	0.173397	Yes
row_255	177456	Dolichyl-diphosphooligosaccharide--protein glycosyltransferase subunit 1	null	null	7371	0.0932223	0.174176	Yes
row_256	173225	CYclophyliN	null	null	7381	0.0925121	0.175892	Yes
row_257	178113	14-3-3-like protein 1	null	null	7434	0.0888396	0.175239	Yes
row_258	172856	Protein mom-5	null	null	7467	0.0872625	0.175687	Yes
row_259	174725	SAPS (phosphatase associated) domain protein	null	null	7487	0.085843	0.176853	Yes
row_260	175802	Armadillo repeat-containing protein wrm-1	null	null	7560	0.0816551	0.175097	Yes
row_261	175006	Chromosome segregation and cytokinesis defective protein 1	null	null	7598	0.0792838	0.17527	Yes
row_262	174233	Cell division control protein 42 homolog	null	null	7600	0.0789491	0.177427	Yes
row_263	175018	Mitotic checkpoint protein bub-3	null	null	7608	0.0783075	0.179254	Yes
row_264	176697	Probable actin-related protein 2/3 complex subunit 3	null	null	7620	0.0774159	0.18086	Yes
row_265	173341	DNaJ domain (prokaryotic heat shock protein)	null	null	7661	0.0753062	0.180868	Yes
row_266	172092	Replication Protein A homolog	null	null	7674	0.0746136	0.182419	Yes
row_267	172406	Tumorous Enhancer of Glp-1(gf)	null	null	7690	0.0736172	0.183804	Yes
row_268	176702	human MRG (Mortality factor-Related Gene) related	null	null	7692	0.0732238	0.185962	Yes
row_269	172116	Structural maintenance of chromosomes protein 1	null	null	7701	0.0727308	0.187733	Yes
row_270	177658	Cyclin-dependent kinases regulatory subunit	null	null	7788	0.0688049	0.185206	Yes
row_271	182257	Thioredoxin domain-containing protein 9	null	null	7792	0.0685639	0.187253	Yes
row_272	179853	LiPIN (mammalian lipodystrophy associated) homolog	null	null	7801	0.0681039	0.189024	Yes
row_273	171788	InCenP homolog	null	null	7813	0.0675581	0.19063	Yes
row_274	266854	DiSHevelled related	null	null	7825	0.0670366	0.192236	Yes
row_275	266845	Dauer or Aging adult Overexpression	null	null	7833	0.0666852	0.194063	Yes
row_276	173137	Partitioning defective protein 6	null	null	7908	0.0631243	0.192197	Yes
row_277	176501	Tubulin beta chain	null	null	7945	0.061295	0.192425	Yes
row_278	175555	hypothetical protein	null	null	7995	0.0583449	0.191937	Yes
row_279	175959	BRCA1-associated RING domain protein 1	null	null	8023	0.0568378	0.192661	Yes
row_280	176806	Cullin-2	null	null	8026	0.0567376	0.194763	Yes
row_281	172249	Retinoblastoma-like protein homolog lin-35	null	null	8084	0.0533594	0.193834	Yes
row_282	176009	Ectopic P granules protein 4	null	null	8085	0.053224	0.196047	Yes
row_283	171922	RNP (RRM RNA binding domain) containing	null	null	8220	0.0456133	0.190874	Yes
row_284	176672	Anillin-like protein 1	null	null	8238	0.0447692	0.192149	Yes
row_285	177046	MAD (yeast Mitosis arrest DeFicient) related	null	null	8240	0.0447133	0.194306	Yes
row_286	176318	G-protein regulator 2	null	null	8279	0.0425621	0.194424	Yes
row_287	172521	Condensin complex subunit capg-1	null	null	8321	0.0402945	0.194377	Yes
row_288	174901	Putative U5 small nuclear ribonucleoprotein 200 kDa helicase	null	null	8352	0.0382083	0.194936	Yes
row_289	177533	Importin subunit alpha-3	null	null	8368	0.0373015	0.196322	Yes
row_290	172278	COP9 signalosome complex subunit 2	null	null	8377	0.0368639	0.198093	Yes
row_291	173440	yeast PRP (splicing factor) related	null	null	8417	0.0345575	0.198156	Yes
row_292	176158	Mps One Binder (Mats/MOB1) homolog	null	null	8426	0.0343366	0.199928	Yes
row_293	180904	Protein-serine O-palmitoleoyltransferase porcupine	null	null	8429	0.0341804	0.20203	Yes
row_294	177979	RNA Binding Motif protein homolog	null	null	8575	0.025345	0.196251	Yes
row_295	266885	KNL (kinetochore null) Binding Protein	null	null	8576	0.0251584	0.198463	Yes
row_296	177836	Nuclear Pore complex Protein	null	null	8631	0.0215449	0.197699	Yes
row_297	174364	hypothetical protein	null	null	8656	0.0203271	0.198589	Yes
row_298	172981	Forkhead box protein O	null	null	8662	0.01967	0.200526	Yes
row_299	176328	SR Protein Kinase	null	null	8681	0.0184091	0.201746	Yes
row_300	175549	Splicing Factor ThreeB (3b) Subunit homolog	null	null	8693	0.0178004	0.203352	Yes
row_301	172110	IMportin Beta family	null	null	8699	0.0173683	0.205289	Yes
row_302	179597	BIR (baculovirus inhibitory repeat) family	null	null	8774	0.0127088	0.203423	Yes
row_303	184953	Nuclear cap-binding protein subunit 2	null	null	8777	0.012617	0.205525	Yes
row_304	175519	Tubulin beta-2 chain	null	null	8791	0.0116868	0.207021	Yes
row_305	178563	LIPase Like	null	null	8793	0.0115604	0.209178	Yes
row_306	179684	CAP-G condensin subunit	null	null	8829	0.00928153	0.209461	Yes
row_307	176464	hypothetical protein	null	null	8838	0.00880476	0.211233	Yes
row_308	172591	APC Related	null	null	8854	0.00715237	0.212619	Yes
row_309	171927	human/fission yeast MIS (MInichromosome Stability) homolog	null	null	8876	0.00593578	0.213674	Yes
row_310	172746	hypothetical protein	null	null	8933	0.0032998	0.2128	Yes
row_311	175971	hypothetical protein	null	null	8950	0.00216894	0.21413	Yes
row_312	179833	hypothetical protein	null	null	8960	0.00147469	0.215846	Yes
row_313	175281	SMN (Survival of Motor Neuron protein) Related	null	null	8965	0.00103689	0.217838	Yes
row_314	172677	Cyclin-dependent kinase 8	null	null	8968	0.000868747	0.219941	Yes
row_315	176446	Annexin	null	null	8975	0.000497221	0.221822	Yes
row_316	172089	VILliN related	null	null	9000	-0.0010278	0.222712	Yes
row_317	178057	Kinesin-Like Protein	null	null	9012	-0.00205927	0.224318	Yes
row_318	176116	Condensin-2 complex subunit kle-2	null	null	9016	-0.00231108	0.226365	Yes
row_319	180047	LSM Sm-like protein	null	null	9024	-0.00316223	0.228192	Yes
row_320	179243	SMEK (Dictyostelium Suppressor of MEK null) homolog	null	null	9030	-0.00340181	0.230129	Yes
row_321	176796	Myosin-2 essential light chain	null	null	9064	-0.00526015	0.230522	Yes
row_322	176003	Pre-mRNA-splicing factor syf-2	null	null	9114	-0.00925479	0.230034	Yes
row_323	175983	CYtoKinesis defect	null	null	9121	-0.00971799	0.231916	Yes
row_324	178196	Condensin complex subunit dpy-26	null	null	9199	-0.0148525	0.229884	Yes
row_325	179948	Kinesin-like protein	null	null	9200	-0.0148736	0.232097	Yes
row_326	176548	Sex-determining transformer protein 1	null	null	9213	-0.0157812	0.233648	Yes
row_327	176509	Condensin complex subunit 1	null	null	9229	-0.0169044	0.235033	Yes
row_328	177710	Cleavage Factor IM (CFIm) homolog	null	null	9236	-0.0175074	0.236915	Yes
row_329	178079	Slit-Robo GAP homolog	null	null	9273	-0.0203528	0.237143	Yes
row_330	175244	RNP (RRM RNA binding domain) containing	null	null	9274	-0.0205262	0.239356	Yes
row_331	176164	Kinetochore null protein 1	null	null	9296	-0.0223176	0.240411	Yes
row_332	176466	Cullin-1	null	null	9359	-0.0267467	0.239206	Yes
row_333	175020	Protein wntless homolog	null	null	9373	-0.0279452	0.240702	Yes
row_334	172687	Lamin-1	null	null	9401	-0.0301247	0.241426	Yes
row_335	178117	Serine/threonine-protein phosphatase 2A catalytic subunit	null	null	9405	-0.0302805	0.243473	Yes
row_336	177325	SWI/SNF nucleosome remodeling complex component	null	null	9418	-0.0312448	0.245024	Yes
row_337	171601	Ras-related protein rab-11.1	null	null	9452	-0.0334202	0.245418	Yes
row_338	177190	DNA-directed RNA polymerase II subunit RPB1	null	null	9464	-0.0342897	0.247024	Yes
row_339	176625	CCR4-NOT transcription complex subunit 7	null	null	9525	-0.0394368	0.245929	Yes
row_340	175750	Probable serine/threonine-protein phosphatase PP2A regulatory subunit	null	null	9531	-0.0398471	0.247866	Yes
row_341	174284	Early embryogenesis protein zyg-11	null	null	9532	-0.0399756	0.250079	Yes
row_342	175440	Myosin regulatory light chain	null	null	9581	-0.0437412	0.249645	Yes
row_343	176465	Ataxin-2 homolog	null	null	9592	-0.0447082	0.251307	Yes
row_344	178537	1-phosphatidylinositol 4,5-bisphosphate phosphodiesterase beta egl-8	null	null	9672	-0.0492959	0.249165	Yes
row_345	177602	Sensory AXon guidance	null	null	9678	-0.0496185	0.251102	Yes
row_346	176210	G-protein regulator 1	null	null	9700	-0.0511198	0.252157	Yes
row_347	3564807	Serine/threonine-protein phosphatase PP1-beta	null	null	9702	-0.0511819	0.254314	Yes
row_348	176657	Serine/threonine-protein phosphatase 4 catalytic subunit 1	null	null	9727	-0.0527943	0.255204	Yes
row_349	176179	Kinesin heavy chain	null	null	9732	-0.0530698	0.257196	Yes
row_350	174673	F-actin-capping protein subunit beta	null	null	9759	-0.0552395	0.257975	Yes
row_351	177374	Kinesin-like protein	null	null	9780	-0.0569951	0.259085	Yes
row_352	172755	RAB family	null	null	9817	-0.0607623	0.259313	Yes
row_353	179524	ISY splicing factor homolog	null	null	9879	-0.0647499	0.258164	Yes
row_354	177048	Synembryn	null	null	9907	-0.0666393	0.258888	Yes
row_355	184980	hypothetical protein	null	null	9911	-0.0668923	0.260935	Yes
row_356	175270	Splicing factor U2AF 65 kDa subunit	null	null	10006	-0.0734396	0.257967	Yes
row_357	176706	Disintegrin and metalloproteinase domain-containing protein unc-71	null	null	10109	-0.0797215	0.254557	Yes
row_358	175556	Defective in cullin neddylation protein 1	null	null	10175	-0.0835791	0.253187	Yes
row_359	175058	LEM protein 2	null	null	10190	-0.0851557	0.254628	Yes
row_360	173073	Protein mago nashi homolog	null	null	10219	-0.0869065	0.255297	Yes
row_361	175464	Protein lag-3	null	null	10256	-0.089426	0.255526	Yes
row_362	175524	Casein kinase I isoform alpha	null	null	10279	-0.0913237	0.256526	Yes
row_363	178486	Splicing FActor	null	null	10300	-0.0928812	0.257636	Yes
row_364	190485	hypothetical protein	null	null	10349	-0.096545	0.257202	Yes
row_365	174516	FiZzy Related family	null	null	10351	-0.0967458	0.25936	Yes
row_366	175272	Ras-related protein Rab-18	null	null	10357	-0.0970594	0.261297	Yes
row_367	174659	Histone RNA hairpin-binding protein	null	null	10363	-0.0974474	0.263233	Yes
row_368	174669	Mitotic chromosome and X-chromosome-associated protein mix-1	null	null	10368	-0.0976396	0.265225	Yes
row_369	175662	Histone-lysine N-methyltransferase set-2	null	null	10384	-0.0993372	0.266611	Yes
row_370	172208	Dolichyl-diphosphooligosaccharide--protein glycosyltransferase subunit 2	null	null	10432	-0.103378	0.266233	No
row_371	180040	G2/mitotic-specific cyclin-B3	null	null	10504	-0.108175	0.264532	No
row_372	174256	Spindly-like protein spdl-1	null	null	10524	-0.10938	0.265697	No
row_373	185424	hypothetical protein	null	null	10671	-0.119145	0.259863	No
row_374	266847	DNA topoisomerase 1	null	null	10757	-0.12474	0.257391	No
row_375	178250	Dual specificity tyrosine-phosphorylation-regulated kinase mbk-2	null	null	10758	-0.124784	0.259603	No
row_376	173287	Axin-like protein pry-1	null	null	10776	-0.125606	0.260879	No
row_377	172831	Tubulin alpha chain	null	null	10778	-0.125665	0.263036	No
row_378	173945	Cell Division Cycle related	null	null	10782	-0.125893	0.265083	No
row_379	172127	Paralysed Arrest at Two-fold	null	null	10825	-0.129117	0.26498	No
row_380	190775	ELongin C	null	null	10851	-0.130637	0.265815	No
row_381	175922	Dynein light chain 1, cytoplasmic	null	null	10931	-0.137356	0.263673	No
row_382	179533	NA	null	null	10967	-0.140353	0.263957	No
row_383	173915	Probable splicing factor, arginine/serine-rich 4	null	null	10975	-0.140518	0.265783	No
row_384	171782	ABC Transporter family	null	null	11007	-0.143253	0.266287	No
row_385	266830	HoloCentric chromosome binding Protein	null	null	11074	-0.147772	0.264862	No
row_386	176808	Serine/threonine kinase NLK	null	null	11313	-0.163899	0.253957	No
row_387	259744	SERotonin/octopamine receptor family	null	null	11315	-0.164004	0.256114	No
row_388	177212	Histone H2A.V	null	null	11399	-0.169354	0.253752	No
row_389	172646	Transient receptor potential channel	null	null	11499	-0.176327	0.250508	No
row_390	177597	Protein sidekick homolog	null	null	11630	-0.186111	0.245556	No
row_391	178458	Ras-like GTP-binding protein rhoA	null	null	11760	-0.195109	0.240658	No
row_392	171722	Tyrosine protein-kinase src-1	null	null	11911	-0.205289	0.234604	No
row_393	173007	Cadherin-related hmr-1	null	null	11934	-0.206508	0.235603	No
row_394	185264	C-type LECtin	null	null	12043	-0.212688	0.231863	No
row_395	178942	Kinesin light chain	null	null	12141	-0.219587	0.22873	No
row_396	188438	Uncharacterized protein	null	null	12149	-0.220341	0.230556	No
row_397	173319	Tropomyosin isoforms a/b/d/f	null	null	12289	-0.23027	0.225108	No
row_398	178614	CalMoDulin	null	null	12328	-0.232437	0.225226	No
row_399	180603	SPeCtrin	null	null	12361	-0.234572	0.225674	No
row_400	177921	Calcium/calmodulin-dependent protein kinase type II	null	null	12388	-0.236445	0.226454	No
row_401	172505	Guanine nucleotide-binding protein G(o) subunit alpha	null	null	12431	-0.239086	0.226351	No
row_402	180393	Eukaryotic translation initiation factor 4E-2	null	null	12604	-0.251998	0.219084	No
row_403	177537	C.Elegans Chromodomain protein	null	null	12707	-0.258991	0.215675	No
row_404	191697	Kinesin-like protein klp-3	null	null	12716	-0.259956	0.217446	No
row_405	171988	hypothetical protein	null	null	12814	-0.266288	0.214313	No
row_406	181362	Protein mes-1	null	null	12863	-0.270097	0.213879	No
row_407	179068	DPP/BMP-Like	null	null	12924	-0.273071	0.212785	No
row_408	174260	Cyclin-dependent kinase inhibitor 1	null	null	12996	-0.276915	0.211084	No
row_409	173149	Glycogen synthase kinase-3	null	null	13035	-0.279362	0.211202	No
row_410	172298	Peptide transporter 3	null	null	13084	-0.282762	0.210769	No
row_411	181577	EPsiN (endocytic protein) homolog	null	null	13162	-0.286714	0.208738	No
row_412	180767	Actin-4	null	null	13255	-0.293698	0.20588	No
row_413	181727	5'-AMP-activated protein kinase catalytic subunit alpha-2	null	null	13263	-0.29419	0.207706	No
row_414	180435	hypothetical protein	null	null	13273	-0.294701	0.209422	No
row_415	174803	G Protein, Beta subunit	null	null	13388	-0.30217	0.205352	No
row_416	192062	Tetraspanin	null	null	13513	-0.310947	0.20073	No
row_417	3565725	Delta-like protein	null	null	13606	-0.316303	0.197872	No
row_418	173894	DiSHevelled related	null	null	13652	-0.319096	0.197604	No
row_419	190487	hypothetical protein	null	null	13709	-0.322781	0.19673	No
row_420	181472	Cyclin-dependent kinase 4 homolog	null	null	13801	-0.329907	0.193927	No
row_421	171666	hypothetical protein	null	null	13936	-0.338985	0.188754	No
row_422	181261	Tyrosine-protein kinase abl-1	null	null	14069	-0.349191	0.183691	No
row_423	189606	human TORsin related	null	null	14079	-0.350028	0.185408	No
row_424	176229	Dwarfin sma-2	null	null	14357	-0.369296	0.172353	No
row_425	186492	Delta-like protein	null	null	14557	-0.384055	0.163598	No
row_426	176822	FERM domain (protein4.1-ezrin-radixin-moesin) family	null	null	14602	-0.387249	0.163385	No
row_427	182980	Helix Loop Helix	null	null	15089	-0.4189	0.138812	No
row_428	185024	Growth arrest-specific protein 1 homolog	null	null	15106	-0.420128	0.140142	No
row_429	181306	hypothetical protein	null	null	15129	-0.421553	0.141142	No
row_430	172863	Feminization Of Germline	null	null	15130	-0.421571	0.143355	No
row_431	171849	Protein pop-1	null	null	15209	-0.427948	0.141268	No
row_432	176970	Delta-like protein	null	null	15241	-0.430491	0.141772	No
row_433	171787	Ectopic P granules protein 2	null	null	15542	-0.456092	0.12745	No
row_434	180009	Zinc finger protein sdc-3	null	null	15673	-0.468275	0.122497	No
row_435	13185051	hypothetical protein	null	null	15805	-0.481536	0.11749	No
row_436	181003	COHesin family	null	null	16227	-0.528027	0.0964989	No
row_437	176298	Protein CLASP-3	null	null	16476	-0.561704	0.0850429	No
row_438	183174	hypothetical protein	null	null	16690	-0.589398	0.0755159	No
row_439	181170	Tubulin beta-4 chain	null	null	16746	-0.597148	0.0746969	No
row_440	174935	LIPaSe related	null	null	16843	-0.618758	0.0716183	No
row_441	178063	Delta-like protein	null	null	17044	-0.666882	0.0628078	No
row_442	172251	Nuclear hormone receptor family member nhr-2	null	null	17120	-0.686787	0.0608866	No
row_443	180751	Mesodermal Lineage Specification	null	null	17197	-0.712968	0.0589103	No
row_444	181545	Histone H1.1	null	null	17474	-0.81367	0.045911	No
row_445	180501	Delta-like protein	null	null	17540	-0.838928	0.0445409	No
row_446	178496	SKp1 Related (ubiquitin ligase complex component)	null	null	17778	-0.967659	0.0336912	No
row_447	178493	SKp1 Related (ubiquitin ligase complex component)	null	null	17803	-0.980235	0.0345808	No
row_448	176938	Delta-like protein	null	null	17807	-0.985483	0.0366278	No
row_449	178755	Protein lag-2	null	null	17831	-0.998317	0.0375726	No
row_450	176939	Delta-like protein	null	null	17952	-1.07454	0.0331712	No
row_451	184563	Delta-like protein	null	null	18081	-1.14391	0.0283289	No
NAME	CELL_DIVISION(4)	NA	GENE SYMBOL	GENE_TITLE	RANK IN GENE LIST	RANK METRIC SCORE	RUNNING ES	CORE ENRICHMENT
row_0	190772	hypothetical protein	null	null	118	1.86611	-0.00244821	Yes
row_1	259316	hypothetical protein	null	null	411	1.25619	-0.0143813	Yes
row_2	191419	hypothetical protein	null	null	468	1.2045	-0.0134498	Yes
row_3	175067	hypothetical protein	null	null	501	1.18665	-0.0112101	Yes
row_4	172090	Kinesin Cargo Adaptor	null	null	1249	0.819954	-0.0479456	Yes
row_5	3565532	hypothetical protein	null	null	1306	0.796733	-0.0470141	Yes
row_6	172515	Piwi-like protein	null	null	1537	0.712901	-0.0555675	Yes
row_7	172532	Female germline-specific tumor suppressor gld-1	null	null	1538	0.712847	-0.0515835	Yes
row_8	172374	Meiotic spindle formation protein 2	null	null	1600	0.696098	-0.0509246	Yes
row_9	177461	P granule abnormality protein 1	null	null	1693	0.668705	-0.0519555	Yes
row_10	171838	Serine/threonine-protein kinase plk-2	null	null	1860	0.620194	-0.0570202	Yes
row_11	173158	Cytokinesis, Apoptosis, RNA-associated	null	null	1864	0.619669	-0.0531997	Yes
row_12	175991	Chondroitin proteoglycan-2	null	null	1895	0.611113	-0.0508509	Yes
row_13	180102	hypothetical protein	null	null	2056	0.574177	-0.0555886	Yes
row_14	172524	Enhancer of Glp-One (glp-1)	null	null	2062	0.571699	-0.0518771	Yes
row_15	190809	High Incidence of Males (increased X chromosome loss)	null	null	2109	0.562705	-0.0504005	Yes
row_16	175586	Chondroitin proteoglycan 1	null	null	2132	0.556955	-0.0476157	Yes
row_17	174197	PUF (Pumilio/FBF) domain-containing	null	null	2177	0.548309	-0.0460301	Yes
row_18	172399	G1/S-specific cyclin-E	null	null	2273	0.526389	-0.0472246	Yes
row_19	171912	Separin homolog sep-1	null	null	2287	0.524619	-0.0439491	Yes
row_20	173635	Beta-1,3-galactosyltransferase sqv-2	null	null	2409	0.50795	-0.0465609	Yes
row_21	172533	Glucosamine phosphate N-Acetyl transferase	null	null	2415	0.507279	-0.0428494	Yes
row_22	176092	Cytokinesis defective protein 7	null	null	2532	0.486852	-0.0451886	Yes
row_23	171895	Feminization Of Germline	null	null	2539	0.485211	-0.0415316	Yes
row_24	176511	Kinesin-like protein	null	null	2589	0.47639	-0.0402185	Yes
row_25	172830	Ribonuclease 3	null	null	2730	0.451226	-0.043866	Yes
row_26	174174	Defective in germ line development protein 3	null	null	2818	0.437264	-0.0446243	Yes
row_27	172353	M-phase inducer phosphatase cdc-25.1	null	null	2955	0.415785	-0.0480537	Yes
row_28	177647	Putative syntaxin-4	null	null	3077	0.399078	-0.0506655	Yes
row_29	173161	Profilin-1	null	null	3087	0.398269	-0.047172	Yes
row_30	191632	ADP-ribosylation factor-like protein 2	null	null	3096	0.397485	-0.043624	Yes
row_31	178007	Kinesin Light Chain	null	null	3176	0.385404	-0.0439463	Yes
row_32	178938	hypothetical protein	null	null	3308	0.368567	-0.0471032	Yes
row_33	174658	ECT2 (mammalian Rho GEF) homolog	null	null	3316	0.367811	-0.0435007	Yes
row_34	183841	URI (Unconventional prefoldin RPB5 Interactor) homolog	null	null	3335	0.365528	-0.0404978	Yes
row_35	177520	Kinetochore-associated protein rod-1	null	null	3361	0.362619	-0.0378765	Yes
row_36	190099	SQuashed Vulva	null	null	3427	0.355979	-0.0374356	Yes
row_37	171656	hypothetical protein	null	null	3439	0.354855	-0.0340512	Yes
row_38	183250	yeast PRP (splicing factor) related	null	null	3464	0.351493	-0.0313754	Yes
row_39	178759	Anterior Pharynx in eXcess	null	null	3741	0.324395	-0.0424363	Yes
row_40	176361	Tubulin gamma chain	null	null	3776	0.320576	-0.0403056	Yes
row_41	172562	Non-muscle MYosin	null	null	3787	0.319906	-0.0368666	Yes
row_42	172342	hypothetical protein	null	null	3795	0.319348	-0.0332642	Yes
row_43	173604	hypothetical protein	null	null	3864	0.313067	-0.0329868	Yes
row_44	175096	Histone-lysine N-methyltransferase mes-2	null	null	3925	0.307126	-0.0322734	Yes
row_45	176286	Protein glp-1	null	null	3966	0.304158	-0.0304698	Yes
row_46	172612	Meiotic spindle formation protein mei-1	null	null	4030	0.298024	-0.0299199	Yes
row_47	171950	PaTched Related family	null	null	4031	0.29802	-0.0259358	Yes
row_48	172586	Cell Division Cycle related	null	null	4083	0.294169	-0.0247318	Yes
row_49	180185	Serine/threonine-protein kinase par-4	null	null	4107	0.292193	-0.0220015	Yes
row_50	171683	hypothetical protein	null	null	4145	0.288164	-0.0200343	Yes
row_51	179652	DNA polymerase delta catalytic subunit	null	null	4250	0.280649	-0.0217194	Yes
row_52	179227	DNaJ domain (prokaryotic heat shock protein)	null	null	4322	0.276198	-0.0216056	Yes
row_53	171657	hypothetical protein	null	null	4330	0.275414	-0.0180031	Yes
row_54	175818	DEAD boX helicase homolog	null	null	4336	0.274782	-0.0142916	Yes
row_55	179443	Pre-mRNA-splicing factor SLU7	null	null	4447	0.267268	-0.0163037	Yes
row_56	176816	E3 ubiquitin-protein ligase parkin	null	null	4621	0.253709	-0.02175	Yes
row_57	179592	Spindle assembly abnormal protein 5	null	null	4729	0.244329	-0.0235986	Yes
row_58	172662	hypothetical protein	null	null	4734	0.244141	-0.0198326	Yes
row_59	172782	Ubiquitin carboxyl-terminal hydrolase	null	null	4839	0.237063	-0.0215176	Yes
row_60	173956	Probable serine/threonine-protein kinase zyg-1	null	null	5014	0.224379	-0.0270184	Yes
row_61	174350	Zygote defective protein 9	null	null	5062	0.221774	-0.0255964	Yes
row_62	172041	Dynein Heavy Chain	null	null	5109	0.218588	-0.0241198	Yes
row_63	172902	Ribosomal RNA-processing protein 7 homolog	null	null	5212	0.211728	-0.0256958	Yes
row_64	175275	hypothetical protein	null	null	5217	0.211649	-0.0219298	Yes
row_65	183040	hypothetical protein	null	null	5241	0.210269	-0.0191995	Yes
row_66	176507	RING finger protein 113 homolog	null	null	5253	0.209016	-0.0158151	Yes
row_67	186851	hypothetical protein	null	null	5355	0.202596	-0.0173366	Yes
row_68	174698	Anaphase-promoting complex subunit 1	null	null	5374	0.201507	-0.0143337	Yes
row_69	176143	Serine/threonine-protein kinase plk-1	null	null	5413	0.199141	-0.0124211	Yes
row_70	173072	NEDD8-conjugating enzyme ubc-12	null	null	5464	0.195638	-0.0111625	Yes
row_71	172146	yeast PRP (splicing factor) related	null	null	5476	0.194943	-0.00777809	Yes
row_72	174674	Peptidyl-prolyl cis-trans isomerase 4	null	null	5540	0.191881	-0.0072282	Yes
row_73	171752	Emerin homolog 1	null	null	5555	0.191143	-0.00400729	Yes
row_74	175853	CYtoKinesis defect	null	null	5574	0.190326	-0.00100442	Yes
row_75	175066	Cactin	null	null	5603	0.18859	0.00145334	Yes
row_76	176358	DNA PRImase homolog	null	null	5630	0.186935	0.00402013	Yes
row_77	173122	DNA PRImase homolog	null	null	5684	0.183993	0.00511512	Yes
row_78	176010	hypothetical protein	null	null	5704	0.182363	0.00806348	Yes
row_79	176661	proteasome Regulatory Particle, ATPase-like	null	null	5725	0.181516	0.0109573	Yes
row_80	176927	COP9 signalosome complex subunit 4	null	null	5726	0.18147	0.0149414	Yes
row_81	174535	NanOS related	null	null	5782	0.179204	0.0159274	Yes
row_82	177899	Uncharacterized protein	null	null	5937	0.170892	0.0115168	Yes
row_83	175634	Protein mel-28	null	null	5962	0.169886	0.0141926	Yes
row_84	174430	Suppressor of ZYg-1	null	null	5983	0.168556	0.0170864	Yes
row_85	4363023	Splicing factor 3B subunit 4	null	null	6002	0.167439	0.0200893	Yes
row_86	172338	Poly(A) RNA polymerase gld-2	null	null	6017	0.166158	0.0233102	Yes
row_87	171888	Vasa-and Belle-like Helicase	null	null	6032	0.165436	0.0265311	Yes
row_88	176526	STE20-related kinase adapter protein strd-1	null	null	6067	0.16364	0.0286618	Yes
row_89	174600	STIP (Septin and Tuftelin Interacting Protein) homolog	null	null	6077	0.163269	0.0321553	Yes
row_90	177895	Guanine nucleotide-binding protein subunit beta-2-like 1	null	null	6124	0.160202	0.0336319	Yes
row_91	176877	Maternal embryonic leucine zipper kinase	null	null	6136	0.159382	0.0370163	Yes
row_92	175117	Masculinisation Of Germline	null	null	6201	0.155637	0.0375117	Yes
row_93	175133	Transforming acid coiled-coil-containing protein 1	null	null	6226	0.153906	0.0401875	Yes
row_94	176183	Histone-lysine N-methyltransferase met-2	null	null	6344	0.147905	0.0377938	Yes
row_95	173914	Protein kinase C-like 3	null	null	6394	0.145711	0.0391068	Yes
row_96	173920	Probable pre-mRNA-splicing factor ATP-dependent RNA helicase mog-5	null	null	6396	0.145649	0.0430364	Yes
row_97	185482	Mps One Binder (Mats/MOB1) homolog	null	null	6478	0.141467	0.0426051	Yes
row_98	172999	yeast PRP (splicing factor) related	null	null	6493	0.140678	0.045826	Yes
row_99	172268	Aurora/IPL1-related protein kinase 2	null	null	6518	0.13975	0.0485018	Yes
row_100	180168	COP9 signalosome complex subunit 1	null	null	6542	0.138371	0.0512321	Yes
row_101	179749	Cohesin subunit scc-3	null	null	6552	0.137835	0.0547256	Yes
row_102	189237	DAF-16/FOXO Controlled, germline Tumor affecting	null	null	6553	0.13777	0.0587096	Yes
row_103	176280	CLASP family of microtubule-binding proteins	null	null	6574	0.136348	0.0616035	Yes
row_104	176834	COP9 signalosome complex subunit 3	null	null	6612	0.134603	0.0635707	Yes
row_105	178289	COP-9 SigNalosome subunit	null	null	6626	0.133898	0.0668461	Yes
row_106	179358	RING-box protein 1	null	null	6638	0.133262	0.0702305	Yes
row_107	176815	CYtoKinesis defect	null	null	6641	0.13312	0.0741056	Yes
row_108	179534	Actin-2	null	null	6655	0.132427	0.077381	Yes
row_109	176374	Cyclin-dependent kinase 1	null	null	6671	0.13154	0.0805474	Yes
row_110	177840	Uncharacterized protein	null	null	6726	0.128618	0.0815879	Yes
row_111	177988	LSM Sm-like protein	null	null	6740	0.128067	0.0848633	Yes
row_112	173167	Tubulin alpha-2 chain	null	null	6742	0.127961	0.0887928	Yes
row_113	185802	CTD nuclear envelope phosphatase 1 homolog	null	null	6892	0.118266	0.0846548	Yes
row_114	173795	Intracelllar PhosphoLipase A family	null	null	6895	0.118042	0.0885298	Yes
row_115	174317	Segment polarity protein dishevelled homolog mig-5	null	null	6927	0.116507	0.0908241	Yes
row_116	172826	Serine/threonine-protein phosphatase 2A regulatory subunit sur-6	null	null	7015	0.111844	0.0900657	Yes
row_117	176409	Probable pre-mRNA-splicing factor ATP-dependent RNA helicase mog-1	null	null	7023	0.111555	0.0936682	Yes
row_118	177824	mRNA transport homolog 4	null	null	7072	0.109085	0.0950357	Yes
row_119	266859	WD repeat-containing protein fzy-1	null	null	7153	0.104943	0.0946589	Yes
row_120	177342	COP9 signalosome complex subunit 5	null	null	7159	0.104613	0.0983705	Yes
row_121	174150	TransCription Elongation Regulator homolog	null	null	7195	0.102584	0.100447	Yes
row_122	174689	Pre-mRNA-splicing factor CWC22 homolog	null	null	7246	0.100068	0.101705	Yes
row_123	177181	RNP (RRM RNA binding domain) containing	null	null	7268	0.0988782	0.104545	Yes
row_124	172145	Cell division cycle protein 27 homolog	null	null	7285	0.0977598	0.107656	Yes
row_125	175783	Partitioning defective protein 3	null	null	7331	0.0954433	0.109187	Yes
row_126	177456	Dolichyl-diphosphooligosaccharide--protein glycosyltransferase subunit 1	null	null	7371	0.0932223	0.111046	Yes
row_127	173225	CYclophyliN	null	null	7381	0.0925121	0.114539	Yes
row_128	178113	14-3-3-like protein 1	null	null	7434	0.0888396	0.115689	Yes
row_129	172856	Protein mom-5	null	null	7467	0.0872625	0.117928	Yes
row_130	175006	Chromosome segregation and cytokinesis defective protein 1	null	null	7598	0.0792838	0.114826	Yes
row_131	174233	Cell division control protein 42 homolog	null	null	7600	0.0789491	0.118756	Yes
row_132	175018	Mitotic checkpoint protein bub-3	null	null	7608	0.0783075	0.122358	Yes
row_133	172406	Tumorous Enhancer of Glp-1(gf)	null	null	7690	0.0736172	0.121927	Yes
row_134	182257	Thioredoxin domain-containing protein 9	null	null	7792	0.0685639	0.120405	Yes
row_135	179853	LiPIN (mammalian lipodystrophy associated) homolog	null	null	7801	0.0681039	0.123953	Yes
row_136	172842	Mitogen-activated protein kinase kinase kinase mom-4	null	null	7811	0.0675892	0.127447	Yes
row_137	171788	InCenP homolog	null	null	7813	0.0675581	0.131376	Yes
row_138	266854	DiSHevelled related	null	null	7825	0.0670366	0.134761	Yes
row_139	176806	Cullin-2	null	null	8026	0.0567376	0.127843	Yes
row_140	176009	Ectopic P granules protein 4	null	null	8085	0.053224	0.128665	Yes
row_141	171922	RNP (RRM RNA binding domain) containing	null	null	8220	0.0456133	0.125345	Yes
row_142	176672	Anillin-like protein 1	null	null	8238	0.0447692	0.128402	Yes
row_143	177046	MAD (yeast Mitosis arrest DeFicient) related	null	null	8240	0.0447133	0.132332	Yes
row_144	174527	MO25-like protein 2	null	null	8312	0.0406919	0.132445	Yes
row_145	174901	Putative U5 small nuclear ribonucleoprotein 200 kDa helicase	null	null	8352	0.0382083	0.134303	Yes
row_146	191608	ADP-Ribosylation Factor related	null	null	8356	0.0379703	0.138124	Yes
row_147	172278	COP9 signalosome complex subunit 2	null	null	8377	0.0368639	0.141018	Yes
row_148	173440	yeast PRP (splicing factor) related	null	null	8417	0.0345575	0.142876	Yes
row_149	180904	Protein-serine O-palmitoleoyltransferase porcupine	null	null	8429	0.0341804	0.14626	Yes
row_150	177979	RNA Binding Motif protein homolog	null	null	8575	0.025345	0.14234	Yes
row_151	177836	Nuclear Pore complex Protein	null	null	8631	0.0215449	0.143326	Yes
row_152	174364	hypothetical protein	null	null	8656	0.0203271	0.146002	Yes
row_153	176328	SR Protein Kinase	null	null	8681	0.0184091	0.148678	Yes
row_154	175549	Splicing Factor ThreeB (3b) Subunit homolog	null	null	8693	0.0178004	0.152062	Yes
row_155	184953	Nuclear cap-binding protein subunit 2	null	null	8777	0.012617	0.151522	Yes
row_156	176439	DNA polymerase alpha subunit B	null	null	8825	0.00946568	0.152944	Yes
row_157	172591	APC Related	null	null	8854	0.00715237	0.155402	Yes
row_158	179833	hypothetical protein	null	null	8960	0.00147469	0.153662	Yes
row_159	175281	SMN (Survival of Motor Neuron protein) Related	null	null	8965	0.00103689	0.157428	Yes
row_160	180047	LSM Sm-like protein	null	null	9024	-0.00316223	0.158251	Yes
row_161	176796	Myosin-2 essential light chain	null	null	9064	-0.00526015	0.160109	Yes
row_162	176003	Pre-mRNA-splicing factor syf-2	null	null	9114	-0.00925479	0.161422	Yes
row_163	175983	CYtoKinesis defect	null	null	9121	-0.00971799	0.165079	Yes
row_164	176509	Condensin complex subunit 1	null	null	9229	-0.0169044	0.16323	Yes
row_165	177710	Cleavage Factor IM (CFIm) homolog	null	null	9236	-0.0175074	0.166887	Yes
row_166	175244	RNP (RRM RNA binding domain) containing	null	null	9274	-0.0205262	0.168855	Yes
row_167	176164	Kinetochore null protein 1	null	null	9296	-0.0223176	0.171694	Yes
[truncated: 8,802 more rows]

## Sheet: SiO2vsControl
Supplementary data 2. Gene ontology enrichment by GSEA
Positive NES	NAME	GS<br> follow link to MSigDB		GS DETAILS	SIZE	ES	NES	NOM p-val	FDR q-val	FWER p-val	RANK AT MAX	LEADING EDGE	Oberved by GOATOOLS
1	CELL_CYCLE_PROCESS(4)	CELL_CYCLE_PROCESS(4)	GO:0022402	Details ...	452	0.172231	4.16704	0	0	0	14180	tags=93%, list=76%, signal=380%	NA
2	CELL_CYCLE(4)	CELL_CYCLE(4)	GO:0007049	Details ...	498	0.160818	4.09513	0	0	0	14180	tags=92%, list=76%, signal=374%	NA
3	GAMETE_GENERATION(4)	GAMETE_GENERATION(4)	GO:0007276	Details ...	415	0.169616	4.0116	0	0	0	13116	tags=87%, list=70%, signal=287%	NA
4	GERM_CELL_DEVELOPMENT(4)&CELLULAR_PROCESS_INVOLVED_IN_REPRODUCTION_IN_MULTICELLULAR_ORGANISM(4)	GERM_CELL_DEVELOPMENT(4)&CELLULAR_PROCESS_INVOLVED_IN_REPRODUCTION_IN_MULTICELLULAR_ORGANISM(4)	GO:0007281	Details ...	317	0.190281	3.89678	0	0	0	12089	tags=84%, list=65%, signal=234%	NA
5	APOPTOTIC_PROCESS(6)	APOPTOTIC_PROCESS(6)	GO:0006915	Details ...	436	0.161263	3.88728	0	0	0	12961	tags=85%, list=70%, signal=274%	NA
6	SEXUAL_REPRODUCTION(3)	SEXUAL_REPRODUCTION(3)	GO:0019953	Details ...	497	0.153958	3.85353	0	0	0	14751	tags=94%, list=79%, signal=440%	NA
7	DEATH(3)&CELL_DEATH(4)	DEATH(3)&CELL_DEATH(4)	GO:0016265	Details ...	498	0.146522	3.69894	0	0	0	13055	tags=84%, list=70%, signal=274%	NA
8	PROGRAMMED_CELL_DEATH(5)	PROGRAMMED_CELL_DEATH(5)	GO:0012501	Details ...	456	0.146542	3.69515	0	0	0	12984	tags=84%, list=70%, signal=270%	NA
9	ORGANELLE_FISSION(4)	ORGANELLE_FISSION(4)	GO:0048285	Details ...	343	0.161075	3.43272	0	0	0	14272	tags=92%, list=77%, signal=388%	NA
10	MEIOTIC_CELL_CYCLE(3)	MEIOTIC_CELL_CYCLE(3)	GO:0051321	Details ...	311	0.164423	3.41297	0	0	0	14180	tags=92%, list=76%, signal=380%	NA
11	NUCLEAR_DIVISION(5)	NUCLEAR_DIVISION(5)	GO:0000280	Details ...	341	0.160604	3.36388	0	0	0	14272	tags=92%, list=77%, signal=388%	NA
12	MEIOTIC_NUCLEAR_DIVISION(4)	MEIOTIC_NUCLEAR_DIVISION(4)	GO:0007126	Details ...	279	0.163349	3.15776	0	0	0	13896	tags=91%, list=75%, signal=351%	NA
13	OOGENESIS(5)	OOGENESIS(5)	GO:0048477	Details ...	205	0.180029	3.00985	0	0	0	12041	tags=82%, list=65%, signal=231%	NA
14	CELL_DIVISION(4)	CELL_DIVISION(4)	GO:0051301	Details ...	251	0.156997	2.88574	0	6.34e-05	0.002	12998	tags=85%, list=70%, signal=278%	NA
15	SPERMATID_DIFFERENTIATION(4)&SPERMATID_DEVELOPMENT(5)	SPERMATID_DIFFERENTIATION(4)&SPERMATID_DEVELOPMENT(5)	GO:0048515	Details ...	13	0.637063	2.81816	0	0.000117	0.004	5336	tags=92%, list=29%, signal=129%	NA
16	POSITIVE_REGULATION_OF_MULTICELLULAR_ORGANISMAL_PROCESS(3)	POSITIVE_REGULATION_OF_MULTICELLULAR_ORGANISMAL_PROCESS(3)	GO:0051240	Details ...	386	0.123577	2.81375	0	0.000109	0.004	15410	tags=95%, list=83%, signal=537%	NA
17	FEMALE_GAMETE_GENERATION(5)	FEMALE_GAMETE_GENERATION(5)	GO:0007292	Details ...	229	0.164666	2.81315	0	0.000103	0.004	12915	tags=86%, list=69%, signal=276%	NA
18	REGULATION_OF_GROWTH(3)	REGULATION_OF_GROWTH(3)	GO:0040008	Details ...	380	0.122701	2.78657	0	0.000121	0.005	15410	tags=95%, list=83%, signal=537%	NA
19	MITOTIC_CELL_CYCLE(5)	MITOTIC_CELL_CYCLE(5)	GO:0000278	Details ...	232	0.158296	2.77618	0	0.000138	0.006	14272	tags=92%, list=77%, signal=389%	NA
20	DEVELOPMENTAL_GROWTH(3)	DEVELOPMENTAL_GROWTH(3)	GO:0048589	Details ...	378	0.125104	2.77141	0	0.000131	0.006	15410	tags=95%, list=83%, signal=538%	NA
21	MEIOTIC_CELL_CYCLE_PROCESS(4)	MEIOTIC_CELL_CYCLE_PROCESS(4)	GO:1903046	Details ...	155	0.192379	2.76036	0	0.000125	0.006	14114	tags=95%, list=76%, signal=388%	NA
22	MULTICELLULAR_ORGANISM_GROWTH(3)	MULTICELLULAR_ORGANISM_GROWTH(3)	GO:0035264	Details ...	356	0.127514	2.75668	0	0.000157	0.008	15410	tags=95%, list=83%, signal=540%	NA
23	REGULATION_OF_CELL_CYCLE(4)	REGULATION_OF_CELL_CYCLE(4)	GO:0051726	Details ...	185	0.169622	2.74715	0	0.000188	0.01	13487	tags=89%, list=72%, signal=320%	NA
24	REGULATION_OF_DEVELOPMENTAL_GROWTH(4)	REGULATION_OF_DEVELOPMENTAL_GROWTH(4)	GO:0048638	Details ...	360	0.12525	2.7251	0	0.000197	0.011	15410	tags=95%, list=83%, signal=539%	NA
25	POSITIVE_REGULATION_OF_DEVELOPMENTAL_PROCESS(3)	POSITIVE_REGULATION_OF_DEVELOPMENTAL_PROCESS(3)	GO:0051094	Details ...	379	0.122596	2.70718	0	0.000242	0.014	15655	tags=96%, list=84%, signal=589%	NA
26	TRANSLATION(6)	TRANSLATION(6)	GO:0006412	Details ...	49	0.312709	2.61983	0	0.000401	0.023	9017	tags=80%, list=48%, signal=154%	NA
27	POSITIVE_REGULATION_OF_DEVELOPMENTAL_GROWTH(4)	POSITIVE_REGULATION_OF_DEVELOPMENTAL_GROWTH(4)	GO:0048639	Details ...	326	0.125954	2.60769	0	0.000401	0.024	15410	tags=95%, list=83%, signal=540%	NA
28	CHROMOSOME_SEGREGATION(4)	CHROMOSOME_SEGREGATION(4)	GO:0007059	Details ...	171	0.170345	2.60745	0	0.000387	0.024	14178	tags=93%, list=76%, signal=385%	NA
29	POSITIVE_REGULATION_OF_MULTICELLULAR_ORGANISM_GROWTH(4)	POSITIVE_REGULATION_OF_MULTICELLULAR_ORGANISM_GROWTH(4)	GO:0040018	Details ...	324	0.125632	2.59655	0	0.000389	0.025	15410	tags=95%, list=83%, signal=540%	NA
30	GENE_SILENCING(4)	GENE_SILENCING(4)	GO:0016458	Details ...	131	0.191797	2.57918	0	0.000391	0.026	12664	tags=87%, list=68%, signal=270%	NA
31	POSITIVE_REGULATION_OF_GROWTH(3)	POSITIVE_REGULATION_OF_GROWTH(3)	GO:0045927	Details ...	341	0.122282	2.57906	0	0.000378	0.026	15410	tags=95%, list=83%, signal=538%	NA
32	MALE_GAMETE_GENERATION(5)&SPERMATOGENESIS(6)	MALE_GAMETE_GENERATION(5)&SPERMATOGENESIS(6)	GO:0048232	Details ...	40	0.340489	2.57097	0	0.000366	0.026	8108	tags=78%, list=44%, signal=137%	NA
33	MICROTUBULE_CYTOSKELETON_ORGANIZATION(5)	MICROTUBULE_CYTOSKELETON_ORGANIZATION(5)	GO:0000226	Details ...	145	0.185118	2.56295	0	0.000355	0.026	14180	tags=94%, list=76%, signal=392%	NA
34	REGULATION_OF_MULTICELLULAR_ORGANISM_GROWTH(4)	REGULATION_OF_MULTICELLULAR_ORGANISM_GROWTH(4)	GO:0040014	Details ...	344	0.125733	2.5608	0	0.000357	0.027	15410	tags=95%, list=83%, signal=540%	NA
35	MEIOTIC_CHROMOSOME_SEGREGATION(5)	MEIOTIC_CHROMOSOME_SEGREGATION(5)	GO:0045132	Details ...	129	0.191804	2.55573	0	0.000372	0.029	12626	tags=87%, list=68%, signal=268%	NA
36	POSTTRANSCRIPTIONAL_GENE_SILENCING(5)&GENE_SILENCING_BY_RNA(5)&POSTTRANSCRIPTIONAL_GENE_SILENCING_BY_RNA(6)	POSTTRANSCRIPTIONAL_GENE_SILENCING(5)&GENE_SILENCING_BY_RNA(5)&POSTTRANSCRIPTIONAL_GENE_SILENCING_BY_RNA(6)	GO:0016441	Details ...	130	0.190798	2.5112	0	0.00054	0.044	12807	tags=88%, list=69%, signal=279%	NA
37	NCRNA_METABOLIC_PROCESS(6)	NCRNA_METABOLIC_PROCESS(6)	GO:0034660	Details ...	26	0.395208	2.42275	0	0.00130347	0.107	9844	tags=92%, list=53%, signal=195%	NA
38	RNA_INTERFERENCE(7)	RNA_INTERFERENCE(7)	GO:0016246	Details ...	123	0.183675	2.35433	0	0.00225198	0.179	12807	tags=87%, list=69%, signal=276%	NA
39	POSTTRANSCRIPTIONAL_REGULATION_OF_GENE_EXPRESSION(6)	POSTTRANSCRIPTIONAL_REGULATION_OF_GENE_EXPRESSION(6)	GO:0010608	Details ...	159	0.164389	2.33239	0	0.00257436	0.207	12664	tags=84%, list=68%, signal=261%	NA
40	NUCLEIC_ACID_PHOSPHODIESTER_BOND_HYDROLYSIS(6)	NUCLEIC_ACID_PHOSPHODIESTER_BOND_HYDROLYSIS(6)	GO:0090305	Details ...	33	0.34373	2.3264	0	0.0025862	0.211	9979	tags=88%, list=54%, signal=189%	NA
41	DNA_RECOMBINATION(6)	DNA_RECOMBINATION(6)	GO:0006310	Details ...	20	0.42743	2.32497	0.002	0.00254397	0.212	8812	tags=90%, list=47%, signal=171%	NA
42	REGULATION_OF_CELL_CYCLE_PROCESS(5)	REGULATION_OF_CELL_CYCLE_PROCESS(5)	GO:0010564	Details ...	136	0.168861	2.31522	0	0.0026685	0.227	13863	tags=91%, list=74%, signal=354%	NA
43	MOLTING_CYCLE(4)&MOLTING_CYCLE_COLLAGEN_AND_CUTICULIN_BASED_CUTICLE(5)	MOLTING_CYCLE(4)&MOLTING_CYCLE_COLLAGEN_AND_CUTICULIN_BASED_CUTICLE(5)	GO:0042303	Details ...	262	0.126942	2.28914	0	0.00323536	0.277	12316	tags=79%, list=66%, signal=229%	NA
44	CYTOKINESIS(5)	CYTOKINESIS(5)	GO:0000910	Details ...	74	0.227528	2.28284	0	0.00329067	0.286	14156	tags=99%, list=76%, signal=409%	NA
45	SPINDLE_ORGANIZATION(5)	SPINDLE_ORGANIZATION(5)	GO:0007051	Details ...	89	0.206126	2.27482	0	0.00337181	0.299	14180	tags=97%, list=76%, signal=403%	NA
46	SYNAPSIS(6)&HOMOLOGOUS_CHROMOSOME_SEGREGATION(6)	SYNAPSIS(6)&HOMOLOGOUS_CHROMOSOME_SEGREGATION(6)	GO:0007129	Details ...	12	0.539203	2.25869	0	0.00375262	0.331	7038	tags=92%, list=38%, signal=147%	NA
47	NUCLEUS_ORGANIZATION(4)	NUCLEUS_ORGANIZATION(4)	GO:0006997	Details ...	37	0.314506	2.24776	0.00408998	0.00400082	0.353	11775	tags=95%, list=63%, signal=257%	NA
48	MASCULINIZATION_OF_HERMAPHRODITIC_GERM_LINE(7)	MASCULINIZATION_OF_HERMAPHRODITIC_GERM_LINE(7)	GO:0042006	Details ...	15	0.470724	2.14897	0.00192678	0.00785774	0.574	9867	tags=100%, list=53%, signal=212%	NA
49	NCRNA_PROCESSING(7)	NCRNA_PROCESSING(7)	GO:0034470	Details ...	22	0.381121	2.12387	0.00403226	0.00910179	0.633	9844	tags=91%, list=53%, signal=193%	NA
50	FERTILIZATION(4)	FERTILIZATION(4)	GO:0009566	Details ...	61	0.230541	2.11549	0	0.00943283	0.646	13738	tags=97%, list=74%, signal=367%	NA
51	REGULATION_OF_MEIOTIC_CELL_CYCLE(4)	REGULATION_OF_MEIOTIC_CELL_CYCLE(4)	GO:0051445	Details ...	127	0.159019	2.1109	0	0.00959039	0.66	13487	tags=88%, list=72%, signal=317%	NA
52	SINGLE_FERTILIZATION(5)	SINGLE_FERTILIZATION(5)	GO:0007338	Details ...	60	0.22998	2.09923	0.00400802	0.0100946	0.687	13738	tags=97%, list=74%, signal=367%	NA
53	HERMAPHRODITE_GERM_LINE_SEX_DETERMINATION(6)	HERMAPHRODITE_GERM_LINE_SEX_DETERMINATION(6)	GO:0040021	Details ...	46	0.256707	2.07531	0.00208768	0.0114874	0.745	11834	tags=89%, list=64%, signal=244%	NA
54	DNA_METABOLIC_PROCESS(5)	DNA_METABOLIC_PROCESS(5)	GO:0006259	Details ...	77	0.19758	2.07008	0.00616016	0.0117118	0.762	9399	tags=70%, list=50%, signal=141%	NA
55	MITOTIC_SPINDLE_ORGANIZATION(6)	MITOTIC_SPINDLE_ORGANIZATION(6)	GO:0007052	Details ...	78	0.20123	2.06711	0.00194553	0.0117761	0.766	14180	tags=96%, list=76%, signal=401%	NA
56	MEIOSIS_I(5)	MEIOSIS_I(5)	GO:0007127	Details ...	21	0.367611	2.0301	0.00394477	0.0146235	0.833	8240	tags=81%, list=44%, signal=145%	NA
57	OOCYTE_DIFFERENTIATION(4)	OOCYTE_DIFFERENTIATION(4)	GO:0009994	Details ...	42	0.254258	1.95637	0.00194932	0.0223041	0.945	13460	tags=98%, list=72%, signal=351%	NA
58	RNA_PHOSPHODIESTER_BOND_HYDROLYSIS_ENDONUCLEOLYTIC(7)	RNA_PHOSPHODIESTER_BOND_HYDROLYSIS_ENDONUCLEOLYTIC(7)	GO:0090502	Details ...	11	0.473792	1.92799	0.00575816	0.0257789	0.964	9808	tags=100%, list=53%, signal=211%	NA
59	CELLULAR_RESPONSE_TO_DNA_DAMAGE_STIMULUS(5)	CELLULAR_RESPONSE_TO_DNA_DAMAGE_STIMULUS(5)	GO:0006974	Details ...	39	0.259749	1.92328	0.00575816	0.0260512	0.965	9979	tags=79%, list=54%, signal=171%	NA
60	RNA_PHOSPHODIESTER_BOND_HYDROLYSIS(6)	RNA_PHOSPHODIESTER_BOND_HYDROLYSIS(6)	GO:0090501	Details ...	15	0.405239	1.91322	0.01222	0.0271055	0.97	9844	tags=93%, list=53%, signal=198%	NA
61	GERM_LINE_SEX_DETERMINATION(5)	GERM_LINE_SEX_DETERMINATION(5)	GO:0018992	Details ...	50	0.227975	1.87462	0.0130841	0.0333741	0.987	14394	tags=100%, list=77%, signal=439%	NA
62	OOCYTE_DEVELOPMENT(5)	OOCYTE_DEVELOPMENT(5)	GO:0048599	Details ...	41	0.255169	1.86731	0.00591716	0.0342481	0.992	13432	tags=98%, list=72%, signal=349%	NA
63	PRONUCLEAR_MIGRATION(6)	PRONUCLEAR_MIGRATION(6)	GO:0035046	Details ...	50	0.223172	1.85918	0.00823045	0.0352011	0.995	13738	tags=96%, list=74%, signal=365%	NA
64	CELLULAR_RESPONSE_TO_STRESS(4)	CELLULAR_RESPONSE_TO_STRESS(4)	GO:0033554	Details ...	143	0.135748	1.85686	0.00992064	0.0351171	0.995	15078	tags=94%, list=81%, signal=491%	NA
65	MAINTENANCE_OF_LOCATION(3)	MAINTENANCE_OF_LOCATION(3)	GO:0051235	Details ...	457	0.0753722	1.8562	0.01222	0.0347046	0.995	15711	tags=92%, list=84%, signal=571%	NA
66	REGULATION_OF_NUCLEAR_DIVISION(5)	REGULATION_OF_NUCLEAR_DIVISION(5)	GO:0051783	Details ...	107	0.15609	1.85339	0.0197628	0.0347361	0.995	13475	tags=88%, list=72%, signal=316%	NA
67	DNA_REPAIR(4)	DNA_REPAIR(4)	GO:0006281	Details ...	24	0.307064	1.83535	0.00421941	0.037798	0.995	9035	tags=79%, list=48%, signal=154%	NA
68	RIBONUCLEOSIDE_METABOLIC_PROCESS(6)	RIBONUCLEOSIDE_METABOLIC_PROCESS(6)	GO:0009119	Details ...	27	0.294552	1.83075	0.0194175	0.0380128	0.996	10390	tags=85%, list=56%, signal=192%	NA
69	LIPID_LOCALIZATION(4)	LIPID_LOCALIZATION(4)	GO:0010876	Details ...	449	0.0738209	1.79856	0.0130152	0.0447465	0.998	15711	tags=92%, list=84%, signal=570%	NA
70	RECIPROCAL_MEIOTIC_RECOMBINATION(4)&RECIPROCAL_DNA_RECOMBINATION(7)	RECIPROCAL_MEIOTIC_RECOMBINATION(4)&RECIPROCAL_DNA_RECOMBINATION(7)	GO:0007131	Details ...	12	0.420529	1.79287	0.01875	0.0454825	0.998	7695	tags=83%, list=41%, signal=142%	NA
71	RNA_MODIFICATION(6)	RNA_MODIFICATION(6)	GO:0009451	Details ...	13	0.411198	1.78645	0.0175097	0.0463865	0.999	8108	tags=85%, list=44%, signal=150%	NA
72	REGULATION_OF_PHOSPHORUS_METABOLIC_PROCESS(5)&REGULATION_OF_PHOSPHATE_METABOLIC_PROCESS(6)	REGULATION_OF_PHOSPHORUS_METABOLIC_PROCESS(5)&REGULATION_OF_PHOSPHATE_METABOLIC_PROCESS(6)	GO:0051174	Details ...	54	0.204393	1.78529	0.0142857	0.0460527	0.999	14833	tags=100%, list=80%, signal=489%	NA
73	REGULATION_OF_PHOSPHORYLATION(7)	REGULATION_OF_PHOSPHORYLATION(7)	GO:0042325	Details ...	52	0.204371	1.76859	0.0212355	0.0498991	1	14833	tags=100%, list=80%, signal=489%	NA
74	LIPID_STORAGE(4)	LIPID_STORAGE(4)	GO:0019915	Details ...	442	0.0724196	1.75886	0.0239044	0.0517251	1	15711	tags=91%, list=84%, signal=569%	NA
75	REGULATION_OF_MEIOSIS(5)	REGULATION_OF_MEIOSIS(5)	GO:0040020	Details ...	88	0.159937	1.75653	0.0181818	0.0516919	1	14394	tags=93%, list=77%, signal=408%	NA
76	MICROTUBULE_POLYMERIZATION_OR_DEPOLYMERIZATION(6)	MICROTUBULE_POLYMERIZATION_OR_DEPOLYMERIZATION(6)	GO:0031109	Details ...	18	0.346475	1.72094	0.0233918	0.0611202	1	11146	tags=94%, list=60%, signal=235%	NA
77	FEMINIZATION_OF_HERMAPHRODITIC_GERM_LINE(7)	FEMINIZATION_OF_HERMAPHRODITIC_GERM_LINE(7)	GO:0040022	Details ...	32	0.250701	1.70637	0.0263692	0.0651315	1	13385	tags=97%, list=72%, signal=343%	NA
78	REGULATION_OF_CELL_PROLIFERATION(4)	REGULATION_OF_CELL_PROLIFERATION(4)	GO:0042127	Details ...	99	0.140854	1.68053	0.0295359	0.0731165	1	13385	tags=86%, list=72%, signal=303%	NA
79	REGULATION_OF_MITOTIC_CELL_CYCLE(5)	REGULATION_OF_MITOTIC_CELL_CYCLE(5)	GO:0007346	Details ...	73	0.166069	1.67528	0.0403846	0.0741336	1	14272	tags=93%, list=77%, signal=397%	NA
80	DNA_REPLICATION(6)	DNA_REPLICATION(6)	GO:0006260	Details ...	17	0.33884	1.65713	0.0352251	0.0799633	1	9035	tags=82%, list=48%, signal=160%	NA
81	ESTABLISHMENT_OF_NUCLEUS_LOCALIZATION(5)&NUCLEUS_LOCALIZATION(5)	ESTABLISHMENT_OF_NUCLEUS_LOCALIZATION(5)&NUCLEUS_LOCALIZATION(5)	GO:0040023	Details ...	54	0.192387	1.65619	0.0308285	0.0793442	1	14711	tags=98%, list=79%, signal=465%	NA
82	SYNAPTONEMAL_COMPLEX_ORGANIZATION(5)	SYNAPTONEMAL_COMPLEX_ORGANIZATION(5)	GO:0070193	Details ...	10	0.430143	1.64904	0.0324544	0.0811723	1	5031	tags=70%, list=27%, signal=96%	NA
83	GLYCOSYL_COMPOUND_METABOLIC_PROCESS(4)	GLYCOSYL_COMPOUND_METABOLIC_PROCESS(4)	GO:1901657	Details ...	31	0.245538	1.61663	0.0407767	0.0939593	1	12861	tags=94%, list=69%, signal=302%	NA
84	NUCLEOSIDE_PHOSPHATE_METABOLIC_PROCESS(5)&NUCLEOTIDE_METABOLIC_PROCESS(6)	NUCLEOSIDE_PHOSPHATE_METABOLIC_PROCESS(5)&NUCLEOTIDE_METABOLIC_PROCESS(6)	GO:0006753	Details ...	45	0.204669	1.58867	0.0402299	0.105572	1	14412	tags=98%, list=77%, signal=431%	NA
85	PURINE_NUCLEOSIDE_MONOPHOSPHATE_METABOLIC_PROCESS(7)&PURINE_RIBONUCLEOSIDE_MONOPHOSPHATE_METABOLIC_PROCESS(8)	PURINE_NUCLEOSIDE_MONOPHOSPHATE_METABOLIC_PROCESS(7)&PURINE_RIBONUCLEOSIDE_MONOPHOSPHATE_METABOLIC_PROCESS(8)	GO:0009126	Details ...	17	0.309928	1.58455	0.0449438	0.106325	1	12861	tags=100%, list=69%, signal=323%	NA
86	NEGATIVE_REGULATION_OF_CELL_CYCLE(4)	NEGATIVE_REGULATION_OF_CELL_CYCLE(4)	GO:0045786	Details ...	55	0.179897	1.57696	0.0400844	0.108851	1	14272	tags=95%, list=77%, signal=403%	NA
87	NUCLEOSIDE_MONOPHOSPHATE_METABOLIC_PROCESS(6)&RIBONUCLEOSIDE_MONOPHOSPHATE_METABOLIC_PROCESS(7)	NUCLEOSIDE_MONOPHOSPHATE_METABOLIC_PROCESS(6)&RIBONUCLEOSIDE_MONOPHOSPHATE_METABOLIC_PROCESS(7)	GO:0009123	Details ...	18	0.309945	1.57627	0.0368932	0.107882	1	12861	tags=100%, list=69%, signal=323%	NA
88	GENERATION_OF_PRECURSOR_METABOLITES_AND_ENERGY(4)	GENERATION_OF_PRECURSOR_METABOLITES_AND_ENERGY(4)	GO:0006091	Details ...	18	0.309945	1.54985	0.0409357	0.118051	1	12861	tags=100%, list=69%, signal=323%	NA
89	CELLULAR_RESPONSE_TO_CHEMICAL_STIMULUS(4)	CELLULAR_RESPONSE_TO_CHEMICAL_STIMULUS(4)	GO:0070887	Details ...	118	0.120756	1.54722	0.0445344	0.118174	1	15605	tags=96%, list=84%, signal=586%	NA
Negative NES	NAME	GS<br> follow link to MSigDB		GS DETAILS	SIZE	ES	NES	NOM p-val	FDR q-val	FWER p-val	RANK AT MAX	LEADING EDGE
1	REGULATION_OF_RNA_BIOSYNTHETIC_PROCESS(6)	REGULATION_OF_RNA_BIOSYNTHETIC_PROCESS(6)	GO:2001141	Details ...	192	-0.366522	-5.98285	0	0	0	10030	tags=90%, list=54%, signal=193%	NA
2	REGULATION_OF_RNA_METABOLIC_PROCESS(5)	REGULATION_OF_RNA_METABOLIC_PROCESS(5)	GO:0051252	Details ...	201	-0.366151	-5.97122	0	0	0	10030	tags=90%, list=54%, signal=193%	NA
3	RNA_BIOSYNTHETIC_PROCESS(6)	RNA_BIOSYNTHETIC_PROCESS(6)	GO:0032774	Details ...	203	-0.352241	-5.92288	0	0	0	10030	tags=89%, list=54%, signal=190%	NA
4	TRANSCRIPTION_FROM_RNA_POLYMERASE_II_PROMOTER(7)	TRANSCRIPTION_FROM_RNA_POLYMERASE_II_PROMOTER(7)	GO:0006366	Details ...	162	-0.392814	-5.8808	0	0	0	9307	tags=89%, list=50%, signal=176%	NA
5	TRANSCRIPTION_DNA_TEMPLATED(6)	TRANSCRIPTION_DNA_TEMPLATED(6)	GO:0006351	Details ...	199	-0.354942	-5.86443	0	0	0	10030	tags=89%, list=54%, signal=191%	NA
6	NUCLEIC_ACID_TEMPLATED_TRANSCRIPTION(7)	NUCLEIC_ACID_TEMPLATED_TRANSCRIPTION(7)	GO:0097659	Details ...	202	-0.351655	-5.83284	0	0	0	10030	tags=89%, list=54%, signal=190%	NA
7	REGULATION_OF_TRANSCRIPTION_DNA_TEMPLATED(6)&REGULATION_OF_NUCLEIC_ACID_TEMPLATED_TRANSCRIPTION(7)	REGULATION_OF_TRANSCRIPTION_DNA_TEMPLATED(6)&REGULATION_OF_NUCLEIC_ACID_TEMPLATED_TRANSCRIPTION(7)	GO:0006355	Details ...	190	-0.36543	-5.80466	0	0	0	10030	tags=90%, list=54%, signal=193%	NA
8	REGULATION_OF_TRANSCRIPTION_FROM_RNA_POLYMERASE_II_PROMOTER(7)	REGULATION_OF_TRANSCRIPTION_FROM_RNA_POLYMERASE_II_PROMOTER(7)	GO:0006357	Details ...	156	-0.394842	-5.775	0	0	0	9307	tags=89%, list=50%, signal=177%	NA
9	REGULATION_OF_NITROGEN_COMPOUND_METABOLIC_PROCESS(4)&REGULATION_OF_NUCLEOBASE_CONTAINING_COMPOUND_METABOLIC_PROCESS(5)	REGULATION_OF_NITROGEN_COMPOUND_METABOLIC_PROCESS(4)&REGULATION_OF_NUCLEOBASE_CONTAINING_COMPOUND_METABOLIC_PROCESS(5)	GO:0051171	Details ...	217	-0.327267	-5.58725	0	0	0	10030	tags=86%, list=54%, signal=184%	NA
10	NUCLEOBASE_CONTAINING_COMPOUND_BIOSYNTHETIC_PROCESS(5)	NUCLEOBASE_CONTAINING_COMPOUND_BIOSYNTHETIC_PROCESS(5)	GO:0034654	Details ...	225	-0.31768	-5.48585	0	0	0	9307	tags=81%, list=50%, signal=161%	NA
11	AROMATIC_COMPOUND_BIOSYNTHETIC_PROCESS(5)	AROMATIC_COMPOUND_BIOSYNTHETIC_PROCESS(5)	GO:0019438	Details ...	233	-0.311088	-5.47666	0	0	0	10030	tags=85%, list=54%, signal=181%	NA
12	HETEROCYCLE_BIOSYNTHETIC_PROCESS(5)	HETEROCYCLE_BIOSYNTHETIC_PROCESS(5)	GO:0018130	Details ...	231	-0.309543	-5.42306	0	0	0	9307	tags=81%, list=50%, signal=159%	NA
13	REGULATION_OF_BIOSYNTHETIC_PROCESS(4)&REGULATION_OF_CELLULAR_BIOSYNTHETIC_PROCESS(5)	REGULATION_OF_BIOSYNTHETIC_PROCESS(4)&REGULATION_OF_CELLULAR_BIOSYNTHETIC_PROCESS(5)	GO:0009889	Details ...	225	-0.309891	-5.41017	0	0	0	10030	tags=84%, list=54%, signal=181%	NA
14	REGULATION_OF_PRIMARY_METABOLIC_PROCESS(4)	REGULATION_OF_PRIMARY_METABOLIC_PROCESS(4)	GO:0080090	Details ...	305	-0.262726	-5.40568	0	0	0	10030	tags=80%, list=54%, signal=170%	NA
15	ORGANIC_CYCLIC_COMPOUND_BIOSYNTHETIC_PROCESS(5)	ORGANIC_CYCLIC_COMPOUND_BIOSYNTHETIC_PROCESS(5)	GO:1901362	Details ...	239	-0.298164	-5.32316	0	0	0	10030	tags=83%, list=54%, signal=178%	NA
16	CELLULAR_NITROGEN_COMPOUND_BIOSYNTHETIC_PROCESS(5)	CELLULAR_NITROGEN_COMPOUND_BIOSYNTHETIC_PROCESS(5)	GO:0044271	Details ...	236	-0.302657	-5.30604	0	0	0	9670	tags=82%, list=52%, signal=168%	NA
17	REGULATION_OF_MACROMOLECULE_BIOSYNTHETIC_PROCESS(5)	REGULATION_OF_MACROMOLECULE_BIOSYNTHETIC_PROCESS(5)	GO:0010556	Details ...	222	-0.307713	-5.26744	0	0	0	10030	tags=84%, list=54%, signal=180%	NA
18	REGULATION_OF_CELLULAR_MACROMOLECULE_BIOSYNTHETIC_PROCESS(6)	REGULATION_OF_CELLULAR_MACROMOLECULE_BIOSYNTHETIC_PROCESS(6)	GO:2000112	Details ...	220	-0.306229	-5.26025	0	0	0	10030	tags=84%, list=54%, signal=180%	NA
19	REGULATION_OF_CELLULAR_METABOLIC_PROCESS(4)	REGULATION_OF_CELLULAR_METABOLIC_PROCESS(4)	GO:0031323	Details ...	314	-0.252585	-5.19818	0	0	0	10030	tags=79%, list=54%, signal=168%	NA
20	POSITIVE_REGULATION_OF_GENE_EXPRESSION(5)	POSITIVE_REGULATION_OF_GENE_EXPRESSION(5)	GO:0010628	Details ...	107	-0.413411	-5.02858	0	0	0	9581	tags=93%, list=51%, signal=189%	NA
21	NERVOUS_SYSTEM_DEVELOPMENT(5)	NERVOUS_SYSTEM_DEVELOPMENT(5)	GO:0007399	Details ...	232	-0.273415	-4.99471	0	0	0	9024	tags=75%, list=48%, signal=144%	NA
22	POSITIVE_REGULATION_OF_TRANSCRIPTION_DNA_TEMPLATED(6)&POSITIVE_REGULATION_OF_RNA_BIOSYNTHETIC_PROCESS(6)&POSITIVE_REGULATION_OF_NUCLEIC_ACID_TEMPLATED_TRANSCRIPTION(7)	POSITIVE_REGULATION_OF_TRANSCRIPTION_DNA_TEMPLATED(6)&POSITIVE_REGULATION_OF_RNA_BIOSYNTHETIC_PROCESS(6)&POSITIVE_REGULATION_OF_NUCLEIC_ACID_TEMPLATED_TRANSCRIPTION(7)	GO:0045893	Details ...	97	-0.431874	-4.98166	0	0	0	8899	tags=91%, list=48%, signal=173%	NA
23	REGULATION_OF_METABOLIC_PROCESS(3)	REGULATION_OF_METABOLIC_PROCESS(3)	GO:0019222	Details ...	493	-0.19345	-4.97255	0	0	0	11722	tags=82%, list=63%, signal=215%	NA
24	POSITIVE_REGULATION_OF_RNA_METABOLIC_PROCESS(5)	POSITIVE_REGULATION_OF_RNA_METABOLIC_PROCESS(5)	GO:0051254	Details ...	98	-0.43135	-4.95449	0	0	0	9307	tags=93%, list=50%, signal=185%	NA
25	POSITIVE_REGULATION_OF_BIOSYNTHETIC_PROCESS(4)&POSITIVE_REGULATION_OF_CELLULAR_BIOSYNTHETIC_PROCESS(5)	POSITIVE_REGULATION_OF_BIOSYNTHETIC_PROCESS(4)&POSITIVE_REGULATION_OF_CELLULAR_BIOSYNTHETIC_PROCESS(5)	GO:0009891	Details ...	106	-0.411543	-4.93474	0	0	0	8899	tags=89%, list=48%, signal=169%	NA
26	POSITIVE_REGULATION_OF_MACROMOLECULE_BIOSYNTHETIC_PROCESS(5)	POSITIVE_REGULATION_OF_MACROMOLECULE_BIOSYNTHETIC_PROCESS(5)	GO:0010557	Details ...	104	-0.409309	-4.93291	0	0	0	8899	tags=88%, list=48%, signal=168%	NA
27	POSITIVE_REGULATION_OF_TRANSCRIPTION_FROM_RNA_POLYMERASE_II_PROMOTER(7)	POSITIVE_REGULATION_OF_TRANSCRIPTION_FROM_RNA_POLYMERASE_II_PROMOTER(7)	GO:0045944	Details ...	93	-0.438577	-4.89483	0	0	0	8899	tags=91%, list=48%, signal=174%	NA
28	PROTEIN_METABOLIC_PROCESS(4)	PROTEIN_METABOLIC_PROCESS(4)	GO:0019538	Details ...	468	-0.198681	-4.85437	0	0	0	12794	tags=88%, list=69%, signal=274%	NA
29	REGULATION_OF_MACROMOLECULE_METABOLIC_PROCESS(4)	REGULATION_OF_MACROMOLECULE_METABOLIC_PROCESS(4)	GO:0060255	Details ...	447	-0.20029	-4.83186	0	0	0	10030	tags=73%, list=54%, signal=155%	NA
30	SINGLE_ORGANISM_SIGNALING(3)	SINGLE_ORGANISM_SIGNALING(3)	GO:0044700	Details ...	422	-0.198204	-4.8263	0	0	0	12683	tags=87%, list=68%, signal=268%	NA
31	POSITIVE_REGULATION_OF_METABOLIC_PROCESS(3)	POSITIVE_REGULATION_OF_METABOLIC_PROCESS(3)	GO:0009893	Details ...	168	-0.309735	-4.77099	0	0	0	10030	tags=85%, list=54%, signal=181%	NA
32	POSITIVE_REGULATION_OF_NITROGEN_COMPOUND_METABOLIC_PROCESS(4)&POSITIVE_REGULATION_OF_NUCLEOBASE_CONTAINING_COMPOUND_METABOLIC_PROCESS(5)	POSITIVE_REGULATION_OF_NITROGEN_COMPOUND_METABOLIC_PROCESS(4)&POSITIVE_REGULATION_OF_NUCLEOBASE_CONTAINING_COMPOUND_METABOLIC_PROCESS(5)	GO:0051173	Details ...	103	-0.395902	-4.74961	0	0	0	9307	tags=89%, list=50%, signal=177%	NA
33	POSITIVE_REGULATION_OF_MACROMOLECULE_METABOLIC_PROCESS(4)	POSITIVE_REGULATION_OF_MACROMOLECULE_METABOLIC_PROCESS(4)	GO:0010604	Details ...	143	-0.340428	-4.74842	0	0	0	8169	tags=78%, list=44%, signal=137%	NA
34	CELL_COMMUNICATION(4)	CELL_COMMUNICATION(4)	GO:0007154	Details ...	439	-0.196371	-4.71718	0	0	0	12683	tags=87%, list=68%, signal=267%	NA
35	MOVEMENT_OF_CELL_OR_SUBCELLULAR_COMPONENT(4)	MOVEMENT_OF_CELL_OR_SUBCELLULAR_COMPONENT(4)	GO:0006928	Details ...	366	-0.212489	-4.70957	0	0	0	12562	tags=88%, list=67%, signal=266%	NA
36	REGULATION_OF_GENE_EXPRESSION(5)	REGULATION_OF_GENE_EXPRESSION(5)	GO:0010468	Details ...	374	-0.209219	-4.67922	0	0	0	10030	tags=74%, list=54%, signal=158%	NA
37	SIGNALING(2)	SIGNALING(2)	GO:0023052	Details ...	424	-0.198831	-4.60931	0	0	0	12683	tags=88%, list=68%, signal=268%	NA
38	RNA_METABOLIC_PROCESS(5)	RNA_METABOLIC_PROCESS(5)	GO:0016070	Details ...	291	-0.23283	-4.58042	0	0	0	11993	tags=87%, list=64%, signal=241%	NA
39	POSITIVE_REGULATION_OF_CELLULAR_PROCESS(3)	POSITIVE_REGULATION_OF_CELLULAR_PROCESS(3)	GO:0048522	Details ...	300	-0.230458	-4.55704	0	0	0	11116	tags=82%, list=60%, signal=201%	NA
40	NEUROGENESIS(6)	NEUROGENESIS(6)	GO:0022008	Details ...	215	-0.26292	-4.49725	0	0	0	9024	tags=74%, list=48%, signal=143%	NA
41	GENERATION_OF_NEURONS(7)	GENERATION_OF_NEURONS(7)	GO:0048699	Details ...	214	-0.261696	-4.46449	0	0	0	9024	tags=74%, list=48%, signal=142%	NA
42	POSITIVE_REGULATION_OF_CELLULAR_METABOLIC_PROCESS(4)	POSITIVE_REGULATION_OF_CELLULAR_METABOLIC_PROCESS(4)	GO:0031325	Details ...	145	-0.317987	-4.46341	0	0	0	8899	tags=79%, list=48%, signal=151%	NA
43	CELL_MIGRATION(4)	CELL_MIGRATION(4)	GO:0016477	Details ...	289	-0.227764	-4.45872	0	0	0	11231	tags=83%, list=60%, signal=205%	NA
44	REGULATION_OF_MULTICELLULAR_ORGANISMAL_DEVELOPMENT(4)	REGULATION_OF_MULTICELLULAR_ORGANISMAL_DEVELOPMENT(4)	GO:2000026	Details ...	290	-0.223577	-4.42626	0	0	0	12861	tags=91%, list=69%, signal=289%	NA
45	GENE_EXPRESSION(5)	GENE_EXPRESSION(5)	GO:0010467	Details ...	437	-0.181603	-4.40795	0	0	0	13921	tags=92%, list=75%, signal=357%	NA
46	CELLULAR_LOCALIZATION(3)	CELLULAR_LOCALIZATION(3)	GO:0051641	Details ...	349	-0.202996	-4.40383	0	0	0	12999	tags=90%, list=70%, signal=291%	NA
47	SIGNAL_TRANSDUCTION(4)	SIGNAL_TRANSDUCTION(4)	GO:0007165	Details ...	339	-0.202683	-4.3173	0	0	0	11627	tags=82%, list=62%, signal=215%	NA
48	CELLULAR_RESPONSE_TO_STIMULUS(3)	CELLULAR_RESPONSE_TO_STIMULUS(3)	GO:0051716	Details ...	416	-0.180521	-4.31251	0	0	0	12791	tags=86%, list=69%, signal=269%	NA
49	RESPONSE_TO_EXTERNAL_STIMULUS(3)	RESPONSE_TO_EXTERNAL_STIMULUS(3)	GO:0009605	Details ...	263	-0.228858	-4.29069	0	0	0	9257	tags=72%, list=50%, signal=142%	GO:0009605
50	CATABOLIC_PROCESS(3)	CATABOLIC_PROCESS(3)	GO:0009056	Details ...	269	-0.225819	-4.24951	0	0	0	12754	tags=91%, list=68%, signal=283%	NA
51	PROTEIN_MODIFICATION_PROCESS(5)&CELLULAR_PROTEIN_MODIFICATION_PROCESS(6)	PROTEIN_MODIFICATION_PROCESS(5)&CELLULAR_PROTEIN_MODIFICATION_PROCESS(6)	GO:0036211	Details ...	237	-0.23475	-4.20415	0	0	0	12899	tags=92%, list=69%, signal=297%	GO:0036211
52	NITROGEN_COMPOUND_METABOLIC_PROCESS(3)	NITROGEN_COMPOUND_METABOLIC_PROCESS(3)	GO:0006807	Details ...	469	-0.165382	-4.20204	0	0	0	14953	tags=96%, list=80%, signal=476%	NA
53	EMBRYONIC_MORPHOGENESIS(4)	EMBRYONIC_MORPHOGENESIS(4)	GO:0048598	Details ...	138	-0.302598	-4.19447	0	0	0	11956	tags=94%, list=64%, signal=261%	NA
54	CELLULAR_MACROMOLECULE_BIOSYNTHETIC_PROCESS(5)	CELLULAR_MACROMOLECULE_BIOSYNTHETIC_PROCESS(5)	GO:0034645	Details ...	295	-0.209925	-4.1532	0	0	0	10804	tags=79%, list=58%, signal=184%	NA
55	CELL_FATE_COMMITMENT(5)	CELL_FATE_COMMITMENT(5)	GO:0045165	Details ...	138	-0.30567	-4.14653	0	0	0	8389	tags=75%, list=45%, signal=136%	NA
56	SINGLE_ORGANISM_TRANSPORT(3)	SINGLE_ORGANISM_TRANSPORT(3)	GO:0044765	Details ...	456	-0.166059	-4.1354	0	0	0	12999	tags=86%, list=70%, signal=277%	NA
57	CELL_MOTILITY(3)&LOCALIZATION_OF_CELL(3)	CELL_MOTILITY(3)&LOCALIZATION_OF_CELL(3)	GO:0048870	Details ...	297	-0.208648	-4.12516	0	0	0	11231	tags=81%, list=60%, signal=200%	NA
58	MACROMOLECULE_BIOSYNTHETIC_PROCESS(5)	MACROMOLECULE_BIOSYNTHETIC_PROCESS(5)	GO:0009059	Details ...	300	-0.206873	-4.1088	0	0	0	10741	tags=78%, list=58%, signal=181%	NA
59	CELLULAR_PROTEIN_METABOLIC_PROCESS(5)	CELLULAR_PROTEIN_METABOLIC_PROCESS(5)	GO:0044267	Details ...	331	-0.196532	-4.10153	0	0	0	13178	tags=90%, list=71%, signal=302%	NA
60	ESTABLISHMENT_OF_LOCALIZATION_IN_CELL(4)	ESTABLISHMENT_OF_LOCALIZATION_IN_CELL(4)	GO:0051649	Details ...	310	-0.205769	-4.09918	0	0	0	12999	tags=90%, list=70%, signal=293%	NA
61	BEHAVIOR(2)	BEHAVIOR(2)	GO:0007610	Details ...	487	-0.166812	-4.0978	0	0	0	12124	tags=81%, list=65%, signal=227%	NA
62	NEURON_DIFFERENTIATION(6)	NEURON_DIFFERENTIATION(6)	GO:0030182	Details ...	196	-0.253228	-4.08261	0	0	0	9306	tags=75%, list=50%, signal=148%	NA
63	REGULATION_OF_LOCALIZATION(3)	REGULATION_OF_LOCALIZATION(3)	GO:0032879	Details ...	176	-0.264488	-4.06874	0	0	0	12163	tags=91%, list=65%, signal=261%	NA
64	CELLULAR_NITROGEN_COMPOUND_METABOLIC_PROCESS(4)	CELLULAR_NITROGEN_COMPOUND_METABOLIC_PROCESS(4)	GO:0034641	Details ...	440	-0.165	-4.04719	0	0	0	14953	tags=96%, list=80%, signal=477%	NA
65	HETEROCYCLE_METABOLIC_PROCESS(4)	HETEROCYCLE_METABOLIC_PROCESS(4)	GO:0046483	Details ...	423	-0.169201	-4.03325	0	0	0	12424	tags=83%, list=67%, signal=244%	NA
66	REGULATION_OF_RESPONSE_TO_STIMULUS(3)	REGULATION_OF_RESPONSE_TO_STIMULUS(3)	GO:0048583	Details ...	226	-0.226048	-4.0167	0	0	0	11916	tags=86%, list=64%, signal=236%	NA
67	POST_EMBRYONIC_ORGAN_DEVELOPMENT(4)	POST_EMBRYONIC_ORGAN_DEVELOPMENT(4)	GO:0048569	Details ...	313	-0.194815	-4.0014	0	0	0	12861	tags=88%, list=69%, signal=280%	NA
68	CELLULAR_AROMATIC_COMPOUND_METABOLIC_PROCESS(4)	CELLULAR_AROMATIC_COMPOUND_METABOLIC_PROCESS(4)	GO:0006725	Details ...	421	-0.173227	-3.99194	0	0	0	12424	tags=84%, list=67%, signal=245%	NA
69	NUCLEOBASE_CONTAINING_COMPOUND_METABOLIC_PROCESS(4)	NUCLEOBASE_CONTAINING_COMPOUND_METABOLIC_PROCESS(4)	GO:0006139	Details ...	412	-0.171962	-3.98998	0	0	0	12424	tags=83%, list=67%, signal=245%	NA
70	MACROMOLECULE_CATABOLIC_PROCESS(5)	MACROMOLECULE_CATABOLIC_PROCESS(5)	GO:0009057	Details ...	207	-0.235992	-3.97559	0	0	0	12754	tags=92%, list=68%, signal=288%	NA
71	ORGANIC_CYCLIC_COMPOUND_METABOLIC_PROCESS(4)	ORGANIC_CYCLIC_COMPOUND_METABOLIC_PROCESS(4)	GO:1901360	Details ...	434	-0.167857	-3.9638	0	0	0	14075	tags=92%, list=76%, signal=367%	NA
72	REGULATION_OF_VULVAL_DEVELOPMENT(6)	REGULATION_OF_VULVAL_DEVELOPMENT(6)	GO:0040028	Details ...	229	-0.229605	-3.96154	0	0	0	12861	tags=92%, list=69%, signal=292%	NA
73	ORGANIC_SUBSTANCE_CATABOLIC_PROCESS(4)	ORGANIC_SUBSTANCE_CATABOLIC_PROCESS(4)	GO:1901575	Details ...	245	-0.216299	-3.95759	0	0	0	12754	tags=90%, list=68%, signal=281%	NA
74	CELL_SURFACE_RECEPTOR_SIGNALING_PATHWAY(5)	CELL_SURFACE_RECEPTOR_SIGNALING_PATHWAY(5)	GO:0007166	Details ...	167	-0.262693	-3.94368	0	0	0	10881	tags=84%, list=58%, signal=201%	NA
75	REGULATION_OF_POST_EMBRYONIC_DEVELOPMENT(5)&REGULATION_OF_NEMATODE_LARVAL_DEVELOPMENT(6)	REGULATION_OF_POST_EMBRYONIC_DEVELOPMENT(5)&REGULATION_OF_NEMATODE_LARVAL_DEVELOPMENT(6)	GO:0048580	Details ...	239	-0.22477	-3.92776	0	0	0	12861	tags=91%, list=69%, signal=291%	NA
76	VULVAL_DEVELOPMENT(5)	VULVAL_DEVELOPMENT(5)	GO:0040025	Details ...	310	-0.193619	-3.92339	0	0	0	12861	tags=88%, list=69%, signal=280%	NA
77	CELL_FATE_SPECIFICATION(5)	CELL_FATE_SPECIFICATION(5)	GO:0001708	Details ...	107	-0.327364	-3.91609	0	0	0	8389	tags=78%, list=45%, signal=140%	NA
78	MACROMOLECULE_MODIFICATION(5)	MACROMOLECULE_MODIFICATION(5)	GO:0043412	Details ...	252	-0.216298	-3.88348	0	0	0	13178	tags=92%, list=71%, signal=310%	NA
79	CELLULAR_BIOSYNTHETIC_PROCESS(4)	CELLULAR_BIOSYNTHETIC_PROCESS(4)	GO:0044249	Details ...	387	-0.170197	-3.87395	0	0	0	10809	tags=75%, list=58%, signal=174%	NA
80	SINGLE_ORGANISM_ORGANELLE_ORGANIZATION(4)	SINGLE_ORGANISM_ORGANELLE_ORGANIZATION(4)	GO:1902589	Details ...	492	-0.150631	-3.85363	0	0	0	14953	tags=95%, list=80%, signal=468%	NA
81	BIOSYNTHETIC_PROCESS(3)	BIOSYNTHETIC_PROCESS(3)	GO:0009058	Details ...	397	-0.164428	-3.80663	0	0	0	14179	tags=92%, list=76%, signal=378%	NA
82	MACROMOLECULAR_COMPLEX_SUBUNIT_ORGANIZATION(4)	MACROMOLECULAR_COMPLEX_SUBUNIT_ORGANIZATION(4)	GO:0043933	Details ...	320	-0.182514	-3.77288	0	0	0	13718	tags=92%, list=74%, signal=341%	NA
83	CYTOSKELETON_ORGANIZATION(4)	CYTOSKELETON_ORGANIZATION(4)	GO:0007010	Details ...	324	-0.178564	-3.72809	0	0	0	14673	tags=96%, list=79%, signal=445%	NA
84	ORGANIC_SUBSTANCE_BIOSYNTHETIC_PROCESS(4)	ORGANIC_SUBSTANCE_BIOSYNTHETIC_PROCESS(4)	GO:1901576	Details ...	394	-0.163794	-3.70322	0	0	0	14179	tags=92%, list=76%, signal=377%	NA
85	NUCLEIC_ACID_METABOLIC_PROCESS(5)	NUCLEIC_ACID_METABOLIC_PROCESS(5)	GO:0090304	Details ...	360	-0.168771	-3.69486	0	0	0	12909	tags=86%, list=69%, signal=274%	NA
86	REGULATION_OF_LOCOMOTION(3)	REGULATION_OF_LOCOMOTION(3)	GO:0040012	Details ...	154	-0.250489	-3.69416	0	0	0	12189	tags=90%, list=65%, signal=259%	NA
87	NEURON_DEVELOPMENT(5)	NEURON_DEVELOPMENT(5)	GO:0048666	Details ...	179	-0.239485	-3.68973	0	0	0	9217	tags=73%, list=49%, signal=143%	NA
88	CELLULAR_COMPONENT_BIOGENESIS(3)	CELLULAR_COMPONENT_BIOGENESIS(3)	GO:0044085	Details ...	301	-0.180467	-3.68788	0	0	0	14148	tags=94%, list=76%, signal=383%	NA
89	NEGATIVE_REGULATION_OF_POST_EMBRYONIC_DEVELOPMENT(4)&NEGATIVE_REGULATION_OF_NEMATODE_LARVAL_DEVELOPMENT(5)	NEGATIVE_REGULATION_OF_POST_EMBRYONIC_DEVELOPMENT(4)&NEGATIVE_REGULATION_OF_NEMATODE_LARVAL_DEVELOPMENT(5)	GO:0048581	Details ...	189	-0.227535	-3.68654	0	0	0	12760	tags=91%, list=68%, signal=286%	NA
90	PROTEIN_CATABOLIC_PROCESS(5)	PROTEIN_CATABOLIC_PROCESS(5)	GO:0030163	Details ...	164	-0.244477	-3.65713	0	0	0	12754	tags=93%, list=68%, signal=291%	NA
91	NEGATIVE_REGULATION_OF_VULVAL_DEVELOPMENT(6)	NEGATIVE_REGULATION_OF_VULVAL_DEVELOPMENT(6)	GO:0040027	Details ...	187	-0.226538	-3.64959	0	0	0	12760	tags=91%, list=68%, signal=286%	NA
92	REGULATION_OF_CELLULAR_COMPONENT_ORGANIZATION(3)	REGULATION_OF_CELLULAR_COMPONENT_ORGANIZATION(3)	GO:0051128	Details ...	233	-0.212319	-3.64664	0	0	0	12167	tags=86%, list=65%, signal=246%	NA
93	RESPONSE_TO_CHEMICAL(3)	RESPONSE_TO_CHEMICAL(3)	GO:0042221	Details ...	322	-0.174082	-3.61885	0	0	0	12436	tags=84%, list=67%, signal=248%	NA
94	NEGATIVE_REGULATION_OF_MULTICELLULAR_ORGANISMAL_PROCESS(3)	NEGATIVE_REGULATION_OF_MULTICELLULAR_ORGANISMAL_PROCESS(3)	GO:0051241	Details ...	216	-0.215824	-3.60217	0	0	0	12760	tags=90%, list=68%, signal=282%	NA
95	MULTI_MULTICELLULAR_ORGANISM_PROCESS(3)	MULTI_MULTICELLULAR_ORGANISM_PROCESS(3)	GO:0044706	Details ...	360	-0.159606	-3.57079	0	0	0	14008	tags=91%, list=75%, signal=359%	NA
96	NEGATIVE_REGULATION_OF_CELLULAR_PROCESS(3)	NEGATIVE_REGULATION_OF_CELLULAR_PROCESS(3)	GO:0048523	Details ...	244	-0.200695	-3.56625	0	0	0	11124	tags=80%, list=60%, signal=195%	NA
97	CELL_MORPHOGENESIS(5)	CELL_MORPHOGENESIS(5)	GO:0000902	Details ...	142	-0.25885	-3.56247	0	0	0	9910	tags=79%, list=53%, signal=167%	NA
98	CELLULAR_COMPONENT_ASSEMBLY(4)	CELLULAR_COMPONENT_ASSEMBLY(4)	GO:0022607	Details ...	292	-0.178402	-3.56029	0	0	0	14148	tags=93%, list=76%, signal=382%	NA
99	CELLULAR_COMPONENT_MORPHOGENESIS(4)	CELLULAR_COMPONENT_MORPHOGENESIS(4)	GO:0032989	Details ...	287	-0.185552	-3.54686	0	0	0	12307	tags=84%, list=66%, signal=245%	NA
100	CELL_MORPHOGENESIS_INVOLVED_IN_DIFFERENTIATION(5)	CELL_MORPHOGENESIS_INVOLVED_IN_DIFFERENTIATION(5)	GO:0000904	Details ...	95	-0.303579	-3.49986	0	0	0	9867	tags=83%, list=53%, signal=176%	NA
101	CHEMOTAXIS(4)	CHEMOTAXIS(4)	GO:0006935	Details ...	113	-0.284053	-3.49433	0	0	0	9250	tags=78%, list=50%, signal=154%	NA
102	REPRODUCTIVE_BEHAVIOR(3)&MULTI_ORGANISM_REPRODUCTIVE_BEHAVIOR(4)	REPRODUCTIVE_BEHAVIOR(3)&MULTI_ORGANISM_REPRODUCTIVE_BEHAVIOR(4)	GO:0019098	Details ...	358	-0.159066	-3.48045	0	0	0	14008	tags=91%, list=75%, signal=359%	NA
103	CELL_PROJECTION_MORPHOGENESIS(5)	CELL_PROJECTION_MORPHOGENESIS(5)	GO:0048858	Details ...	127	-0.265228	-3.47285	0	0	0	9910	tags=80%, list=53%, signal=169%	NA
104	TAXIS(3)	TAXIS(3)	GO:0042330	Details ...	120	-0.271988	-3.47141	0	0	0	9250	tags=77%, list=50%, signal=151%	NA
105	NEURON_PROJECTION_DEVELOPMENT(5)	NEURON_PROJECTION_DEVELOPMENT(5)	GO:0031175	Details ...	167	-0.231971	-3.4704	0	0	0	9217	tags=72%, list=49%, signal=142%	NA
106	PROTEIN_LOCALIZATION(4)	PROTEIN_LOCALIZATION(4)	GO:0008104	Details ...	205	-0.209939	-3.46844	0	0	0	12946	tags=90%, list=69%, signal=292%	NA
107	MULTI_ORGANISM_BEHAVIOR(3)	MULTI_ORGANISM_BEHAVIOR(3)	GO:0051705	Details ...	360	-0.159606	-3.46773	0	0	0	14008	tags=91%, list=75%, signal=359%	NA
108	GASTRULATION(4)	GASTRULATION(4)	GO:0007369	Details ...	49	-0.420203	-3.44957	0	0	0	7782	tags=84%, list=42%, signal=143%	NA
109	PHOSPHATE_CONTAINING_COMPOUND_METABOLIC_PROCESS(5)	PHOSPHATE_CONTAINING_COMPOUND_METABOLIC_PROCESS(5)	GO:0006796	Details ...	212	-0.199781	-3.44012	0	0	0	13634	tags=93%, list=73%, signal=343%	GO:0006796
110	PHOSPHORUS_METABOLIC_PROCESS(4)	PHOSPHORUS_METABOLIC_PROCESS(4)	GO:0006793	Details ...	213	-0.200128	-3.42931	0	0	0	13634	tags=93%, list=73%, signal=343%	GO:0006793
111	REGULATION_OF_SIGNALING(3)	REGULATION_OF_SIGNALING(3)	GO:0023051	Details ...	164	-0.226293	-3.42851	0	0	0	12749	tags=91%, list=68%, signal=285%	NA
112	NEGATIVE_REGULATION_OF_RNA_METABOLIC_PROCESS(5)&NEGATIVE_REGULATION_OF_TRANSCRIPTION_DNA_TEMPLATED(6)&NEGATIVE_REGULATION_OF_RNA_BIOSYNTHETIC_PROCESS(6)&NEGATIVE_REGULATION_OF_NUCLEIC_ACID_TEMPLATED_TRANSCRIPTION(7)	NEGATIVE_REGULATION_OF_RNA_METABOLIC_PROCESS(5)&NEGATIVE_REGULATION_OF_TRANSCRIPTION_DNA_TEMPLATED(6)&NEGATIVE_REGULATION_OF_RNA_BIOSYNTHETIC_PROCESS(6)&NEGATIVE_REGULATION_OF_NUCLEIC_ACID_TEMPLATED_TRANSCRIPTION(7)	GO:0051253	Details ...	60	-0.37493	-3.41084	0	0	0	8564	tags=83%, list=46%, signal=154%	NA
113	MULTICELLULAR_ORGANISMAL_REPRODUCTIVE_BEHAVIOR(4)	MULTICELLULAR_ORGANISMAL_REPRODUCTIVE_BEHAVIOR(4)	GO:0033057	Details ...	355	-0.158246	-3.40702	0	0	0	14008	tags=91%, list=75%, signal=359%	NA
114	NEGATIVE_REGULATION_OF_DEVELOPMENTAL_PROCESS(3)	NEGATIVE_REGULATION_OF_DEVELOPMENTAL_PROCESS(3)	GO:0051093	Details ...	207	-0.206355	-3.40583	0	0	0	12760	tags=89%, list=68%, signal=279%	NA
115	NEURON_PROJECTION_MORPHOGENESIS(6)	NEURON_PROJECTION_MORPHOGENESIS(6)	GO:0048812	Details ...	97	-0.29674	-3.39027	0	0	0	9867	tags=82%, list=53%, signal=174%	NA
116	CELL_MORPHOGENESIS_INVOLVED_IN_NEURON_DIFFERENTIATION(6)	CELL_MORPHOGENESIS_INVOLVED_IN_NEURON_DIFFERENTIATION(6)	GO:0048667	Details ...	94	-0.301762	-3.39005	0	0	0	9867	tags=83%, list=53%, signal=176%	NA
117	CELL_PROJECTION_ORGANIZATION(4)	CELL_PROJECTION_ORGANIZATION(4)	GO:0030030	Details ...	208	-0.200337	-3.37796	0	0	0	9119	tags=69%, list=49%, signal=133%	NA
118	PROTEIN_COMPLEX_SUBUNIT_ORGANIZATION(5)	PROTEIN_COMPLEX_SUBUNIT_ORGANIZATION(5)	GO:0071822	Details ...	270	-0.178038	-3.3522	0	0	0	14673	tags=96%, list=79%, signal=447%	NA
119	CELL_PART_MORPHOGENESIS(5)	CELL_PART_MORPHOGENESIS(5)	GO:0032990	Details ...	131	-0.248518	-3.34377	0	0	0	9910	tags=78%, list=53%, signal=165%	NA
120	REGULATION_OF_CELL_COMMUNICATION(4)	REGULATION_OF_CELL_COMMUNICATION(4)	GO:0010646	Details ...	168	-0.222533	-3.30975	0	0	0	12749	tags=90%, list=68%, signal=284%	NA
121	OVIPOSITION(5)	OVIPOSITION(5)	GO:0018991	Details ...	335	-0.155461	-3.30563	0	0	0	14008	tags=90%, list=75%, signal=358%	NA
122	AXONOGENESIS(7)	AXONOGENESIS(7)	GO:0007409	Details ...	91	-0.296074	-3.28911	0	0	0	9867	tags=82%, list=53%, signal=174%	NA
123	SINGLE_ORGANISM_METABOLIC_PROCESS(3)	SINGLE_ORGANISM_METABOLIC_PROCESS(3)	GO:0044710	Details ...	404	-0.142463	-3.23221	0	0	0	15113	tags=95%, list=81%, signal=492%	NA
124	ANATOMICAL_STRUCTURE_FORMATION_INVOLVED_IN_MORPHOGENESIS(3)	ANATOMICAL_STRUCTURE_FORMATION_INVOLVED_IN_MORPHOGENESIS(3)	GO:0048646	Details ...	224	-0.18797	-3.20956	0	0	0	14673	tags=97%, list=79%, signal=453%	NA
125	TISSUE_DEVELOPMENT(4)	TISSUE_DEVELOPMENT(4)	GO:0009888	Details ...	103	-0.269403	-3.2045	0	0	0	8214	tags=71%, list=44%, signal=126%	NA
126	NEURON_PROJECTION_GUIDANCE(5)&AXON_GUIDANCE(6)	NEURON_PROJECTION_GUIDANCE(5)&AXON_GUIDANCE(6)	GO:0097485	Details ...	76	-0.313838	-3.19957	0	0	0	9867	tags=84%, list=53%, signal=178%	NA
127	ORGANELLE_ASSEMBLY(4)	ORGANELLE_ASSEMBLY(4)	GO:0070925	Details ...	200	-0.193127	-3.17782	0	0	0	13582	tags=92%, list=73%, signal=336%	NA
128	CELL_FATE_COMMITMENT_INVOLVED_IN_FORMATION_OF_PRIMARY_GERM_LAYER(5)	CELL_FATE_COMMITMENT_INVOLVED_IN_FORMATION_OF_PRIMARY_GERM_LAYER(5)	GO:0060795	Details ...	33	-0.469097	-3.17645	0	0	0	8214	tags=91%, list=44%, signal=162%	NA
129	NEGATIVE_REGULATION_OF_TRANSCRIPTION_FROM_RNA_POLYMERASE_II_PROMOTER(7)	NEGATIVE_REGULATION_OF_TRANSCRIPTION_FROM_RNA_POLYMERASE_II_PROMOTER(7)	GO:0000122	Details ...	47	-0.392444	-3.14683	0	0	0	8564	tags=85%, list=46%, signal=157%	NA
130	REGULATION_OF_SIGNAL_TRANSDUCTION(4)	REGULATION_OF_SIGNAL_TRANSDUCTION(4)	GO:0009966	Details ...	128	-0.236989	-3.11727	0	0	0	11627	tags=86%, list=62%, signal=227%	NA
131	INTRACELLULAR_SIGNAL_TRANSDUCTION(5)	INTRACELLULAR_SIGNAL_TRANSDUCTION(5)	GO:0035556	Details ...	114	-0.248011	-3.1032	0	0	0	13059	tags=95%, list=70%, signal=315%	NA
132	NEGATIVE_REGULATION_OF_NITROGEN_COMPOUND_METABOLIC_PROCESS(4)&NEGATIVE_REGULATION_OF_NUCLEOBASE_CONTAINING_COMPOUND_METABOLIC_PROCESS(5)	NEGATIVE_REGULATION_OF_NITROGEN_COMPOUND_METABOLIC_PROCESS(4)&NEGATIVE_REGULATION_OF_NUCLEOBASE_CONTAINING_COMPOUND_METABOLIC_PROCESS(5)	GO:0051172	Details ...	65	-0.326143	-3.09863	0	0	0	8564	tags=78%, list=46%, signal=145%	NA
133	MALE_SEX_DIFFERENTIATION(5)	MALE_SEX_DIFFERENTIATION(5)	GO:0046661	Details ...	86	-0.288319	-3.09481	0	0	0	11552	tags=91%, list=62%, signal=238%	NA
134	NEMATODE_MALE_TAIL_TIP_MORPHOGENESIS(5)	NEMATODE_MALE_TAIL_TIP_MORPHOGENESIS(5)	GO:0045138	Details ...	77	-0.290303	-3.05476	0	1.11e-05	0.001	11552	tags=91%, list=62%, signal=238%	NA
135	MALE_ANATOMICAL_STRUCTURE_MORPHOGENESIS(4)	MALE_ANATOMICAL_STRUCTURE_MORPHOGENESIS(4)	GO:0090598	Details ...	78	-0.291489	-3.05178	0	1.1e-05	0.001	11552	tags=91%, list=62%, signal=239%	NA
136	MACROMOLECULAR_COMPLEX_ASSEMBLY(5)	MACROMOLECULAR_COMPLEX_ASSEMBLY(5)	GO:0065003	Details ...	192	-0.189096	-3.04154	0	1.09e-05	0.001	14466	tags=96%, list=78%, signal=427%	NA
137	CELLULAR_CATABOLIC_PROCESS(4)	CELLULAR_CATABOLIC_PROCESS(4)	GO:0044248	Details ...	149	-0.218024	-3.04071	0	1.08e-05	0.001	13102	tags=92%, list=70%, signal=307%	NA
138	FORMATION_OF_PRIMARY_GERM_LAYER(4)	FORMATION_OF_PRIMARY_GERM_LAYER(4)	GO:0001704	Details ...	36	-0.4211	-3.01195	0	1.08e-05	0.001	8214	tags=86%, list=44%, signal=154%	NA
139	ASYMMETRIC_CELL_DIVISION(5)	ASYMMETRIC_CELL_DIVISION(5)	GO:0008356	Details ...	34	-0.419639	-3.0096	0	1.07e-05	0.001	10280	tags=97%, list=55%, signal=216%	NA
140	DIGESTIVE_TRACT_DEVELOPMENT(4)&DIGESTIVE_SYSTEM_DEVELOPMENT(5)	DIGESTIVE_TRACT_DEVELOPMENT(4)&DIGESTIVE_SYSTEM_DEVELOPMENT(5)	GO:0048565	Details ...	59	-0.324496	-2.98069	0	2.12e-05	0.002	10395	tags=88%, list=56%, signal=199%	NA
141	ACTIN_FILAMENT_BASED_PROCESS(4)	ACTIN_FILAMENT_BASED_PROCESS(4)	GO:0030029	Details ...	183	-0.18701	-2.97079	0	2.11e-05	0.002	14673	tags=97%, list=79%, signal=453%	NA
142	IMMUNE_SYSTEM_PROCESS(2)	IMMUNE_SYSTEM_PROCESS(2)	GO:0002376	Details ...	141	-0.212632	-2.95399	0	2.09e-05	0.002	5451	tags=50%, list=29%, signal=71%	GO:0002376
143	IMMUNE_RESPONSE(3)	IMMUNE_RESPONSE(3)	GO:0006955	Details ...	140	-0.209314	-2.95123	0	2.08e-05	0.002	5313	tags=49%, list=29%, signal=68%	GO:0006955
144	NEGATIVE_REGULATION_OF_BIOSYNTHETIC_PROCESS(4)&NEGATIVE_REGULATION_OF_CELLULAR_BIOSYNTHETIC_PROCESS(5)	NEGATIVE_REGULATION_OF_BIOSYNTHETIC_PROCESS(4)&NEGATIVE_REGULATION_OF_CELLULAR_BIOSYNTHETIC_PROCESS(5)	GO:0009890	Details ...	76	-0.291579	-2.94592	0	2.06e-05	0.002	8564	tags=75%, list=46%, signal=138%	NA
145	MEMBRANE_ORGANIZATION(4)	MEMBRANE_ORGANIZATION(4)	GO:0061024	Details ...	132	-0.219988	-2.94266	0	2.05e-05	0.002	12163	tags=87%, list=65%, signal=249%	NA
146	NEGATIVE_REGULATION_OF_MACROMOLECULE_BIOSYNTHETIC_PROCESS(5)&NEGATIVE_REGULATION_OF_CELLULAR_MACROMOLECULE_BIOSYNTHETIC_PROCESS(6)	NEGATIVE_REGULATION_OF_MACROMOLECULE_BIOSYNTHETIC_PROCESS(5)&NEGATIVE_REGULATION_OF_CELLULAR_MACROMOLECULE_BIOSYNTHETIC_PROCESS(6)	GO:0010558	Details ...	75	-0.288217	-2.93315	0	2.03e-05	0.002	8564	tags=75%, list=46%, signal=138%	NA
147	AXON_DEVELOPMENT(6)	AXON_DEVELOPMENT(6)	GO:0061564	Details ...	145	-0.210427	-2.93211	0	2.02e-05	0.002	9217	tags=70%, list=49%, signal=138%	NA
148	PROTEIN_COMPLEX_BIOGENESIS(4)&PROTEIN_COMPLEX_ASSEMBLY(5)	PROTEIN_COMPLEX_BIOGENESIS(4)&PROTEIN_COMPLEX_ASSEMBLY(5)	GO:0070271	Details ...	181	-0.186746	-2.923	0	2.01e-05	0.002	14466	tags=96%, list=78%, signal=426%	NA
149	INNATE_IMMUNE_RESPONSE(4)	INNATE_IMMUNE_RESPONSE(4)	GO:0045087	Details ...	139	-0.212875	-2.91717	0	1.99e-05	0.002	5313	tags=50%, list=29%, signal=69%	GO:0045087
150	TUBE_DEVELOPMENT(4)	TUBE_DEVELOPMENT(4)	GO:0035295	Details ...	62	-0.314126	-2.91122	0	1.98e-05	0.002	10395	tags=87%, list=56%, signal=196%	NA
151	MUSCLE_STRUCTURE_DEVELOPMENT(4)	MUSCLE_STRUCTURE_DEVELOPMENT(4)	GO:0061061	Details ...	181	-0.186453	-2.90295	0	2.94e-05	0.003	12001	tags=83%, list=64%, signal=231%	NA
152	REGULATION_OF_CELL_MIGRATION(5)	REGULATION_OF_CELL_MIGRATION(5)	GO:0030334	Details ...	57	-0.320094	-2.8726	0	3.98e-05	0.004	11706	tags=95%, list=63%, signal=254%	NA
153	MITOTIC_CELL_CYCLE_PROCESS(5)	MITOTIC_CELL_CYCLE_PROCESS(5)	GO:1903047	Details ...	195	-0.176646	-2.87218	0	3.96e-05	0.004	14611	tags=96%, list=78%, signal=440%	NA
154	ESTABLISHMENT_OF_ORGANELLE_LOCALIZATION(4)	ESTABLISHMENT_OF_ORGANELLE_LOCALIZATION(4)	GO:0051656	Details ...	130	-0.216447	-2.86536	0	3.93e-05	0.004	10758	tags=79%, list=58%, signal=186%	NA
155	CELLULAR_MACROMOLECULAR_COMPLEX_ASSEMBLY(6)	CELLULAR_MACROMOLECULAR_COMPLEX_ASSEMBLY(6)	GO:0034622	Details ...	180	-0.18652	-2.85162	0	3.9e-05	0.004	14673	tags=97%, list=79%, signal=453%	NA
156	PHAGOCYTOSIS(4)	PHAGOCYTOSIS(4)	GO:0006909	Details ...	110	-0.230395	-2.84739	0	4.86e-05	0.005	12163	tags=88%, list=65%, signal=253%	NA
157	ACTIN_CYTOSKELETON_ORGANIZATION(5)	ACTIN_CYTOSKELETON_ORGANIZATION(5)	GO:0030036	Details ...	176	-0.185842	-2.83978	0	4.83e-05	0.005	14673	tags=97%, list=79%, signal=453%	NA
158	NEGATIVE_REGULATION_OF_METABOLIC_PROCESS(3)	NEGATIVE_REGULATION_OF_METABOLIC_PROCESS(3)	GO:0009892	Details ...	239	-0.158904	-2.83591	0	4.8e-05	0.005	13059	tags=86%, list=70%, signal=283%	NA
159	NEGATIVE_REGULATION_OF_MACROMOLECULE_METABOLIC_PROCESS(4)	NEGATIVE_REGULATION_OF_MACROMOLECULE_METABOLIC_PROCESS(4)	GO:0010605	Details ...	230	-0.159171	-2.81162	0	4.77e-05	0.005	13921	tags=90%, list=75%, signal=353%	NA
160	CELLULAR_PROTEIN_COMPLEX_ASSEMBLY(6)	CELLULAR_PROTEIN_COMPLEX_ASSEMBLY(6)	GO:0043623	Details ...	170	-0.184769	-2.80457	0	5.69e-05	0.006	14673	tags=97%, list=79%, signal=453%	NA
161	DENDRITE_DEVELOPMENT(4)	DENDRITE_DEVELOPMENT(4)	GO:0016358	Details ...	37	-0.381483	-2.79452	0	5.65e-05	0.006	9021	tags=86%, list=48%, signal=167%	NA
162	MICROTUBULE_BASED_PROCESS(4)	MICROTUBULE_BASED_PROCESS(4)	GO:0007017	Details ...	177	-0.180629	-2.7825	0	5.62e-05	0.006	13404	tags=90%, list=72%, signal=317%	NA
163	REGULATION_OF_MOLECULAR_FUNCTION(3)	REGULATION_OF_MOLECULAR_FUNCTION(3)	GO:0065009	Details ...	86	-0.258819	-2.78079	0	5.58e-05	0.006	12749	tags=94%, list=68%, signal=297%	NA
164	CELLULAR_COMPONENT_ASSEMBLY_INVOLVED_IN_MORPHOGENESIS(4)	CELLULAR_COMPONENT_ASSEMBLY_INVOLVED_IN_MORPHOGENESIS(4)	GO:0010927	Details ...	168	-0.184396	-2.77901	0	5.55e-05	0.006	14673	tags=97%, list=79%, signal=453%	NA
165	PATTERN_SPECIFICATION_PROCESS(4)	PATTERN_SPECIFICATION_PROCESS(4)	GO:0007389	Details ...	60	-0.30318	-2.76752	0	5.51e-05	0.006	10207	tags=85%, list=55%, signal=187%	NA
166	MESODERM_DEVELOPMENT(5)	MESODERM_DEVELOPMENT(5)	GO:0007498	Details ...	18	-0.541175	-2.76094	0	6.45e-05	0.007	6489	tags=89%, list=35%, signal=136%	NA
167	REGULATION_OF_CELLULAR_COMPONENT_MOVEMENT(4)	REGULATION_OF_CELLULAR_COMPONENT_MOVEMENT(4)	GO:0051270	Details ...	64	-0.294633	-2.75235	0	6.42e-05	0.007	11706	tags=92%, list=63%, signal=247%	NA
168	SMALL_GTPASE_MEDIATED_SIGNAL_TRANSDUCTION(6)	SMALL_GTPASE_MEDIATED_SIGNAL_TRANSDUCTION(6)	GO:0007264	Details ...	48	-0.336905	-2.75067	0	7.33e-05	0.008	11595	tags=96%, list=62%, signal=253%	NA
169	G_PROTEIN_COUPLED_RECEPTOR_SIGNALING_PATHWAY(6)	G_PROTEIN_COUPLED_RECEPTOR_SIGNALING_PATHWAY(6)	GO:0007186	Details ...	50	-0.324158	-2.73655	0	9.17e-05	0.01	8510	tags=78%, list=46%, signal=143%	NA
170	ENDODERM_DEVELOPMENT(5)	ENDODERM_DEVELOPMENT(5)	GO:0007492	Details ...	20	-0.509723	-2.73564	0	9.12e-05	0.01	8214	tags=95%, list=44%, signal=170%	NA
171	ORGAN_MORPHOGENESIS(4)	ORGAN_MORPHOGENESIS(4)	GO:0009887	Details ...	57	-0.313786	-2.72753	0	9.95e-05	0.011	9862	tags=84%, list=53%, signal=178%	NA
172	RESPONSE_TO_EXTRACELLULAR_STIMULUS(4)	RESPONSE_TO_EXTRACELLULAR_STIMULUS(4)	GO:0009991	Details ...	36	-0.392332	-2.72463	0	9.89e-05	0.011	9784	tags=92%, list=53%, signal=193%	NA
173	REGULATION_OF_CELL_DIFFERENTIATION(4)	REGULATION_OF_CELL_DIFFERENTIATION(4)	GO:0045595	Details ...	75	-0.26441	-2.72421	0	9.83e-05	0.011	9751	tags=79%, list=52%, signal=164%	NA
174	PHAGOCYTOSIS_ENGULFMENT(5)&MEMBRANE_INVAGINATION(5)	PHAGOCYTOSIS_ENGULFMENT(5)&MEMBRANE_INVAGINATION(5)	GO:0006911	Details ...	93	-0.240893	-2.72337	0	9.78e-05	0.011	12163	tags=89%, list=65%, signal=256%	NA
175	ORGANELLE_LOCALIZATION(4)	ORGANELLE_LOCALIZATION(4)	GO:0051640	Details ...	133	-0.203514	-2.71137	0	0.000124	0.014	12486	tags=87%, list=67%, signal=263%	NA
176	NEGATIVE_REGULATION_OF_RESPONSE_TO_STIMULUS(3)	NEGATIVE_REGULATION_OF_RESPONSE_TO_STIMULUS(3)	GO:0048585	Details ...	71	-0.273935	-2.71052	0	0.000123	0.014	8562	tags=73%, list=46%, signal=135%	NA
177	RAS_PROTEIN_SIGNAL_TRANSDUCTION(7)	RAS_PROTEIN_SIGNAL_TRANSDUCTION(7)	GO:0007265	Details ...	46	-0.335053	-2.70671	0	0.000123	0.014	11595	tags=96%, list=62%, signal=253%	NA
178	REGULATION_OF_TRANSPORT(4)	REGULATION_OF_TRANSPORT(4)	GO:0051049	Details ...	73	-0.26714	-2.67139	0	0.000166	0.019	10867	tags=85%, list=58%, signal=203%	NA
179	MUSCLE_CELL_DIFFERENTIATION(5)	MUSCLE_CELL_DIFFERENTIATION(5)	GO:0042692	Details ...	160	-0.182815	-2.67002	0	0.000165	0.019	14673	tags=97%, list=79%, signal=452%	NA
180	INDUCTIVE_CELL_MIGRATION(5)	INDUCTIVE_CELL_MIGRATION(5)	GO:0040039	Details ...	133	-0.200437	-2.66891	0	0.000164	0.019	12683	tags=88%, list=68%, signal=274%	NA
181	REGIONALIZATION(5)	REGIONALIZATION(5)	GO:0003002	Details ...	32	-0.396826	-2.66711	0	0.000163	0.019	10087	tags=94%, list=54%, signal=204%	NA
182	DAUER_LARVAL_DEVELOPMENT(7)	DAUER_LARVAL_DEVELOPMENT(7)	GO:0040024	Details ...	90	-0.238325	-2.66286	0	0.000179	0.021	10280	tags=79%, list=55%, signal=175%	NA
183	EMBRYONIC_BODY_MORPHOGENESIS(5)	EMBRYONIC_BODY_MORPHOGENESIS(5)	GO:0010172	Details ...	46	-0.326444	-2.66148	0	0.000178	0.021	11755	tags=96%, list=63%, signal=259%	NA
184	APOPTOTIC_CELL_CLEARANCE(5)	APOPTOTIC_CELL_CLEARANCE(5)	GO:0043277	Details ...	106	-0.225861	-2.65908	0	0.000177	0.021	12163	tags=88%, list=65%, signal=251%	NA
185	REGULATION_OF_BEHAVIOR(3)	REGULATION_OF_BEHAVIOR(3)	GO:0050795	Details ...	89	-0.238016	-2.6585	0	0.000176	0.021	11916	tags=88%, list=64%, signal=242%	NA
186	ENGULFMENT_OF_APOPTOTIC_CELL(6)	ENGULFMENT_OF_APOPTOTIC_CELL(6)	GO:0043652	Details ...	89	-0.235985	-2.65836	0	0.000175	0.021	12163	tags=89%, list=65%, signal=254%	NA
187	NEGATIVE_REGULATION_OF_GENE_EXPRESSION(5)	NEGATIVE_REGULATION_OF_GENE_EXPRESSION(5)	GO:0010629	Details ...	206	-0.162421	-2.65224	0	0.000191	0.023	13921	tags=91%, list=75%, signal=355%	NA
188	PHOSPHORYLATION(6)	PHOSPHORYLATION(6)	GO:0016310	Details ...	129	-0.201107	-2.65184	0	0.000198	0.024	13178	tags=91%, list=71%, signal=308%	GO:0016310
189	REGULATION_OF_CELL_MOTILITY(4)	REGULATION_OF_CELL_MOTILITY(4)	GO:2000145	Details ...	60	-0.289345	-2.64755	0	0.000197	0.024	11706	tags=92%, list=63%, signal=246%	NA
190	SECRETION(4)	SECRETION(4)	GO:0046903	Details ...	142	-0.193314	-2.64431	0	0.000211	0.025	14533	tags=97%, list=78%, signal=438%	NA
191	SINGLE_ORGANISM_CELLULAR_LOCALIZATION(4)	SINGLE_ORGANISM_CELLULAR_LOCALIZATION(4)	GO:1902580	Details ...	104	-0.220496	-2.63164	0	0.000252	0.029	12218	tags=88%, list=66%, signal=253%	NA
192	PROTEIN_PHOSPHORYLATION(7)	PROTEIN_PHOSPHORYLATION(7)	GO:0006468	Details ...	99	-0.223217	-2.63149	0	0.000251	0.029	13178	tags=93%, list=71%, signal=316%	GO:0006468
193	CELLULAR_MACROMOLECULE_CATABOLIC_PROCESS(5)	CELLULAR_MACROMOLECULE_CATABOLIC_PROCESS(5)	GO:0044265	Details ...	81	-0.248515	-2.61054	0	0.000281	0.033	13102	tags=95%, list=70%, signal=319%	NA
194	BIOLOGICAL_ADHESION(2)&CELL_ADHESION(3)	BIOLOGICAL_ADHESION(2)&CELL_ADHESION(3)	GO:0022610	Details ...	27	-0.418074	-2.57504	0.0021097	0.000337	0.04	8094	tags=85%, list=43%, signal=150%	NA
195	REGULATION_OF_ORGANELLE_ORGANIZATION(4)	REGULATION_OF_ORGANELLE_ORGANIZATION(4)	GO:0033043	Details ...	156	-0.177458	-2.57051	0	0.000343	0.041	11890	tags=81%, list=64%, signal=223%	NA
196	STRIATED_MUSCLE_CELL_DIFFERENTIATION(6)	STRIATED_MUSCLE_CELL_DIFFERENTIATION(6)	GO:0051146	Details ...	147	-0.179901	-2.56771	0	0.000358	0.043	14673	tags=97%, list=79%, signal=451%	NA
197	MALE_MATING_BEHAVIOR(5)	MALE_MATING_BEHAVIOR(5)	GO:0060179	Details ...	25	-0.4322	-2.55566	0	0.000396	0.048	9100	tags=92%, list=49%, signal=180%	NA
198	ESTABLISHMENT_OR_MAINTENANCE_OF_CELL_POLARITY(4)	ESTABLISHMENT_OR_MAINTENANCE_OF_CELL_POLARITY(4)	GO:0007163	Details ...	63	-0.268579	-2.55367	0.00201207	0.000394	0.048	10392	tags=83%, list=56%, signal=186%	NA
199	REGULATION_OF_GENE_EXPRESSION_EPIGENETIC(6)	REGULATION_OF_GENE_EXPRESSION_EPIGENETIC(6)	GO:0040029	Details ...	149	-0.180476	-2.54428	0	0.000407	0.049	13921	tags=93%, list=75%, signal=363%	NA
200	DIGESTIVE_TRACT_MORPHOGENESIS(4)	DIGESTIVE_TRACT_MORPHOGENESIS(4)	GO:0048546	Details ...	18	-0.492822	-2.54356	0	0.000414	0.05	7389	tags=89%, list=40%, signal=147%	NA
201	MUSCLE_CELL_DEVELOPMENT(5)	MUSCLE_CELL_DEVELOPMENT(5)	GO:0055001	Details ...	147	-0.179901	-2.54154	0	0.000412	0.05	14673	tags=97%, list=79%, signal=451%	NA
202	SECRETION_BY_CELL(4)	SECRETION_BY_CELL(4)	GO:0032940	Details ...	134	-0.191536	-2.54135	0.00197628	0.00041	0.05	14533	tags=97%, list=78%, signal=438%	NA
203	WNT_SIGNALING_PATHWAY(6)	WNT_SIGNALING_PATHWAY(6)	GO:0016055	Details ...	29	-0.402172	-2.53969	0	0.000415	0.051	8581	tags=86%, list=46%, signal=160%	NA
204	REGULATION_OF_CATALYTIC_ACTIVITY(4)	REGULATION_OF_CATALYTIC_ACTIVITY(4)	GO:0050790	Details ...	75	-0.250104	-2.53621	0	0.000429	0.053	12749	tags=93%, list=68%, signal=294%	NA
205	ENDODERM_FORMATION(5)&ENDODERMAL_CELL_FATE_COMMITMENT(6)&ENDODERMAL_CELL_DIFFERENTIATION(6)	ENDODERM_FORMATION(5)&ENDODERMAL_CELL_FATE_COMMITMENT(6)&ENDODERMAL_CELL_DIFFERENTIATION(6)	GO:0001706	Details ...	18	-0.504107	-2.53539	0.00189036	0.000427	0.053	8214	tags=94%, list=44%, signal=169%	NA
206	RESPONSE_TO_NUTRIENT_LEVELS(5)	RESPONSE_TO_NUTRIENT_LEVELS(5)	GO:0031667	Details ...	33	-0.38468	-2.52262	0	0.000471	0.059	9784	tags=91%, list=53%, signal=191%	NA
207	MESODERM_FORMATION(5)&MESODERM_MORPHOGENESIS(5)&MESODERMAL_CELL_DIFFERENTIATION(6)	MESODERM_FORMATION(5)&MESODERM_MORPHOGENESIS(5)&MESODERMAL_CELL_DIFFERENTIATION(6)	GO:0001707	Details ...	15	-0.538401	-2.52121	0	0.000476	0.059	6125	tags=87%, list=33%, signal=129%	NA
208	INTRACELLULAR_TRANSPORT(5)	INTRACELLULAR_TRANSPORT(5)	GO:0046907	Details ...	73	-0.250237	-2.51589	0.00425532	0.000473	0.059	12712	tags=93%, list=68%, signal=292%	NA
209	MYOFIBRIL_ASSEMBLY(5)&ACTOMYOSIN_STRUCTURE_ORGANIZATION(6)	MYOFIBRIL_ASSEMBLY(5)&ACTOMYOSIN_STRUCTURE_ORGANIZATION(6)	GO:0030239	Details ...	143	-0.178903	-2.51192	0	0.000486	0.061	14673	tags=97%, list=79%, signal=451%	NA
210	DOSAGE_COMPENSATION(7)	DOSAGE_COMPENSATION(7)	GO:0007549	Details ...	12	-0.606692	-2.51187	0.0019802	0.000484	0.061	7336	tags=100%, list=39%, signal=165%	NA
211	MATING(4)	MATING(4)	GO:0007618	Details ...	33	-0.370415	-2.50455	0	0.000504	0.064	7791	tags=79%, list=42%, signal=135%	NA
212	ENDODERMAL_CELL_FATE_SPECIFICATION(6)	ENDODERMAL_CELL_FATE_SPECIFICATION(6)	GO:0001714	Details ...	17	-0.500809	-2.50398	0	0.000501	0.064	8214	tags=94%, list=44%, signal=168%	NA
213	EXCRETION(5)	EXCRETION(5)	GO:0007588	Details ...	47	-0.307155	-2.50308	0	0.000499	0.064	10149	tags=85%, list=54%, signal=186%	NA
214	SYSTEM_PROCESS(4)	SYSTEM_PROCESS(4)	GO:0003008	Details ...	124	-0.187713	-2.49952	0	0.000519	0.067	12754	tags=87%, list=68%, signal=274%	NA
215	CELL_CELL_SIGNALING(4)	CELL_CELL_SIGNALING(4)	GO:0007267	Details ...	106	-0.207926	-2.49296	0	0.000538	0.07	12671	tags=89%, list=68%, signal=276%	NA
216	MESODERMAL_CELL_FATE_COMMITMENT(6)	MESODERMAL_CELL_FATE_COMMITMENT(6)	GO:0001710	Details ...	14	-0.54733	-2.47411	0	0.000644	0.084	4450	tags=79%, list=24%, signal=103%	NA
217	NEURON_MIGRATION(5)	NEURON_MIGRATION(5)	GO:0001764	Details ...	26	-0.400314	-2.4666	0	0.000713	0.094	9751	tags=92%, list=52%, signal=193%	NA
218	POSITIVE_REGULATION_OF_VULVAL_DEVELOPMENT(4)	POSITIVE_REGULATION_OF_VULVAL_DEVELOPMENT(4)	GO:0040026	Details ...	50	-0.298123	-2.46361	0	0.000717	0.095	9739	tags=82%, list=52%, signal=171%	NA
219	CELLULAR_MACROMOLECULE_LOCALIZATION(4)&CELLULAR_PROTEIN_LOCALIZATION(5)	CELLULAR_MACROMOLECULE_LOCALIZATION(4)&CELLULAR_PROTEIN_LOCALIZATION(5)	GO:0070727	Details ...	71	-0.246256	-2.46104	0	0.000727	0.097	11175	tags=85%, list=60%, signal=210%	NA
220	REGULATION_OF_SMALL_GTPASE_MEDIATED_SIGNAL_TRANSDUCTION(6)&REGULATION_OF_RAS_PROTEIN_SIGNAL_TRANSDUCTION(7)	REGULATION_OF_SMALL_GTPASE_MEDIATED_SIGNAL_TRANSDUCTION(6)&REGULATION_OF_RAS_PROTEIN_SIGNAL_TRANSDUCTION(7)	GO:0051056	Details ...	35	-0.349789	-2.45088	0	0.000781	0.105	11595	tags=97%, list=62%, signal=257%	NA
221	ANTERIOR_POSTERIOR_PATTERN_SPECIFICATION(6)	ANTERIOR_POSTERIOR_PATTERN_SPECIFICATION(6)	GO:0009952	Details ...	28	-0.387798	-2.44916	0.002079	0.000792	0.107	10087	tags=93%, list=54%, signal=202%	NA
222	STRIATED_MUSCLE_CELL_DEVELOPMENT(6)	STRIATED_MUSCLE_CELL_DEVELOPMENT(6)	GO:0055002	Details ...	146	-0.179657	-2.44889	0	0.000803	0.109	14673	tags=97%, list=79%, signal=451%	NA
223	NEGATIVE_REGULATION_OF_CELLULAR_COMPONENT_ORGANIZATION(3)	NEGATIVE_REGULATION_OF_CELLULAR_COMPONENT_ORGANIZATION(3)	GO:0051129	Details ...	34	-0.352696	-2.44888	0	0.000799	0.109	10429	tags=91%, list=56%, signal=207%	NA
224	ESTABLISHMENT_OF_SPINDLE_LOCALIZATION(4)&SPINDLE_LOCALIZATION(5)	ESTABLISHMENT_OF_SPINDLE_LOCALIZATION(4)&SPINDLE_LOCALIZATION(5)	GO:0051293	Details ...	51	-0.289101	-2.44634	0	0.000838	0.115	10338	tags=84%, list=55%, signal=189%	NA
225	SINGLE_ORGANISM_INTRACELLULAR_TRANSPORT(4)	SINGLE_ORGANISM_INTRACELLULAR_TRANSPORT(4)	GO:1902582	Details ...	67	-0.244001	-2.43928	0	0.000882	0.122	12712	tags=93%, list=68%, signal=290%	NA
226	POSITIVE_REGULATION_OF_POST_EMBRYONIC_DEVELOPMENT(4)&POSITIVE_REGULATION_OF_NEMATODE_LARVAL_DEVELOPMENT(5)	POSITIVE_REGULATION_OF_POST_EMBRYONIC_DEVELOPMENT(4)&POSITIVE_REGULATION_OF_NEMATODE_LARVAL_DEVELOPMENT(5)	GO:0048582	Details ...	52	-0.291619	-2.43896	0	0.000878	0.122	10706	tags=87%, list=57%, signal=203%	NA
227	NEGATIVE_REGULATION_OF_SIGNAL_TRANSDUCTION(4)	NEGATIVE_REGULATION_OF_SIGNAL_TRANSDUCTION(4)	GO:0009968	Details ...	58	-0.265461	-2.43621	0	0.000881	0.123	8562	tags=72%, list=46%, signal=134%	NA
228	NEGATIVE_REGULATION_OF_CELLULAR_METABOLIC_PROCESS(4)	NEGATIVE_REGULATION_OF_CELLULAR_METABOLIC_PROCESS(4)	GO:0031324	Details ...	106	-0.204729	-2.43389	0	0.000891	0.125	9918	tags=74%, list=53%, signal=156%	NA
229	POSITIVE_REGULATION_OF_MOLECULAR_FUNCTION(4)	POSITIVE_REGULATION_OF_MOLECULAR_FUNCTION(4)	GO:0044093	Details ...	47	-0.299408	-2.42913	0	0.0009	0.127	12275	tags=96%, list=66%, signal=280%	NA
230	NEGATIVE_REGULATION_OF_SIGNALING(3)&NEGATIVE_REGULATION_OF_CELL_COMMUNICATION(4)	NEGATIVE_REGULATION_OF_SIGNALING(3)&NEGATIVE_REGULATION_OF_CELL_COMMUNICATION(4)	GO:0023057	Details ...	59	-0.270166	-2.42483	0	0.000923	0.131	8562	tags=73%, list=46%, signal=134%	NA
231	POSITIVE_REGULATION_OF_RESPONSE_TO_STIMULUS(3)	POSITIVE_REGULATION_OF_RESPONSE_TO_STIMULUS(3)	GO:0048584	Details ...	52	-0.283391	-2.41661	0	0.000959	0.134	9784	tags=81%, list=53%, signal=170%	NA
232	ASYMMETRIC_PROTEIN_LOCALIZATION(5)	ASYMMETRIC_PROTEIN_LOCALIZATION(5)	GO:0008105	Details ...	35	-0.339915	-2.40532	0	0.00102295	0.143	10714	tags=91%, list=58%, signal=215%	NA
233	DEFECATION(6)	DEFECATION(6)	GO:0030421	Details ...	45	-0.300487	-2.39344	0	0.00110721	0.155	10149	tags=84%, list=54%, signal=185%	NA
234	POSITIVE_REGULATION_OF_CATALYTIC_ACTIVITY(4)	POSITIVE_REGULATION_OF_CATALYTIC_ACTIVITY(4)	GO:0043085	Details ...	45	-0.29748	-2.39046	0	0.00112907	0.157	12275	tags=96%, list=66%, signal=279%	NA
235	REGULATION_OF_INTRACELLULAR_SIGNAL_TRANSDUCTION(5)	REGULATION_OF_INTRACELLULAR_SIGNAL_TRANSDUCTION(5)	GO:1902531	Details ...	69	-0.244205	-2.38466	0	0.00120533	0.167	12749	tags=93%, list=68%, signal=293%	NA
236	REGULATION_OF_SECRETION(5)	REGULATION_OF_SECRETION(5)	GO:0051046	Details ...	29	-0.370856	-2.38309	0	0.00122034	0.169	9806	tags=90%, list=53%, signal=189%	NA
237	MATING_BEHAVIOR(5)	MATING_BEHAVIOR(5)	GO:0007617	Details ...	31	-0.356667	-2.38064	0	0.00123503	0.17	7791	tags=77%, list=42%, signal=133%	NA
238	TUBE_MORPHOGENESIS(4)	TUBE_MORPHOGENESIS(4)	GO:0035239	Details ...	20	-0.453944	-2.37538	0	0.00124959	0.173	7389	tags=85%, list=40%, signal=141%	NA
239	REGULATION_OF_NERVOUS_SYSTEM_DEVELOPMENT(5)	REGULATION_OF_NERVOUS_SYSTEM_DEVELOPMENT(5)	GO:0051960	Details ...	35	-0.33445	-2.36397	0	0.00133334	0.185	9751	tags=86%, list=52%, signal=179%	NA
240	POSITIVE_REGULATION_OF_LOCOMOTION(3)	POSITIVE_REGULATION_OF_LOCOMOTION(3)	GO:0040017	Details ...	41	-0.300117	-2.35286	0	0.00148357	0.204	12144	tags=95%, list=65%, signal=273%	NA
241	ESTABLISHMENT_OF_CELL_POLARITY(5)	ESTABLISHMENT_OF_CELL_POLARITY(5)	GO:0030010	Details ...	46	-0.290818	-2.34592	0	0.00156197	0.214	10392	tags=85%, list=56%, signal=191%	NA
242	SYNAPSE_ORGANIZATION(4)	SYNAPSE_ORGANIZATION(4)	GO:0050808	Details ...	25	-0.393826	-2.3364	0	0.00165265	0.226	9814	tags=92%, list=53%, signal=194%	NA
243	DOSAGE_COMPENSATION_BY_HYPOACTIVATION_OF_X_CHROMOSOME(8)	DOSAGE_COMPENSATION_BY_HYPOACTIVATION_OF_X_CHROMOSOME(8)	GO:0042464	Details ...	10	-0.606627	-2.31958	0	0.00185677	0.253	7336	tags=100%, list=39%, signal=165%	NA
244	REGULATION_OF_NEUROGENESIS(6)&REGULATION_OF_NEURON_DIFFERENTIATION(7)	REGULATION_OF_NEUROGENESIS(6)&REGULATION_OF_NEURON_DIFFERENTIATION(7)	GO:0050767	Details ...	34	-0.330222	-2.30899	0.00194175	0.00195087	0.263	9751	tags=85%, list=52%, signal=179%	NA
245	MESODERMAL_CELL_FATE_SPECIFICATION(6)	MESODERMAL_CELL_FATE_SPECIFICATION(6)	GO:0007501	Details ...	13	-0.530806	-2.3086	0	0.00194291	0.263	4450	tags=77%, list=24%, signal=101%	NA
246	INORGANIC_ANION_TRANSPORT(6)	INORGANIC_ANION_TRANSPORT(6)	GO:0015698	Details ...	30	-0.34551	-2.29704	0.00400802	0.00211328	0.286	9100	tags=83%, list=49%, signal=163%	NA
247	ESTABLISHMENT_OF_SPINDLE_ORIENTATION(5)	ESTABLISHMENT_OF_SPINDLE_ORIENTATION(5)	GO:0051294	Details ...	34	-0.328124	-2.29369	0	0.00212953	0.29	10338	tags=88%, list=55%, signal=198%	NA
248	REGULATION_OF_PROTEIN_LOCALIZATION(4)	REGULATION_OF_PROTEIN_LOCALIZATION(4)	GO:0032880	Details ...	50	-0.281229	-2.29153	0	0.00215258	0.293	11916	tags=92%, list=64%, signal=255%	NA
249	REGULATION_OF_ASYMMETRIC_CELL_DIVISION(5)	REGULATION_OF_ASYMMETRIC_CELL_DIVISION(5)	GO:0009786	Details ...	13	-0.525567	-2.27942	0.00424628	0.00231976	0.314	8847	tags=100%, list=47%, signal=190%	NA
250	REGULATION_OF_ANATOMICAL_STRUCTURE_SIZE(4)	REGULATION_OF_ANATOMICAL_STRUCTURE_SIZE(4)	GO:0090066	Details ...	48	-0.273644	-2.27124	0	0.00244872	0.327	11218	tags=88%, list=60%, signal=219%	NA
251	ESTABLISHMENT_OF_MITOTIC_SPINDLE_LOCALIZATION(5)	ESTABLISHMENT_OF_MITOTIC_SPINDLE_LOCALIZATION(5)	GO:0040001	Details ...	41	-0.29949	-2.26912	0	0.00247023	0.33	10338	tags=85%, list=55%, signal=191%	NA
252	POSITIVE_REGULATION_OF_CELL_DEATH(4)	POSITIVE_REGULATION_OF_CELL_DEATH(4)	GO:0010942	Details ...	34	-0.325592	-2.2596	0	0.00265247	0.346	12029	tags=97%, list=65%, signal=273%	NA
253	CHROMATIN_ORGANIZATION(4)&CHROMATIN_MODIFICATION(5)	CHROMATIN_ORGANIZATION(4)&CHROMATIN_MODIFICATION(5)	GO:0006325	Details ...	39	-0.309571	-2.25886	0	0.00265454	0.348	8577	tags=77%, list=46%, signal=142%	NA
254	AMEBOIDAL_TYPE_CELL_MIGRATION(5)	AMEBOIDAL_TYPE_CELL_MIGRATION(5)	GO:0001667	Details ...	23	-0.398431	-2.25194	0.00394477	0.00277852	0.366	11218	tags=100%, list=60%, signal=251%	NA
255	AUTOPHAGY(5)	AUTOPHAGY(5)	GO:0006914	Details ...	28	-0.357245	-2.23282	0.00207469	0.00317621	0.406	9990	tags=89%, list=54%, signal=192%	NA
256	ORGANISM_EMERGENCE_FROM_PROTECTIVE_STRUCTURE(4)&HATCHING(5)	ORGANISM_EMERGENCE_FROM_PROTECTIVE_STRUCTURE(4)&HATCHING(5)	GO:0071684	Details ...	46	-0.281302	-2.23112	0.00207039	0.00321187	0.41	13404	tags=100%, list=72%, signal=356%	NA
257	REGULATION_OF_VESICLE_MEDIATED_TRANSPORT(4)	REGULATION_OF_VESICLE_MEDIATED_TRANSPORT(4)	GO:0060627	Details ...	28	-0.347966	-2.22707	0.00201207	0.00329215	0.418	10828	tags=93%, list=58%, signal=221%	NA
258	STRIATED_MUSCLE_MYOSIN_THICK_FILAMENT_ASSEMBLY(5)&MYOSIN_FILAMENT_ORGANIZATION(6)&MYOSIN_FILAMENT_ASSEMBLY(7)	STRIATED_MUSCLE_MYOSIN_THICK_FILAMENT_ASSEMBLY(5)&MYOSIN_FILAMENT_ORGANIZATION(6)&MYOSIN_FILAMENT_ASSEMBLY(7)	GO:0071688	Details ...	127	-0.174313	-2.22001	0.00203666	0.00345033	0.436	14673	tags=96%, list=79%, signal=449%	NA
259	PHARYNX_DEVELOPMENT(4)	PHARYNX_DEVELOPMENT(4)	GO:0060465	Details ...	40	-0.292741	-2.21538	0.00382409	0.00354508	0.442	10395	tags=85%, list=56%, signal=192%	NA
260	DEFENSE_RESPONSE(4)	DEFENSE_RESPONSE(4)	GO:0006952	Details ...	229	-0.125649	-2.20744	0	0.00370967	0.461	8184	tags=56%, list=44%, signal=99%	GO:0006952
261	SYNAPTIC_TRANSMISSION(3)	SYNAPTIC_TRANSMISSION(3)	GO:0007268	Details ...	86	-0.204616	-2.20447	0.00399202	0.00376843	0.469	12671	tags=88%, list=68%, signal=275%	NA
262	ORGANIC_CYCLIC_COMPOUND_CATABOLIC_PROCESS(5)	ORGANIC_CYCLIC_COMPOUND_CATABOLIC_PROCESS(5)	GO:1901361	Details ...	54	-0.252352	-2.19834	0.002	0.00391492	0.482	12909	tags=94%, list=69%, signal=307%	NA
263	TURNING_BEHAVIOR(4)&TURNING_BEHAVIOR_INVOLVED_IN_MATING(5)	TURNING_BEHAVIOR(4)&TURNING_BEHAVIOR_INVOLVED_IN_MATING(5)	GO:0035178	Details ...	12	-0.511167	-2.18973	0	0.00409563	0.494	7562	tags=92%, list=41%, signal=154%	NA
264	DORMANCY_PROCESS(3)	DORMANCY_PROCESS(3)	GO:0022611	Details ...	30	-0.334871	-2.18838	0	0.00411627	0.496	11161	tags=93%, list=60%, signal=232%	NA
265	SINGLE_ORGANISM_BEHAVIOR(3)	SINGLE_ORGANISM_BEHAVIOR(3)	GO:0044708	Details ...	77	-0.209043	-2.18123	0	0.00431856	0.513	11124	tags=81%, list=60%, signal=199%	NA
266	POSITIVE_REGULATION_OF_PROTEIN_METABOLIC_PROCESS(5)	POSITIVE_REGULATION_OF_PROTEIN_METABOLIC_PROCESS(5)	GO:0051247	Details ...	43	-0.283175	-2.17694	0.00218341	0.00440682	0.518	8169	tags=72%, list=44%, signal=128%	NA
267	LOCOMOTORY_BEHAVIOR(3)	LOCOMOTORY_BEHAVIOR(3)	GO:0007626	Details ...	36	-0.306319	-2.17245	0.0041841	0.00447771	0.521	12936	tags=100%, list=69%, signal=327%	NA
268	REGULATION_OF_SECRETION_BY_CELL(5)	REGULATION_OF_SECRETION_BY_CELL(5)	GO:1903530	Details ...	22	-0.38327	-2.16542	0.0019305	0.00463927	0.531	9806	tags=91%, list=53%, signal=192%	NA
269	EPITHELIUM_DEVELOPMENT(5)	EPITHELIUM_DEVELOPMENT(5)	GO:0060429	Details ...	68	-0.228362	-2.1654	0.002	0.00462203	0.531	12749	tags=91%, list=68%, signal=288%	NA
270	REGULATION_OF_CELL_DIVISION(4)	REGULATION_OF_CELL_DIVISION(4)	GO:0051302	Details ...	133	-0.161915	-2.16007	0.00877193	0.00478344	0.545	12415	tags=83%, list=67%, signal=246%	NA
271	ORGANIC_SUBSTANCE_TRANSPORT(5)	ORGANIC_SUBSTANCE_TRANSPORT(5)	GO:0071702	Details ...	116	-0.172481	-2.15546	0	0.00493442	0.561	13993	tags=92%, list=75%, signal=368%	NA
272	PEPTIDYL_AMINO_ACID_MODIFICATION(7)	PEPTIDYL_AMINO_ACID_MODIFICATION(7)	GO:0018193	Details ...	68	-0.223898	-2.15042	0.00204082	0.00511904	0.577	10366	tags=78%, list=56%, signal=175%	GO:0018193
273	SMALL_MOLECULE_METABOLIC_PROCESS(4)	SMALL_MOLECULE_METABOLIC_PROCESS(4)	GO:0044281	Details ...	140	-0.15662	-2.14014	0	0.00550202	0.604	14139	tags=91%, list=76%, signal=376%	NA
274	CELLULAR_PROTEIN_CATABOLIC_PROCESS(6)	CELLULAR_PROTEIN_CATABOLIC_PROCESS(6)	GO:0044257	Details ...	42	-0.276659	-2.13961	0.00412371	0.00551077	0.605	12602	tags=95%, list=68%, signal=294%	NA
275	REGULATION_OF_CELL_DEVELOPMENT(5)	REGULATION_OF_CELL_DEVELOPMENT(5)	GO:0060284	Details ...	43	-0.267995	-2.12942	0.00200803	0.00587078	0.625	9751	tags=79%, list=52%, signal=166%	NA
276	REGULATION_OF_CELLULAR_LOCALIZATION(4)	REGULATION_OF_CELLULAR_LOCALIZATION(4)	GO:0060341	Details ...	40	-0.283776	-2.1264	0	0.00593332	0.63	11959	tags=93%, list=64%, signal=258%	NA
277	REGULATION_OF_CELLULAR_COMPONENT_SIZE(4)	REGULATION_OF_CELLULAR_COMPONENT_SIZE(4)	GO:0032535	Details ...	42	-0.279521	-2.11764	0.00406504	0.00619208	0.649	11218	tags=88%, list=60%, signal=221%	NA
278	MITOTIC_NUCLEAR_DIVISION(5)	MITOTIC_NUCLEAR_DIVISION(5)	GO:0007067	Details ...	94	-0.184895	-2.11622	0.00390625	0.00623759	0.651	14610	tags=97%, list=78%, signal=446%	NA
279	CELLULAR_NITROGEN_COMPOUND_CATABOLIC_PROCESS(5)&HETEROCYCLE_CATABOLIC_PROCESS(5)	CELLULAR_NITROGEN_COMPOUND_CATABOLIC_PROCESS(5)&HETEROCYCLE_CATABOLIC_PROCESS(5)	GO:0044270	Details ...	53	-0.251287	-2.11482	0.00390625	0.00627641	0.654	12909	tags=94%, list=69%, signal=306%	NA
280	REGULATION_OF_NEUROTRANSMITTER_LEVELS(4)	REGULATION_OF_NEUROTRANSMITTER_LEVELS(4)	GO:0001505	Details ...	42	-0.273453	-2.11077	0.00387597	0.00639206	0.665	12218	tags=93%, list=66%, signal=269%	NA
281	MESODERMAL_CELL_MIGRATION(6)	MESODERMAL_CELL_MIGRATION(6)	GO:0008078	Details ...	10	-0.53966	-2.10963	0.004	0.00643536	0.667	8583	tags=100%, list=46%, signal=185%	NA
282	MRNA_METABOLIC_PROCESS(6)	MRNA_METABOLIC_PROCESS(6)	GO:0016071	Details ...	48	-0.255648	-2.09759	0.00630252	0.00686464	0.693	13105	tags=96%, list=70%, signal=322%	NA
283	REGULATION_OF_HYDROLASE_ACTIVITY(5)	REGULATION_OF_HYDROLASE_ACTIVITY(5)	GO:0051336	Details ...	31	-0.31371	-2.09463	0.00198807	0.00695626	0.699	11595	tags=94%, list=62%, signal=247%	NA
284	ORGANOPHOSPHATE_METABOLIC_PROCESS(4)	ORGANOPHOSPHATE_METABOLIC_PROCESS(4)	GO:0019637	Details ...	79	-0.204048	-2.09407	0.00610998	0.00695916	0.7	14139	tags=96%, list=76%, signal=397%	NA
285	REGULATION_OF_ENDOCYTOSIS(4)	REGULATION_OF_ENDOCYTOSIS(4)	GO:0030100	Details ...	25	-0.347684	-2.08792	0.0019305	0.00715942	0.711	12163	tags=100%, list=65%, signal=288%	NA
286	PROTEIN_MODIFICATION_BY_SMALL_PROTEIN_CONJUGATION_OR_REMOVAL(7)	PROTEIN_MODIFICATION_BY_SMALL_PROTEIN_CONJUGATION_OR_REMOVAL(7)	GO:0070647	Details ...	42	-0.271096	-2.08708	0.00571429	0.00716239	0.712	13149	tags=98%, list=71%, signal=331%	NA
287	REGULATION_OF_CELL_SIZE(5)	REGULATION_OF_CELL_SIZE(5)	GO:0008361	Details ...	30	-0.310512	-2.07929	0	0.0075297	0.729	9751	tags=83%, list=52%, signal=175%	NA
288	REGULATION_OF_CYTOSKELETON_ORGANIZATION(5)	REGULATION_OF_CYTOSKELETON_ORGANIZATION(5)	GO:0051493	Details ...	40	-0.287487	-2.07812	0	0.00756957	0.733	11890	tags=93%, list=64%, signal=255%	NA
289	TISSUE_MORPHOGENESIS(4)	TISSUE_MORPHOGENESIS(4)	GO:0048729	Details ...	56	-0.232893	-2.07567	0.00195312	0.00767828	0.74	6654	tags=59%, list=36%, signal=91%	NA
290	POSITIVE_REGULATION_OF_SECRETION(4)	POSITIVE_REGULATION_OF_SECRETION(4)	GO:0051047	Details ...	17	-0.415282	-2.07459	0	0.00769558	0.742	9806	tags=94%, list=53%, signal=199%	NA
291	AROMATIC_COMPOUND_CATABOLIC_PROCESS(5)	AROMATIC_COMPOUND_CATABOLIC_PROCESS(5)	GO:0019439	Details ...	51	-0.249034	-2.07167	0.00397614	0.00778699	0.745	12909	tags=94%, list=69%, signal=306%	NA
292	RESPONSE_TO_STARVATION(4)	RESPONSE_TO_STARVATION(4)	GO:0042594	Details ...	25	-0.355384	-2.06895	0.0059761	0.00786332	0.747	9784	tags=88%, list=53%, signal=185%	NA
293	NEUROTRANSMITTER_TRANSPORT(4)	NEUROTRANSMITTER_TRANSPORT(4)	GO:0006836	Details ...	36	-0.289268	-2.0621	0.00580271	0.00817578	0.762	12218	tags=94%, list=66%, signal=274%	NA
294	REGULATION_OF_REPRODUCTIVE_PROCESS(3)	REGULATION_OF_REPRODUCTIVE_PROCESS(3)	GO:2000241	Details ...	63	-0.214563	-2.06179	0.00196078	0.00815315	0.762	14648	tags=100%, list=79%, signal=466%	NA
295	MODIFICATION_DEPENDENT_MACROMOLECULE_CATABOLIC_PROCESS(6)&PROTEOLYSIS_INVOLVED_IN_CELLULAR_PROTEIN_CATABOLIC_PROCESS(6)&MODIFICATION_DEPENDENT_PROTEIN_CATABOLIC_PROCESS(7)&UBIQUITIN_DEPENDENT_PROTEIN_CATABOLIC_PROCESS(8)	MODIFICATION_DEPENDENT_MACROMOLECULE_CATABOLIC_PROCESS(6)&PROTEOLYSIS_INVOLVED_IN_CELLULAR_PROTEIN_CATABOLIC_PROCESS(6)&MODIFICATION_DEPENDENT_PROTEIN_CATABOLIC_PROCESS(7)&UBIQUITIN_DEPENDENT_PROTEIN_CATABOLIC_PROCESS(8)	GO:0043632	Details ...	36	-0.296449	-2.05845	0.00206612	0.00835562	0.769	12602	tags=97%, list=68%, signal=300%	NA
296	GONAD_MORPHOGENESIS(4)	GONAD_MORPHOGENESIS(4)	GO:0035262	Details ...	26	-0.339193	-2.05784	0.00206612	0.00834346	0.77	9455	tags=85%, list=51%, signal=172%	NA
297	CARBOHYDRATE_DERIVATIVE_METABOLIC_PROCESS(4)	CARBOHYDRATE_DERIVATIVE_METABOLIC_PROCESS(4)	GO:1901135	Details ...	86	-0.191949	-2.05592	0.00383877	0.00840348	0.774	12256	tags=85%, list=66%, signal=247%	NA
298	REGULATION_OF_CELL_DEATH(4)	REGULATION_OF_CELL_DEATH(4)	GO:0010941	Details ...	61	-0.223419	-2.05586	0.0039604	0.00838076	0.774	10818	tags=80%, list=58%, signal=191%	NA
299	CELL_GROWTH(3)	CELL_GROWTH(3)	GO:0016049	Details ...	40	-0.273138	-2.05358	0.00201207	0.00848779	0.781	11691	tags=90%, list=63%, signal=241%	NA
300	DEPHOSPHORYLATION(6)	DEPHOSPHORYLATION(6)	GO:0016311	Details ...	25	-0.349163	-2.05209	0.00393701	0.00852228	0.782	10645	tags=92%, list=57%, signal=214%	GO:0016311
301	POSITIVE_REGULATION_OF_TRANSPORT(3)	POSITIVE_REGULATION_OF_TRANSPORT(3)	GO:0051050	Details ...	30	-0.317234	-2.04516	0.00409836	0.00883687	0.798	10247	tags=87%, list=55%, signal=192%	NA
302	POSITIVE_REGULATION_OF_CELL_COMMUNICATION(4)	POSITIVE_REGULATION_OF_CELL_COMMUNICATION(4)	GO:0010647	Details ...	67	-0.212013	-2.04421	0.00412371	0.00885913	0.798	10247	tags=76%, list=55%, signal=169%	NA
303	PROTEOLYSIS(5)	PROTEOLYSIS(5)	GO:0006508	Details ...	59	-0.222664	-2.03952	0.00402414	0.00906235	0.804	12602	tags=90%, list=68%, signal=277%	NA
304	REGULATION_OF_MULTI_ORGANISM_PROCESS(3)	REGULATION_OF_MULTI_ORGANISM_PROCESS(3)	GO:0043900	Details ...	65	-0.214586	-2.03225	0.00201613	0.00948227	0.818	14648	tags=100%, list=79%, signal=466%	NA
305	HISTONE_MODIFICATION(4)&COVALENT_CHROMATIN_MODIFICATION(6)	HISTONE_MODIFICATION(4)&COVALENT_CHROMATIN_MODIFICATION(6)	GO:0016570	Details ...	36	-0.290253	-2.0282	0.00408163	0.00971716	0.826	8577	tags=75%, list=46%, signal=139%	NA
306	CELL_PROJECTION_ASSEMBLY(5)	CELL_PROJECTION_ASSEMBLY(5)	GO:0030031	Details ...	31	-0.303817	-2.02616	0.00613497	0.00977592	0.828	12380	tags=97%, list=66%, signal=288%	NA
307	POSITIVE_REGULATION_OF_SIGNALING(3)	POSITIVE_REGULATION_OF_SIGNALING(3)	GO:0023056	Details ...	64	-0.216927	-2.02496	0.004158	0.00981571	0.83	11111	tags=81%, list=60%, signal=201%	NA
308	MUSCLE_ORGAN_DEVELOPMENT(5)	MUSCLE_ORGAN_DEVELOPMENT(5)	GO:0007517	Details ...	26	-0.331117	-2.01632	0.00938086	0.0103586	0.851	11755	tags=96%, list=63%, signal=260%	NA
309	SIGNAL_RELEASE(5)	SIGNAL_RELEASE(5)	GO:0023061	Details ...	35	-0.287662	-2.01597	0.00191205	0.0103615	0.853	12218	tags=94%, list=66%, signal=273%	NA
310	SYNAPTIC_TRANSMISSION_CHOLINERGIC(4)	SYNAPTIC_TRANSMISSION_CHOLINERGIC(4)	GO:0007271	Details ...	30	-0.302075	-2.00595	0.00984252	0.011043	0.876	11150	tags=90%, list=60%, signal=224%	NA
311	NUCLEOBASE_CONTAINING_COMPOUND_CATABOLIC_PROCESS(5)	NUCLEOBASE_CONTAINING_COMPOUND_CATABOLIC_PROCESS(5)	GO:0034655	Details ...	49	-0.2466	-1.99671	0.00197628	0.0117201	0.893	12909	tags=94%, list=69%, signal=305%	NA
312	REGULATION_OF_ACTIN_CYTOSKELETON_ORGANIZATION(5)	REGULATION_OF_ACTIN_CYTOSKELETON_ORGANIZATION(5)	GO:0032956	Details ...	17	-0.398302	-1.99517	0.00379507	0.011788	0.896	11218	tags=100%, list=60%, signal=251%	NA
313	CHROMOSOME_ORGANIZATION(4)	CHROMOSOME_ORGANIZATION(4)	GO:0051276	Details ...	118	-0.156082	-1.98554	0.00601202	0.0124723	0.915	14953	tags=96%, list=80%, signal=482%	NA
314	REGULATION_OF_ACTIN_FILAMENT_BASED_PROCESS(4)	REGULATION_OF_ACTIN_FILAMENT_BASED_PROCESS(4)	GO:0032970	Details ...	22	-0.352901	-1.97776	0.00760456	0.012921	0.922	11218	tags=95%, list=60%, signal=240%	NA
315	SINGLE_ORGANISM_CATABOLIC_PROCESS(4)	SINGLE_ORGANISM_CATABOLIC_PROCESS(4)	GO:0044712	Details ...	67	-0.203422	-1.97689	0.00420168	0.0129576	0.924	12353	tags=87%, list=66%, signal=256%	NA
316	REGULATION_OF_PROTEIN_MODIFICATION_PROCESS(6)	REGULATION_OF_PROTEIN_MODIFICATION_PROCESS(6)	GO:0031399	Details ...	55	-0.220662	-1.97514	0.00391389	0.0130503	0.926	13178	tags=93%, list=71%, signal=316%	NA
317	PROTEIN_MODIFICATION_BY_SMALL_PROTEIN_CONJUGATION(8)	PROTEIN_MODIFICATION_BY_SMALL_PROTEIN_CONJUGATION(8)	GO:0032446	Details ...	33	-0.286505	-1.97089	0.00194932	0.0133405	0.935	12739	tags=97%, list=68%, signal=306%	NA
318	NEUROPEPTIDE_SIGNALING_PATHWAY(7)	NEUROPEPTIDE_SIGNALING_PATHWAY(7)	GO:0007218	Details ...	12	-0.463151	-1.97002	0.00649351	0.0133328	0.935	8456	tags=92%, list=45%, signal=168%	NA
319	PURINE_CONTAINING_COMPOUND_METABOLIC_PROCESS(5)	PURINE_CONTAINING_COMPOUND_METABOLIC_PROCESS(5)	GO:0072521	Details ...	32	-0.293917	-1.95555	0	0.0144936	0.953	12001	tags=94%, list=64%, signal=263%	NA
320	FEEDING_BEHAVIOR(3)	FEEDING_BEHAVIOR(3)	GO:0007631	Details ...	68	-0.201159	-1.94999	0.0102669	0.0148837	0.955	12706	tags=88%, list=68%, signal=276%	NA
321	AMMONIUM_TRANSPORT(6)	AMMONIUM_TRANSPORT(6)	GO:0015696	Details ...	20	-0.362009	-1.94987	0.00211416	0.0148518	0.956	9100	tags=85%, list=49%, signal=166%	NA
322	DEVELOPMENTAL_CELL_GROWTH(4)	DEVELOPMENTAL_CELL_GROWTH(4)	GO:0048588	Details ...	34	-0.284836	-1.94604	0.00401606	0.0151354	0.959	11691	tags=91%, list=63%, signal=244%	NA
323	ESTABLISHMENT_OF_PROTEIN_LOCALIZATION(4)	ESTABLISHMENT_OF_PROTEIN_LOCALIZATION(4)	GO:0045184	Details ...	54	-0.221509	-1.94473	0.00399202	0.015205	0.96	14172	tags=98%, list=76%, signal=409%	NA
324	POSITIVE_REGULATION_OF_CELLULAR_PROTEIN_METABOLIC_PROCESS(5)	POSITIVE_REGULATION_OF_CELLULAR_PROTEIN_METABOLIC_PROCESS(5)	GO:0032270	Details ...	40	-0.262154	-1.9411	0.00588235	0.0154368	0.962	8169	tags=70%, list=44%, signal=124%	NA
325	CILIUM_ORGANIZATION(5)	CILIUM_ORGANIZATION(5)	GO:0044782	Details ...	29	-0.301556	-1.93939	0.0136986	0.0155471	0.963	12380	tags=97%, list=66%, signal=287%	NA
326	REGULATION_OF_CELL_PROJECTION_ORGANIZATION(4)	REGULATION_OF_CELL_PROJECTION_ORGANIZATION(4)	GO:0031344	Details ...	32	-0.289676	-1.93815	0.0104167	0.0156252	0.964	9751	tags=81%, list=52%, signal=170%	NA
327	RNA_SPLICING(7)	RNA_SPLICING(7)	GO:0008380	Details ...	21	-0.34561	-1.93757	0.00831601	0.0156494	0.965	11313	tags=95%, list=61%, signal=242%	NA
328	CELL_FATE_DETERMINATION(5)	CELL_FATE_DETERMINATION(5)	GO:0001709	Details ...	27	-0.314335	-1.93299	0.011976	0.0160224	0.966	10714	tags=89%, list=58%, signal=209%	NA
329	PURINE_NUCLEOTIDE_METABOLIC_PROCESS(6)&PURINE_RIBONUCLEOTIDE_METABOLIC_PROCESS(7)	PURINE_NUCLEOTIDE_METABOLIC_PROCESS(6)&PURINE_RIBONUCLEOTIDE_METABOLIC_PROCESS(7)	GO:0006163	Details ...	31	-0.291882	-1.92974	0.0037594	0.0163021	0.968	12001	tags=94%, list=64%, signal=262%	NA
330	MITOTIC_SISTER_CHROMATID_SEGREGATION(6)	MITOTIC_SISTER_CHROMATID_SEGREGATION(6)	GO:0000070	Details ...	44	-0.244847	-1.92948	0.0116505	0.0162859	0.968	11117	tags=84%, list=60%, signal=208%	NA
331	POSITIVE_REGULATION_OF_APOPTOTIC_PROCESS(6)	POSITIVE_REGULATION_OF_APOPTOTIC_PROCESS(6)	GO:0043065	Details ...	15	-0.403087	-1.92618	0.0141129	0.0165443	0.971	8644	tags=87%, list=46%, signal=162%	NA
332	ORGANONITROGEN_COMPOUND_METABOLIC_PROCESS(4)	ORGANONITROGEN_COMPOUND_METABOLIC_PROCESS(4)	GO:1901564	Details ...	100	-0.166407	-1.91954	0.0114943	0.0170605	0.972	15362	tags=99%, list=82%, signal=561%	NA
333	PROTEIN_DEPHOSPHORYLATION(7)	PROTEIN_DEPHOSPHORYLATION(7)	GO:0006470	Details ...	16	-0.392701	-1.91573	0.00795229	0.0173823	0.977	8993	tags=88%, list=48%, signal=169%	GO:0006470
334	ESTABLISHMENT_OF_MITOTIC_SPINDLE_ORIENTATION(6)	ESTABLISHMENT_OF_MITOTIC_SPINDLE_ORIENTATION(6)	GO:0000132	Details ...	28	-0.30277	-1.91435	0.00773694	0.0174432	0.978	10338	tags=86%, list=55%, signal=192%	NA
335	ENDOSOMAL_TRANSPORT(5)	ENDOSOMAL_TRANSPORT(5)	GO:0016197	Details ...	20	-0.363196	-1.91192	0.0123203	0.017647	0.979	10941	tags=95%, list=59%, signal=230%	NA
336	EATING_BEHAVIOR(4)	EATING_BEHAVIOR(4)	GO:0042755	Details ...	56	-0.215958	-1.90829	0	0.0178986	0.98	11959	tags=86%, list=64%, signal=239%	NA
337	ASYMMETRIC_PROTEIN_LOCALIZATION_INVOLVED_IN_CELL_FATE_DETERMINATION(6)	ASYMMETRIC_PROTEIN_LOCALIZATION_INVOLVED_IN_CELL_FATE_DETERMINATION(6)	GO:0045167	Details ...	18	-0.369792	-1.89958	0.00804829	0.018708	0.982	10714	tags=94%, list=58%, signal=222%	NA
338	TRANSMEMBRANE_RECEPTOR_PROTEIN_SERINE_THREONINE_KINASE_SIGNALING_PATHWAY(7)	TRANSMEMBRANE_RECEPTOR_PROTEIN_SERINE_THREONINE_KINASE_SIGNALING_PATHWAY(7)	GO:0007178	Details ...	19	-0.360427	-1.89461	0.00956023	0.0191984	0.983	8982	tags=84%, list=48%, signal=162%	NA
339	RNA_PROCESSING(6)	RNA_PROCESSING(6)	GO:0006396	Details ...	47	-0.233415	-1.88574	0.00396825	0.0200817	0.985	13105	tags=94%, list=70%, signal=315%	NA
340	PEPTIDYL_THREONINE_MODIFICATION(8)	PEPTIDYL_THREONINE_MODIFICATION(8)	GO:0018210	Details ...	13	-0.427973	-1.8811	0.011194	0.0205914	0.985	10664	tags=100%, list=57%, signal=234%	NA
341	ENZYME_LINKED_RECEPTOR_PROTEIN_SIGNALING_PATHWAY(6)	ENZYME_LINKED_RECEPTOR_PROTEIN_SIGNALING_PATHWAY(6)	GO:0007167	Details ...	58	-0.212746	-1.87837	0.0103093	0.0208116	0.986	13717	tags=95%, list=74%, signal=358%	NA
342	RNA_SPLICING_VIA_TRANSESTERIFICATION_REACTIONS(8)	RNA_SPLICING_VIA_TRANSESTERIFICATION_REACTIONS(8)	GO:0000375	Details ...	20	-0.343208	-1.87688	0.0104384	0.0208866	0.987	11313	tags=95%, list=61%, signal=242%	NA
343	REGULATION_OF_CELL_FATE_COMMITMENT(5)&REGULATION_OF_CELL_FATE_SPECIFICATION(6)	REGULATION_OF_CELL_FATE_COMMITMENT(5)&REGULATION_OF_CELL_FATE_SPECIFICATION(6)	GO:0010453	Details ...	22	-0.32772	-1.8711	0.00792079	0.0214886	0.988	9146	tags=82%, list=49%, signal=161%	NA
344	REGULATION_OF_OVIPOSITION(4)	REGULATION_OF_OVIPOSITION(4)	GO:0046662	Details ...	40	-0.248675	-1.86586	0.0132827	0.0220426	0.989	11680	tags=88%, list=63%, signal=234%	NA
345	PHARYNGEAL_PUMPING(5)	PHARYNGEAL_PUMPING(5)	GO:0043050	Details ...	55	-0.213342	-1.86095	0.0145833	0.0227292	0.992	11959	tags=85%, list=64%, signal=238%	NA
346	REGULATION_OF_NEUROTRANSMITTER_SECRETION(4)&REGULATION_OF_NEUROTRANSMITTER_TRANSPORT(5)	REGULATION_OF_NEUROTRANSMITTER_SECRETION(4)&REGULATION_OF_NEUROTRANSMITTER_TRANSPORT(5)	GO:0046928	Details ...	16	-0.386953	-1.85623	0.0102249	0.0233092	0.992	9100	tags=88%, list=49%, signal=171%	NA
347	REGULATION_OF_PROGRAMMED_CELL_DEATH(5)	REGULATION_OF_PROGRAMMED_CELL_DEATH(5)	GO:0043067	Details ...	46	-0.229147	-1.85612	0.00796813	0.0232508	0.992	8703	tags=70%, list=47%, signal=130%	NA
348	PROTEASOMAL_PROTEIN_CATABOLIC_PROCESS(6)&PROTEASOME_MEDIATED_UBIQUITIN_DEPENDENT_PROTEIN_CATABOLIC_PROCESS(7)	PROTEASOMAL_PROTEIN_CATABOLIC_PROCESS(6)&PROTEASOME_MEDIATED_UBIQUITIN_DEPENDENT_PROTEIN_CATABOLIC_PROCESS(7)	GO:0010498	Details ...	21	-0.337399	-1.85252	0.0101833	0.0236422	0.992	12353	tags=100%, list=66%, signal=296%	NA
349	POSITIVE_REGULATION_OF_TRANSFERASE_ACTIVITY(5)	POSITIVE_REGULATION_OF_TRANSFERASE_ACTIVITY(5)	GO:0051347	Details ...	20	-0.341572	-1.84801	0.00576923	0.024118	0.993	12275	tags=100%, list=66%, signal=293%	NA
350	DEVELOPMENTAL_GROWTH_INVOLVED_IN_MORPHOGENESIS(4)&NEURON_PROJECTION_EXTENSION(5)&AXON_EXTENSION(6)	DEVELOPMENTAL_GROWTH_INVOLVED_IN_MORPHOGENESIS(4)&NEURON_PROJECTION_EXTENSION(5)&AXON_EXTENSION(6)	GO:0060560	Details ...	32	-0.279281	-1.84798	0.0107066	0.0240537	0.993	11691	tags=91%, list=63%, signal=243%	NA
351	REGULATION_OF_FEEDING_BEHAVIOR(4)	REGULATION_OF_FEEDING_BEHAVIOR(4)	GO:0060259	Details ...	38	-0.249047	-1.8466	0.012685	0.0241955	0.993	8118	tags=68%, list=44%, signal=121%	NA
352	REGULATION_OF_PROTEIN_METABOLIC_PROCESS(5)	REGULATION_OF_PROTEIN_METABOLIC_PROCESS(5)	GO:0051246	Details ...	98	-0.160931	-1.84591	0.00925926	0.0242033	0.993	13178	tags=87%, list=71%, signal=295%	NA
353	PROTEIN_TRANSPORT(5)	PROTEIN_TRANSPORT(5)	GO:0015031	Details ...	49	-0.219555	-1.84091	0.0102459	0.0248084	0.995	14172	tags=98%, list=76%, signal=408%	NA
354	POSITIVE_REGULATION_OF_SIGNAL_TRANSDUCTION(4)	POSITIVE_REGULATION_OF_SIGNAL_TRANSDUCTION(4)	GO:0009967	Details ...	39	-0.247071	-1.84089	0.0116732	0.0247383	0.995	9739	tags=77%, list=52%, signal=161%	NA
355	REGULATION_OF_ANATOMICAL_STRUCTURE_MORPHOGENESIS(4)	REGULATION_OF_ANATOMICAL_STRUCTURE_MORPHOGENESIS(4)	GO:0022603	Details ...	45	-0.232796	-1.83927	0.00959693	0.0248878	0.995	9751	tags=76%, list=52%, signal=158%	NA
356	NEUROTRANSMITTER_SECRETION(5)	NEUROTRANSMITTER_SECRETION(5)	GO:0007269	Details ...	31	-0.280215	-1.83616	0.0203666	0.0252909	0.995	12218	tags=94%, list=66%, signal=271%	NA
357	ACETATE_ESTER_TRANSPORT(4)&ACETYLCHOLINE_TRANSPORT(5)	ACETATE_ESTER_TRANSPORT(4)&ACETYLCHOLINE_TRANSPORT(5)	GO:1901374	Details ...	16	-0.386953	-1.83615	0.0104822	0.0252201	0.995	9100	tags=88%, list=49%, signal=171%	NA
358	MRNA_SPLICING_VIA_SPLICEOSOME(8)&RNA_SPLICING_VIA_TRANSESTERIFICATION_REACTIONS_WITH_BULGED_ADENOSINE_AS_NUCLEOPHILE(9)	MRNA_SPLICING_VIA_SPLICEOSOME(8)&RNA_SPLICING_VIA_TRANSESTERIFICATION_REACTIONS_WITH_BULGED_ADENOSINE_AS_NUCLEOPHILE(9)	GO:0000398	Details ...	19	-0.347648	-1.83501	0.015534	0.0252901	0.995	11181	tags=95%, list=60%, signal=237%	NA
359	AXIS_SPECIFICATION(5)	AXIS_SPECIFICATION(5)	GO:0009798	Details ...	23	-0.328615	-1.8319	0.0164609	0.0257302	0.995	10087	tags=87%, list=54%, signal=189%	NA
360	POSITIVE_REGULATION_OF_SECRETION_BY_CELL(4)	POSITIVE_REGULATION_OF_SECRETION_BY_CELL(4)	GO:1903532	Details ...	14	-0.402601	-1.83125	0.0155039	0.0257535	0.995	9806	tags=93%, list=53%, signal=196%	NA
361	DORSAL_VENTRAL_AXON_GUIDANCE(7)	DORSAL_VENTRAL_AXON_GUIDANCE(7)	GO:0033563	Details ...	18	-0.365921	-1.82913	0.0147059	0.0259252	0.995	9751	tags=89%, list=52%, signal=186%	NA
362	REGULATION_OF_EMBRYONIC_DEVELOPMENT(5)	REGULATION_OF_EMBRYONIC_DEVELOPMENT(5)	GO:0045995	Details ...	16	-0.381557	-1.82233	0.0221328	0.0268471	0.996	8036	tags=81%, list=43%, signal=143%	NA
363	EPIDERMIS_DEVELOPMENT(5)	EPIDERMIS_DEVELOPMENT(5)	GO:0008544	Details ...	24	-0.309574	-1.82172	0.0197628	0.026829	0.996	8214	tags=75%, list=44%, signal=134%	NA
364	ORGANOPHOSPHATE_BIOSYNTHETIC_PROCESS(5)	ORGANOPHOSPHATE_BIOSYNTHETIC_PROCESS(5)	GO:0090407	Details ...	44	-0.228846	-1.8191	0.0184426	0.0271913	0.997	13955	tags=98%, list=75%, signal=388%	NA
365	VESICLE_LOCALIZATION(5)&ESTABLISHMENT_OF_VESICLE_LOCALIZATION(5)	VESICLE_LOCALIZATION(5)&ESTABLISHMENT_OF_VESICLE_LOCALIZATION(5)	GO:0051648	Details ...	31	-0.273118	-1.81484	0.0039604	0.0277419	0.998	13552	tags=100%, list=73%, signal=366%	NA
366	REGULATION_OF_PROTEIN_CATABOLIC_PROCESS(5)	REGULATION_OF_PROTEIN_CATABOLIC_PROCESS(5)	GO:0042176	Details ...	15	-0.397285	-1.81305	0.0117878	0.0279382	0.998	8752	tags=87%, list=47%, signal=163%	NA
367	RNA_CATABOLIC_PROCESS(6)	RNA_CATABOLIC_PROCESS(6)	GO:0006401	Details ...	24	-0.307572	-1.80745	0.00607288	0.0287088	0.999	12909	tags=100%, list=69%, signal=325%	NA
368	NUCLEOBASE_CONTAINING_SMALL_MOLECULE_METABOLIC_PROCESS(4)	NUCLEOBASE_CONTAINING_SMALL_MOLECULE_METABOLIC_PROCESS(4)	GO:0055086	Details ...	57	-0.202494	-1.80482	0.00862069	0.0290512	1	12256	tags=86%, list=66%, signal=250%	NA
369	POSITIVE_REGULATION_OF_PROTEIN_KINASE_ACTIVITY(7)	POSITIVE_REGULATION_OF_PROTEIN_KINASE_ACTIVITY(7)	GO:0045860	Details ...	16	-0.374412	-1.80075	0.0151803	0.0297108	1	8169	tags=81%, list=44%, signal=145%	NA
370	POSITIVE_REGULATION_OF_PROTEIN_PHOSPHORYLATION(7)	POSITIVE_REGULATION_OF_PROTEIN_PHOSPHORYLATION(7)	GO:0001934	Details ...	21	-0.323861	-1.79353	0.0193798	0.030703	1	8169	tags=76%, list=44%, signal=136%	NA
371	TRANSMEMBRANE_TRANSPORT(4)	TRANSMEMBRANE_TRANSPORT(4)	GO:0055085	Details ...	101	-0.155273	-1.79324	0.0116279	0.03067	1	14648	tags=94%, list=79%, signal=438%	NA
372	REGULATION_OF_SYNAPSE_ORGANIZATION(4)	REGULATION_OF_SYNAPSE_ORGANIZATION(4)	GO:0050807	Details ...	9	-0.488132	-1.79263	0.0221774	0.0307009	1	9542	tags=100%, list=51%, signal=205%	NA
373	POSITIVE_REGULATION_OF_PROGRAMMED_CELL_DEATH(5)	POSITIVE_REGULATION_OF_PROGRAMMED_CELL_DEATH(5)	GO:0043068	Details ...	23	-0.315928	-1.79192	0.0287474	0.0307352	1	8703	tags=78%, list=47%, signal=147%	NA
374	DETECTION_OF_STIMULUS(3)	DETECTION_OF_STIMULUS(3)	GO:0051606	Details ...	10	-0.458676	-1.78747	0.0203666	0.0313686	1	10091	tags=100%, list=54%, signal=218%	NA
375	REGULATION_OF_SYNAPSE_STRUCTURE_OR_ACTIVITY(4)	REGULATION_OF_SYNAPSE_STRUCTURE_OR_ACTIVITY(4)	GO:0050803	Details ...	13	-0.41126	-1.78542	0.0167715	0.0316405	1	9542	tags=92%, list=51%, signal=189%	NA
376	RIBOSE_PHOSPHATE_METABOLIC_PROCESS(5)&RIBONUCLEOTIDE_METABOLIC_PROCESS(6)	RIBOSE_PHOSPHATE_METABOLIC_PROCESS(5)&RIBONUCLEOTIDE_METABOLIC_PROCESS(6)	GO:0019693	Details ...	33	-0.265473	-1.78376	0.00650759	0.0318321	1	12001	tags=91%, list=64%, signal=255%	NA
377	PROTEIN_UBIQUITINATION(9)	PROTEIN_UBIQUITINATION(9)	GO:0016567	Details ...	28	-0.281009	-1.77845	0.00952381	0.0325862	1	12739	tags=96%, list=68%, signal=304%	NA
378	REGULATION_OF_PHAGOCYTOSIS(5)	REGULATION_OF_PHAGOCYTOSIS(5)	GO:0050764	Details ...	18	-0.347553	-1.77664	0.0252918	0.0328598	1	12163	tags=100%, list=65%, signal=288%	NA
379	ACETYLCHOLINE_SECRETION(5)&ACETYLCHOLINE_SECRETION_NEUROTRANSMISSION(6)	ACETYLCHOLINE_SECRETION(5)&ACETYLCHOLINE_SECRETION_NEUROTRANSMISSION(6)	GO:0061526	Details ...	11	-0.42096	-1.77196	0.01875	0.0335805	1	9100	tags=91%, list=49%, signal=178%	NA
380	REGULATION_OF_CELLULAR_COMPONENT_BIOGENESIS(3)	REGULATION_OF_CELLULAR_COMPONENT_BIOGENESIS(3)	GO:0044087	Details ...	26	-0.282949	-1.7719	0.0174419	0.0335165	1	11218	tags=88%, list=60%, signal=222%	NA
381	REGULATION_OF_PHARYNGEAL_PUMPING(5)	REGULATION_OF_PHARYNGEAL_PUMPING(5)	GO:0043051	Details ...	35	-0.250513	-1.77155	0.0178926	0.0335151	1	8118	tags=69%, list=44%, signal=121%	NA
382	PEPTIDYL_THREONINE_PHOSPHORYLATION(8)	PEPTIDYL_THREONINE_PHOSPHORYLATION(8)	GO:0018107	Details ...	10	-0.448526	-1.76632	0.0125	0.0343459	1	10280	tags=100%, list=55%, signal=223%	NA
383	REGULATION_OF_CATABOLIC_PROCESS(4)	REGULATION_OF_CATABOLIC_PROCESS(4)	GO:0009894	Details ...	24	-0.290372	-1.76463	0.012685	0.0345487	1	7795	tags=71%, list=42%, signal=122%	NA
384	NEGATIVE_REGULATION_OF_SMALL_GTPASE_MEDIATED_SIGNAL_TRANSDUCTION(6)&NEGATIVE_REGULATION_OF_RAS_PROTEIN_SIGNAL_TRANSDUCTION(7)	NEGATIVE_REGULATION_OF_SMALL_GTPASE_MEDIATED_SIGNAL_TRANSDUCTION(6)&NEGATIVE_REGULATION_OF_RAS_PROTEIN_SIGNAL_TRANSDUCTION(7)	GO:0051058	Details ...	13	-0.407707	-1.76378	0.0199601	0.0345649	1	8175	tags=85%, list=44%, signal=151%	NA
385	GLYCOPROTEIN_METABOLIC_PROCESS(5)	GLYCOPROTEIN_METABOLIC_PROCESS(5)	GO:0009100	Details ...	32	-0.261078	-1.76308	0.0146138	0.0345781	1	13194	tags=97%, list=71%, signal=331%	NA
386	RESPONSE_TO_ABIOTIC_STIMULUS(3)	RESPONSE_TO_ABIOTIC_STIMULUS(3)	GO:0009628	Details ...	145	-0.127208	-1.7615	0.018	0.0347932	1	15381	tags=95%, list=83%, signal=541%	NA
387	SISTER_CHROMATID_SEGREGATION(5)	SISTER_CHROMATID_SEGREGATION(5)	GO:0000819	Details ...	45	-0.226128	-1.75537	0.0175439	0.0357512	1	11117	tags=82%, list=60%, signal=203%	NA
388	CELL_JUNCTION_ORGANIZATION(4)	CELL_JUNCTION_ORGANIZATION(4)	GO:0034330	Details ...	19	-0.339142	-1.75467	0.0206186	0.0357709	1	7417	tags=74%, list=40%, signal=122%	NA
389	POSITIVE_REGULATION_OF_PROTEIN_MODIFICATION_PROCESS(6)	POSITIVE_REGULATION_OF_PROTEIN_MODIFICATION_PROCESS(6)	GO:0031401	Details ...	26	-0.292769	-1.75322	0.025641	0.0359298	1	8169	tags=73%, list=44%, signal=130%	NA
390	SYNAPTIC_VESICLE_TRANSPORT(4)&SYNAPTIC_VESICLE_LOCALIZATION(6)&ESTABLISHMENT_OF_SYNAPTIC_VESICLE_LOCALIZATION(6)	SYNAPTIC_VESICLE_TRANSPORT(4)&SYNAPTIC_VESICLE_LOCALIZATION(6)&ESTABLISHMENT_OF_SYNAPTIC_VESICLE_LOCALIZATION(6)	GO:0048489	Details ...	28	-0.273074	-1.753	0.02	0.0358537	1	13552	tags=100%, list=73%, signal=366%	NA
391	REGULATION_OF_CELL_MORPHOGENESIS(4)	REGULATION_OF_CELL_MORPHOGENESIS(4)	GO:0022604	Details ...	34	-0.247051	-1.75255	0.0222672	0.0358497	1	6366	tags=59%, list=34%, signal=89%	NA
392	REGULATION_OF_RESPONSE_TO_EXTERNAL_STIMULUS(4)	REGULATION_OF_RESPONSE_TO_EXTERNAL_STIMULUS(4)	GO:0032101	Details ...	25	-0.293523	-1.74976	0.0207469	0.0363454	1	10935	tags=88%, list=59%, signal=213%	NA
393	POSITIVE_REGULATION_OF_KINASE_ACTIVITY(6)	POSITIVE_REGULATION_OF_KINASE_ACTIVITY(6)	GO:0033674	Details ...	18	-0.341535	-1.7479	0.0281955	0.0366117	1	12275	tags=100%, list=66%, signal=293%	NA
394	CYTOSKELETON_DEPENDENT_INTRACELLULAR_TRANSPORT(5)&MICROTUBULE_BASED_TRANSPORT(6)	CYTOSKELETON_DEPENDENT_INTRACELLULAR_TRANSPORT(5)&MICROTUBULE_BASED_TRANSPORT(6)	GO:0030705	Details ...	18	-0.339816	-1.74747	0.0193798	0.0366025	1	12307	tags=100%, list=66%, signal=294%	NA
395	REGULATION_OF_CELLULAR_PROTEIN_METABOLIC_PROCESS(5)	REGULATION_OF_CELLULAR_PROTEIN_METABOLIC_PROCESS(5)	GO:0032268	Details ...	92	-0.152185	-1.74375	0.0264901	0.0371916	1	13178	tags=86%, list=71%, signal=292%	NA
396	ENTRY_INTO_DIAPAUSE(4)&DAUER_ENTRY(5)	ENTRY_INTO_DIAPAUSE(4)&DAUER_ENTRY(5)	GO:0055115	Details ...	20	-0.319967	-1.74085	0.0229885	0.0377247	1	10814	tags=90%, list=58%, signal=214%	NA
397	NUCLEAR_MIGRATION(6)	NUCLEAR_MIGRATION(6)	GO:0007097	Details ...	53	-0.201231	-1.73663	0.0191939	0.0384628	1	14542	tags=98%, list=78%, signal=446%	NA
398	POSITIVE_REGULATION_OF_CELLULAR_COMPONENT_ORGANIZATION(3)	POSITIVE_REGULATION_OF_CELLULAR_COMPONENT_ORGANIZATION(3)	GO:0051130	Details ...	33	-0.256763	-1.73504	0.0313725	0.0386931	1	12163	tags=91%, list=65%, signal=261%	NA
399	MORPHOGENESIS_OF_EMBRYONIC_EPITHELIUM(5)	MORPHOGENESIS_OF_EMBRYONIC_EPITHELIUM(5)	GO:0016331	Details ...	13	-0.398217	-1.7339	0.0225873	0.0388068	1	11218	tags=100%, list=60%, signal=251%	NA
400	NEGATIVE_REGULATION_OF_LOCOMOTION(3)	NEGATIVE_REGULATION_OF_LOCOMOTION(3)	GO:0040013	Details ...	19	-0.326801	-1.72835	0.0186722	0.0396893	1	11569	tags=95%, list=62%, signal=250%	NA
401	REGULATION_OF_PHAGOCYTOSIS_ENGULFMENT(6)	REGULATION_OF_PHAGOCYTOSIS_ENGULFMENT(6)	GO:0060099	Details ...	17	-0.347534	-1.7276	0.0251572	0.0397417	1	12163	tags=100%, list=65%, signal=288%	NA
402	EMBRYONIC_DIGESTIVE_TRACT_DEVELOPMENT(5)	EMBRYONIC_DIGESTIVE_TRACT_DEVELOPMENT(5)	GO:0048566	Details ...	11	-0.421888	-1.72602	0.0147368	0.0399492	1	7389	tags=82%, list=40%, signal=136%	NA
403	ION_TRANSMEMBRANE_TRANSPORT(5)	ION_TRANSMEMBRANE_TRANSPORT(5)	GO:0034220	Details ...	74	-0.169063	-1.7258	0.0206186	0.0398966	1	12977	tags=86%, list=70%, signal=284%	NA
404	MICROTUBULE_BASED_MOVEMENT(5)	MICROTUBULE_BASED_MOVEMENT(5)	GO:0007018	Details ...	33	-0.24902	-1.72515	0.0217822	0.0399247	1	12307	tags=91%, list=66%, signal=267%	NA
405	ORGANONITROGEN_COMPOUND_BIOSYNTHETIC_PROCESS(5)	ORGANONITROGEN_COMPOUND_BIOSYNTHETIC_PROCESS(5)	GO:1901566	Details ...	56	-0.198816	-1.72489	0.0208333	0.0398803	1	14939	tags=100%, list=80%, signal=503%	NA
406	PYRIMIDINE_CONTAINING_COMPOUND_CATABOLIC_PROCESS(6)	PYRIMIDINE_CONTAINING_COMPOUND_CATABOLIC_PROCESS(6)	GO:0072529	Details ...	10	-0.448257	-1.72393	0.0214844	0.0399043	1	10285	tags=100%, list=55%, signal=223%	NA
407	REGULATION_OF_CHEMOTAXIS(4)	REGULATION_OF_CHEMOTAXIS(4)	GO:0050920	Details ...	16	-0.35093	-1.71902	0.0236686	0.0407505	1	10935	tags=94%, list=59%, signal=227%	NA
408	REGULATION_OF_TRANSFERASE_ACTIVITY(5)	REGULATION_OF_TRANSFERASE_ACTIVITY(5)	GO:0051338	Details ...	39	-0.230798	-1.71841	0.0263692	0.0407997	1	14341	tags=100%, list=77%, signal=433%	NA
409	POSITIVE_REGULATION_OF_HYDROLASE_ACTIVITY(5)	POSITIVE_REGULATION_OF_HYDROLASE_ACTIVITY(5)	GO:0051345	Details ...	24	-0.29475	-1.71387	0.0353635	0.0416722	1	11595	tags=92%, list=62%, signal=242%	NA
410	REGULATION_OF_CELL_GROWTH(4)	REGULATION_OF_CELL_GROWTH(4)	GO:0001558	Details ...	23	-0.30314	-1.71386	0.0253906	0.0415706	1	9751	tags=83%, list=52%, signal=173%	NA
411	SINGLE_ORGANISM_BIOSYNTHETIC_PROCESS(4)	SINGLE_ORGANISM_BIOSYNTHETIC_PROCESS(4)	GO:0044711	Details ...	110	-0.14242	-1.71181	0.0229885	0.0419463	1	14978	tags=95%, list=80%, signal=479%	NA
412	TRANSMEMBRANE_RECEPTOR_PROTEIN_TYROSINE_KINASE_SIGNALING_PATHWAY(7)	TRANSMEMBRANE_RECEPTOR_PROTEIN_TYROSINE_KINASE_SIGNALING_PATHWAY(7)	GO:0007169	Details ...	36	-0.236487	-1.71118	0.0177866	0.0419622	1	13717	tags=97%, list=74%, signal=368%	NA
413	MRNA_PROCESSING(7)	MRNA_PROCESSING(7)	GO:0006397	Details ...	26	-0.284938	-1.70835	0.032197	0.0424594	1	11181	tags=88%, list=60%, signal=221%	NA
414	CELLULAR_AMINO_ACID_METABOLIC_PROCESS(4)	CELLULAR_AMINO_ACID_METABOLIC_PROCESS(4)	GO:0006520	Details ...	16	-0.351021	-1.70824	0.0327869	0.0423792	1	7440	tags=75%, list=40%, signal=125%	NA
415	CILIUM_ASSEMBLY(5)	CILIUM_ASSEMBLY(5)	GO:0042384	Details ...	24	-0.294282	-1.70316	0.0160321	0.0434201	1	12380	tags=96%, list=66%, signal=285%	NA
416	REGULATION_OF_PROTEIN_COMPLEX_ASSEMBLY(4)&REGULATION_OF_PROTEIN_POLYMERIZATION(5)	REGULATION_OF_PROTEIN_COMPLEX_ASSEMBLY(4)&REGULATION_OF_PROTEIN_POLYMERIZATION(5)	GO:0043254	Details ...	13	-0.398217	-1.70151	0.0242915	0.0436921	1	11218	tags=100%, list=60%, signal=251%	NA
417	CARBOHYDRATE_DERIVATIVE_CATABOLIC_PROCESS(5)	CARBOHYDRATE_DERIVATIVE_CATABOLIC_PROCESS(5)	GO:1901136	Details ...	14	-0.376871	-1.70146	0.0237624	0.0436062	1	10285	tags=93%, list=55%, signal=207%	NA
418	CELL_JUNCTION_ASSEMBLY(5)	CELL_JUNCTION_ASSEMBLY(5)	GO:0034329	Details ...	16	-0.352256	-1.70033	0.0311284	0.043727	1	7417	tags=75%, list=40%, signal=124%	NA
419	SYNAPSE_ASSEMBLY(5)	SYNAPSE_ASSEMBLY(5)	GO:0007416	Details ...	9	-0.467183	-1.69805	0.0214844	0.0441676	1	7862	tags=89%, list=42%, signal=154%	NA
420	ANION_TRANSPORT(5)	ANION_TRANSPORT(5)	GO:0006820	Details ...	45	-0.209827	-1.6965	0.014862	0.0443917	1	11834	tags=84%, list=64%, signal=231%	NA
421	RESPONSE_TO_ENDOGENOUS_STIMULUS(3)	RESPONSE_TO_ENDOGENOUS_STIMULUS(3)	GO:0009719	Details ...	36	-0.236487	-1.69458	0.0180723	0.0447458	1	13717	tags=97%, list=74%, signal=368%	NA
422	PROTEIN_POLYMERIZATION(7)	PROTEIN_POLYMERIZATION(7)	GO:0051258	Details ...	27	-0.281015	-1.69434	0.0245902	0.0447178	1	13404	tags=100%, list=72%, signal=356%	NA
423	REGULATION_OF_DEFENSE_RESPONSE(5)	REGULATION_OF_DEFENSE_RESPONSE(5)	GO:0031347	Details ...	9	-0.450859	-1.69384	0.0314961	0.0447383	1	8166	tags=89%, list=44%, signal=158%	NA
424	SPECIFICATION_OF_AXIS_POLARITY(5)	SPECIFICATION_OF_AXIS_POLARITY(5)	GO:0065001	Details ...	13	-0.381988	-1.69371	0.0246914	0.0446697	1	10087	tags=92%, list=54%, signal=201%	NA
425	NECROTIC_CELL_DEATH(5)	NECROTIC_CELL_DEATH(5)	GO:0070265	Details ...	27	-0.273167	-1.6914	0.0298805	0.0451474	1	13550	tags=100%, list=73%, signal=366%	NA
426	EMBRYONIC_PATTERN_SPECIFICATION(5)	EMBRYONIC_PATTERN_SPECIFICATION(5)	GO:0009880	Details ...	21	-0.296175	-1.69051	0.0160321	0.0451918	1	12233	tags=95%, list=66%, signal=277%	NA
427	REGULATION_OF_APOPTOTIC_PROCESS(6)	REGULATION_OF_APOPTOTIC_PROCESS(6)	GO:0042981	Details ...	34	-0.242421	-1.68657	0.034749	0.04603	1	8644	tags=71%, list=46%, signal=131%	NA
428	SECOND_MESSENGER_MEDIATED_SIGNALING(6)	SECOND_MESSENGER_MEDIATED_SIGNALING(6)	GO:0019932	Details ...	10	-0.428924	-1.68632	0.0345528	0.0459771	1	10645	tags=100%, list=57%, signal=233%	NA
429	REGULATION_OF_ACTIN_FILAMENT_LENGTH(5)&REGULATION_OF_ACTIN_POLYMERIZATION_OR_DEPOLYMERIZATION(6)&REGULATION_OF_ACTIN_FILAMENT_POLYMERIZATION(6)&ACTIN_POLYMERIZATION_OR_DEPOLYMERIZATION(7)&ACTIN_FILAMENT_POLYMERIZATION(8)	REGULATION_OF_ACTIN_FILAMENT_LENGTH(5)&REGULATION_OF_ACTIN_POLYMERIZATION_OR_DEPOLYMERIZATION(6)&REGULATION_OF_ACTIN_FILAMENT_POLYMERIZATION(6)&ACTIN_POLYMERIZATION_OR_DEPOLYMERIZATION(7)&ACTIN_FILAMENT_POLYMERIZATION(8)	GO:0030832	Details ...	12	-0.398195	-1.68222	0.0359281	0.0469413	1	11218	tags=100%, list=60%, signal=251%	NA
430	ION_TRANSPORT(4)	ION_TRANSPORT(4)	GO:0006811	Details ...	121	-0.130822	-1.68165	0.0223124	0.0469513	1	12977	tags=83%, list=70%, signal=271%	NA
431	NEGATIVE_REGULATION_OF_ORGANELLE_ORGANIZATION(4)	NEGATIVE_REGULATION_OF_ORGANELLE_ORGANIZATION(4)	GO:0010639	Details ...	21	-0.303086	-1.67934	0.0222672	0.0474854	1	10330	tags=86%, list=55%, signal=192%	NA
432	ANTERIOR_POSTERIOR_AXIS_SPECIFICATION(6)	ANTERIOR_POSTERIOR_AXIS_SPECIFICATION(6)	GO:0009948	Details ...	17	-0.341309	-1.67773	0.024952	0.0477677	1	10087	tags=88%, list=54%, signal=192%	NA
433	CELLULAR_RESPONSE_TO_EXTRACELLULAR_STIMULUS(4)&CELLULAR_RESPONSE_TO_EXTERNAL_STIMULUS(4)	CELLULAR_RESPONSE_TO_EXTRACELLULAR_STIMULUS(4)&CELLULAR_RESPONSE_TO_EXTERNAL_STIMULUS(4)	GO:0031668	Details ...	15	-0.369027	-1.67752	0.0421687	0.0477192	1	8036	tags=80%, list=43%, signal=141%	NA
434	GLYCOPROTEIN_BIOSYNTHETIC_PROCESS(6)	GLYCOPROTEIN_BIOSYNTHETIC_PROCESS(6)	GO:0009101	Details ...	30	-0.258963	-1.67729	0.0319361	0.0476677	1	13194	tags=97%, list=71%, signal=331%	NA
435	MAINTENANCE_OF_PROTEIN_LOCATION(4)	MAINTENANCE_OF_PROTEIN_LOCATION(4)	GO:0045185	Details ...	15	-0.355386	-1.66419	0.0340265	0.0507261	1	9532	tags=87%, list=51%, signal=177%	NA
436	POSITIVE_REGULATION_OF_NEUROTRANSMITTER_TRANSPORT(4)&POSITIVE_REGULATION_OF_NEUROTRANSMITTER_SECRETION(5)	POSITIVE_REGULATION_OF_NEUROTRANSMITTER_TRANSPORT(4)&POSITIVE_REGULATION_OF_NEUROTRANSMITTER_SECRETION(5)	GO:0051590	Details ...	11	-0.42096	-1.66351	0.0409836	0.0508102	1	9100	tags=91%, list=49%, signal=178%	NA
437	POSITIVE_REGULATION_OF_INTRACELLULAR_SIGNAL_TRANSDUCTION(5)	POSITIVE_REGULATION_OF_INTRACELLULAR_SIGNAL_TRANSDUCTION(5)	GO:1902533	Details ...	22	-0.296101	-1.65935	0.040619	0.0517025	1	12275	tags=95%, list=66%, signal=279%	NA
438	RESPONSE_TO_TRANSFORMING_GROWTH_FACTOR_BETA(4)&CELLULAR_RESPONSE_TO_TRANSFORMING_GROWTH_FACTOR_BETA_STIMULUS(5)&TRANSFORMING_GROWTH_FACTOR_BETA_RECEPTOR_SIGNALING_PATHWAY(6)	RESPONSE_TO_TRANSFORMING_GROWTH_FACTOR_BETA(4)&CELLULAR_RESPONSE_TO_TRANSFORMING_GROWTH_FACTOR_BETA_STIMULUS(5)&TRANSFORMING_GROWTH_FACTOR_BETA_RECEPTOR_SIGNALING_PATHWAY(6)	GO:0071559	Details ...	13	-0.373654	-1.64678	0.0348361	0.0548783	1	8809	tags=85%, list=47%, signal=160%	NA
439	NOTCH_SIGNALING_PATHWAY(6)	NOTCH_SIGNALING_PATHWAY(6)	GO:0007219	Details ...	23	-0.289387	-1.64476	0.0452756	0.0552345	1	11627	tags=91%, list=62%, signal=243%	NA
440	RESPONSE_TO_HERMAPHRODITE_CONTACT(6)	RESPONSE_TO_HERMAPHRODITE_CONTACT(6)	GO:0034606	Details ...	10	-0.426825	-1.64285	0.0420842	0.055654	1	8821	tags=90%, list=47%, signal=171%	NA
441	NEGATIVE_REGULATION_OF_TRANSPORT(3)	NEGATIVE_REGULATION_OF_TRANSPORT(3)	GO:0051051	Details ...	16	-0.354583	-1.63977	0.0464646	0.0563278	1	10867	tags=94%, list=58%, signal=225%	NA
442	RHO_PROTEIN_SIGNAL_TRANSDUCTION(8)	RHO_PROTEIN_SIGNAL_TRANSDUCTION(8)	GO:0007266	Details ...	18	-0.32246	-1.63936	0.0346821	0.0562989	1	11595	tags=94%, list=62%, signal=250%	NA
443	RESPONSE_TO_NITROGEN_COMPOUND(4)	RESPONSE_TO_NITROGEN_COMPOUND(4)	GO:1901698	Details ...	26	-0.264176	-1.63928	0.0327869	0.0561965	1	13717	tags=100%, list=74%, signal=379%	NA
444	REGULATION_OF_IMMUNE_SYSTEM_PROCESS(3)&REGULATION_OF_IMMUNE_RESPONSE(4)	REGULATION_OF_IMMUNE_SYSTEM_PROCESS(3)&REGULATION_OF_IMMUNE_RESPONSE(4)	GO:0002682	Details ...	9	-0.450859	-1.63922	0.0446809	0.0560734	1	8166	tags=89%, list=44%, signal=158%	NA
445	REGULATION_OF_KINASE_ACTIVITY(6)	REGULATION_OF_KINASE_ACTIVITY(6)	GO:0043549	Details ...	36	-0.230761	-1.63229	0.030426	0.0578659	1	14341	tags=100%, list=77%, signal=433%	NA
446	REGULATION_OF_NEURON_PROJECTION_DEVELOPMENT(5)	REGULATION_OF_NEURON_PROJECTION_DEVELOPMENT(5)	GO:0010975	Details ...	25	-0.27705	-1.63067	0.0495049	0.0581189	1	9751	tags=80%, list=52%, signal=168%	NA
447	CELLULAR_RESPONSE_TO_ENDOGENOUS_STIMULUS(4)	CELLULAR_RESPONSE_TO_ENDOGENOUS_STIMULUS(4)	GO:0071495	Details ...	35	-0.235679	-1.62637	0.0352941	0.0591795	1	13717	tags=97%, list=74%, signal=368%	NA
448	DETECTION_OF_STIMULUS_INVOLVED_IN_SENSORY_PERCEPTION(4)	DETECTION_OF_STIMULUS_INVOLVED_IN_SENSORY_PERCEPTION(4)	GO:0050906	Details ...	8	-0.458626	-1.62304	0.0365112	0.0599215	1	10091	tags=100%, list=54%, signal=218%	NA
449	CELL_RECOGNITION(4)	CELL_RECOGNITION(4)	GO:0008037	Details ...	75	-0.156024	-1.62292	0.0478012	0.0598165	1	8036	tags=59%, list=43%, signal=103%	NA
450	PURINE_CONTAINING_COMPOUND_BIOSYNTHETIC_PROCESS(6)&PURINE_NUCLEOTIDE_BIOSYNTHETIC_PROCESS(7)&PURINE_RIBONUCLEOTIDE_BIOSYNTHETIC_PROCESS(8)	PURINE_CONTAINING_COMPOUND_BIOSYNTHETIC_PROCESS(6)&PURINE_NUCLEOTIDE_BIOSYNTHETIC_PROCESS(7)&PURINE_RIBONUCLEOTIDE_BIOSYNTHETIC_PROCESS(8)	GO:0072522	Details ...	13	-0.36975	-1.62144	0.0275049	0.0601463	1	11748	tags=100%, list=63%, signal=270%	NA
451	NEGATIVE_REGULATION_OF_CYTOSKELETON_ORGANIZATION(5)	NEGATIVE_REGULATION_OF_CYTOSKELETON_ORGANIZATION(5)	GO:0051494	Details ...	13	-0.368936	-1.61809	0.0472441	0.0609359	1	10330	tags=92%, list=55%, signal=207%	NA
452	SPINDLE_ELONGATION(5)	SPINDLE_ELONGATION(5)	GO:0051231	Details ...	10	-0.422856	-1.61703	0.0425101	0.0610868	1	10758	tags=100%, list=58%, signal=237%	NA
453	CELL_PROLIFERATION(3)	CELL_PROLIFERATION(3)	GO:0008283	Details ...	110	-0.133662	-1.61673	0.0363289	0.0610595	1	12769	tags=82%, list=69%, signal=259%	NA
454	NEUROLOGICAL_SYSTEM_PROCESS(5)	NEUROLOGICAL_SYSTEM_PROCESS(5)	GO:0050877	Details ...	47	-0.199257	-1.61308	0.0329218	0.0619131	1	14929	tags=100%, list=80%, signal=502%	NA
455	REGULATION_OF_PROTEIN_KINASE_ACTIVITY(7)	REGULATION_OF_PROTEIN_KINASE_ACTIVITY(7)	GO:0045859	Details ...	34	-0.230736	-1.6106	0.0291829	0.0622566	1	14341	tags=100%, list=77%, signal=433%	NA
456	REGULATION_OF_WNT_SIGNALING_PATHWAY(5)	REGULATION_OF_WNT_SIGNALING_PATHWAY(5)	GO:0030111	Details ...	10	-0.41625	-1.60806	0.043222	0.0629182	1	10881	tags=100%, list=58%, signal=240%	NA
457	EPITHELIAL_CELL_DIFFERENTIATION(6)	EPITHELIAL_CELL_DIFFERENTIATION(6)	GO:0030855	Details ...	17	-0.316719	-1.60724	0.0404858	0.0630356	1	5065	tags=59%, list=27%, signal=81%	NA
458	MRNA_CATABOLIC_PROCESS(7)	MRNA_CATABOLIC_PROCESS(7)	GO:0006402	Details ...	19	-0.30749	-1.60268	0.038	0.0642727	1	12909	tags=100%, list=69%, signal=325%	NA
459	VACUOLE_ORGANIZATION(4)	VACUOLE_ORGANIZATION(4)	GO:0007033	Details ...	21	-0.285707	-1.60235	0.0495049	0.0642664	1	13315	tags=100%, list=71%, signal=350%	NA
460	REGULATION_OF_PROTEOLYSIS(6)	REGULATION_OF_PROTEOLYSIS(6)	GO:0030162	Details ...	13	-0.362366	-1.60229	0.0401606	0.064145	1	7586	tags=77%, list=41%, signal=130%	NA
461	NONMOTILE_PRIMARY_CILIUM_ASSEMBLY(6)	NONMOTILE_PRIMARY_CILIUM_ASSEMBLY(6)	GO:0035058	Details ...	15	-0.339761	-1.60203	0.0453649	0.0640774	1	12307	tags=100%, list=66%, signal=294%	NA
462	PROTEIN_LOCALIZATION_TO_ORGANELLE(6)	PROTEIN_LOCALIZATION_TO_ORGANELLE(6)	GO:0033365	Details ...	35	-0.227202	-1.59233	0.0468432	0.0668122	1	12810	tags=91%, list=69%, signal=292%	NA
463	POSITIVE_REGULATION_OF_PHOSPHORUS_METABOLIC_PROCESS(5)&POSITIVE_REGULATION_OF_PHOSPHATE_METABOLIC_PROCESS(6)	POSITIVE_REGULATION_OF_PHOSPHORUS_METABOLIC_PROCESS(5)&POSITIVE_REGULATION_OF_PHOSPHATE_METABOLIC_PROCESS(6)	GO:0010562	Details ...	26	-0.255467	-1.59069	0.0478088	0.0671952	1	8863	tags=73%, list=48%, signal=139%	NA
464	EMBRYONIC_ORGAN_DEVELOPMENT(4)	EMBRYONIC_ORGAN_DEVELOPMENT(4)	GO:0048568	Details ...	15	-0.337659	-1.58811	0.0459082	0.0678798	1	9862	tags=87%, list=53%, signal=184%	NA
465	SIGNAL_TRANSDUCTION_BY_PHOSPHORYLATION(4)	SIGNAL_TRANSDUCTION_BY_PHOSPHORYLATION(4)	GO:0023014	Details ...	32	-0.237032	-1.58543	0.0498008	0.0685543	1	13059	tags=94%, list=70%, signal=313%	NA
466	MECHANOSENSORY_BEHAVIOR(4)	MECHANOSENSORY_BEHAVIOR(4)	GO:0007638	Details ...	25	-0.267122	-1.58497	0.0396476	0.068535	1	7700	tags=68%, list=41%, signal=116%	NA
467	CELLULAR_COMPONENT_DISASSEMBLY(4)	CELLULAR_COMPONENT_DISASSEMBLY(4)	GO:0022411	Details ...	33	-0.23126	-1.58386	0.0407332	0.0687714	1	10379	tags=79%, list=56%, signal=178%	NA
468	MOTOR_NEURON_AXON_GUIDANCE(7)	MOTOR_NEURON_AXON_GUIDANCE(7)	GO:0008045	Details ...	13	-0.364362	-1.57806	0.0407332	0.0707992	1	8982	tags=85%, list=48%, signal=163%	NA
469	PROTEIN_LOCALIZATION_TO_SYNAPSE(5)	PROTEIN_LOCALIZATION_TO_SYNAPSE(5)	GO:0035418	Details ...	13	-0.357979	-1.57561	0.0431211	0.0713015	1	10534	tags=92%, list=57%, signal=212%	NA
470	LIPID_METABOLIC_PROCESS(4)	LIPID_METABOLIC_PROCESS(4)	GO:0006629	Details ...	95	-0.139354	-1.56565	0.0385396	0.0742574	1	14480	tags=92%, list=78%, signal=409%	NA
471	MAPK_CASCADE(5)	MAPK_CASCADE(5)	GO:0000165	Details ...	31	-0.235	-1.56176	0.046	0.0753569	1	13059	tags=94%, list=70%, signal=312%	NA
472	NEGATIVE_REGULATION_OF_PROGRAMMED_CELL_DEATH(5)	NEGATIVE_REGULATION_OF_PROGRAMMED_CELL_DEATH(5)	GO:0043069	Details ...	19	-0.296159	-1.55546	0.0487805	0.0773032	1	8217	tags=74%, list=44%, signal=132%	NA
473	REGULATION_OF_PROTEIN_PHOSPHORYLATION(7)	REGULATION_OF_PROTEIN_PHOSPHORYLATION(7)	GO:0001932	Details ...	41	-0.206379	-1.54587	0.0454545	0.0803032	1	14341	tags=98%, list=77%, signal=423%	NA
474	PEPTIDYL_LYSINE_MODIFICATION(8)	PEPTIDYL_LYSINE_MODIFICATION(8)	GO:0018205	Details ...	23	-0.272031	-1.54423	0.048	0.0801973	1	12760	tags=96%, list=68%, signal=303%	NA
475	REGULATION_OF_RESPONSE_TO_STRESS(4)	REGULATION_OF_RESPONSE_TO_STRESS(4)	GO:0080134	Details ...	27	-0.246556	-1.51527	0.0465116	0.0896134	1	12665	tags=93%, list=68%, signal=289%	NA

## Sheet: SiO2vsControl_genes_top20_BPs
Supplementary data 2. Gene ontology enrichment by GSEA
NAME	APOPTOTIC_PROCESS(6)		GENE SYMBOL	GENE_TITLE	RANK IN GENE LIST	RANK METRIC SCORE	RUNNING ES	CORE ENRICHMENT
row_0	185448	Nematode Specific Peptide family, group B	null	null	349	1.4312	-0.0168875	Yes
row_1	188003	hypothetical protein	null	null	532	1.23789	-0.0245967	Yes
row_2	178048	NA	null	null	1041	0.989444	-0.0502229	Yes
row_3	191742	Patterned Expression Site	null	null	1140	0.941678	-0.0533154	Yes
row_4	179919	hypothetical protein	null	null	1190	0.917304	-0.0537149	Yes
row_5	185446	Nematode Specific Peptide family, group B	null	null	1252	0.889603	-0.0547738	Yes
row_6	3564940	Nematode Specific Peptide family, group B	null	null	1354	0.850424	-0.0580312	Yes
row_7	186642	pseudo	null	null	1461	0.802849	-0.0615634	Yes
row_8	187826	Prion-like-(Q/N-rich)-domain-bearing protein	null	null	1582	0.755084	-0.0658651	Yes
row_9	177255	Multiple PDZ domain protein	null	null	1869	0.61505	-0.0792901	Yes
row_10	177066	Uncharacterized protein	null	null	1991	0.578045	-0.0836467	Yes
row_11	3565980	hypothetical protein	null	null	2011	0.568211	-0.0823974	Yes
row_12	172414	ATP-dependent RNA helicase glh-1	null	null	2055	0.555193	-0.0824671	Yes
row_13	3896748	pseudo	null	null	2354	0.454896	-0.0965516	Yes
row_14	180102	hypothetical protein	null	null	2563	0.411235	-0.10569	Yes
row_15	176061	ATP-dependent RNA helicase cgh-1	null	null	2622	0.398946	-0.106584	Yes
row_16	176373	Eukaryotic translation initiation factor 5A	null	null	2624	0.398883	-0.104345	Yes
row_17	172244	Cytoplasmic polyadenylation element-binding protein 3	null	null	2830	0.358643	-0.113319	Yes
row_18	178662	hypothetical protein	null	null	2902	0.343618	-0.114927	Yes
row_19	175007	Caspase A subunit p16	null	null	2969	0.333482	-0.116261	Yes
row_20	188246	Zinc finger In Meiosis	null	null	3014	0.326929	-0.116386	Yes
row_21	172327	PaNtothenate Kinase	null	null	3043	0.321745	-0.115631	Yes
row_22	178950	hypothetical protein	null	null	3091	0.314797	-0.11592	Yes
row_23	175605	ATP Synthase B homolog	null	null	3107	0.312654	-0.114451	Yes
row_24	172617	60S ribosomal protein L23a 2	null	null	3211	0.296892	-0.117819	Yes
row_25	174273	PERMeable eggshell	null	null	3227	0.29511	-0.116349	Yes
row_26	174590	ATPase family AAA domain-containing protein 3	null	null	3252	0.292471	-0.115375	Yes
row_27	172773	SKp1 Related (ubiquitin ligase complex component)	null	null	3273	0.289124	-0.11418	Yes
row_28	179152	GRound-Like (grd related)	null	null	3291	0.287343	-0.112821	Yes
row_29	172361	ATP-dependent RNA helicase glh-2	null	null	3305	0.286322	-0.111242	Yes
row_30	172604	hypothetical protein	null	null	3489	0.261774	-0.119006	Yes
row_31	173158	Cytokinesis, Apoptosis, RNA-associated	null	null	3517	0.258827	-0.118197	Yes
row_32	173224	Valine--tRNA ligase	null	null	3586	0.251013	-0.11964	Yes
row_33	175717	Protein arginine N-methyltransferase 5	null	null	3679	0.23957	-0.122403	Yes
row_34	171938	MSH (MutS Homolog) family	null	null	3683	0.239191	-0.120274	Yes
row_35	188569	pseudo	null	null	3707	0.23698	-0.119245	Yes
row_36	175873	ABC transporter, class F	null	null	3764	0.232492	-0.120029	Yes
row_37	176975	40S ribosomal protein S28	null	null	3766	0.232182	-0.11779	Yes
row_38	189267	CTP synthase	null	null	3873	0.220427	-0.121323	Yes
row_39	177948	Zinc finger In Meiosis	null	null	3879	0.219844	-0.119304	Yes
row_40	3565259	Zinc finger In Meiosis	null	null	4004	0.207634	-0.123825	Yes
row_41	189606	human TORsin related	null	null	4022	0.205961	-0.122466	Yes
row_42	176092	Cytokinesis defective protein 7	null	null	4023	0.20594	-0.120173	Yes
row_43	177406	PUF (Pumilio/FBF) domain-containing	null	null	4036	0.204987	-0.118538	Yes
row_44	172488	Innexin-14	null	null	4065	0.202384	-0.117784	Yes
row_45	178320	PUF (Pumilio/FBF) domain-containing	null	null	4090	0.2008	-0.116809	Yes
row_46	179153	60S ribosomal protein L39	null	null	4221	0.189125	-0.12166	Yes
row_47	176118	Adenylate kinase	null	null	4328	0.180037	-0.125193	Yes
row_48	172442	Asparagine--tRNA ligase, cytoplasmic	null	null	4398	0.174288	-0.126691	Yes
row_49	179508	hypothetical protein	null	null	4597	0.160893	-0.13528	Yes
row_50	174634	Cell-death-Related Nuclease	null	null	4600	0.160772	-0.133096	Yes
row_51	178201	Bloom syndrome protein homolog	null	null	4605	0.16044	-0.131022	Yes
row_52	177285	TachyKinin Receptor family	null	null	4629	0.158988	-0.129993	Yes
row_53	175804	EGG sterile (unfertilizable)	null	null	4632	0.158586	-0.127809	Yes
row_54	174291	DNA-(apurinic or apyrimidinic site) lyase	null	null	4651	0.157258	-0.126505	Yes
row_55	174055	Anillin-like protein 2	null	null	4686	0.154846	-0.12608	Yes
row_56	189618	Probable 28S ribosomal protein S10, mitochondrial	null	null	4766	0.150427	-0.128128	Yes
row_57	172313	40S ribosomal protein S17	null	null	4803	0.147864	-0.127813	Yes
row_58	171693	hypothetical protein	null	null	4864	0.145257	-0.128817	Yes
row_59	188247	High Incidence of Males (increased X chromosome loss)	null	null	4924	0.141509	-0.129766	Yes
row_60	176268	Eukaryotic translation initiation factor 3 subunit D	null	null	4936	0.141016	-0.128077	Yes
row_61	174379	60S ribosomal protein L26	null	null	5008	0.137805	-0.129686	Yes
row_62	173414	MItochondrial Solute Carrier	null	null	5021	0.137238	-0.128052	Yes
row_63	176098	hypothetical protein	null	null	5025	0.137136	-0.125923	Yes
row_64	173689	hypothetical protein	null	null	5040	0.136183	-0.124399	Yes
row_65	172693	40S ribosomal protein S15	null	null	5044	0.136028	-0.12227	Yes
row_66	172901	40S ribosomal protein S7	null	null	5126	0.132434	-0.124429	Yes
row_67	177521	Histone H2A	null	null	5146	0.131135	-0.123179	Yes
row_68	185027	hypothetical protein	null	null	5170	0.130293	-0.12215	Yes
row_69	175819	Chaperonin Containing TCP-1	null	null	5177	0.129919	-0.120186	Yes
row_70	179678	DNA repair protein rad-50	null	null	5184	0.129291	-0.118222	Yes
row_71	171821	Cysteinyl Amino-acyl tRNA Synthetase	null	null	5216	0.127739	-0.117632	Yes
row_72	176361	Tubulin gamma chain	null	null	5228	0.127136	-0.115943	Yes
row_73	172858	Eukaryotic translation initiation factor 3 subunit C	null	null	5277	0.124991	-0.116288	Yes
row_74	176718	Ubiquitin	null	null	5281	0.124843	-0.114159	Yes
row_75	185424	hypothetical protein	null	null	5339	0.121043	-0.114998	Yes
row_76	190051	GCN (yeast General Control Nondrepressible) homolog	null	null	5454	0.115156	-0.11897	Yes
row_77	174677	EGG sterile (unfertilizable)	null	null	5455	0.115131	-0.116677	Yes
row_78	172662	hypothetical protein	null	null	5461	0.114649	-0.114658	Yes
row_79	171949	60S ribosomal protein L13	null	null	5504	0.112829	-0.114673	Yes
row_80	178083	Ribosomal Protein, Small subunit	null	null	5541	0.111453	-0.114358	Yes
row_81	175628	40S ribosomal protein SA	null	null	5544	0.111397	-0.112174	Yes
row_82	191632	ADP-ribosylation factor-like protein 2	null	null	5567	0.110312	-0.111089	Yes
row_83	179274	Germinal Center Kinase family	null	null	5573	0.109834	-0.109071	Yes
row_84	177914	Uncharacterized protein	null	null	5619	0.107886	-0.10925	Yes
row_85	179998	40S ribosomal protein S16	null	null	5620	0.107798	-0.106957	Yes
row_86	178188	40S ribosomal protein S23	null	null	5646	0.106515	-0.106037	Yes
row_87	174431	Mitochondrial import receptor subunit TOM40 homolog	null	null	5686	0.104637	-0.105887	Yes
row_88	172201	60S ribosomal protein L19	null	null	5698	0.104059	-0.104198	Yes
row_89	171692	60S ribosomal protein L17	null	null	5699	0.104017	-0.101904	Yes
row_90	176146	60S ribosomal protein L21	null	null	5740	0.10228	-0.101809	Yes
row_91	173342	40S ribosomal protein S26	null	null	5754	0.101752	-0.10023	Yes
row_92	171809	Eukaryotic Initiation Factor	null	null	5759	0.101691	-0.0981564	Yes
row_93	176668	Probable small nuclear ribonucleoprotein E	null	null	5771	0.101198	-0.0964674	Yes
row_94	175221	ORAI (store-operated calcium channel) homolog	null	null	5793	0.100214	-0.095328	Yes
row_95	177753	26S proteasome non-ATPase regulatory subunit 6	null	null	5801	0.0998181	-0.0934192	Yes
row_96	175853	CYtoKinesis defect	null	null	5804	0.09976	-0.0912355	Yes
row_97	172860	Histone H2A	null	null	5818	0.0991956	-0.0896564	Yes
row_98	190399	Sorting NeXin	null	null	5842	0.0977221	-0.0886269	Yes
row_99	172902	Ribosomal RNA-processing protein 7 homolog	null	null	5857	0.0972852	-0.0871028	Yes
row_100	175096	Histone-lysine N-methyltransferase mes-2	null	null	5872	0.0969649	-0.0855786	Yes
row_101	175499	BRCa homolog (tumor suppressor gene Brca1)	null	null	5893	0.0963425	-0.0843843	Yes
row_102	177503	40S ribosomal protein S8	null	null	5908	0.0959389	-0.0828601	Yes
row_103	177587	Centromere/kinetochore protein zw10 homolog	null	null	5910	0.0958643	-0.0806215	Yes
row_104	176024	Prolyl Amino-acyl tRNA Synthetase	null	null	5911	0.0958313	-0.0783279	Yes
row_105	172943	60S acidic ribosomal protein P0	null	null	5912	0.0958	-0.0760344	Yes
row_106	172508	CHitin Synthase	null	null	5914	0.0957561	-0.0737957	Yes
row_107	176060	Transmembrane matrix receptor MUP-4	null	null	5916	0.0956628	-0.0715571	Yes
row_108	172562	Non-muscle MYosin	null	null	5932	0.094806	-0.0700879	Yes
row_109	172353	M-phase inducer phosphatase cdc-25.1	null	null	5989	0.0927282	-0.0708721	Yes
row_110	183841	URI (Unconventional prefoldin RPB5 Interactor) homolog	null	null	5990	0.0926885	-0.0685786	Yes
row_111	176133	Probable signal peptidase complex subunit 3	null	null	6004	0.0920745	-0.0669995	Yes
row_112	172760	Protein lin-41	null	null	6030	0.0912358	-0.0660799	Yes
row_113	178012	40S ribosomal protein S5	null	null	6034	0.0910857	-0.0639512	Yes
row_114	175413	Ubiquitin-like protein 1	null	null	6048	0.0904832	-0.0623721	Yes
row_115	178945	Cell-death-Related Nuclease	null	null	6082	0.0887503	-0.0618922	Yes
row_116	175879	40S ribosomal protein S3	null	null	6088	0.0885844	-0.0598734	Yes
row_117	3564970	V-type proton ATPase catalytic subunit A	null	null	6093	0.0883668	-0.0577997	Yes
row_118	175545	Mitogen-activated protein kinase mpk-1	null	null	6117	0.0871766	-0.0567702	Yes
row_119	176097	60S ribosomal protein L35	null	null	6126	0.0869265	-0.0549163	Yes
row_120	178483	Small nuclear ribonucleoprotein Sm D3	null	null	6132	0.0866752	-0.0528975	Yes
row_121	179639	Probable small nuclear ribonucleoprotein Sm D2	null	null	6137	0.0865712	-0.0508238	Yes
row_122	172546	Dicer Related Helicase	null	null	6208	0.0839525	-0.0523774	Yes
row_123	181957	hypothetical protein	null	null	6211	0.0838672	-0.0501938	Yes
row_124	176754	Aspergillus NUclear Division related	null	null	6231	0.0833381	-0.0489444	Yes
row_125	171939	human HUS1 related	null	null	6233	0.0833315	-0.0467058	Yes
row_126	185707	SLY1 homolog	null	null	6246	0.0828004	-0.0450718	Yes
row_127	3565661	hypothetical protein	null	null	6258	0.0823664	-0.0433827	Yes
row_128	176103	Probable small nuclear ribonucleoprotein F	null	null	6267	0.0820388	-0.0415288	Yes
row_129	173235	60S ribosomal protein L31	null	null	6288	0.0811683	-0.0403345	Yes
row_130	177678	Phosphoacetylglucosamine mutase	null	null	6300	0.0806436	-0.0386454	Yes
row_131	174425	SET (trithorax/polycomb) domain containing	null	null	6318	0.0799308	-0.0372862	Yes
row_132	179202	Aurora/Ipl1 Related kinase	null	null	6341	0.0791012	-0.0362017	Yes
row_133	174421	T-complex protein 1 subunit beta	null	null	6348	0.0788728	-0.0342379	Yes
row_134	171786	TPX2 (Targeting Protein for Xenopus Klp2)-Like	null	null	6373	0.0777498	-0.0332634	Yes
row_135	176334	Aspartate--tRNA ligase, cytoplasmic	null	null	6387	0.0771432	-0.0316843	Yes
row_136	175584	40S ribosomal protein S3a	null	null	6388	0.0771298	-0.0293907	Yes
row_137	179509	hypothetical protein	null	null	6402	0.0764508	-0.0278116	Yes
row_138	173309	Ribosomal Protein, Small subunit	null	null	6405	0.0761243	-0.025628	Yes
row_139	178279	60S ribosomal protein L12	null	null	6424	0.075563	-0.0243237	Yes
row_140	174699	40S ribosomal protein S9	null	null	6447	0.0749649	-0.0232392	Yes
row_141	172782	Ubiquitin carboxyl-terminal hydrolase	null	null	6465	0.0744337	-0.02188	Yes
row_142	173260	40S ribosomal protein S6	null	null	6484	0.0740051	-0.0205757	Yes
row_143	179537	Eukaryotic Release FActor homolog	null	null	6506	0.0733974	-0.0194362	Yes
row_144	172061	Ribosomal Protein, Small subunit	null	null	6515	0.0732165	-0.0175823	Yes
row_145	176015	60S ribosomal protein L6	null	null	6542	0.0723699	-0.0167177	Yes
row_146	171853	60S ribosomal protein L10a	null	null	6546	0.0721354	-0.014589	Yes
row_147	178943	Proteasome subunit alpha type-1	null	null	6566	0.0715948	-0.0133397	Yes
row_148	172748	Phospholipid-transporting ATPase	null	null	6568	0.0715235	-0.0111011	Yes
row_149	185445	Nematode Specific Peptide family, group B	null	null	6569	0.071501	-0.0088075	Yes
row_150	172320	LiPid Depleted	null	null	6585	0.0709957	-0.00733833	Yes
row_151	180692	Probable V-type proton ATPase subunit B	null	null	6603	0.070446	-0.00597907	Yes
row_152	174330	T-complex protein 1 subunit delta	null	null	6611	0.0702166	-0.00407022	Yes
row_153	175877	26S proteasome non-ATPase regulatory subunit 1	null	null	6643	0.0693335	-0.0034804	Yes
row_154	175861	Glycylpeptide N-tetradecanoyltransferase	null	null	6664	0.0687662	-0.00228603	Yes
row_155	176635	Worm AIF (apoptosis inducing factor) Homolog	null	null	6677	0.0683858	-0.000651972	Yes
row_156	173238	hypothetical protein	null	null	6682	0.0682186	0.00142176	Yes
row_157	172805	40S ribosomal protein S19	null	null	6702	0.0676501	0.0026711	Yes
row_158	183628	Actin-Related Proteins	null	null	6721	0.0670696	0.00397539	Yes
row_159	176196	26S proteasome non-ATPase regulatory subunit 3	null	null	6735	0.0663293	0.00555449	Yes
row_160	179043	fatty Acid CoA Synthetase family	null	null	6819	0.0636895	0.00328638	Yes
row_161	174174	Defective in germ line development protein 3	null	null	6851	0.0626063	0.00387619	Yes
row_162	176891	60S ribosomal protein L15	null	null	6882	0.0619453	0.00452096	Yes
row_163	177455	proteasome Regulatory Particle, Non-ATPase-like	null	null	6889	0.0617024	0.00648478	Yes
row_164	266650	NEDD8-activating enzyme E1 regulatory subunit	null	null	6895	0.061555	0.00850356	Yes
[truncated: 11,314 more rows]

## Sheet: AgvsControl_GOATOOLS
GO	NS	enrichment	name	ratio_in_study	ratio_in_pop	p_uncorrected	depth	study_count	p_fdr_bh	study_items
[truncated: 211 more rows]

[truncated: 3 more sheets: SiO2vsControl_GOATOOLS, AgvsControl_WormExp, SiO2vsControl_WormExp]
