# Supplementary material for: Comprehensive phenotyping and transcriptome profiling to study nanotoxicity in C. elegans
Source: PeerJ. 2020 Feb 27;8:e8684. doi: 10.7717/peerj.8684 (PMC7049462; doi:10.7717/peerj.8684)
Supplement: Data S3 — Enriched biological pathways showing up- and down-regulation patterns are shown for the Ag and SiO2 groups (P < 0.05). Genes with description for the top 20 enriched biological pathways are provided. [file peerj-08-8684-s005.xlsx]

## Sheet: AgvsControl
Supplementary data 3. KEGG pathway enrichment by GSEA
Positive NES	NAME	GS<br> follow link to MSigDB	GS DETAILS	SIZE	ES	NES	NOM p-val	FDR q-val	FWER p-val	RANK AT MAX	LEADING EDGE
1	RIBOSOME	RIBOSOME	Details ...	126	0.542161	7.17936	0	0	0	7253	tags=93%, list=39%, signal=151%
2	PROTEASOME	PROTEASOME	Details ...	41	0.613635	4.73053	0	0	0	7209	tags=100%, list=39%, signal=163%
3	RNA TRANSPORT	RNA TRANSPORT	Details ...	116	0.368085	4.48445	0	0	0	10350	tags=92%, list=56%, signal=207%
4	SPLICEOSOME	SPLICEOSOME	Details ...	111	0.35906	4.45278	0	0	0	10450	tags=92%, list=56%, signal=209%
5	OXIDATIVE PHOSPHORYLATION	OXIDATIVE PHOSPHORYLATION	Details ...	109	0.363107	4.31994	0	0	0	10688	tags=94%, list=57%, signal=219%
6	AMINOACYL-TRNA BIOSYNTHESIS	AMINOACYL-TRNA BIOSYNTHESIS	Details ...	38	0.544126	4.07815	0	0	0	7029	tags=92%, list=38%, signal=148%
7	RIBOSOME BIOGENESIS IN EUKARYOTES	RIBOSOME BIOGENESIS IN EUKARYOTES	Details ...	60	0.399773	3.66078	0	0	0	10255	tags=95%, list=55%, signal=211%
8	NUCLEOTIDE EXCISION REPAIR	NUCLEOTIDE EXCISION REPAIR	Details ...	37	0.507819	3.64258	0	0	0	7160	tags=89%, list=39%, signal=145%
9	CARBON METABOLISM	CARBON METABOLISM	Details ...	108	0.283277	3.45781	0	0	0	10775	tags=86%, list=58%, signal=204%
10	GLYCOSYLPHOSPHATIDYLINOSITOL (GPI)-ANCHOR BIOSYNTHESIS	GLYCOSYLPHOSPHATIDYLINOSITOL (GPI)-ANCHOR BIOSYNTHESIS	Details ...	16	0.684822	3.34945	0	0	0	5871	tags=100%, list=32%, signal=146%
11	FANCONI ANEMIA PATHWAY	FANCONI ANEMIA PATHWAY	Details ...	25	0.55899	3.32955	0	0	0	8214	tags=100%, list=44%, signal=179%
12	DNA REPLICATION	DNA REPLICATION	Details ...	35	0.471078	3.3158	0	0	0	9320	tags=97%, list=50%, signal=194%
13	PYRIMIDINE METABOLISM	PYRIMIDINE METABOLISM	Details ...	72	0.325614	3.14099	0	0	0	9464	tags=83%, list=51%, signal=169%
14	RNA POLYMERASE	RNA POLYMERASE	Details ...	25	0.504236	3.02077	0	0	0	8487	tags=96%, list=46%, signal=176%
15	MRNA SURVEILLANCE PATHWAY	MRNA SURVEILLANCE PATHWAY	Details ...	69	0.299559	2.92556	0	0	0	10350	tags=86%, list=56%, signal=192%
16	ENDOCYTOSIS	ENDOCYTOSIS	Details ...	104	0.240378	2.83962	0	0	0	11289	tags=85%, list=61%, signal=214%
17	RNA DEGRADATION	RNA DEGRADATION	Details ...	49	0.348948	2.81627	0	0	0	9846	tags=88%, list=53%, signal=186%
18	MISMATCH REPAIR	MISMATCH REPAIR	Details ...	18	0.532236	2.76218	0	0	0	7674	tags=94%, list=41%, signal=161%
19	HOMOLOGOUS RECOMBINATION	HOMOLOGOUS RECOMBINATION	Details ...	20	0.520026	2.74652	0	0	0	8935	tags=100%, list=48%, signal=192%
20	PEROXISOME	PEROXISOME	Details ...	76	0.26172	2.69883	0	6.74e-05	0.001	9833	tags=79%, list=53%, signal=167%
21	BASAL TRANSCRIPTION FACTORS	BASAL TRANSCRIPTION FACTORS	Details ...	36	0.378107	2.66257	0	6.42e-05	0.001	8478	tags=83%, list=46%, signal=153%
22	FATTY ACID METABOLISM	FATTY ACID METABOLISM	Details ...	57	0.290513	2.58743	0	0.000119	0.002	7663	tags=70%, list=41%, signal=119%
23	BIOSYNTHESIS OF AMINO ACIDS	BIOSYNTHESIS OF AMINO ACIDS	Details ...	72	0.252837	2.58571	0	0.000114	0.002	9779	tags=78%, list=53%, signal=163%
24	PROTEIN PROCESSING IN ENDOPLASMIC RETICULUM	PROTEIN PROCESSING IN ENDOPLASMIC RETICULUM	Details ...	134	0.186583	2.51614	0	0.000486	0.008	12236	tags=84%, list=66%, signal=245%
25	BASE EXCISION REPAIR	BASE EXCISION REPAIR	Details ...	16	0.517546	2.50337	0	0.000467	0.008	8979	tags=100%, list=48%, signal=193%
26	TERPENOID BACKBONE BIOSYNTHESIS	TERPENOID BACKBONE BIOSYNTHESIS	Details ...	17	0.497181	2.45351	0	0.00066	0.012	8264	tags=94%, list=44%, signal=169%
27	N-GLYCAN BIOSYNTHESIS	N-GLYCAN BIOSYNTHESIS	Details ...	37	0.326009	2.38132	0	0.00116496	0.021	12042	tags=97%, list=65%, signal=276%
28	PYRUVATE METABOLISM	PYRUVATE METABOLISM	Details ...	29	0.35197	2.28968	0	0.00224187	0.042	9495	tags=86%, list=51%, signal=176%
29	PENTOSE PHOSPHATE PATHWAY	PENTOSE PHOSPHATE PATHWAY	Details ...	20	0.431772	2.26562	0	0.00275558	0.054	7785	tags=85%, list=42%, signal=146%
30	CITRATE CYCLE (TCA CYCLE)	CITRATE CYCLE (TCA CYCLE)	Details ...	33	0.316651	2.19653	0	0.00475195	0.095	12717	tags=100%, list=68%, signal=316%
31	FATTY ACID DEGRADATION	FATTY ACID DEGRADATION	Details ...	51	0.256247	2.1913	0	0.00473414	0.098	9832	tags=78%, list=53%, signal=166%
32	PURINE METABOLISM	PURINE METABOLISM	Details ...	109	0.182108	2.17265	0.00612245	0.00510752	0.108	9769	tags=71%, list=53%, signal=148%
33	CYSTEINE AND METHIONINE METABOLISM	CYSTEINE AND METHIONINE METABOLISM	Details ...	39	0.293792	2.14241	0.00206612	0.00611174	0.131	10759	tags=87%, list=58%, signal=206%
34	GLYCOLYSIS / GLUCONEOGENESIS	GLYCOLYSIS / GLUCONEOGENESIS	Details ...	41	0.282684	2.12511	0	0.00677365	0.148	11082	tags=88%, list=60%, signal=217%
35	PROTEIN EXPORT	PROTEIN EXPORT	Details ...	22	0.376749	2.07153	0.00390625	0.00898922	0.193	10752	tags=95%, list=58%, signal=226%
36	BUTANOATE METABOLISM	BUTANOATE METABOLISM	Details ...	19	0.388454	2.04752	0.00963391	0.0102586	0.223	6485	tags=74%, list=35%, signal=113%
37	FATTY ACID ELONGATION	FATTY ACID ELONGATION	Details ...	24	0.342666	2.01972	0.00790514	0.011629	0.253	7582	tags=75%, list=41%, signal=126%
38	GLYOXYLATE AND DICARBOXYLATE METABOLISM	GLYOXYLATE AND DICARBOXYLATE METABOLISM	Details ...	37	0.271612	1.96295	0.00393701	0.0154573	0.332	10036	tags=81%, list=54%, signal=176%
39	NON-HOMOLOGOUS END-JOINING	NON-HOMOLOGOUS END-JOINING	Details ...	6	0.628761	1.92823	0.00387597	0.0186108	0.384	3807	tags=83%, list=20%, signal=105%
40	STARCH AND SUCROSE METABOLISM	STARCH AND SUCROSE METABOLISM	Details ...	17	0.388893	1.91864	0.00954198	0.0194404	0.411	9182	tags=88%, list=49%, signal=174%
41	ARGININE BIOSYNTHESIS	ARGININE BIOSYNTHESIS	Details ...	17	0.391302	1.89599	0.0151229	0.0215175	0.447	11325	tags=100%, list=61%, signal=256%
42	GLYCOSAMINOGLYCAN BIOSYNTHESIS - CHONDROITIN SULFATE / DERMATAN SULFATE	GLYCOSAMINOGLYCAN BIOSYNTHESIS - CHONDROITIN SULFATE / DERMATAN SULFATE	Details ...	6	0.629855	1.89108	0.010395	0.0216742	0.458	6886	tags=100%, list=37%, signal=159%
43	VALINE, LEUCINE AND ISOLEUCINE DEGRADATION	VALINE, LEUCINE AND ISOLEUCINE DEGRADATION	Details ...	51	0.231738	1.88707	0.0163599	0.0215474	0.465	8828	tags=71%, list=47%, signal=134%
44	MTOR SIGNALING PATHWAY	MTOR SIGNALING PATHWAY	Details ...	78	0.179219	1.8867	0.00976562	0.0211212	0.466	14561	tags=96%, list=78%, signal=441%
45	UBIQUITIN MEDIATED PROTEOLYSIS	UBIQUITIN MEDIATED PROTEOLYSIS	Details ...	86	0.177935	1.86264	0.0114286	0.0232714	0.505	11193	tags=78%, list=60%, signal=195%
46	INOSITOL PHOSPHATE METABOLISM	INOSITOL PHOSPHATE METABOLISM	Details ...	34	0.271202	1.86142	0.0169492	0.0229644	0.506	13014	tags=97%, list=70%, signal=323%
47	AMINO SUGAR AND NUCLEOTIDE SUGAR METABOLISM	AMINO SUGAR AND NUCLEOTIDE SUGAR METABOLISM	Details ...	35	0.262552	1.81362	0.0159363	0.0293676	0.615	7346	tags=66%, list=40%, signal=108%
48	PHENYLALANINE METABOLISM	PHENYLALANINE METABOLISM	Details ...	11	0.428704	1.79277	0.011583	0.0319618	0.657	8937	tags=91%, list=48%, signal=175%
49	PROPANOATE METABOLISM	PROPANOATE METABOLISM	Details ...	29	0.276512	1.79264	0.0140281	0.0313095	0.657	13461	tags=100%, list=72%, signal=362%
50	SYNTHESIS AND DEGRADATION OF KETONE BODIES	SYNTHESIS AND DEGRADATION OF KETONE BODIES	Details ...	5	0.654833	1.7759	0.0203666	0.0339141	0.692	6421	tags=100%, list=35%, signal=153%
51	SNARE INTERACTIONS IN VESICULAR TRANSPORT	SNARE INTERACTIONS IN VESICULAR TRANSPORT	Details ...	25	0.292131	1.7354	0.0169492	0.0410821	0.766	12426	tags=96%, list=67%, signal=289%
52	2-OXOCARBOXYLIC ACID METABOLISM	2-OXOCARBOXYLIC ACID METABOLISM	Details ...	19	0.323306	1.7069	0.0157791	0.0466044	0.814	8674	tags=79%, list=47%, signal=148%
53	BIOSYNTHESIS OF UNSATURATED FATTY ACIDS	BIOSYNTHESIS OF UNSATURATED FATTY ACIDS	Details ...	21	0.304998	1.66984	0.0426357	0.054788	0.857	6731	tags=67%, list=36%, signal=104%
54	FATTY ACID BIOSYNTHESIS	FATTY ACID BIOSYNTHESIS	Details ...	13	0.389641	1.65777	0.0374016	0.0575185	0.872	4202	tags=62%, list=23%, signal=79%
55	SULFUR RELAY SYSTEM	SULFUR RELAY SYSTEM	Details ...	10	0.422791	1.65425	0.0328185	0.0576585	0.878	10737	tags=100%, list=58%, signal=236%
56	SELENOCOMPOUND METABOLISM	SELENOCOMPOUND METABOLISM	Details ...	14	0.365054	1.65111	0.0261044	0.0575888	0.884	9155	tags=86%, list=49%, signal=169%
57	LONGEVITY REGULATING PATHWAY - WORM	LONGEVITY REGULATING PATHWAY - WORM	Details ...	68	0.166092	1.62329	0.0258449	0.0655291	0.928	12236	tags=82%, list=66%, signal=240%
58	THIAMINE METABOLISM	THIAMINE METABOLISM	Details ...	6	0.519312	1.59103	0.044898	0.075276	0.952	8941	tags=100%, list=48%, signal=193%
59	PHENYLALANINE, TYROSINE AND TRYPTOPHAN BIOSYNTHESIS	PHENYLALANINE, TYROSINE AND TRYPTOPHAN BIOSYNTHESIS	Details ...	5	0.533645	1.50908	0.0462428	0.104942	0.988	8674	tags=100%, list=47%, signal=187%
Negative NES	NAME	GS<br> follow link to MSigDB	GS DETAILS	SIZE	ES	NES	NOM p-val	FDR q-val	FWER p-val	RANK AT MAX	LEADING EDGE
1	NEUROACTIVE LIGAND-RECEPTOR INTERACTION	NEUROACTIVE LIGAND-RECEPTOR INTERACTION	Details ...	31	-0.379001	-2.4904	0	0.00641211	0.011	6162	tags=71%, list=33%, signal=106%
2	WNT SIGNALING PATHWAY	WNT SIGNALING PATHWAY	Details ...	73	-0.238089	-2.34993	0.00199203	0.0080399	0.028	11130	tags=84%, list=60%, signal=207%
3	LYSOSOME	LYSOSOME	Details ...	98	-0.1915	-2.19883	0.00209205	0.0155758	0.082	10121	tags=73%, list=54%, signal=160%
4	ECM-RECEPTOR INTERACTION	ECM-RECEPTOR INTERACTION	Details ...	8	-0.635195	-2.17992	0.00204918	0.0130348	0.091	6790	tags=100%, list=37%, signal=157%
5	PHAGOSOME	PHAGOSOME	Details ...	60	-0.231923	-2.11803	0.006	0.0154817	0.135	9959	tags=77%, list=54%, signal=165%
6	MAPK SIGNALING PATHWAY	MAPK SIGNALING PATHWAY	Details ...	75	-0.195789	-1.97332	0.00595238	0.0327376	0.303	13979	tags=95%, list=75%, signal=380%
7	CALCIUM SIGNALING PATHWAY	CALCIUM SIGNALING PATHWAY	Details ...	58	-0.210423	-1.92113	0.00824742	0.0386663	0.395	8925	tags=69%, list=48%, signal=132%
8	DRUG METABOLISM - CYTOCHROME P450	DRUG METABOLISM - CYTOCHROME P450	Details ...	45	-0.229855	-1.87202	0.0116959	0.0456978	0.494	11027	tags=82%, list=59%, signal=202%
9	AUTOPHAGY - ANIMAL	AUTOPHAGY - ANIMAL	Details ...	85	-0.159965	-1.72633	0.0150538	0.0893966	0.79	14542	tags=94%, list=78%, signal=430%
10	AGE-RAGE SIGNALING PATHWAY IN DIABETIC COMPLICATIONS	AGE-RAGE SIGNALING PATHWAY IN DIABETIC COMPLICATIONS	Details ...	28	-0.271742	-1.71259	0.0178218	0.0861447	0.817	12223	tags=93%, list=66%, signal=271%
11	TGF-BETA SIGNALING PATHWAY	TGF-BETA SIGNALING PATHWAY	Details ...	39	-0.226432	-1.66685	0.0374753	0.10028	0.879	12011	tags=87%, list=65%, signal=246%
12	GLYCOSPHINGOLIPID BIOSYNTHESIS - GLOBO AND ISOGLOBO SERIES	GLYCOSPHINGOLIPID BIOSYNTHESIS - GLOBO AND ISOGLOBO SERIES	Details ...	2	-0.853716	-1.59311	0.0466102	0.119502	0.95	2723	tags=100%, list=15%, signal=117%
13	ERBB SIGNALING PATHWAY	ERBB SIGNALING PATHWAY	Details ...	38	-0.216675	-1.59003	0.048	0.112802	0.954	10661	tags=79%, list=57%, signal=185%
14	POLYKETIDE SUGAR UNIT BIOSYNTHESIS	POLYKETIDE SUGAR UNIT BIOSYNTHESIS	Details ...	2	-0.858556	-1.58925	0.0288066	0.105919	0.954	2633	tags=100%, list=14%, signal=116%
15	TAURINE AND HYPOTAURINE METABOLISM*	TAURINE AND HYPOTAURINE METABOLISM	Details ...	6	-0.519849	-1.60083	0.0557769	0.12443	0.941	8933	tags=100%, list=48%, signal=192%
16	GLYCOSAMINOGLYCAN DEGRADATION*	GLYCOSAMINOGLYCAN DEGRADATION	Details ...	5	-0.566295	-1.57849	0.0574257	0.104221	0.965	8069	tags=100%, list=43%, signal=177%
17	AUTOPHAGY - OTHER*	AUTOPHAGY - OTHER	Details ...	24	-0.249488	-1.44971	0.084	0.177365	0.996	11639	tags=88%, list=63%, signal=234%
18	HIPPO SIGNALING PATHWAY -MULTIPLE SPECIES*	HIPPO SIGNALING PATHWAY -MULTIPLE SPECIES	Details ...	13	-0.325467	-1.43266	0.105364	0.180228	0.997	6827	tags=69%, list=37%, signal=109%
19	RETINOL METABOLISM*	RETINOL METABOLISM	Details ...	22	-0.252259	-1.41346	0.0962672	0.184922	0.998	12221	tags=91%, list=66%, signal=265%
20	MITOPHAGY - ANIMAL*	MITOPHAGY - ANIMAL	Details ...	29	-0.213876	-1.37596	0.126233	0.205247	1	12061	tags=86%, list=65%, signal=245%
	*: 0.05 < P < 0.13; 0.12 < FDR < 0.21

## Sheet: SiO2vsControl
Supplementary data 3. KEGG pathway enrichment by GSEA
Positive NES	NAME	GS<br> follow link to MSigDB	GS DETAILS	SIZE	ES	NES	NOM p-val	FDR q-val	FWER p-val	RANK AT MAX	LEADING EDGE
1	RIBOSOME	RIBOSOME	Details ...	126	0.509582	6.86409	0	0	0	8313	tags=95%, list=45%, signal=171%
2	PROTEASOME	PROTEASOME	Details ...	41	0.495459	3.68211	0	0	0	8965	tags=98%, list=48%, signal=188%
3	AMINOACYL-TRNA BIOSYNTHESIS	AMINOACYL-TRNA BIOSYNTHESIS	Details ...	38	0.449116	3.29635	0	0	0	9299	tags=95%, list=50%, signal=189%
4	OXIDATIVE PHOSPHORYLATION	OXIDATIVE PHOSPHORYLATION	Details ...	109	0.241432	2.9863	0	0	0	12278	tags=90%, list=66%, signal=262%
5	CARBON METABOLISM	CARBON METABOLISM	Details ...	108	0.242012	2.96931	0	0	0	10352	tags=80%, list=56%, signal=178%
6	RNA TRANSPORT	RNA TRANSPORT	Details ...	116	0.231727	2.95512	0	0	0	12091	tags=88%, list=65%, signal=249%
7	PYRUVATE METABOLISM	PYRUVATE METABOLISM	Details ...	29	0.424446	2.7244	0	0.000182	0.001	10092	tags=97%, list=54%, signal=210%
8	RNA POLYMERASE	RNA POLYMERASE	Details ...	25	0.405972	2.43873	0	0.00256983	0.016	9586	tags=92%, list=51%, signal=189%
9	FANCONI ANEMIA PATHWAY	FANCONI ANEMIA PATHWAY	Details ...	25	0.395533	2.33731	0	0.00426483	0.028	9035	tags=88%, list=48%, signal=171%
10	RIBOSOME BIOGENESIS IN EUKARYOTES	RIBOSOME BIOGENESIS IN EUKARYOTES	Details ...	60	0.259235	2.33264	0	0.0039696	0.029	9158	tags=75%, list=49%, signal=147%
11	FATTY ACID METABOLISM	FATTY ACID METABOLISM	Details ...	57	0.249595	2.27975	0	0.00601172	0.049	11706	tags=88%, list=63%, signal=235%
12	NUCLEOTIDE EXCISION REPAIR	NUCLEOTIDE EXCISION REPAIR	Details ...	37	0.300841	2.16978	0	0.0115115	0.102	11022	tags=89%, list=59%, signal=218%
13	PYRIMIDINE METABOLISM	PYRIMIDINE METABOLISM	Details ...	72	0.215903	2.16916	0.00196464	0.010823	0.104	13588	tags=94%, list=73%, signal=348%
14	FATTY ACID DEGRADATION	FATTY ACID DEGRADATION	Details ...	51	0.254689	2.16041	0.00196078	0.0108891	0.112	11706	tags=88%, list=63%, signal=237%
15	RNA DEGRADATION	RNA DEGRADATION	Details ...	49	0.262099	2.15695	0.00416667	0.0105813	0.117	12619	tags=94%, list=68%, signal=290%
16	VALINE, LEUCINE AND ISOLEUCINE DEGRADATION	VALINE, LEUCINE AND ISOLEUCINE DEGRADATION	Details ...	51	0.25489	2.14412	0.00385357	0.0105602	0.123	10241	tags=80%, list=55%, signal=178%
17	BIOSYNTHESIS OF AMINO ACIDS	BIOSYNTHESIS OF AMINO ACIDS	Details ...	72	0.211656	2.13999	0.00394477	0.01002	0.124	12373	tags=88%, list=66%, signal=259%
18	GLYCOSYLPHOSPHATIDYLINOSITOL (GPI)-ANCHOR BIOSYNTHESIS	GLYCOSYLPHOSPHATIDYLINOSITOL (GPI)-ANCHOR BIOSYNTHESIS	Details ...	16	0.433152	2.08729	0.00606061	0.0136726	0.174	8238	tags=88%, list=44%, signal=157%
19	DNA REPLICATION	DNA REPLICATION	Details ...	35	0.288398	2.06646	0.00412371	0.0146576	0.195	11670	tags=91%, list=63%, signal=244%
20	GLYCOLYSIS / GLUCONEOGENESIS	GLYCOLYSIS / GLUCONEOGENESIS	Details ...	41	0.274185	2.06493	0.00431035	0.0141376	0.197	10352	tags=83%, list=56%, signal=186%
21	PURINE METABOLISM	PURINE METABOLISM	Details ...	107	0.166719	2.06105	0.00194932	0.01377	0.202	13104	tags=87%, list=70%, signal=291%
22	PEROXISOME	PEROXISOME	Details ...	76	0.201408	2.01805	0.002079	0.0178152	0.271	11706	tags=83%, list=63%, signal=222%
23	MTOR SIGNALING PATHWAY	MTOR SIGNALING PATHWAY	Details ...	78	0.196879	2.01589	0.006	0.0172177	0.273	13783	tags=94%, list=74%, signal=358%
24	AMINO SUGAR AND NUCLEOTIDE SUGAR METABOLISM	AMINO SUGAR AND NUCLEOTIDE SUGAR METABOLISM	Details ...	35	0.273848	1.95728	0.0059761	0.0229427	0.362	9279	tags=77%, list=50%, signal=153%
25	SYNTHESIS AND DEGRADATION OF KETONE BODIES	SYNTHESIS AND DEGRADATION OF KETONE BODIES	Details ...	5	0.690755	1.92231	0.00400802	0.0266395	0.424	5764	tags=100%, list=31%, signal=145%
26	ARGININE AND PROLINE METABOLISM	ARGININE AND PROLINE METABOLISM	Details ...	26	0.312242	1.9056	0.00809717	0.0282528	0.451	10671	tags=88%, list=57%, signal=207%
27	MISMATCH REPAIR	MISMATCH REPAIR	Details ...	18	0.368769	1.85072	0.0182186	0.0359296	0.545	9696	tags=89%, list=52%, signal=185%
28	MANNOSE TYPE O-GLYCAN BIOSYNTHESIS	MANNOSE TYPE O-GLYCAN BIOSYNTHESIS	Details ...	8	0.523654	1.81013	0.0147679	0.042885	0.618	8878	tags=100%, list=48%, signal=191%
29	BIOSYNTHESIS OF UNSATURATED FATTY ACIDS	BIOSYNTHESIS OF UNSATURATED FATTY ACIDS	Details ...	21	0.324385	1.80209	0.0145228	0.0435939	0.637	11706	tags=95%, list=63%, signal=256%
30	HOMOLOGOUS RECOMBINATION	HOMOLOGOUS RECOMBINATION	Details ...	20	0.331812	1.7943	0.0149893	0.044133	0.652	9660	tags=85%, list=52%, signal=176%
31	GLYOXYLATE AND DICARBOXYLATE METABOLISM	GLYOXYLATE AND DICARBOXYLATE METABOLISM	Details ...	37	0.247627	1.78531	0.0230326	0.0446251	0.667	12515	tags=92%, list=67%, signal=279%
32	SULFUR METABOLISM	SULFUR METABOLISM	Details ...	14	0.39317	1.77096	0.0234834	0.0461435	0.689	7318	tags=79%, list=39%, signal=129%
33	BUTANOATE METABOLISM	BUTANOATE METABOLISM	Details ...	19	0.322477	1.71719	0.0296443	0.0600331	0.795	5764	tags=63%, list=31%, signal=91%
34	LONGEVITY REGULATING PATHWAY - WORM	LONGEVITY REGULATING PATHWAY - WORM	Details ...	68	0.183596	1.71085	0.0386266	0.0603108	0.804	13578	tags=91%, list=73%, signal=335%
35	TERPENOID BACKBONE BIOSYNTHESIS	TERPENOID BACKBONE BIOSYNTHESIS	Details ...	17	0.350227	1.70964	0.0220884	0.0589493	0.805	9919	tags=88%, list=53%, signal=189%
36	N-GLYCAN BIOSYNTHESIS	N-GLYCAN BIOSYNTHESIS	Details ...	37	0.240156	1.70629	0.0259481	0.0584787	0.809	13661	tags=97%, list=73%, signal=364%
37	NON-HOMOLOGOUS END-JOINING	NON-HOMOLOGOUS END-JOINING	Details ...	6	0.557154	1.69546	0.0313725	0.0600768	0.825	8253	tags=100%, list=44%, signal=179%
38	GLYCEROPHOSPHOLIPID METABOLISM	GLYCEROPHOSPHOLIPID METABOLISM	Details ...	56	0.193718	1.68289	0.0368217	0.0621826	0.85	14699	tags=98%, list=79%, signal=464%
39	GLYCEROLIPID METABOLISM	GLYCEROLIPID METABOLISM	Details ...	32	0.246997	1.66728	0.0268595	0.0662058	0.87	11125	tags=84%, list=60%, signal=209%
40	FRUCTOSE AND MANNOSE METABOLISM	FRUCTOSE AND MANNOSE METABOLISM	Details ...	20	0.310247	1.64057	0.0441767	0.0735887	0.901	12856	tags=100%, list=69%, signal=322%
41	BASE EXCISION REPAIR	BASE EXCISION REPAIR	Details ...	16	0.331184	1.60254	0.0431211	0.0851341	0.935	12465	tags=100%, list=67%, signal=302%
Negative NES	NAME	GS<br> follow link to MSigDB	GS DETAILS	SIZE	ES	NES	NOM p-val	FDR q-val	FWER p-val	RANK AT MAX	LEADING EDGE
1	PROTEIN PROCESSING IN ENDOPLASMIC RETICULUM	PROTEIN PROCESSING IN ENDOPLASMIC RETICULUM	Details ...	134	-0.28738	-3.89559	0	0	0	12065	tags=93%, list=65%, signal=263%
2	ENDOCYTOSIS	ENDOCYTOSIS	Details ...	104	-0.279954	-3.37433	0	0	0	13087	tags=98%, list=70%, signal=328%
3	SPLICEOSOME	SPLICEOSOME	Details ...	111	-0.264458	-3.29783	0	0	0	12895	tags=95%, list=69%, signal=308%
4	WNT SIGNALING PATHWAY	WNT SIGNALING PATHWAY	Details ...	74	-0.31885	-3.19883	0	0	0	8435	tags=77%, list=45%, signal=140%
5	UBIQUITIN MEDIATED PROTEOLYSIS	UBIQUITIN MEDIATED PROTEOLYSIS	Details ...	86	-0.259632	-2.84866	0	0	0	12084	tags=91%, list=65%, signal=257%
6	TGF-BETA SIGNALING PATHWAY	TGF-BETA SIGNALING PATHWAY	Details ...	39	-0.368598	-2.78155	0	0.000244	0.002	8435	tags=82%, list=45%, signal=150%
7	MRNA SURVEILLANCE PATHWAY	MRNA SURVEILLANCE PATHWAY	Details ...	69	-0.279225	-2.7376	0	0.000324	0.003	12909	tags=97%, list=69%, signal=315%
8	MAPK SIGNALING PATHWAY	MAPK SIGNALING PATHWAY	Details ...	76	-0.253708	-2.6004	0.0019802	0.000558	0.006	11473	tags=87%, list=62%, signal=225%
9	CALCIUM SIGNALING PATHWAY	CALCIUM SIGNALING PATHWAY	Details ...	58	-0.24773	-2.24805	0.00203666	0.0042727	0.05	9855	tags=78%, list=53%, signal=164%
10	ECM-RECEPTOR INTERACTION	ECM-RECEPTOR INTERACTION	Details ...	8	-0.597064	-2.07732	0.00204918	0.0125531	0.161	5184	tags=88%, list=28%, signal=121%
11	PHOSPHATIDYLINOSITOL SIGNALING SYSTEM	PHOSPHATIDYLINOSITOL SIGNALING SYSTEM	Details ...	47	-0.258501	-2.06845	0.00787402	0.0124904	0.174	11846	tags=89%, list=64%, signal=245%
12	NOTCH SIGNALING PATHWAY	NOTCH SIGNALING PATHWAY	Details ...	19	-0.364533	-1.95091	0.00399202	0.0243341	0.333	7925	tags=79%, list=43%, signal=137%
13	AUTOPHAGY - OTHER	AUTOPHAGY - OTHER	Details ...	24	-0.342904	-1.94624	0.00798403	0.0229641	0.335	10699	tags=92%, list=57%, signal=215%
14	HIPPO SIGNALING PATHWAY -MULTIPLE SPECIES	HIPPO SIGNALING PATHWAY -MULTIPLE SPECIES	Details ...	13	-0.431286	-1.9127	0.0125261	0.0256274	0.386	7736	tags=85%, list=42%, signal=145%
15	AUTOPHAGY - ANIMAL	AUTOPHAGY - ANIMAL	Details ...	85	-0.171023	-1.86633	0.0101215	0.0320174	0.475	11734	tags=80%, list=63%, signal=215%
16	INOSITOL PHOSPHATE METABOLISM	INOSITOL PHOSPHATE METABOLISM	Details ...	34	-0.263325	-1.83927	0.0100402	0.0357807	0.528	12639	tags=94%, list=68%, signal=292%
17	NEUROACTIVE LIGAND-RECEPTOR INTERACTION	NEUROACTIVE LIGAND-RECEPTOR INTERACTION	Details ...	31	-0.274301	-1.82777	0.0177515	0.0353292	0.55	8722	tags=74%, list=47%, signal=139%
18	PHAGOSOME	PHAGOSOME	Details ...	61	-0.196532	-1.81573	0.0142857	0.035839	0.579	12539	tags=87%, list=67%, signal=265%
19	MITOPHAGY - ANIMAL	MITOPHAGY - ANIMAL	Details ...	29	-0.281164	-1.80361	0.026975	0.0364479	0.607	10832	tags=86%, list=58%, signal=206%
20	BASAL TRANSCRIPTION FACTORS	BASAL TRANSCRIPTION FACTORS	Details ...	36	-0.234149	-1.69996	0.0421687	0.0618271	0.828	14278	tags=100%, list=77%, signal=427%
21	AGE-RAGE SIGNALING PATHWAY IN DIABETIC COMPLICATIONS	AGE-RAGE SIGNALING PATHWAY IN DIABETIC COMPLICATIONS	Details ...	29	-0.235757	-1.54831	0.0497018	0.12	0.975	13604	tags=97%, list=73%, signal=357%

## Sheet: AgvsControl_genes_for_top20
Supplementary data 3. KEGG pathway enrichment by GSEA
NAME	AGE-RAGE SIGNALING PATHWAY IN DIABETIC COMPLICATIONS	Description	GENE SYMBOL	GENE_TITLE	RANK IN GENE LIST	RANK METRIC SCORE	RUNNING ES	CORE ENRICHMENT
row_0	172141	phosphoinositide kinase AdAPter subunit	null	null	3678	0.330585	-0.162368	No
row_1	174762	Phosphatidylinositol 3-kinase age-1	null	null	4123	0.290831	-0.150566	No
row_2	177525	Phosphoinositide phospholipase C	null	null	6374	0.146599	-0.236028	Yes
row_3	175545	Mitogen-activated protein kinase mpk-1	null	null	6586	0.135949	-0.211678	Yes
row_4	174233	Cell division control protein 42 homolog	null	null	7600	0.0789491	-0.230519	Yes
row_5	179424	Serine/threonine-protein kinase akt-1	null	null	8035	0.0562733	-0.218179	Yes
row_6	179649	Protein kinase C	null	null	8632	0.0215094	-0.214563	Yes
row_7	191169	Mitogen-activated protein kinase	null	null	9074	-0.00621454	-0.202599	Yes
row_8	178537	1-phosphatidylinositol 4,5-bisphosphate phosphodiesterase beta egl-8	null	null	9672	-0.0492959	-0.199037	Yes
row_9	179462	Cdc-42 Related Protein	null	null	9675	-0.0494794	-0.16343	Yes
row_10	175815	Dwarfin sma-4	null	null	10018	-0.0739556	-0.146135	Yes
row_11	176866	GLH-binding kinase 1	null	null	10179	-0.0839972	-0.119037	Yes
row_12	181580	EGR (Early Growth factor Response factor) Homolog	null	null	10222	-0.0870331	-0.085585	Yes
row_13	181166	Protein kinase C	null	null	10302	-0.0929225	-0.0541254	Yes
row_14	177111	Ras-related protein ced-10	null	null	10541	-0.110597	-0.0312288	Yes
row_15	178104	Ras protein let-60	null	null	10559	-0.111544	0.00356992	Yes
row_16	177610	Mitogen-activated protein kinase pmk-3	null	null	10958	-0.139774	0.0178495	Yes
row_17	174586	1-phosphatidylinositol 4,5-bisphosphate phosphodiesterase gamma plc-3	null	null	11035	-0.145261	0.0494707	Yes
row_18	191743	Mitogen-activated protein kinase pmk-1	null	null	11068	-0.147349	0.0834616	Yes
row_19	181344	hypothetical protein	null	null	11241	-0.159057	0.109913	Yes
row_20	178465	Signal transducer and activator of transcription 1	null	null	11920	-0.205957	0.109112	Yes
row_21	177611	Mitogen-activated protein kinase	null	null	11963	-0.208312	0.142565	Yes
row_22	181274	1-phosphatidylinositol 4,5-bisphosphate phosphodiesterase epsilon-1	null	null	13014	-0.278432	0.12173	Yes
row_23	176825	Protein kinase C-like 1	null	null	13123	-0.284465	0.151628	Yes
row_24	181708	Collagen alpha-2(IV) chain	null	null	13327	-0.298454	0.17641	Yes
row_25	181524	Serine/threonine-protein kinase akt-2	null	null	13998	-0.344382	0.17604	Yes
row_26	180431	Dwarfin sma	null	null	15425	-0.446021	0.134956	Yes
row_27	177460	Stress-activated protein kinase jnk-1	null	null	15604	-0.461695	0.161084	Yes
NAME	AUTOPHAGY - ANIMAL	Description	GENE SYMBOL	GENE_TITLE	RANK IN GENE LIST	RANK METRIC SCORE	RUNNING ES	CORE ENRICHMENT
row_0	178613	Cysteine PRotease related	null	null	1915	0.60681	-0.0916873	No
row_1	176230	5'-AMP-activated protein kinase catalytic subunit alpha-1	null	null	2103	0.563608	-0.0900247	No
row_2	182509	Mtor (MTOR) associated protein, LST8 homolog	null	null	3095	0.397543	-0.131796	No
row_3	178611	hypothetical protein	null	null	3449	0.353391	-0.139101	No
row_4	172141	phosphoinositide kinase AdAPter subunit	null	null	3678	0.330585	-0.139653	No
row_5	180111	CathePsin L family	null	null	4055	0.296228	-0.148201	Yes
row_6	180185	Serine/threonine-protein kinase par-4	null	null	4107	0.292193	-0.139191	Yes
row_7	174762	Phosphatidylinositol 3-kinase age-1	null	null	4123	0.290831	-0.128237	Yes
row_8	176869	Phosphatidylinositol 3,4,5-trisphosphate 3-phosphatase and dual-specificity protein phosphatase daf-18	null	null	4499	0.262967	-0.13673	Yes
row_9	171769	Eukaryotic Initiation Factor	null	null	4588	0.255847	-0.129719	Yes
row_10	190617	Protein Phosphatase Four Regulatory subunit	null	null	5028	0.223591	-0.14167	Yes
row_11	175793	Ubiquitin-like protein ATG12	null	null	5209	0.21201	-0.13963	Yes
row_12	178084	RAs-related GTP binding protein C homolog	null	null	5221	0.211395	-0.128459	Yes
row_13	174305	IRE1 kinase related	null	null	5575	0.19016	-0.135764	Yes
row_14	172663	SYntaXin	null	null	5643	0.186104	-0.127619	Yes
row_15	176470	Ras-related protein Rab-33	null	null	5819	0.176936	-0.125308	Yes
row_16	181444	ASpartyl Protease	null	null	6036	0.165205	-0.125212	Yes
row_17	174726	RAs-related GTP-binding protein A	null	null	6353	0.147474	-0.130518	Yes
row_18	176233	Soluble NSF attachment protein 29	null	null	6491	0.140788	-0.126155	Yes
row_19	175545	Mitogen-activated protein kinase mpk-1	null	null	6586	0.135949	-0.119468	Yes
row_20	180931	Cathepsin B-like cysteine proteinase 6	null	null	6676	0.131361	-0.112511	Yes
row_21	183959	AuTophaGy (yeast Atg homolog)	null	null	6958	0.114809	-0.115927	Yes
row_22	178005	AuTophaGy (yeast Atg homolog)	null	null	6991	0.113244	-0.105891	Yes
row_23	178612	Cathepsin B-like cysteine proteinase 5	null	null	7049	0.110208	-0.0972052	Yes
row_24	177041	VAMP (Vesicle Associated Membrane Protein) homolog	null	null	7210	0.101932	-0.094084	Yes
row_25	177345	Beclin homolog	null	null	7353	0.0941136	-0.0899904	Yes
row_26	180033	Cathepsin B-like cysteine proteinase 3	null	null	7452	0.0878274	-0.0835198	Yes
row_27	171735	Autophagy protein 5	null	null	7547	0.0824163	-0.0768332	Yes
row_28	176327	GTP-binding protein Rheb homolog 1	null	null	7610	0.0782159	-0.0684178	Yes
row_29	177546	Inositol 1,4,5-trisphosphate receptor itr-1	null	null	7670	0.0747232	-0.0598404	Yes
row_30	176921	AuTophaGy (yeast Atg homolog)	null	null	7697	0.0728536	-0.0494803	Yes
row_31	172842	Mitogen-activated protein kinase kinase kinase mom-4	null	null	7811	0.0675892	-0.04382	Yes
row_32	179424	Serine/threonine-protein kinase akt-1	null	null	8035	0.0562733	-0.0441022	Yes
row_33	171872	Dual specificity mitogen-activated protein kinase kinase mek-2	null	null	8041	0.0557001	-0.0326076	Yes
row_34	172847	Ectopic P Granules	null	null	8165	0.0491424	-0.0274876	Yes
row_35	177770	Uncharacterized protein	null	null	8416	0.0347015	-0.0292284	Yes
row_36	172167	Target of rapamycin homolog	null	null	8680	0.0184263	-0.0316715	Yes
row_37	179053	Cathepsin B-like cysteine proteinase 4	null	null	8730	0.0152992	-0.0225538	Yes
row_38	176554	Ribosomal protein S6 kinase beta	null	null	8831	0.00923085	-0.0161913	Yes
row_39	176712	Ectopic P granules protein 3	null	null	8875	0.00601532	-0.00674956	Yes
row_40	191169	Mitogen-activated protein kinase	null	null	9074	-0.00621454	-0.0056812	Yes
row_41	179815	hypothetical protein	null	null	9207	-0.0154078	-0.00104739	Yes
row_42	176150	Autophagy-related protein 13 homolog	null	null	9335	-0.0254808	0.00385653	Yes
row_43	178117	Serine/threonine-protein phosphatase 2A catalytic subunit	null	null	9405	-0.0302805	0.0118937	Yes
row_44	174953	Eukaryotic translation initiation factor 2-alpha kinase gcn-2	null	null	9449	-0.0333261	0.0213355	Yes
row_45	175490	Myotubularin-related protein 3	null	null	9659	-0.0484168	0.0218096	Yes
row_46	174827	related to yeast Vacuolar Protein Sorting factor	null	null	9714	-0.0521395	0.0306571	Yes
row_47	190882	Uncharacterized protein	null	null	9763	-0.0554739	0.0398288	Yes
row_48	174834	RAB family	null	null	9886	-0.0651833	0.0450028	Yes
row_49	178349	VAMP (Vesicle Associated Membrane Protein) homolog	null	null	9893	-0.0661421	0.0564434	Yes
row_50	181334	Eukaryotic translation initiation factor 2-alpha kinase pek-1	null	null	10157	-0.0824558	0.0540003	Yes
row_51	176866	GLH-binding kinase 1	null	null	10179	-0.0839972	0.0646306	Yes
row_52	172280	Phosphatidylinositol 3-kinase catalytic subunit type 3	null	null	10305	-0.0931146	0.0696425	Yes
row_53	178104	Ras protein let-60	null	null	10559	-0.111544	0.0677397	Yes
row_54	190777	Cysteine protease	null	null	10574	-0.112932	0.0787481	Yes
row_55	179246	AuTophaGy (yeast Atg homolog)	null	null	10817	-0.128564	0.0774395	Yes
row_56	174067	Autophagic-related protein 16.2	null	null	10861	-0.131278	0.0868813	Yes
row_57	174050	Protein lgg-1	null	null	11234	-0.158636	0.0785498	Yes
row_58	189585	hypothetical protein	null	null	11361	-0.166889	0.0835078	Yes
row_59	180359	HIF (Hypoxia Inducible Factor) homologa	null	null	11748	-0.194293	0.07442	Yes
row_60	175625	R-RAS related	null	null	11988	-0.209773	0.0732735	Yes
row_61	180667	hypothetical protein	null	null	12512	-0.245401	0.0567847	Yes
row_62	180912	LAMP family protein lmp-1	null	null	12677	-0.257265	0.0596898	Yes
row_63	176825	Protein kinase C-like 1	null	null	13123	-0.284465	0.0474147	Yes
row_64	181727	5'-AMP-activated protein kinase catalytic subunit alpha-2	null	null	13263	-0.29419	0.0516704	Yes
row_65	178561	AuTophaGy (yeast Atg homolog)	null	null	13304	-0.297157	0.0612742	Yes
row_66	174875	R-RAS related	null	null	13408	-0.303496	0.0674747	Yes
row_67	3565022	Cysteine protease	null	null	13489	-0.309331	0.0749176	Yes
row_68	187322	DAP (Death-Associated Protein) Kinase homolog	null	null	13531	-0.312074	0.0844674	Yes
row_69	177040	Ectopic P Granules	null	null	13539	-0.312721	0.095854	Yes
row_70	180947	Aspartic protease 3	null	null	13621	-0.316969	0.103243	Yes
row_71	180311	Serine/threonine-protein kinase unc-51	null	null	13648	-0.318888	0.113603	Yes
row_72	3565407	cAMP-dependent protein kinase catalytic subunit	null	null	13669	-0.320074	0.124287	Yes
row_73	181524	Serine/threonine-protein kinase akt-2	null	null	13998	-0.344382	0.118333	Yes
row_74	180978	Insulin receptor SubsTrate homolog	null	null	14168	-0.355275	0.120968	Yes
row_75	180717	Autophagic-related protein 16.1	null	null	14298	-0.364778	0.125764	Yes
row_76	181053	NIP3 homolog	null	null	14674	-0.39174	0.11727	Yes
row_77	185355	Cysteine PRotease related	null	null	14987	-0.412659	0.11218	Yes
row_78	177460	Stress-activated protein kinase jnk-1	null	null	15604	-0.461695	0.0906672	Yes
row_79	180475	3-phosphoinositide-dependent protein kinase 1	null	null	15700	-0.470937	0.0972999	Yes
row_80	180949	AuTophaGy (yeast Atg homolog)	null	null	15730	-0.473791	0.107498	Yes
row_81	179645	hypothetical protein	null	null	15779	-0.479077	0.11667	Yes
row_82	179637	Gut-specific cysteine proteinase	null	null	16025	-0.504959	0.115199	Yes
row_83	180996	Ectopic P Granules	null	null	16254	-0.531181	0.114647	Yes
row_84	3565956	hypothetical protein	null	null	16505	-0.565077	0.112906	Yes
NAME	CALCIUM SIGNALING PATHWAY	Description	GENE SYMBOL	GENE_TITLE	RANK IN GENE LIST	RANK METRIC SCORE	RUNNING ES	CORE ENRICHMENT
row_0	189112	Adenine Nucleotide Translocator	null	null	1066	0.900199	-0.0402621	No
row_1	177648	Adenine Nucleotide Translocator	null	null	1342	0.785797	-0.0378551	No
row_2	186855	Adenine Nucleotide Translocator	null	null	2607	0.472602	-0.088798	No
row_3	177858	Uncharacterized protein	null	null	2689	0.458744	-0.0759261	No
row_4	184917	hypothetical protein	null	null	3061	0.400952	-0.0786976	No
row_5	183197	Sphingosine kinase 1	null	null	4357	0.273259	-0.131313	No
row_6	177362	Calcium uniporter protein, mitochondrial	null	null	4750	0.243077	-0.135217	No
row_7	177524	Probable voltage-dependent anion-selective channel	null	null	5337	0.204077	-0.149587	No
row_8	173929	NMDA class glutamate Receptor	null	null	5619	0.187662	-0.147503	No
row_9	177525	Phosphoinositide phospholipase C	null	null	6374	0.146599	-0.170935	No
row_10	175201	Stromal interaction molecule 1	null	null	6966	0.114593	-0.185574	No
row_11	190101	hypothetical protein	null	null	7031	0.111113	-0.171785	No
row_12	175221	ORAI (store-operated calcium channel) homolog	null	null	7296	0.0971156	-0.168785	No
row_13	177546	Inositol 1,4,5-trisphosphate receptor itr-1	null	null	7670	0.0747232	-0.171664	No
row_14	172914	Metabotropic GLutamate receptor family	null	null	8051	0.0550028	-0.174921	No
row_15	183056	Thyrotropin-Releasing Hormone Receptor	null	null	8550	0.0264714	-0.184544	No
row_16	177092	Uncharacterized protein	null	null	8779	0.0125742	-0.179601	No
row_17	176149	Probable phosphorylase b kinase regulatory subunit alpha	null	null	8881	0.00580194	-0.167808	No
row_18	178537	1-phosphatidylinositol 4,5-bisphosphate phosphodiesterase beta egl-8	null	null	9672	-0.0492959	-0.193182	Yes
row_19	4363086	Peptidyl-prolyl cis-trans isomerase	null	null	9864	-0.0635196	-0.186244	Yes
row_20	179715	CALmodulin related genes	null	null	9873	-0.0641065	-0.169434	Yes
row_21	176512	Calcium-transporting ATPase	null	null	10142	-0.0816374	-0.166649	Yes
row_22	181166	Protein kinase C	null	null	10302	-0.0929225	-0.157985	Yes
row_23	176773	Adenine Nucleotide Translocator	null	null	10314	-0.0938658	-0.141337	Yes
row_24	186916	hypothetical protein	null	null	11014	-0.143845	-0.161802	Yes
row_25	174586	1-phosphatidylinositol 4,5-bisphosphate phosphodiesterase gamma plc-3	null	null	11035	-0.145261	-0.145639	Yes
row_26	182789	CALmodulin related genes	null	null	11157	-0.152793	-0.134925	Yes
row_27	181217	Myosin Light Chain Kinase related	null	null	11462	-0.173484	-0.134082	Yes
row_28	179572	CalciNeurin B	null	null	11502	-0.176538	-0.118945	Yes
row_29	177089	Calcium-transporting ATPase	null	null	11776	-0.196899	-0.11643	Yes
row_30	171687	G protein, Subunit Alpha	null	null	12100	-0.217207	-0.116612	Yes
row_31	178614	CalMoDulin	null	null	12328	-0.232437	-0.111616	Yes
row_32	177921	Calcium/calmodulin-dependent protein kinase type II	null	null	12388	-0.236445	-0.0975573	Yes
row_33	174462	Receptor protein-tyrosine kinase	null	null	12392	-0.236785	-0.0804777	Yes
row_34	172128	Inositol-trisphosphate 3-kinase homolog	null	null	12654	-0.255537	-0.0773156	Yes
row_35	180565	SERotonin/octopamine receptor family	null	null	12681	-0.257434	-0.0614767	Yes
row_36	180318	Na/Ca eXchangers	null	null	12919	-0.272702	-0.0570199	Yes
row_37	181274	1-phosphatidylinositol 4,5-bisphosphate phosphodiesterase epsilon-1	null	null	13014	-0.278432	-0.0448492	Yes
row_38	177943	Serine/threonine-protein phosphatase 2B catalytic subunit	null	null	13047	-0.280546	-0.029334	Yes
row_39	3565407	cAMP-dependent protein kinase catalytic subunit	null	null	13669	-0.320074	-0.0455913	Yes
row_40	177513	Uncharacterized protein	null	null	13804	-0.330225	-0.0355784	Yes
row_41	175341	CholecystoKinin Receptor homolog	null	null	13996	-0.344171	-0.0286401	Yes
row_42	173200	Phosphodiesterase	null	null	14335	-0.367995	-0.0296316	Yes
row_43	171751	hypothetical protein	null	null	14377	-0.370815	-0.0146019	Yes
row_44	179080	hypothetical protein	null	null	14404	-0.373162	0.00123698	Yes
row_45	177143	CALmodulin related genes	null	null	14542	-0.38302	0.0110881	Yes
row_46	181045	Voltage-dependent T-type calcium channel subunit alpha	null	null	14570	-0.385215	0.026873	Yes
row_47	175622	Adenylyl CYclase	null	null	14747	-0.396627	0.0346204	Yes
row_48	180714	DOPamine receptor	null	null	15351	-0.440334	0.019334	Yes
row_49	178918	Na/Ca eXchangers	null	null	15399	-0.443479	0.0340401	Yes
row_50	175893	G-protein-linked Acetylcholine Receptor	null	null	15903	-0.491554	0.024148	Yes
row_51	179962	Muscarinic acetylcholine receptor gar-3	null	null	15934	-0.494715	0.0397711	Yes
row_52	180922	Probable muscarinic acetylcholine receptor gar-1	null	null	16127	-0.516331	0.0466553	Yes
row_53	188774	CholecystoKinin Receptor homolog	null	null	16193	-0.523699	0.0603904	Yes
row_54	177945	CALmodulin related genes	null	null	16494	-0.563938	0.0614488	Yes
row_55	177795	Calcium-transporting ATPase	null	null	16508	-0.565337	0.0779889	Yes
row_56	181716	SERotonin/octopamine receptor family	null	null	16526	-0.567285	0.0943133	Yes
row_57	183595	TachyKinin Receptor family	null	null	17559	-0.84505	0.0558852	Yes
NAME	DRUG METABOLISM - CYTOCHROME P450	Description	GENE SYMBOL	GENE_TITLE	RANK IN GENE LIST	RANK METRIC SCORE	RUNNING ES	CORE ENRICHMENT
row_0	187615	Probable glutathione S-transferase 9	null	null	730	1.06187	-0.0171288	No
row_1	184405	Glutathione S-Transferase	null	null	1776	0.644096	-0.0512377	No
row_2	177886	Glutathione S-transferase 4	null	null	3205	0.381222	-0.105992	No
row_3	178940	Putative UDP-glucuronosyltransferase ugt-48	null	null	3254	0.375424	-0.0863577	No
row_4	176281	Glutathione S-transferase P	null	null	3270	0.373694	-0.0649441	No
row_5	175591	UDP-glucuronosyltransferase	null	null	3285	0.371182	-0.0434765	No
row_6	191563	Glutathione S-transferase kappa 1	null	null	4293	0.27837	-0.0755371	No
row_7	179627	Alcohol dehydrogenase 1	null	null	7017	0.111652	-0.200099	No
row_8	185299	Glutathione S-Transferase	null	null	7570	0.0811065	-0.207633	Yes
row_9	185500	UDP-glucuronosyltransferase	null	null	7767	0.0698183	-0.195976	Yes
row_10	183957	hypothetical protein	null	null	7866	0.0650749	-0.179037	Yes
row_11	24104550	Glutathione S-Transferase	null	null	8242	0.0446669	-0.177029	Yes
row_12	178597	Alcohol dehydrogenase class-3	null	null	8488	0.03037	-0.168014	Yes
row_13	183000	Glutathione transferase omega-1	null	null	8677	0.0187681	-0.155926	Yes
row_14	173842	Probable glutathione S-transferase 7	null	null	8869	0.0062084	-0.143999	Yes
row_15	177958	Flavin-containing monooxygenase	null	null	9087	-0.00691581	-0.133475	Yes
row_16	179755	UDP-glucuronosyltransferase	null	null	9088	-0.00692038	-0.111252	Yes
row_17	181205	UDP-glucuronosyltransferase	null	null	9754	-0.0547872	-0.124877	Yes
row_18	179127	Glutathione S-Transferase	null	null	9859	-0.0633057	-0.108261	Yes
row_19	181413	Putative UDP-glucuronosyltransferase ugt-50	null	null	10011	-0.0737451	-0.0941788	Yes
row_20	187645	Probable glutathione S-transferase gst-36	null	null	10086	-0.0785892	-0.0759456	Yes
row_21	178596	Flavin-containing monooxygenase	null	null	10098	-0.0792932	-0.0543163	Yes
row_22	13190517	hypothetical protein	null	null	10188	-0.0849045	-0.0368917	Yes
row_23	178725	Glutathione S-Transferase	null	null	11145	-0.15199	-0.0662031	Yes
row_24	191347	Glutathione S-Transferase	null	null	11468	-0.17389	-0.0613384	Yes
row_25	174507	Putative UDP-glucuronosyltransferase ugt-58	null	null	11526	-0.178618	-0.0421888	Yes
row_26	177954	Flavin-containing monooxygenase	null	null	11545	-0.179776	-0.0209369	Yes
row_27	177883	Glutathione S-transferase 3	null	null	11702	-0.191716	-0.00712388	Yes
row_28	176491	Flavin-containing MonoOxygenase family	null	null	11835	-0.200845	0.00798282	Yes
row_29	184364	Probable glutathione S-transferase 8	null	null	11886	-0.203427	0.0275098	Yes
row_30	177884	Glutathione S-transferase 2	null	null	12509	-0.245041	0.0162028	Yes
row_31	188072	Putative UDP-glucuronosyltransferase ugt-55	null	null	12589	-0.250898	0.0341665	Yes
row_32	188073	Putative UDP-glucuronosyltransferase ugt-56	null	null	12951	-0.274181	0.0369289	Yes
row_33	179845	Flavin-containing monooxygenase	null	null	12954	-0.27431	0.0590433	Yes
row_34	173841	Probable glutathione S-transferase 6	null	null	13008	-0.277897	0.0784085	Yes
row_35	177498	Glutathione s-transferase kappa 2	null	null	13074	-0.282215	0.0971269	Yes
row_36	187537	Glutathione S-Transferase	null	null	13102	-0.283521	0.117894	Yes
row_37	183462	UDP-glucuronosyltransferase	null	null	13582	-0.315483	0.114295	Yes
row_38	24104108	Probable aldehyde oxidase gad-3	null	null	14057	-0.348539	0.110966	Yes
row_39	179759	UDP-glucuronosyltransferase	null	null	14737	-0.396151	0.0965866	Yes
row_40	180404	Putative UDP-glucuronosyltransferase ugt-46	null	null	14956	-0.411149	0.107057	Yes
row_41	353420	Probable glutathione transferase omega-2	null	null	15253	-0.431332	0.113324	Yes
row_42	187817	Glutathione S-Transferase	null	null	15647	-0.466109	0.114361	Yes
row_43	189017	Glutathione S-Transferase	null	null	16382	-0.546116	0.0970167	Yes
row_44	179628	Alcohol dehydrogenase 2	null	null	18009	-1.10341	0.0315886	Yes
NAME	ECM-RECEPTOR INTERACTION	Description	GENE SYMBOL	GENE_TITLE	RANK IN GENE LIST	RANK METRIC SCORE	RUNNING ES	CORE ENRICHMENT
row_0	175504	Integrin beta pat-3	null	null	11807	-0.198424	-0.510195	Yes
row_1	181708	Collagen alpha-2(IV) chain	null	null	13327	-0.298454	-0.466914	Yes
row_2	177292	LAMinin related. See also lmb-	null	null	15732	-0.473877	-0.471245	Yes
row_3	3565243	AGRin (synaptic protein) homolog	null	null	15916	-0.492819	-0.35609	Yes
row_4	180980	Laminin-like protein lam-2	null	null	16108	-0.513515	-0.241365	Yes
row_5	181283	DystroGlycaN	null	null	16374	-0.545553	-0.130622	Yes
row_6	177956	Laminin-like protein epi-1	null	null	16615	-0.579105	-0.0185335	Yes
row_7	172952	LAMinin related. See also lmb-	null	null	16826	-0.614379	0.0951689	Yes
NAME	ERBB SIGNALING PATHWAY	Description	GENE SYMBOL	GENE_TITLE	RANK IN GENE LIST	RANK METRIC SCORE	RUNNING ES	CORE ENRICHMENT
row_0	187536	Putative serine/threonine-protein kinase R03D7.5	null	null	2657	0.46513	-0.116857	No
row_1	189074	SAPK/ERK kinase	null	null	3504	0.348039	-0.136128	No
row_2	172141	phosphoinositide kinase AdAPter subunit	null	null	3678	0.330585	-0.119134	No
row_3	174762	Phosphatidylinositol 3-kinase age-1	null	null	4123	0.290831	-0.116744	No
row_4	3565400	Non-specific serine/threonine protein kinase	null	null	4670	0.249727	-0.119849	No
row_5	177436	Raf homolog serine/threonine-protein kinase	null	null	5297	0.206243	-0.127265	No
row_6	176968	Cell death abnormality protein 2	null	null	5576	0.190155	-0.11593	No
row_7	175545	Mitogen-activated protein kinase mpk-1	null	null	6586	0.135949	-0.143984	No
row_8	179527	Serine/threonine-protein kinase pak-2	null	null	7936	0.0616693	-0.190359	Yes
row_9	179424	Serine/threonine-protein kinase akt-1	null	null	8035	0.0562733	-0.169324	Yes
row_10	171872	Dual specificity mitogen-activated protein kinase kinase mek-2	null	null	8041	0.0557001	-0.143278	Yes
row_11	172167	Target of rapamycin homolog	null	null	8680	0.0184263	-0.151341	Yes
row_12	181004	Dual specificity mitogen-activated protein kinase kinase mek-1	null	null	8814	0.0101123	-0.132192	Yes
row_13	176554	Ribosomal protein S6 kinase beta	null	null	8831	0.00923085	-0.106738	Yes
row_14	191169	Mitogen-activated protein kinase	null	null	9074	-0.00621454	-0.0934623	Yes
row_15	178846	Son of sevenless homolog	null	null	9658	-0.0482258	-0.0985615	Yes
row_16	176866	GLH-binding kinase 1	null	null	10179	-0.0839972	-0.100266	Yes
row_17	181166	Protein kinase C	null	null	10302	-0.0929225	-0.0805242	Yes
row_18	178104	Ras protein let-60	null	null	10559	-0.111544	-0.068003	Yes
row_19	174586	1-phosphatidylinositol 4,5-bisphosphate phosphodiesterase gamma plc-3	null	null	11035	-0.145261	-0.0672826	Yes
row_20	183461	hypothetical protein	null	null	11111	-0.150169	-0.0450082	Yes
row_21	3565745	SHC-transforming protein homolog 1	null	null	11207	-0.157058	-0.0238115	Yes
row_22	180419	Suppressor of LIneage defect	null	null	11623	-0.185715	-0.0198581	Yes
row_23	181055	Sex muscle abnormal protein 5	null	null	11687	-0.190197	0.00306295	Yes
row_24	171722	Tyrosine protein-kinase src-1	null	null	11911	-0.205289	0.0173624	Yes
row_25	178465	Signal transducer and activator of transcription 1	null	null	11920	-0.205957	0.0432471	Yes
row_26	180690	NCK (Non-Catalytic region of tyrosine Kinase) adaptor protein family	null	null	12291	-0.230485	0.0496254	Yes
row_27	177921	Calcium/calmodulin-dependent protein kinase type II	null	null	12388	-0.236445	0.0707682	Yes
row_28	174462	Receptor protein-tyrosine kinase	null	null	12392	-0.236785	0.0969223	Yes
row_29	185682	MAP kinase kinase mkk-4	null	null	12751	-0.261661	0.103947	Yes
row_30	180873	Serine/threonine-protein kinase pak-1	null	null	12800	-0.264862	0.127677	Yes
row_31	173149	Glycogen synthase kinase-3	null	null	13035	-0.279362	0.141383	Yes
row_32	172135	Inactive tyrosine-protein kinase kin-32	null	null	13206	-0.290072	0.158539	Yes
row_33	181524	Serine/threonine-protein kinase akt-2	null	null	13998	-0.344382	0.142231	Yes
row_34	181261	Tyrosine-protein kinase abl-1	null	null	14069	-0.349191	0.164775	Yes
row_35	177016	Uncharacterized protein	null	null	14230	-0.359524	0.182469	Yes
row_36	177460	Stress-activated protein kinase jnk-1	null	null	15604	-0.461695	0.134801	Yes
row_37	3565956	hypothetical protein	null	null	16505	-0.565077	0.11262	Yes
NAME	GLYCOSPHINGOLIPID BIOSYNTHESIS - GLOBO AND ISOGLOBO SERIES	Description	GENE SYMBOL	GENE_TITLE	RANK IN GENE LIST	RANK METRIC SCORE	RUNNING ES	CORE ENRICHMENT
row_0	179660	GAlactosidase/N-Acetylgalactosaminidase	null	null	15874	-0.488434	-0.353716	Yes
row_1	180533	Beta-hexosaminidase A	null	null	16943	-0.640512	0.0888459	Yes
NAME	LYSOSOME	Description	GENE SYMBOL	GENE_TITLE	RANK IN GENE LIST	RANK METRIC SCORE	RUNNING ES	CORE ENRICHMENT
row_0	184165	intestinal acid PHOsphatase	null	null	1294	0.80284	-0.0597494	No
row_1	178613	Cysteine PRotease related	null	null	1915	0.60681	-0.0830625	No
row_2	179223	Probable V-type proton ATPase subunit H 1	null	null	2059	0.573674	-0.080589	No
row_3	184466	hypothetical protein	null	null	2143	0.554947	-0.0748719	No
row_4	178611	hypothetical protein	null	null	3449	0.353391	-0.135216	No
row_5	188466	intestinal acid PHOsphatase	null	null	3724	0.32587	-0.139824	No
row_6	178219	V-type proton ATPase subunit a	null	null	4027	0.298068	-0.145946	No
row_7	180111	CathePsin L family	null	null	4055	0.296228	-0.137202	No
row_8	181572	Carboxypeptidase	null	null	4362	0.272958	-0.14354	No
row_9	172627	hypothetical protein	null	null	4676	0.249329	-0.150257	No
row_10	171829	CathePsin Z	null	null	4900	0.232679	-0.152108	No
row_11	179249	Battenin	null	null	5090	0.219854	-0.152121	No
row_12	173896	Intestinal acid phosphatase	null	null	5157	0.215766	-0.145485	No
row_13	174308	Cystinosin homolog	null	null	5706	0.182288	-0.164906	No
row_14	181444	ASpartyl Protease	null	null	6036	0.165205	-0.172487	No
row_15	173574	Putative glucosylceramidase 1	null	null	6039	0.165056	-0.162392	No
row_16	174547	Putative acid phosphatase 11	null	null	6094	0.162276	-0.155107	No
row_17	180931	Cathepsin B-like cysteine proteinase 6	null	null	6676	0.131361	-0.176311	No
row_18	172553	AP-3 complex subunit beta	null	null	6705	0.129815	-0.167621	No
row_19	178612	Cathepsin B-like cysteine proteinase 5	null	null	7049	0.110208	-0.175959	No
row_20	178989	AdaPtin, Small chain (clathrin associated complex)	null	null	7216	0.101652	-0.174729	No
row_21	180033	Cathepsin B-like cysteine proteinase 3	null	null	7452	0.0878274	-0.177229	No
row_22	175426	Putative protein heh-1	null	null	7504	0.0850082	-0.169782	No
row_23	172171	Battenin	null	null	7542	0.0825671	-0.161578	No
row_24	180939	NRAMP-like transporter smf-1	null	null	7848	0.0658968	-0.167863	No
row_25	173818	Uncharacterized serine carboxypeptidase F41C3.5	null	null	7929	0.0619996	-0.161983	No
row_26	190242	hypothetical protein	null	null	8476	0.0312538	-0.181296	Yes
row_27	183155	Putative glucosylceramidase 2	null	null	8497	0.0294965	-0.172173	Yes
row_28	177651	SaPosin-like Protein family	null	null	8549	0.0264742	-0.164726	Yes
row_29	174272	Vacuolar H ATPase	null	null	8679	0.0185258	-0.161496	Yes
row_30	179053	Cathepsin B-like cysteine proteinase 4	null	null	8730	0.0152992	-0.153995	Yes
row_31	174743	V-type proton ATPase subunit a	null	null	8762	0.0135392	-0.145466	Yes
row_32	178563	LIPase Like	null	null	8793	0.0115604	-0.136884	Yes
row_33	176383	V-type proton ATPase 16 kDa proteolipid subunit 1	null	null	8843	0.0081585	-0.129329	Yes
row_34	190115	HAlF transporter (PGP related)	null	null	8953	0.00194171	-0.125017	Yes
row_35	173701	AP-3 complex subunit delta	null	null	8957	0.00168879	-0.114975	Yes
row_36	176434	Probable clathrin heavy chain 1	null	null	8985	-9.36e-05	-0.106231	Yes
row_37	184959	Putative acid phosphatase F26C11.1	null	null	9173	-0.0135185	-0.106136	Yes
row_38	179815	hypothetical protein	null	null	9207	-0.0154078	-0.097716	Yes
row_39	179559	Battenin	null	null	9248	-0.018234	-0.0896743	Yes
row_40	182948	intestinal acid PHOsphatase	null	null	9284	-0.0217723	-0.0813624	Yes
row_41	179714	hypothetical protein	null	null	9323	-0.0245984	-0.0732126	Yes
row_42	177044	NRAMP-like transporter smf-3	null	null	9408	-0.0305468	-0.0675495	Yes
row_43	173304	AdaPtin, Gamma chain (clathrin associated complex)	null	null	9511	-0.0382363	-0.0628595	Yes
row_44	176166	Cell-death-related nuclease 7	null	null	9617	-0.0459192	-0.0583318	Yes
row_45	173121	AP-1 complex subunit mu-1-I	null	null	9649	-0.0477967	-0.0498035	Yes
row_46	171639	HAlF transporter (PGP related)	null	null	9681	-0.0501327	-0.0412753	Yes
row_47	176673	SCAVenger receptor (CD36 family) related	null	null	9689	-0.0505783	-0.0314496	Yes
row_48	177103	Vacuolar H ATPase	null	null	9902	-0.066485	-0.0327063	Yes
row_49	176257	Probable V-type proton ATPase 116 kDa subunit a	null	null	10062	-0.0768068	-0.0310977	Yes
row_50	172134	V-type proton ATPase subunit	null	null	10520	-0.108964	-0.045599	Yes
row_51	179771	Lipase	null	null	10527	-0.10956	-0.0357193	Yes
row_52	181174	Deoxyribonuclease-2	null	null	10538	-0.110357	-0.0260558	Yes
row_53	177018	Description	null	null	10543	-0.110645	-0.0160679	Yes
row_54	13184830	hypothetical protein	null	null	10698	-0.120422	-0.0141891	Yes
row_55	180860	Nucleoside-diphosphatase mig-23	null	null	10887	-0.133099	-0.0141483	Yes
row_56	171691	AdaPtin, Small chain (clathrin associated complex)	null	null	10911	-0.135446	-0.00518757	Yes
row_57	180749	Alpha-mannosidase	null	null	10936	-0.137675	0.00371908	Yes
row_58	172288	HAlF transporter (PGP related)	null	null	11098	-0.148822	0.00521951	Yes
row_59	174131	Sphingomyelin phosphodiesterase 1	null	null	11255	-0.159916	0.00699025	Yes
row_60	172457	hypothetical protein	null	null	11292	-0.162238	0.0152482	Yes
row_61	191766	NRAMP-like transporter smf-2	null	null	11406	-0.169851	0.0193435	Yes
row_62	188583	Beta-galactosidase	null	null	11544	-0.179635	0.0221414	Yes
row_63	175938	Carboxypeptidase	null	null	11564	-0.181331	0.0313183	Yes
row_64	180534	Probable V-type proton ATPase subunit H 2	null	null	11766	-0.195544	0.0306563	Yes
row_65	178535	Putative glucosylceramidase 3	null	null	11926	-0.206135	0.0322649	Yes
row_66	177626	V-type proton ATPase subunit a	null	null	11965	-0.20842	0.0404147	Yes
row_67	180719	Niemann-Pick C1 protein homolog 1	null	null	12152	-0.220506	0.0405637	Yes
row_68	183002	Putative galactocerebrosidase	null	null	12202	-0.223738	0.0481188	Yes
row_69	176316	Cell death-related nuclease 6	null	null	12228	-0.225899	0.0569714	Yes
row_70	172180	AdaPtin, Mu/medium chain (clathrin associated complex)	null	null	12318	-0.231899	0.0623641	Yes
row_71	179240	hypothetical protein	null	null	12579	-0.249652	0.0585126	Yes
row_72	180912	LAMP family protein lmp-1	null	null	12677	-0.257265	0.0634729	Yes
row_73	191744	Palmitoyl-protein thioesterase 1	null	null	12724	-0.26047	0.0711902	Yes
row_74	180550	Glycosylasparaginase beta chain	null	null	12768	-0.262836	0.0790697	Yes
row_75	176879	Putative sphingomyelin phosphodiesterase asm-3	null	null	13038	-0.279527	0.0747317	Yes
row_76	179818	CathePsin Z	null	null	13478	-0.308712	0.0612035	Yes
row_77	192062	Tetraspanin	null	null	13513	-0.310947	0.0695695	Yes
row_78	186194	AdaPtin, Mu/medium chain (clathrin associated complex)	null	null	13612	-0.316488	0.0744757	Yes
row_79	173326	hypothetical protein	null	null	13614	-0.316592	0.0846258	Yes
row_80	180947	Aspartic protease 3	null	null	13621	-0.316969	0.0945055	Yes
row_81	185021	Probable acid ceramidase	null	null	13882	-0.335777	0.090654	Yes
row_82	189194	AdaPTin or adaptin-related protein	null	null	14144	-0.353764	0.0867485	Yes
row_83	173120	Acid ceramidase	null	null	14731	-0.395896	0.0652734	Yes
row_84	185355	Cysteine PRotease related	null	null	14987	-0.412659	0.0616922	Yes
row_85	181323	Sphingomyelin phosphodiesterase 2	null	null	15342	-0.439631	0.0527591	Yes
row_86	3565150	hypothetical protein	null	null	15539	-0.45555	0.0523675	Yes
row_87	179645	hypothetical protein	null	null	15779	-0.479077	0.0496512	Yes
row_88	179660	GAlactosidase/N-Acetylgalactosaminidase	null	null	15874	-0.488434	0.0547737	Yes
row_89	179637	Gut-specific cysteine proteinase	null	null	16025	-0.504959	0.0568688	Yes
row_90	174802	Uncharacterized serine carboxypeptidase F13S12.6	null	null	16569	-0.572087	0.0377183	Yes
row_91	181517	Probable beta-mannosidase	null	null	16655	-0.584995	0.0433273	Yes
row_92	177314	Putative glucosylceramidase 4	null	null	16822	-0.613652	0.0445575	Yes
row_93	173897	intestinal acid PHOsphatase	null	null	16885	-0.627685	0.0514098	Yes
row_94	180533	Beta-hexosaminidase A	null	null	16943	-0.640512	0.0585325	Yes
row_95	3565543	hypothetical protein	null	null	17227	-0.723817	0.0534376	Yes
row_96	175063	hypothetical protein	null	null	17605	-0.866954	0.0432611	Yes
row_97	182251	Putative acid phosphatase 10	null	null	18206	-1.30976	0.0210293	Yes
NAME	MAPK SIGNALING PATHWAY	Description	GENE SYMBOL	GENE_TITLE	RANK IN GENE LIST	RANK METRIC SCORE	RUNNING ES	CORE ENRICHMENT
row_0	173880	Mitogen-activated protein kinase	null	null	375	1.28885	-0.00691395	No
row_1	181457	MaX-Like	null	null	1774	0.644903	-0.0690625	No
row_2	178507	Heat shock 70 kDa protein A	null	null	3400	0.358785	-0.143467	No
row_3	189074	SAPK/ERK kinase	null	null	3504	0.348039	-0.135695	No
row_4	259649	Late endosomal/lysosomal adaptor, Mapk (MAPK) and mToR (MTOR) activator homolog	null	null	4618	0.253778	-0.182456	Yes
row_5	3565400	Non-specific serine/threonine protein kinase	null	null	4670	0.249727	-0.171876	Yes
row_6	172647	Putative ribosomal protein S6 kinase alpha-1	null	null	4865	0.235562	-0.169018	Yes
row_7	174805	Description	null	null	5294	0.206352	-0.178793	Yes
row_8	177436	Raf homolog serine/threonine-protein kinase	null	null	5297	0.206243	-0.165568	Yes
row_9	176855	FiLamiN (actin binding protein) homolog	null	null	5396	0.200344	-0.157526	Yes
row_10	191704	Lateral-signal-Induced Phosphatase	null	null	5504	0.193453	-0.14997	Yes
row_11	176968	Cell death abnormality protein 2	null	null	5576	0.190155	-0.14047	Yes
row_12	179557	MaX-Like	null	null	6144	0.15902	-0.15775	Yes
row_13	177244	Uncharacterized protein	null	null	6162	0.157907	-0.145335	Yes
row_14	175862	Serine/threonine-protein kinase SULU	null	null	6462	0.142135	-0.148145	Yes
row_15	175545	Mitogen-activated protein kinase mpk-1	null	null	6586	0.135949	-0.141453	Yes
row_16	178306	Pelle/IL-1 receptor associated Kinase (IRAK)	null	null	7057	0.109857	-0.153496	Yes
row_17	179469	Protein phosphatase ppm-1	null	null	7149	0.105041	-0.145076	Yes
row_18	180263	Protein PHosphatase	null	null	7433	0.0889196	-0.147023	Yes
row_19	177894	PDZ eXchange Factor	null	null	7540	0.0828957	-0.139413	Yes
row_20	174233	Cell division control protein 42 homolog	null	null	7600	0.0789491	-0.129265	Yes
row_21	172842	Mitogen-activated protein kinase kinase kinase mom-4	null	null	7811	0.0675892	-0.12727	Yes
row_22	179424	Serine/threonine-protein kinase akt-1	null	null	8035	0.0562733	-0.125977	Yes
row_23	171872	Dual specificity mitogen-activated protein kinase kinase mek-2	null	null	8041	0.0557001	-0.112914	Yes
row_24	172246	MTK1/MEKK4 homolog	null	null	8584	0.0244359	-0.128845	Yes
row_25	173128	Dual-Leucine zipper Kinase	null	null	8755	0.0138783	-0.12469	Yes
row_26	181004	Dual specificity mitogen-activated protein kinase kinase mek-1	null	null	8814	0.0101123	-0.114488	Yes
row_27	177709	Ras-related protein Rap-1	null	null	8888	0.00540645	-0.105097	Yes
row_28	191169	Mitogen-activated protein kinase	null	null	9074	-0.00621454	-0.101752	Yes
row_29	173904	Tyrosine-protein phosphatase vhp-1	null	null	9465	-0.034296	-0.109476	Yes
row_30	3565569	hypothetical protein	null	null	9566	-0.0423416	-0.101542	Yes
row_31	178846	Son of sevenless homolog	null	null	9658	-0.0482258	-0.0931217	Yes
row_32	179462	Cdc-42 Related Protein	null	null	9675	-0.0494794	-0.0806522	Yes
row_33	190882	Uncharacterized protein	null	null	9763	-0.0554739	-0.0720163	Yes
row_34	176866	GLH-binding kinase 1	null	null	10179	-0.0839972	-0.0810899	Yes
row_35	181166	Protein kinase C	null	null	10302	-0.0929225	-0.0743437	Yes
row_36	177111	Ras-related protein ced-10	null	null	10541	-0.110597	-0.0738606	Yes
row_37	178104	Ras protein let-60	null	null	10559	-0.111544	-0.0614452	Yes
row_38	175410	Insulin-like receptor subunit beta	null	null	10862	-0.131363	-0.0644177	Yes
row_39	172581	Putative ribosomal protein S6 kinase alpha-2	null	null	10902	-0.134151	-0.0531901	Yes
row_40	177610	Mitogen-activated protein kinase pmk-3	null	null	10958	-0.139774	-0.0428263	Yes
row_41	191743	Mitogen-activated protein kinase pmk-1	null	null	11068	-0.147349	-0.0353782	Yes
row_42	181344	hypothetical protein	null	null	11241	-0.159057	-0.0313316	Yes
row_43	176808	Serine/threonine kinase NLK	null	null	11313	-0.163899	-0.0218318	Yes
row_44	174623	MAP kinase-interacting serine/threonine-protein kinase mnk-1	null	null	11389	-0.168893	-0.0125479	Yes
row_45	179572	CalciNeurin B	null	null	11502	-0.176538	-0.00526175	Yes
row_46	181556	TGF-beta-activated kinase 1 and MAP3K7-binding protein 1	null	null	11626	-0.185812	0.00143047	Yes
row_47	181055	Sex muscle abnormal protein 5	null	null	11687	-0.190197	0.0115242	Yes
row_48	177611	Mitogen-activated protein kinase	null	null	11963	-0.208312	0.0100096	Yes
row_49	175625	R-RAS related	null	null	11988	-0.209773	0.0220471	Yes
row_50	181289	Tyrosine-protein kinase receptor ver-3	null	null	12132	-0.219068	0.0276594	Yes
row_51	181576	ATF (cAMP-dependent transcription factor) family	null	null	12236	-0.226169	0.0354315	Yes
row_52	175954	mammalian ZAK kinase homolog	null	null	12264	-0.227767	0.047307	Yes
row_53	174462	Receptor protein-tyrosine kinase	null	null	12392	-0.236785	0.0537833	Yes
row_54	180446	Probable beta-arrestin	null	null	12557	-0.247844	0.0582618	Yes
row_55	181043	Dual specificity mitogen-activated protein kinase kinase sek-1	null	null	12712	-0.259361	0.0632803	Yes
row_56	185682	MAP kinase kinase mkk-4	null	null	12751	-0.261661	0.0745619	Yes
row_57	180873	Serine/threonine-protein kinase pak-1	null	null	12800	-0.264862	0.0853036	Yes
row_58	177943	Serine/threonine-protein phosphatase 2B catalytic subunit	null	null	13047	-0.280546	0.0853547	Yes
row_59	181157	Guanine nucleotide-binding protein alpha-12 subunit	null	null	13049	-0.280707	0.098634	Yes
row_60	180707	Caenorhabditis STE20-like kinase	null	null	13117	-0.284213	0.10835	Yes
row_61	174875	R-RAS related	null	null	13408	-0.303496	0.106025	Yes
row_62	3565407	cAMP-dependent protein kinase catalytic subunit	null	null	13669	-0.320074	0.10532	Yes
row_63	177513	Uncharacterized protein	null	null	13804	-0.330225	0.111419	Yes
row_64	180708	Serine/threonine-protein kinase cst-1 37kDa subunit	null	null	13823	-0.331684	0.12378	Yes
row_65	181524	Serine/threonine-protein kinase akt-2	null	null	13998	-0.344382	0.127719	Yes
row_66	177016	Uncharacterized protein	null	null	14230	-0.359524	0.12858	Yes
row_67	181168	FiLamiN (actin binding protein) homolog	null	null	14295	-0.364562	0.138458	Yes
row_68	181045	Voltage-dependent T-type calcium channel subunit alpha	null	null	14570	-0.385215	0.136997	Yes
row_69	24104671	Mitogen-activated protein kinase kinase kinase nsy-1	null	null	14938	-0.409416	0.130515	Yes
row_70	172757	Heat Shock Protein	null	null	15316	-0.437884	0.123493	Yes
row_71	171933	Calcium Channel, Beta subunit	null	null	15468	-0.449985	0.128673	Yes
row_72	177460	Stress-activated protein kinase jnk-1	null	null	15604	-0.461695	0.134718	Yes
row_73	175909	Protein let-756	null	null	16142	-0.517665	0.119057	Yes
row_74	175182	Protein ver-1	null	null	17231	-0.725812	0.0736462	Yes
NAME	NEUROACTIVE LIGAND-RECEPTOR INTERACTION	Description	GENE SYMBOL	GENE_TITLE	RANK IN GENE LIST	RANK METRIC SCORE	RUNNING ES	CORE ENRICHMENT
row_0	3565335	Ligand-Gated ion Channel	null	null	3715	0.326844	-0.16785	No
row_1	173929	NMDA class glutamate Receptor	null	null	5619	0.187662	-0.238096	No
row_2	7040157	hypothetical protein	null	null	7237	0.100648	-0.292938	No
row_3	175783	Partitioning defective protein 3	null	null	7331	0.0954433	-0.265689	No
row_4	183715	Dopamine receptor 4	null	null	7969	0.0598686	-0.267743	No
row_5	172914	Metabotropic GLutamate receptor family	null	null	8051	0.0550028	-0.239848	No
row_6	179347	DOPamine receptor	null	null	8291	0.0418043	-0.220463	No
row_7	183056	Thyrotropin-Releasing Hormone Receptor	null	null	8550	0.0264714	-0.202102	No
row_8	175322	SERotonin/octopamine receptor family	null	null	10176	-0.0836396	-0.257375	No
row_9	173398	NMUR (NeuroMedin U Receptor) homolog	null	null	12435	-0.239342	-0.346743	Yes
row_10	180565	SERotonin/octopamine receptor family	null	null	12681	-0.257434	-0.327682	Yes
row_11	191240	GABA B receptor subunit	null	null	12730	-0.260557	-0.29801	Yes
row_12	176691	Gamma-aminobutyric acid receptor subunit beta	null	null	13040	-0.279617	-0.282396	Yes
row_13	180002	NMDA class glutamate Receptor	null	null	13072	-0.282184	-0.251808	Yes
row_14	176472	hypothetical protein	null	null	13260	-0.293945	-0.229622	Yes
row_15	186230	human GoNadotropin-Releasing hormone Receptor (GnRHR) related	null	null	13610	-0.316468	-0.216163	Yes
row_16	3565717	Ligand-Gated ion Channel	null	null	13654	-0.319151	-0.186221	Yes
row_17	191707	Metabotropic GLutamate receptor family	null	null	13686	-0.321435	-0.155633	Yes
row_18	175341	CholecystoKinin Receptor homolog	null	null	13996	-0.344171	-0.140019	Yes
row_19	188499	Dopamine receptor 3	null	null	15276	-0.433175	-0.176654	Yes
row_20	180714	DOPamine receptor	null	null	15351	-0.440334	-0.148382	Yes
row_21	176694	Ligand-Gated ion Channel	null	null	15528	-0.454752	-0.125604	Yes
row_22	181598	SEcretin/class B GPCR	null	null	15897	-0.49086	-0.113168	Yes
row_23	175893	G-protein-linked Acetylcholine Receptor	null	null	15903	-0.491554	-0.0811795	Yes
row_24	179962	Muscarinic acetylcholine receptor gar-3	null	null	15934	-0.494715	-0.0505374	Yes
row_25	189837	GABA B receptor subunit	null	null	16003	-0.502605	-0.0219421	Yes
row_26	180922	Probable muscarinic acetylcholine receptor gar-1	null	null	16127	-0.516331	0.0036906	Yes
row_27	188774	CholecystoKinin Receptor homolog	null	null	16193	-0.523699	0.0324475	Yes
row_28	181716	SERotonin/octopamine receptor family	null	null	16526	-0.567285	0.0468224	Yes
row_29	177327	Metabotropic GLutamate receptor family	null	null	16701	-0.590467	0.069708	Yes
row_30	183595	TachyKinin Receptor family	null	null	17559	-0.84505	0.0558039	Yes
NAME	PHAGOSOME	Description	GENE SYMBOL	GENE_TITLE	RANK IN GENE LIST	RANK METRIC SCORE	RUNNING ES	CORE ENRICHMENT
row_0	172137	hypothetical protein	null	null	1902	0.610296	-0.0859445	No
row_1	179223	Probable V-type proton ATPase subunit H 1	null	null	2059	0.573674	-0.0776939	No
row_2	179055	SYntaXin	null	null	3884	0.311667	-0.15943	No
row_3	178219	V-type proton ATPase subunit a	null	null	4027	0.298068	-0.150424	No
row_4	180111	CathePsin L family	null	null	4055	0.296228	-0.135214	No
row_5	176793	ACTin	null	null	4570	0.257136	-0.146278	No
row_6	177440	DYnein Chain, light Intermediate	null	null	4699	0.247165	-0.136516	No
row_7	172041	Dynein Heavy Chain	null	null	5109	0.218588	-0.141915	No
row_8	174680	Tubulin alpha chain	null	null	5744	0.180844	-0.159452	No
row_9	178260	Dynein Light Intermediate chain	null	null	6366	0.146866	-0.176288	No
row_10	179680	Tubulin beta chain	null	null	6607	0.134875	-0.172569	No
row_11	179534	Actin-2	null	null	6655	0.132427	-0.158438	No
row_12	173167	Tubulin alpha-2 chain	null	null	6742	0.127961	-0.146411	No
row_13	176501	Tubulin beta chain	null	null	7945	0.061295	-0.194591	No
row_14	3564970	V-type proton ATPase catalytic subunit A	null	null	8638	0.0211845	-0.215257	Yes
row_15	174272	Vacuolar H ATPase	null	null	8679	0.0185258	-0.200748	Yes
row_16	177617	Hepatocyte Growth factor-Regulated TK Substrate (HRS) family	null	null	8721	0.0157394	-0.186293	Yes
row_17	174743	V-type proton ATPase subunit a	null	null	8762	0.0135392	-0.171785	Yes
row_18	179832	EEA1 (Early Endosome Antigen, Rab effector) homolog	null	null	8783	0.0124285	-0.156197	Yes
row_19	175519	Tubulin beta-2 chain	null	null	8791	0.0116868	-0.139908	Yes
row_20	176383	V-type proton ATPase 16 kDa proteolipid subunit 1	null	null	8843	0.0081585	-0.125993	Yes
row_21	176390	CalNeXin	null	null	9132	-0.0105932	-0.124863	Yes
row_22	176568	Tubulin alpha chain	null	null	9145	-0.0118617	-0.108844	Yes
row_23	174596	Probable V-type proton ATPase subunit F	null	null	9390	-0.0291556	-0.105341	Yes
row_24	176338	V-type proton ATPase subunit D	null	null	9467	-0.0344065	-0.0927744	Yes
row_25	179510	Protein transport protein Sec61 subunit gamma	null	null	9588	-0.044181	-0.0825816	Yes
row_26	180692	Probable V-type proton ATPase subunit B	null	null	9594	-0.0447767	-0.0661847	Yes
row_27	177017	V-type proton ATPase subunit C	null	null	9798	-0.058795	-0.0604697	Yes
row_28	172755	RAB family	null	null	9817	-0.0607623	-0.0447741	Yes
row_29	174834	RAB family	null	null	9886	-0.0651833	-0.031776	Yes
row_30	177103	Vacuolar H ATPase	null	null	9902	-0.066485	-0.0159185	Yes
row_31	177027	Protein transport protein Sec61 subunit beta	null	null	9915	-0.0671739	0.000100733	Yes
row_32	177757	V-type proton ATPase subunit e	null	null	9964	-0.0705651	0.0141778	Yes
row_33	177442	Vacuolar H ATPase	null	null	9972	-0.0711607	0.0304669	Yes
row_34	176257	Probable V-type proton ATPase 116 kDa subunit a	null	null	10062	-0.0768068	0.0423321	Yes
row_35	172280	Phosphatidylinositol 3-kinase catalytic subunit type 3	null	null	10305	-0.0931146	0.0459431	Yes
row_36	178407	yeast SEC homolog	null	null	10418	-0.102317	0.0565674	Yes
row_37	172216	Probable V-type proton ATPase subunit G	null	null	10507	-0.108326	0.0684866	Yes
row_38	172134	V-type proton ATPase subunit	null	null	10520	-0.108964	0.0845059	Yes
row_39	177111	Ras-related protein ced-10	null	null	10541	-0.110597	0.100094	Yes
row_40	177018	Description	null	null	10543	-0.110645	0.116706	Yes
row_41	172831	Tubulin alpha chain	null	null	10778	-0.125665	0.120749	Yes
row_42	179533	Description	null	null	10967	-0.140353	0.127273	Yes
row_43	181344	hypothetical protein	null	null	11241	-0.159057	0.129212	Yes
row_44	180534	Probable V-type proton ATPase subunit H 2	null	null	11766	-0.195544	0.117609	Yes
row_45	175504	Integrin beta pat-3	null	null	11807	-0.198424	0.132118	Yes
row_46	178997	Calreticulin	null	null	11913	-0.205481	0.14312	Yes
row_47	177626	V-type proton ATPase subunit a	null	null	11965	-0.20842	0.157035	Yes
row_48	180456	yeast SEC homolog	null	null	12225	-0.225715	0.159729	Yes
row_49	180912	LAMP family protein lmp-1	null	null	12677	-0.257265	0.152064	Yes
row_50	185538	Tubulin alpha chain	null	null	12890	-0.271217	0.157294	Yes
row_51	180767	Actin-4	null	null	13255	-0.293698	0.154323	Yes
row_52	172593	Cytoplasmic dynein 2 heavy chain 1	null	null	13452	-0.307293	0.160416	Yes
row_53	175461	Tubulin beta chain	null	null	13785	-0.328549	0.159171	Yes
row_54	181036	Tubulin beta-1 chain	null	null	15141	-0.422276	0.102737	Yes
row_55	175419	Detyrosinated tubulin alpha-3 chain	null	null	15331	-0.439031	0.109207	Yes
row_56	184569	Tubulin alpha chain	null	null	16415	-0.551084	0.0674472	Yes
row_57	172717	Tubulin alpha chain	null	null	16532	-0.567939	0.0778558	Yes
row_58	181170	Tubulin beta-4 chain	null	null	16746	-0.597148	0.0830313	Yes
row_59	191455	Tubulin alpha-8 chain	null	null	18445	-1.82774	0.00809241	Yes
NAME	POLYKETIDE SUGAR UNIT BIOSYNTHESIS	Description	GENE SYMBOL	GENE_TITLE	RANK IN GENE LIST	RANK METRIC SCORE	RUNNING ES	CORE ENRICHMENT
row_0	180896	hypothetical protein	null	null	15964	-0.49883	-0.358557	Yes
row_1	180525	hypothetical protein	null	null	16504	-0.564965	0.112456	Yes
NAME	TGF-BETA SIGNALING PATHWAY	Description	GENE SYMBOL	GENE_TITLE	RANK IN GENE LIST	RANK METRIC SCORE	RUNNING ES	CORE ENRICHMENT
row_0	174257	SKp1 Related (ubiquitin ligase complex component)	null	null	2384	0.510879	-0.102828	No
row_1	172773	SKp1 Related (ubiquitin ligase complex component)	null	null	3399	0.359156	-0.131829	No
row_2	260116	SKp1 Related (ubiquitin ligase complex component)	null	null	3832	0.316273	-0.129468	No
row_3	178214	Cullin-6	null	null	4063	0.295766	-0.116221	No
row_4	191762	SKp1 Related (ubiquitin ligase complex component)	null	null	4480	0.264231	-0.112998	No
row_5	175545	Mitogen-activated protein kinase mpk-1	null	null	6586	0.135949	-0.200791	Yes
row_6	179358	RING-box protein 1	null	null	6638	0.133262	-0.177898	Yes
row_7	180081	SKp1 Related (ubiquitin ligase complex component)	null	null	7534	0.0831851	-0.200487	Yes
row_8	180133	E2F-like (mammalian transcription factor)	null	null	7606	0.0785754	-0.178672	Yes
row_9	172249	Retinoblastoma-like protein homolog lin-35	null	null	8084	0.0533594	-0.178735	Yes
row_10	176554	Ribosomal protein S6 kinase beta	null	null	8831	0.00923085	-0.193295	Yes
row_11	180148	SKp1 Related (ubiquitin ligase complex component)	null	null	9315	-0.0242544	-0.193682	Yes
row_12	176466	Cullin-1	null	null	9359	-0.0267467	-0.170358	Yes
row_13	178117	Serine/threonine-protein phosphatase 2A catalytic subunit	null	null	9405	-0.0302805	-0.147142	Yes
row_14	172088	Rho-associated protein kinase let-502	null	null	9442	-0.03279	-0.123441	Yes
row_15	175750	Probable serine/threonine-protein phosphatase PP2A regulatory subunit	null	null	9531	-0.0398471	-0.102542	Yes
row_16	175815	Dwarfin sma-4	null	null	10018	-0.0739556	-0.103091	Yes
row_17	172775	Skp1-related protein	null	null	10663	-0.118583	-0.112153	Yes
row_18	178458	Ras-like GTP-binding protein rhoA	null	null	11760	-0.195109	-0.145574	Yes
row_19	191765	SKp1 Related (ubiquitin ligase complex component)	null	null	12110	-0.217943	-0.13874	Yes
row_20	175955	Dwarfin sma-3	null	null	12276	-0.229024	-0.12199	Yes
row_21	181445	SKp1 Related (ubiquitin ligase complex component)	null	null	12633	-0.253954	-0.115533	Yes
row_22	176380	Protein cbp-1	null	null	12908	-0.272299	-0.104657	Yes
row_23	179068	DPP/BMP-Like	null	null	12924	-0.273071	-0.0798247	Yes
row_24	181446	SKp1 Related (ubiquitin ligase complex component)	null	null	13016	-0.278548	-0.0590875	Yes
row_25	175781	Cell surface receptor daf-4	null	null	13145	-0.285418	-0.0403441	Yes
row_26	176229	Dwarfin sma-2	null	null	14357	-0.369296	-0.0799615	Yes
row_27	181447	SKp1 Related (ubiquitin ligase complex component)	null	null	14381	-0.371095	-0.0555599	Yes
row_28	180431	Dwarfin sma	null	null	15425	-0.446021	-0.0861241	Yes
row_29	174044	Serine/threonine-protein kinase sma-6	null	null	15941	-0.495152	-0.0882354	Yes
row_30	173729	SKp1 Related (ubiquitin ligase complex component)	null	null	16078	-0.510708	-0.0699231	Yes
row_31	3565956	hypothetical protein	null	null	16505	-0.565077	-0.0672384	Yes
row_32	178839	SKp1 Related (ubiquitin ligase complex component)	null	null	17544	-0.840097	-0.0975331	Yes
row_33	178494	SKp1 Related (ubiquitin ligase complex component)	null	null	17568	-0.848267	-0.0731315	Yes
row_34	178840	SKp1 Related (ubiquitin ligase complex component)	null	null	17649	-0.89357	-0.0518016	Yes
row_35	178495	SKp1 Related (ubiquitin ligase complex component)	null	null	17652	-0.895086	-0.0262683	Yes
row_36	178447	SKp1 Related (ubiquitin ligase complex component)	null	null	17748	-0.949722	-0.00574664	Yes
row_37	178496	SKp1 Related (ubiquitin ligase complex component)	null	null	17778	-0.967659	0.0183316	Yes
row_38	178493	SKp1 Related (ubiquitin ligase complex component)	null	null	17803	-0.980235	0.0426793	Yes
NAME	WNT SIGNALING PATHWAY	Description	GENE SYMBOL	GENE_TITLE	RANK IN GENE LIST	RANK METRIC SCORE	RUNNING ES	CORE ENRICHMENT
row_0	172498	Presenilin spe-4	null	null	1512	0.722865	-0.0679296	No
row_1	174257	SKp1 Related (ubiquitin ligase complex component)	null	null	2384	0.510879	-0.101254	No
row_2	172017	Presenilin hop-1	null	null	2426	0.505855	-0.0897684	No
row_3	187536	Putative serine/threonine-protein kinase R03D7.5	null	null	2657	0.46513	-0.0884868	No
row_4	172773	SKp1 Related (ubiquitin ligase complex component)	null	null	3399	0.359156	-0.114792	No
row_5	260116	SKp1 Related (ubiquitin ligase complex component)	null	null	3832	0.316273	-0.124416	No
row_6	178214	Cullin-6	null	null	4063	0.295766	-0.123135	No
row_7	179388	RuvB-like 1	null	null	4179	0.28523	-0.115644	No
row_8	191762	SKp1 Related (ubiquitin ligase complex component)	null	null	4480	0.264231	-0.118142	No
row_9	179217	Protein mom-2	null	null	6556	0.137452	-0.216466	No
row_10	179358	RING-box protein 1	null	null	6638	0.133262	-0.20714	No
row_11	174058	F-box/WD repeat-containing protein lin-23	null	null	6940	0.115678	-0.209692	No
row_12	172856	Protein mom-5	null	null	7467	0.0872625	-0.22439	Yes
row_13	180081	SKp1 Related (ubiquitin ligase complex component)	null	null	7534	0.0831851	-0.214255	Yes
row_14	175802	Armadillo repeat-containing protein wrm-1	null	null	7560	0.0816551	-0.201906	Yes
row_15	172842	Mitogen-activated protein kinase kinase kinase mom-4	null	null	7811	0.0675892	-0.201704	Yes
row_16	266854	DiSHevelled related	null	null	7825	0.0670366	-0.188707	Yes
row_17	180904	Protein-serine O-palmitoleoyltransferase porcupine	null	null	8429	0.0341804	-0.207563	Yes
row_18	172610	Casein kinase II subunit beta	null	null	8445	0.0331895	-0.194674	Yes
row_19	173338	Beta-catenin-like protein hmp-2	null	null	9041	-0.00436192	-0.213098	Yes
row_20	191169	Mitogen-activated protein kinase	null	null	9074	-0.00621454	-0.201126	Yes
row_21	180148	SKp1 Related (ubiquitin ligase complex component)	null	null	9315	-0.0242544	-0.200385	Yes
row_22	176466	Cullin-1	null	null	9359	-0.0267467	-0.189008	Yes
row_23	180982	Beta-catenin/armadillo-related protein 1	null	null	9577	-0.0432311	-0.187024	Yes
row_24	171677	hypothetical protein	null	null	9611	-0.0456003	-0.175107	Yes
row_25	178537	1-phosphatidylinositol 4,5-bisphosphate phosphodiesterase beta egl-8	null	null	9672	-0.0492959	-0.164648	Yes
row_26	190882	Uncharacterized protein	null	null	9763	-0.0554739	-0.155808	Yes
row_27	175815	Dwarfin sma-4	null	null	10018	-0.0739556	-0.155822	Yes
row_28	176866	GLH-binding kinase 1	null	null	10179	-0.0839972	-0.150761	Yes
row_29	175524	Casein kinase I isoform alpha	null	null	10279	-0.0913237	-0.142407	Yes
row_30	181166	Protein kinase C	null	null	10302	-0.0929225	-0.129896	Yes
row_31	177111	Ras-related protein ced-10	null	null	10541	-0.110597	-0.129047	Yes
row_32	172775	Skp1-related protein	null	null	10663	-0.118583	-0.12188	Yes
row_33	173287	Axin-like protein pry-1	null	null	10776	-0.125606	-0.114228	Yes
row_34	177138	E3 ubiquitin-protein ligase siah-1	null	null	10985	-0.141278	-0.111759	Yes
row_35	183461	hypothetical protein	null	null	11111	-0.150169	-0.104809	Yes
row_36	181344	hypothetical protein	null	null	11241	-0.159057	-0.0980743	Yes
row_37	176808	Serine/threonine kinase NLK	null	null	11313	-0.163899	-0.0882088	Yes
row_38	179572	CalciNeurin B	null	null	11502	-0.176538	-0.0846597	Yes
row_39	172978	Casein kinase II subunit alpha	null	null	11691	-0.190873	-0.0811106	Yes
row_40	178458	Ras-like GTP-binding protein rhoA	null	null	11760	-0.195109	-0.0710831	Yes
row_41	191765	SKp1 Related (ubiquitin ligase complex component)	null	null	12110	-0.217943	-0.0762259	Yes
row_42	177821	Uncharacterized protein	null	null	12348	-0.23358	-0.0753221	Yes
row_43	177921	Calcium/calmodulin-dependent protein kinase type II	null	null	12388	-0.236445	-0.063729	Yes
row_44	181445	SKp1 Related (ubiquitin ligase complex component)	null	null	12633	-0.253954	-0.0632032	Yes
row_45	176380	Protein cbp-1	null	null	12908	-0.272299	-0.064297	Yes
row_46	181446	SKp1 Related (ubiquitin ligase complex component)	null	null	13016	-0.278548	-0.056375	Yes
row_47	173149	Glycogen synthase kinase-3	null	null	13035	-0.279362	-0.0436481	Yes
row_48	177943	Serine/threonine-protein phosphatase 2B catalytic subunit	null	null	13047	-0.280546	-0.0305433	Yes
row_49	171832	hypothetical protein	null	null	13518	-0.311173	-0.0422185	Yes
row_50	173894	DiSHevelled related	null	null	13652	-0.319096	-0.0357002	Yes
row_51	3565407	cAMP-dependent protein kinase catalytic subunit	null	null	13669	-0.320074	-0.0228653	Yes
row_52	180441	Presenilin sel-12	null	null	13849	-0.333265	-0.0188304	Yes
row_53	181447	SKp1 Related (ubiquitin ligase complex component)	null	null	14381	-0.371095	-0.0337988	Yes
row_54	173399	Protein Wnt-1	null	null	14561	-0.384257	-0.0297638	Yes
row_55	174941	G1/S-specific cyclin-D	null	null	14879	-0.404955	-0.0331791	Yes
row_56	171849	Protein pop-1	null	null	15209	-0.427948	-0.0372421	Yes
row_57	180431	Dwarfin sma	null	null	15425	-0.446021	-0.0351507	Yes
row_58	177460	Stress-activated protein kinase jnk-1	null	null	15604	-0.461695	-0.0310617	Yes
row_59	177463	Drosophila PRicKLe homolog	null	null	15744	-0.4754	-0.0248673	Yes
row_60	186392	DAAM (Disheveled-Associated Activator of Morphogenesis) homolog	null	null	16007	-0.503204	-0.0253132	Yes
row_61	180853	C-terminal-binding protein 1	null	null	16026	-0.504982	-0.0125864	Yes
row_62	173729	SKp1 Related (ubiquitin ligase complex component)	null	null	16078	-0.510708	-0.00164108	Yes
row_63	177401	Secreted Frizzled-Related Protein	null	null	16434	-0.554251	-0.00710781	Yes
row_64	180579	Vang-like protein	null	null	16546	-0.568997	0.000598271	Yes
row_65	178768	Frizzled-2	null	null	16553	-0.570348	0.013973	Yes
row_66	178839	SKp1 Related (ubiquitin ligase complex component)	null	null	17544	-0.840097	-0.0257755	Yes
row_67	178494	SKp1 Related (ubiquitin ligase complex component)	null	null	17568	-0.848267	-0.0133185	Yes
row_68	178840	SKp1 Related (ubiquitin ligase complex component)	null	null	17649	-0.89357	-0.00393885	Yes
row_69	178495	SKp1 Related (ubiquitin ligase complex component)	null	null	17652	-0.895086	0.0096518	Yes
row_70	178447	SKp1 Related (ubiquitin ligase complex component)	null	null	17748	-0.949722	0.0182217	Yes
row_71	178496	SKp1 Related (ubiquitin ligase complex component)	null	null	17778	-0.967659	0.0303547	Yes
row_72	178493	SKp1 Related (ubiquitin ligase complex component)	null	null	17803	-0.980235	0.0427576	Yes
NAME	AUTOPHAGY - OTHER	Description	GENE SYMBOL	GENE_TITLE	RANK IN GENE LIST	RANK METRIC SCORE	RUNNING ES	CORE ENRICHMENT
row_0	182509	Mtor (MTOR) associated protein, LST8 homolog	null	null	3095	0.397543	-0.124982	No
row_1	190617	Protein Phosphatase Four Regulatory subunit	null	null	5028	0.223591	-0.187343	No
row_2	175793	Ubiquitin-like protein ATG12	null	null	5209	0.21201	-0.155368	No
row_3	183959	AuTophaGy (yeast Atg homolog)	null	null	6958	0.114809	-0.207822	Yes
row_4	178005	AuTophaGy (yeast Atg homolog)	null	null	6991	0.113244	-0.167878	Yes
row_5	177345	Beclin homolog	null	null	7353	0.0941136	-0.145649	Yes
row_6	171735	Autophagy protein 5	null	null	7547	0.0824163	-0.114375	Yes
row_7	176921	AuTophaGy (yeast Atg homolog)	null	null	7697	0.0728536	-0.0807309	Yes
row_8	177770	Uncharacterized protein	null	null	8416	0.0347015	-0.0777245	Yes
row_9	172167	Target of rapamycin homolog	null	null	8680	0.0184263	-0.050219	Yes
row_10	176150	Autophagy-related protein 13 homolog	null	null	9335	-0.0254808	-0.0437666	Yes
row_11	178117	Serine/threonine-protein phosphatase 2A catalytic subunit	null	null	9405	-0.0302805	-0.0058152	Yes
row_12	174827	related to yeast Vacuolar Protein Sorting factor	null	null	9714	-0.0521395	0.0192674	Yes
row_13	172280	Phosphatidylinositol 3-kinase catalytic subunit type 3	null	null	10305	-0.0931146	0.0291658	Yes
row_14	190777	Cysteine protease	null	null	10574	-0.112932	0.0564021	Yes
row_15	179246	AuTophaGy (yeast Atg homolog)	null	null	10817	-0.128564	0.0850384	Yes
row_16	174067	Autophagic-related protein 16.2	null	null	10861	-0.131278	0.12439	Yes
row_17	174050	Protein lgg-1	null	null	11234	-0.158636	0.146026	Yes
row_18	178561	AuTophaGy (yeast Atg homolog)	null	null	13304	-0.297157	0.0762887	Yes
row_19	3565022	Cysteine protease	null	null	13489	-0.309331	0.108048	Yes
row_20	177040	Ectopic P Granules	null	null	13539	-0.312721	0.147076	Yes
row_21	180311	Serine/threonine-protein kinase unc-51	null	null	13648	-0.318888	0.182928	Yes
row_22	180717	Autophagic-related protein 16.1	null	null	14298	-0.364778	0.189649	Yes
row_23	180949	AuTophaGy (yeast Atg homolog)	null	null	15730	-0.473791	0.154264	Yes
NAME	GLYCOSAMİNOGLYCAN DEGRADATİON	Description	GENE SYMBOL	GENE_TITLE	RANK IN GENE LIST	RANK METRIC SCORE	RUNNING ES	CORE ENRICHMENT
row_0	174383	Hyaluronidase	null	null	10528	-0.109751	-0.366296	Yes
row_1	188583	Beta-galactosidase	null	null	11544	-0.179635	-0.220892	Yes
row_2	173326	hypothetical protein	null	null	13614	-0.316592	-0.132182	Yes
row_3	180533	Beta-hexosaminidase A	null	null	16943	-0.640512	-0.111194	Yes
row_4	175063	hypothetical protein	null	null	17605	-0.866954	0.0532516	Yes
NAME	HİPPO SİGNALİNG PATHWAY -MULTİPLE SPECİES	Description	GENE SYMBOL	GENE_TITLE	RANK IN GENE LIST	RANK METRIC SCORE	RUNNING ES	CORE ENRICHMENT
row_0	3565400	Non-specific serine/threonine protein kinase	null	null	4670	0.249727	-0.174382	No
row_1	185482	Mps One Binder (Mats/MOB1) homolog	null	null	6478	0.141467	-0.194698	No
row_2	177511	Mps One Binder (Mats/MOB1) homolog	null	null	6911	0.117287	-0.141022	No
row_3	181267	Yes-associated protein homolog 1	null	null	7308	0.0967989	-0.0854089	No
row_4	172896	Serine/threonine-protein kinase WARTS homolog	null	null	11770	-0.196362	-0.248544	Yes
row_5	174005	Transcription enhancer factor-like protein egl-44	null	null	11795	-0.197858	-0.172912	Yes
row_6	181441	Mps One Binder (Mats/MOB1) homolog	null	null	11932	-0.20641	-0.103308	Yes
row_7	188402	SAlVador (cell proliferation regulator) homolog	null	null	12203	-0.223934	-0.0409141	Yes
row_8	180873	Serine/threonine-protein kinase pak-1	null	null	12800	-0.264862	0.00393661	Yes
row_9	179687	FERM domain (protein4.1-ezrin-radixin-moesin) family	null	null	13113	-0.283955	0.0640702	Yes
row_10	180707	Caenorhabditis STE20-like kinase	null	null	13117	-0.284213	0.140832	Yes
row_11	180708	Serine/threonine-protein kinase cst-1 37kDa subunit	null	null	13823	-0.331684	0.179817	Yes
row_12	187783	CaDHerin family	null	null	14648	-0.390132	0.212398	Yes
NAME	MİTOPHAGY - ANİMAL	Description	GENE SYMBOL	GENE_TITLE	RANK IN GENE LIST	RANK METRIC SCORE	RUNNING ES	CORE ENRICHMENT
row_0	176101	Mitochondrial import receptor subunit TOM7 homolog	null	null	2495	0.494212	-0.0998954	Yes
row_1	175310	Ubiquitin carboxyl-terminal hydrolase	null	null	4084	0.294108	-0.150941	Yes
row_2	174231	Serine/threonine-protein phosphatase Pgam5, mitochondrial	null	null	4556	0.258241	-0.141826	Yes
row_3	176816	E3 ubiquitin-protein ligase parkin	null	null	4621	0.253709	-0.11079	Yes
row_4	173990	Transmembrane GTPase fzo-1	null	null	6536	0.138801	-0.179393	Yes
row_5	177238	Mitochondrial Rho GTPase 1	null	null	6872	0.119594	-0.162953	Yes
row_6	177345	Beclin homolog	null	null	7353	0.0941136	-0.154323	Yes
row_7	171735	Autophagy protein 5	null	null	7547	0.0824163	-0.130235	Yes
row_8	180175	Ubiquitin Specific Protease	null	null	7884	0.0641332	-0.113849	Yes
row_9	172610	Casein kinase II subunit beta	null	null	8445	0.0331895	-0.109527	Yes
row_10	172981	Forkhead box protein O	null	null	8662	0.01967	-0.0866777	Yes
row_11	173918	Serine/threonine-protein kinase pink-1, mitochondrial	null	null	8977	0.000393874	-0.0691067	Yes
row_12	191169	Mitogen-activated protein kinase	null	null	9074	-0.00621454	-0.0397944	Yes
row_13	174834	RAB family	null	null	9886	-0.0651833	-0.0489912	Yes
row_14	181334	Eukaryotic translation initiation factor 2-alpha kinase pek-1	null	null	10157	-0.0824558	-0.0290504	Yes
row_15	176866	GLH-binding kinase 1	null	null	10179	-0.0839972	0.0043013	Yes
row_16	184409	Mitochondrial fission 1 protein	null	null	10236	-0.0879847	0.035768	Yes
row_17	174986	TBC (Tre-2/Bub2/Cdc16) domain family	null	null	10470	-0.105913	0.0577016	Yes
row_18	178104	Ras protein let-60	null	null	10559	-0.111544	0.0874447	Yes
row_19	174050	Protein lgg-1	null	null	11234	-0.158636	0.0856265	Yes
row_20	172978	Casein kinase II subunit alpha	null	null	11691	-0.190873	0.0955496	Yes
row_21	180359	HIF (Hypoxia Inducible Factor) homologa	null	null	11748	-0.194293	0.127016	Yes
row_22	171722	Tyrosine protein-kinase src-1	null	null	11911	-0.205289	0.152774	Yes
row_23	175625	R-RAS related	null	null	11988	-0.209773	0.183163	Yes
row_24	181576	ATF (cAMP-dependent transcription factor) family	null	null	12236	-0.226169	0.204343	Yes
row_25	178561	AuTophaGy (yeast Atg homolog)	null	null	13304	-0.297157	0.181358	Yes
row_26	174875	R-RAS related	null	null	13408	-0.303496	0.210293	Yes
row_27	181053	NIP3 homolog	null	null	14674	-0.39174	0.176645	No
row_28	177460	Stress-activated protein kinase jnk-1	null	null	15604	-0.461695	0.161092	No
NAME	RETİNOL METABOLİSM	Description	GENE SYMBOL	GENE_TITLE	RANK IN GENE LIST	RANK METRIC SCORE	RUNNING ES	CORE ENRICHMENT
row_0	178940	Putative UDP-glucuronosyltransferase ugt-48	null	null	3254	0.375424	-0.129737	No
row_1	175591	UDP-glucuronosyltransferase	null	null	3285	0.371182	-0.0858972	No
row_2	179772	Dehydrogenase/reductase SDR family member 4	null	null	6376	0.146564	-0.206804	Yes
row_3	179627	Alcohol dehydrogenase 1	null	null	7017	0.111652	-0.195806	Yes
row_4	185500	UDP-glucuronosyltransferase	null	null	7767	0.0698183	-0.190677	Yes
row_5	179540	Membrane Bound O-Acyl transferase, MBOAT	null	null	7797	0.0683693	-0.146784	Yes
row_6	183957	hypothetical protein	null	null	7866	0.0650749	-0.10499	Yes
row_7	178597	Alcohol dehydrogenase class-3	null	null	8488	0.03037	-0.0929696	Yes
row_8	179755	UDP-glucuronosyltransferase	null	null	9088	-0.00692038	-0.0797645	Yes
row_9	181205	UDP-glucuronosyltransferase	null	null	9754	-0.0547872	-0.0701127	Yes
row_10	178658	DeHydrogenases, Short chain	null	null	9833	-0.0617258	-0.0288575	Yes
row_11	181413	Putative UDP-glucuronosyltransferase ugt-50	null	null	10011	-0.0737451	0.00706757	Yes
row_12	172603	DeHydrogenases, Short chain	null	null	10380	-0.0989411	0.0327095	Yes
row_13	179578	DeHydrogenases, Short chain	null	null	10819	-0.128646	0.0545827	Yes
row_14	174507	Putative UDP-glucuronosyltransferase ugt-58	null	null	11526	-0.178618	0.0620271	Yes
row_15	188072	Putative UDP-glucuronosyltransferase ugt-55	null	null	12589	-0.250898	0.0503049	Yes
row_16	188073	Putative UDP-glucuronosyltransferase ugt-56	null	null	12951	-0.274181	0.0763237	Yes
row_17	183462	UDP-glucuronosyltransferase	null	null	13582	-0.315483	0.0878599	Yes
row_18	24104108	Probable aldehyde oxidase gad-3	null	null	14057	-0.348539	0.107795	Yes
row_19	179759	UDP-glucuronosyltransferase	null	null	14737	-0.396151	0.116693	Yes
row_20	180404	Putative UDP-glucuronosyltransferase ugt-46	null	null	14956	-0.411149	0.150411	Yes
row_21	179628	Alcohol dehydrogenase 2	null	null	18009	-1.10341	0.0315495	Yes
NAME	TAURİNE AND HYPOTAURİNE METABOLİSM	Description	GENE SYMBOL	GENE_TITLE	RANK IN GENE LIST	RANK METRIC SCORE	RUNNING ES	CORE ENRICHMENT
row_0	179271	hypothetical protein	null	null	9664	-0.0487279	-0.353183	Yes
row_1	171619	hypothetical protein	null	null	9946	-0.0693758	-0.201632	Yes
row_2	178453	Uncharacterized protein	null	null	11890	-0.203587	-0.139484	Yes
row_3	180434	Cysteine dioxygenase 1	null	null	12927	-0.273174	-0.0285458	Yes
row_4	180364	hypothetical protein	null	null	14982	-0.412321	0.0276314	Yes
row_5	176713	hypothetical protein	null	null	17398	-0.779123	0.0643895	Yes

## Sheet: SiO2vsControl_genes_for_top20
Supplementary data 3. KEGG pathway enrichment by GSEA
NAME	AUTOPHAGY - ANIMAL.xls	Description	GENE SYMBOL	GENE_TITLE	RANK IN GENE LIST	RANK METRIC SCORE	RUNNING ES	CORE ENRICHMENT
row_0	179637	Gut-specific cysteine proteinase	null	null	1276	0.880285	-0.0570372	No
row_1	178611	hypothetical protein	null	null	1302	0.87036	-0.0466205	No
row_2	185355	Cysteine PRotease related	null	null	1646	0.720575	-0.0533503	No
row_3	179053	Cathepsin B-like cysteine proteinase 4	null	null	2180	0.506323	-0.070325	No
row_4	179645	hypothetical protein	null	null	2607	0.401427	-0.0815302	No
row_5	176230	5'-AMP-activated protein kinase catalytic subunit alpha-1	null	null	3276	0.288705	-0.105784	No
row_6	178613	Cysteine PRotease related	null	null	3283	0.288235	-0.0943428	No
row_7	179815	hypothetical protein	null	null	3462	0.264739	-0.0921759	No
row_8	178612	Cathepsin B-like cysteine proteinase 5	null	null	4013	0.206658	-0.110067	No
row_9	182509	Mtor (MTOR) associated protein, LST8 homolog	null	null	4707	0.153545	-0.135669	No
row_10	191169	Mitogen-activated protein kinase	null	null	5028	0.137012	-0.141159	No
row_11	180947	Aspartic protease 3	null	null	5082	0.134535	-0.132252	No
row_12	175793	Ubiquitin-like protein ATG12	null	null	5785	0.100682	-0.158339	No
row_13	179424	Serine/threonine-protein kinase akt-1	null	null	5841	0.0977564	-0.14954	No
row_14	178084	RAs-related GTP binding protein C homolog	null	null	5967	0.093502	-0.144515	No
row_15	175545	Mitogen-activated protein kinase mpk-1	null	null	6117	0.0871766	-0.140784	No
row_16	174726	RAs-related GTP-binding protein A	null	null	6382	0.0773667	-0.143255	No
row_17	176866	GLH-binding kinase 1	null	null	6898	0.0615354	-0.159259	Yes
row_18	176712	Ectopic P granules protein 3	null	null	6914	0.0611091	-0.148303	Yes
row_19	172141	phosphoinositide kinase AdAPter subunit	null	null	7092	0.0553066	-0.146082	Yes
row_20	180111	CathePsin L family	null	null	7384	0.0447569	-0.150008	Yes
row_21	171872	Dual specificity mitogen-activated protein kinase kinase mek-2	null	null	7521	0.0400838	-0.145576	Yes
row_22	176233	Soluble NSF attachment protein 29	null	null	7651	0.0359479	-0.140767	Yes
row_23	174762	Phosphatidylinositol 3-kinase age-1	null	null	7818	0.0314548	-0.137953	Yes
row_24	190617	Protein Phosphatase Four Regulatory subunit	null	null	7933	0.027829	-0.132335	Yes
row_25	171735	Autophagy protein 5	null	null	7966	0.0268595	-0.122296	Yes
row_26	180185	Serine/threonine-protein kinase par-4	null	null	8352	0.0153667	-0.131291	Yes
row_27	176470	Ras-related protein Rab-33	null	null	8357	0.0150468	-0.119742	Yes
row_28	171769	Eukaryotic Initiation Factor	null	null	8369	0.0147482	-0.10857	Yes
row_29	183959	AuTophaGy (yeast Atg homolog)	null	null	8642	0.00660449	-0.111472	Yes
row_30	176554	Ribosomal protein S6 kinase beta	null	null	8848	0.00122049	-0.110761	Yes
row_31	172663	SYntaXin	null	null	8955	-0.00185791	-0.104711	Yes
row_32	181444	ASpartyl Protease	null	null	9070	-0.00492577	-0.0990935	Yes
row_33	177041	VAMP (Vesicle Associated Membrane Protein) homolog	null	null	9304	-0.0113953	-0.0998922	Yes
row_34	176921	AuTophaGy (yeast Atg homolog)	null	null	9307	-0.0114798	-0.0882353	Yes
row_35	177460	Stress-activated protein kinase jnk-1	null	null	9602	-0.0196081	-0.0923231	Yes
row_36	176869	Phosphatidylinositol 3,4,5-trisphosphate 3-phosphatase and dual-specificity protein phosphatase daf-18	null	null	9639	-0.0206231	-0.0824995	Yes
row_37	178117	Serine/threonine-protein phosphatase 2A catalytic subunit	null	null	9718	-0.0225427	-0.0749405	Yes
row_38	174305	IRE1 kinase related	null	null	9808	-0.0244003	-0.0679747	Yes
row_39	176825	Protein kinase C-like 1	null	null	9893	-0.0262595	-0.0607393	Yes
row_40	180931	Cathepsin B-like cysteine proteinase 6	null	null	10001	-0.0288575	-0.054744	Yes
row_41	174834	RAB family	null	null	10180	-0.0328786	-0.0525771	Yes
row_42	180978	Insulin receptor SubsTrate homolog	null	null	10350	-0.036945	-0.0499248	Yes
row_43	181524	Serine/threonine-protein kinase akt-2	null	null	10400	-0.0383149	-0.0408022	Yes
row_44	174953	Eukaryotic translation initiation factor 2-alpha kinase gcn-2	null	null	10476	-0.0402691	-0.0330815	Yes
row_45	172847	Ectopic P Granules	null	null	10596	-0.0435329	-0.0277333	Yes
row_46	172167	Target of rapamycin homolog	null	null	10729	-0.047685	-0.023086	Yes
row_47	177770	Uncharacterized protein	null	null	10929	-0.0539219	-0.0220514	Yes
row_48	177546	Inositol 1,4,5-trisphosphate receptor itr-1	null	null	11107	-0.0596912	-0.0198305	Yes
row_49	187322	DAP (Death-Associated Protein) Kinase homolog	null	null	11268	-0.0646756	-0.016693	Yes
row_50	172842	Mitogen-activated protein kinase kinase kinase mom-4	null	null	11435	-0.0698563	-0.013879	Yes
row_51	190882	Uncharacterized protein	null	null	11705	-0.0786762	-0.0166188	Yes
row_52	174875	R-RAS related	null	null	11862	-0.0838665	-0.0132656	Yes
row_53	176327	GTP-binding protein Rheb homolog 1	null	null	11901	-0.0852054	-0.00354983	Yes
row_54	190777	Cysteine protease	null	null	12019	-0.0889159	0.00190624	Yes
row_55	178104	Ras protein let-60	null	null	12041	-0.0895419	0.0125386	Yes
row_56	174050	Protein lgg-1	null	null	12183	-0.0938573	0.0167006	Yes
row_57	177345	Beclin homolog	null	null	12245	-0.0956579	0.0251762	Yes
row_58	178349	VAMP (Vesicle Associated Membrane Protein) homolog	null	null	12357	-0.0996638	0.0309558	Yes
row_59	3565407	cAMP-dependent protein kinase catalytic subunit	null	null	12388	-0.100805	0.0411029	Yes
row_60	178005	AuTophaGy (yeast Atg homolog)	null	null	12692	-0.112034	0.0365299	Yes
row_61	176150	Autophagy-related protein 13 homolog	null	null	12723	-0.11316	0.046677	Yes
row_62	189585	hypothetical protein	null	null	12787	-0.115723	0.0550447	Yes
row_63	179246	AuTophaGy (yeast Atg homolog)	null	null	12896	-0.119884	0.0609861	Yes
row_64	180359	HIF (Hypoxia Inducible Factor) homologa	null	null	12926	-0.120868	0.0711871	Yes
row_65	180667	hypothetical protein	null	null	12952	-0.121767	0.0816038	Yes
row_66	180475	3-phosphoinositide-dependent protein kinase 1	null	null	13072	-0.12613	0.086952	Yes
row_67	181727	5'-AMP-activated protein kinase catalytic subunit alpha-2	null	null	13144	-0.129134	0.0948884	Yes
row_68	174827	related to yeast Vacuolar Protein Sorting factor	null	null	13337	-0.137293	0.0963005	Yes
row_69	175490	Myotubularin-related protein 3	null	null	13393	-0.139776	0.1051	Yes
row_70	181334	Eukaryotic translation initiation factor 2-alpha kinase pek-1	null	null	13626	-0.150491	0.104355	Yes
row_71	178561	AuTophaGy (yeast Atg homolog)	null	null	14082	-0.173789	0.091586	Yes
row_72	172280	Phosphatidylinositol 3-kinase catalytic subunit type 3	null	null	14095	-0.17457	0.102704	Yes
row_73	177040	Ectopic P Granules	null	null	14684	-0.208612	0.0827634	Yes
row_74	181053	NIP3 homolog	null	null	14768	-0.213664	0.0900527	Yes
row_75	180912	LAMP family protein lmp-1	null	null	14773	-0.213986	0.101602	Yes
row_76	3565022	Cysteine protease	null	null	14839	-0.218277	0.109862	Yes
row_77	180996	Ectopic P Granules	null	null	14859	-0.220013	0.120602	Yes
row_78	180717	Autophagic-related protein 16.1	null	null	14913	-0.223797	0.129509	Yes
row_79	174067	Autophagic-related protein 16.2	null	null	15067	-0.233571	0.133024	Yes
row_80	180949	AuTophaGy (yeast Atg homolog)	null	null	15160	-0.240916	0.139828	Yes
row_81	180311	Serine/threonine-protein kinase unc-51	null	null	15188	-0.242554	0.150137	Yes
row_82	175625	R-RAS related	null	null	15893	-0.298437	0.123942	Yes
row_83	3565956	hypothetical protein	null	null	17367	-0.523363	0.0562823	Yes
row_84	180033	Cathepsin B-like cysteine proteinase 3	null	null	17737	-0.683746	0.0481506	Yes
NAME	AUTOPHAGY - OTHER.xls	Description	GENE SYMBOL	GENE_TITLE	RANK IN GENE LIST	RANK METRIC SCORE	RUNNING ES	CORE ENRICHMENT
row_0	182509	Mtor (MTOR) associated protein, LST8 homolog	null	null	4707	0.153545	-0.211303	No
row_1	175793	Ubiquitin-like protein ATG12	null	null	5785	0.100682	-0.227517	No
row_2	190617	Protein Phosphatase Four Regulatory subunit	null	null	7933	0.027829	-0.301237	Yes
row_3	171735	Autophagy protein 5	null	null	7966	0.0268595	-0.261291	Yes
row_4	183959	AuTophaGy (yeast Atg homolog)	null	null	8642	0.00660449	-0.255901	Yes
row_5	176921	AuTophaGy (yeast Atg homolog)	null	null	9307	-0.0114798	-0.249919	Yes
row_6	178117	Serine/threonine-protein phosphatase 2A catalytic subunit	null	null	9718	-0.0225427	-0.230287	Yes
row_7	172167	Target of rapamycin homolog	null	null	10729	-0.047685	-0.242901	Yes
row_8	177770	Uncharacterized protein	null	null	10929	-0.0539219	-0.21193	Yes
row_9	190777	Cysteine protease	null	null	12019	-0.0889159	-0.228789	Yes
row_10	174050	Protein lgg-1	null	null	12183	-0.0938573	-0.195883	Yes
row_11	177345	Beclin homolog	null	null	12245	-0.0956579	-0.157494	Yes
row_12	178005	AuTophaGy (yeast Atg homolog)	null	null	12692	-0.112034	-0.139797	Yes
row_13	176150	Autophagy-related protein 13 homolog	null	null	12723	-0.11316	-0.0997429	Yes
row_14	179246	AuTophaGy (yeast Atg homolog)	null	null	12896	-0.119884	-0.0673201	Yes
row_15	174827	related to yeast Vacuolar Protein Sorting factor	null	null	13337	-0.137293	-0.0493004	Yes
row_16	178561	AuTophaGy (yeast Atg homolog)	null	null	14082	-0.173789	-0.0476187	Yes
row_17	172280	Phosphatidylinositol 3-kinase catalytic subunit type 3	null	null	14095	-0.17457	-0.00659694	Yes
row_18	177040	Ectopic P Granules	null	null	14684	-0.208612	0.00346872	Yes
row_19	3565022	Cysteine protease	null	null	14839	-0.218277	0.0368589	Yes
row_20	180717	Autophagic-related protein 16.1	null	null	14913	-0.223797	0.0746023	Yes
row_21	174067	Autophagic-related protein 16.2	null	null	15067	-0.233571	0.108046	Yes
row_22	180949	AuTophaGy (yeast Atg homolog)	null	null	15160	-0.240916	0.144769	Yes
row_23	180311	Serine/threonine-protein kinase unc-51	null	null	15188	-0.242554	0.184984	Yes
NAME	BASAL TRANSCRIPTION FACTORS.xls	Description	GENE SYMBOL	GENE_TITLE	RANK IN GENE LIST	RANK METRIC SCORE	RUNNING ES	CORE ENRICHMENT
row_0	176584	human XPB (Xeroderma Pigmentosum complementation group B) related	null	null	4354	0.177732	-0.206371	Yes
row_1	178431	General transcription factor IIH subunit 4	null	null	4452	0.169918	-0.18381	Yes
row_2	176425	hypothetical protein	null	null	4573	0.161988	-0.162485	Yes
row_3	260198	TAF (TBP-associated transcription factor) family	null	null	5225	0.127288	-0.169717	Yes
row_4	190298	hypothetical protein	null	null	5400	0.117909	-0.151297	Yes
row_5	171784	Cyclin-dependent kinase 7	null	null	5781	0.100852	-0.143954	Yes
row_6	180243	General transcription factor IIF subunit 2	null	null	5826	0.0985075	-0.118543	Yes
row_7	172451	TAF (TBP-associated transcription factor) family	null	null	6015	0.0917364	-0.100875	Yes
row_8	175791	Transcription initiation factor IIA small chain homolog	null	null	6386	0.0772026	-0.0929954	Yes
row_9	173764	hypothetical protein	null	null	7348	0.0454933	-0.116898	Yes
row_10	175190	human XPD (Xeroderma Pigmentosum complementation group D) related	null	null	7669	0.0355429	-0.106329	Yes
row_11	176421	General transcription factor IIH subunit 2	null	null	7713	0.0347054	-0.080864	Yes
row_12	174524	TAF (TBP-associated transcription factor) family	null	null	8073	0.023471	-0.0723925	Yes
row_13	172552	TAF (TBP-associated transcription factor) family	null	null	8170	0.0206674	-0.0497774	Yes
row_14	178893	Prion-like-(Q/N-rich)-domain-bearing protein	null	null	8519	0.00953704	-0.0407144	Yes
row_15	176054	TATA-box-binding protein	null	null	8602	0.00763946	-0.0173464	Yes
row_16	190078	CYclin H	null	null	9218	-0.00940364	-0.022642	Yes
row_17	174765	Transcription initiation factor IIE subunit beta	null	null	9773	-0.0237214	-0.0246572	Yes
row_18	192052	TAF (TBP-associated transcription factor) family	null	null	9976	-0.0283597	-0.00774253	Yes
row_19	178502	Uncharacterized protein	null	null	10410	-0.0385234	-0.00325058	Yes
row_20	176838	Uncharacterized protein	null	null	10450	-0.0395663	0.0224299	Yes
row_21	192051	Transcription initiation factor TFIID subunit 2	null	null	10560	-0.0424129	0.0443459	Yes
row_22	178544	Transcription initiation factor IIB	null	null	10690	-0.0463909	0.0651863	Yes
row_23	176798	TAF (TBP-associated transcription factor) family	null	null	10892	-0.0529487	0.0821547	Yes
row_24	171630	TAF (TBP-associated transcription factor) family	null	null	11191	-0.0622764	0.0939067	Yes
row_25	172676	TBP-Like Factor	null	null	11423	-0.069531	0.109262	Yes
row_26	176682	Transcription initiation factor IIA subunit 2	null	null	12117	-0.0918386	0.0997714	Yes
row_27	3564983	Transcription initiation factor TFIID subunit 10	null	null	12686	-0.111683	0.0970034	Yes
row_28	173257	Transcription initiation factor TFIID subunit 1	null	null	12691	-0.11199	0.124566	Yes
row_29	176686	TAF (TBP-associated transcription factor) family	null	null	13324	-0.136736	0.118356	Yes
row_30	173602	MNAT (menage a trois) TFIIH subunit	null	null	14113	-0.17597	0.103757	Yes
row_31	192053	TAF (TBP-associated transcription factor) family	null	null	14483	-0.196467	0.111691	Yes
row_32	180698	TAF (TBP-associated transcription factor) family	null	null	14586	-0.202382	0.133983	Yes
row_33	173498	TAF (TBP-associated transcription factor) family	null	null	14723	-0.210559	0.154447	Yes
row_34	181704	TAF (TBP-associated transcription factor) family	null	null	14847	-0.218649	0.17561	Yes
row_35	174175	FUS/TLS RNA binding protein homolog	null	null	15597	-0.272971	0.163108	Yes
NAME	CALCIUM SIGNALING PATHWAY.xls	Description	GENE SYMBOL	GENE_TITLE	RANK IN GENE LIST	RANK METRIC SCORE	RUNNING ES	CORE ENRICHMENT
row_0	177648	Adenine Nucleotide Translocator	null	null	239	1.62407	0.00437324	No
row_1	186855	Adenine Nucleotide Translocator	null	null	1357	0.849995	-0.0385264	No
row_2	4363086	Peptidyl-prolyl cis-trans isomerase	null	null	2924	0.340747	-0.105601	No
row_3	183197	Sphingosine kinase 1	null	null	3473	0.263637	-0.117865	No
row_4	173929	NMDA class glutamate Receptor	null	null	5696	0.104061	-0.220259	No
row_5	177362	Calcium uniporter protein, mitochondrial	null	null	5780	0.100857	-0.207487	No
row_6	175221	ORAI (store-operated calcium channel) homolog	null	null	5793	0.100214	-0.190892	No
row_7	173200	Phosphodiesterase	null	null	6200	0.0842241	-0.19551	No
row_8	172914	Metabotropic GLutamate receptor family	null	null	6204	0.0841369	-0.17843	No
row_9	177858	Uncharacterized protein	null	null	6787	0.0650038	-0.192525	No
row_10	177525	Phosphoinositide phospholipase C	null	null	7008	0.0583856	-0.187128	No
row_11	177524	Probable voltage-dependent anion-selective channel	null	null	7073	0.0559155	-0.173333	No
row_12	177513	Uncharacterized protein	null	null	8425	0.012989	-0.228831	No
row_13	179572	CalciNeurin B	null	null	8777	0.00278155	-0.230488	Yes
row_14	174586	1-phosphatidylinositol 4,5-bisphosphate phosphodiesterase gamma plc-3	null	null	8908	-0.000396221	-0.220247	Yes
row_15	184917	hypothetical protein	null	null	8937	-0.00130001	-0.204513	Yes
row_16	177943	Serine/threonine-protein phosphatase 2B catalytic subunit	null	null	9706	-0.0223588	-0.228622	Yes
row_17	175341	CholecystoKinin Receptor homolog	null	null	9910	-0.026551	-0.22231	Yes
row_18	179080	hypothetical protein	null	null	9929	-0.027018	-0.206038	Yes
row_19	175893	G-protein-linked Acetylcholine Receptor	null	null	10147	-0.0321051	-0.20048	Yes
row_20	190101	hypothetical protein	null	null	10151	-0.0322224	-0.1834	Yes
row_21	177921	Calcium/calmodulin-dependent protein kinase type II	null	null	10592	-0.0434223	-0.189849	Yes
row_22	189112	Adenine Nucleotide Translocator	null	null	10618	-0.0441419	-0.173954	Yes
row_23	183056	Thyrotropin-Releasing Hormone Receptor	null	null	10680	-0.0459768	-0.159997	Yes
row_24	178614	CalMoDulin	null	null	10698	-0.0466006	-0.143671	Yes
row_25	175622	Adenylyl CYclase	null	null	10816	-0.0506299	-0.132729	Yes
row_26	179962	Muscarinic acetylcholine receptor gar-3	null	null	10936	-0.0540105	-0.121895	Yes
row_27	177546	Inositol 1,4,5-trisphosphate receptor itr-1	null	null	11107	-0.0596912	-0.113806	Yes
row_28	180565	SERotonin/octopamine receptor family	null	null	11303	-0.0661664	-0.107064	Yes
row_29	171687	G protein, Subunit Alpha	null	null	11433	-0.0697877	-0.0967682	Yes
row_30	176149	Probable phosphorylase b kinase regulatory subunit alpha	null	null	11632	-0.076319	-0.0901875	Yes
row_31	180922	Probable muscarinic acetylcholine receptor gar-1	null	null	11664	-0.0774206	-0.0746152	Yes
row_32	177092	Uncharacterized protein	null	null	11720	-0.0790778	-0.0603351	Yes
row_33	181045	Voltage-dependent T-type calcium channel subunit alpha	null	null	11974	-0.0874797	-0.0567156	Yes
row_34	188774	CholecystoKinin Receptor homolog	null	null	12215	-0.0947536	-0.0523962	Yes
row_35	178918	Na/Ca eXchangers	null	null	12311	-0.0981877	-0.0402698	Yes
row_36	3565407	cAMP-dependent protein kinase catalytic subunit	null	null	12388	-0.100805	-0.0271204	Yes
row_37	181274	1-phosphatidylinositol 4,5-bisphosphate phosphodiesterase epsilon-1	null	null	12641	-0.110226	-0.0234471	Yes
row_38	179715	CALmodulin related genes	null	null	12657	-0.110712	-0.00701334	Yes
row_39	181217	Myosin Light Chain Kinase related	null	null	12713	-0.112879	0.00726675	Yes
row_40	180318	Na/Ca eXchangers	null	null	12822	-0.117231	0.0186932	Yes
row_41	175201	Stromal interaction molecule 1	null	null	12849	-0.118112	0.0345347	Yes
row_42	182789	CALmodulin related genes	null	null	13005	-0.123933	0.0434307	Yes
row_43	178537	1-phosphatidylinositol 4,5-bisphosphate phosphodiesterase beta egl-8	null	null	13385	-0.139481	0.0402661	Yes
row_44	177089	Calcium-transporting ATPase	null	null	13523	-0.145815	0.0501312	Yes
row_45	181166	Protein kinase C	null	null	13783	-0.158466	0.0534276	Yes
row_46	177945	CALmodulin related genes	null	null	13787	-0.158654	0.0705074	Yes
row_47	171751	hypothetical protein	null	null	13888	-0.163702	0.0823646	Yes
row_48	176512	Calcium-transporting ATPase	null	null	14038	-0.171409	0.0915836	Yes
row_49	176773	Adenine Nucleotide Translocator	null	null	14247	-0.183312	0.0976259	Yes
row_50	172128	Inositol-trisphosphate 3-kinase homolog	null	null	14574	-0.201762	0.097315	Yes
row_51	181716	SERotonin/octopamine receptor family	null	null	14739	-0.211707	0.105726	Yes
row_52	174462	Receptor protein-tyrosine kinase	null	null	14971	-0.227525	0.11053	Yes
row_53	186916	hypothetical protein	null	null	15166	-0.241234	0.117326	Yes
row_54	180714	DOPamine receptor	null	null	15780	-0.288387	0.101563	Yes
row_55	177143	CALmodulin related genes	null	null	16086	-0.316631	0.102383	Yes
row_56	177795	Calcium-transporting ATPase	null	null	16891	-0.418823	0.0763353	Yes
row_57	183595	TachyKinin Receptor family	null	null	17452	-0.553838	0.0634254	Yes
NAME	ECM-RECEPTOR INTERACTION.xls	Description	GENE SYMBOL	GENE_TITLE	RANK IN GENE LIST	RANK METRIC SCORE	RUNNING ES	CORE ENRICHMENT
row_0	181708	Collagen alpha-2(IV) chain	null	null	8849	0.00119375	-0.350165	No
row_1	175504	Integrin beta pat-3	null	null	13448	-0.141913	-0.472064	Yes
row_2	3565243	AGRin (synaptic protein) homolog	null	null	13835	-0.1612	-0.367791	Yes
row_3	181283	DystroGlycaN	null	null	14646	-0.206272	-0.286286	Yes
row_4	177956	Laminin-like protein epi-1	null	null	15840	-0.294208	-0.225346	Yes
row_5	177292	LAMinin related. See also lmb-	null	null	15984	-0.306581	-0.108025	Yes
row_6	172952	LAMinin related. See also lmb-	null	null	16065	-0.314701	0.0126792	Yes
row_7	180980	Laminin-like protein lam-2	null	null	16183	-0.326041	0.131397	Yes
NAME	ENDOCYTOSIS.xls	Description	GENE SYMBOL	GENE_TITLE	RANK IN GENE LIST	RANK METRIC SCORE	RUNNING ES	CORE ENRICHMENT
row_0	183522	Probable actin-related protein 2/3 complex subunit 5	null	null	3831	0.224805	-0.197164	No
row_1	175823	RABaptiN (rab effector)	null	null	5083	0.134501	-0.255072	No
row_2	179832	EEA1 (Early Endosome Antigen, Rab effector) homolog	null	null	5545	0.111229	-0.270339	Yes
row_3	177764	Vacuolar protein sorting-associated protein 26	null	null	5683	0.104646	-0.268118	Yes
row_4	179520	related to yeast Vacuolar Protein Sorting factor	null	null	5702	0.103968	-0.259474	Yes
row_5	190399	Sorting NeXin	null	null	5842	0.0977221	-0.257361	Yes
row_6	178944	related to yeast Vacuolar Protein Sorting factor	null	null	6107	0.0875466	-0.261995	Yes
row_7	177603	RABenoSyn (trafficking protein) homolog	null	null	6247	0.0827998	-0.259883	Yes
row_8	189240	Sorting NeXin	null	null	6319	0.0799219	-0.2541	Yes
row_9	178217	Exchange factor for Arf-6	null	null	6478	0.0741135	-0.253012	Yes
row_10	175223	G protein-coupled receptor kinase 2	null	null	6528	0.0727334	-0.246042	Yes
row_11	172078	Endophilin-A homolog	null	null	6697	0.0677924	-0.245494	Yes
row_12	172369	human SPG (spastic paraplegia)	null	null	6710	0.0674026	-0.236526	Yes
row_13	174000	Vacuolar protein sorting-associated protein 35	null	null	6989	0.0589103	-0.241916	Yes
row_14	173985	Eps15 (endocytosis protein) Homologous Sequence	null	null	7017	0.0580287	-0.233758	Yes
row_15	176424	Vacuolar protein sorting-associated protein 29	null	null	7146	0.0531219	-0.231052	Yes
row_16	4363014	RAB family	null	null	7364	0.0451249	-0.233149	Yes
row_17	177616	WASP (actin cytoskeleton modulator) homolog	null	null	7414	0.0438298	-0.226178	Yes
row_18	179737	Increased Sodium Tolerance Related	null	null	7756	0.0335299	-0.234968	Yes
row_19	172264	Signal transducing adapter molecule 1	null	null	7798	0.0323255	-0.227566	Yes
row_20	171882	Actin-related protein 2/3 complex subunit 5	null	null	7799	0.032274	-0.217951	Yes
row_21	174442	hypothetical protein	null	null	7898	0.0292474	-0.213625	Yes
row_22	178507	Heat shock 70 kDa protein A	null	null	7928	0.0281047	-0.205575	Yes
row_23	182050	hypothetical protein	null	null	8115	0.0225061	-0.205999	Yes
row_24	176697	Probable actin-related protein 2/3 complex subunit 3	null	null	8279	0.0175861	-0.205181	Yes
row_25	173876	PhosphoLipase D	null	null	8418	0.0132497	-0.203015	Yes
row_26	179838	Caveolin-2	null	null	8505	0.0103153	-0.198041	Yes
row_27	176499	hypothetical protein	null	null	8546	0.00893063	-0.190585	Yes
row_28	179010	Receptor Mediated Endocytosis	null	null	8568	0.00861085	-0.182103	Yes
row_29	172643	hypothetical protein	null	null	8644	0.00651908	-0.176535	Yes
row_30	177617	Hepatocyte Growth factor-Regulated TK Substrate (HRS) family	null	null	8646	0.00645447	-0.166974	Yes
row_31	174908	related to yeast Vacuolar Protein Sorting factor	null	null	8699	0.00480993	-0.160165	Yes
row_32	173229	Vacuolar protein sorting-associated protein 28 homolog	null	null	8876	0.000505614	-0.16005	Yes
row_33	266836	Ras-related protein Rab-10	null	null	8978	-0.00258572	-0.155886	Yes
row_34	189590	related to yeast Vacuolar Protein Sorting factor	null	null	9058	-0.00455114	-0.150534	Yes
row_35	173863	related to yeast Vacuolar Protein Sorting factor	null	null	9068	-0.00484827	-0.141405	Yes
row_36	172528	hypothetical protein	null	null	9119	-0.00619864	-0.134488	Yes
row_37	172755	RAB family	null	null	9157	-0.00731121	-0.12687	Yes
row_38	179462	Cdc-42 Related Protein	null	null	9174	-0.00774059	-0.118118	Yes
row_39	175247	Probable actin-related protein 2/3 complex subunit 2	null	null	9182	-0.00797945	-0.108881	Yes
row_40	174091	related to yeast Vacuolar Protein Sorting factor	null	null	9228	-0.00966936	-0.101694	Yes
row_41	176560	RAB family	null	null	9242	-0.00997114	-0.0927804	Yes
row_42	177142	BRag/Iqsec/Schizo related Arf GEF family member	null	null	9320	-0.0118105	-0.0873211	Yes
row_43	174323	DAB (Drosophila disabled) homolog	null	null	9387	-0.0137578	-0.0812681	Yes
row_44	179242	related to yeast Vacuolar Protein Sorting factor	null	null	9416	-0.0144921	-0.073164	Yes
row_45	174848	CeNTaurin	null	null	9605	-0.0197237	-0.073696	Yes
row_46	172306	hypothetical protein	null	null	9841	-0.0249518	-0.0767648	Yes
row_47	174233	Cell division control protein 42 homolog	null	null	9847	-0.0250833	-0.0674193	Yes
row_48	173998	Rab-11 Family Interacting-Protein	null	null	9972	-0.0282643	-0.0644968	Yes
row_49	181428	PIP Kinase	null	null	10043	-0.0296627	-0.0586597	Yes
row_50	173143	related to yeast Vacuolar Protein Sorting factor	null	null	10141	-0.0319141	-0.0542799	Yes
row_51	177497	F-actin-capping protein subunit alpha	null	null	10159	-0.0323353	-0.0455821	Yes
row_52	180175	Ubiquitin Specific Protease	null	null	10161	-0.0324314	-0.0360207	Yes
row_53	191608	ADP-Ribosylation Factor related	null	null	10170	-0.0326428	-0.0268371	Yes
row_54	174834	RAB family	null	null	10180	-0.0328786	-0.0177075	Yes
row_55	173954	WASH complex subunit homolog 3	null	null	10216	-0.0337677	-0.00998126	Yes
row_56	182474	Tumor Susceptibility Gene homolog	null	null	10375	-0.0374278	-0.00889397	Yes
row_57	176179	Kinesin heavy chain	null	null	10631	-0.0445001	-0.0130423	Yes
row_58	182286	MVB (yeast MultiVesicular Body sorting factor) related	null	null	10697	-0.0465492	-0.00693529	Yes
row_59	175650	Probable actin-related protein 2/3 complex subunit 4	null	null	10700	-0.0466518	0.00257214	Yes
row_60	181212	G protein-coupled receptor kinase 1	null	null	10761	-0.0488755	0.00894901	Yes
row_61	172184	PIP Kinase	null	null	10801	-0.0502817	0.0164594	Yes
row_62	175672	Vacuolar-sorting protein SNF8	null	null	10825	-0.0507693	0.0248333	Yes
row_63	176410	Apoptosis-linked gene 2-interacting protein X 1	null	null	10837	-0.0512444	0.033855	Yes
row_64	174673	F-actin-capping protein subunit beta	null	null	10873	-0.0523342	0.0415812	Yes
row_65	190219	hypothetical protein	null	null	10886	-0.0527368	0.0505489	Yes
row_66	173914	Protein kinase C-like 3	null	null	10893	-0.0529615	0.0598404	Yes
row_67	173927	hypothetical protein	null	null	11073	-0.0586392	0.0597942	Yes
row_68	174010	hypothetical protein	null	null	11204	-0.062657	0.0623928	Yes
row_69	175783	Partitioning defective protein 3	null	null	11288	-0.065607	0.0675283	Yes
row_70	176140	GTP exchange factor for ARFs 1	null	null	11349	-0.0673555	0.0739052	Yes
row_71	174805	Description	null	null	11533	-0.0731136	0.0736431	Yes
row_72	171601	Ras-related protein rab-11.1	null	null	11614	-0.0758323	0.0789404	Yes
row_73	181644	Dynamin	null	null	11707	-0.0787474	0.0835901	Yes
row_74	175376	AP complex subunit beta	null	null	11732	-0.0797003	0.0919101	Yes
row_75	176434	Probable clathrin heavy chain 1	null	null	11741	-0.080003	0.101094	Yes
row_76	171654	related to yeast Vacuolar Protein Sorting factor	null	null	11819	-0.0824554	0.106553	Yes
row_77	175801	ADP-ribosylation factor 1-like 2	null	null	11840	-0.0831842	0.115089	Yes
row_78	171719	E3 ubiquitin-protein ligase	null	null	11889	-0.0848705	0.122113	Yes
row_79	180449	related to yeast Vacuolar Protein Sorting factor	null	null	11944	-0.0866661	0.128814	Yes
row_80	171801	Doa4-Independent Degradation, homologous to yeast Did2	null	null	12227	-0.0951022	0.123208	Yes
row_81	176609	hypothetical protein	null	null	12269	-0.0967347	0.130611	Yes
row_82	184091	AdaPtin, Small chain (clathrin associated complex)	null	null	12449	-0.102968	0.130565	Yes
row_83	173231	Arf-1 Guanine nucleotide Exchange Factor homolog	null	null	12469	-0.10363	0.139155	Yes
row_84	177797	AMPHiphysin homolog	null	null	12661	-0.110893	0.138461	Yes
row_85	171647	E3 ubiquitin-protein ligase	null	null	12779	-0.11554	0.141761	Yes
row_86	178458	Ras-like GTP-binding protein rhoA	null	null	12831	-0.117499	0.148624	Yes
row_87	176490	Arf-GAP with ANK repeat and PH domain-containing protein cnt-2	null	null	12858	-0.118538	0.156836	Yes
row_88	180667	hypothetical protein	null	null	12952	-0.121767	0.161431	Yes
row_89	181163	AdaPtin, Alpha chain (clathrin associated complex)	null	null	13042	-0.125193	0.166243	Yes
row_90	190025	Daf-16-Dependent Longevity (WT but not daf-16 lifespan increased)	null	null	13057	-0.125715	0.175103	Yes
row_91	3565442	ARp2/3 compleX component	null	null	13101	-0.127182	0.182397	Yes
row_92	173137	Partitioning defective protein 6	null	null	13130	-0.128604	0.190501	Yes
row_93	181577	EPsiN (endocytic protein) homolog	null	null	13487	-0.143812	0.180901	Yes
row_94	180713	AP-2 complex subunit mu	null	null	13665	-0.152391	0.180963	Yes
row_95	171722	Tyrosine protein-kinase src-1	null	null	13676	-0.152748	0.190039	Yes
row_96	180468	Sorting NeXin	null	null	13679	-0.152989	0.199546	Yes
row_97	171935	RAB family	null	null	14042	-0.171565	0.189622	Yes
row_98	180446	Probable beta-arrestin	null	null	14464	-0.195558	0.176514	Yes
row_99	180419	Suppressor of LIneage defect	null	null	14531	-0.198994	0.182567	Yes
row_100	3565569	hypothetical protein	null	null	14638	-0.20544	0.186461	Yes
row_101	174462	Receptor protein-tyrosine kinase	null	null	14971	-0.227525	0.178157	Yes
row_102	177815	Caveolin	null	null	16238	-0.333385	0.11944	Yes
row_103	172757	Heat Shock Protein	null	null	16803	-0.405783	0.0986129	Yes
NAME	HIPPO SIGNALING PATHWAY -MULTIPLE SPECIES.xls	Description	GENE SYMBOL	GENE_TITLE	RANK IN GENE LIST	RANK METRIC SCORE	RUNNING ES	CORE ENRICHMENT
row_0	3565400	Non-specific serine/threonine protein kinase	null	null	6357	0.0784535	-0.264521	No
row_1	177511	Mps One Binder (Mats/MOB1) homolog	null	null	6470	0.0742283	-0.193613	No
row_2	181267	Yes-associated protein homolog 1	null	null	10896	-0.053134	-0.354363	Yes
row_3	185482	Mps One Binder (Mats/MOB1) homolog	null	null	11515	-0.0721966	-0.310634	Yes
row_4	174005	Transcription enhancer factor-like protein egl-44	null	null	11623	-0.0760229	-0.239458	Yes
row_5	180707	Caenorhabditis STE20-like kinase	null	null	11718	-0.0790543	-0.167584	Yes
row_6	188402	SAlVador (cell proliferation regulator) homolog	null	null	13053	-0.125612	-0.162312	Yes
row_7	180873	Serine/threonine-protein kinase pak-1	null	null	13797	-0.159157	-0.125296	Yes
row_8	181441	Mps One Binder (Mats/MOB1) homolog	null	null	13999	-0.169313	-0.0591693	Yes
row_9	179687	FERM domain (protein4.1-ezrin-radixin-moesin) family	null	null	14102	-0.174881	0.0122752	Yes
row_10	180708	Serine/threonine-protein kinase cst-1 37kDa subunit	null	null	14166	-0.178511	0.0858144	Yes
row_11	172896	Serine/threonine-protein kinase WARTS homolog	null	null	14277	-0.184596	0.156829	Yes
row_12	187783	CaDHerin family	null	null	15275	-0.248846	0.180202	Yes
NAME	INOSITOL PHOSPHATE METABOLISM.xls	Description	GENE SYMBOL	GENE_TITLE	RANK IN GENE LIST	RANK METRIC SCORE	RUNNING ES	CORE ENRICHMENT
row_0	179839	hypothetical protein	null	null	2460	0.434028	-0.102868	No
row_1	191426	Kinase	null	null	5081	0.134535	-0.214339	No
row_2	172778	SAC1 PIP phosphatase (yeast Suppressor of ACtin) homolog	null	null	5993	0.0926319	-0.233913	Yes
row_3	183790	Uncharacterized protein	null	null	6100	0.088157	-0.210202	Yes
row_4	173241	Golgi-resident PAp (PAP) 3-Phosphatase homolog	null	null	7000	0.058616	-0.229131	Yes
row_5	177525	Phosphoinositide phospholipase C	null	null	7008	0.0583856	-0.200096	Yes
row_6	174844	Triosephosphate isomerase	null	null	7378	0.0448512	-0.190526	Yes
row_7	174762	Phosphatidylinositol 3-kinase age-1	null	null	7818	0.0314548	-0.18472	Yes
row_8	176757	MTM (myotubularin) family	null	null	8197	0.0195885	-0.175634	Yes
row_9	172148	Myotubularin-related protein 1	null	null	8203	0.0195002	-0.146491	Yes
row_10	172822	OCRL (Lowe's oculocerebrorenal syndrome protein) homolog	null	null	8257	0.0181549	-0.119929	Yes
row_11	173236	hypothetical protein	null	null	8810	0.00216792	-0.1202	Yes
row_12	180871	Probable type I inositol 1,4,5-trisphosphate 5-phosphatase	null	null	8815	0.00198757	-0.091003	Yes
row_13	174586	1-phosphatidylinositol 4,5-bisphosphate phosphodiesterase gamma plc-3	null	null	8908	-0.000396221	-0.0665382	Yes
row_14	174902	CDP-diacylglycerol--inositol 3-phosphatidyltransferase	null	null	8979	-0.00261302	-0.0408905	Yes
row_15	172620	hypothetical protein	null	null	9173	-0.0076328	-0.0218568	Yes
row_16	176869	Phosphatidylinositol 3,4,5-trisphosphate 3-phosphatase and dual-specificity protein phosphatase daf-18	null	null	9639	-0.0206231	-0.017449	Yes
row_17	176653	hypothetical protein	null	null	9734	-0.0229429	0.00690814	Yes
row_18	181428	PIP Kinase	null	null	10043	-0.0296627	0.0197581	Yes
row_19	178284	Synaptojanin	null	null	10267	-0.0351294	0.0371787	Yes
row_20	172477	Inositol monophosphatase ttx-7	null	null	10329	-0.0365551	0.0633103	Yes
row_21	172184	PIP Kinase	null	null	10801	-0.0502817	0.0673954	Yes
row_22	177970	INositol Polyphosphate-5-Phosphatase	null	null	11099	-0.0594097	0.0808369	Yes
row_23	175344	PIP Kinase	null	null	12519	-0.105777	0.033946	Yes
row_24	181274	1-phosphatidylinositol 4,5-bisphosphate phosphodiesterase epsilon-1	null	null	12641	-0.110226	0.0568514	Yes
row_25	174792	INOsitol-3-phosphate Synthase	null	null	12977	-0.122595	0.0682495	Yes
row_26	180443	PhosphoInositide Four Kinase (PI-4 Kinase)	null	null	13037	-0.125089	0.0944887	Yes
row_27	178537	1-phosphatidylinositol 4,5-bisphosphate phosphodiesterase beta egl-8	null	null	13385	-0.139481	0.105242	Yes
row_28	175490	Myotubularin-related protein 3	null	null	13393	-0.139776	0.134277	Yes
row_29	172280	Phosphatidylinositol 3-kinase catalytic subunit type 3	null	null	14095	-0.17457	0.125994	Yes
row_30	180770	hypothetical protein	null	null	14231	-0.182354	0.148147	Yes
row_31	172128	Inositol-trisphosphate 3-kinase homolog	null	null	14574	-0.201762	0.159169	Yes
row_32	174800	ALdehyde deHydrogenase	null	null	14989	-0.228671	0.166319	Yes
row_33	181618	Phosphatidylinositol 3-kinase piki-1	null	null	15473	-0.262813	0.169759	Yes
NAME	MAPK SIGNALING PATHWAY.xls	Description	GENE SYMBOL	GENE_TITLE	RANK IN GENE LIST	RANK METRIC SCORE	RUNNING ES	CORE ENRICHMENT
row_0	186939	Ras-related protein rac-2	null	null	626	1.17647	-0.0205796	No
row_1	181157	Guanine nucleotide-binding protein alpha-12 subunit	null	null	3703	0.237524	-0.173199	No
row_2	189074	SAPK/ERK kinase	null	null	3802	0.22855	-0.165323	No
row_3	176855	FiLamiN (actin binding protein) homolog	null	null	4018	0.206204	-0.163752	No
row_4	173880	Mitogen-activated protein kinase	null	null	4259	0.185043	-0.163529	No
row_5	191169	Mitogen-activated protein kinase	null	null	5028	0.137012	-0.191761	No
row_6	179424	Serine/threonine-protein kinase akt-1	null	null	5841	0.0977564	-0.222365	No
row_7	175545	Mitogen-activated protein kinase mpk-1	null	null	6117	0.0871766	-0.224028	No
row_8	3565400	Non-specific serine/threonine protein kinase	null	null	6357	0.0784535	-0.223751	No
row_9	176866	GLH-binding kinase 1	null	null	6898	0.0615354	-0.239696	No
row_10	191704	Lateral-signal-Induced Phosphatase	null	null	7159	0.0525145	-0.24055	Yes
row_11	171933	Calcium Channel, Beta subunit	null	null	7380	0.0448245	-0.239249	Yes
row_12	171872	Dual specificity mitogen-activated protein kinase kinase mek-2	null	null	7521	0.0400838	-0.233636	Yes
row_13	177436	Raf homolog serine/threonine-protein kinase	null	null	7810	0.0318249	-0.236	Yes
row_14	178507	Heat shock 70 kDa protein A	null	null	7928	0.0281047	-0.229147	Yes
row_15	181457	MaX-Like	null	null	7947	0.0275443	-0.21696	Yes
row_16	178306	Pelle/IL-1 receptor associated Kinase (IRAK)	null	null	8056	0.0240531	-0.209622	Yes
row_17	259649	Late endosomal/lysosomal adaptor, Mapk (MAPK) and mToR (MTOR) activator homolog	null	null	8067	0.0236783	-0.197003	Yes
row_18	177244	Uncharacterized protein	null	null	8303	0.0168821	-0.19651	Yes
row_19	177513	Uncharacterized protein	null	null	8425	0.012989	-0.189874	Yes
row_20	179572	CalciNeurin B	null	null	8777	0.00278155	-0.195632	Yes
row_21	179462	Cdc-42 Related Protein	null	null	9174	-0.00774059	-0.203817	Yes
row_22	177894	PDZ eXchange Factor	null	null	9203	-0.00885236	-0.192168	Yes
row_23	175862	Serine/threonine-protein kinase SULU	null	null	9530	-0.0174185	-0.196579	Yes
row_24	177460	Stress-activated protein kinase jnk-1	null	null	9602	-0.0196081	-0.187248	Yes
row_25	177943	Serine/threonine-protein phosphatase 2B catalytic subunit	null	null	9706	-0.0223588	-0.179641	Yes
row_26	172647	Putative ribosomal protein S6 kinase alpha-1	null	null	9812	-0.0244359	-0.172142	Yes
row_27	174233	Cell division control protein 42 homolog	null	null	9847	-0.0250833	-0.160816	Yes
row_28	172581	Putative ribosomal protein S6 kinase alpha-2	null	null	10310	-0.0359038	-0.172557	Yes
row_29	181524	Serine/threonine-protein kinase akt-2	null	null	10400	-0.0383149	-0.164196	Yes
row_30	176968	Cell death abnormality protein 2	null	null	10445	-0.0395157	-0.15341	Yes
row_31	185682	MAP kinase kinase mkk-4	null	null	10475	-0.0402324	-0.141815	Yes
row_32	177709	Ras-related protein Rap-1	null	null	10550	-0.0421588	-0.132645	Yes
row_33	179469	Protein phosphatase ppm-1	null	null	10572	-0.0428004	-0.120619	Yes
row_34	179557	MaX-Like	null	null	10600	-0.0436598	-0.108916	Yes
row_35	177610	Mitogen-activated protein kinase pmk-3	null	null	10920	-0.0537211	-0.11295	Yes
row_36	180263	Protein PHosphatase	null	null	11159	-0.0612504	-0.112619	Yes
row_37	181576	ATF (cAMP-dependent transcription factor) family	null	null	11377	-0.0682229	-0.111156	Yes
row_38	172842	Mitogen-activated protein kinase kinase kinase mom-4	null	null	11435	-0.0698563	-0.10107	Yes
row_39	174805	Description	null	null	11533	-0.0731136	-0.0931399	Yes
row_40	181556	TGF-beta-activated kinase 1 and MAP3K7-binding protein 1	null	null	11549	-0.0736529	-0.0807904	Yes
row_41	172246	MTK1/MEKK4 homolog	null	null	11673	-0.0777426	-0.0742614	Yes
row_42	190882	Uncharacterized protein	null	null	11705	-0.0786762	-0.0627743	Yes
row_43	180707	Caenorhabditis STE20-like kinase	null	null	11718	-0.0790543	-0.0502631	Yes
row_44	175954	mammalian ZAK kinase homolog	null	null	11835	-0.0831	-0.0433569	Yes
row_45	174875	R-RAS related	null	null	11862	-0.0838665	-0.0316002	Yes
row_46	177111	Ras-related protein ced-10	null	null	11869	-0.0840706	-0.0187657	Yes
row_47	181045	Voltage-dependent T-type calcium channel subunit alpha	null	null	11974	-0.0874797	-0.0112128	Yes
row_48	173904	Tyrosine-protein phosphatase vhp-1	null	null	11980	-0.0877483	0.00167568	Yes
row_49	178104	Ras protein let-60	null	null	12041	-0.0895419	0.0115999	Yes
row_50	178846	Son of sevenless homolog	null	null	12084	-0.0908547	0.0224943	Yes
row_51	3565407	cAMP-dependent protein kinase catalytic subunit	null	null	12388	-0.100805	0.0193224	Yes
row_52	181055	Sex muscle abnormal protein 5	null	null	12529	-0.106099	0.0249351	Yes
row_53	181289	Tyrosine-protein kinase receptor ver-3	null	null	13278	-0.134521	-0.00221957	Yes
row_54	176808	Serine/threonine kinase NLK	null	null	13359	-0.138593	0.00662682	Yes
row_55	181004	Dual specificity mitogen-activated protein kinase kinase mek-1	null	null	13460	-0.142522	0.0143953	Yes
row_56	175410	Insulin-like receptor subunit beta	null	null	13578	-0.148443	0.0212476	Yes
row_57	173128	Dual-Leucine zipper Kinase	null	null	13647	-0.151572	0.0307408	Yes
row_58	181166	Protein kinase C	null	null	13783	-0.158466	0.036623	Yes
row_59	180873	Serine/threonine-protein kinase pak-1	null	null	13797	-0.159157	0.0490803	Yes
row_60	181344	hypothetical protein	null	null	13973	-0.167941	0.0528067	Yes
row_61	177611	Mitogen-activated protein kinase	null	null	14123	-0.176303	0.0579344	Yes
row_62	191743	Mitogen-activated protein kinase pmk-1	null	null	14145	-0.177372	0.0699606	Yes
row_63	180708	Serine/threonine-protein kinase cst-1 37kDa subunit	null	null	14166	-0.178511	0.0820406	Yes
row_64	180446	Probable beta-arrestin	null	null	14464	-0.195558	0.079192	Yes
row_65	174623	MAP kinase-interacting serine/threonine-protein kinase mnk-1	null	null	14477	-0.196188	0.0917032	Yes
row_66	3565569	hypothetical protein	null	null	14638	-0.20544	0.0962381	Yes
row_67	181168	FiLamiN (actin binding protein) homolog	null	null	14733	-0.211163	0.10433	Yes
row_68	181043	Dual specificity mitogen-activated protein kinase kinase sek-1	null	null	14808	-0.216203	0.1135	Yes
row_69	174462	Receptor protein-tyrosine kinase	null	null	14971	-0.227525	0.117927	Yes
row_70	175909	Protein let-756	null	null	15134	-0.238679	0.122354	Yes
row_71	177016	Uncharacterized protein	null	null	15550	-0.269146	0.113146	Yes
row_72	24104671	Mitogen-activated protein kinase kinase kinase nsy-1	null	null	15599	-0.273061	0.123717	Yes
row_73	175625	R-RAS related	null	null	15893	-0.298437	0.121084	Yes
row_74	175182	Protein ver-1	null	null	16624	-0.381161	0.0948992	Yes
row_75	172757	Heat Shock Protein	null	null	16803	-0.405783	0.098464	Yes
NAME	MITOPHAGY - ANIMAL.xls	Description	GENE SYMBOL	GENE_TITLE	RANK IN GENE LIST	RANK METRIC SCORE	RUNNING ES	CORE ENRICHMENT
row_0	179938	Nuclear RNA export factor 2	null	null	4730	0.152338	-0.240329	No
row_1	175442	CLeavage/Polyadenylation Factor Ia subunit	null	null	4998	0.138498	-0.24022	No
row_2	171696	Regulator of nonsense transcripts 1	null	null	5723	0.103084	-0.264732	Yes
row_3	182875	mRNA cap guanine-N7 methyltransferase	null	null	5746	0.102098	-0.251425	Yes
row_4	177435	Suppressor with Morphological effect on Genitalia	null	null	5891	0.0964117	-0.24469	Yes
row_5	172657	Cleavage Factor IM (CFIm) homolog	null	null	5946	0.0943732	-0.233106	Yes
row_6	179526	Protein Phosphatase 2A (Two A) Regulatory subunit	null	null	6394	0.0767381	-0.242695	Yes
row_7	188661	hypothetical protein	null	null	6481	0.0740731	-0.232835	Yes
row_8	179537	Eukaryotic Release FActor homolog	null	null	6506	0.0733974	-0.219635	Yes
row_9	179028	Eukaryotic peptide chain release factor subunit 1	null	null	6683	0.068206	-0.214624	Yes
row_10	177738	Ref/ALY RNA export adaptor family	null	null	6850	0.0626195	-0.209074	Yes
row_11	179371	Suppressor with Morphological effect on Genitalia	null	null	7324	0.0469088	-0.220064	Yes
row_12	174546	Uncharacterized ATP-dependent helicase C05C10.2	null	null	7447	0.0426544	-0.212144	Yes
row_13	177397	Suppressor with Morphological effect on Genitalia	null	null	7650	0.0359557	-0.208533	Yes
row_14	178151	Cleavage and Polyadenylation Specificity Factor	null	null	7749	0.0336977	-0.19932	Yes
row_15	179103	Probable cleavage and polyadenylation specificity factor subunit 2	null	null	7815	0.0315428	-0.188329	Yes
row_16	177561	Set1 WD40 repeat protein homolog	null	null	7913	0.02843	-0.179062	Yes
row_17	172826	Serine/threonine-protein phosphatase 2A regulatory subunit sur-6	null	null	8039	0.0244266	-0.171304	Yes
row_18	182490	SYMpleKin cleavage and polyadenylation factor	null	null	8427	0.0128838	-0.17766	Yes
row_19	172814	mRNA guanylyltransferase	null	null	8606	0.00747075	-0.172757	Yes
row_20	179783	PiNiN nuclear speckle-associated protein and splicing factor homolog	null	null	8683	0.00526611	-0.162358	Yes
row_21	174378	Cleavage and Polyadenylation Factor	null	null	8761	0.00306153	-0.152014	Yes
row_22	171866	NTF2-related eXporT protein	null	null	8972	-0.00245499	-0.148835	Yes
row_23	173073	Protein mago nashi homolog	null	null	9114	-0.00608532	-0.141938	Yes
row_24	188472	SSU (yeast Suppressor of SUa7) Protein homolog	null	null	9331	-0.0121176	-0.139082	Yes
row_25	178117	Serine/threonine-protein phosphatase 2A catalytic subunit	null	null	9718	-0.0225427	-0.145384	Yes
row_26	179486	Serine/threonine-protein phosphatase PP1-alpha	null	null	9956	-0.0277985	-0.14366	Yes
row_27	177710	Cleavage Factor IM (CFIm) homolog	null	null	9968	-0.0280962	-0.129759	Yes
row_28	174380	SUppressor-of-Forked (Drosophila) homolog	null	null	10290	-0.0355137	-0.13256	Yes
row_29	172030	ACINus (mammalian Apoptotic Chromatin condensation Inducer in the Nucleus) homolog	null	null	10340	-0.0367603	-0.120707	Yes
row_30	172418	Serine/threonine-protein kinase smg-1	null	null	10359	-0.0370315	-0.107184	Yes
row_31	177283	Uncharacterized protein	null	null	10395	-0.0381689	-0.0945769	Yes
row_32	175092	Polyadenylation Factor Subunit homolog	null	null	10462	-0.039945	-0.0836398	Yes
row_33	177003	Cleavage and Polyadenylation Specificity Factor	null	null	10625	-0.0443356	-0.0778745	Yes
row_34	246008	Polyadenylation and cleavage factor homolog 11	null	null	10634	-0.0445654	-0.0638128	Yes
row_35	174333	Spliceosome RNA helicase DDX39B homolog	null	null	10751	-0.0484948	-0.0555693	Yes
row_36	184953	Nuclear cap-binding protein subunit 2	null	null	10769	-0.0492157	-0.0419924	Yes
row_37	172768	PolyA Binding Protein (nuclear)	null	null	10790	-0.0499971	-0.0285771	Yes
row_38	175750	Probable serine/threonine-protein phosphatase PP2A regulatory subunit	null	null	10900	-0.0531897	-0.0199566	Yes
row_39	187888	Protein pelota homolog	null	null	10960	-0.0546537	-0.00864238	Yes
row_40	172672	hypothetical protein	null	null	11059	-0.0582178	0.00057077	Yes
row_41	176742	Cleavage and Polyadenylation Factor	null	null	11124	-0.060223	0.0116156	Yes
row_42	172258	hypothetical protein	null	null	11206	-0.0626843	0.0217446	Yes
row_43	3564807	Serine/threonine-protein phosphatase PP1-beta	null	null	11403	-0.069042	0.0256782	Yes
row_44	172920	PolyA Binding protein	null	null	11566	-0.0740286	0.0314434	Yes
row_45	178285	Cleavage and Polyadenylation Specificity Factor	null	null	11626	-0.0760349	0.0427576	Yes
row_46	172345	Nuclear cap-binding protein subunit 1	null	null	11630	-0.0762253	0.0570888	Yes
row_47	175367	Suppressor with Morphological effect on Genitalia	null	null	11763	-0.0806499	0.0644702	Yes
row_48	175572	RNA-binding protein 8A	null	null	11834	-0.0830852	0.0751918	Yes
row_49	179458	Poly-A Polymerase	null	null	11868	-0.0839572	0.0879068	Yes
row_50	191736	Nuclear RNA export factor 1	null	null	11994	-0.088002	0.0956653	Yes
row_51	178157	Ref/ALY RNA export adaptor family	null	null	12035	-0.0894346	0.108003	Yes
row_52	175534	Probable histone deacetylase complex subunit SAP18	null	null	12063	-0.0902874	0.121041	Yes
row_53	172886	Serine/threonine-protein phosphatase 2A regulatory subunit rsa-1	null	null	12454	-0.103163	0.114523	Yes
row_54	175244	RNP (RRM RNA binding domain) containing	null	null	12797	-0.116132	0.110591	Yes
row_55	175514	MuSashI (fly neural) family	null	null	12823	-0.117309	0.123737	Yes
row_56	178835	Factor Interacting with Poly(A) Polymerase	null	null	13211	-0.131652	0.117381	Yes
row_57	180100	Serine/threonine-protein phosphatase 2A regulatory subunit pptr-1	null	null	13374	-0.139101	0.123146	Yes
row_58	190485	hypothetical protein	null	null	13742	-0.156406	0.117867	Yes
row_59	179760	hypothetical protein	null	null	13858	-0.16256	0.126165	Yes
row_60	177735	Ref/ALY RNA export adaptor family	null	null	14233	-0.1824	0.120509	Yes
row_61	173203	hypothetical protein	null	null	14323	-0.187287	0.130207	Yes
row_62	173013	SR protein related	null	null	14340	-0.188396	0.143838	Yes
row_63	173922	Putative RNA-binding protein EEED8.12	null	null	14523	-0.198644	0.148525	Yes
row_64	181473	Polyadenylate-binding protein	null	null	15152	-0.240187	0.129186	Yes
row_65	173921	Putative RNA-binding protein EEED8.4	null	null	16195	-0.32689	0.0875421	Yes
row_66	174816	hypothetical protein	null	null	16714	-0.392742	0.0741284	Yes
row_67	177260	Uncharacterized protein	null	null	16996	-0.436799	0.0734827	Yes
row_68	174513	hypothetical protein	null	null	17484	-0.563578	0.0617391	Yes
NAME	MRNA SURVEILLANCE PATHWAY.xls	Description	GENE SYMBOL	GENE_TITLE	RANK IN GENE LIST	RANK METRIC SCORE	RUNNING ES	CORE ENRICHMENT
row_0	176101	Mitochondrial import receptor subunit TOM7 homolog	null	null	3182	0.30087	-0.136574	No
row_1	174231	Serine/threonine-protein phosphatase Pgam5, mitochondrial	null	null	4594	0.16098	-0.177943	No
row_2	191169	Mitogen-activated protein kinase	null	null	5028	0.137012	-0.166738	No
row_3	176866	GLH-binding kinase 1	null	null	6898	0.0615354	-0.232728	No
row_4	175310	Ubiquitin carboxyl-terminal hydrolase	null	null	7800	0.0322686	-0.246681	Yes
row_5	171735	Autophagy protein 5	null	null	7966	0.0268595	-0.221068	Yes
row_6	176816	E3 ubiquitin-protein ligase parkin	null	null	8481	0.0115591	-0.214217	Yes
row_7	177238	Mitochondrial Rho GTPase 1	null	null	9292	-0.0112498	-0.223278	Yes
row_8	173990	Transmembrane GTPase fzo-1	null	null	9479	-0.0162495	-0.198794	Yes
row_9	177460	Stress-activated protein kinase jnk-1	null	null	9602	-0.0196081	-0.17087	Yes
row_10	180175	Ubiquitin Specific Protease	null	null	10161	-0.0324314	-0.166384	Yes
row_11	174834	RAB family	null	null	10180	-0.0328786	-0.132869	Yes
row_12	172610	Casein kinase II subunit beta	null	null	11032	-0.0570823	-0.144134	Yes
row_13	181576	ATF (cAMP-dependent transcription factor) family	null	null	11377	-0.0682229	-0.128143	Yes
row_14	174875	R-RAS related	null	null	11862	-0.0838665	-0.119679	Yes
row_15	178104	Ras protein let-60	null	null	12041	-0.0895419	-0.0947655	Yes
row_16	173918	Serine/threonine-protein kinase pink-1, mitochondrial	null	null	12133	-0.0923504	-0.0651747	Yes
row_17	174050	Protein lgg-1	null	null	12183	-0.0938573	-0.033326	Yes
row_18	177345	Beclin homolog	null	null	12245	-0.0956579	-0.00212249	Yes
row_19	174986	TBC (Tre-2/Bub2/Cdc16) domain family	null	null	12917	-0.120579	-0.00371113	Yes
row_20	180359	HIF (Hypoxia Inducible Factor) homologa	null	null	12926	-0.120868	0.0303416	Yes
row_21	172981	Forkhead box protein O	null	null	13319	-0.136531	0.0437513	Yes
row_22	181334	Eukaryotic translation initiation factor 2-alpha kinase pek-1	null	null	13626	-0.150491	0.0617842	Yes
row_23	171722	Tyrosine protein-kinase src-1	null	null	13676	-0.152748	0.0936329	Yes
row_24	172978	Casein kinase II subunit alpha	null	null	13805	-0.159551	0.121235	Yes
row_25	178561	AuTophaGy (yeast Atg homolog)	null	null	14082	-0.173789	0.14088	Yes
row_26	184409	Mitochondrial fission 1 protein	null	null	14732	-0.211057	0.140474	Yes
row_27	181053	NIP3 homolog	null	null	14768	-0.213664	0.173076	Yes
row_28	175625	R-RAS related	null	null	15893	-0.298437	0.147135	Yes
NAME	NEUROACTIVE LIGAND-RECEPTOR INTERACTION.xls	Description	GENE SYMBOL	GENE_TITLE	RANK IN GENE LIST	RANK METRIC SCORE	RUNNING ES	CORE ENRICHMENT
row_0	3565335	Ligand-Gated ion Channel	null	null	1955	0.589245	-0.0728495	No
row_1	191707	Metabotropic GLutamate receptor family	null	null	4812	0.147381	-0.19414	No
row_2	191240	GABA B receptor subunit	null	null	5608	0.108234	-0.204624	No
row_3	173929	NMDA class glutamate Receptor	null	null	5696	0.104061	-0.177043	No
row_4	172914	Metabotropic GLutamate receptor family	null	null	6204	0.0841369	-0.172043	No
row_5	183715	Dopamine receptor 4	null	null	7251	0.0492719	-0.196022	No
row_6	7040157	hypothetical protein	null	null	7302	0.0476886	-0.166452	No
row_7	188499	Dopamine receptor 3	null	null	9051	-0.00438996	-0.228172	No
row_8	175341	CholecystoKinin Receptor homolog	null	null	9910	-0.026551	-0.242043	Yes
row_9	176472	hypothetical protein	null	null	10122	-0.0313851	-0.221129	Yes
row_10	175893	G-protein-linked Acetylcholine Receptor	null	null	10147	-0.0321051	-0.190161	Yes
row_11	189837	GABA B receptor subunit	null	null	10386	-0.037945	-0.170699	Yes
row_12	183056	Thyrotropin-Releasing Hormone Receptor	null	null	10680	-0.0459768	-0.154194	Yes
row_13	179347	DOPamine receptor	null	null	10925	-0.0538483	-0.135054	Yes
row_14	179962	Muscarinic acetylcholine receptor gar-3	null	null	10936	-0.0540105	-0.103333	Yes
row_15	176694	Ligand-Gated ion Channel	null	null	11047	-0.0574617	-0.0769893	Yes
row_16	180002	NMDA class glutamate Receptor	null	null	11071	-0.0585941	-0.0459678	Yes
row_17	175783	Partitioning defective protein 3	null	null	11288	-0.065607	-0.0253226	Yes
row_18	180565	SERotonin/octopamine receptor family	null	null	11303	-0.0661664	0.00618278	Yes
row_19	176691	Gamma-aminobutyric acid receptor subunit beta	null	null	11595	-0.075152	0.0227957	Yes
row_20	180922	Probable muscarinic acetylcholine receptor gar-1	null	null	11664	-0.0774206	0.0513978	Yes
row_21	181598	SEcretin/class B GPCR	null	null	11856	-0.0837504	0.0733871	Yes
row_22	188774	CholecystoKinin Receptor homolog	null	null	12215	-0.0947536	0.0863978	Yes
row_23	3565717	Ligand-Gated ion Channel	null	null	13266	-0.133989	0.0622043	Yes
row_24	177327	Metabotropic GLutamate receptor family	null	null	13613	-0.149983	0.0758602	Yes
row_25	175322	SERotonin/octopamine receptor family	null	null	14313	-0.186594	0.0705376	Yes
row_26	181716	SERotonin/octopamine receptor family	null	null	14739	-0.211707	0.0799462	Yes
row_27	180714	DOPamine receptor	null	null	15780	-0.288387	0.0562903	Yes
row_28	173398	NMUR (NeuroMedin U Receptor) homolog	null	null	16002	-0.30829	0.0766666	Yes
row_29	186230	human GoNadotropin-Releasing hormone Receptor (GnRHR) related	null	null	16801	-0.405338	0.0660215	Yes
row_30	183595	TachyKinin Receptor family	null	null	17452	-0.553838	0.0633333	Yes
NAME	NOTCH SIGNALING PATHWAY.xls	Description	GENE SYMBOL	GENE_TITLE	RANK IN GENE LIST	RANK METRIC SCORE	RUNNING ES	CORE ENRICHMENT
row_0	172498	Presenilin spe-4	null	null	1283	0.877401	-0.0163024	No
row_1	172017	Presenilin hop-1	null	null	5350	0.120337	-0.182132	No
row_2	180853	C-terminal-binding protein 1	null	null	8343	0.0156203	-0.290257	No
row_3	180367	NUMb related	null	null	9408	-0.0143788	-0.294793	No
row_4	173074	Histone deacetylase	null	null	10707	-0.0468342	-0.311901	Yes
row_5	172747	Gamma-secretase subunit aph-1	null	null	11135	-0.0605379	-0.282212	Yes
row_6	179598	mammalian SKIP (Ski interacting protein) homolog	null	null	11240	-0.06381	-0.235168	Yes
row_7	171920	P300/CBP Associated Factor homolog	null	null	11678	-0.0778231	-0.206016	Yes
row_8	181041	ADAM (disintegrin plus metalloprotease) family	null	null	11925	-0.0861533	-0.166602	Yes
row_9	179959	Histone deacetylase 1	null	null	11939	-0.0865191	-0.114669	Yes
row_10	177373	Lin-12 And Glp-1 phenotype	null	null	12089	-0.0910856	-0.0700425	Yes
row_11	172225	CIR (transcription factor CBF1 Interacting coRepressor) homolog	null	null	12251	-0.0959594	-0.0260613	Yes
row_12	176565	Gamma-secretase subunit pen-2	null	null	12437	-0.102535	0.0166305	Yes
row_13	172905	Nicastrin	null	null	12637	-0.110186	0.05857	Yes
row_14	266854	DiSHevelled related	null	null	12738	-0.113901	0.105829	Yes
row_15	174285	Putative histone deacetylase 2	null	null	13363	-0.138669	0.124934	Yes
row_16	173894	DiSHevelled related	null	null	13683	-0.153085	0.160426	Yes
row_17	176380	Protein cbp-1	null	null	14527	-0.198748	0.167764	Yes
row_18	180441	Presenilin sel-12	null	null	15334	-0.252674	0.17709	Yes
NAME	PHAGOSOME.xls	Description	GENE SYMBOL	GENE_TITLE	RANK IN GENE LIST	RANK METRIC SCORE	RUNNING ES	CORE ENRICHMENT
row_0	186939	Ras-related protein rac-2	null	null	626	1.17647	-0.0173168	Yes
row_1	179680	Tubulin beta chain	null	null	2344	0.457713	-0.0933844	Yes
row_2	179223	Probable V-type proton ATPase subunit H 1	null	null	2946	0.336876	-0.109355	Yes
row_3	172717	Tubulin alpha chain	null	null	3483	0.262238	-0.121825	Yes
row_4	172137	hypothetical protein	null	null	3670	0.240921	-0.115448	Yes
row_5	185538	Tubulin alpha chain	null	null	5027	0.137023	-0.172076	Yes
row_6	184569	Tubulin alpha chain	null	null	5206	0.128085	-0.165267	Yes
row_7	179832	EEA1 (Early Endosome Antigen, Rab effector) homolog	null	null	5545	0.111229	-0.167075	Yes
row_8	3564970	V-type proton ATPase catalytic subunit A	null	null	6093	0.0883668	-0.180138	Yes
row_9	172593	Cytoplasmic dynein 2 heavy chain 1	null	null	6252	0.082563	-0.172253	Yes
row_10	178219	V-type proton ATPase subunit a	null	null	6475	0.0741319	-0.167814	Yes
row_11	180692	Probable V-type proton ATPase subunit B	null	null	6603	0.070446	-0.15826	Yes
row_12	179055	SYntaXin	null	null	6951	0.0600272	-0.160552	Yes
row_13	177017	V-type proton ATPase subunit C	null	null	7213	0.0507802	-0.158214	Yes
row_14	176338	V-type proton ATPase subunit D	null	null	7313	0.0472352	-0.147152	Yes
row_15	180111	CathePsin L family	null	null	7384	0.0447569	-0.134528	Yes
row_16	174272	Vacuolar H ATPase	null	null	7587	0.0377234	-0.129012	Yes
row_17	174596	Probable V-type proton ATPase subunit F	null	null	7901	0.0291814	-0.129474	Yes
row_18	177626	V-type proton ATPase subunit a	null	null	8016	0.0251794	-0.119219	Yes
row_19	177440	DYnein Chain, light Intermediate	null	null	8317	0.0164123	-0.118981	Yes
row_20	174680	Tubulin alpha chain	null	null	8323	0.0161996	-0.102857	Yes
row_21	174743	V-type proton ATPase subunit a	null	null	8446	0.0123956	-0.093033	Yes
row_22	172041	Dynein Heavy Chain	null	null	8574	0.0083952	-0.0834786	Yes
row_23	177617	Hepatocyte Growth factor-Regulated TK Substrate (HRS) family	null	null	8646	0.00645447	-0.0709085	Yes
row_24	177442	Vacuolar H ATPase	null	null	8779	0.00276039	-0.0616233	Yes
row_25	176383	V-type proton ATPase 16 kDa proteolipid subunit 1	null	null	8897	-6.79e-05	-0.0515304	Yes
row_26	172216	Probable V-type proton ATPase subunit G	null	null	8959	-0.00195479	-0.0384218	Yes
row_27	180534	Probable V-type proton ATPase subunit H 2	null	null	9059	-0.00458451	-0.0273595	Yes
row_28	172755	RAB family	null	null	9157	-0.00731121	-0.0161896	Yes
row_29	179534	Actin-2	null	null	9238	-0.00983724	-0.00410414	Yes
row_30	172134	V-type proton ATPase subunit	null	null	9449	-0.0153126	0.000980743	Yes
row_31	177103	Vacuolar H ATPase	null	null	9743	-0.0231547	0.00159605	Yes
row_32	177018	Description	null	null	9800	-0.0242814	0.0149739	Yes
row_33	177757	V-type proton ATPase subunit e	null	null	9939	-0.0272374	0.023936	Yes
row_34	176501	Tubulin beta chain	null	null	10017	-0.0291197	0.0361829	Yes
row_35	173167	Tubulin alpha-2 chain	null	null	10120	-0.0313264	0.0470837	Yes
row_36	174834	RAB family	null	null	10180	-0.0328786	0.0602999	Yes
row_37	178260	Dynein Light Intermediate chain	null	null	10242	-0.0343969	0.0734085	Yes
row_38	179533	Description	null	null	10270	-0.035177	0.088348	Yes
row_39	176257	Probable V-type proton ATPase 116 kDa subunit a	null	null	11011	-0.0564568	0.0648922	Yes
row_40	179510	Protein transport protein Sec61 subunit gamma	null	null	11539	-0.073424	0.0529065	Yes
row_41	176390	CalNeXin	null	null	11618	-0.075932	0.0650997	Yes
row_42	177027	Protein transport protein Sec61 subunit beta	null	null	11694	-0.0782489	0.0774543	Yes
row_43	177111	Ras-related protein ced-10	null	null	11869	-0.0840706	0.0844778	Yes
row_44	181170	Tubulin beta-4 chain	null	null	11906	-0.0852847	0.0989326	Yes
row_45	175461	Tubulin beta chain	null	null	12368	-0.100219	0.0905011	Yes
row_46	176568	Tubulin alpha chain	null	null	12448	-0.102869	0.10264	Yes
row_47	178407	yeast SEC homolog	null	null	12574	-0.108006	0.112303	Yes
row_48	172831	Tubulin alpha chain	null	null	12883	-0.119477	0.11211	Yes
row_49	175504	Integrin beta pat-3	null	null	13448	-0.141913	0.098132	Yes
row_50	176793	ACTin	null	null	13529	-0.146239	0.110217	Yes
row_51	180456	yeast SEC homolog	null	null	13530	-0.146267	0.126611	Yes
row_52	175519	Tubulin beta-2 chain	null	null	13595	-0.148954	0.139558	Yes
row_53	181036	Tubulin beta-1 chain	null	null	13618	-0.150141	0.154767	Yes
row_54	181344	hypothetical protein	null	null	13973	-0.167941	0.152097	Yes
row_55	175419	Detyrosinated tubulin alpha-3 chain	null	null	14051	-0.172194	0.164344	Yes
row_56	172280	Phosphatidylinositol 3-kinase catalytic subunit type 3	null	null	14095	-0.17457	0.178422	Yes
row_57	180767	Actin-4	null	null	14156	-0.178024	0.191584	Yes
row_58	180912	LAMP family protein lmp-1	null	null	14773	-0.213986	0.174806	No
row_59	178997	Calreticulin	null	null	16760	-0.39977	0.0842527	No
row_60	191455	Tubulin alpha-8 chain	null	null	17847	-0.767055	0.0421647	No
NAME	PHOSPHATIDYLINOSITOL SIGNALING SYSTEM.xls	Description	GENE SYMBOL	GENE_TITLE	RANK IN GENE LIST	RANK METRIC SCORE	RUNNING ES	CORE ENRICHMENT
row_0	179839	hypothetical protein	null	null	2460	0.434028	-0.111095	No
row_1	186262	Probable diacylglycerol kinase 3	null	null	3534	0.257155	-0.147557	No
row_2	191426	Kinase	null	null	5081	0.134535	-0.20947	No
row_3	172778	SAC1 PIP phosphatase (yeast Suppressor of ACtin) homolog	null	null	5993	0.0926319	-0.237214	No
row_4	172779	Kinase	null	null	6257	0.0824181	-0.230089	No
row_5	190605	hypothetical protein	null	null	6786	0.0650072	-0.237224	Yes
row_6	173241	Golgi-resident PAp (PAP) 3-Phosphatase homolog	null	null	7000	0.058616	-0.227409	Yes
row_7	177525	Phosphoinositide phospholipase C	null	null	7008	0.0583856	-0.206509	Yes
row_8	172141	phosphoinositide kinase AdAPter subunit	null	null	7092	0.0553066	-0.189699	Yes
row_9	174762	Phosphatidylinositol 3-kinase age-1	null	null	7818	0.0314548	-0.207434	Yes
row_10	3565046	Phosphatidate cytidylyltransferase	null	null	7862	0.0302952	-0.188471	Yes
row_11	176757	MTM (myotubularin) family	null	null	8197	0.0195885	-0.185167	Yes
row_12	172148	Myotubularin-related protein 1	null	null	8203	0.0195002	-0.16416	Yes
row_13	172822	OCRL (Lowe's oculocerebrorenal syndrome protein) homolog	null	null	8257	0.0181549	-0.145735	Yes
row_14	172221	Inositol hexakisphosphate and diphosphoinositol-pentakisphosphate kinase	null	null	8400	0.0138048	-0.132099	Yes
row_15	173236	hypothetical protein	null	null	8810	0.00216792	-0.132831	Yes
row_16	180871	Probable type I inositol 1,4,5-trisphosphate 5-phosphatase	null	null	8815	0.00198757	-0.11177	Yes
row_17	174586	1-phosphatidylinositol 4,5-bisphosphate phosphodiesterase gamma plc-3	null	null	8908	-0.000396221	-0.0954436	Yes
row_18	174902	CDP-diacylglycerol--inositol 3-phosphatidyltransferase	null	null	8979	-0.00261302	-0.0779337	Yes
row_19	176869	Phosphatidylinositol 3,4,5-trisphosphate 3-phosphatase and dual-specificity protein phosphatase daf-18	null	null	9639	-0.0206231	-0.0921177	Yes
row_20	176653	hypothetical protein	null	null	9734	-0.0229429	-0.0758992	Yes
row_21	181428	PIP Kinase	null	null	10043	-0.0296627	-0.071196	Yes
row_22	177667	Diacylglycerol kinase	null	null	10258	-0.0349701	-0.0614347	Yes
row_23	178284	Synaptojanin	null	null	10267	-0.0351294	-0.0405886	Yes
row_24	172477	Inositol monophosphatase ttx-7	null	null	10329	-0.0365551	-0.0225944	Yes
row_25	180720	DiacylGlycerol Kinase	null	null	10430	-0.0391541	-0.00669877	Yes
row_26	178614	CalMoDulin	null	null	10698	-0.0466006	0.000210627	Yes
row_27	172184	PIP Kinase	null	null	10801	-0.0502817	0.0159986	Yes
row_28	177970	INositol Polyphosphate-5-Phosphatase	null	null	11099	-0.0594097	0.0212937	Yes
row_29	177546	Inositol 1,4,5-trisphosphate receptor itr-1	null	null	11107	-0.0596912	0.0421937	Yes
row_30	175344	PIP Kinase	null	null	12519	-0.105777	-0.0124553	Yes
row_31	181274	1-phosphatidylinositol 4,5-bisphosphate phosphodiesterase epsilon-1	null	null	12641	-0.110226	0.00231035	Yes
row_32	179715	CALmodulin related genes	null	null	12657	-0.110712	0.0227798	Yes
row_33	182789	CALmodulin related genes	null	null	13005	-0.123933	0.0253844	Yes
row_34	180443	PhosphoInositide Four Kinase (PI-4 Kinase)	null	null	13037	-0.125089	0.0449929	Yes
row_35	180452	Diacylglycerol kinase	null	null	13151	-0.12961	0.060189	Yes
row_36	178537	1-phosphatidylinositol 4,5-bisphosphate phosphodiesterase beta egl-8	null	null	13385	-0.139481	0.0689279	Yes
row_37	175490	Myotubularin-related protein 3	null	null	13393	-0.139776	0.0898279	Yes
row_38	181166	Protein kinase C	null	null	13783	-0.158466	0.0901725	Yes
row_39	177945	CALmodulin related genes	null	null	13787	-0.158654	0.111288	Yes
row_40	172280	Phosphatidylinositol 3-kinase catalytic subunit type 3	null	null	14095	-0.17457	0.116045	Yes
row_41	180770	hypothetical protein	null	null	14231	-0.182354	0.130057	Yes
row_42	174068	Putative diacylglycerol kinase K06A1.6	null	null	14546	-0.199821	0.134437	Yes
row_43	172128	Inositol-trisphosphate 3-kinase homolog	null	null	14574	-0.201762	0.154261	Yes
row_44	186916	hypothetical protein	null	null	15166	-0.241234	0.143736	Yes
row_45	181618	Phosphatidylinositol 3-kinase piki-1	null	null	15473	-0.262813	0.148547	Yes
row_46	177143	CALmodulin related genes	null	null	16086	-0.316631	0.136892	Yes
NAME	PROTEIN PROCESSING IN ENDOPLASMIC RETICULUM.xls	Description	GENE SYMBOL	GENE_TITLE	RANK IN GENE LIST	RANK METRIC SCORE	RUNNING ES	CORE ENRICHMENT
row_0	172773	SKp1 Related (ubiquitin ligase complex component)	null	null	3273	0.289124	-0.169485	No
row_1	174257	SKp1 Related (ubiquitin ligase complex component)	null	null	3704	0.237397	-0.185269	No
row_2	179272	hypothetical protein	null	null	4831	0.146498	-0.238681	No
row_3	191169	Mitogen-activated protein kinase	null	null	5028	0.137012	-0.241815	No
row_4	260116	SKp1 Related (ubiquitin ligase complex component)	null	null	5034	0.136617	-0.234623	No
row_5	177726	alpha-1,2-Mannosidase	null	null	5258	0.125843	-0.239216	No
row_6	3565222	Ubiquitin Fusion Degradation (yeast UFD homolog)	null	null	5588	0.109141	-0.24954	No
row_7	176195	Heat shock protein 110	null	null	5695	0.104202	-0.247808	No
row_8	177857	alpha-1,2-Mannosidase	null	null	5937	0.0946213	-0.253374	No
row_9	3565860	Ubiquitin Fusion Degradation (yeast UFD homolog)	null	null	6567	0.0715929	-0.279917	Yes
row_10	173028	Peptide-N(4)-(N-acetyl-beta-glucosaminyl)asparagine amidase	null	null	6610	0.0702284	-0.274725	Yes
row_11	172799	Intracellular LEctin	null	null	6792	0.0645752	-0.277048	Yes
row_12	174295	Probable ubiquitin conjugation factor E4	null	null	6800	0.0643021	-0.269964	Yes
row_13	177253	UBX-containing protein in Nematodes	null	null	6805	0.0641937	-0.262717	Yes
row_14	176664	hypothetical protein	null	null	6833	0.0632501	-0.256714	Yes
row_15	180049	Ataxin-3 homolog	null	null	6836	0.0630945	-0.24936	Yes
row_16	176866	GLH-binding kinase 1	null	null	6898	0.0615354	-0.245195	Yes
row_17	174217	UBiquitin Conjugating enzyme	null	null	7048	0.0568491	-0.245787	Yes
row_18	174203	Heat Shock Protein	null	null	7096	0.0551202	-0.240866	Yes
row_19	177998	Mannosyl-oligosaccharide glucosidase	null	null	7147	0.0531014	-0.236106	Yes
row_20	174309	Transitional endoplasmic reticulum ATPase homolog 2	null	null	7386	0.0446611	-0.24151	Yes
row_21	178040	DnaJ homolog subfamily B member 1	null	null	7395	0.0443418	-0.23448	Yes
row_22	172586	Cell Division Cycle related	null	null	7515	0.0402933	-0.233451	Yes
row_23	174624	Transitional endoplasmic reticulum ATPase homolog 1	null	null	7574	0.0385098	-0.229124	Yes
row_24	172986	MARCH (Membrane-Associated Ring finger (C3HC4)) homolog	null	null	7618	0.0369167	-0.223986	Yes
row_25	171870	DNaJ domain (prokaryotic heat shock protein)	null	null	7710	0.034732	-0.221443	Yes
row_26	172915	Derlin-1	null	null	7900	0.0291998	-0.224198	Yes
row_27	178507	Heat shock 70 kDa protein A	null	null	7928	0.0281047	-0.218195	Yes
row_28	172373	BAG family molecular chaperone regulator 1	null	null	7990	0.0260659	-0.21403	Yes
row_29	173228	UBiquitin Conjugating enzyme	null	null	8182	0.0201646	-0.216894	Yes
row_30	176241	hypothetical protein	null	null	8184	0.0201348	-0.209485	Yes
row_31	171769	Eukaryotic Initiation Factor	null	null	8369	0.0147482	-0.21197	Yes
row_32	172510	alpha-1,2-Mannosidase	null	null	8411	0.0134284	-0.206724	Yes
row_33	172833	E3 ubiquitin-protein ligase hrd-like protein 1	null	null	8447	0.0123872	-0.201153	Yes
row_34	176816	E3 ubiquitin-protein ligase parkin	null	null	8481	0.0115591	-0.195475	Yes
row_35	180317	yeast SEC homolog	null	null	8524	0.00940305	-0.190283	Yes
row_36	177217	GTP-binding protein SAR1	null	null	8686	0.00519824	-0.191524	Yes
row_37	173952	NPL (yeast Nuclear Protein Localization) homolog	null	null	8736	0.00368369	-0.18671	Yes
row_38	173325	Endoplasmic Reticulum Oxidase	null	null	8782	0.00273639	-0.181681	Yes
row_39	3565577	NPL (yeast Nuclear Protein Localization) homolog	null	null	8860	0.000997884	-0.178381	Yes
row_40	259424	UBiquitin Conjugating enzyme	null	null	9063	-0.00471809	-0.181839	Yes
row_41	174514	DnaJ homolog dnj-20	null	null	9110	-0.00590932	-0.176863	Yes
row_42	176018	Derlin-2	null	null	9137	-0.00674666	-0.170806	Yes
row_43	176363	Probable ubiquitin-conjugating enzyme E2 7	null	null	9170	-0.00761477	-0.165073	Yes
row_44	174515	hypothetical protein	null	null	9494	-0.0166894	-0.175073	Yes
row_45	178183	yeast SEC homolog	null	null	9518	-0.0171832	-0.168854	Yes
row_46	177072	Uncharacterized protein	null	null	9540	-0.0177212	-0.162526	Yes
row_47	172641	yeast SEC homolog	null	null	9571	-0.0184837	-0.156685	Yes
row_48	177460	Stress-activated protein kinase jnk-1	null	null	9602	-0.0196081	-0.150845	Yes
row_49	178006	Ubiquitin-conjugating enzyme E2 2	null	null	9678	-0.0214944	-0.147437	Yes
row_50	172434	UBiQuiLin	null	null	9722	-0.0226112	-0.142299	Yes
row_51	3565862	DNaJ domain (prokaryotic heat shock protein)	null	null	9805	-0.0243528	-0.139269	Yes
row_52	174305	IRE1 kinase related	null	null	9808	-0.0244003	-0.131914	Yes
row_53	179653	alpha-1,2-Mannosidase	null	null	9856	-0.0253209	-0.126993	Yes
row_54	174429	hypothetical protein	null	null	9961	-0.0278909	-0.125153	Yes
row_55	174785	hypothetical protein	null	null	10022	-0.0292001	-0.120934	Yes
row_56	177057	UBX-containing protein in Nematodes	null	null	10046	-0.0297032	-0.114714	Yes
row_57	173637	UBiquitin Conjugating enzyme	null	null	10150	-0.032208	-0.11282	Yes
row_58	179358	RING-box protein 1	null	null	10197	-0.0332762	-0.107844	Yes
row_59	177902	Translocating chain-associated membrane protein	null	null	10318	-0.0362075	-0.106869	Yes
row_60	179612	E3 ubiquitin-protein ligase hrd-1	null	null	10337	-0.0366686	-0.10038	Yes
row_61	173298	hypothetical protein	null	null	10389	-0.0380716	-0.0956743	Yes
row_62	176466	Cullin-1	null	null	10415	-0.0386619	-0.0895631	Yes
row_63	175541	X-box Binding Protein homolog	null	null	10465	-0.040082	-0.0847495	Yes
row_64	174953	Eukaryotic translation initiation factor 2-alpha kinase gcn-2	null	null	10476	-0.0402691	-0.0778275	Yes
row_65	172303	C-term of Hsp70-iNteracting protein (CHIP family)	null	null	10545	-0.0420997	-0.0740411	Yes
row_66	172370	Dolichyl-diphosphooligosaccharide--protein glycosyltransferase subunit dad-1	null	null	10627	-0.0444038	-0.0709575	Yes
row_67	172775	Skp1-related protein	null	null	10806	-0.050388	-0.073118	Yes
row_68	176957	Protein SEC13 homolog	null	null	10813	-0.0505586	-0.0659796	Yes
row_69	181210	alpha-1,2-Mannosidase	null	null	11089	-0.059151	-0.0733842	Yes
row_70	175472	Protein disulfide-isomerase 1	null	null	11139	-0.0607361	-0.0685706	Yes
row_71	178078	yeast SEC homolog	null	null	11252	-0.0642145	-0.067163	Yes
row_72	181576	ATF (cAMP-dependent transcription factor) family	null	null	11377	-0.0682229	-0.0664041	Yes
row_73	176089	Probable dolichyl-diphosphooligosaccharide--protein glycosyltransferase subunit 3	null	null	11488	-0.0713873	-0.0648883	Yes
row_74	177456	Dolichyl-diphosphooligosaccharide--protein glycosyltransferase subunit 1	null	null	11521	-0.0723533	-0.0591556	Yes
row_75	174805	Description	null	null	11533	-0.0731136	-0.0522876	Yes
row_76	179510	Protein transport protein Sec61 subunit gamma	null	null	11539	-0.073424	-0.0450953	Yes
row_77	176390	CalNeXin	null	null	11618	-0.075932	-0.0418495	Yes
row_78	177027	Protein transport protein Sec61 subunit beta	null	null	11694	-0.0782489	-0.0384415	Yes
row_79	179364	Acid Alpha Glucosidase Relate	null	null	11912	-0.0854531	-0.0427104	Yes
row_80	179642	Mannosyl-oligosaccharide 1,2-alpha-mannosidase C52E4.5	null	null	11913	-0.0854596	-0.0352478	Yes
row_81	174268	Dolichyl-diphosphooligosaccharide--protein glycosyltransferase 48 kDa subunit	null	null	11938	-0.0864714	-0.0290826	Yes
row_82	176626	TRanslocon-Associated Protein	null	null	12103	-0.0914367	-0.0304862	Yes
row_83	172208	Dolichyl-diphosphooligosaccharide--protein glycosyltransferase subunit 2	null	null	12352	-0.0995104	-0.0364311	Yes
row_84	171865	TRanslocon-Associated Protein	null	null	12419	-0.101705	-0.0325365	Yes
row_85	177028	TRanslocon-Associated Protein	null	null	12502	-0.105207	-0.029507	Yes
row_86	178407	yeast SEC homolog	null	null	12574	-0.108006	-0.0258828	Yes
row_87	173278	DNaJ domain (prokaryotic heat shock protein)	null	null	12589	-0.108531	-0.019177	Yes
row_88	173341	DNaJ domain (prokaryotic heat shock protein)	null	null	12650	-0.1104	-0.0149581	Yes
row_89	179720	Suppressor/Enhancer of Lin-12	null	null	12668	-0.111116	-0.00841445	Yes
row_90	176616	hypothetical protein	null	null	12773	-0.115427	-0.00657429	Yes
row_91	179971	Heat shock protein 90	null	null	12784	-0.115653	0.000347765	Yes
row_92	181422	hypothetical protein	null	null	12855	-0.118405	0.00402605	Yes
row_93	180746	DNaJ domain (prokaryotic heat shock protein)	null	null	12878	-0.119349	0.0102994	Yes
row_94	175532	RING finger protein 5	null	null	12942	-0.121413	0.0143561	Yes
row_95	174033	hypothetical protein	null	null	13145	-0.129153	0.0108981	Yes
row_96	180787	alpha-1,2-Mannosidase	null	null	13234	-0.13275	0.0136032	Yes
row_97	178214	Cullin-6	null	null	13237	-0.132856	0.0209578	Yes
row_98	175886	Dolichyl-diphosphooligosaccharide--protein glycosyltransferase subunit stt-3	null	null	13262	-0.13377	0.027123	Yes
row_99	177343	Protein skinhead-1	null	null	13296	-0.135275	0.0328016	Yes
row_100	181004	Dual specificity mitogen-activated protein kinase kinase mek-1	null	null	13460	-0.142522	0.031452	Yes
row_101	181334	Eukaryotic translation initiation factor 2-alpha kinase pek-1	null	null	13626	-0.150491	0.0299944	Yes
row_102	180400	Acid Alpha Glucosidase Relate	null	null	13661	-0.152137	0.0356189	Yes
row_103	191765	SKp1 Related (ubiquitin ligase complex component)	null	null	13917	-0.165294	0.0292956	Yes
row_104	181007	UDP-Glucose Glycoprotein glucosylTransferase	null	null	14321	-0.187215	0.0149709	Yes
row_105	180983	DNaJ domain (prokaryotic heat shock protein)	null	null	14354	-0.189179	0.0207036	Yes
row_106	191762	SKp1 Related (ubiquitin ligase complex component)	null	null	14403	-0.192316	0.0255713	Yes
row_107	176147	Probable protein disulfide-isomerase A4	null	null	14453	-0.194775	0.0303849	Yes
row_108	3565569	hypothetical protein	null	null	14638	-0.20544	0.0279	Yes
row_109	180423	Intracellular LEctin	null	null	14663	-0.207253	0.0340652	Yes
row_110	181405	ATF (cAMP-dependent transcription factor) family	null	null	14696	-0.209418	0.0397979	Yes
row_111	178014	Endoplasmin homolog	null	null	14813	-0.216653	0.0409893	Yes
row_112	172433	Protein disulfide-isomerase	null	null	14817	-0.216772	0.0482898	Yes
row_113	181446	SKp1 Related (ubiquitin ligase complex component)	null	null	14892	-0.222507	0.0517518	Yes
row_114	180422	Translocon-associated protein subunit beta	null	null	14959	-0.226639	0.0556464	Yes
row_115	180081	SKp1 Related (ubiquitin ligase complex component)	null	null	14972	-0.22767	0.0624603	Yes
row_116	180974	Probable protein disulfide-isomerase A6	null	null	15078	-0.234529	0.0642464	Yes
row_117	180148	SKp1 Related (ubiquitin ligase complex component)	null	null	15162	-0.241016	0.0672219	Yes
row_118	178493	SKp1 Related (ubiquitin ligase complex component)	null	null	15172	-0.241506	0.074198	Yes
row_119	181447	SKp1 Related (ubiquitin ligase complex component)	null	null	15525	-0.26717	0.0626305	Yes
row_120	181445	SKp1 Related (ubiquitin ligase complex component)	null	null	15535	-0.267906	0.0696067	Yes
row_121	24104671	Mitogen-activated protein kinase kinase kinase nsy-1	null	null	15599	-0.273061	0.0736634	Yes
row_122	180880	Heat Shock Protein	null	null	15605	-0.273419	0.0808558	Yes
row_123	180724	Protein Disulfide Isomerase	null	null	15835	-0.293365	0.0759381	Yes
row_124	178839	SKp1 Related (ubiquitin ligase complex component)	null	null	16046	-0.313008	0.0720476	Yes
row_125	173729	SKp1 Related (ubiquitin ligase complex component)	null	null	16075	-0.315654	0.0779965	Yes
row_126	178840	SKp1 Related (ubiquitin ligase complex component)	null	null	16190	-0.326492	0.079296	Yes
row_127	178447	SKp1 Related (ubiquitin ligase complex component)	null	null	16314	-0.342986	0.080109	Yes
row_128	178496	SKp1 Related (ubiquitin ligase complex component)	null	null	16348	-0.346671	0.0857876	Yes
row_129	173065	DNaJ domain (prokaryotic heat shock protein)	null	null	16350	-0.346919	0.0931962	Yes
row_130	178495	SKp1 Related (ubiquitin ligase complex component)	null	null	16594	-0.377378	0.0875216	Yes
row_131	178997	Calreticulin	null	null	16760	-0.39977	0.086064	Yes
row_132	172757	Heat Shock Protein	null	null	16803	-0.405783	0.091256	Yes
row_133	178494	SKp1 Related (ubiquitin ligase complex component)	null	null	16829	-0.409786	0.0973671	Yes
NAME	SPLICEOSOME.xls	Description	GENE SYMBOL	GENE_TITLE	RANK IN GENE LIST	RANK METRIC SCORE	RUNNING ES	CORE ENRICHMENT
row_0	172015	Small Nuclear RibonucleoProtein homolog	null	null	3117	0.310997	-0.159296	No
row_1	174645	NHP2-like protein 1 homolog	null	null	3933	0.214881	-0.194293	No
row_2	183250	yeast PRP (splicing factor) related	null	null	4408	0.173604	-0.210878	No
row_3	174394	Peptidyl-prolyl cis-trans isomerase 11	null	null	4703	0.154083	-0.217744	No
row_4	191627	CYclophyliN	null	null	4908	0.142588	-0.21975	No
row_5	173394	Splicing factor 3B subunit 6-like protein	null	null	5737	0.10241	-0.255449	Yes
row_6	180232	hypothetical protein	null	null	5758	0.101694	-0.24752	Yes
row_7	176668	Probable small nuclear ribonucleoprotein E	null	null	5771	0.101198	-0.239159	Yes
row_8	178483	Small nuclear ribonucleoprotein Sm D3	null	null	6132	0.0866752	-0.249588	Yes
row_9	179639	Probable small nuclear ribonucleoprotein Sm D2	null	null	6137	0.0865712	-0.240795	Yes
row_10	176103	Probable small nuclear ribonucleoprotein F	null	null	6267	0.0820388	-0.238752	Yes
row_11	172330	Heterogeneous nuclear RibonucleoProtein (HnRNP) K homolog	null	null	6349	0.0788717	-0.234117	Yes
row_12	174193	Probable U6 snRNA-associated Sm-like protein LSm4	null	null	6730	0.0665115	-0.245626	Yes
row_13	177738	Ref/ALY RNA export adaptor family	null	null	6850	0.0626195	-0.243042	Yes
row_14	177988	LSM Sm-like protein	null	null	6897	0.0615414	-0.236517	Yes
row_15	175818	DEAD boX helicase homolog	null	null	6954	0.0599079	-0.230532	Yes
row_16	172713	THO Complex (transcription factor/nuclear export) subunit	null	null	7023	0.0577856	-0.225195	Yes
row_17	179499	yeast PRP (splicing factor) related	null	null	7100	0.0550131	-0.220289	Yes
row_18	175851	Elongation Factor TU family	null	null	7216	0.0506454	-0.21749	Yes
row_19	171970	SYF pre-mRNA splicing factor homolog	null	null	7230	0.0501372	-0.209183	Yes
row_20	172214	hypothetical protein	null	null	7444	0.0428301	-0.211675	Yes
row_21	173767	Probable U2 small nuclear ribonucleoprotein A'	null	null	7516	0.0402111	-0.206499	Yes
row_22	177393	LSM Sm-like protein	null	null	7560	0.0388966	-0.199812	Yes
row_23	171834	Probable small nuclear ribonucleoprotein G	null	null	7640	0.0361568	-0.195069	Yes
row_24	175771	DEAD boX helicase homolog	null	null	7647	0.0359761	-0.186384	Yes
row_25	179443	Pre-mRNA-splicing factor SLU7	null	null	7674	0.0354167	-0.178779	Yes
row_26	179857	hypothetical protein	null	null	7746	0.0338384	-0.173603	Yes
row_27	178546	hypothetical protein	null	null	7882	0.0297627	-0.171884	Yes
row_28	188435	BCAS splicing factor homolog	null	null	7911	0.0285912	-0.164387	Yes
row_29	178507	Heat shock 70 kDa protein A	null	null	7928	0.0281047	-0.156242	Yes
row_30	176461	yeast PRP (splicing factor) related	null	null	7958	0.0272621	-0.148798	Yes
row_31	24104882	Pre-mRNA-processing factor 19	null	null	8190	0.0199358	-0.152262	Yes
row_32	173204	Probable small nuclear ribonucleoprotein-associated protein B	null	null	8250	0.018273	-0.146439	Yes
row_33	24105155	Uncharacterized protein	null	null	8514	0.00972745	-0.151631	Yes
row_34	179500	PLeiotropic ReGulator (vertebrate) homolog	null	null	8830	0.00174077	-0.159631	Yes
row_35	174072	Probable small nuclear ribonucleoprotein Sm D1	null	null	9012	-0.003331	-0.160395	Yes
row_36	172999	yeast PRP (splicing factor) related	null	null	9052	-0.00442657	-0.153492	Yes
row_37	173073	Protein mago nashi homolog	null	null	9114	-0.00608532	-0.147776	Yes
row_38	179833	hypothetical protein	null	null	9156	-0.00729348	-0.140981	Yes
row_39	179140	hypothetical protein	null	null	9185	-0.00801183	-0.133484	Yes
row_40	177840	Uncharacterized protein	null	null	9208	-0.00894729	-0.125663	Yes
row_41	172652	Small Nuclear RibonucleoProtein homolog	null	null	9262	-0.0104873	-0.119516	Yes
row_42	172146	yeast PRP (splicing factor) related	null	null	9276	-0.0108666	-0.111209	Yes
row_43	176943	Uncharacterized protein	null	null	9389	-0.0137957	-0.108247	Yes
row_44	173920	Probable pre-mRNA-splicing factor ATP-dependent RNA helicase mog-5	null	null	9435	-0.0150324	-0.101668	Yes
row_45	173606	Ubiquitin Specific Protease	null	null	9452	-0.0154928	-0.0935229	Yes
row_46	174579	hypothetical protein	null	null	9457	-0.0155778	-0.0847299	Yes
row_47	176409	Probable pre-mRNA-splicing factor ATP-dependent RNA helicase mog-1	null	null	9590	-0.019055	-0.0828484	Yes
row_48	173460	THO Complex (transcription factor/nuclear export) subunit	null	null	9687	-0.0217424	-0.0790229	Yes
row_49	180180	yeast PRP (splicing factor) related	null	null	9727	-0.0226791	-0.0721197	Yes
row_50	174364	hypothetical protein	null	null	9757	-0.0233858	-0.0646766	Yes
row_51	178091	Uncharacterized protein	null	null	9759	-0.0233973	-0.0557216	Yes
row_52	176343	WW domain-containing protein ZK1098.1	null	null	9782	-0.0238638	-0.0479005	Yes
row_53	176063	hypothetical protein	null	null	9784	-0.0238974	-0.0389455	Yes
row_54	175900	THO Complex (transcription factor/nuclear export) subunit	null	null	9872	-0.0257806	-0.0346341	Yes
row_55	171922	RNP (RRM RNA binding domain) containing	null	null	9909	-0.026523	-0.0275689	Yes
row_56	190601	LSM Sm-like protein	null	null	10227	-0.0340433	-0.0356766	Yes
row_57	174150	TransCription Elongation Regulator homolog	null	null	10231	-0.034166	-0.0268295	Yes
row_58	177979	RNA Binding Motif protein homolog	null	null	10332	-0.0365883	-0.0232201	Yes
row_59	172030	ACINus (mammalian Apoptotic Chromatin condensation Inducer in the Nucleus) homolog	null	null	10340	-0.0367603	-0.0145891	Yes
row_60	177283	Uncharacterized protein	null	null	10395	-0.0381689	-0.00849581	Yes
row_61	259655	hypothetical protein	null	null	10413	-0.0385652	-0.000404726	Yes
row_62	175117	Masculinisation Of Germline	null	null	10435	-0.0392597	0.00747037	Yes
row_63	172639	Cell Division Cycle related	null	null	10702	-0.046658	0.00211653	Yes
row_64	175549	Splicing Factor ThreeB (3b) Subunit homolog	null	null	10743	-0.0481759	0.00896571	Yes
row_65	174333	Spliceosome RNA helicase DDX39B homolog	null	null	10751	-0.0484948	0.0175968	Yes
row_66	184953	Nuclear cap-binding protein subunit 2	null	null	10769	-0.0492157	0.0256878	Yes
row_67	175281	SMN (Survival of Motor Neuron protein) Related	null	null	10812	-0.05053	0.032429	Yes
row_68	173440	yeast PRP (splicing factor) related	null	null	10919	-0.053609	0.0357145	Yes
row_69	180047	LSM Sm-like protein	null	null	10940	-0.0540623	0.0436436	Yes
row_70	174901	Putative U5 small nuclear ribonucleoprotein 200 kDa helicase	null	null	11080	-0.0588623	0.0451472	Yes
row_71	172258	hypothetical protein	null	null	11206	-0.0626843	0.0474067	Yes
row_72	176003	Pre-mRNA-splicing factor syf-2	null	null	11219	-0.0631325	0.0557678	Yes
row_73	179598	mammalian SKIP (Ski interacting protein) homolog	null	null	11240	-0.06381	0.0636969	Yes
row_74	175469	hypothetical protein	null	null	11510	-0.072099	0.0581811	Yes
row_75	174805	Description	null	null	11533	-0.0731136	0.0660022	Yes
row_76	3564851	PHd Finger family	null	null	11547	-0.0736277	0.0743092	Yes
row_77	176002	RNP (RRM RNA binding domain) containing	null	null	11551	-0.0737154	0.0831563	Yes
row_78	172345	Nuclear cap-binding protein subunit 1	null	null	11630	-0.0762253	0.0879536	Yes
row_79	176368	Protein BUD31 homolog	null	null	11679	-0.0778583	0.0943708	Yes
row_80	175270	Splicing factor U2AF 65 kDa subunit	null	null	11695	-0.0783419	0.10257	Yes
row_81	177674	U1 small nuclear ribonucleoprotein C	null	null	11733	-0.0797707	0.109581	Yes
row_82	178147	REversed POlarity in early embryos	null	null	11743	-0.0800321	0.118104	Yes
row_83	180069	Protein CWC15 homolog	null	null	11781	-0.0810877	0.125115	Yes
row_84	176090	Putative zinc finger matrin-type protein snu-23	null	null	11787	-0.081267	0.133854	Yes
row_85	176613	SR Protein (splicing factor)	null	null	11788	-0.0813347	0.142863	Yes
row_86	178487	Peptidyl-prolyl cis-trans isomerase	null	null	11797	-0.0815558	0.15144	Yes
row_87	175572	RNA-binding protein 8A	null	null	11834	-0.0830852	0.158506	Yes
row_88	178542	Splicing Factor ThreeB (3b) Subunit homolog	null	null	11847	-0.0833744	0.166867	Yes
row_89	176153	Pre-mRNA-splicing factor 8 homolog	null	null	11943	-0.0866459	0.170746	Yes
row_90	178979	hypothetical protein	null	null	11946	-0.0867311	0.179647	Yes
row_91	178157	Ref/ALY RNA export adaptor family	null	null	12035	-0.0894346	0.183904	Yes
row_92	174748	Probable splicing factor, arginine/serine-rich 1	null	null	12090	-0.091104	0.189998	Yes
row_93	173915	Probable splicing factor, arginine/serine-rich 4	null	null	12210	-0.09463	0.192581	Yes
row_94	178303	LSM Sm-like protein	null	null	12326	-0.0986903	0.195381	Yes
row_95	177037	Uncharacterized protein	null	null	12371	-0.10028	0.202014	Yes
row_96	4363023	Splicing factor 3B subunit 4	null	null	12521	-0.105821	0.202978	Yes
row_97	172406	Tumorous Enhancer of Glp-1(gf)	null	null	12591	-0.108542	0.208261	Yes
row_98	176847	PQBP1 (polyglutamine tract-binding neurodegeneration protein) homolog	null	null	12965	-0.12226	0.197129	Yes
row_99	179524	ISY splicing factor homolog	null	null	12997	-0.123639	0.204465	Yes
row_100	176688	Probable splicing factor, arginine/serine-rich 3	null	null	13246	-0.13328	0.200083	Yes
row_101	181319	Small Nuclear RibonucleoProtein homolog	null	null	13638	-0.151226	0.187979	Yes
row_102	178489	U2AF splicing factor	null	null	13736	-0.156182	0.191751	Yes
row_103	190485	hypothetical protein	null	null	13742	-0.156406	0.20049	Yes
row_104	174747	Probable splicing factor, arginine/serine-rich 2	null	null	13755	-0.157045	0.208851	Yes
row_105	177566	Probable splicing factor, arginine/serine-rich 6	null	null	13955	-0.167355	0.207115	Yes
row_106	177101	Heterogeneous nuclear ribonucleoprotein A1	null	null	14079	-0.173667	0.209482	Yes
row_107	177735	Ref/ALY RNA export adaptor family	null	null	14233	-0.1824	0.21023	Yes
row_108	3565569	hypothetical protein	null	null	14638	-0.20544	0.197425	Yes
row_109	179897	DEAD boX helicase homolog	null	null	15973	-0.305465	0.134404	Yes
row_110	172757	Heat Shock Protein	null	null	16803	-0.405783	0.0986501	Yes
NAME	TGF-BETA SIGNALING PATHWAY.xls	Description	GENE SYMBOL	GENE_TITLE	RANK IN GENE LIST	RANK METRIC SCORE	RUNNING ES	CORE ENRICHMENT
row_0	172773	SKp1 Related (ubiquitin ligase complex component)	null	null	3273	0.289124	-0.150402	No
row_1	174257	SKp1 Related (ubiquitin ligase complex component)	null	null	3704	0.237397	-0.14789	No
row_2	260116	SKp1 Related (ubiquitin ligase complex component)	null	null	5034	0.136617	-0.193731	No
row_3	175545	Mitogen-activated protein kinase mpk-1	null	null	6117	0.0871766	-0.226287	No
row_4	172088	Rho-associated protein kinase let-502	null	null	8444	0.0124321	-0.325754	No
row_5	176554	Ribosomal protein S6 kinase beta	null	null	8848	0.00122049	-0.321789	No
row_6	178117	Serine/threonine-protein phosphatase 2A catalytic subunit	null	null	9718	-0.0225427	-0.342888	No
row_7	179358	RING-box protein 1	null	null	10197	-0.0332762	-0.342957	Yes
row_8	176466	Cullin-1	null	null	10415	-0.0386619	-0.328988	Yes
row_9	172775	Skp1-related protein	null	null	10806	-0.050388	-0.324323	Yes
row_10	175750	Probable serine/threonine-protein phosphatase PP2A regulatory subunit	null	null	10900	-0.0531897	-0.303685	Yes
row_11	180133	E2F-like (mammalian transcription factor)	null	null	11503	-0.0718123	-0.310423	Yes
row_12	175955	Dwarfin sma-3	null	null	11736	-0.0798273	-0.29726	Yes
row_13	172249	Retinoblastoma-like protein homolog lin-35	null	null	12113	-0.0917606	-0.291843	Yes
row_14	179068	DPP/BMP-Like	null	null	12806	-0.116547	-0.303422	Yes
row_15	178458	Ras-like GTP-binding protein rhoA	null	null	12831	-0.117499	-0.279072	Yes
row_16	178214	Cullin-6	null	null	13237	-0.132856	-0.275215	Yes
row_17	180431	Dwarfin sma	null	null	13471	-0.143068	-0.262106	Yes
row_18	191765	SKp1 Related (ubiquitin ligase complex component)	null	null	13917	-0.165294	-0.2604	Yes
row_19	191762	SKp1 Related (ubiquitin ligase complex component)	null	null	14403	-0.192316	-0.260846	Yes
row_20	176380	Protein cbp-1	null	null	14527	-0.198748	-0.24182	Yes
row_21	175815	Dwarfin sma-4	null	null	14557	-0.200397	-0.217739	Yes
row_22	181446	SKp1 Related (ubiquitin ligase complex component)	null	null	14892	-0.222507	-0.210063	Yes
row_23	175781	Cell surface receptor daf-4	null	null	14912	-0.223784	-0.185444	Yes
row_24	180081	SKp1 Related (ubiquitin ligase complex component)	null	null	14972	-0.22767	-0.162976	Yes
row_25	180148	SKp1 Related (ubiquitin ligase complex component)	null	null	15162	-0.241016	-0.147501	Yes
row_26	178493	SKp1 Related (ubiquitin ligase complex component)	null	null	15172	-0.241506	-0.122344	Yes
row_27	181447	SKp1 Related (ubiquitin ligase complex component)	null	null	15525	-0.26717	-0.115636	Yes
row_28	181445	SKp1 Related (ubiquitin ligase complex component)	null	null	15535	-0.267906	-0.0904787	Yes
row_29	174044	Serine/threonine-protein kinase sma-6	null	null	15578	-0.27096	-0.0670967	Yes
row_30	178839	SKp1 Related (ubiquitin ligase complex component)	null	null	16046	-0.313008	-0.066574	Yes
row_31	173729	SKp1 Related (ubiquitin ligase complex component)	null	null	16075	-0.315654	-0.042439	Yes
row_32	178840	SKp1 Related (ubiquitin ligase complex component)	null	null	16190	-0.326492	-0.0229296	Yes
row_33	178447	SKp1 Related (ubiquitin ligase complex component)	null	null	16314	-0.342986	-0.00390434	Yes
row_34	178496	SKp1 Related (ubiquitin ligase complex component)	null	null	16348	-0.346671	0.0199617	Yes
row_35	176229	Dwarfin sma-2	null	null	16372	-0.348922	0.0443657	Yes
row_36	178495	SKp1 Related (ubiquitin ligase complex component)	null	null	16594	-0.377378	0.0581199	Yes
row_37	178494	SKp1 Related (ubiquitin ligase complex component)	null	null	16829	-0.409786	0.0711748	Yes
row_38	3565956	hypothetical protein	null	null	17367	-0.523363	0.0679325	Yes
NAME	UBIQUITIN MEDIATED PROTEOLYSIS.xls	Description	GENE SYMBOL	GENE_TITLE	RANK IN GENE LIST	RANK METRIC SCORE	RUNNING ES	CORE ENRICHMENT
row_0	186057	UBiquitin Conjugating enzyme	null	null	581	1.20714	-0.0197013	No
row_1	172773	SKp1 Related (ubiquitin ligase complex component)	null	null	3273	0.289124	-0.15318	No
row_2	174257	SKp1 Related (ubiquitin ligase complex component)	null	null	3704	0.237397	-0.164739	No
row_3	176583	Suppressor of spindle checkpoint defect 1	null	null	3868	0.22055	-0.1619	No
row_4	175749	SKP2 (S phase Kinase associated Protein Two) homolog	null	null	4296	0.182739	-0.173298	No
row_5	179454	Anaphase-promoting complex subunit 10	null	null	4483	0.16735	-0.171699	No
row_6	260116	SKp1 Related (ubiquitin ligase complex component)	null	null	5034	0.136617	-0.189729	No
row_7	174198	Cullin-4	null	null	6289	0.0811556	-0.24572	No
row_8	24104970	SUMO-activating enzyme subunit uba-2	null	null	6548	0.072126	-0.248005	Yes
row_9	179409	SUMO-activating enzyme subunit aos-1	null	null	6559	0.0718323	-0.236916	Yes
row_10	174674	Peptidyl-prolyl cis-trans isomerase 4	null	null	6750	0.06606	-0.235533	Yes
row_11	174295	Probable ubiquitin conjugation factor E4	null	null	6800	0.0643021	-0.226548	Yes
row_12	178156	DNA damage-binding protein 1	null	null	6814	0.0639186	-0.215621	Yes
row_13	174217	UBiquitin Conjugating enzyme	null	null	7048	0.0568491	-0.216557	Yes
row_14	175982	NEDD8-activating enzyme E1 catalytic subunit	null	null	7084	0.0553845	-0.206816	Yes
row_15	177855	UBA (human ubiquitin) related	null	null	7382	0.0447835	-0.211203	Yes
row_16	24104987	ELongin C	null	null	7391	0.0444853	-0.200007	Yes
row_17	179413	Cullin-5	null	null	7598	0.0373845	-0.199487	Yes
row_18	173072	NEDD8-conjugating enzyme ubc-12	null	null	7881	0.0297815	-0.203065	Yes
row_19	177073	Ubiquitin-conjugating enzyme E2 13	null	null	8049	0.0242342	-0.200443	Yes
row_20	172737	Protein maternal effect lethal 26	null	null	8136	0.021801	-0.193452	Yes
row_21	173228	UBiquitin Conjugating enzyme	null	null	8182	0.0201646	-0.184251	Yes
row_22	24104882	Pre-mRNA-processing factor 19	null	null	8190	0.0199358	-0.173	Yes
row_23	176515	OXidative stress Induced	null	null	8191	0.0198574	-0.161372	Yes
row_24	174058	F-box/WD repeat-containing protein lin-23	null	null	8283	0.0175444	-0.154651	Yes
row_25	172145	Cell division cycle protein 27 homolog	null	null	8340	0.0157496	-0.146043	Yes
row_26	176816	E3 ubiquitin-protein ligase parkin	null	null	8481	0.0115591	-0.141965	Yes
row_27	186377	Ubiquitin E2 (conjugating enzyme) variant	null	null	8648	0.006421	-0.139288	Yes
row_28	176806	Cullin-2	null	null	8765	0.00296931	-0.133915	Yes
row_29	175985	UBiquitin Conjugating enzyme	null	null	8795	0.00249982	-0.123851	Yes
row_30	174388	E3 ubiquitin-protein ligase etc-1	null	null	8882	0.000421875	-0.11686	Yes
row_31	176139	Anaphase-promoting complex subunit 2	null	null	8935	-0.00120401	-0.108036	Yes
row_32	178547	CULlin	null	null	8974	-0.00248049	-0.0984576	Yes
row_33	259424	UBiquitin Conjugating enzyme	null	null	9063	-0.00471809	-0.0915749	Yes
row_34	172344	yeast RBX (ring finger protein) homolog	null	null	9127	-0.00643987	-0.0833441	Yes
row_35	172733	E3 SUMO-protein ligase gei-17	null	null	9165	-0.00745522	-0.0737113	Yes
row_36	176363	Probable ubiquitin-conjugating enzyme E2 7	null	null	9170	-0.00761477	-0.0622991	Yes
row_37	179878	F-box/WD repeat-containing protein sel-10	null	null	9172	-0.00763175	-0.0507251	Yes
row_38	181979	Probable ubiquitin-conjugating enzyme protein 17	null	null	9201	-0.00881964	-0.0406071	Yes
row_39	3565767	SUMO-conjugating enzyme UBC9	null	null	9393	-0.0138769	-0.0392784	Yes
row_40	175205	Cell division cycle protein 23 homolog	null	null	9490	-0.016601	-0.0328271	Yes
row_41	172941	Ubiquitin-conjugating enzyme E2 25	null	null	9630	-0.020348	-0.0286945	Yes
row_42	178006	Ubiquitin-conjugating enzyme E2 2	null	null	9678	-0.0214944	-0.019601	Yes
row_43	174698	Anaphase-promoting complex subunit 1	null	null	9738	-0.0231086	-0.0111545	Yes
row_44	3565580	hypothetical protein	null	null	9836	-0.0248152	-0.00475712	Yes
row_45	173354	UBiquitin Conjugating enzyme	null	null	10138	-0.0318186	-0.00936	Yes
row_46	182321	Probable ubiquitin-conjugating enzyme E2 21	null	null	10140	-0.0318721	0.00221398	Yes
row_47	173637	UBiquitin Conjugating enzyme	null	null	10150	-0.032208	0.0133566	Yes
row_48	179358	RING-box protein 1	null	null	10197	-0.0332762	0.022504	Yes
row_49	179612	E3 ubiquitin-protein ligase hrd-1	null	null	10337	-0.0366686	0.0266367	Yes
row_50	176466	Cullin-1	null	null	10415	-0.0386619	0.0341125	Yes
row_51	172303	C-term of Hsp70-iNteracting protein (CHIP family)	null	null	10545	-0.0420997	0.0387844	Yes
row_52	172775	Skp1-related protein	null	null	10806	-0.050388	0.0363923	Yes
row_53	174314	Cell division cycle protein 16 homolog	null	null	10834	-0.0512082	0.0465643	Yes
row_54	176605	ELongin B	null	null	10871	-0.0523174	0.056251	Yes
row_55	175604	Anaphase-promoting complex subunit 11	null	null	10944	-0.0541344	0.0639964	Yes
row_56	177084	Enhancer of EfL-1 mutant phenotype	null	null	11215	-0.062979	0.0610652	Yes
row_57	171719	E3 ubiquitin-protein ligase	null	null	11889	-0.0848705	0.036403	Yes
row_58	182322	UBiquitin Conjugating enzyme	null	null	11936	-0.0864269	0.0455504	Yes
row_59	172697	UBR E3 ubiquitin ligase homolog	null	null	12023	-0.089092	0.052541	Yes
row_60	175185	UBiquitin Conjugating enzyme	null	null	12106	-0.0915867	0.0597472	Yes
row_61	190802	UBiquitin Conjugating enzyme	null	null	12338	-0.0991114	0.0589189	Yes
row_62	190775	ELongin C	null	null	12626	-0.109769	0.055071	Yes
row_63	171647	E3 ubiquitin-protein ligase	null	null	12779	-0.11554	0.0585026	Yes
row_64	174516	FiZzy Related family	null	null	13093	-0.126998	0.0532526	Yes
row_65	181321	Von Hippel-Lindau tumor suppressor homolog	null	null	13156	-0.129749	0.0615373	Yes
row_66	178214	Cullin-6	null	null	13237	-0.132856	0.0688514	Yes
row_67	177170	Ubiquitin-conjugating enzyme E2 1	null	null	13525	-0.146019	0.0650034	Yes
row_68	171734	UBiquitin Conjugating enzyme	null	null	13740	-0.156358	0.0650918	Yes
row_69	191765	SKp1 Related (ubiquitin ligase complex component)	null	null	13917	-0.165294	0.0672293	Yes
row_70	191762	SKp1 Related (ubiquitin ligase complex component)	null	null	14403	-0.192316	0.0527046	Yes
row_71	180419	Suppressor of LIneage defect	null	null	14531	-0.198994	0.0574843	Yes
row_72	177138	E3 ubiquitin-protein ligase siah-1	null	null	14718	-0.210307	0.0590826	Yes
row_73	181446	SKp1 Related (ubiquitin ligase complex component)	null	null	14892	-0.222507	0.0613818	Yes
row_74	180081	SKp1 Related (ubiquitin ligase complex component)	null	null	14972	-0.22767	0.0687498	Yes
row_75	180148	SKp1 Related (ubiquitin ligase complex component)	null	null	15162	-0.241016	0.0701863	Yes
row_76	178493	SKp1 Related (ubiquitin ligase complex component)	null	null	15172	-0.241506	0.0813289	Yes
row_77	181447	SKp1 Related (ubiquitin ligase complex component)	null	null	15525	-0.26717	0.0739759	Yes
row_78	181445	SKp1 Related (ubiquitin ligase complex component)	null	null	15535	-0.267906	0.0851186	Yes
row_79	178839	SKp1 Related (ubiquitin ligase complex component)	null	null	16046	-0.313008	0.0692458	Yes
row_80	173729	SKp1 Related (ubiquitin ligase complex component)	null	null	16075	-0.315654	0.0793638	Yes
row_81	178840	SKp1 Related (ubiquitin ligase complex component)	null	null	16190	-0.326492	0.0848445	Yes
row_82	178447	SKp1 Related (ubiquitin ligase complex component)	null	null	16314	-0.342986	0.0898399	Yes
row_83	178496	SKp1 Related (ubiquitin ligase complex component)	null	null	16348	-0.346671	0.0996884	Yes
row_84	178495	SKp1 Related (ubiquitin ligase complex component)	null	null	16594	-0.377378	0.0981052	Yes
row_85	178494	SKp1 Related (ubiquitin ligase complex component)	null	null	16829	-0.409786	0.0971151	Yes
NAME	WNT SIGNALING PATHWAY.xls	Description	GENE SYMBOL	GENE_TITLE	RANK IN GENE LIST	RANK METRIC SCORE	RUNNING ES	CORE ENRICHMENT
row_0	186939	Ras-related protein rac-2	null	null	626	1.17647	-0.0202204	No
row_1	172498	Presenilin spe-4	null	null	1283	0.877401	-0.0420574	No
row_2	187536	Putative serine/threonine-protein kinase R03D7.5	null	null	1948	0.592096	-0.0643255	No
row_3	172773	SKp1 Related (ubiquitin ligase complex component)	null	null	3273	0.289124	-0.12216	No
row_4	174257	SKp1 Related (ubiquitin ligase complex component)	null	null	3704	0.237397	-0.131818	No
row_5	183461	hypothetical protein	null	null	4809	0.147587	-0.177797	No
row_6	191169	Mitogen-activated protein kinase	null	null	5028	0.137012	-0.176031	No
row_7	260116	SKp1 Related (ubiquitin ligase complex component)	null	null	5034	0.136617	-0.162787	No
row_8	172017	Presenilin hop-1	null	null	5350	0.120337	-0.166248	No
row_9	179388	RuvB-like 1	null	null	5949	0.0941742	-0.18496	No
row_10	172856	Protein mom-5	null	null	6742	0.0661755	-0.214125	No
row_11	176866	GLH-binding kinase 1	null	null	6898	0.0615354	-0.208965	No
row_12	174058	F-box/WD repeat-containing protein lin-23	null	null	8283	0.0175444	-0.270032	No
row_13	180853	C-terminal-binding protein 1	null	null	8343	0.0156203	-0.259698	No
row_14	179572	CalciNeurin B	null	null	8777	0.00278155	-0.269518	No
row_15	177460	Stress-activated protein kinase jnk-1	null	null	9602	-0.0196081	-0.300408	No
row_16	177943	Serine/threonine-protein phosphatase 2B catalytic subunit	null	null	9706	-0.0223588	-0.292445	No
row_17	179358	RING-box protein 1	null	null	10197	-0.0332762	-0.305337	Yes
row_18	176466	Cullin-1	null	null	10415	-0.0386619	-0.303517	Yes
row_19	177921	Calcium/calmodulin-dependent protein kinase type II	null	null	10592	-0.0434223	-0.299488	Yes
row_20	172775	Skp1-related protein	null	null	10806	-0.050388	-0.297452	Yes
row_21	172610	Casein kinase II subunit beta	null	null	11032	-0.0570823	-0.296064	Yes
row_22	172842	Mitogen-activated protein kinase kinase kinase mom-4	null	null	11435	-0.0698563	-0.304213	Yes
row_23	177463	Drosophila PRicKLe homolog	null	null	11640	-0.0765738	-0.301693	Yes
row_24	180904	Protein-serine O-palmitoleoyltransferase porcupine	null	null	11657	-0.0771779	-0.289042	Yes
row_25	190882	Uncharacterized protein	null	null	11705	-0.0786762	-0.278061	Yes
row_26	175524	Casein kinase I isoform alpha	null	null	11825	-0.0827544	-0.27096	Yes
row_27	177111	Ras-related protein ced-10	null	null	11869	-0.0840706	-0.259764	Yes
row_28	171677	hypothetical protein	null	null	11989	-0.0879153	-0.252663	Yes
row_29	175802	Armadillo repeat-containing protein wrm-1	null	null	12047	-0.0896909	-0.242221	Yes
row_30	173338	Beta-catenin-like protein hmp-2	null	null	12070	-0.0904739	-0.229893	Yes
row_31	180982	Beta-catenin/armadillo-related protein 1	null	null	12145	-0.0926654	-0.220367	Yes
row_32	186392	DAAM (Disheveled-Associated Activator of Morphogenesis) homolog	null	null	12195	-0.0940708	-0.209494	Yes
row_33	3565407	cAMP-dependent protein kinase catalytic subunit	null	null	12388	-0.100805	-0.206327	Yes
row_34	266854	DiSHevelled related	null	null	12738	-0.113901	-0.21162	Yes
row_35	179217	Protein mom-2	null	null	12807	-0.116547	-0.201771	Yes
row_36	178458	Ras-like GTP-binding protein rhoA	null	null	12831	-0.117499	-0.189497	Yes
row_37	173149	Glycogen synthase kinase-3	null	null	12918	-0.120627	-0.180618	Yes
row_38	173399	Protein Wnt-1	null	null	12993	-0.123335	-0.171092	Yes
row_39	177401	Secreted Frizzled-Related Protein	null	null	13154	-0.129711	-0.166201	Yes
row_40	178214	Cullin-6	null	null	13237	-0.132856	-0.157106	Yes
row_41	176808	Serine/threonine kinase NLK	null	null	13359	-0.138593	-0.150113	Yes
row_42	178537	1-phosphatidylinositol 4,5-bisphosphate phosphodiesterase beta egl-8	null	null	13385	-0.139481	-0.137947	Yes
row_43	180431	Dwarfin sma	null	null	13471	-0.143068	-0.129014	Yes
row_44	173894	DiSHevelled related	null	null	13683	-0.153085	-0.126871	Yes
row_45	181166	Protein kinase C	null	null	13783	-0.158466	-0.118692	Yes
row_46	172978	Casein kinase II subunit alpha	null	null	13805	-0.159551	-0.10631	Yes
row_47	173287	Axin-like protein pry-1	null	null	13887	-0.163682	-0.0971615	Yes
row_48	191765	SKp1 Related (ubiquitin ligase complex component)	null	null	13917	-0.165294	-0.0852108	Yes
row_49	181344	hypothetical protein	null	null	13973	-0.167941	-0.0746611	Yes
row_50	171832	hypothetical protein	null	null	14054	-0.172313	-0.0654586	Yes
row_51	191762	SKp1 Related (ubiquitin ligase complex component)	null	null	14403	-0.192316	-0.0706981	Yes
row_52	176380	Protein cbp-1	null	null	14527	-0.198748	-0.0638129	Yes
row_53	175815	Dwarfin sma-4	null	null	14557	-0.200397	-0.0518621	Yes
row_54	178768	Frizzled-2	null	null	14650	-0.206481	-0.0433063	Yes
row_55	177138	E3 ubiquitin-protein ligase siah-1	null	null	14718	-0.210307	-0.0334033	Yes
row_56	181446	SKp1 Related (ubiquitin ligase complex component)	null	null	14892	-0.222507	-0.0292124	Yes
row_57	180081	SKp1 Related (ubiquitin ligase complex component)	null	null	14972	-0.22767	-0.019956	Yes
row_58	180148	SKp1 Related (ubiquitin ligase complex component)	null	null	15162	-0.241016	-0.0166273	Yes
row_59	178493	SKp1 Related (ubiquitin ligase complex component)	null	null	15172	-0.241506	-0.00359881	Yes
row_60	177821	Uncharacterized protein	null	null	15255	-0.24735	0.00549589	Yes
row_61	180441	Presenilin sel-12	null	null	15334	-0.252674	0.0148061	Yes
row_62	181447	SKp1 Related (ubiquitin ligase complex component)	null	null	15525	-0.26717	0.0180809	Yes
row_63	181445	SKp1 Related (ubiquitin ligase complex component)	null	null	15535	-0.267906	0.0311094	Yes
row_64	171849	Protein pop-1	null	null	15741	-0.285113	0.0335759	Yes
row_65	178839	SKp1 Related (ubiquitin ligase complex component)	null	null	16046	-0.313008	0.0307075	Yes
row_66	173729	SKp1 Related (ubiquitin ligase complex component)	null	null	16075	-0.315654	0.0427121	Yes
row_67	178840	SKp1 Related (ubiquitin ligase complex component)	null	null	16190	-0.326492	0.0500824	Yes
row_68	180579	Vang-like protein	null	null	16235	-0.333181	0.0612248	Yes
row_69	178447	SKp1 Related (ubiquitin ligase complex component)	null	null	16314	-0.342986	0.0705351	Yes
row_70	178496	SKp1 Related (ubiquitin ligase complex component)	null	null	16348	-0.346671	0.0822703	Yes
row_71	178495	SKp1 Related (ubiquitin ligase complex component)	null	null	16594	-0.377378	0.0825812	Yes
row_72	174941	G1/S-specific cyclin-D	null	null	16632	-0.381525	0.0941009	Yes
row_73	178494	SKp1 Related (ubiquitin ligase complex component)	null	null	16829	-0.409786	0.0970524	Yes
_x001A_
