# Supplementary material for: Comprehensive phenotyping and transcriptome profiling to study nanotoxicity in C. elegans
Source: PeerJ. 2020 Feb 27;8:e8684. doi: 10.7717/peerj.8684 (PMC7049462; doi:10.7717/peerj.8684)
Supplement: Supplemental Information 2 — Raw data/raw numbers for locomotion velocity, body length, reproduction capacity and neurotoxicity for Figs. 1–4 are provided, respectively. [file peerj-08-8684-s007.xlsx]

## Sheet: Legend
Legend	LV: Lcomotion velocity
	L: Body length
	R: Reproduction
	HT: Head thrashes

## Sheet: Fig.1 LV_Ag
0	10	50
112.209	66.5591	25.7847
124.79	48.1549	42.0917
243.035	70.7952	16.7132
48.1407	65.4458	13.2357
154.238	35.9985	43.0342
182.638	54.2507	64.2188
196.34	87.4801	38.228
154.555	121.743	23.4276
18.1015	120.191	53.1108
140.565	104.694	117.04
34.9825	15.8483	47.5775
60.7872	109.204	24.4085
74.153	27.48	83.8156
126.052	126.608	25.4725
224.004	178.614
82.8105	123.678
32.8753	29.1802
128.679	162.61
107.532	158.536
119.7	122.706
100.994
126.415
242.119
195.236
131.058
213.165
168.2
73.3016
208.088
123.083
87.9683
128.476
166.831
179.414
200.257
160.688
183.863
143.858
169.556
211.431
174.161
214.151
138.611
36.7109
138.627
44.8258
210.72
62.2567
196.04
261.958
247.164
253.662
266.06
291.556
218.802
239.218
135.606
60.2644
154.84
163.204
116.453
113.625
147.297
29.9233
180.046
181.703
179.429
184.518
196.825
89.4927
184.733
40.0047
191.8
128.43
158.694
147.648
226.528
201.856
118.655
240.593
214.056
193.023
84.5005
181.886
149.977
118.517
78.7901
177.479
101.658
87.723
185.025
161.817
189.828
222.633
115.494
46.8929
96.362
110.646
74.0015
38.2127
231.223
112.505
139.658
140.325
229.624
119.063
208.834
150.409
223.944
142.006
191.035

## Sheet: Fig.1 LV_SiO2
0	10	50
161.817	66.7782	49.0059
189.828	31.9752	55.806
112.209	117.415	73.2868
124.79	102.994	65.1064
243.035	67.508	103.598
48.1407	11.4592	39.6472
154.238	7.48282	56.5562
182.638	58.4797	76.8696
196.34	16.9901	120.278
154.555	155.491	177.271
18.1015	148.826	40.1837
140.565	136.413	84.1743
34.9825	53.0666	81.4814
60.7872	85.4946	27.7166
74.153	82.3816	76.2285
126.052	30.0364	117.447
224.004	50.1376	25.178
82.8105	75.1273	137.158
32.8753	133.239	128.255
128.679	100.742	138.708
107.532	74.4671	110.902
119.7
100.994
126.415
242.119
195.236
131.058
213.165
168.2
73.3016
208.088
123.083
87.9683
128.476
166.831
179.414
200.257
160.688
183.863
143.858
169.556
211.431
174.161
214.151
138.611
36.7109
138.627
44.8258
210.72
62.2567
196.04
261.958
247.164
253.662
266.06
291.556
218.802
239.218
135.606
60.2644
154.84
163.204
116.453
113.625
147.297
29.9233
180.046
181.703
179.429
184.518
196.825
89.4927
184.733
40.0047
191.8
128.43
158.694
147.648
226.528
201.856
118.655
240.593
214.056
193.023
84.5005
181.886
149.977
118.517
78.7901
177.479
101.658
87.723
185.025
161.817
189.828
222.633
115.494
46.8929
96.362
110.646
74.0015
38.2127
231.223
112.505
139.658
140.325
229.624
119.063
208.834
150.409
223.944
142.006
191.035

## Sheet: Fig.1 LV_TiO2
0	10	50
112.209	219.078	66.9975
124.79	132.72	152.287
243.035	80.3059	127.327
48.1407	188.962	123.623
154.238	211.969	158.617
182.638	225.846	25.984
196.34	245.301	33.2817
154.555	204.796	154.972
18.1015	129.06	120.839
140.565	22.6806	40.4123
34.9825	254.247	89.8987
60.7872	260.807	194.302
74.153	142.411	104.785
126.052	249.972	160.502
224.004	239.138	187.411
82.8105	261.005	55.6786
32.8753		44.7606
128.679		35.0566
107.532		96.0647
119.7		58.1704
100.994		37.1711
126.415		90.4728
242.119		163.012
195.236		184.642
131.058
213.165
168.2
73.3016
208.088
123.083
87.9683
128.476
166.831
179.414
200.257
160.688
183.863
143.858
169.556
211.431
174.161
214.151
138.611
36.7109
138.627
44.8258
210.72
62.2567
196.04
261.958
247.164
253.662
266.06
291.556
218.802
239.218
135.606
60.2644
154.84
163.204
116.453
113.625
147.297
29.9233
180.046
181.703
179.429
184.518
196.825
89.4927
184.733
40.0047
191.8
128.43
158.694
147.648
226.528
201.856
118.655
240.593
214.056
193.023
84.5005
181.886
149.977
118.517
78.7901
177.479
101.658
87.723
185.025
161.817
189.828
222.633
115.494
46.8929
96.362
110.646
74.0015
38.2127
231.223
112.505
139.658
140.325
229.624
119.063
208.834
150.409
223.944
142.006
191.035

## Sheet: Fig 1. LV_CeO2
0	10	50
112.209	124.694	125.885
124.79	170.807	134.377
243.035	169.644	97.8423
48.1407	83.313	139.394
154.238	121.597	46.6583
182.638	174.495	11.5446
196.34	107.599	23.6587
154.555	169.354	21.6614
18.1015	141.21	227.278
140.565	150.208	175.746
34.9825	165.401	181.395
60.7872	199.154	168.205
74.153	303.187	119.443
126.052	187.5	48.9198
224.004	185.544	67.3534
82.8105	246.117	191.108
32.8753	38.1255	171.881
128.679	73.3928
107.532
119.7
100.994
126.415
242.119
195.236
131.058
213.165
168.2
73.3016
208.088
123.083
87.9683
128.476
166.831
179.414
200.257
160.688
183.863
143.858
169.556
211.431
174.161
214.151
138.611
36.7109
138.627
44.8258
210.72
62.2567
196.04
261.958
247.164
253.662
266.06
291.556
218.802
239.218
135.606
60.2644
154.84
163.204
116.453
113.625
147.297
29.9233
180.046
181.703
179.429
184.518
196.825
89.4927
184.733
40.0047
191.8
128.43
158.694
147.648
226.528
201.856
118.655
240.593
214.056
193.023
84.5005
181.886
149.977
118.517
78.7901
177.479
101.658
87.723
185.025
161.817
189.828
222.633
115.494
46.8929
96.362
110.646
74.0015
38.2127
231.223
112.505
139.658
140.325
229.624
119.063
208.834
150.409
223.944
142.006
191.035

## Sheet: Fig 1. LV_Al2O3
0	10	50
112.209	116.357	39.8283
124.79	101.91	34.9147
243.035	197.454	71.3484
48.1407	185.35	36.5078
154.238	167.762	106.566
182.638	152.285	122.048
196.34	69.5083	20.9244
154.555	115.82	130.292
18.1015	105.23	126.772
140.565	100.907	192.299
34.9825	86.4582	133.871
60.7872	260.358	144.128
74.153	249.728	179.381
126.052	194.694	108.612
224.004	123.765	196.673
82.8105	179.366	185.729
32.8753	131.945	135.703
128.679	156.357	119.691
107.532	185.903	84.7956
119.7	142.755	74.5908
100.994
126.415
242.119
195.236
131.058
213.165
168.2
73.3016
208.088
123.083
87.9683
128.476
166.831
179.414
200.257
160.688
183.863
143.858
169.556
211.431
174.161
214.151
138.611
36.7109
138.627
44.8258
210.72
62.2567
196.04
261.958
247.164
253.662
266.06
291.556
218.802
239.218
135.606
60.2644
154.84
163.204
116.453
113.625
147.297
29.9233
180.046
181.703
179.429
184.518
196.825
89.4927
184.733
40.0047
191.8
128.43
158.694
147.648
226.528
201.856
118.655
240.593
214.056
193.023
84.5005
181.886
149.977
118.517
78.7901
177.479
101.658
87.723
185.025
161.817
189.828
222.633
115.494
46.8929
96.362
110.646
74.0015
38.2127
231.223
112.505
139.658
140.325
229.624
119.063
208.834
150.409
223.944
142.006
191.035

## Sheet: Fig 1. LV_CuO
0	10	50
112.209	40.9239	100.576
124.79	145.885	48.832
243.035	154.579	96.9733
48.1407	127.849	35.8843
154.238	91.0824	30.2792
182.638	172.336	77.415
196.34	60.6389	55.8868
154.555	66.1143	60.2078
18.1015	155.779	120.375
140.565	113.569	51.1586
34.9825	169.397	158.634
60.7872	80.3066	140.514
74.153	125.485	51.9061
126.052	120.854	174
224.004	126.87	233.601
82.8105	108.834	196.123
32.8753	128.284	74.093
128.679		121.909
107.532		98.752
119.7		204.189
100.994
126.415
242.119
195.236
131.058
213.165
168.2
73.3016
208.088
123.083
87.9683
128.476
166.831
179.414
200.257
160.688
183.863
143.858
169.556
211.431
174.161
214.151
138.611
36.7109
138.627
44.8258
210.72
62.2567
196.04
261.958
247.164
253.662
266.06
291.556
218.802
239.218
135.606
60.2644
154.84
163.204
116.453
113.625
147.297
29.9233
180.046
181.703
179.429
184.518
196.825
89.4927
184.733
40.0047
191.8
128.43
158.694
147.648
226.528
201.856
118.655
240.593
214.056
193.023
84.5005
181.886
149.977
118.517
78.7901
177.479
101.658
87.723
185.025
161.817
189.828
222.633
115.494
46.8929
96.362
110.646
74.0015
38.2127
231.223
112.505
139.658
140.325
229.624
119.063
208.834
150.409
223.944
142.006
191.035

## Sheet: Fig 2. L_Ag
Fi	10	50
1200.12	968.41	739.2
1088.98	1029.05	881.08
1218.8	923.58	739.51
1286.56	906.01	1010.97
1330.37	1083.44	817.27
1223.38	982.37	703.84
1193.45	1045.76	725.78
1128.25	1042.54	684.21
1351.41	915.64	1006.86
1399.92	923.18	786.27
1138.74	1138.69	750.54
1392.32	918.04	743.53
1195.57	1001.17	758.2
1260.33	1167.34	926.04
1196.17	951.53	797.96
1209.47	919.29	1072.89
1190.87	1087.56	872.38
1172.68	1061.24	690.14
1397.15	1141.01	1068.76
1298.84	1149.55	1054.14
1154.08		1216.34
1156.41
1128.88
1372.72
1176.44
1111.04
1170.66
1192.05
1130.4
1153.63
1234.9
1175.47
1133.9
986.76
1212.46
1159.72
1153.07
1134
1126.46
1164.93
1148.8
1157.7
1176.98

## Sheet: Fig 2. L_SiO2
0	10	50
1200.12	826.94	1041.07
1088.98	1004.44	894.33
1218.8	1104.21	1022.03
1286.56	936.06	1042.38
1330.37	992.16	1068.81
1223.38	942.25	1128.75
1193.45	984.21	1047.01
1128.25	1073.29	898.14
1351.41	1133.1	1049.54
1399.92	900.22	1090.64
1138.74	863.46	987.8
1392.32	1069.68	914.2
1195.57	1255.12	1035.33
1260.33	1099.53	1007.26
1196.17	1079.83	1171.01
1209.47	1071.64	1032.81
1190.87	1086.1	1032.51
1172.68	884.49	927.75
1397.15	944.51	960.34
1298.84	1090.24	963.36
1154.08	1112.28	1032.11
1156.41	1050.65	847.8
1128.88	992.47
1372.72
1176.44
1111.04
1170.66
1192.05
1130.4
1153.63
1234.9
1175.47
1133.9
986.76
1212.46
1159.72
1153.07
1134
1126.46
1164.93
1148.8
1157.7
1176.98

## Sheet: Fig 2. L_TiO2
0	10	50
1200.12	1094.73	1254.47
1088.98	1296.45	1191.01
1218.8	1198.78	1053.77
1286.56	1223.32	979.98
1330.37	1242.79	1064.75
1223.38	1284.33	1027.79
1193.45	1269.26	1151.33
1128.25	1186.91	981.26
1351.41	1297.05	1132.8
1399.92	1160.41	1141.13
1138.74	1262.85	1209.29
1392.32	1109.93	973.77
1195.57	1251.63	1051.19
1260.33	1170.25	1134.35
1196.17	1250.91	1257.6
1209.47	1252.03	1123.41
1190.87	1246.45	1237.71
1172.68	1261.78	1136.84
1397.15	1152.77	1148.88
1298.84	1173.46	1106.49
1154.08	1248.42	1023.01
1156.41	1225.2	1130.35
1128.88	1191.34	1160.72
1372.72	1203.1	1145.77
1176.44	1218.85	1258.66
1111.04	1106.01	1153.43
1170.66	1253.24	1145.74
1192.05	1128.07	1061.2
1130.4	1201.63	1327.52
1153.63		1069.49
1234.9		1221.22
1175.47
1133.9
986.76
1212.46
1159.72
1153.07
1134
1126.46
1164.93
1148.8
1157.7
1176.98

[truncated: 15 more sheets:  Fig 2. L_CeO2, Fig 2. L_Al2O3, Fig 2. L_CuO, Fig 3. R_Ag, Fig 3. R_SiO2, Fig 3. R_TiO2, Fig 3. R_CeO2, Fig 3. R_Al2O3, Fig 3. R_CuO, Fig 4. HT_Ag, Fig 4. HT_SiO2, Fig 4.HT_TiO2, Fig 4. HT_CeO2, Fig 4. HT_Al2O3, Fig 4. HT_CuO]
